# Supplementary material for: Interaction Analysis of lncRNA and mRNA Based on the Full-Length Transcriptome of the Nymph-to-Adult Developmental Transition of Sogatella furcifera
Source: MDPI journal article supplement (doi:10.3390/insects14040308), 2023-03-23
Supplement: s1 [file s1]

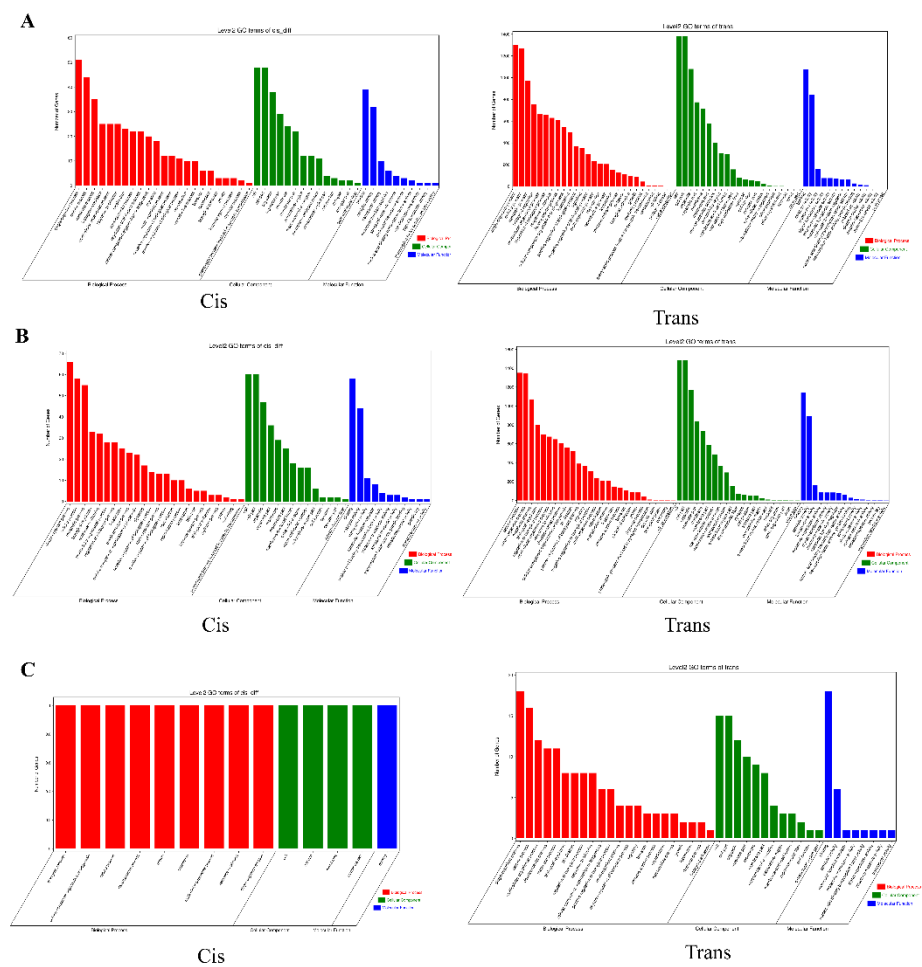

**Fig S1.** GO enrichment analysis of the target genes of different expressed lncRNAs. (A) PE-vs-DE cis/trans-lncRNA target gene GO enrichment analysis; (B) PE-vs-AE cis/trans-lncRNA target gene GO enrichment analysis; (C) DE-vs-AE cis/trans-lncRNA target gene GO enrichment analysis.

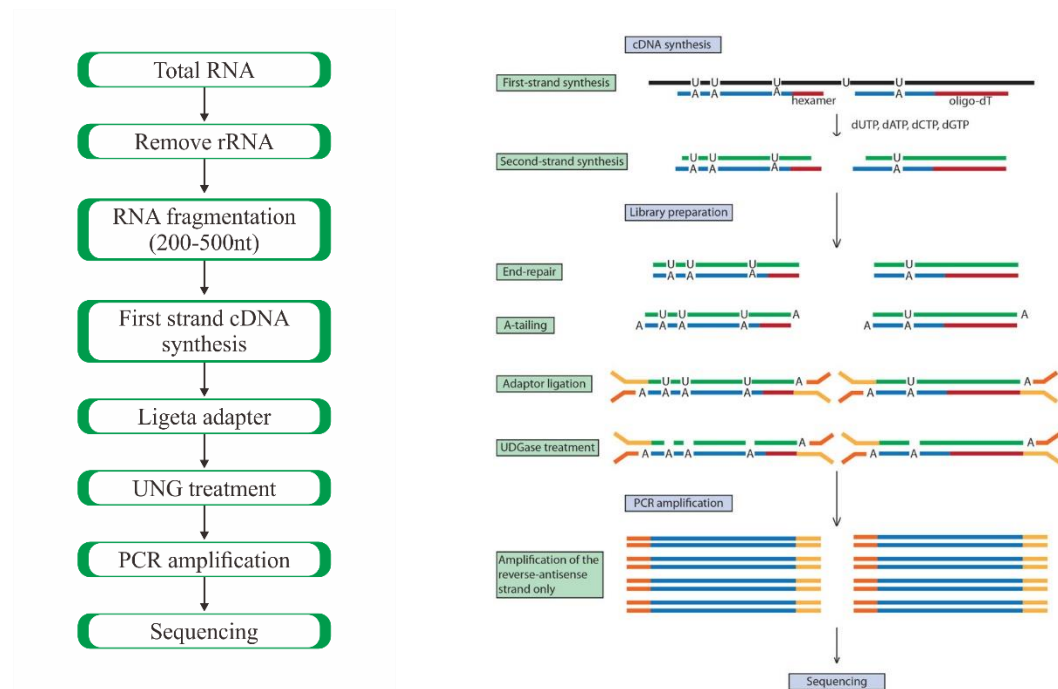

**Fig S2.** cDNA library construction schematic sequenced using Illumina HiSeq2500 by Gene Denovo Biotechnology Co. (Guangzhou, China)
