# Supplementary material for: Interaction Analysis of lncRNA and mRNA Based on the Full-Length Transcriptome of the Nymph-to-Adult Developmental Transition of Sogatella furcifera
Source: Insects. 2023 Mar 23;14(4):308. doi: 10.3390/insects14040308 (PMC10141146; doi:10.3390/insects14040308)
Supplement: Supplementary file 1 [file insects-14-00308-s001.zip]

Archive with 11 entries (11 files):
- FigS1---FigS2.pdf
- Table S1.  Primers used for RT-qPCR..xlsx
- Table S10.  LncRNA -based prediction of amino sugar and nucleotide sugar metabolism pathway genes..xls
- Table S2. Summary of RNA sequencing data from S. furcifera.xls
- Table S3.  Differentially expressed lncRNAs identified in S. furcifera.xls
- Table S4.  KEGGE analysis of differentially expressed mRNA.xls
- Table S5. STEM software cluster analysis of mRNA and lncRNA expression trend results.xlsx
- Table S6.  Co-expressed network analysis of differentially expressed lncRNA and mRNA..xls
- Table S7.  Prediction of the target genes of different lncRNAs..xlsx
- Table S8.  GO enrichment analysis of target gene..xlsx
- Table S9. KEGG enrichment analysis of target gene.xlsx
