# Supplementary material for: Interaction Analysis of lncRNA and mRNA Based on the Full-Length Transcriptome of the Nymph-to-Adult Developmental Transition of Sogatella furcifera
Source: Insects. 2023 Mar 23;14(4):308. doi: 10.3390/insects14040308 (PMC10141146; doi:10.3390/insects14040308)
Supplement: Supplementary file 1 [file insects-14-00308-s001.zip › Table S1. Primers used for RT-qPCR..xlsx]

## Sheet: Sheet1
High throughput sequencing results verified the primer table
	引物名称	上游引物（5′-3′）	下游引物（5′-3′）	扩增效率
lncRNA	MSTRG.16087.1	AGTGCCACTGCCACAACCAA	GTCAACGACCTGCTCCAACCT	1.162
	MSTRG.4465.1	ACCTCCTCAACAGCGTGATACC	ACTCTGTCGCCATCCGTCATTG	0.979
	MSTRG.32064.1	GCTATTCCAGTGCCTGAACCTC	ACCAGGACCAGTCGTTGTGATG	1.069
	MSTRG.17223.1	TGGCTCTTGCTCTGATCTGGAT	TGGAGGCGAATGATGACGACTT	0.933
	MSTRG.22069.1	CCACTCTTGTCTGTGCTCGGTT	GGAACGCTCGTCTGACAGGATA	0.947
	MSTRG.22544.1	AGTGTGGCTGATTGACTGGGTT	GGTGCGAGGTGATTGACGAGAT	1.185
	MSTRG.35629.1	CGTCGCCTCACTCTTACGATGA	CGTCTCCGACCAGCTCTCAATT	1.187
	MSTRG.1625.1	TGACGGTACGGTTCTCAACTGG	CGCTAGTCCGATTTGCTTCCTC	1.185
	MSTRG.28023.1	GCTCGCACTTGTCGTCATCGT	CCAGACCGCAACTCGCAACTTA	1.082
	MSTRG.36165.1	AGGAGATGCTGAGGCGTGTGA	GCAGTTTGAGGCGGGCAAGTA	1.187
mRNA	SFATP-6-PFK	CGCTTGAAGCAGGACACTCGTA	GCAGCCTCACAGCCTGATTACC	1.052
	SFCHS1	GCTGACAATGCGTCGTGAAGTG	CGGCGTTGGATATGCGTGGAT	1.183
	SFCHt5	CCACCACGACAACTACCACCAC	CGGAACTTGTGCTGGAACCTCA	1.111
	SFELOj	AGAGGCGAGCAAGCTGTCATG	CGGCAGCCTAGTGTGATTCCAA	1.004
	SFELOm	GGTCCGAGGTACATGCTACACA	TCTCATGGCGTCTGGACTTCTC	0.944
	SFGSTS1	ACCAACAACACCGTTCGGACAA	CCAACAGCAAGGCGGAAATCTG	101.4%%
	SFHK1	TGTGTGGATGAAGGGACAATGC	GCAATGGTTGAGTCAGGTCGAT	95.1%%
	SFPTL	CGGCATAGCATTGAACGCATTG	TCAGCGACTGTACCATCACTCT	104.1%%
	SFSFP	CAGCATCGGCAAGGACAGACAG	CAGCCAGTATGCGGAACGAGTC	111.7%%
	SFSCAD	GCTGCTTCTGAGACTGCCACTT	GCTGCAATGACCAATCGCTGAA	1.064
Spatiotemporal expression patterns of 12 differentially expressed lncRNAs.
引物名称	上游引物（5′-3′）	下游引物（5′-3′）	扩增效率
MSTRG.2447.1	GCTGTTGTAGTCCTGGCCGTAG	TCGTTGCCGCTGAGAACTTCC	0.994
MSTRG.23212.1	CATTGACATCGCTGACGCCAAG	AGGAGGAAGACCGACAACAAGC	1.176
MSTRG.37207.2	CAGGACCGTCATCCAACGAAGG	GCTTGAGCTGGGTACACCGTAG	0.944
MSTRG.16087.1	AGTGCCACTGCCACAACCAA	GTCAACGACCTGCTCCAACCT	1.162
MSTRG.16086.1	GTCAACGACCTGCTCCAACCT	AGTGCCACTGCCACAACCAA	1.195
MSTRG.37208.3	GCTTGAGCTGGGTACACCGTAG	CAGGACCGTCATCCAACGAAGG	1.075
MSTRG.4465.1	ACCTCCTCAACAGCGTGATACC	ACTCTGTCGCCATCCGTCATTG	0.979
MSTRG.32064.1	GCTATTCCAGTGCCTGAACCTC	ACCAGGACCAGTCGTTGTGATG	1.069
MSTRG.17223.1	TGGCTCTTGCTCTGATCTGGAT	TGGAGGCGAATGATGACGACTT	0.933
MSTRG.19835.2	GCGTGTAGATTCCAAGCCGTTA	AATCCGCGCTGCTCTGACA	1.086
MSTRG.22069.1	CCACTCTTGTCTGTGCTCGGTT	GGAACGCTCGTCTGACAGGATA	0.947
MSTRG.22544.1	AGTGTGGCTGATTGACTGGGTT	GGTGCGAGGTGATTGACGAGAT	1.185
