# Supplementary material for: Interaction Analysis of lncRNA and mRNA Based on the Full-Length Transcriptome of the Nymph-to-Adult Developmental Transition of Sogatella furcifera
Source: Insects. 2023 Mar 23;14(4):308. doi: 10.3390/insects14040308 (PMC10141146; doi:10.3390/insects14040308)
Supplement: Supplementary file 1 [file insects-14-00308-s001.zip › Table S2. Summary of RNA sequencing data from S. furcifera.xls]

## Sheet: Sheet1
	Table S2 Summary of RNA sequencing data from S. furcifera
	Sample	Raw Datas	Clean Datas（%）	Q20（%）	Q30（%）	GC content	Mapped reads
	PE-1	85440762	85309942 (99.85%)	0.9798	0.9393	0.479	55830963 (75.25%)
	PE-2	84970448	84830912 (99.84%)	0.9788	0.9374	0.4822	51274712 (71.03%)
	PE-3	72986500	72864874 (99.83%)	0.9796	0.9388	0.4778	46381531 (71.24%)
	DE-1	82410014	82316278 (99.89%)	0.977	0.934	0.4714	72749056 (88.38%)
	DE-2	81135270	81029638 (99.87%)	0.9817	0.944	0.4839	69551082 (85.83%)
	DE-3	85159150	85038486 (99.86%)	0.9786	0.9367	0.463	72564048 (85.33%)
	AE-1	97513610	97386442 (99.87%)	0.9779	0.9364	0.486	58333420 (70.84%)
	AE-2	78394386	78304716 (99.89%)	0.9835	0.9478	0.4816	49221481 (73.40%)
	AE-3	84010454	83898754 (99.87%)	0.9817	0.944	0.4841	52356184 (74.13%)
