# Supplementary material for: Interaction Analysis of lncRNA and mRNA Based on the Full-Length Transcriptome of the Nymph-to-Adult Developmental Transition of Sogatella furcifera
Source: Insects. 2023 Mar 23;14(4):308. doi: 10.3390/insects14040308 (PMC10141146; doi:10.3390/insects14040308)
Supplement: Supplementary file 1 [file insects-14-00308-s001.zip › Table S3. Differentially expressed lncRNAs identified in S. furcifera.xls]

Table S3 Differentially expressed lncRNAs identified in S.furcifera
id	PE-1_fpkm	PE-2_fpkm	PE-3_fpkm	AE-1_fpkm	AE-2_fpkm	AE-3_fpkm	DE-1_fpkm	DE-2_fpkm	DE-3_fpkm
MSTRG.10008.3	0	0	0	18.96	10.36	15.87	7.32	9.99	5.13
MSTRG.10091.1	0	0	0	1.25	0.39	0.73	0.42	0	0.82
MSTRG.102.1	1.75	1.9	2.54	0.55	0.92	0.37	0.87	0.64	0.76
MSTRG.10233.1	0.56	0.23	0.86	1.67	1.6	2.38	1.72	2.06	1.94
MSTRG.10279.1	7.07	3.65	5.11	1.97	2.75	0.9	4.6	8.52	6.2
MSTRG.10292.1	2.78	3.6	2.63	1.73	3.3	2.04	4.85	11.23	8.18
MSTRG.10294.2	3.09	4.46	2.68	21.62	24.66	20.53	14.36	14.33	20.84
MSTRG.10391.1	1.61	1.15	1.35	0.14	0.08	0.08	0	0.25	0.25
MSTRG.10553.3	0.58	0.98	0.56	0.76	0.18	0.61	0	0	0
MSTRG.10562.1	29.46	34.63	34.08	0.14	0.4	1.2	1.27	0.25	0.67
MSTRG.10563.1	2.62	1.56	3.21	0.33	0	0	0	0	0
MSTRG.10749.1	4.15	3.3	3.03	1.23	1.45	0.95	1.26	1.14	1.17
MSTRG.10858.1	3.32	4.2	3.19	9.39	6.45	10.73	5.41	14.4	8.51
MSTRG.10938.2	5.44	2.67	2.61	1.34	0.81	1.41	0.57	6.06	3.72
MSTRG.10940.1	1.95	1.28	0.82	0.09	0	0.34	0.17	0.16	0.66
MSTRG.11030.2	9.22	8.06	6.97	16.8	17.68	17.05	16.19	15.2	15.9
MSTRG.11031.1	1.31	1.36	1.44	5.2	4.44	4.01	3.07	3.5	3.57
MSTRG.11054.2	0.47	0.66	0.85	0.64	0.57	3.96	3.94	2.11	2.48
MSTRG.11105.1	3.83	6.25	3.33	0.46	0.7	1.15	1.87	1.81	2.77
MSTRG.11140.1	1.54	1.38	1.05	4.32	3.58	0.28	6.91	6.19	4.11
MSTRG.11149.1	0.46	1.74	3.43	0.09	0	0.1	0.32	1.88	0.56
MSTRG.11192.1	0.08	0.17	0.09	0.59	0	0.48	0.99	0.78	1.33
MSTRG.11198.1	6.2	8.24	8.35	16.95	16.38	22.52	24.68	21.46	23.59
MSTRG.11199.1	310.53	340.47	316.28	17.45	27.74	21.73	38.26	30.13	34.4
MSTRG.11201.1	2.64	6.14	5.57	0	0.59	0.14	0.16	0.31	1.17
MSTRG.11203.1	126.37	384.51	245.25	38.35	57.69	58.44	73.02	67.62	67.93
MSTRG.11204.1	7.11	31.09	19.58	2.5	3.94	3.47	3.65	6.36	5.33
MSTRG.11223.4	0.18	0.09	0.04	1.46	1.57	1.84	0.94	1.52	1.57
MSTRG.11263.1	2.11	2.39	1.67	0.83	0.5	0.57	0.17	0.69	0.6
MSTRG.11277.1	0.87	1.57	1.2	0.4	0.36	0.18	0.31	0.3	0.33
MSTRG.11349.1	3.45	4.06	4.55	0	0.09	0.13	0	0	0.05
MSTRG.11373.1	0.81	0.63	0.36	3.11	1.4	2.98	2.31	2.77	3.13
MSTRG.11436.1	54.57	111.38	169.79	17.47	22.83	27.62	64.91	270.82	52.57
MSTRG.11462.2	0.16	0.13	0.14	0.38	0.07	0.68	0.8	0.45	0.87
MSTRG.11466.1	0.34	0.42	0.64	1.83	0.89	1.16	0.71	0.94	1.19
MSTRG.11495.1	295.56	657.3	455.88	141.59	154.99	163.17	559.99	221.58	278.47
MSTRG.11495.2	69.63	121.11	86.84	13.57	16.18	18.08	91.26	93.64	43.85
MSTRG.11563.1	1.04	1.01	3.47	0.25	0.45	0.46	0.61	0.51	1.63
MSTRG.116.3	3.33	3.36	3.35	1.3	1.62	1.14	1.66	1.8	2.05
MSTRG.11609.1	5.6	5.19	14.58	0.24	0.07	0.46	0.89	0.14	0.37
MSTRG.11681.1	0.57	0.86	0.49	0.35	0.43	0	0.12	0.15	0
MSTRG.11681.3	2.36	1.73	1.65	0.63	0.34	0.98	0.67	0.96	0
MSTRG.11682.1	3.54	3.34	3.56	2.23	0.9	1.5	1.38	1.02	1.74
MSTRG.11694.1	2.71	1.94	1.96	0.85	0.53	0.79	0.77	0.55	1.09
MSTRG.11728.1	4.29	3.39	3.94	2.24	1.65	1.19	1.35	1.06	1.46
MSTRG.11789.1	27.33	6.52	69.64	0.06	0.07	0.17	0.26	0.18	0
MSTRG.11800.2	36.29	29.04	20.69	2.11	1.73	1.98	2.91	2.1	1.03
MSTRG.11833.2	0.14	0.41	0.32	1.28	1.36	0.43	1.1	0.37	0.46
MSTRG.11906.1	2.32	1.73	3.16	9.24	3.6	11.61	5.23	7.84	11.67
MSTRG.11947.1	1.4	1.49	0.54	4.73	4.2	4.08	4.72	6.3	5.52
MSTRG.12083.1	4.14	3.64	1.74	0.04	0	0.01	0.04	0.03	0.02
MSTRG.12104.1	0.54	0.8	1.18	1.6	1.73	1.77	1.13	0.76	1.4
MSTRG.1212.4	1.02	0.83	1.38	0.98	0.17	1.06	0.14	0.2	0
MSTRG.12123.1	0.16	0.71	0.1	1.14	0.52	1.14	0.84	1.44	2.93
MSTRG.12179.1	2.59	1.5	1.22	0.02	0.01	0.01	0	0	0.03
MSTRG.1219.1	0.32	1.01	0.63	1.05	1.69	0.86	1.36	2.7	1.71
MSTRG.12191.1	0.48	0.34	0.48	1.78	1.46	1.83	1.21	1.71	1.8
MSTRG.122.1	4.73	6.42	5.6	0	0.55	0	0.2	0.38	0
MSTRG.12251.1	0	0.1	0	0.51	1.55	0.74	1.36	1.51	0.72
MSTRG.1236.2	38.4	34.77	42.68	27.65	21.3	20.9	21.26	18.05	17.62
MSTRG.12398.4	5.72	11.89	8.33	30.86	33.4	34.48	35.7	30.75	16.62
MSTRG.12402.1	0	0	0	0.33	0.13	1.9	0.81	0.39	0
MSTRG.12405.1	0.14	0.3	1	5.32	5.03	5.04	7.31	7.38	4.39
MSTRG.12406.1	1.35	3.64	6.47	20.07	10.64	17.6	27.2	21.75	23.6
MSTRG.12407.1	0.12	0	0	0.88	1.01	0.83	1.08	0.39	1.07
MSTRG.12497.1	2.59	3.47	4.16	0.08	0	0.32	0	0.3	0
MSTRG.12497.2	0.56	0.91	3.03	0.06	0.09	0	0.24	0.36	0.08
MSTRG.12497.3	3.17	4.15	5.83	0.16	0.25	0	0	0	0.17
MSTRG.12498.1	0.96	1.75	3.85	0	0	0.3	0	0.36	0.49
MSTRG.12593.4	0	0	0	0.33	0.38	0.83	0	0.2	0.2
MSTRG.12600.5	2.9	2.66	2.99	1.49	1.46	1.33	0.4	1.26	0.94
MSTRG.12627.1	0.25	0.39	0.19	1.73	1.17	0.56	0.45	1.01	0.51
MSTRG.1267.1	6.07	9.94	5.13	16.2	13.21	15.85	16.77	11.25	17.15
MSTRG.12705.1	0.67	0.84	1.47	2.5	2.46	2.56	2.85	3.62	2.41
MSTRG.12732.1	0.64	0.71	0.91	2.43	2.8	2.28	1.94	5.94	1.26
MSTRG.12854.1	4.26	2.56	2.81	0.3	0.77	0.16	0.09	0.54	0.27
MSTRG.12934.3	2.28	4.51	4.58	6.85	6.86	9.28	19.63	21.47	6.72
MSTRG.1296.2	1.97	0.91	2.06	0	0.14	0.21	0.3	0	0.13
MSTRG.1296.3	1.53	2.02	2.94	0.09	0	0.24	0	0.45	0
MSTRG.12968.2	1.29	1.44	1.66	0	0.07	0	0.08	0	0
MSTRG.12969.1	2.16	6.99	5.03	0	0.12	0	0.38	0.24	0
MSTRG.1309.1	0.52	0.75	0.55	3.79	1.55	2.54	2.36	2.29	2.85
MSTRG.1310.1	1.84	0.51	0.98	6.48	2.64	5.91	4.04	3.11	4.23
MSTRG.1320.1	52.63	157.08	137.39	180.82	150.68	194.58	260.18	269.72	224.32
MSTRG.1321.1	3.23	8.09	8.87	18.1	9.39	12.7	17.3	24.23	17.07
MSTRG.13227.1	0.72	0.56	0.46	3.37	1.47	4.24	2.55	2.97	2.97
MSTRG.13231.2	18.88	15.87	24.75	44.76	23.29	59.41	59.19	47.59	70.04
MSTRG.13238.1	0.04	0.16	0.18	0.83	0.2	1.34	0.59	0.7	0.79
MSTRG.13270.3	0.33	0.86	1.65	0.16	0.29	0.29	1.97	1	2.19
MSTRG.13391.1	0.25	0.24	0.56	1.22	0.62	1.71	0.99	0.72	0.82
MSTRG.13398.2	2.13	3.38	1.94	5.42	5.85	5.55	8.09	8.93	9.23
MSTRG.13401.1	1.14	0.54	0.54	1.67	1.69	2.53	1.75	2.61	2.35
MSTRG.13469.1	29.01	85.34	115.37	17.94	16.32	16.46	21.54	30.96	19.14
MSTRG.13489.1	2.79	6.07	1.28	27.18	5.02	18.84	22	13.95	22.91
MSTRG.13490.1	0	0.07	0	0.68	0.14	0.4	0.38	0.66	1.42
MSTRG.13639.1	0	0	0	2.24	3.47	3.78	0	0	0
MSTRG.13639.3	0.24	0.64	0.31	1.92	2.22	1.25	1.73	3.13	3.53
MSTRG.13656.1	0.17	0.29	0.21	1.82	0.28	1.61	0.81	0.39	2.61
MSTRG.13850.1	1.99	1.27	0.77	0.05	0.37	0.18	0.67	0	0.2
MSTRG.13862.1	6.2	9.03	13.47	1.63	1.36	1.47	3.46	4.38	3.42
MSTRG.13888.2	0.08	0.15	0.4	0.72	0.55	0.4	0.64	0.44	0.51
MSTRG.14018.2	2.32	2.16	2.84	1.07	1.22	0.96	1.26	1.05	1.67
MSTRG.14027.1	0.24	0.53	0.19	1.14	0.17	0.57	3.16	0.72	1.28
MSTRG.1411.1	1.84	1.65	1.01	5.19	4.33	2.94	4.19	3.66	2.02
MSTRG.14134.1	10.49	11.7	13.39	3.25	3.65	4.1	3.75	3.8	3.9
MSTRG.14179.1	3.87	3.62	4.65	2.41	2.35	2.31	1.74	1.91	2.37
MSTRG.14187.1	0.87	0.95	1.2	0.22	0.06	0.12	0.07	0.2	0.3
MSTRG.14187.3	1.03	1.25	0.74	0	0	0	0	0	0.09
MSTRG.14275.1	12.67	7.13	6.56	0.85	0.84	2.14	0.97	1.75	0.85
MSTRG.14339.1	0.69	1.09	0.17	9.02	7.11	7.58	9.92	12.6	5.29
MSTRG.1441.1	0.49	0.48	0.84	1.56	1.03	1.25	0	0.55	0.51
MSTRG.14436.1	17.33	14.82	17.65	5.13	5.96	5.43	7.59	6.54	4.92
MSTRG.14443.1	1.16	2.09	3.12	0.5	0.98	0.34	0.28	1.02	1.28
MSTRG.14443.2	0.68	1.46	1.16	2.78	1.35	2.58	1.54	1.65	0.48
MSTRG.14538.1	2.09	2.52	1.13	6.46	7.17	5.5	3.51	6.14	5.78
MSTRG.14566.1	1.18	1.11	0.64	0.05	0	0.29	0.06	0.11	0.05
MSTRG.14606.1	0.17	0.74	0.61	2.84	4.77	3.41	1.84	0.47	1.05
MSTRG.14616.1	6.85	5.93	7.05	1.2	2.89	1.52	0.95	1.92	1.45
MSTRG.14637.1	1.05	1.63	1.89	5.5	9.09	11.7	10.25	6.43	5.9
MSTRG.14638.1	0.58	0.58	0.64	2.98	2.45	3.45	1.83	2.68	2.74
MSTRG.14661.3	38.55	27.74	42.45	14.43	14.73	16.4	8.59	9.62	10.37
MSTRG.14662.2	30.59	28.38	37.65	8.98	11.7	8.27	13.03	10.72	10.29
MSTRG.1467.1	1.11	1.59	1.07	4.94	8.31	7.67	6.15	6.15	2.5
MSTRG.14691.1	6.7	4.57	9.18	0.83	2.84	2.15	2.55	1.68	1.71
MSTRG.14710.1	9.02	10.7	9.12	18.82	20.75	22.09	36.56	47.47	18.91
MSTRG.14711.1	14.47	11.13	10.59	24.83	29.47	24.45	32.41	46.51	23.81
MSTRG.14922.2	0.43	0.68	0.77	1.06	0.99	1.62	1.24	1.74	1.53
MSTRG.14975.1	10.35	14.61	7.95	38.64	18.42	122.04	43.3	28.57	75.79
MSTRG.14989.1	1.34	0.88	1.5	5.28	2.49	3.83	3.51	4.38	3.24
MSTRG.15086.1	0.27	0.52	0.53	1.19	0.94	0.89	0.82	0.75	0.79
MSTRG.15139.2	2.8	3.19	2.66	6.26	8.46	5.38	4.99	5.67	4.36
MSTRG.15185.2	17.11	27.19	26.52	10.17	6.05	7.69	13.96	10.92	10.41
MSTRG.15203.4	0	0	0.18	0	1.57	3.17	1.38	0.82	0
MSTRG.1527.1	5.65	7.38	7.41	3.81	3.48	4.33	2.58	2.9	4.25
MSTRG.15355.7	4	3.99	3.18	1.87	0.67	0.85	1.79	1.06	0.71
MSTRG.15364.1	4.28	5.69	6.07	2.92	2.14	2.1	2.16	2.31	3.16
MSTRG.15397.1	7.33	9.96	7.25	38.69	35.34	36.6	29.09	26.21	45.58
MSTRG.15471.4	7.8	9.16	5.98	16.32	15.67	17.24	16	20.43	14.42
MSTRG.15623.1	4.87	4.21	8.15	1.13	1.3	0.69	6.38	1.44	0
MSTRG.15631.1	0.22	0.16	0.09	0.63	0.28	0.75	0.77	0.74	0.63
MSTRG.15684.1	21.51	22.91	25.52	5.16	6.17	8.33	7.45	7.51	6.89
MSTRG.15726.1	73.83	94.88	91.96	26.85	26.07	27.37	27.93	33.81	34.3
MSTRG.15953.1	0.82	2.89	1.25	0.24	0.09	0.08	0.38	1.34	2.66
MSTRG.1599.1	3.16	2.95	1.65	10.24	9.24	9.66	5.96	8.95	10.96
MSTRG.15998.8	12.63	21.5	22.3	9.33	6.52	8.24	6.98	7.87	5.04
MSTRG.16063.4	9.67	7.28	8.46	3.96	2.71	3.82	7.04	7.6	6.38
MSTRG.16086.1	3436.84	4199.48	4336.92	74.97	75.46	98.15	128.86	126.82	106.29
MSTRG.16087.1	208.98	244.32	248.64	5.21	5.11	6.23	8.27	8.86	7.66
MSTRG.16157.1	0.21	0	0	0.4	0	0.5	0.49	0.71	1.05
MSTRG.1625.1	9.51	13.79	7.8	11.42	9.6	12.63	4.35	3.31	4.98
MSTRG.16287.1	0.42	0.51	0.25	2.22	1.36	1.89	1.17	1.41	1.34
MSTRG.16393.1	3.08	1.96	2.73	0.56	1.06	1.53	0.68	0.84	1.04
MSTRG.1656.1	0.48	0.41	0.3	1.39	1.06	0.67	0.9	0.64	1.03
MSTRG.1661.1	6.27	7.78	4.8	3.49	3.03	2.06	1.53	1.48	1.51
MSTRG.16618.1	11.81	14.02	14.86	4.48	6.36	5.46	11.19	7.72	9.49
MSTRG.16742.1	1.31	6.96	4.86	0.7	0.72	0	1.54	2.89	2.58
MSTRG.16810.1	0	1.56	0.32	2.63	2.94	2.15	0.17	0	0.26
MSTRG.16835.1	0.54	0.85	0.33	3.26	3.54	0.84	0.57	0.43	0.81
MSTRG.16908.1	110.29	80.91	85.4	2.63	2.29	1.72	1.87	3.36	1.92
MSTRG.16909.1	12.78	6.59	7.42	0.51	0.33	0.31	0.09	0.34	0
MSTRG.17005.1	0.21	0.24	0.41	1.18	1.15	1.27	0.95	0.92	0.9
MSTRG.17050.2	47	69.28	72.89	29.98	30.59	29.46	42.63	32.76	37.26
MSTRG.17095.2	0.28	0.44	0.41	0.06	0	0.01	0.17	0.21	0.34
MSTRG.1716.1	17.77	18.8	23.07	3.28	2.69	4.52	3.64	4.51	3.68
MSTRG.17162.4	9.53	15.54	8.65	31.82	26.22	35.42	26.44	22.07	39.48
MSTRG.17223.1	688.44	1498.06	739.17	14.47	10.05	14.87	24.54	16.44	24.94
MSTRG.1725.1	0.9	1.49	1.27	0.16	0.5	0.2	0.3	0.53	1.25
MSTRG.1725.2	0.39	0.44	0.27	1.55	0.43	1.29	0.6	0.91	0.76
MSTRG.1725.4	1.13	1.28	1.21	0.67	0.28	0.3	0.27	0.33	0.67
MSTRG.1725.5	2.64	5.57	4.71	17.85	20.88	25.49	20.41	20.98	16.8
MSTRG.1728.1	0.74	0.97	1.09	0.29	0.17	0.29	0.12	0.26	0.53
MSTRG.17351.1	0.43	0.53	1.89	0	0	0	0	0	0.05
MSTRG.17390.1	2.56	2.56	3.2	0.96	0.48	1.19	0.78	0.45	0.69
MSTRG.17390.2	4.36	4.41	6.31	1.58	0.87	1.65	1.07	0.63	0.93
MSTRG.17390.3	4.95	6.25	8.06	1.94	1.33	1.97	1.08	1	1.63
MSTRG.17492.2	4.07	6.16	5.51	9.39	10.47	12.89	16.19	16.57	11.48
MSTRG.1751.1	4.31	4.91	5.14	1.61	1.99	1.4	1.32	2.67	2.8
MSTRG.1753.1	48.1	63.88	56.67	21.67	24.26	33.68	32.01	30.09	40.69
MSTRG.17748.2	2.71	2.8	2.6	1.7	1.2	0.94	1.06	1.11	1.93
MSTRG.17864.1	25.53	40.22	34.06	87.42	77.72	86.92	75.65	70.39	88.92
MSTRG.17865.1	0.61	0.62	0.48	1.65	2.31	2.64	1.63	1.64	2.77
MSTRG.17970.1	0.36	0.27	0.3	7.21	4.82	5.24	4.39	7.28	6.42
MSTRG.18015.1	0.98	1.06	0.93	0.47	0.34	0.4	0.41	0.46	0.43
MSTRG.18098.3	2.33	1.69	1.68	0.46	0.26	0.49	0.54	0.56	0.37
MSTRG.18153.1	197.15	381.55	429.12	145.23	95.24	107.16	192.82	172.85	133.94
MSTRG.18162.1	0.07	0.15	0.25	0.57	0.22	1.1	0.63	0.6	1.39
MSTRG.18233.2	0.21	0.61	0.61	0.1	0.43	0.37	0.19	0.03	0.09
MSTRG.18372.1	0.78	1.43	0.75	4.41	1.33	4.01	3.32	5.85	2.89
MSTRG.18378.1	0	0	0	0.16	0.27	1.18	2.67	2.4	1.6
MSTRG.1847.1	1.56	0.55	0.6	4.5	4.64	4.35	3.6	4.22	3.6
MSTRG.18510.1	1.74	2.16	6.16	4.55	2.52	4.32	8.82	9.62	9.9
MSTRG.18511.3	4.96	6.67	7.49	1.77	2.14	2.46	5.3	2.57	3.02
MSTRG.18559.1	82.08	133.31	188.37	53.44	54.83	52.28	79.49	77.62	92.2
MSTRG.18627.1	0	0	0	0.36	0.51	0.39	0.88	0.85	1.08
MSTRG.18635.5	1.8	1.49	1.72	0.16	0.16	0.13	0.13	0.1	0.31
MSTRG.18684.4	6.26	2	3.42	2.35	0.47	2.98	0.8	0.23	0.19
MSTRG.1874.1	4.56	5.36	6.4	2.44	2.13	1.94	1.73	1.79	2.08
MSTRG.1884.2	3.69	5.23	3.56	10.92	12.19	11.05	7.18	7.88	9.2
MSTRG.1893.1	1.59	1.03	1.01	0.26	0.54	0.47	0.37	0.36	0.43
MSTRG.18972.1	0.17	1.51	0.21	2.41	2.11	2.43	3.45	0.76	3.5
MSTRG.19036.1	48	69.59	41.39	280.18	241.11	223.83	196.96	255.06	267.34
MSTRG.19038.1	3.77	5.56	3.85	13.11	8.09	11.72	9.83	9.71	9.44
MSTRG.19040.1	0.1	0.22	0.36	2.93	2.16	0.92	3.24	0.45	1.26
MSTRG.19042.1	1.71	1.97	2.34	0.44	1.01	1.24	0.68	0.74	0.84
MSTRG.19109.1	1.62	1.26	0.93	0.41	0.2	0.36	0.34	0.44	0.33
MSTRG.19135.1	7.66	12.43	6.92	2.73	2.78	2.55	2.91	2.6	2.36
MSTRG.19194.1	0.24	0.43	0.29	1.42	0.97	0.73	0.59	0.57	0.82
MSTRG.192.1	1.1	1.65	1.81	0.07	0.08	0.15	0.26	0	0.17
MSTRG.19231.1	0	0.1	0.2	1.18	1.06	2.64	2.34	1.84	0.78
MSTRG.19255.1	0.07	0.61	0.34	1.31	0.97	2.47	0.16	0.7	2.92
MSTRG.19296.1	0.23	0.99	0.5	0.38	0.72	0.66	0.8	2.73	1.51
MSTRG.1935.2	0.04	0.05	0	0.82	0.38	0.58	0.25	0.34	0.35
MSTRG.19379.1	2.8	2.95	3.02	1.01	1.1	1.08	1.83	1.61	1.5
MSTRG.19686.2	3.8	3.57	3.1	0.6	1.01	0.71	1.34	0.73	3.16
MSTRG.19739.3	0.28	0.55	0.61	1.21	1.8	0.66	1.1	0.83	2.06
MSTRG.19835.1	0.29	0.48	0.57	1.65	1.6	2.08	1.15	1.3	2.38
MSTRG.19835.2	4.55	6.37	3.21	115.76	108.23	105.2	97.46	81.78	73.02
MSTRG.19842.1	9.85	10.69	10.54	53.04	31.24	37.08	27.38	29.4	26.73
MSTRG.19853.1	0.16	1.94	1.62	12.57	6.86	8.85	8.5	10.76	5.78
MSTRG.199.1	2.26	2.54	4.98	0.43	0.61	0.23	1.45	2.04	1.56
MSTRG.19918.1	8.63	5.03	13.45	23.46	7.34	20.3	16.94	23.22	20.87
MSTRG.19942.1	2.14	2.84	2.47	1.25	0.86	1.44	0.67	0.84	0.91
MSTRG.19965.2	1.57	0.46	0.78	4.13	2.85	3.74	0.67	1.28	2.18
MSTRG.19965.3	0.33	2.59	2.05	2.62	4.06	2.2	2.96	3.83	4.3
MSTRG.19973.1	1.97	4.18	4.28	1.21	0.33	1.04	3.37	1.37	0.88
MSTRG.2000.1	0.29	0.43	0.52	1.27	1.71	1.91	0.78	1.4	1.65
MSTRG.20054.2	1.87	1.49	2.7	0.34	0.28	0.14	0.15	0.44	0.09
MSTRG.20058.1	5.31	6.08	6.87	0.47	0.32	0.3	0.11	0.27	0.32
MSTRG.20079.2	3.5	5.08	3.41	1.62	0.74	1.93	1.49	2.07	1.91
MSTRG.20179.1	0.88	0.62	0.8	2.63	2.28	1.92	1.45	1.86	2.5
MSTRG.20188.1	12.91	14.9	15.44	5.5	6.27	6.82	7.22	6.28	7.33
MSTRG.20196.1	10.08	8.28	8.67	3.16	2.03	2.84	2.68	2.35	2.79
MSTRG.20210.1	69.88	94.82	114.18	39.18	44.29	49.77	99.74	80.54	57.48
MSTRG.20211.5	2.81	2.41	5.2	0.81	0	0	3.4	1.34	1.2
MSTRG.20211.7	5.68	9.7	8.32	1.88	1.97	1.53	0	0	2.26
MSTRG.20338.1	4.34	6.14	5.86	11.42	16.97	15.51	14.3	16.84	10.02
MSTRG.2046.2	0	0	0	0.75	0	0.73	0.14	0.39	0.42
MSTRG.20487.1	1.14	0.67	3.02	3.54	1.11	3.41	3.59	2.93	5.07
MSTRG.20495.1	0.55	0.75	0.54	3.22	1.28	2.85	2.91	2.23	3.63
MSTRG.20502.1	0.48	0.97	0.12	6.89	1.88	2.18	3.26	2.07	4.55
MSTRG.20535.1	0.43	0.6	0.66	2.37	2.57	2.61	2.47	1.93	1.57
MSTRG.20583.2	3.07	4.08	3.5	3.59	1.27	2.07	1.18	1.14	1.34
MSTRG.2066.1	1.39	1.63	0.81	0.37	1.35	0.34	0	0	0.13
MSTRG.20694.2	0	0	0	0.51	1	0.73	0.54	0.22	0.62
MSTRG.2075.2	0.57	0.44	0.49	4.49	0.88	5.24	2.96	2.65	2.59
MSTRG.2075.3	1.52	0.65	0.3	4.63	8.52	5.89	9.11	11.86	4.06
MSTRG.20792.1	37.9	31.07	24.07	14.4	16.6	14.48	15.6	25.92	13.05
MSTRG.20804.1	11.65	12.27	14.95	6.42	5.22	4.34	10.12	3.75	7.4
MSTRG.20917.1	1.04	0.77	0.15	1.2	2.43	1.83	1.63	1.66	1.49
MSTRG.21030.1	2.67	2.71	3.67	2.08	0.68	0.98	0.4	0.52	0.89
MSTRG.21035.1	4.16	4.62	5.06	1.62	2.11	2.21	2.11	2.72	3.09
MSTRG.21038.2	13.25	11.55	8.56	2.04	4.87	4.33	8.37	3.6	6.22
MSTRG.21077.2	3.15	2.71	3.2	1.66	1.79	1.96	1.42	1.42	1.67
MSTRG.21120.1	4.42	4.53	3.72	1.59	2.24	1.67	1.81	2.22	2.3
MSTRG.21259.5	3.59	3.16	2.83	1.57	1.25	1.73	1.29	1.47	1.62
MSTRG.21272.1	67.43	89.98	71.24	15	18.45	17.06	19.61	17.66	19.49
MSTRG.21282.2	2.18	3.14	2.24	0.44	0.5	1.03	0.23	0.13	0.47
MSTRG.2137.1	0.23	0.06	0.14	1.7	1.44	2.02	1.21	1.76	1.46
MSTRG.21441.2	2.57	2.51	2.74	1.29	0.74	1.02	0.82	1.03	1.03
MSTRG.21441.3	1.18	1.59	1.87	0.51	0.71	0.72	0.29	0.25	0.74
MSTRG.21441.4	2.23	3.17	3.47	0.49	0.22	1.33	0.96	0.43	0.22
MSTRG.21483.1	3.09	3.28	1.51	0.07	0.17	0.09	0.14	0.15	0.13
MSTRG.21723.1	2.11	0.99	1.09	0.14	0.2	0.11	0.1	0.23	0.17
MSTRG.21724.1	2.97	1.51	1.09	0.25	0.29	0.14	0.12	0.41	0.11
MSTRG.21853.1	3.25	3.32	3.08	1.66	1.28	1.49	1.32	1.61	1.64
MSTRG.21853.2	0.21	0.11	0.17	0.12	0.28	0.27	0	0	0
MSTRG.21876.1	1.35	1.15	1.65	0.56	0.54	0.47	0.52	0.53	0.53
MSTRG.21953.1	1.54	1.58	0.95	2.02	0.72	0.19	0	0	0
MSTRG.22042.1	1.79	1.11	1.56	0.7	0.53	0.79	0.5	0.72	0.56
MSTRG.2205.1	19.21	32.15	27.9	10.99	8.54	13.07	23.08	21.8	14.23
MSTRG.22069.1	0.52	1.74	0.16	33.68	17.98	27.08	9.59	14.28	13.82
MSTRG.22088.3	1.17	1.87	1.81	3.54	3.96	4.67	3.39	2.33	2.64
MSTRG.22123.2	8.42	9.97	9.14	3.04	2.46	3.11	3.53	3.89	6
MSTRG.22153.1	0.42	0.47	0.13	1.17	0.69	1.97	2.05	0.78	2.51
MSTRG.22219.3	1.08	0.45	0.93	0	0	0	0	0	0
MSTRG.2230.2	2.07	0.86	1.45	5.74	0.71	5.43	2.98	4.27	5.53
MSTRG.22350.1	0.51	1.2	0.69	2.11	1.17	2.8	2.76	1.57	3.61
MSTRG.22361.1	0.2	0.23	0.13	0.39	1	0.68	0.72	0.63	1.24
MSTRG.22544.1	2.02	3.13	2.25	18.77	19.99	20.11	9.65	6.69	16.24
MSTRG.2257.2	2.09	1.91	2.08	0.98	0.98	1.09	0.97	0.95	0.89
MSTRG.22706.3	6.2	6.87	6.4	2.39	2.5	3.35	2.63	2.55	2.89
MSTRG.22744.1	0.08	0.22	0.2	0.81	0	1.37	0.38	0.73	0.88
MSTRG.22751.1	0.21	0.23	0.51	0.1	0.03	0.86	1.1	2.13	1.4
MSTRG.22772.1	861.57	1699.76	1833.93	610.43	563.81	628.9	1384.48	1084.01	661
MSTRG.22773.1	38.25	77.6	76.17	35.71	26.11	27.72	55.25	51.32	28.57
MSTRG.22844.1	287.53	279.29	265.97	125.97	123.91	148.59	126.85	115.95	183.85
MSTRG.22857.1	6.75	19.49	24.15	3.68	4.89	4.38	5.06	9.13	2.63
MSTRG.22868.1	4.48	3.82	0.97	0.29	0.52	0	0.97	2.48	0.16
MSTRG.22908.1	1.03	0.94	1.07	0.28	0.25	0.29	0.21	0.24	0.29
MSTRG.22966.1	14.94	14.64	11.21	23.12	28.38	25.92	36.97	34.91	25.19
MSTRG.22987.2	3.93	2.82	4.79	0.48	0.95	0	0.1	0.7	0.67
MSTRG.23056.1	51.79	179.94	33.87	327.37	135.16	263.2	479.27	350.35	434.27
MSTRG.23058.1	1.28	2.08	0.71	6.66	2.53	4.43	7.47	8.67	7.1
MSTRG.23071.2	32.02	37.66	47.43	16.08	13.65	17.08	17.95	13.16	17.76
MSTRG.23079.1	13.05	13.6	15.96	5.12	6.66	7.5	7.02	7.69	6.5
MSTRG.23081.2	5.94	5.52	5.63	2.22	2.37	2.75	2.01	1.95	2.58
MSTRG.23091.1	0	0	0.97	0	0	0	0.59	0.85	1.11
MSTRG.23149.1	24.57	30.2	29.68	28.01	28.2	44.02	50.67	90.35	42.82
MSTRG.23150.1	0.44	0.77	0.82	2.22	1.83	1.94	2.2	3.78	2.54
MSTRG.23163.4	2.17	2.64	2.97	0.99	0.3	1.39	0.71	0.56	0.7
MSTRG.23212.1	6.59	6.86	4.5	65.22	69.32	72.43	51.99	64.58	58.73
MSTRG.23228.2	18.39	21.51	30.82	9.58	7.57	9.65	12.98	10.63	18.03
MSTRG.23259.1	457.54	818.69	896.28	282.29	317.04	399.93	601.16	531.52	425.05
MSTRG.23481.1	6.78	6.33	8.18	4.76	4.23	4.44	3.35	3.64	3.34
MSTRG.23511.1	2.99	2.33	1.96	12.75	9.88	12.94	7.79	10.22	9.19
MSTRG.23512.1	0.6	0.86	0.09	1.57	1.75	2.49	1.64	1.98	1.62
MSTRG.23513.1	0.66	1	0.64	3.69	1.39	2.23	2.92	2.24	3.54
MSTRG.23616.1	2.35	3.02	2.09	0.45	1.02	0.67	0.41	0.33	0.82
MSTRG.23701.2	1.15	0.56	1.09	0.71	0.37	1.27	0.1	0.1	0.1
MSTRG.2382.2	0.47	1.23	0.37	1.98	2.14	2.55	1.2	1.45	2.87
MSTRG.23829.1	0.47	0.2	0.22	1.97	0.64	1.34	0.83	1.27	1.77
MSTRG.23863.1	33.08	33.86	34.7	6.66	6.82	14.09	6.72	9.17	10.05
MSTRG.23989.1	0.17	0.38	1.13	0.38	0.33	0.57	1.75	1.44	1.36
MSTRG.23996.2	0.89	0.45	1.59	1.15	1.16	1.71	3.06	2.09	1.98
MSTRG.24000.4	0.81	1.22	0.95	1.66	1.71	1.72	1.34	1.98	2.97
MSTRG.24000.6	0.14	0.17	0.62	0.89	0.9	0.66	0.68	0.97	0.59
MSTRG.24047.1	10.83	11.03	13.34	6.05	4.21	3.71	4.05	3.26	5.03
MSTRG.24130.4	12.76	16.06	24.42	32.83	50.14	38.62	32.32	31.3	19.57
MSTRG.24154.1	0.09	0.19	0.1	1.06	1.49	1.67	2.2	1.74	0.89
MSTRG.24164.3	1.97	2.19	2.13	0.83	1.04	0.86	1.01	0.63	1.02
MSTRG.24262.1	1.57	1.1	1.59	5.54	2.02	6.01	3.36	3.21	4.56
MSTRG.24263.1	0	0	0.49	4.55	6.48	1.64	1.39	1.05	1.38
MSTRG.24265.1	1.85	2.11	2.27	10.17	8.29	7.59	6.04	6.33	5.84
MSTRG.24334.5	1.07	1.59	1.05	0.5	0.33	0.36	0.54	0.82	0.63
MSTRG.24395.1	0.64	0.23	0.35	3.48	2.17	2.89	1.25	1.15	1.34
MSTRG.2446.2	2.1	1.37	2.06	0	0.06	0	0.06	0	0.09
MSTRG.2447.1	238.43	231.81	209.71	6.27	6.53	4.82	5.47	11.31	4.66
MSTRG.24487.4	0.35	0.6	1.13	6.04	4.87	7.95	3.1	3.64	4.74
MSTRG.2450.1	3.23	4.89	3.61	1.85	0.94	1.11	0.76	1.46	1.16
MSTRG.24502.1	0.32	0.41	0	1.28	1.31	1.81	0.87	1.52	2.3
MSTRG.24515.2	1.02	0.24	0.68	1.75	1.12	1.66	1.81	1.28	2.68
MSTRG.24683.2	0.98	0.56	0.75	2.58	1.74	2.78	0.57	1.94	1.13
MSTRG.24788.1	3.03	2.33	2.48	0.97	1.05	0.93	0.87	1.29	1.45
MSTRG.24835.1	1.43	1.8	1.94	1.01	0.58	0.87	0.36	0.61	0.77
MSTRG.24843.1	1.69	1.89	1.13	0.98	0.55	0.51	0.52	0.54	0.72
MSTRG.24855.2	2	1.83	1.94	1.13	1.18	1.03	0.71	0.82	1.09
MSTRG.24866.1	0.27	0.18	0.22	0.89	1.14	1.34	0.83	1.24	1.58
MSTRG.249.1	1.28	1.02	0	10.3	9.95	9.6	8.12	14.69	10.34
MSTRG.24930.1	1.87	2.19	1.92	0.62	0.62	0.31	0.46	0.05	0.85
MSTRG.24931.1	2.48	2.63	2.24	1.02	0.53	0.86	0.6	0.63	1.05
MSTRG.24932.1	2.14	2.33	2.07	1.15	0.79	1.12	0.7	0.74	1.17
MSTRG.24994.6	2.4	2.16	2.18	1.07	1.25	1.02	0.88	0.89	1.25
MSTRG.25033.1	8.36	6.52	6.38	6.78	3.26	3.25	0.92	1.96	1.64
MSTRG.25057.1	5.18	5.61	5.7	2.53	3.3	2.75	2.2	2.42	2.8
MSTRG.25077.3	4.87	2.01	6.02	10.12	4.94	24.08	24.82	8.12	13.75
MSTRG.25077.5	0	0.49	0	1.51	2.35	13.51	1.4	0	10.44
MSTRG.25078.1	0.17	0	0	1.2	0.27	2.5	0.98	0.95	1.26
MSTRG.25096.1	0.7	0.67	0.68	2.11	1.36	1.87	0.85	1.01	2.08
MSTRG.25111.1	32.62	37.55	26.25	15.71	16	17.63	13.08	13	18.76
MSTRG.25120.1	0.75	0.53	0.58	1.73	1.51	1.49	2.28	0.66	1
MSTRG.25239.1	3.94	3.23	3.54	8.28	7.47	9	9.44	12.87	7.85
MSTRG.25297.1	0.78	3.15	1.91	27.84	17.58	0.85	0.63	3.69	0.95
MSTRG.25300.5	1.17	2.21	5.95	0.38	0	0.83	2.81	1.85	0.93
MSTRG.25319.1	2.32	3.36	1.53	0	0	0.15	0.51	0.58	1.49
MSTRG.25371.1	0.15	0.08	0.68	1.06	0.44	1.94	1.47	0.79	1.66
MSTRG.25409.1	0.06	0.07	0	0.6	0.34	0.9	0.51	0.28	0
MSTRG.25409.2	0	0	0.08	1.12	0.37	0.43	0.16	0.55	0.48
MSTRG.25434.2	300.74	462.02	486.06	44.11	65.56	64.14	59.3	35.42	34.34
MSTRG.25435.1	9.95	9.14	15.74	1.66	2.48	3.04	0.44	1.28	0.3
MSTRG.25435.2	3.47	4.83	3.5	0.27	0	0	0.45	0.24	0.58
MSTRG.25436.1	12.4	4.96	6.91	0.38	0.53	0.41	0.09	0.27	0.38
MSTRG.25483.1	0.3	0	0.28	1.4	0.59	0	3.63	28.89	0.27
MSTRG.25492.2	0.43	0.32	0.24	1.54	0.64	1.69	0.89	0.41	1.68
MSTRG.25578.1	5.07	5.03	4.45	1.62	1.3	1.63	1.77	1.83	1.98
MSTRG.25582.2	4.83	3.52	2.75	2.01	2.32	1.32	0.75	1.31	0.95
MSTRG.25616.1	2.33	1.28	3.05	6.17	6.36	9.33	5.9	8.09	5.69
MSTRG.25629.14	3.89	3.83	3.85	1.22	1.48	1.31	0.87	0.83	1.47
MSTRG.25629.15	2.37	2.2	1.43	0.93	0.77	0.44	0.63	0.35	0.63
MSTRG.25634.1	2.07	2.07	2.14	0.92	0.5	0.59	0.46	0.58	0.68
MSTRG.25635.1	2.62	3.31	2.88	1.26	0.74	1.04	0.74	0.71	1.08
MSTRG.25815.1	3.15	3.01	2.81	3	3.39	3.87	1.26	1.01	1.84
MSTRG.25919.6	1.29	1.89	2.39	1.07	0.7	0.95	0.39	0.8	0.69
MSTRG.25969.1	0.16	0.4	0.44	0.83	1.25	0.9	0.88	0.67	1.69
MSTRG.2604.1	1.73	1.14	1.21	0.86	0.6	0.56	0.26	0.55	0.55
MSTRG.26178.1	1.26	0.74	0.49	2.24	2.19	1.74	1.62	2.66	1.37
MSTRG.26208.7	11.23	11.73	16.25	4.11	2.45	5.55	4.18	4.26	6.02
MSTRG.26304.1	51.97	62.96	58.71	25.33	16.42	21.66	28.37	25.08	27.89
MSTRG.2648.2	2.06	4.19	4.79	8.14	10.54	7.22	4.96	6.33	10.29
MSTRG.26489.1	0	0	0	1.69	0.44	0.42	0	0	0
MSTRG.26500.1	426.62	413.37	651.1	379.07	244.8	246.56	281.82	214.01	215.67
MSTRG.26514.2	2.21	3.7	5.69	2.95	2.04	4.89	7.75	8.63	8.92
MSTRG.26632.1	3.73	3.53	3.95	18.18	5.72	14.55	11.17	10.68	13.63
MSTRG.26657.1	13.27	11.12	14.09	5.77	4.64	5.74	9.01	8.18	8.89
MSTRG.26684.1	0.58	0.65	1.79	2.09	3.49	4.96	2.9	4.62	2.36
MSTRG.2669.1	2.93	2.96	2.14	1.19	0.93	0.98	1.2	1.51	0.91
MSTRG.26781.1	0.28	0.39	0.43	1.73	1.52	0.79	1.06	2.05	0.81
MSTRG.26785.1	0.54	1.35	0.99	15.07	12.13	15.84	5.66	5.93	2.71
MSTRG.26787.1	0.79	0.84	0.63	5.26	4.78	5.71	2.78	4.08	2.7
MSTRG.26788.1	0	0	0	2.34	1.56	0.59	0.67	0.33	0.33
MSTRG.26812.4	4.31	7.56	8.24	1.99	1.46	2.08	3.47	3.73	4.73
MSTRG.26848.2	0.38	0	0.08	5.02	2.9	4.2	0.18	1.29	1.92
MSTRG.26848.3	0.72	0.66	1.76	6.56	9.79	9.96	1.09	5.82	1.84
MSTRG.26987.1	1.14	1.14	1.53	4.23	3.46	2.11	1.99	2.31	2.62
MSTRG.26998.1	0.36	0.2	0.29	0.72	0.06	0.59	1.4	0.71	1.14
MSTRG.27077.1	13.7	38.85	44.34	10.53	12.25	12.87	8.06	10.28	10.65
MSTRG.27226.1	1.32	1.26	1.6	0.45	0.37	0.37	0.32	0.28	0.44
MSTRG.27226.2	1.09	1.75	1.26	0.25	0.46	0.4	0.97	0.9	0.76
MSTRG.27249.1	2.27	2.74	2.47	0.6	1.01	0.87	0.85	0.71	1.19
MSTRG.27260.1	1.27	1.93	4.28	8.58	13.66	15.1	20.24	92.33	7.84
MSTRG.27267.1	5.41	13.65	17.79	34.19	42.97	71.85	82.56	191.28	44.39
MSTRG.27267.2	0	0	0	2.51	0.38	0.83	3.69	3.63	0
MSTRG.27268.2	1.07	2.06	4.45	10.62	11.39	19.3	15.79	41.79	9.81
MSTRG.27498.1	0.26	0.29	0.88	1.75	1.07	0.88	1.15	1.63	1.81
MSTRG.27567.5	1.86	2.02	1.65	0.94	0.7	1.04	0.89	0.96	0.75
MSTRG.27596.2	129.16	101.14	139.12	263.62	297.01	263.39	222.3	220.8	230.91
MSTRG.27598.1	11.97	8.45	11.17	26.97	23.77	23.54	14.75	19.98	18.4
MSTRG.27714.1	2.23	1.15	1.16	6.32	1.87	5.31	7.04	3.7	8.63
MSTRG.27716.1	2.04	3.16	2.34	0.64	0.56	0.42	0.72	1.01	0.43
MSTRG.27716.2	2.2	2.63	2.99	0.49	0.34	0.63	0.61	0.7	0.64
MSTRG.27717.1	3.45	4.78	4.97	1.07	0.98	0.7	0.79	1.27	0.35
MSTRG.27773.1	3.65	2.94	2.8	2.09	1.78	1.5	1.34	1.51	1.6
MSTRG.27823.1	2.26	1.92	2.31	0.43	0.56	0.72	0.61	0.56	0.55
MSTRG.27825.2	0.25	0	0.4	1.04	0.87	2.37	1.13	1.52	2.72
MSTRG.27906.1	14.26	14.99	15.52	9.92	7.72	10.09	6.12	5.92	8.09
MSTRG.27980.1	0.16	0.18	0	0.86	0.58	0.77	0.5	0.48	0.68
MSTRG.28017.1	2.3	2.11	1.79	0.82	0.8	1.28	0.64	1.06	0.88
MSTRG.28023.1	1.76	1.36	3.07	0.58	0.22	0.77	1.82	13.48	1.48
MSTRG.28031.1	2.11	0.92	0.68	3.66	3.27	2.78	2.65	3.88	3.04
MSTRG.28077.1	2.11	1.83	2.59	5.47	2.15	6.03	4.46	4.86	7.08
MSTRG.28164.1	1.21	2.37	1.72	6.94	4.17	4.55	0.73	0.78	1.3
MSTRG.28253.4	2.24	2	2.15	0.92	0.49	0.64	0.59	0.59	0.83
MSTRG.28272.1	5.21	5.78	5.62	16.8	11.15	11.33	8.32	7.98	11.34
MSTRG.28277.1	0.19	0.3	0.18	5.51	2.74	2.48	1.96	2.01	1.79
MSTRG.28277.2	0.43	0.47	0.49	3.4	3.37	1.94	1.9	2.91	2.56
MSTRG.28277.3	0.9	1.52	1.58	5.01	2.2	2.33	2.21	1.84	3.18
MSTRG.28387.1	0.94	0.98	0.84	0.92	0.37	0.33	0.18	0.22	0.25
MSTRG.28461.2	3.28	3.49	2.78	1.99	1.69	1.6	1.53	1.18	1.05
MSTRG.28553.3	1.82	3.37	1.08	0.07	1.13	0.76	0.29	0.18	0.55
MSTRG.28591.1	23.09	23.4	29.47	8.87	7.97	8.43	8.85	7.89	9.73
MSTRG.2861.1	11.77	10.49	11.48	4.61	4.95	4.8	3.4	3.36	4.97
MSTRG.28736.1	9.88	12.97	11.06	2.11	1.25	4.65	4.15	6.84	3.65
MSTRG.28834.1	0	0.01	0.13	0.07	0.12	0.17	0.88	0.31	0.87
MSTRG.28838.1	0.15	0.42	0	1	0.25	1.08	0.88	1.45	1.21
MSTRG.28839.1	0.17	0.06	0	0.6	0	0.82	1.26	0.58	0.52
MSTRG.29226.1	2.54	2.31	1.09	0.76	0.46	0.19	0.66	0.96	0.27
MSTRG.29318.1	0	0.52	0.07	1.09	0.26	1.67	1.33	1.35	0.91
MSTRG.29370.1	0.66	0.57	0.27	1.19	2.07	1.58	0.43	0.99	1.52
MSTRG.29422.2	39.54	35.3	46.01	9.93	11.11	10.86	12.51	15.47	7.97
MSTRG.29606.1	37.82	30.5	33.16	138.77	192.67	125.9	154.65	124.72	107.58
MSTRG.2965.2	3.29	2.95	4.25	1.53	1.86	1.72	1.57	2.53	2.62
MSTRG.29650.2	0.11	0.43	0.67	1.46	1.07	1.69	0.9	1.42	1.52
MSTRG.29679.2	0.34	3.15	5.59	2.92	1.55	3.59	8.97	7.8	9.67
MSTRG.2970.1	0.2	0.57	0.19	2.52	1.72	1.87	1.43	1.43	2
MSTRG.29744.1	10.92	5.26	13.79	0.48	0.27	0	1.16	0.22	0
MSTRG.29822.3	1.27	1.28	1.27	0	0.13	0	0.27	0	0.13
MSTRG.29844.1	8.33	17.75	17.03	21.39	23.8	27.37	43.96	29.18	34.77
MSTRG.29845.1	4.25	9.39	5.89	18.79	16.89	14.27	22.8	19.55	22.5
MSTRG.29847.1	2.46	3.29	1.89	5.03	6.52	6.12	5.93	2.9	6.19
MSTRG.29938.1	84.53	211.36	132.27	7.44	8.28	8.71	19.45	23.71	16.9
MSTRG.29938.4	322.11	782.41	943.52	45.24	48.49	53.77	218.6	136.22	123.65
MSTRG.29938.5	0.77	0.65	1.32	0.11	0	0	0.1	0.16	0.06
MSTRG.29939.2	7.82	16.84	10.8	0.89	0.9	1.09	1.6	3.13	1.11
MSTRG.29939.3	16.85	33.76	50.92	1.76	3.55	3.87	10.86	10.75	7.14
MSTRG.29967.2	0	0	0	0	0	0	0.17	0.42	0
MSTRG.30093.2	1.38	0.6	0.3	0.08	0	0	0	0	0
MSTRG.30141.1	0.3	0.4	0.44	7.6	4.23	4.31	5.88	7.17	7.87
MSTRG.30146.4	0	0	0	0	0	2.81	1.42	0	0.9
MSTRG.3015.1	9.04	10.4	10.1	22.7	21.43	29.28	17.65	25.44	24.03
MSTRG.30155.1	25.59	35.15	24.82	8.34	6.91	8.69	6.39	20.78	15.58
MSTRG.30274.1	11.51	9.51	12.81	0.34	0.35	0.37	0.26	0.11	0.19
MSTRG.30292.2	0	0.51	0.41	1.07	0.18	0	1.09	3.46	0.7
MSTRG.30319.1	0.1	0.29	0.21	1.14	1.51	0.81	1.29	0.68	0.77
MSTRG.3053.2	1.42	2.19	1.7	0.85	0.59	0.38	0.43	0.45	0.69
MSTRG.3054.1	1.82	1.83	2.13	0.82	1.06	0.7	0.9	0.9	0.88
MSTRG.30680.1	0.1	1.01	0.25	2.79	1.09	1.76	2.47	1.48	2.32
MSTRG.30681.1	0.61	0.23	0.25	2.63	1.44	1.68	2.02	1.84	0.7
MSTRG.30685.1	0.37	1.34	0.74	3.87	4	5.02	12.99	8.83	11.08
MSTRG.30687.1	1.57	1.03	0.86	2.9	2.95	2.96	3.49	4.29	3.44
MSTRG.30688.1	0.76	0.97	1.69	1.7	1.38	2.13	1.44	3.65	2.18
MSTRG.30843.5	1.63	2.06	1.34	0.68	0.79	0.4	0.65	0.34	0.41
MSTRG.30851.1	1.2	1.13	1.54	0.74	0.67	0.68	0.53	0.42	0.48
MSTRG.30861.1	0.77	1.19	0.44	19.76	28.35	22.48	3.48	6.49	0.26
MSTRG.3090.1	0.31	0.34	0.84	1.76	1.61	1.31	0.36	1.5	0.97
MSTRG.31005.1	6.83	8.3	7.07	1.05	1.37	1.66	0.81	1.24	1.1
MSTRG.31094.1	6.03	7.92	6.92	2.05	1.8	1.82	2.02	3.03	2.48
MSTRG.31199.1	0.76	0.76	0.47	1.76	1.49	1.49	0.36	0.63	1.03
MSTRG.31275.1	0.72	0.62	0.57	0.84	1.6	2.17	2.32	1.81	1.25
MSTRG.31304.1	17.2	6.41	4.18	1.32	5.4	3.42	2.48	1.86	1.58
MSTRG.31311.1	0.45	1.3	0.59	1.97	2.68	1.44	2.4	2.22	1.32
MSTRG.31311.2	0.82	0.96	0.57	1.84	1.32	1.32	2.14	1.94	1.28
MSTRG.31427.1	0.28	0.35	0.34	0.91	0.99	0.96	1.25	0.85	1.25
MSTRG.31427.2	0.47	1.39	0.29	2.75	1.78	2.29	0.91	1.23	1.77
MSTRG.31550.1	2.51	2.18	1.65	1.08	0.91	0.97	0.65	1.21	1.22
MSTRG.31590.1	0.73	0.96	0.51	2.46	2.13	2.37	1.38	3.77	2.77
MSTRG.31600.3	0.95	0.7	0.81	0.43	0.3	0.42	0.16	0.12	0.19
MSTRG.31638.1	0.3	0.84	0.38	1.74	1.1	2.17	1.05	0.81	1.16
MSTRG.31702.1	0.08	0.19	1.75	7.14	3.38	2.77	5.29	1.71	1.84
MSTRG.31755.1	2.8	3.77	3.27	2.12	1.96	1.83	1.32	1.6	1.32
MSTRG.31761.1	7.13	23.9	4.48	54.24	22.61	53.3	102.92	44.58	58.91
MSTRG.31769.1	0.41	1.32	0.07	4.33	1.09	2.85	4.2	1.73	3.54
MSTRG.31782.2	17	26.47	22.51	2.67	3.93	4.84	4.59	3.31	6.04
MSTRG.31788.1	3.41	15.14	6.52	11.03	8.74	16.86	30.18	20.11	17.27
MSTRG.31911.1	0.4	1.3	0.38	4.81	1.95	2.94	4.16	2.96	4.23
MSTRG.31940.4	0.65	0	0.4	1.08	0.66	2.01	1.6	2.41	1.48
MSTRG.32013.1	2.76	2.92	2.68	5.22	5.72	6.07	4.29	3.82	4.28
MSTRG.32053.1	43.68	33.62	54.52	0.38	0.4	0.11	0	0	0.79
MSTRG.32056.1	16.56	32.13	30.77	1.75	1.46	2.51	2.99	3.45	4.64
MSTRG.32060.1	43.53	60.9	55.98	0.12	0.13	0	0.35	0.14	0.21
MSTRG.32064.1	110.87	87.74	261.26	0.65	1.19	1.96	0.45	1.04	1.26
MSTRG.32065.1	3.29	4.72	9.47	0	0	0	0	0	0.36
MSTRG.32068.1	3.17	2.26	1.94	0	0	0	0	0.16	0
MSTRG.32069.1	11.88	21.25	15.54	0.19	0	0.2	0	0.67	0
MSTRG.32167.2	3.9	4.29	1.82	0.69	0.03	0.93	0.46	0.07	0
MSTRG.32188.2	49.67	121.89	176.87	24.21	32.8	28.26	43.02	36.61	24.14
MSTRG.32194.1	2.03	5.4	6.87	0.84	1.23	1.17	0.44	1.43	0.44
MSTRG.32242.1	3.07	2.38	2.61	4.48	7.24	4.39	9.27	7.81	3.54
MSTRG.32265.2	7.37	5.4	3.44	22.09	22.05	24.15	13.52	16.32	16.96
MSTRG.32272.1	0.61	0.1	0.16	1.75	1.38	1.22	1.12	0.49	0.96
MSTRG.32361.3	0.36	0.08	0	1.18	0.95	1.49	2.04	1.97	2.34
MSTRG.32438.2	6.72	7.29	7.7	3.25	3.53	2.94	4.69	4.9	4.04
MSTRG.32459.1	0.72	2.66	1.84	6.61	7.43	5.19	3.7	4.85	8.6
MSTRG.32478.1	0.37	0.96	0.31	4.99	6.96	6.5	4.47	5.26	4.78
MSTRG.32482.1	0.98	1.56	1.18	0.53	0.41	0.37	0.51	0.33	0.59
MSTRG.32483.2	0.73	1.25	0.74	0.13	0.39	0.39	0.1	0.18	0
MSTRG.3249.1	0.46	1.22	1.29	0	0.09	0.04	0	0.04	0
MSTRG.32505.2	1.67	0.71	0.88	0	0.24	0.06	0.93	0.71	0.71
MSTRG.32628.2	0.65	0.84	0.66	1.74	1.47	1.28	0.88	1.16	1.53
MSTRG.32628.3	1.34	1.48	1.05	2.67	3.36	2.13	1.55	1.85	1.47
MSTRG.32628.5	0.47	0.8	0.7	1.72	1.29	1.15	1.33	1.27	0.69
MSTRG.32632.3	6.03	0	0.64	0	0	0	0	0	0.13
MSTRG.32652.1	2.62	1.73	4.78	6.29	1.83	7.41	9.2	6.93	5.82
MSTRG.32756.1	8.4	14.91	10.43	1.51	1.26	1.62	2.09	2.97	4.85
MSTRG.32758.2	4.12	9.34	3.46	24.62	25.01	26.1	25.83	24.63	18.75
MSTRG.32759.1	0.26	2.36	0.32	6.3	5.74	6.73	4.59	8.14	3.35
MSTRG.32766.1	1.29	1.47	1.32	0	0.11	0	0	0.03	0
MSTRG.32768.1	2.07	1.46	2	0	0	0	0	0	0
MSTRG.32770.1	9.54	13.91	9.96	1.17	2.85	1.51	1.8	0.74	1.9
MSTRG.32770.2	9.59	16.48	15.17	0.62	1.64	0	1.02	2.45	0.81
MSTRG.32774.1	8.06	15.82	17.26	0.33	0.45	0.57	0.99	0.55	1.26
MSTRG.32774.2	8.69	14.77	16.32	1.12	1.44	0	0.23	0.22	0.81
MSTRG.32781.1	16.86	3.5	6.63	2.33	1.66	2.56	0.46	0.4	0
MSTRG.32781.2	27.84	44.88	48.63	0.86	1.66	0	0.46	1.61	1.31
MSTRG.32786.1	8.32	15.36	11.97	2.42	2.56	4.29	2.12	5.94	5.22
MSTRG.32800.1	0.12	0.47	0.36	0.34	2.25	0.74	1.43	1.87	0.74
MSTRG.32811.1	14.09	43.24	12.67	6.24	5.32	2.19	8.16	6.24	14.73
MSTRG.32811.2	27.56	15.15	18.74	7.07	5.65	11.92	4.65	4.4	9.47
MSTRG.32816.1	2.21	1.58	0.81	5.96	3.95	4.22	3.85	5.85	5.47
MSTRG.32841.1	2.22	2.43	1.73	3.96	5.49	4.8	2.6	4.26	3.7
MSTRG.32965.1	1.2	2.62	1.47	3.05	4.19	3.84	6.05	4.43	4.72
MSTRG.32968.2	3.41	3.19	4.49	9.23	13.67	12.76	3.45	7	4.59
MSTRG.3297.1	1.14	1.98	1.55	0.28	0.08	0.27	1.08	0.68	0.47
MSTRG.33106.1	16.27	38.9	58.74	11.54	9.09	11.21	15.09	22.95	6.64
MSTRG.33119.3	1.58	2.11	2.34	0.35	0.75	0.4	0.57	0.31	0.97
MSTRG.33207.1	14.78	23.38	20.15	51.07	31.15	42.38	38.55	31.43	26.93
MSTRG.33279.1	24.3	17.35	12.4	1.54	3.1	2.54	2.33	1.99	2.25
MSTRG.33325.1	4.84	4.45	5.41	2.15	1.1	1.58	2.47	2.28	2.22
MSTRG.33488.1	1.33	1.26	0.42	1.93	2.9	2.68	1.76	3.06	2.76
MSTRG.33545.2	7.95	9.99	7.79	33.58	35.16	34.25	24.91	23.03	35.13
MSTRG.33573.1	5.5	5.82	3.93	4.23	5.47	5.57	1.51	2.05	3.35
MSTRG.33652.1	11.07	7.43	19.66	20.86	6.2	28.37	52.33	29.85	37.27
MSTRG.33709.1	0.15	0.77	0.85	5.13	5.31	5.54	3.91	5.39	4.03
MSTRG.33718.1	2.11	3.18	3.02	0.29	0.27	0.46	1	0.85	0.84
MSTRG.33736.2	2.85	4.11	2.7	0.98	1.77	0.94	1.79	2.36	1.83
MSTRG.33771.1	4.68	4.68	3.93	0	0	0	0	0.07	0
MSTRG.33772.1	15.18	10.38	7.13	0	0	0.08	0	0.09	0.09
MSTRG.33773.1	120.46	102.13	92.81	0.71	0.61	0.26	0.66	0.35	0.72
MSTRG.33815.3	0	0.35	0	0.74	0.65	1.35	0	0	1.01
MSTRG.33816.1	0.66	0.51	0.3	1.16	1.79	2.34	1.61	1.32	0.94
MSTRG.33855.2	17.1	16.26	14.71	1.04	0.9	0.99	2.69	1.73	0.96
MSTRG.33876.6	11.52	9.56	6.94	4.21	4.06	3.6	3.35	5.89	3.1
MSTRG.33882.1	0.58	0.65	0.32	1.46	1.67	1.09	0.62	1.26	1.4
MSTRG.33942.1	1.68	1.65	1.13	3.8	4.89	4.31	3.88	3.75	2.65
MSTRG.34108.2	1.73	2.77	1.87	8.25	9.32	9.48	6.58	5.25	7.68
MSTRG.34176.1	0.28	0	0	2.37	0.9	0.57	1.61	2.19	0.64
MSTRG.34229.1	10.02	7.39	5.9	0.15	0	0.08	0	0	0.09
MSTRG.34444.2	1.12	2.46	2.94	5.35	6.55	3.91	4.24	3.54	6.75
MSTRG.34473.3	495.62	520.58	609.45	58.95	84.51	82.31	49.23	49.79	32.04
MSTRG.34474.2	40.62	40.99	43.73	5.21	7.2	6.45	3.51	3.97	2.89
MSTRG.34503.1	16.12	18.38	18.61	9.94	9.03	9.52	7.26	9.72	8.23
MSTRG.3451.1	2.76	4.43	1.6	0.39	0	0.89	0.69	0.52	0
MSTRG.34550.1	1.37	1.2	0.58	2.47	2.13	2.4	1.27	1.9	1.16
MSTRG.34732.1	2.21	2.2	2.44	1.25	0.6	0.8	0.68	0.6	1.17
MSTRG.34815.1	2.96	14.43	1.08	14.29	12.48	5.86	25.91	17.96	13.32
MSTRG.34863.1	2.2	3.29	2.06	7.38	10.41	9.98	7.15	7.55	7.85
MSTRG.34874.1	22.65	18.41	26.77	5.45	5.89	4.91	5.03	6.66	5.98
MSTRG.34875.1	2.25	2.09	2.68	0.18	0.63	0.6	0.6	0.66	0.74
MSTRG.34897.5	2.43	1.48	0	22.52	28.5	28.07	11.62	15.99	11.2
MSTRG.34928.1	12.56	17.19	22.04	8	5.33	8.33	11	9.38	8.35
MSTRG.34954.2	11	19.8	22.54	7.19	6.83	8.06	10.97	10.95	9.8
MSTRG.34970.1	0.92	0.43	1.13	0	0	0.08	0	0	0.09
MSTRG.35195.1	3.71	4.05	1.62	4.07	2.95	3.77	7.19	8.14	3.82
MSTRG.35195.2	1.73	3.64	1.3	7.88	7.45	6.34	3.12	10.05	7.67
MSTRG.35241.1	5.79	2.14	3.79	1.15	1.1	1.15	1.81	2.17	1.13
MSTRG.35256.1	0.84	2.06	1.44	4.8	3.64	10.7	10.18	9.29	9.08
MSTRG.35259.2	0	0.72	0.6	2.12	1.59	1.28	2.28	2.14	1
MSTRG.35270.1	0	0	0.21	0.66	0.17	0.14	0.59	1	1.38
MSTRG.35270.4	0.35	1	0.47	2.15	1.8	2.51	2.29	1.45	1.13
MSTRG.35615.1	12.91	8.3	11.18	2.78	1.84	4.66	9.54	6.94	13.33
MSTRG.35615.2	1.98	1.38	1.72	3.23	4.04	2.64	2.8	3.27	4.67
MSTRG.35629.1	12.17	13.17	24.12	2.27	4.08	2.13	17.02	10.05	9.99
MSTRG.35687.8	0.29	0.62	0.69	2.28	1.15	3.34	0.48	1.56	0.95
MSTRG.35813.1	0.08	0.6	0.25	4.13	0.54	3.25	2.97	1.41	5.28
MSTRG.35876.2	1.1	0.8	1.18	0.19	0.17	0.62	0.12	0.34	0.17
MSTRG.35926.2	1.11	1.63	0.65	0	0	0	0	0	0
MSTRG.35970.1	2.04	2.98	1.04	3.58	2.73	3.64	3.71	5.79	3.62
MSTRG.36030.1	4.55	7.08	8.95	1.45	0.64	0.54	3.48	1.98	2.09
MSTRG.36031.1	172.81	349.68	341.95	23.8	13.64	28.33	91.06	80.08	71.34
MSTRG.36032.1	188.74	536.43	617.71	16.09	13.25	17.97	47.95	49.61	59.87
MSTRG.36033.1	4.46	8.43	9.97	0.49	0.41	0.63	1.04	1.12	1.36
MSTRG.36034.1	868.3	2615.65	3041.75	25.12	46.92	27.7	101.16	104.68	66.16
MSTRG.36035.1	13.54	39.45	38.31	0.32	0.63	0.5	1.36	1.97	2.12
MSTRG.3604.1	2.78	2.32	2.29	0.92	1.13	1.46	1.32	1.29	1.33
MSTRG.3604.3	4.72	2.73	4.81	2.14	1.62	1.63	1.18	2.65	1.22
MSTRG.36079.1	7.03	6.52	6.74	2.04	1.16	0.92	1.99	1.35	1.33
MSTRG.36087.1	10.55	9.79	8.23	0.07	0.23	0.33	0.06	0.18	0.12
MSTRG.36147.1	3.52	2.96	2.1	24.33	21.54	24.44	11.49	14.29	16.88
MSTRG.36154.1	0.22	0.8	0.4	3.58	1.26	1.87	2.25	1.82	1.2
MSTRG.36165.1	1.44	1.58	0.42	22.98	21.24	27.91	11.5	14.53	15.01
MSTRG.36195.1	0.92	0.94	1.47	3.51	1.54	3.19	2.86	2.8	2.32
MSTRG.36247.1	6.03	5.97	6.98	18.38	6.33	20.32	15.4	12.78	18.95
MSTRG.36257.1	115.05	61.62	38.92	1.48	2.17	1.9	1.12	0.84	0.94
MSTRG.36258.1	1.64	0.61	0.38	0.15	0	0	0	0	0
MSTRG.36277.2	2.39	6.69	1.35	19.57	7.27	16.25	21.83	11.86	21.4
MSTRG.36307.1	1.22	1.25	1.32	0.82	0.6	0.56	0.54	0.39	0.7
MSTRG.36368.1	3.39	1.79	1.88	11.41	11.74	11.34	6.68	8.83	8.36
MSTRG.36457.2	0.58	0.85	0.13	1.52	0.87	1.76	2.87	1.7	3.82
MSTRG.36482.1	1.16	1.24	1.72	0.68	0.7	0.38	0.37	0.5	0.4
MSTRG.3658.1	1.22	0.36	0.08	2.21	2.8	2.32	1.43	1.38	1.78
MSTRG.36687.2	0.32	0.06	0.39	2.41	1.05	0.22	1.69	0	0.06
MSTRG.36689.1	0.09	0.48	0.21	1.48	1.59	0.8	0.91	1.07	1.89
MSTRG.3669.1	1.95	3.23	1.88	3.91	4.1	6.2	1.41	1.18	1.1
MSTRG.36746.2	3.15	2.59	2.84	1.35	1.04	1.36	0.91	1.27	1.66
MSTRG.36775.1	7.12	10.34	11.37	1.55	1.92	2.64	3.91	2.96	2.35
MSTRG.36804.1	1.69	1.36	1.61	0.09	0	0.19	0.11	0.74	0.11
MSTRG.36859.1	0	0	0	1.49	0.68	0.68	0.83	3.61	1.57
MSTRG.36905.1	0.05	0	0	0.65	0	0.38	0.21	0.36	1.42
MSTRG.370.1	2.93	7.64	0.93	27.02	9.93	27.19	31.37	23.84	25.88
MSTRG.37149.1	0.48	0.12	0.21	2.08	2.15	2.49	2.31	2.54	2.79
MSTRG.37207.2	852.58	1165.78	1232.2	44.58	53.28	46.95	37.72	37.03	64.14
MSTRG.37208.3	37.28	57.5	57.19	2.51	2.27	3.78	1.44	2.48	2.67
MSTRG.37299.14	0	0	0	1.01	0	0.82	0.61	1.3	1.57
MSTRG.3731.1	5.1	4.25	4.06	2.14	1.46	1.8	1.35	1.54	1.86
MSTRG.37359.1	0.21	0.18	0.16	0.69	1.19	1.16	0.87	0.42	0.68
MSTRG.37425.2	5162	3226.03	2977.77	1650.11	1753.25	2267.25	2011.43	1397.59	1626.46
MSTRG.37426.1	21.76	33.08	23.44	13.59	11.38	23.6	8.66	10.92	15.09
MSTRG.37501.1	1.27	1.35	1.58	0.57	0.74	0.49	0.29	0.56	0.53
MSTRG.37537.6	1.45	0.79	0.97	0.13	0.29	0.33	0.38	0	0.27
MSTRG.3757.1	32.99	30.88	28.71	23.6	17.24	20.45	11.8	18.49	15.58
MSTRG.3765.1	4.01	4.15	4.29	2.22	1.63	1.82	1.54	1.81	1.8
MSTRG.37964.2	1.91	1.91	2.11	0.99	1.33	1.04	0.79	1.03	1.05
MSTRG.38021.1	0.85	0.65	0.84	4.31	3.64	3.39	3.23	4.26	2.88
MSTRG.38039.1	6.77	6.22	6.82	11.91	11.98	13.46	11.75	17.8	10.61
MSTRG.3820.1	2.74	3.13	3.09	1.43	1.84	1.37	1.17	1.42	1.35
MSTRG.3822.1	0.04	0	0	0.23	0.44	0.5	0.67	4.16	0.1
MSTRG.3823.1	1.29	1.85	2.42	0.48	0.54	0.66	0.39	0.46	0.65
MSTRG.38232.1	0.95	1.8	0.38	0	0	0	0	0	0
MSTRG.38275.2	44.73	37.64	39.85	22.23	20.2	19.48	16.56	20.14	17.52
MSTRG.38291.4	3.76	4.07	4.19	2.33	1.71	1.84	0.96	1.38	1.87
MSTRG.38291.5	12.94	12.3	14.11	3.31	2.19	2.53	2.22	2.31	2.62
MSTRG.38382.2	7.09	7.99	7.1	4.84	4.47	3.46	3	3.17	3.94
MSTRG.38445.1	0	0.19	0	0.58	1.5	2.31	2.72	1.17	1.09
MSTRG.38469.1	1.09	0.74	0.75	1.81	2.08	1.71	1.73	2.09	1.68
MSTRG.38472.2	0.76	0.32	0.56	0.63	0.78	0.69	1.03	2.64	1.99
MSTRG.38594.8	3.11	2.42	3.13	1.25	1.74	1.47	1.04	1.12	1.57
MSTRG.38594.9	5.56	3.63	5.2	2.38	2.32	4.05	1.44	2.21	1.78
MSTRG.386.2	1.35	0.37	0.71	0	0	0.43	0	0	0
MSTRG.38628.1	0.43	0.19	0.35	0.71	0.82	0.54	0.54	0	0
MSTRG.38645.1	0.33	0.07	0	4.08	1.07	0.47	1.43	0	0.15
MSTRG.38696.1	4.3	5.44	6.25	5.1	9.94	4.01	10.2	17.6	7.83
MSTRG.38770.1	9.77	12.3	10.74	6.65	4.95	5.74	3.83	2.9	6.59
MSTRG.39018.1	15.02	16.21	17.8	9.72	6.12	8.88	6.22	6.81	9.52
MSTRG.39026.1	3.68	2.49	3.36	0	0	0	0	0.13	0
MSTRG.39098.4	0	0	0.37	2.01	9.74	2.26	5.72	20.78	3.75
MSTRG.39151.1	1.79	2.07	2.42	0.62	0.56	0.41	0.34	1.1	0.75
MSTRG.39160.3	9.92	10.95	10.95	21.49	32.75	22.22	19.58	23.92	19.54
MSTRG.39215.1	1.12	1.2	1.12	0.28	0.47	0.32	0.32	0.28	0.33
MSTRG.39215.3	1.8	1.68	2.01	0.12	0.7	0.46	0.74	0.27	0.84
MSTRG.39271.1	1.92	2.15	1.79	0.87	0.95	0.96	0.67	0.79	1.06
MSTRG.39323.1	0.33	0.36	0.08	0.56	1.42	0.94	2.13	1.7	0.45
MSTRG.39332.1	2.22	3.27	3.64	0.99	1.21	0.95	1.56	2.35	1.07
MSTRG.39549.1	6.18	3.82	5.93	2.57	2.22	1.46	2.39	3.71	3.34
MSTRG.39602.1	4.14	1.91	2.07	0	0	0	0	0	0
MSTRG.39610.1	1.09	0.88	0.89	0.52	0.69	0.43	0.42	0.46	0.4
MSTRG.39618.1	1.6	1.5	1.28	0.76	0.72	0.64	0.57	0.48	0.73
MSTRG.39640.1	0.97	3.01	2.28	0.18	0.15	0	0.05	0	0.21
MSTRG.39666.3	0	0.54	0.32	1.27	0.54	1.04	0.15	0.03	0
MSTRG.3975.1	24.91	34.11	34.5	10.85	11.34	12.67	13.12	11.26	13.36
MSTRG.39767.1	3.82	2.65	2.41	7.42	4.16	7.94	6.03	6.49	6.89
MSTRG.39779.1	3.81	4.87	3.88	1.35	0.83	1.01	0.13	0	1.13
MSTRG.39804.1	3.2	1.67	2.5	0.82	0.74	0.29	1.69	1.05	0.65
MSTRG.39804.2	3.66	4.39	4.53	2.72	2.36	2.1	1.35	2	2.62
MSTRG.39805.4	17.37	15.48	23.76	8.18	8.85	7.99	9.72	8.08	11.15
MSTRG.39805.5	10.88	6.74	8.82	2.44	1.43	1.08	2.38	3.64	4.8
MSTRG.39829.1	1.95	3.36	1.49	0.4	0.11	0.22	0.12	0.06	0.43
MSTRG.39924.1	2.27	2.57	2.12	0.08	0.38	0.33	0.2	0.29	0.43
MSTRG.39925.1	1.45	1.74	0.62	0.48	0.18	0.34	0.13	0.13	0
MSTRG.39982.1	0.12	0.59	0.07	6.01	6.72	6.4	4.6	4.78	6.96
MSTRG.39995.1	0.41	0.42	1.06	7.6	8.16	10.97	11.01	12.27	14.2
MSTRG.4054.1	0	0	0.15	0.4	0.19	2.27	0.14	0.61	0.69
MSTRG.4193.1	0.38	0.73	0.69	2.61	3.44	2.48	1.23	3.58	2.75
MSTRG.4220.1	1.58	1.43	1.85	3.06	5.9	5.16	3.13	3.21	4.09
MSTRG.4304.1	0.63	0.71	1.18	0.54	0.22	0.38	0.2	0.15	0.3
MSTRG.4310.1	18.78	18.76	22.07	5.93	3.92	4.92	5.28	7.68	4.54
MSTRG.4344.3	0.83	2.02	0.93	2.85	1.68	3.3	1.09	1.54	0.97
MSTRG.4371.1	78.25	66.26	78.75	32.39	35.02	32.14	44.56	41.87	36.72
MSTRG.4393.1	0.56	4.51	2.97	1.52	3.66	0.46	8.72	5.19	8.42
MSTRG.4416.1	0.26	0.7	0.57	2.6	2.42	1.37	0.25	1.31	0.24
MSTRG.4465.1	19.72	26.35	12.12	99.72	69.32	74.58	79.18	120.71	85.04
MSTRG.4478.1	0.26	0.5	0.46	0.42	0.73	0.69	1.49	2.04	1.33
MSTRG.4573.1	0.17	0.29	0.1	0.85	0.99	1.81	0	0.94	0.84
MSTRG.4704.1	1.2	1.5	1.13	3.64	5.61	5.02	3.55	5.04	3.51
MSTRG.48.2	2.68	2.33	1.66	8.95	2.29	4.01	1.15	2.51	1.63
MSTRG.4870.1	1.93	2.29	1.65	0.11	0.13	0.12	0.07	0.2	0.27
MSTRG.4917.1	2.54	2.32	1.97	0.67	0.45	0.7	0.86	0.72	0.85
MSTRG.5015.1	1.86	3.41	2.43	6.77	5.95	5.77	4.41	4.81	6.68
MSTRG.5034.1	0.42	0.16	0.34	1.18	0.31	1.36	0.62	0.86	1.07
MSTRG.5073.1	1.62	1.95	1.48	0	0.03	0.11	0.09	0	0
MSTRG.5073.2	2.82	2.87	1.77	0	0	0.05	0	0.05	0
MSTRG.5103.1	0.58	0.51	0.45	2.8	0.58	1.32	2.6	0.61	3.47
MSTRG.5121.1	0.14	0	1.35	2.89	0.3	0.99	3.05	4.04	1.9
MSTRG.5140.1	1.34	1.16	3.07	0.33	0.33	0.49	1.11	0.88	0.9
MSTRG.53.1	15.12	18.97	21.82	7.72	9.18	7.42	8.97	7.98	10.93
MSTRG.530.3	5.45	3.91	9.1	0.86	0.32	0.77	1.66	0.85	1.02
MSTRG.5337.1	13.84	14.75	25.95	6.57	8.92	7.67	5.91	5.36	8.19
MSTRG.5417.1	3.19	0.93	1.96	5.1	3.25	10.08	10.55	8.25	7.05
MSTRG.5423.4	0.45	0.36	0.5	0.94	1.22	0.87	1.58	0.95	0.54
MSTRG.5522.1	1.05	0.93	1.19	0.5	0.42	0.43	0.42	0.52	0.61
MSTRG.5612.1	2.97	2.71	2.37	1.6	1.03	1.32	0.72	0.96	1.38
MSTRG.5684.2	3.18	4.31	2.31	0.85	0.57	0.86	1.05	0.56	1.32
MSTRG.5687.1	2.09	3.01	3.14	26.14	25.46	25.14	30.52	30.9	15.8
MSTRG.5688.1	0	0.26	0.72	3.59	3.96	3.75	1.1	2.39	2.44
MSTRG.5882.1	1.68	0.72	1.08	0	0	0	0.47	0.82	0.74
MSTRG.5920.2	27.82	432.89	105.53	1.91	1.4	1.05	4.16	2.57	3.15
MSTRG.5989.1	10.93	13.66	16.33	7.45	5.99	6.23	4.73	6.17	7.54
MSTRG.6031.1	3.23	1.41	1.48	0.05	0	0.17	0	0.06	0
MSTRG.611.1	4.12	4.61	3.27	1.01	1.42	1.45	1.77	1.82	1.51
MSTRG.6128.1	9.89	6.2	6.15	11.98	12.96	6.78	10.59	28.63	6.97
MSTRG.6146.1	1.26	3.35	0.82	0.08	0	0.38	0.27	0.24	0
MSTRG.6174.1	3.67	4.02	4.67	3.7	2.26	1.57	1.05	1.41	1.6
MSTRG.6175.1	5.58	4.56	5.68	1.97	1.82	1.47	1.66	2.06	1.63
MSTRG.6195.2	1.37	2.21	1.83	0.49	0.97	0.24	1.43	0.35	0.65
MSTRG.6195.3	0.8	1.13	1.23	0.42	0.41	0.45	0.7	0.71	0.38
MSTRG.6198.2	1.42	1.44	0.96	4.2	3.66	4.59	4.02	3.36	5.45
MSTRG.6210.1	2.63	1.98	4.51	5.71	3.93	8.06	7.15	6.02	9.33
MSTRG.6287.1	14.74	21.26	23.39	11.09	9.22	9.19	14.45	12.12	12.48
MSTRG.6296.1	22.26	35.36	22.89	12.4	11.64	13.55	11.79	16.28	15.38
MSTRG.6380.1	1.81	1.57	2.19	0.8	0.92	0.95	0.79	0.71	1.05
MSTRG.6383.1	2.54	1.77	2.41	1.11	0.87	0.76	0.98	1	0.99
MSTRG.659.1	1.61	0.63	0.59	0	0	0	0	0	0
MSTRG.6681.2	0.12	0	0	1.15	1.6	2.09	0.88	0.16	0.63
MSTRG.6875.1	4.05	3.95	5.4	1.5	1.55	2.13	2.79	1.77	3.73
MSTRG.6886.1	1.83	1.36	1.18	7.09	2.49	6.34	4.22	5.24	5.81
MSTRG.693.1	0.82	0.87	0.87	0.43	0.4	0.42	0.35	0.52	0.38
MSTRG.6971.3	1.48	0.86	1.16	0	0	0	0	0.38	0.68
MSTRG.7214.1	0.72	0.66	0.75	1.91	0.99	1.61	1.58	1.77	1.48
MSTRG.737.1	1.58	2.13	2.3	0.06	0.37	0.15	0.44	0.83	0.4
MSTRG.7455.2	8.69	10.02	8	3.84	3.71	3.39	6.76	3.96	8.87
MSTRG.7675.1	2.65	4.21	2.12	13.15	15.78	16.15	11.62	11.25	11.83
MSTRG.7810.1	5.24	6.57	6.58	14.74	5.32	20.5	25.67	16.16	18.44
MSTRG.7857.2	6.65	6.12	10.03	19	8.5	32.76	26.52	20.16	25.3
MSTRG.795.1	0.72	3.68	0.9	7.9	7.76	6.35	3.51	5.66	6.09
MSTRG.795.2	1	4.01	2.77	16.58	15.23	6.29	5.68	8.23	10.91
MSTRG.795.3	0.19	0.23	0.46	5.23	7.15	1.92	0.55	1.61	3.96
MSTRG.8003.1	1.34	1.98	2.93	0.64	0.87	0.83	0.8	0.79	1.08
MSTRG.802.5	1.79	2.1	1.4	0.97	0.76	0.82	1.25	0.66	1.2
MSTRG.8109.1	39.32	54.54	69.82	13.97	20.17	24.72	46.5	41.62	33.64
MSTRG.815.1	4.35	5.68	25.04	24.61	16.76	42.9	48.14	248.72	25.56
MSTRG.8198.1	58.99	63.67	44.04	25.72	29.09	22.54	26.17	27.58	25.35
MSTRG.821.1	8.82	18.07	28.83	39.11	41.72	81.44	128.31	175.87	50.13
MSTRG.8212.1	0.38	1.22	1.41	1.62	1.79	3.39	3.14	2.05	1.9
MSTRG.8241.1	0	0	0	0.87	0.4	1.87	0.43	0.21	1.78
MSTRG.8257.1	116.7	115.3	136.27	46.65	42.27	51.48	65.88	60.33	53.47
MSTRG.8292.1	4.52	3.35	4.79	1.16	0.21	1.42	2.82	0.87	2.03
MSTRG.8295.1	95.12	118.21	98.38	1.91	0.43	1.1	1.09	1.51	0.92
MSTRG.8328.3	5.11	5.13	5.59	1.78	1.35	1.83	2.68	1.13	1.29
MSTRG.8328.4	2.1	4.66	3.1	0.72	0.73	0.31	1.78	1.48	1.02
MSTRG.833.2	18.2	18.35	13.13	5.55	6.18	4.98	4.86	6.83	5.3
MSTRG.8337.1	1.3	1.73	2.37	0.49	0.04	0.3	0.74	0.83	0.38
MSTRG.8353.7	1.5	2.51	1.24	4.92	5.11	3.4	7.09	8.91	4.24
MSTRG.8428.1	52.93	77.13	90.66	26.03	21.72	23.14	31.73	27.53	30.74
MSTRG.8446.1	4.33	8.49	4.32	3.74	9.88	14.38	0.58	1.62	0.94
MSTRG.8569.3	39.59	31.61	24.99	2.21	0	5.66	5.2	7.32	6.18
MSTRG.8569.4	17.85	17.25	19.48	3.13	4.63	1.5	2.19	1.42	2.47
MSTRG.8615.1	0.91	1.85	1.56	6.27	1.73	3.14	3.32	1.31	1.25
MSTRG.8642.1	0	0.13	0	0.2	0.61	0.46	0.8	0.4	0.99
MSTRG.8705.3	2.71	4.58	2.24	0.86	0.69	0.12	1.39	1.79	1.17
MSTRG.8820.1	5.53	7.63	6	2.38	2.16	2.19	2.59	2.09	2.72
MSTRG.8866.1	1.1	0.34	0.51	0.07	0.04	0	0	0.09	0.13
MSTRG.8897.1	0.78	0.85	0.1	1.4	0.64	0.62	2.74	1.52	2.29
MSTRG.8922.1	1.32	1.66	0.71	4.27	2.61	2.39	1.36	1.78	1.24
MSTRG.9012.1	4.24	2.68	5.88	0	0	0.06	0	0.14	0
MSTRG.9012.2	3.28	2.23	6.32	0	0	0	0	0.07	0
MSTRG.9013.1	4.26	3.83	18.17	33.23	30.31	37.78	24.28	27.46	23.43
MSTRG.9014.1	0.19	0.32	1.61	3.23	3.89	3	1.65	3.41	2.5
MSTRG.9056.5	0.5	0.92	0.51	4.19	2.21	3.5	4.16	2.34	0.96
MSTRG.9233.3	0	0	0	1.6	1.94	0	0	0	0
MSTRG.9263.1	0.77	1.07	1	0.27	0.23	0.26	0.18	0.23	0.53
MSTRG.9437.1	0.58	0.05	0.83	1.3	0.63	0.55	2.15	1.48	3.13
MSTRG.9472.1	2.68	3.2	3.21	0.57	0.73	0.86	2.52	2.8	1.89
MSTRG.9644.1	2.1	2.23	2.14	0.85	0.79	0.88	0.7	0.7	1.2
MSTRG.9698.2	7.96	8.56	8.53	24.95	26.61	28.76	24.94	22.32	21.72
MSTRG.9730.5	3.37	2.14	3.95	0.73	0.96	0.63	1.58	1.35	0.85
MSTRG.976.2	0.52	0.76	0.51	1.02	1.68	1.01	0.45	1.19	1.11
MSTRG.9798.1	0.39	0.46	0.43	1.12	0.94	1.25	0.55	1.18	0.7
MSTRG.9801.1	0.23	0.08	0.47	1.01	0.99	1.17	1.33	2.66	1.05
