# Supplementary material for: Interaction Analysis of lncRNA and mRNA Based on the Full-Length Transcriptome of the Nymph-to-Adult Developmental Transition of Sogatella furcifera
Source: Insects. 2023 Mar 23;14(4):308. doi: 10.3390/insects14040308 (PMC10141146; doi:10.3390/insects14040308)
Supplement: Supplementary file 1 [file insects-14-00308-s001.zip › Table S4. KEGGE analysis of differentially expressed mRNA.xls]

Table S4 KEGG analysis of differentially expressed mRNA
KEGG_A_class	KEGG_B_class	Pathway	bmimee (1395)	All (6457)	Pvalue	Qvalue	Pathway ID	Genes	K_IDs
Metabolism	Global and overview maps	Metabolic pathways	450	1615	2.83E-12	9.47E-10	ko01100	Sfur000047(AAEL008004);Sfur000110(Ppt2);Sfur000111(Arsb);Sfur000119(ELOVL4);Sfur000157(HAO1);Sfur000188(AAEL008004);Sfur000193(Pnliprp2);Sfur000207(HMGCS1);Sfur000240(HADHB);Sfur000252(Mal-B2);Sfur000262(Nnt);Sfur000268(AAEL008004);Sfur000273(AAEL008004);Sfur000300(Gmer);Sfur000301(AAEL008004);Sfur000315(Acy1);Sfur000330(D11DS);Sfur000337(AAEL008004);Sfur000343(Alg9);Sfur000347(NNT);Sfur000372(CT…	K10250+K01074+K01135+K10249+K11517+K10250+K14073+K01641+K07509+K01187+K00323+K10250+K10250+K02377+K10250+K14677+K00507+K10250+K03846+K00323+K01758+K14073+K10250+K00602+K00873+K03103+K01194+K01672+K01047+K00669+K01988+K22203+K22203+K05285+K01672+K16860+K05607+K03331+K03331+K18123+K00161+K22203+K11140+K02154+K01077+K01988+K01922+K01183+K13485+K11153+K00011+K01183+K01183+K01183+K00453+K12318+K18081+…
Metabolism	Lipid metabolism	Fatty acid elongation	29	41	2.01E-11	3.36E-09	ko00062	Sfur000047(AAEL008004);Sfur000110(Ppt2);Sfur000119(ELOVL4);Sfur000188(AAEL008004);Sfur000240(HADHB);Sfur000268(AAEL008004);Sfur000273(AAEL008004);Sfur000301(AAEL008004);Sfur000337(AAEL008004);Sfur000400(AAEL008004);Sfur001418(AAEL008004);Sfur001468(ELOVL4);Sfur002072(Ppt1);Sfur002488(Elovl7);Sfur002746(Hsd17b12);Sfur005244(ELOVL);Sfur005767(ACAA2);Sfur006731(ELOVL4);Sfur007538(hsd17b12);Sfur01146…	K10250+K01074+K10249+K10250+K07509+K10250+K10250+K10250+K10250+K10250+K10250+K10249+K01074+K10250+K10251+K10247+K07508+K10249+K10251+K10249+K10250+K10250+K10250+K10249+K10250+K10250+K07508+K10250+K07511
Metabolism	Carbohydrate metabolism	Amino sugar and nucleotide sugar metabolism	45	89	1.31E-09	1.46E-07	ko00520	Sfur000300(Gmer);Sfur001067(--);Sfur001256(--);Sfur001308(nrf-6);Sfur001356(nrf-6);Sfur001372(--);Sfur001403(nrf-6);Sfur001481(Oacyl);Sfur001520(CHIA);Sfur001556(--);Sfur001650(Oscillin);Sfur001670(fdl);Sfur001692(--);Sfur002041(Pgi);Sfur002233(HK1);Sfur004784(Gfpt2);Sfur006684(nrf-6);Sfur006894(Gnpnat);Sfur007226(--);Sfur007883(rhy-1);Sfur008450(Chia);Sfur008452(Chia);Sfur008604(chs-2);Sfur01070…	K02377+K01183+K01183+K01183+K01183+K01183+K01183+K01183+K01183+K01183+K02564+K12373+K01183+K01810+K00844+K00820+K01183+K00621+K01183+K01183+K01183+K01183+K00698+K01711+K00621+K01183+K08678+K01836+K15779+K01183+K01183+K01809+K01183+K01183+K00963+K21749+K01183+K01183+K00963+K01183+K01183+K01183+K00844+K00844+K02377
Genetic Information Processing	Replication and repair	DNA replication	26	46	2.40E-07	2.01E-05	ko03030	Sfur000070(pola1);Sfur000071(Mcm7);Sfur000145(Mcm7);Sfur000741(Mes4);Sfur001674(mtSSB);Sfur002315(dpa);Sfur003256(Rfc5);Sfur003370(lig1);Sfur005462(RpA-70);Sfur005880(PCNA);Sfur008184(DNApol-delta);Sfur008486(DNApol-alpha60);Sfur008919(--);Sfur009691(DNApol-delta);Sfur010285(POLE3);Sfur011216(Pole);Sfur011647(Mcm5);Sfur011884(RFC4);Sfur011933(POLE2);Sfur013322(Myg1);Sfur013773(Mcm3);Sfur015063(Mc…	K02320+K02210+K02210+K03506+K03111+K02212+K10756+K10747+K07466+K04802+K02327+K02685+K10745+K02327+K02326+K02324+K02209+K10755+K02325+K10754+K02541+K02540+K10744+K04799+K02542+K02542
Metabolism	Global and overview maps	Fatty acid metabolism	43	100	1.09E-06	7.29E-05	ko01212	Sfur000047(AAEL008004);Sfur000110(Ppt2);Sfur000119(ELOVL4);Sfur000188(AAEL008004);Sfur000240(HADHB);Sfur000268(AAEL008004);Sfur000273(AAEL008004);Sfur000301(AAEL008004);Sfur000330(D11DS);Sfur000337(AAEL008004);Sfur000400(AAEL008004);Sfur001418(AAEL008004);Sfur001468(ELOVL4);Sfur002072(Ppt1);Sfur002488(Elovl7);Sfur002528(Fasn);Sfur002746(Hsd17b12);Sfur005215(ACADS);Sfur005244(ELOVL);Sfur005767(ACA…	K10250+K01074+K10249+K10250+K07509+K10250+K10250+K10250+K00507+K10250+K10250+K10250+K10249+K01074+K10250+K00665+K10251+K00248+K10247+K07508+K10249+K00665+K10251+K11262+K08765+K10249+K10250+K10250+K10250+K00507+K00665+K01897+K00507+K00507+K00507+K00507+K10249+K22540+K10250+K10250+K07508+K10250+K07511
Metabolism	Lipid metabolism	Biosynthesis of unsaturated fatty acids	29	58	1.56E-06	8.70E-05	ko01040	Sfur000047(AAEL008004);Sfur000119(ELOVL4);Sfur000188(AAEL008004);Sfur000268(AAEL008004);Sfur000273(AAEL008004);Sfur000301(AAEL008004);Sfur000330(D11DS);Sfur000337(AAEL008004);Sfur000400(AAEL008004);Sfur001418(AAEL008004);Sfur001468(ELOVL4);Sfur002488(Elovl7);Sfur002746(Hsd17b12);Sfur005244(ELOVL);Sfur006731(ELOVL4);Sfur007538(hsd17b12);Sfur011462(Elovl1);Sfur011701(AAEL008004);Sfur011911(ELOVL4);…	K10250+K10249+K10250+K10250+K10250+K10250+K00507+K10250+K10250+K10250+K10249+K10250+K10251+K10247+K10249+K10251+K10249+K10250+K10250+K10250+K00507+K00507+K00507+K00507+K00507+K10249+K10250+K10250+K10250
Metabolism	Lipid metabolism	Glycerolipid metabolism	33	79	3.94E-05	1.88E-03	ko00561	Sfur000193(Pnliprp2);Sfur000398(PNLIPRP2);Sfur001205(AKR1B1);Sfur001415(Pnpla2);Sfur001643(NAGA);Sfur001890(PNLIP);Sfur001986(AKR1B8);Sfur002309(AKR1B8);Sfur002850(PNLIP);Sfur002974(PNLIP);Sfur003019(--);Sfur003979(PNLIPRP2);Sfur004571(--);Sfur009497(DGAT1);Sfur010070(Lip1);Sfur011683(MFSD10);Sfur011918(--);Sfur012014(--);Sfur012970(GPAM);Sfur013135(Aldh2);Sfur013672(LCLAT1);Sfur013911(PNLIP);Sfu…	K14073+K14073+K00011+K16816+K01189+K14075+K00002+K00002+K14076+K14073+K14075+K14073+K01080+K11155+K14452+K13506+K16816+K16816+K00629+K00128+K13513+K14073+K15728+K14073+K14073+K13509+K14073+K00863+K00863+K01080+K14074+K14074+K00128
Metabolism	Carbohydrate metabolism	Fructose and mannose metabolism	17	32	8.80E-05	3.68E-03	ko00051	Sfur000300(Gmer);Sfur001205(AKR1B1);Sfur002233(HK1);Sfur010701(Gmd);Sfur011572(enosf1);Sfur012384(Sord);Sfur012647(Pfkfb1);Sfur013438(Pfk);Sfur014564(MPI);Sfur015008(TKFC);Sfur015029(Ald1);Sfur015056(TKFC);Sfur015261(aldo-2);MSTRG.12820(ALDOB);MSTRG.25617(Hex-t2);MSTRG.3014(Hex-t2);MSTRG.613(TSTA3)	K02377+K00011+K00844+K01711+K18334+K00008+K01103+K00850+K01809+K00863+K01623+K00863+K01623+K01623+K00844+K00844+K02377
Metabolism	Metabolism of terpenoids and polyketides	Insect hormone biosynthesis	20	41	0.000102811	3.83E-03	ko00981	Sfur000511(--);Sfur001410(Est-6);Sfur001442(Ces2e);Sfur001475(Est-6);Sfur001617(Est-6);Sfur002078(jhamt);Sfur003804(sad);Sfur003828(phm);Sfur010134(EH2);Sfur010575(Cyp305a1);Sfur010874(Cyp303a1);Sfur011561(spo);Sfur012080(daf-36);Sfur013053(Dhrs11);Sfur013135(Aldh2);Sfur013403(DHRS11);Sfur014254(spo);Sfur014382(dib);MSTRG.22713(SAR2567);MSTRG.5712(aldA)	K15825+K01063+K01063+K01063+K01063+K10718+K10722+K10720+K10719+K14937+K14937+K14939+K14938+K15890+K00128+K15890+K14939+K10721+K15890+K00128
Metabolism	Lipid metabolism	Fatty acid degradation	24	54	0.000138963	4.66E-03	ko00071	Sfur000240(HADHB);Sfur002897(Eci2);Sfur005215(ACADS);Sfur005767(ACAA2);Sfur005894(ACP21);Sfur005937(--);Sfur005967(ACP20);Sfur005972(ACP20);Sfur006039(Ccp84Ab);Sfur006062(ACP20);Sfur006128(ACP21);Sfur006176(ACP21);Sfur010046(CPT1B);Sfur012982(Acsl1);Sfur013135(Aldh2);Sfur014404(ACP21);Sfur014594(Ccp84Ab);Sfur014800(ACP21);Sfur015119(Edg84A);Sfur015256(Edg84A);Sfur015309(ACP21);MSTRG.15727(ACAA2);…	K07509+K13239+K00248+K07508+K13238+K13238+K13238+K13238+K13238+K13238+K13238+K13238+K08765+K01897+K00128+K13238+K13238+K13238+K13238+K13238+K13238+K07508+K07511+K00128
Organismal Systems	Digestive system	Fat digestion and absorption	27	65	0.000218214	6.64E-03	ko04975	Sfur000193(Pnliprp2);Sfur000398(PNLIPRP2);Sfur000526(--);Sfur001001(SCARB1);Sfur001890(PNLIP);Sfur002974(PNLIP);Sfur003019(--);Sfur003100(pes);Sfur003362(--);Sfur003517(--);Sfur003979(PNLIPRP2);Sfur004571(--);Sfur005842(pes);Sfur007895(SCARB2);Sfur009497(DGAT1);Sfur010070(Lip1);Sfur010095(apolpp);Sfur013162(mttp);Sfur013911(PNLIP);Sfur014230(Pnliprp1);Sfur014232(Pnliprp1);Sfur014704(AGPAT1);Sfur0…	K14073+K14073+K01047+K13885+K14075+K14073+K14075+K13885+K01047+K13885+K14073+K01080+K13885+K13885+K11155+K14452+K14462+K14463+K14073+K14073+K14073+K13509+K14073+K01080+K14074+K14074+K13885
Metabolism	Carbohydrate metabolism	Galactose metabolism	18	37	0.000237675	6.64E-03	ko00052	Sfur000252(Mal-B2);Sfur001205(AKR1B1);Sfur001643(NAGA);Sfur002233(HK1);Sfur006887(Glb1);Sfur013438(Pfk);Sfur014064(PGM2);Sfur014540(GLB1);Sfur014743(UGP2);Sfur015411(Ugp2);MSTRG.13192(mro);MSTRG.1742(GLB1);MSTRG.25617(Hex-t2);MSTRG.2654(SI);MSTRG.3014(Hex-t2);MSTRG.30284(Gaa);MSTRG.3233(SI);MSTRG.3238(GAA)	K01187+K00011+K01189+K00844+K12309+K00850+K15779+K12309+K00963+K00963+K01785+K12309+K00844+K12316+K00844+K12316+K12316+K12316
Genetic Information Processing	Folding, sorting and degradation	Proteasome	19	41	0.000354724	9.14E-03	ko03050	Sfur001115(Psmd12);Sfur001192(Dox-A2);Sfur001473(--);Sfur002544(Psmb7);Sfur003933(PSMA6);Sfur004404(PSMA4);Sfur004788(Psmb2);Sfur005969(PSMC4);Sfur009256(PSMA7);Sfur009493(PSMB6);Sfur010237(PSMB1);Sfur011510(Rpt2);Sfur011797(psmc3-a);Sfur012816(PSMD2);Sfur013245(PSMD14);Sfur014778(Psma6);MSTRG.12125(PSMB5);MSTRG.13331(Psma1);MSTRG.24079(Prosalpha2)	K03035+K03033+K11599+K02739+K02730+K02728+K02734+K03063+K02731+K02738+K02732+K03062+K03065+K03028+K03030+K02730+K02737+K02725+K02726
Organismal Systems	Immune system	Complement and coagulation cascades	16	33	0.000551658	1.32E-02	ko04610	Sfur002145(PPAF2);Sfur004229(Eppin);Sfur006268(Ppn);Sfur007267(Klkb1);Sfur007344(flz);Sfur008378(--);Sfur011321(mas);Sfur011836(mas);Sfur013522(flz);Sfur014057(TMPRSS15);MSTRG.28022(Ppn);MSTRG.36866(F10);MSTRG.36868(OVCH2);MSTRG.4940(Tmprss11c);MSTRG.4941(ST14);MSTRG.5486(F10)	K01344+K03909+K03909+K01324+K01324+K01324+K01324+K01324+K01324+K01324+K03909+K01324+K01324+K01321+K01321+K01324
Cellular Processes	Transport and catabolism	Peroxisome	40	114	0.000590214	1.32E-02	ko04146	Sfur000157(HAO1);Sfur000712(PEX11G);Sfur001025(wat);Sfur001691(Pex16);Sfur001994(--);Sfur002862(Far1);Sfur002897(Eci2);Sfur003142(MVK);Sfur003182(SOD1);Sfur004002(Jafrac1);Sfur004407(XDH);Sfur004749(PEX11A);Sfur004988(XDH1);Sfur005844(--);Sfur006354(Jafrac1);Sfur006389(wat);Sfur006756(CG5065);Sfur006772(wat);Sfur006951(CG5065);Sfur006953(CG8306);Sfur007701(Jafrac1);Sfur007726(CG5065);Sfur008342(w…	K11517+K13353+K13356+K13335+K13356+K13356+K13239+K00869+K04565+K13279+K00106+K13352+K00106+K13356+K13279+K13356+K13356+K13356+K13356+K13356+K13279+K13356+K13356+K13356+K01796+K00624+K00106+K13273+K13356+K01796+K05940+K03781+K13356+K05676+K13356+K01640+K00031+K01897+K00106+K00106
Genetic Information Processing	Folding, sorting and degradation	Protein export	14	28	0.000828806	1.74E-02	ko03060	Sfur000867(SEC11A);Sfur000897(Srp19);Sfur001681(Spase22-23);Sfur005985(Sec63);Sfur005994(SEC61G);Sfur006380(SEC61A2);Sfur008193(spcs2);Sfur008961(SEC61B);Sfur009184(spcs2);Sfur009255(ZK512.4);Sfur011421(SRP72);Sfur012613(mblac1);MSTRG.34003(Hsc70-3);MSTRG.34004(Hsc70-3)	K13280+K03105+K12948+K09540+K07342+K10956+K12947+K09481+K12947+K03109+K03108+K12946+K09490+K09490
Genetic Information Processing	Folding, sorting and degradation	Protein processing in endoplasmic reticulum	52	162	0.001099898	2.17E-02	ko04141	Sfur000209(Uggt);Sfur000302(Hsp90b1);Sfur000392(Hsp90b1);Sfur000419(Calr);Sfur001151(PDIA3);Sfur001369(Plaa);Sfur001421(SSR3);Sfur002132(SSR1);Sfur002558(Pdi);Sfur003703(At1g06840);Sfur004777(TER94);Sfur004863(SEC24C);Sfur004918(PRKCSH);Sfur005031(Dad1);Sfur005057(DERL1);Sfur005571(Ssr2);Sfur005584(RLBP1);Sfur005985(Sec63);Sfur005994(SEC61G);Sfur006371(hyou1);Sfur006380(SEC61A2);Sfur006701(--);Sf…	K11718+K09487+K09487+K08057+K08056+K14018+K13251+K13249+K09580+K08852+K13525+K14007+K08288+K12668+K11519+K13250+K09586+K09540+K07342+K09486+K10956+K09586+K09586+K11718+K09586+K09586+K10080+K12666+K09481+K05546+K23741+K07151+K04571+K01228+K14005+K09584+K12667+K13984+K14010+K12666+K09054+K03283+K09054+K07151+K11718+K11718+K03283+K09490+K09490+K09586+K03283+K03283
Metabolism	Biosynthesis of other secondary metabolites	Caffeine metabolism	6	8	0.001879275	3.42E-02	ko00232	Sfur004407(XDH);Sfur004988(XDH1);Sfur008990(xdh);Sfur009447(Uro);Sfur012994(ry);Sfur013874(XDH)	K00106+K00106+K00106+K00365+K00106+K00106
Metabolism	Glycan biosynthesis and metabolism	Glycosaminoglycan degradation	14	30	0.001939562	3.42E-02	ko00531	Sfur000111(Arsb);Sfur001670(fdl);Sfur004459(SGSH);Sfur005197(Hgsnat);Sfur006887(Glb1);Sfur008174(Arsb);Sfur008374(ARSJ);Sfur009020(Arsb);Sfur009100(Arsb);Sfur009114(ARSI);Sfur010398(NAGLU);Sfur012780(HPSE);Sfur014540(GLB1);MSTRG.1742(GLB1)	K01135+K12373+K01565+K10532+K12309+K01135+K01135+K01135+K01135+K01135+K01205+K07964+K12309+K12309
Organismal Systems	Digestive system	Vitamin digestion and absorption	28	77	0.002056347	3.44E-02	ko04977	Sfur000193(Pnliprp2);Sfur000398(PNLIPRP2);Sfur001001(SCARB1);Sfur002974(PNLIP);Sfur003100(pes);Sfur003517(--);Sfur003979(PNLIPRP2);Sfur004713(PLB1);Sfur005328(SLC46A1);Sfur005329(PLB1);Sfur005568(PLB1);Sfur005842(pes);Sfur007895(SCARB2);Sfur008420(slc23a2);Sfur009985(abcG23);Sfur010095(apolpp);Sfur010215(abcG23);Sfur010345(abcG23);Sfur010548(abcG23);Sfur010905(abcG23);Sfur011825(vanin-like);Sfur0…	K14073+K14073+K13885+K14073+K13885+K13885+K14073+K14621+K14613+K14621+K14621+K13885+K13885+K14611+K05665+K14462+K05665+K05665+K05665+K05665+K01435+K05665+K05665+K14073+K14073+K14073+K14073+K13885
Metabolism	Carbohydrate metabolism	Starch and sucrose metabolism	17	41	0.003205365	5.11E-02	ko00500	Sfur000252(Mal-B2);Sfur000494(tre1);Sfur002027(TPS1);Sfur002041(Pgi);Sfur002233(HK1);Sfur005185(Gyg1);Sfur007891(Treh);Sfur011156(tpsA);Sfur014064(PGM2);Sfur014743(UGP2);Sfur015411(Ugp2);MSTRG.25617(Hex-t2);MSTRG.2654(SI);MSTRG.3014(Hex-t2);MSTRG.30284(Gaa);MSTRG.3233(SI);MSTRG.3238(GAA)	K01187+K01194+K16055+K01810+K00844+K00750+K01194+K16055+K15779+K00963+K00963+K00844+K12316+K00844+K12316+K12316+K12316
Genetic Information Processing	Replication and repair	Base excision repair	15	35	0.003784241	5.76E-02	ko03410	Sfur000067(Parp);Sfur000741(Mes4);Sfur002845(Xrcc1);Sfur003370(lig1);Sfur005880(PCNA);Sfur008184(DNApol-delta);Sfur009691(DNApol-delta);Sfur010285(POLE3);Sfur011216(Pole);Sfur011933(POLE2);Sfur012031(smug1);Sfur012496(Ung);Sfur015092(Rrp1);MSTRG.27247(Fen1);MSTRG.33856(Ogg1)	K24070+K03506+K10803+K10747+K04802+K02327+K02327+K02326+K02324+K02325+K10800+K03648+K10771+K04799+K03660
Metabolism	Lipid metabolism	Glycerophospholipid metabolism	26	74	0.004995325	7.28E-02	ko00564	Sfur000526(--);Sfur000531(mboat7);Sfur000649(Gpdh);Sfur000808(PLD3);Sfur003362(--);Sfur004571(--);Sfur004713(PLB1);Sfur004887(ETNPPL);Sfur005053(Taz);Sfur005329(PLB1);Sfur005568(PLB1);Sfur006218(CHKB);Sfur008634(--);Sfur008914(GPD2);Sfur010714(Pis);Sfur011683(MFSD10);Sfur012970(GPAM);Sfur013672(LCLAT1);Sfur014127(Lpin1);Sfur014595(sws);Sfur014704(AGPAT1);Sfur014886(sws);Sfur015387(sws);MSTRG.1334…	K01047+K13516+K00006+K16860+K01047+K01080+K14621+K14286+K13511+K14621+K14621+K14156+K01049+K00111+K00999+K13506+K00629+K13513+K15728+K14676+K13509+K14676+K14676+K00894+K00894+K01080
Organismal Systems	Immune system	Antigen processing and presentation	15	36	0.005214312	7.28E-02	ko04612	Sfur000419(Calr);Sfur001151(PDIA3);Sfur004779(ifi30);Sfur005885(cfaD);Sfur007067(TINAGL1);Sfur010354(GILT1);Sfur010772(ifi30);Sfur012583(ifi30);Sfur014756(Cp1);Sfur014816(Cp1);Sfur014836(Cp1);MSTRG.12076(Hsp68);MSTRG.32397(Hspa2);MSTRG.4355(HSP70B2);MSTRG.4356(HSP70B2)	K08057+K08056+K08059+K01365+K01363+K08059+K08059+K08059+K01365+K01365+K01365+K03283+K03283+K03283+K03283
Metabolism	Metabolism of other amino acids	Glutathione metabolism	21	57	0.005996553	8.04E-02	ko00480	Sfur000935(Trhde);Sfur002601(RnrS);Sfur003730(Ggt1);Sfur005336(GstS1);Sfur005404(Rrm1);Sfur005578(Gpx6);Sfur005641(LAP3);Sfur006110(lap3);Sfur006841(PTGES);Sfur008774(LAP3);Sfur009105(LAP3);Sfur012117(--);Sfur012202(Ggt7);Sfur012644(lap3);Sfur012700(Idh1);Sfur014216(GST1);Sfur014260(lap3);Sfur014763(lap3);MSTRG.13171(GGCT);MSTRG.27383(se);MSTRG.35605(ANPEP)	K11140+K10808+K18592+K04097+K10807+K00432+K11142+K11142+K00799+K11142+K11142+K11140+K00681+K11142+K00031+K00799+K11142+K11142+K00682+K00310+K11140
Metabolism	Carbohydrate metabolism	Glycolysis / Gluconeogenesis	25	72	0.006936519	8.61E-02	ko00010	Sfur000483(PKLR);Sfur000490(--);Sfur000898(T05H10.6);Sfur001986(AKR1B8);Sfur002041(Pgi);Sfur002233(HK1);Sfur002309(AKR1B8);Sfur005279(YMR099C);Sfur005488(PGK1);Sfur006735(pgk-1);Sfur007076(pdhb-1);Sfur008187(GAPDH);Sfur008511(PyK);Sfur008676(Mipp1);Sfur013135(Aldh2);Sfur013438(Pfk);Sfur013548(PDHB);Sfur014064(PGM2);Sfur015029(Ald1);Sfur015261(aldo-2);MSTRG.12820(ALDOB);MSTRG.13192(mro);MSTRG.2561…	K00873+K03103+K00161+K00002+K01810+K00844+K00002+K01792+K00927+K00927+K00162+K00134+K00873+K03103+K00128+K00850+K00162+K15779+K01623+K01623+K01623+K01785+K00844+K00844+K00128
Organismal Systems	Digestive system	Cholesterol metabolism	25	72	0.006936519	8.61E-02	ko04979	Sfur000033(FAM43A);Sfur000881(Lip1);Sfur001001(SCARB1);Sfur001590(Lip1);Sfur002002(--);Sfur002482(--);Sfur002672(Lrp2);Sfur003100(pes);Sfur003517(--);Sfur003906(Lip1);Sfur003909(--);Sfur004150(Ptchd3);Sfur005842(pes);Sfur006300(Lip1);Sfur006408(NT1);Sfur007288(LRP1);Sfur007895(SCARB2);Sfur010095(apolpp);Sfur010427(Lip3);Sfur010830(Lip3);Sfur012938(Ldlrap1);Sfur013509(Tspo);Sfur013903(--);MSTRG.35…	K12474+K01052+K13885+K01052+K06233+K00637+K06233+K13885+K13885+K01052+K01052+K12385+K13885+K01052+K01052+K04550+K13885+K14462+K01052+K01052+K12474+K05770+K22290+K01052+K13885
Organismal Systems	Digestive system	Protein digestion and absorption	38	121	0.007275355	8.70E-02	ko04974	Sfur000630(--);Sfur001806(Slc16a10);Sfur002888(Slc8a1);Sfur003547(nas-13);Sfur003704(--);Sfur003875(--);Sfur005392(--);Sfur005554(Cpb2);Sfur006111(--);Sfur006971(Agrn);Sfur008572(path);Sfur008762(--);Sfur008892(--);Sfur009405(DPP4);Sfur009434(DERP3);Sfur009910(PRSS1);Sfur010066(path);Sfur010342(path);Sfur010661(Mdga2);Sfur010786(CG1139);Sfur011699(CTRB1);Sfur011902(Slc8a1);Sfur012186(thetaTry);Sf…	K06237+K08187+K05849+K08606+K19721+K19720+K19720+K01298+K06237+K06238+K14209+K19720+K19720+K01278+K01312+K01312+K14209+K14209+K08606+K14209+K01310+K05849+K01312+K01298+K13781+K01298+K19720+K13781+K08187+K08187+K19720+K06237+K19720+K14209+K05849+K14209+K14209+K06237
Metabolism	Carbohydrate metabolism	Pentose phosphate pathway	15	38	0.009371665	1.05E-01	ko00030	Sfur002041(Pgi);Sfur006611(rgn);Sfur006937(LMJF_27_0420);Sfur007062(Gld);Sfur007447(Gld);Sfur012802(rgn);Sfur013192(yvrE);Sfur013438(Pfk);Sfur014064(PGM2);Sfur015029(Ald1);Sfur015203(rgn);Sfur015261(aldo-2);MSTRG.12820(ALDOB);MSTRG.38392(Gld);MSTRG.38393(Gld)	K01810+K01053+K00852+K00115+K00115+K01053+K01053+K00850+K15779+K01623+K01053+K01623+K01623+K00115+K00115
Cellular Processes	Transport and catabolism	Lysosome	53	182	0.009601163	1.05E-01	ko04142	Sfur000028(GD10667);Sfur000110(Ppt2);Sfur000111(Arsb);Sfur000424(CG17119);Sfur000881(Lip1);Sfur001004(atp6v0a1);Sfur001487(NAGA);Sfur001590(Lip1);Sfur001643(NAGA);Sfur001670(fdl);Sfur002072(Ppt1);Sfur002836(Sumf1);Sfur003756(slc17a8);Sfur003819(Cd63);Sfur003906(Lip1);Sfur003909(--);Sfur004150(Ptchd3);Sfur004459(SGSH);Sfur005197(Hgsnat);Sfur005885(cfaD);Sfur006300(Lip1);Sfur006408(NT1);Sfur006887(…	K01444+K01074+K01135+K12386+K01052+K02154+K01204+K01052+K01189+K12373+K01074+K13444+K12301+K06497+K01052+K01052+K12385+K01565+K10532+K01365+K01052+K01052+K12309+K01363+K01135+K01135+K12389+K01135+K01135+K01135+K03661+K19363+K01206+K01205+K01052+K01052+K02146+K12311+K12350+K02146+K21398+K12309+K01365+K01365+K01365+K12309+K06497+K12316+K12316+K12316+K12316+K12398+K01052
