# Supplementary material for: Interaction Analysis of lncRNA and mRNA Based on the Full-Length Transcriptome of the Nymph-to-Adult Developmental Transition of Sogatella furcifera
Source: Insects. 2023 Mar 23;14(4):308. doi: 10.3390/insects14040308 (PMC10141146; doi:10.3390/insects14040308)
Supplement: Supplementary file 1 [file insects-14-00308-s001.zip › Table S5. STEM software cluster analysis of mRNA and lncRNA expression trend results.xlsx]

## Sheet: mRNA 
profile 0
id	PE	DE	AE	Symbol	Description	KEGG_A_class	KEGG_B_class	Pathway	K_ID	GO Component	GO Function	GO Process
MSTRG.10771	5.543	0.527	0.217	Edg84A	cuticle protein 19-like, partial [Nilaparvata lugens]	-	-	-	-	-	GO:0005214//structural constituent of chitin-based cuticle	GO:0042335//cuticle development
MSTRG.12125	192.307	107.69	69.617	PSMB5	proteasome subunit beta type-5 [Nilaparvata lugens]	Genetic Information Processing	Folding, sorting and degradation	ko03050//Proteasome	K02737	-	-	-
MSTRG.13270	3.38	2.583	1.26	--	-	-	-	-	-	-	-	-
MSTRG.14199	23.81	9.597	6.617	AAEL008004	fatty acid elongase [Nilaparvata lugens]	Metabolism;Metabolism;Metabolism;Metabolism	Global and overview maps;Global and overview maps;Lipid metabolism;Lipid metabolism	ko01100//Metabolic pathways;ko01212//Fatty acid metabolism;ko01040//Biosynthesis of unsaturated fatty acids;ko00062//Fatty acid elongation	K10250;K10250;K10250;K10250	-	-	-
MSTRG.14238	3.413	1.267	0.37	--	uncharacterized protein LOC111044506 [Nilaparvata lugens]	-	-	-	-	-	-	-
MSTRG.14567	12.127	1.953	0.963	--	hypothetical protein LSTR_LSTR005957 [Laodelphax striatellus]	-	-	-	-	-	-	-
MSTRG.14636	3.42	2.21	1.69	rnaseh2b	ribonuclease H2 subunit B [Nilaparvata lugens]	Genetic Information Processing	Replication and repair	ko03030//DNA replication	K10744	-	-	GO:0009987//cellular process;GO:0071704//organic substance metabolic process
MSTRG.14696	6.9	3.153	2.097	--	targeting protein for Xklp2 homolog [Nilaparvata lugens]	-	-	-	-	-	-	-
MSTRG.15848	0.973	0.267	0.1	--	-	-	-	-	-	-	-	-
MSTRG.18721	25.097	15.423	12.113	BOL3	bolA-like protein 3 [Nilaparvata lugens]	-	-	-	-	-	-	-
MSTRG.19251	2.753	1.603	1.303	--	ORF 7 [Spodoptera frugiperda]	-	-	-	-	-	-	-
MSTRG.20431	1.177	0.69	0.223	METTL18	ubiquitin-like-conjugating enzyme ATG10 [Nilaparvata lugens]	Cellular Processes;Cellular Processes	Transport and catabolism;Transport and catabolism	ko04140//Autophagy - animal;ko04136//Autophagy - other eukaryotes	K17888;K17888	-	-	-
MSTRG.21946	3.62	1.59	1.117	--	NAD-dependent protein deacetylase Sir2B-like [Myzus persicae]	-	-	-	-	-	-	-
MSTRG.22523	40.363	26.15	18.577	--	hypothetical protein LSTR_LSTR004018 [Laodelphax striatellus]	-	-	-	-	-	-	-
MSTRG.2311	2.633	1.423	1.013	intu	protein inturned isoform X1 [Cryptotermes secundus]	-	-	-	-	GO:0044464//cell part	-	GO:0008544//epidermis development;GO:0008589//regulation of smoothened signaling pathway;GO:0048523//negative regulation of cellular process;GO:0048731//system development;GO:0048858//cell projection morphogenesis
MSTRG.23598	5.447	2.457	1.41	VARS1	valine--tRNA ligase-like [Nilaparvata lugens]	Genetic Information Processing	Translation	ko00970//Aminoacyl-tRNA biosynthesis	K01873	-	-	-
MSTRG.23852	1.93	0.953	0.68	Dock9	dedicator of cytokinesis protein 9-like, partial [Nilaparvata lugens]	-	-	-	-	-	-	-
MSTRG.24079	152.453	71.36	53.5	Prosalpha2	proteasome subunit alpha type-2 [Nilaparvata lugens]	Genetic Information Processing	Folding, sorting and degradation	ko03050//Proteasome	K02726	-	-	-
MSTRG.24161	9.76	4.12	2.847	--	suppressor protein SRP40-like [Nilaparvata lugens]	-	-	-	-	-	-	-
MSTRG.25232	6.823	1.497	0.59	--	hypothetical protein LSTR_LSTR003003 [Laodelphax striatellus]	-	-	-	-	-	-	-
MSTRG.2663	7.76	4.11	3.08	NUP43	nucleoporin Nup43-like [Nilaparvata lugens]	Genetic Information Processing	Translation	ko03013//RNA transport	K14305	-	-	-
MSTRG.29743	6.317	0.173	0.04	nas-13	low choriolytic enzyme [Nilaparvata lugens]	-	-	-	-	GO:0031410//cytoplasmic vesicle	GO:0046914//transition metal ion binding;GO:0070011//peptidase activity, acting on L-amino acid peptides	GO:0007338//single fertilization;GO:0009987//cellular process;GO:0019538//protein metabolic process;GO:0050789//regulation of biological process
MSTRG.30154	167.31	69.52	44.447	--	-	-	-	-	-	-	-	-
MSTRG.30918	12.057	6.757	5.367	ddr-2	discoidin domain-containing receptor 2-like [Nilaparvata lugens]	-	-	-	-	-	-	-
MSTRG.32695	7.283	3.73	2.617	TY3B-G	polyprotein [Mizuhopecten yessoensis]	-	-	-	-	-	-	-
MSTRG.3270	3.6	2.24	1.417	l(3)72Ab	U5 small nuclear ribonucleoprotein 200 kDa helicase [Asbolus verrucosus]	Genetic Information Processing	Transcription	ko03040//Spliceosome	K12854	GO:0005681//spliceosomal complex;GO:0031981//nuclear lumen;GO:0097525//spliceosomal snRNP complex	GO:0003723//RNA binding;GO:0003724//RNA helicase activity;GO:0005515//protein binding;GO:0032550//purine ribonucleoside binding;GO:0042623//ATPase activity, coupled	GO:0000245//spliceosomal complex assembly;GO:0001503//ossification
MSTRG.33872	19.803	11.98	8.307	Ap3m1	AP-3 complex subunit mu-1 isoform X1 [Nilaparvata lugens]	Cellular Processes	Transport and catabolism	ko04142//Lysosome	K12398	GO:0000323//lytic vacuole;GO:0005774//vacuolar membrane;GO:0012506//vesicle membrane;GO:0016023//cytoplasmic, membrane-bounded vesicle;GO:0030119//AP-type membrane coat adaptor complex	GO:0017016//Ras GTPase binding;GO:0022892//substrate-specific transporter activity	GO:0001505//regulation of neurotransmitter levels;GO:0006623//protein targeting to vacuole;GO:0006901//vesicle coating;GO:0007033//vacuole organization;GO:0008088//axo-dendritic transport;GO:0010259//multicellular organism aging;GO:0030154//cell differentiation;GO:0044267//cellular protein metabolic process;GO:0048489//synaptic vesicle transport
MSTRG.35242	7.23	4.07	2.53	--	-	-	-	-	-	-	-	-
MSTRG.36570	1.34	0.537	0.277	Smc1b	structural maintenance of chromosomes protein 1A [Nilaparvata lugens]	Cellular Processes;Cellular Processes	Cell growth and death;Cell growth and death	ko04110//Cell cycle;ko04114//Oocyte meiosis	K06636;K06636	GO:0000228//nuclear chromosome;GO:0000775//chromosome, centromeric region;GO:0008278//cohesin complex;GO:0044444//cytoplasmic part	GO:0003723//RNA binding;GO:0003774//motor activity;GO:0032403//protein complex binding;GO:0032550//purine ribonucleoside binding;GO:0046983//protein dimerization activity	GO:0000075//cell cycle checkpoint;GO:0000087//mitotic M phase;GO:0000278//mitotic cell cycle;GO:0000280//nuclear division;GO:0000377//RNA splicing, via transesterification reactions with bulged adenosine as nucleophile;GO:0000819//sister chromatid segregation;GO:0006259//DNA metabolic process;GO:0007051//spindle organization;GO:0007062//sister chromatid cohesion;GO:0009628//response to abiotic st…
MSTRG.38205	9.987	5.29	4.033	--	AGAP004293-PA [Anopheles gambiae str. PEST] [Anopheles gambiae]	-	-	-	-	-	-	-
MSTRG.4355	27.89	15.843	12.013	HSP70B2	heat shock protein 70-1 [Laodelphax striatellus]	Cellular Processes;Genetic Information Processing;Genetic Information Processing;Environmental Information Processing;Organismal Systems;Organismal Systems;Human Diseases;Human Diseases;Organismal Systems;Human Diseases	Transport and catabolism;Folding, sorting and degradation;Transcription;Signal transduction;Endocrine system;Aging;Infectious diseases;Infectious diseases;Immune system;Infectious diseases	ko04144//Endocytosis;ko04141//Protein processing in endoplasmic reticulum;ko03040//Spliceosome;ko04010//MAPK signaling pathway;ko04915//Estrogen signaling pathway;ko04213//Longevity regulating pathway - multiple species;ko05162//Measles;ko05145//Toxoplasmosis;ko04612//Antigen processing and presentation;ko05134//Legionellosis	K03283;K03283;K03283;K03283;K03283;K03283;K03283;K03283;K03283;K03283	-	-	-
MSTRG.4449	3.42	0.877	0.463	--	osiris 24-like protein [Lasius niger]	-	-	-	-	-	-	-
MSTRG.4834	1.233	0.6	0.387	--	-	-	-	-	-	-	-	-
MSTRG.5282	18.08	7.253	5.033	--	high mobility group protein I [Sipha flava]	-	-	-	-	-	-	-
MSTRG.7902	23.887	13.353	6.247	--	Integrase catalytic domain-containing protein [Aphis craccivora]	-	-	-	-	-	-	-
MSTRG.850	32.21	10.427	5.857	--	alpha-tocopherol transfer protein-like [Nilaparvata lugens]	-	-	-	-	-	-	-
MSTRG.9036	3.72	1.497	1.057	Mcm6	LOW QUALITY PROTEIN: DNA replication licensing factor Mcm6-like [Nilaparvata lugens]	Cellular Processes;Genetic Information Processing	Cell growth and death;Replication and repair	ko04110//Cell cycle;ko03030//DNA replication	K02542;K02542	GO:0031981//nuclear lumen;GO:0036387//pre-replicative complex;GO:0043234//protein complex	GO:0003677//DNA binding;GO:0003678//DNA helicase activity;GO:0005515//protein binding;GO:0032550//purine ribonucleoside binding	GO:0006277//DNA amplification;GO:0022616//DNA strand elongation;GO:0032508//DNA duplex unwinding;GO:0045168//cell-cell signaling involved in cell fate commitment;GO:0051320//S phase;GO:1902299//pre-replicative complex assembly involved in cell cycle DNA replication
Sfur000032	1.667	0.96	0.68	kto	Mediator of RNA polymerase II transcription subunit 12	Organismal Systems	Endocrine system	ko04919//Thyroid hormone signaling pathway	K15162	GO:0005634//nucleus;GO:0005700//polytene chromosome;GO:0016592//mediator complex;GO:0070847//core mediator complex	GO:0003712//transcription cofactor activity;GO:0003713//transcription coactivator activity	GO:0006357//regulation of transcription from RNA polymerase II promoter;GO:0022416//chaeta development;GO:0035072//ecdysone-mediated induction of salivary gland cell autophagic cell death;GO:0036011//imaginal disc-derived leg segmentation;GO:0045498//sex comb development;GO:0048749//compound eye development;GO:0090263//positive regulation of canonical Wnt signaling pathway
Sfur000088	1.343	0.447	0.257	--	Putative uncharacterized protein	-	-	-	-	-	-	-
Sfur000123	15.607	8.157	5.287	--	Putative uncharacterized protein	-	-	-	-	-	-	-
Sfur000382	30.677	18.92	15.327	INTS4	Integrator complex subunit 4	-	-	-	-	GO:0005634//nucleus;GO:0005654//nucleoplasm;GO:0005730//nucleolus;GO:0032039//integrator complex	-	GO:0016180//snRNA processing;GO:0042795//snRNA transcription from RNA polymerase II promoter
Sfur000497	29.957	17.047	13.86	--	Transmembrane protein 186	-	-	-	-	GO:0005739//mitochondrion;GO:0016021//integral component of membrane	-	-
Sfur000526	2.767	1.127	0.357	--	Phospholipase A2 OS2	Metabolism;Environmental Information Processing;Organismal Systems;Organismal Systems;Metabolism;Organismal Systems;Metabolism;Metabolism;Metabolism;Metabolism	Global and overview maps;Signal transduction;Digestive system;Circulatory system;Lipid metabolism;Digestive system;Lipid metabolism;Lipid metabolism;Lipid metabolism;Lipid metabolism	ko01100//Metabolic pathways;ko04014//Ras signaling pathway;ko04972//Pancreatic secretion;ko04270//Vascular smooth muscle contraction;ko00564//Glycerophospholipid metabolism;ko04975//Fat digestion and absorption;ko00590//Arachidonic acid metabolism;ko00565//Ether lipid metabolism;ko00592//alpha-Linolenic acid metabolism;ko00591//Linoleic acid metabolism	K01047;K01047;K01047;K01047;K01047;K01047;K01047;K01047;K01047;K01047	GO:0005576//extracellular region	GO:0004623//phospholipase A2 activity;GO:0005509//calcium ion binding	GO:0006644//phospholipid metabolic process;GO:0016042//lipid catabolic process;GO:0050482//arachidonic acid secretion
Sfur000539	4.897	0.63	0.103	--	Putative uncharacterized protein	-	-	-	-	-	-	-
Sfur000601	4.33	1.63	1.087	KCNJ2	ATP-sensitive inward rectifier potassium channel 12	-	-	-	-	GO:0005886//plasma membrane;GO:0016021//integral component of membrane;GO:0031224//intrinsic component of membrane	GO:0005242//inward rectifier potassium channel activity	GO:0006813//potassium ion transport;GO:0034765//regulation of ion transmembrane transport;GO:0051289//protein homotetramerization;GO:1990573//potassium ion import across plasma membrane
Sfur000638	12.883	8.483	5.933	SLC26A11	Sodium-independent sulfate anion transporter	-	-	-	-	GO:0005654//nucleoplasm;GO:0005765//lysosomal membrane;GO:0005783//endoplasmic reticulum;GO:0005794//Golgi apparatus;GO:0005886//plasma membrane;GO:0005887//integral component of plasma membrane;GO:0016021//integral component of membrane	GO:0008271//secondary active sulfate transmembrane transporter activity;GO:0008509//anion transmembrane transporter activity;GO:0015116//sulfate transmembrane transporter activity;GO:0015301//anion:anion antiporter activity	GO:0008272//sulfate transport
Sfur000677	723.533	421.477	342.083	--	Putative uncharacterized protein	-	-	-	-	-	-	-
Sfur000698	3.47	1.707	1.177	PGBD2	Chimeric ERCC6-PGBD3 protein	-	-	-	-	GO:0005654//nucleoplasm;GO:0016604//nuclear body	GO:0043565//sequence-specific DNA binding	GO:0002230//positive regulation of defense response to virus by host;GO:0010628//positive regulation of gene expression;GO:0033141//positive regulation of peptidyl-serine phosphorylation of STAT protein;GO:0045739//positive regulation of DNA repair
Sfur000741	4.7	2.103	1.447	Mes4	DNA polymerase epsilon subunit 4	Genetic Information Processing;Genetic Information Processing;Genetic Information Processing	Replication and repair;Replication and repair;Replication and repair	ko03420//Nucleotide excision repair;ko03030//DNA replication;ko03410//Base excision repair	K03506;K03506;K03506	GO:0005634//nucleus;GO:0008622//epsilon DNA polymerase complex	GO:0046982//protein heterodimerization activity	GO:0006261//DNA-dependent DNA replication
Sfur000759	13.647	7.57	5.733	--	Putative uncharacterized protein	-	-	-	-	-	-	-
Sfur000862	2176.62	1526.29	1058.45	RpL38	60S ribosomal protein L38	Genetic Information Processing	Translation	ko03010//Ribosome	K02923	GO:0005840//ribosome	GO:0003735//structural constituent of ribosome	GO:0006412//translation
Sfur000871	2.35	1.18	0.85	Top3a	DNA topoisomerase 3-alpha	Genetic Information Processing;Genetic Information Processing	Replication and repair;Replication and repair	ko03460//Fanconi anemia pathway;ko03440//Homologous recombination	K03165;K03165	GO:0005634//nucleus;GO:0005654//nucleoplasm;GO:0005694//chromosome;GO:0005759//mitochondrial matrix;GO:0016605//PML body	GO:0003697//single-stranded DNA binding;GO:0003916//DNA topoisomerase activity;GO:0003917//DNA topoisomerase type I activity;GO:0008270//zinc ion binding	GO:0006265//DNA topological change;GO:0032042//mitochondrial DNA metabolic process;GO:0051304//chromosome separation
Sfur000894	0.773	0.083	0.027	--	Putative uncharacterized protein	-	-	-	-	-	-	-
Sfur000897	78.9	31.08	20.38	Srp19	Signal recognition particle 19 kDa protein	Genetic Information Processing	Folding, sorting and degradation	ko03060//Protein export	K03105	GO:0005786//signal recognition particle, endoplasmic reticulum targeting	GO:0008312//7S RNA binding	GO:0006617//SRP-dependent cotranslational protein targeting to membrane, signal sequence recognition
Sfur000951	6.673	3.993	3.003	CG6388	Probable tRNA (guanine(26)-N(2))-dimethyltransferase	-	-	-	-	GO:0005634//nucleus	GO:0000049//tRNA binding;GO:0004809//tRNA (guanine-N2-)-methyltransferase activity	GO:0002940//tRNA N2-guanine methylation
Sfur001030	4.083	2.263	1.817	Pdxdc1	Pyridoxal-dependent decarboxylase domain-containing protein 1	Metabolism;Metabolism;Metabolism	Global and overview maps;Glycan biosynthesis and metabolism;Glycan biosynthesis and metabolism	ko01100//Metabolic pathways;ko00601//Glycosphingolipid biosynthesis - lacto and neolacto series;ko00603//Glycosphingolipid biosynthesis - globo and isoglobo series	K01988;K01988;K01988	GO:0005783//endoplasmic reticulum;GO:0005794//Golgi apparatus;GO:0043231//intracellular membrane-bounded organelle	GO:0008117//sphinganine-1-phosphate aldolase activity;GO:0016831//carboxy-lyase activity;GO:0030170//pyridoxal phosphate binding	GO:0001667//ameboidal-type cell migration;GO:0006665//sphingolipid metabolic process;GO:0019752//carboxylic acid metabolic process;GO:0030149//sphingolipid catabolic process
Sfur001087	9.63	5.697	4.283	--	Protein ELYS	-	-	-	-	GO:0005643//nuclear pore;GO:0005654//nucleoplasm;GO:0005737//cytoplasm	GO:0003677//DNA binding	GO:0015031//protein transport;GO:0051028//mRNA transport
Sfur001115	64.637	37.873	30.37	Psmd12	26S proteasome non-ATPase regulatory subunit 12	Human Diseases;Genetic Information Processing	Infectious diseases;Folding, sorting and degradation	ko05169//Epstein-Barr virus infection;ko03050//Proteasome	K03035;K03035	GO:0000502//proteasome complex;GO:0005737//cytoplasm;GO:0005838//proteasome regulatory particle;GO:0008541//proteasome regulatory particle, lid subcomplex;GO:0022624//proteasome accessory complex;GO:0031595//nuclear proteasome complex	-	GO:0043161//proteasome-mediated ubiquitin-dependent protein catabolic process
Sfur001192	148.727	84.99	67.313	Dox-A2	Probable 26S proteasome non-ATPase regulatory subunit 3	Human Diseases;Genetic Information Processing	Infectious diseases;Folding, sorting and degradation	ko05169//Epstein-Barr virus infection;ko03050//Proteasome	K03033;K03033	GO:0008541//proteasome regulatory particle, lid subcomplex	GO:0030234//enzyme regulator activity	GO:0006511//ubiquitin-dependent protein catabolic process;GO:0042176//regulation of protein catabolic process
Sfur001206	2.787	1.293	0.953	Timeless	Protein timeless homolog	-	-	-	-	GO:0000228//nuclear chromosome;GO:0000790//nuclear chromatin;GO:0005634//nucleus;GO:0005654//nucleoplasm;GO:0031298//replication fork protection complex;GO:0035861//site of double-strand break	GO:0003677//DNA binding	GO:0000076//DNA replication checkpoint;GO:0000122//negative regulation of transcription from RNA polymerase II promoter;GO:0001658//branching involved in ureteric bud morphogenesis;GO:0001822//kidney development;GO:0002009//morphogenesis of an epithelium;GO:0006281//DNA repair;GO:0006974//cellular response to DNA damage stimulus;GO:0007623//circadian rhythm;GO:0030324//lung development;GO:0042752…
Sfur001288	16.727	10.43	7.957	Rpb4	DNA-directed RNA polymerase II subunit Rpb4	Human Diseases;Genetic Information Processing	Neurodegenerative diseases;Transcription	ko05016//Huntington disease;ko03020//RNA polymerase	K03012;K03012	GO:0000932//cytoplasmic mRNA processing body;GO:0005665//DNA-directed RNA polymerase II, core complex;GO:0005700//polytene chromosome;GO:0005703//polytene chromosome puff;GO:0005705//polytene chromosome interband	GO:0000166//nucleotide binding;GO:0003899//DNA-directed RNA polymerase activity;GO:0031369//translation initiation factor binding	GO:0000288//nuclear-transcribed mRNA catabolic process, deadenylation-dependent decay;GO:0006366//transcription from RNA polymerase II promoter;GO:0006367//transcription initiation from RNA polymerase II promoter;GO:0031990//mRNA export from nucleus in response to heat stress;GO:0034402//recruitment of 3'-end processing factors to RNA polymerase II holoenzyme complex;GO:0045948//positive regulati…
Sfur001296	6.987	4.177	3.143	--	NudC domain-containing protein 2	-	-	-	-	GO:0000777//condensed chromosome kinetochore;GO:0000922//spindle pole;GO:0005737//cytoplasm;GO:0005815//microtubule organizing center;GO:0005829//cytosol;GO:0015630//microtubule cytoskeleton;GO:0045171//intercellular bridge;GO:0072686//mitotic spindle	GO:0051082//unfolded protein binding	GO:0006457//protein folding;GO:0032502//developmental process
Sfur001320	6.26	2.5	1.683	cep135	Centrosomal protein of 135 kDa	-	-	-	-	GO:0005737//cytoplasm;GO:0005814//centriole	-	GO:0007099//centriole replication;GO:0010457//centriole-centriole cohesion
Sfur001473	147.337	90.483	71.347	--	Proteasome maturation protein	Genetic Information Processing	Folding, sorting and degradation	ko03050//Proteasome	K11599	GO:0005634//nucleus;GO:0005737//cytoplasm;GO:0005783//endoplasmic reticulum;GO:0005829//cytosol;GO:0016607//nuclear speck;GO:0031090//organelle membrane	-	GO:0043248//proteasome assembly
Sfur001474	1.867	0.843	0.61	Anapc4	Anaphase-promoting complex subunit 4	Human Diseases;Genetic Information Processing;Cellular Processes;Cellular Processes;Organismal Systems	Infectious diseases;Folding, sorting and degradation;Cell growth and death;Cell growth and death;Endocrine system	ko05166//HTLV-I infection;ko04120//Ubiquitin mediated proteolysis;ko04110//Cell cycle;ko04114//Oocyte meiosis;ko04914//Progesterone-mediated oocyte maturation	K03351;K03351;K03351;K03351;K03351	GO:0005634//nucleus;GO:0005680//anaphase-promoting complex;GO:0034399//nuclear periphery	GO:0019903//protein phosphatase binding	GO:0007049//cell cycle;GO:0031145//anaphase-promoting complex-dependent proteasomal ubiquitin-dependent protein catabolic process;GO:0045842//positive regulation of mitotic metaphase/anaphase transition;GO:0051301//cell division;GO:0070979//protein K11-linked ubiquitination
Sfur001497	9.85	7.8	4.21	Dtd	D-aminoacyl-tRNA deacylase	-	-	-	-	GO:0005737//cytoplasm	GO:0000049//tRNA binding;GO:0002161//aminoacyl-tRNA editing activity;GO:0051500//D-tyrosyl-tRNA(Tyr) deacylase activity	GO:0006399//tRNA metabolic process
Sfur001513	11.643	6.007	4.673	NARS2	Probable asparagine--tRNA ligase, mitochondrial	Genetic Information Processing	Translation	ko00970//Aminoacyl-tRNA biosynthesis	K01893	GO:0005654//nucleoplasm;GO:0005739//mitochondrion;GO:0005759//mitochondrial matrix;GO:0005829//cytosol	GO:0003676//nucleic acid binding;GO:0004816//asparagine-tRNA ligase activity;GO:0005524//ATP binding	GO:0006421//asparaginyl-tRNA aminoacylation
Sfur001617	10.37	4.037	2.633	Est-6	Venom carboxylesterase-6	Metabolism	Metabolism of terpenoids and polyketides	ko00981//Insect hormone biosynthesis	K01063	GO:0005576//extracellular region	GO:0080030//methyl indole-3-acetate esterase activity	-
Sfur001774	3.227	1.337	0.953	--	Putative uncharacterized protein	Genetic Information Processing;Genetic Information Processing	Replication and repair;Replication and repair	ko03420//Nucleotide excision repair;ko03460//Fanconi anemia pathway	K10848;K10848	-	-	-
Sfur001933	1.407	0.943	0.657	VIRMA	Protein virilizer	-	-	-	-	GO:0005634//nucleus;GO:0036396//MIS complex	-	GO:0000375//RNA splicing, via transesterification reactions;GO:0000381//regulation of alternative mRNA splicing, via spliceosome;GO:0006397//mRNA processing;GO:0007539//primary sex determination, soma;GO:0007548//sex differentiation;GO:0030154//cell differentiation;GO:0080009//mRNA methylation;GO:1903688//positive regulation of border follicle cell migration
Sfur001986	21.467	11.663	9.15	AKR1B8	Aldose reductase-related protein 2	Metabolism;Metabolism;Metabolism;Metabolism	Global and overview maps;Lipid metabolism;Carbohydrate metabolism;Carbohydrate metabolism	ko01100//Metabolic pathways;ko00561//Glycerolipid metabolism;ko00010//Glycolysis / Gluconeogenesis;ko00040//Pentose and glucuronate interconversions	K00002;K00002;K00002;K00002	GO:0005737//cytoplasm	GO:0004032//alditol:NADP+ 1-oxidoreductase activity	-
Sfur001987	1.243	0.63	0.383	AtMg00820	Retrovirus-related Pol polyprotein from transposon TNT 1-94	Human Diseases	Neurodegenerative diseases	ko05016//Huntington disease	K10408	-	GO:0003676//nucleic acid binding;GO:0003964//RNA-directed DNA polymerase activity;GO:0004190//aspartic-type endopeptidase activity;GO:0004519//endonuclease activity;GO:0008270//zinc ion binding	GO:0015074//DNA integration
Sfur002073	1.65	0.55	0.31	NUDT3	Diphosphoinositol polyphosphate phosphohydrolase 1	-	-	-	-	GO:0005634//nucleus;GO:0005737//cytoplasm;GO:0005829//cytosol	GO:0000287//magnesium ion binding;GO:0000298//endopolyphosphatase activity;GO:0008486//diphosphoinositol-polyphosphate diphosphatase activity;GO:0034431//bis(5'-adenosyl)-hexaphosphatase activity;GO:0034432//bis(5'-adenosyl)-pentaphosphatase activity;GO:0050072//m7G(5')pppN diphosphatase activity;GO:0052840//inositol diphosphate tetrakisphosphate diphosphatase activity;GO:0052842//inositol diphos…	GO:0007267//cell-cell signaling;GO:0015961//diadenosine polyphosphate catabolic process;GO:0043647//inositol phosphate metabolic process;GO:0071543//diphosphoinositol polyphosphate metabolic process;GO:0071544//diphosphoinositol polyphosphate catabolic process;GO:1901907//diadenosine pentaphosphate catabolic process;GO:1901909//diadenosine hexaphosphate catabolic process;GO:1901911//adenosine 5'-…
Sfur002136	0.847	0.183	0.077	--	PiggyBac transposable element-derived protein 4	-	-	-	-	-	-	-
Sfur002163	145.997	24.113	11.287	bdl	Protein borderless	-	-	-	-	GO:0005886//plasma membrane;GO:0005887//integral component of plasma membrane;GO:0030424//axon	GO:0098632//protein binding involved in cell-cell adhesion	GO:0007156//homophilic cell adhesion via plasma membrane adhesion molecules;GO:0007158//neuron cell-cell adhesion;GO:0007411//axon guidance;GO:0008366//axon ensheathment;GO:0042065//glial cell growth;GO:0045467//R7 cell development;GO:0070593//dendrite self-avoidance
Sfur002201	2.437	1.197	0.71	--	Putative uncharacterized protein	-	-	-	-	-	-	-
Sfur002203	13.833	9.923	5.753	ubxn1-b	UBX domain-containing protein 1-B	-	-	-	-	GO:0005737//cytoplasm	-	-
Sfur002353	6.16	3.237	2.477	FCF1	rRNA-processing protein FCF1 homolog	Genetic Information Processing	Translation	ko03008//Ribosome biogenesis in eukaryotes	K14566	GO:0005730//nucleolus;GO:0032040//small-subunit processome	-	GO:0006364//rRNA processing
Sfur002373	3.25	0.267	0	--	Putative uncharacterized protein	-	-	-	-	-	-	-
Sfur002407	5.5	3.25	2.597	Tmem87b	Transmembrane protein 87B	-	-	-	-	GO:0000139//Golgi membrane;GO:0005794//Golgi apparatus;GO:0005829//cytosol;GO:0016020//membrane;GO:0016021//integral component of membrane	-	GO:0042147//retrograde transport, endosome to Golgi
Sfur002793	7.683	4.927	3.823	ROBO2	Roundabout homolog 2	Organismal Systems;Organismal Systems	Development;Development and regeneration	ko04360//Axon guidance;ko04361//Axon regeneration	K06754;K06754	GO:0005886//plasma membrane;GO:0009986//cell surface;GO:0016021//integral component of membrane;GO:0030673//axolemma;GO:0070062//extracellular exosome	GO:0008046//axon guidance receptor activity;GO:0042802//identical protein binding	GO:0001656//metanephros development;GO:0001657//ureteric bud development;GO:0003148//outflow tract septum morphogenesis;GO:0003180//aortic valve morphogenesis;GO:0003184//pulmonary valve morphogenesis;GO:0003272//endocardial cushion formation;GO:0007156//homophilic cell adhesion via plasma membrane adhesion molecules;GO:0007411//axon guidance;GO:0007417//central nervous system development;GO:0007…
Sfur002828	1.413	0.593	0.35	HPGD	15-hydroxyprostaglandin dehydrogenase [NAD(+)]	Human Diseases	Cancers	ko05202//Transcriptional misregulation in cancers	K00069	GO:0005737//cytoplasm	GO:0004957//prostaglandin E receptor activity;GO:0016404//15-hydroxyprostaglandin dehydrogenase (NAD+) activity;GO:0016616//oxidoreductase activity, acting on the CH-OH group of donors, NAD or NADP as acceptor;GO:0051287//NAD binding;GO:0070403//NAD+ binding	GO:0006693//prostaglandin metabolic process;GO:0007179//transforming growth factor beta receptor signaling pathway;GO:0007565//female pregnancy;GO:0007567//parturition;GO:0030728//ovulation;GO:0045786//negative regulation of cell cycle;GO:0070493//thrombin receptor signaling pathway;GO:0097070//ductus arteriosus closure
Sfur002845	1.913	0.987	0.75	Xrcc1	DNA repair protein XRCC1	Genetic Information Processing	Replication and repair	ko03410//Base excision repair	K10803	GO:0000784//nuclear chromosome, telomeric region;GO:0000790//nuclear chromatin;GO:0005634//nucleus;GO:0005654//nucleoplasm;GO:0005730//nucleolus;GO:0070522//ERCC4-ERCC1 complex	GO:0019899//enzyme binding;GO:0032356//oxidized DNA binding;GO:1990599//3' overhang single-stranded DNA endodeoxyribonuclease activity	GO:0000012//single strand break repair;GO:0001666//response to hypoxia;GO:0006281//DNA repair;GO:0006284//base-excision repair;GO:0006303//double-strand break repair via nonhomologous end joining;GO:0006974//cellular response to DNA damage stimulus;GO:0010033//response to organic substance;GO:0010836//negative regulation of protein ADP-ribosylation;GO:0021587//cerebellum morphogenesis;GO:0021766/…
Sfur002851	7.3	4.353	3.243	--	Putative uncharacterized protein	-	-	-	-	-	-	-
Sfur002875	9.733	5.84	4.753	Racgap1	Rac GTPase-activating protein 1	-	-	-	-	GO:0001669//acrosomal vesicle;GO:0005634//nucleus;GO:0005654//nucleoplasm;GO:0030496//midbody;GO:0031234//extrinsic component of cytoplasmic side of plasma membrane;GO:0032154//cleavage furrow;GO:0051233//spindle midzone;GO:0072686//mitotic spindle;GO:0090543//Flemming body;GO:0097149//centralspindlin complex	GO:0005096//GTPase activator activity;GO:0005547//phosphatidylinositol-3,4,5-trisphosphate binding;GO:0008017//microtubule binding;GO:0019901//protein kinase binding;GO:0043014//alpha-tubulin binding;GO:0043015//gamma-tubulin binding;GO:0046872//metal ion binding;GO:0048487//beta-tubulin binding	GO:0000281//mitotic cytokinesis;GO:0000915//actomyosin contractile ring assembly;GO:0007283//spermatogenesis;GO:0007405//neuroblast proliferation;GO:0008272//sulfate transport;GO:0032467//positive regulation of cytokinesis;GO:0035556//intracellular signal transduction;GO:0045995//regulation of embryonic development;GO:0051256//mitotic spindle midzone assembly;GO:0051988//regulation of attachment …
Sfur002924	73.973	13.06	5.09	PPAF2	Phenoloxidase-activating factor 2	-	-	-	-	GO:0005576//extracellular region	GO:0004252//serine-type endopeptidase activity;GO:0046872//metal ion binding	GO:0045087//innate immune response
Sfur003030	4.907	3.25	2.297	--	Putative uncharacterized protein	-	-	-	-	-	-	-
Sfur003280	2.873	1.503	1.12	--	Protein NATD1	-	-	-	-	-	-	-
Sfur003355	24.927	14.097	11.26	RABAC1	Prenylated Rab acceptor protein 1	-	-	-	-	GO:0005794//Golgi apparatus;GO:0005886//plasma membrane;GO:0008021//synaptic vesicle;GO:0016020//membrane;GO:0016021//integral component of membrane	GO:0008022//protein C-terminus binding;GO:0042802//identical protein binding;GO:0070064//proline-rich region binding	-
Sfur003607	8.603	3.613	2.62	caz	RNA-binding protein cabeza	Human Diseases	Cancers	ko05202//Transcriptional misregulation in cancers	K13098	GO:0005634//nucleus;GO:0005654//nucleoplasm;GO:0005669//transcription factor TFIID complex;GO:0071013//catalytic step 2 spliceosome	GO:0003682//chromatin binding;GO:0003712//transcription cofactor activity;GO:0003723//RNA binding;GO:0003729//mRNA binding;GO:0046872//metal ion binding	GO:0000398//mRNA splicing, via spliceosome;GO:0006355//regulation of transcription, DNA-templated;GO:0006367//transcription initiation from RNA polymerase II promoter;GO:0008344//adult locomotory behavior;GO:0008345//larval locomotory behavior;GO:0045887//positive regulation of synaptic growth at neuromuscular junction;GO:0048749//compound eye development;GO:0051124//synaptic growth at neuromuscu…
Sfur003744	0.923	0.397	0.203	Psf2	Probable DNA replication complex GINS protein PSF2	-	-	-	-	GO:0000811//GINS complex;GO:0005634//nucleus;GO:0031298//replication fork protection complex;GO:0071162//CMG complex	-	GO:0000727//double-strand break repair via break-induced replication;GO:0006270//DNA replication initiation;GO:0006271//DNA strand elongation involved in DNA replication;GO:0030261//chromosome condensation;GO:0032508//DNA duplex unwinding;GO:0032784//regulation of DNA-templated transcription, elongation
Sfur003745	22.47	14.87	9.967	NSNH	Inosine-uridine preferring nucleoside hydrolase	Metabolism;Metabolism;Metabolism	Global and overview maps;Nucleotide metabolism;Metabolism of cofactors and vitamins	ko01100//Metabolic pathways;ko00230//Purine metabolism;ko00760//Nicotinate and nicotinamide metabolism	K01239;K01239;K01239	-	GO:0005509//calcium ion binding;GO:0008477//purine nucleosidase activity;GO:0045437//uridine nucleosidase activity;GO:0047724//inosine nucleosidase activity	GO:0009117//nucleotide metabolic process;GO:0043101//purine-containing compound salvage
Sfur003804	1.697	1.22	0.67	sad	Cytochrome P450 315a1, mitochondrial	Metabolism	Metabolism of terpenoids and polyketides	ko00981//Insect hormone biosynthesis	K10722	GO:0005634//nucleus;GO:0005739//mitochondrion;GO:0031966//mitochondrial membrane	GO:0005506//iron ion binding;GO:0016705//oxidoreductase activity, acting on paired donors, with incorporation or reduction of molecular oxygen;GO:0020037//heme binding;GO:0042768//ecdysteroid 2-hydroxylase activity	GO:0006697//ecdysone biosynthetic process;GO:0007391//dorsal closure;GO:0007417//central nervous system development;GO:0007494//midgut development;GO:0008045//motor neuron axon guidance;GO:0008258//head involution
Sfur003829	12.877	7.347	4.56	--	Tigger transposable element-derived protein 2	-	-	-	-	GO:0005634//nucleus	GO:0003677//DNA binding	-
Sfur003971	14.643	8.53	6.63	l(3)72Ab	Putative U5 small nuclear ribonucleoprotein 200 kDa helicase	Genetic Information Processing	Transcription	ko03040//Spliceosome	K12854	GO:0005634//nucleus;GO:0005681//spliceosomal complex;GO:0030532//small nuclear ribonucleoprotein complex;GO:0071011//precatalytic spliceosome;GO:0071013//catalytic step 2 spliceosome	GO:0003723//RNA binding;GO:0003724//RNA helicase activity;GO:0005524//ATP binding	GO:0000278//mitotic cell cycle;GO:0000381//regulation of alternative mRNA splicing, via spliceosome;GO:0000388//spliceosome conformational change to release U4 (or U4atac) and U1 (or U11);GO:0000398//mRNA splicing, via spliceosome;GO:0007283//spermatogenesis;GO:0007419//ventral cord development;GO:0008380//RNA splicing
Sfur003975	6.53	3.783	3.093	AGAP002062	Protein FAM50 homolog	-	-	-	-	GO:0005634//nucleus	-	GO:0006325//chromatin organization
Sfur003991	2.627	1.19	0.707	Ift140	Intraflagellar transport protein 140 homolog	-	-	-	-	GO:0001750//photoreceptor outer segment;GO:0005813//centrosome;GO:0005814//centriole;GO:0005929//cilium;GO:0005930//axoneme;GO:0030991//intraciliary transport particle A;GO:0032391//photoreceptor connecting cilium;GO:0036064//ciliary basal body	-	GO:0007368//determination of left/right symmetry;GO:0007507//heart development;GO:0008589//regulation of smoothened signaling pathway;GO:0021532//neural tube patterning;GO:0031076//embryonic camera-type eye development;GO:0035108//limb morphogenesis;GO:0035721//intraciliary retrograde transport;GO:0035845//photoreceptor cell outer segment organization;GO:0042073//intraciliary transport;GO:0042733…
Sfur004047	5.043	3.523	2.18	--	Pogo transposable element with ZNF domain	-	-	-	-	GO:0000790//nuclear chromatin;GO:0005634//nucleus;GO:0005654//nucleoplasm;GO:0005737//cytoplasm;GO:0005829//cytosol	GO:0003677//DNA binding;GO:0046872//metal ion binding	GO:0007064//mitotic sister chromatid cohesion;GO:0010468//regulation of gene expression;GO:0045944//positive regulation of transcription from RNA polymerase II promoter;GO:0051301//cell division;GO:0051382//kinetochore assembly
Sfur004181	13.107	7.38	5.95	ORMDL	ORM1-like protein	-	-	-	-	GO:0005789//endoplasmic reticulum membrane;GO:0005829//cytosol;GO:0016021//integral component of membrane;GO:0035339//SPOTS complex	-	GO:0006672//ceramide metabolic process;GO:0090156//cellular sphingolipid homeostasis;GO:1900060//negative regulation of ceramide biosynthetic process
Sfur004182	24.257	10.463	3.87	--	Putative uncharacterized protein	-	-	-	-	-	-	-
Sfur004268	9.45	5.45	4.213	Slc33a1	Acetyl-coenzyme A transporter 1	Metabolism;Metabolism	Global and overview maps;Glycan biosynthesis and metabolism	ko01100//Metabolic pathways;ko00604//Glycosphingolipid biosynthesis - ganglio series	K03372;K03372	GO:0005789//endoplasmic reticulum membrane;GO:0016021//integral component of membrane	GO:0008521//acetyl-CoA transporter activity;GO:0015295//solute:proton symporter activity	GO:0007417//central nervous system development;GO:0030509//BMP signaling pathway;GO:0060395//SMAD protein signal transduction
Sfur004407	9.257	4.35	3.107	XDH	Xanthine dehydrogenase	Metabolism;Metabolism;Cellular Processes;Metabolism;Metabolism	Global and overview maps;Nucleotide metabolism;Transport and catabolism;Xenobiotics biodegradation and metabolism;Biosynthesis of other secondary metabolites	ko01100//Metabolic pathways;ko00230//Purine metabolism;ko04146//Peroxisome;ko00983//Drug metabolism - other enzymes;ko00232//Caffeine metabolism	K00106;K00106;K00106;K00106;K00106	-	GO:0004854//xanthine dehydrogenase activity;GO:0005506//iron ion binding;GO:0009055//electron carrier activity;GO:0051537//2 iron, 2 sulfur cluster binding;GO:0071949//FAD binding	-
Sfur004612	7.24	3.847	2.79	pabpn1-a	Polyadenylate-binding protein 2	Genetic Information Processing;Human Diseases	Translation;Infectious diseases	ko03015//mRNA surveillance pathway;ko05164//Influenza A	K14396;K14396	GO:0005634//nucleus;GO:0005737//cytoplasm;GO:0016607//nuclear speck;GO:0042405//nuclear inclusion body;GO:1990904//ribonucleoprotein complex	GO:0003723//RNA binding;GO:0043621//protein self-association;GO:0070063//RNA polymerase binding	GO:0000165//MAPK cascade;GO:0006397//mRNA processing;GO:0071222//cellular response to lipopolysaccharide;GO:1904247//positive regulation of polynucleotide adenylyltransferase activity
Sfur004788	174.557	107.533	85.65	Psmb2	Proteasome subunit beta type-2	Genetic Information Processing	Folding, sorting and degradation	ko03050//Proteasome	K02734	GO:0000502//proteasome complex;GO:0005634//nucleus;GO:0005654//nucleoplasm;GO:0005737//cytoplasm;GO:0005839//proteasome core complex;GO:0019774//proteasome core complex, beta-subunit complex	GO:0004175//endopeptidase activity;GO:0004298//threonine-type endopeptidase activity	GO:0010243//response to organonitrogen compound;GO:0010498//proteasomal protein catabolic process;GO:0010499//proteasomal ubiquitin-independent protein catabolic process;GO:0014070//response to organic cyclic compound;GO:0043161//proteasome-mediated ubiquitin-dependent protein catabolic process
Sfur004849	10.813	7.11	5.35	--	Putative uncharacterized protein	-	-	-	-	-	-	-
Sfur004964	1.347	0.733	0.52	RTCA	RNA 3'-terminal phosphate cyclase	-	-	-	-	GO:0005654//nucleoplasm	GO:0003963//RNA-3'-phosphate cyclase activity;GO:0005524//ATP binding	GO:0006396//RNA processing
Sfur004981	2.643	2.003	1.253	--	Putative uncharacterized protein	Genetic Information Processing	Translation	ko03013//RNA transport	K14288	-	-	-
Sfur005017	2.6	1.023	0.543	--	Putative uncharacterized protein	-	-	-	-	-	-	-
Sfur005078	33.427	19.4	13.817	TAF13	Transcription initiation factor TFIID subunit 13	Genetic Information Processing	Transcription	ko03022//Basal transcription factors	K03127	GO:0005634//nucleus	GO:0046982//protein heterodimerization activity	GO:0006366//transcription from RNA polymerase II promoter
Sfur005138	0.473	0.087	0	--	Transcription factor TFIIIB component B'' homolog	-	-	-	-	GO:0000126//transcription factor TFIIIB complex;GO:0005654//nucleoplasm	GO:0001156//TFIIIC-class transcription factor binding	GO:0070898//RNA polymerase III transcriptional preinitiation complex assembly
Sfur005342	9.357	4.43	2.45	--	Growth arrest and DNA damage-inducible protein GADD45 gamma	Human Diseases;Human Diseases;Environmental Information Processing;Cellular Processes;Human Diseases;Cellular Processes;Human Diseases;Cellular Processes;Environmental Information Processing;Human Diseases;Human Diseases;Human Diseases;Human Diseases;Human Diseases;Human Diseases;Cellular Processes;Human Diseases;Human Diseases;Human Diseases;Human Diseases;Environmental Information Processing;Hu…	Cancers;Cancers;Signal transduction;Cell growth and death;Infectious diseases;Cell growth and death;Cancers;Cell growth and death;Signal transduction;Cancers;Cancers;Cancers;Cancers;Cancers;Cancers;Cell growth and death;Cancers;Cancers;Cancers;Cancers;Signal transduction;Cancers;Cancers	ko05200//Pathways in cancer;ko05202//Transcriptional misregulation in cancers;ko04010//MAPK signaling pathway;ko04110//Cell cycle;ko05169//Epstein-Barr virus infection;ko04218//Cellular senescence;ko05225//Hepatocellular carcinoma;ko04210//Apoptosis;ko04068//FoxO signaling pathway;ko05226//Gastric cancer;ko05224//Breast cancer;ko05222//Small cell lung cancer;ko05210//Colorectal cancer;ko05220//Ch…	K04402;K04402;K04402;K04402;K04402;K04402;K04402;K04402;K04402;K04402;K04402;K04402;K04402;K04402;K04402;K04402;K04402;K04402;K04402;K04402;K04402;K04402;K04402	GO:0005634//nucleus;GO:0005737//cytoplasm	-	GO:0000185//activation of MAPKKK activity;GO:0006915//apoptotic process;GO:0007275//multicellular organism development;GO:0030154//cell differentiation;GO:0043065//positive regulation of apoptotic process;GO:0046330//positive regulation of JNK cascade;GO:0051726//regulation of cell cycle;GO:1900745//positive regulation of p38MAPK cascade
Sfur005470	83.093	32.993	23.247	--	Putative uncharacterized protein	-	-	-	-	-	-	-
Sfur005474	2.06	1.317	0.993	CNOT10	CCR4-NOT transcription complex subunit 10	Genetic Information Processing	Folding, sorting and degradation	ko03018//RNA degradation	K12607	GO:0030014//CCR4-NOT complex	-	GO:0006402//mRNA catabolic process;GO:0017148//negative regulation of translation
Sfur005514	11.413	7.723	5.47	CBWD2	COBW domain-containing protein 2	-	-	-	-	GO:0005737//cytoplasm	GO:0005524//ATP binding	-
Sfur005516	19.037	8.367	5.757	LSM6	U6 snRNA-associated Sm-like protein LSm6	Genetic Information Processing;Genetic Information Processing	Transcription;Folding, sorting and degradation	ko03040//Spliceosome;ko03018//RNA degradation	K12625;K12625	GO:0000932//cytoplasmic mRNA processing body;GO:0005634//nucleus;GO:0005654//nucleoplasm;GO:0005688//U6 snRNP;GO:0005730//nucleolus;GO:0005732//small nucleolar ribonucleoprotein complex;GO:0005737//cytoplasm;GO:0005829//cytosol;GO:0030532//small nuclear ribonucleoprotein complex;GO:0046540//U4/U6 x U5 tri-snRNP complex;GO:0071005//U2-type precatalytic spliceosome	GO:0003723//RNA binding;GO:0046982//protein heterodimerization activity	GO:0000398//mRNA splicing, via spliceosome;GO:0006402//mRNA catabolic process;GO:0008033//tRNA processing;GO:0008380//RNA splicing;GO:0030490//maturation of SSU-rRNA;GO:0043928//exonucleolytic nuclear-transcribed mRNA catabolic process involved in deadenylation-dependent decay
Sfur005538	9.94	5.76	3.937	UBE2T	Ubiquitin-conjugating enzyme E2 T	Genetic Information Processing	Replication and repair	ko03460//Fanconi anemia pathway	K13960	GO:0005634//nucleus;GO:0005654//nucleoplasm;GO:0005730//nucleolus	GO:0003682//chromatin binding;GO:0004842//ubiquitin-protein transferase activity;GO:0005524//ATP binding;GO:0031625//ubiquitin protein ligase binding;GO:0061631//ubiquitin conjugating enzyme activity	GO:0000209//protein polyubiquitination;GO:0006281//DNA repair;GO:0006513//protein monoubiquitination;GO:0006974//cellular response to DNA damage stimulus;GO:0016567//protein ubiquitination;GO:0035519//protein K29-linked ubiquitination;GO:0036297//interstrand cross-link repair;GO:0044314//protein K27-linked ubiquitination;GO:0051865//protein autoubiquitination;GO:0070534//protein K63-linked ubiqui…
Sfur005590	3.01	1.517	0.817	Ino80c	INO80 complex subunit C	-	-	-	-	GO:0031011//Ino80 complex;GO:0071339//MLL1 complex	-	GO:0006281//DNA repair;GO:0006310//DNA recombination;GO:0006338//chromatin remodeling
Sfur005656	4.39	2.693	2.193	--	Putative uncharacterized protein	-	-	-	-	-	-	-
Sfur005695	1.37	0.737	0.557	DCLRE1C	Protein artemis	Genetic Information Processing;Human Diseases	Replication and repair;Immune diseases	ko03450//Non-homologous end-joining;ko05340//Primary immunodeficiency	K10887;K10887	GO:0000784//nuclear chromosome, telomeric region;GO:0005654//nucleoplasm;GO:0005794//Golgi apparatus;GO:0070419//nonhomologous end joining complex	GO:0000014//single-stranded DNA endodeoxyribonuclease activity;GO:0003684//damaged DNA binding;GO:0035312//5'-3' exodeoxyribonuclease activity	GO:0002250//adaptive immune response;GO:0006303//double-strand break repair via nonhomologous end joining;GO:0010212//response to ionizing radiation;GO:0030183//B cell differentiation;GO:0031848//protection from non-homologous end joining at telomere;GO:0033151//V(D)J recombination;GO:0036297//interstrand cross-link repair
Sfur005707	4.543	2.13	1.477	--	Putative uncharacterized protein	-	-	-	-	-	-	-
Sfur005789	418.793	242.83	137.74	--	Putative uncharacterized protein	-	-	-	-	-	-	-
Sfur005794	32.86	19.633	15.643	PFDN1	Prefoldin subunit 1	-	-	-	-	GO:0005829//cytosol;GO:0016272//prefoldin complex	GO:0044183//protein binding involved in protein folding;GO:0051082//unfolded protein binding	-
Sfur005802	0.727	0.37	0.247	--	Putative uncharacterized protein	-	-	-	-	-	-	-
Sfur005809	33.18	20.693	15.753	Ccnq	Cyclin-Q	-	-	-	-	GO:0005634//nucleus	GO:0016538//cyclin-dependent protein serine/threonine kinase regulator activity;GO:0030295//protein kinase activator activity	GO:0006357//regulation of transcription from RNA polymerase II promoter;GO:0043410//positive regulation of MAPK cascade
Sfur005895	25.417	13.213	10.3	RpII18	DNA-directed RNA polymerases I, II, and III subunit RPABC2	Human Diseases;Genetic Information Processing;Organismal Systems	Neurodegenerative diseases;Transcription;Immune system	ko05016//Huntington disease;ko03020//RNA polymerase;ko04623//Cytosolic DNA-sensing pathway	K03014;K03014;K03014	GO:0005665//DNA-directed RNA polymerase II, core complex;GO:0005666//DNA-directed RNA polymerase III complex;GO:0005736//DNA-directed RNA polymerase I complex	GO:0003677//DNA binding;GO:0003899//DNA-directed RNA polymerase activity	GO:0006360//transcription from RNA polymerase I promoter;GO:0006366//transcription from RNA polymerase II promoter;GO:0042797//tRNA transcription from RNA polymerase III promoter
Sfur005969	65.16	38.243	26.413	PSMC4	26S proteasome regulatory subunit 6B	Human Diseases;Genetic Information Processing	Infectious diseases;Folding, sorting and degradation	ko05169//Epstein-Barr virus infection;ko03050//Proteasome	K03063;K03063	GO:0000502//proteasome complex;GO:0005634//nucleus;GO:0005737//cytoplasm	GO:0005524//ATP binding;GO:0036402//proteasome-activating ATPase activity	GO:0030163//protein catabolic process
Sfur005989	43.8	13.697	8.57	LCP17	Endocuticle structural glycoprotein SgAbd-2	-	-	-	-	-	GO:0042302//structural constituent of cuticle	-
Sfur006020	9.203	5.18	3.983	ANAPC1	Anaphase-promoting complex subunit 1	Human Diseases;Genetic Information Processing;Cellular Processes;Cellular Processes;Organismal Systems	Infectious diseases;Folding, sorting and degradation;Cell growth and death;Cell growth and death;Endocrine system	ko05166//HTLV-I infection;ko04120//Ubiquitin mediated proteolysis;ko04110//Cell cycle;ko04114//Oocyte meiosis;ko04914//Progesterone-mediated oocyte maturation	K03348;K03348;K03348;K03348;K03348	GO:0005654//nucleoplasm;GO:0005680//anaphase-promoting complex;GO:0005829//cytosol	GO:0060090//binding, bridging	GO:0006511//ubiquitin-dependent protein catabolic process;GO:0007091//metaphase/anaphase transition of mitotic cell cycle;GO:0031145//anaphase-promoting complex-dependent proteasomal ubiquitin-dependent protein catabolic process;GO:0051301//cell division;GO:0070979//protein K11-linked ubiquitination;GO:1901990//regulation of mitotic cell cycle phase transition
Sfur006045	120.887	64.957	47.053	LCP17	Endocuticle structural glycoprotein SgAbd-8	-	-	-	-	-	GO:0042302//structural constituent of cuticle	-
Sfur006084	0.383	0.023	0.007	--	Putative uncharacterized protein	-	-	-	-	-	-	-
Sfur006115	34.013	25.713	15.757	TMEM50B	Transmembrane protein 50A	-	-	-	-	GO:0005737//cytoplasm;GO:0005783//endoplasmic reticulum;GO:0016021//integral component of membrane;GO:0043025//neuronal cell body;GO:0097386//glial cell projection	-	GO:0032511//late endosome to vacuole transport via multivesicular body sorting pathway
Sfur006151	12.603	7.003	4.987	4cl3	Probable 4-coumarate--CoA ligase 3	Metabolism;Metabolism	Global and overview maps;Metabolism of cofactors and vitamins	ko01100//Metabolic pathways;ko00130//Ubiquinone and other terpenoid-quinone biosynthesis	K01904;K01904	-	GO:0005524//ATP binding;GO:0016207//4-coumarate-CoA ligase activity;GO:0016405//CoA-ligase activity	GO:0009698//phenylpropanoid metabolic process
Sfur006194	11.507	3.32	1.687	--	Organic solute transporter alpha-like protein	Organismal Systems	Digestive system	ko04976//Bile secretion	K14360	GO:0005886//plasma membrane;GO:0016021//integral component of membrane	-	-
Sfur006211	6.81	0.097	0	--	Putative uncharacterized protein	-	-	-	-	-	-	-
Sfur006228	0.75	0.047	0	--	Putative uncharacterized protein	-	-	-	-	-	-	-
Sfur006235	6.51	3.22	2.217	Cse1	Exportin-2	Human Diseases	Infectious diseases	ko05132//Salmonella infection	K18423	GO:0005635//nuclear envelope;GO:0005654//nucleoplasm;GO:0005829//cytosol	GO:0005049//nuclear export signal receptor activity;GO:0008536//Ran GTPase binding	GO:0006606//protein import into nucleus;GO:0006611//protein export from nucleus
Sfur006362	3.71	2.31	1.65	SYMPK	Symplekin	Cellular Processes;Genetic Information Processing	Cellular community - eukaryotes;Translation	ko04530//Tight junction;ko03015//mRNA surveillance pathway	K06100;K06100	GO:0005654//nucleoplasm;GO:0005737//cytoplasm;GO:0005829//cytosol;GO:0005847//mRNA cleavage and polyadenylation specificity factor complex;GO:0005856//cytoskeleton;GO:0005886//plasma membrane;GO:0005923//bicellular tight junction;GO:0097165//nuclear stress granule	-	GO:0000398//mRNA splicing, via spliceosome;GO:0006369//termination of RNA polymerase II transcription;GO:0006378//mRNA polyadenylation;GO:0006406//mRNA export from nucleus;GO:0007155//cell adhesion;GO:0031124//mRNA 3'-end processing;GO:0032091//negative regulation of protein binding;GO:0035307//positive regulation of protein dephosphorylation
Sfur006366	3.567	1.837	1.393	--	Putative uncharacterized protein	Genetic Information Processing	Translation	ko03013//RNA transport	K14288	-	-	-
Sfur006568	3.453	1.743	0.95	GIP	Retrovirus-related Pol polyprotein from transposon TNT 1-94	Human Diseases	Neurodegenerative diseases	ko05016//Huntington disease	K10408	-	GO:0003676//nucleic acid binding;GO:0003964//RNA-directed DNA polymerase activity;GO:0004190//aspartic-type endopeptidase activity;GO:0004519//endonuclease activity;GO:0008270//zinc ion binding	GO:0015074//DNA integration
Sfur006651	1.283	0.637	0.303	--	Uncharacterized 50 kDa protein in type I retrotransposable element R1DM	-	-	-	-	-	GO:0003676//nucleic acid binding;GO:0008270//zinc ion binding	-
Sfur006826	22.777	8.397	5.673	CG40228	Transcription elongation factor 1 homolog	-	-	-	-	GO:0008023//transcription elongation factor complex	GO:0000993//RNA polymerase II core binding;GO:0046872//metal ion binding	GO:0006368//transcription elongation from RNA polymerase II promoter;GO:0048096//chromatin-mediated maintenance of transcription
Sfur007561	12.023	5.117	3.247	ASZ1	Ankyrin repeat, SAM and basic leucine zipper domain-containing protein 1	-	-	-	-	GO:0005737//cytoplasm;GO:0005829//cytosol;GO:0071546//pi-body	-	GO:0007140//male meiosis;GO:0007275//multicellular organism development;GO:0007281//germ cell development;GO:0007283//spermatogenesis;GO:0031047//gene silencing by RNA;GO:0034587//piRNA metabolic process;GO:0043046//DNA methylation involved in gamete generation
Sfur007656	25.233	8.603	4.593	nas-7	Zinc metalloproteinase nas-15	-	-	-	-	GO:0005576//extracellular region	GO:0004222//metalloendopeptidase activity;GO:0008270//zinc ion binding	-
Sfur007759	142.603	70.59	45.357	--	U-scoloptoxin(01)-Er1a	Human Diseases	Neurodegenerative diseases	ko05016//Huntington disease	K10408	GO:0005576//extracellular region	GO:0008061//chitin binding	-
Sfur007796	2.113	0.847	0.53	--	Probable RNA-directed DNA polymerase from transposon BS	-	-	-	-	-	GO:0003964//RNA-directed DNA polymerase activity	GO:0006313//transposition, DNA-mediated
Sfur007851	3.503	1.977	1.5	--	Putative uncharacterized protein	-	-	-	-	-	-	-
Sfur007863	5.19	3.293	2.463	--	Putative uncharacterized protein	Genetic Information Processing	Folding, sorting and degradation	ko04122//Sulfur relay system	K11996	-	-	-
Sfur007930	79.507	28.827	18.553	--	Putative uncharacterized protein	-	-	-	-	-	-	-
Sfur007979	8.2	4.19	2.893	--	Putative uncharacterized protein	-	-	-	-	-	-	-
Sfur008014	0.967	0.093	0	MP1	Transmembrane protease serine 3	-	-	-	-	GO:0005783//endoplasmic reticulum;GO:0005789//endoplasmic reticulum membrane;GO:0016021//integral component of membrane;GO:0043025//neuronal cell body	GO:0004252//serine-type endopeptidase activity;GO:0005044//scavenger receptor activity;GO:0017080//sodium channel regulator activity	GO:0006883//cellular sodium ion homeostasis;GO:0007605//sensory perception of sound
Sfur008019	120.503	78.327	58.927	--	Putative uncharacterized protein	-	-	-	-	-	-	-
Sfur008118	6.98	3.897	2.903	NELF-B	Negative elongation factor B	-	-	-	-	GO:0005634//nucleus;GO:0005694//chromosome;GO:0017053//transcriptional repressor complex;GO:0032021//NELF complex	GO:0003723//RNA binding	GO:0000122//negative regulation of transcription from RNA polymerase II promoter;GO:0034244//negative regulation of transcription elongation from RNA polymerase II promoter;GO:0045944//positive regulation of transcription from RNA polymerase II promoter
Sfur008125	6.553	3.49	2.323	Wdr35	WD repeat-containing protein 35	-	-	-	-	GO:0005737//cytoplasm;GO:0005813//centrosome;GO:0005930//axoneme;GO:0030991//intraciliary transport particle A;GO:0036064//ciliary basal body	-	GO:0009636//response to toxic substance;GO:0010629//negative regulation of gene expression;GO:0032496//response to lipopolysaccharide;GO:0035721//intraciliary retrograde transport;GO:0042073//intraciliary transport;GO:0043065//positive regulation of apoptotic process;GO:0043280//positive regulation of cysteine-type endopeptidase activity involved in apoptotic process;GO:0045019//negative regulati…
Sfur008183	4.647	2.577	1.957	kappaB-Ras	NF-kappa-B inhibitor-interacting Ras-like protein	-	-	-	-	-	GO:0005525//GTP binding	GO:0007249//I-kappaB kinase/NF-kappaB signaling;GO:0043124//negative regulation of I-kappaB kinase/NF-kappaB signaling
Sfur008211	12.253	5.073	3.597	VAT1L	Synaptic vesicle membrane protein VAT-1	-	-	-	-	GO:0030672//synaptic vesicle membrane	GO:0008270//zinc ion binding;GO:0016491//oxidoreductase activity	-
Sfur008397	11.597	5.853	4.55	ergic3	Endoplasmic reticulum-Golgi intermediate compartment protein 3	-	-	-	-	GO:0005783//endoplasmic reticulum;GO:0030134//ER to Golgi transport vesicle;GO:0030173//integral component of Golgi membrane;GO:0030176//integral component of endoplasmic reticulum membrane;GO:0033116//endoplasmic reticulum-Golgi intermediate compartment membrane	-	GO:0006888//ER to Golgi vesicle-mediated transport;GO:0006890//retrograde vesicle-mediated transport, Golgi to ER
Sfur008400	1.923	1.13	0.807	TMT1	Putative methyltransferase DDB_G0268948	-	-	-	-	GO:0045335//phagocytic vesicle	GO:0008168//methyltransferase activity	GO:0032259//methylation
Sfur008590	17.157	5.1	2.707	Rbm45	RNA-binding protein 45	Metabolism;Metabolism	Global and overview maps;Glycan biosynthesis and metabolism	ko01100//Metabolic pathways;ko00603//Glycosphingolipid biosynthesis - globo and isoglobo series	K00722;K00722	GO:0005634//nucleus;GO:0005654//nucleoplasm;GO:0005737//cytoplasm;GO:1990904//ribonucleoprotein complex	GO:0003723//RNA binding;GO:0042802//identical protein binding	GO:0007399//nervous system development;GO:0030154//cell differentiation
Sfur008678	27.877	16.093	11.54	CRAT	Carnitine O-acetyltransferase	Cellular Processes	Transport and catabolism	ko04146//Peroxisome	K00624	GO:0005739//mitochondrion;GO:0005743//mitochondrial inner membrane;GO:0005777//peroxisome;GO:0005782//peroxisomal matrix;GO:0005783//endoplasmic reticulum;GO:0005829//cytosol	GO:0003997//acyl-CoA oxidase activity;GO:0004092//carnitine O-acetyltransferase activity;GO:0008458//carnitine O-octanoyltransferase activity	GO:0006625//protein targeting to peroxisome;GO:0019254//carnitine metabolic process, CoA-linked;GO:0033540//fatty acid beta-oxidation using acyl-CoA oxidase;GO:0046459//short-chain fatty acid metabolic process;GO:0051791//medium-chain fatty acid metabolic process
Sfur008733	1.04	0.49	0.297	CG7457	Tonsoku-like protein	-	-	-	-	-	-	-
Sfur008782	9.883	5.76	4.377	Nup37	Nucleoporin Nup37	Genetic Information Processing	Translation	ko03013//RNA transport	K14302	GO:0000777//condensed chromosome kinetochore;GO:0005654//nucleoplasm;GO:0031080//nuclear pore outer ring	-	GO:0007049//cell cycle;GO:0007059//chromosome segregation;GO:0015031//protein transport;GO:0051028//mRNA transport;GO:0051301//cell division
Sfur008909	8.377	5.847	3.81	Mphosph6	M-phase phosphoprotein 6	Genetic Information Processing	Folding, sorting and degradation	ko03018//RNA degradation	K12593	GO:0000176//nuclear exosome (RNase complex);GO:0000178//exosome (RNase complex);GO:0005634//nucleus;GO:0005654//nucleoplasm;GO:0005730//nucleolus;GO:0005829//cytosol	GO:0003723//RNA binding	GO:0000460//maturation of 5.8S rRNA
Sfur008919	4.143	1.907	1.367	--	Uncharacterized protein C12B10.15c	Genetic Information Processing	Replication and repair	ko03030//DNA replication	K10745	GO:0005634//nucleus;GO:0005829//cytosol;GO:0032299//ribonuclease H2 complex	-	GO:0090502//RNA phosphodiester bond hydrolysis, endonucleolytic;GO:1903469//removal of RNA primer involved in mitotic DNA replication
Sfur008940	2.117	1.17	0.8	ORC5	Origin recognition complex subunit 5	Cellular Processes	Cell growth and death	ko04110//Cell cycle	K02607	GO:0000784//nuclear chromosome, telomeric region;GO:0000785//chromatin;GO:0000808//origin recognition complex;GO:0005634//nucleus;GO:0005654//nucleoplasm;GO:0005664//nuclear origin of replication recognition complex;GO:0005829//cytosol	GO:0000166//nucleotide binding;GO:0003688//DNA replication origin binding;GO:0005524//ATP binding	GO:0000082//G1/S transition of mitotic cell cycle;GO:0006260//DNA replication;GO:0006270//DNA replication initiation;GO:0006275//regulation of DNA replication
Sfur009039	6.703	4.517	3.317	PMVK	Phosphomevalonate kinase	Metabolism;Cellular Processes;Metabolism	Global and overview maps;Transport and catabolism;Metabolism of terpenoids and polyketides	ko01100//Metabolic pathways;ko04146//Peroxisome;ko00900//Terpenoid backbone biosynthesis	K13273;K13273;K13273	GO:0005777//peroxisome;GO:0005829//cytosol	GO:0004631//phosphomevalonate kinase activity;GO:0005524//ATP binding	GO:0006695//cholesterol biosynthetic process;GO:0019287//isopentenyl diphosphate biosynthetic process, mevalonate pathway;GO:0070723//response to cholesterol
Sfur009111	4.613	2.64	1.98	--	Putative uncharacterized protein	-	-	-	-	-	-	-
Sfur009115	3.413	1.483	1.043	Ift140	Intraflagellar transport protein 140 homolog	-	-	-	-	GO:0001750//photoreceptor outer segment;GO:0005813//centrosome;GO:0005814//centriole;GO:0005929//cilium;GO:0005930//axoneme;GO:0030991//intraciliary transport particle A;GO:0032391//photoreceptor connecting cilium;GO:0036064//ciliary basal body	-	GO:0007368//determination of left/right symmetry;GO:0007507//heart development;GO:0008589//regulation of smoothened signaling pathway;GO:0021532//neural tube patterning;GO:0031076//embryonic camera-type eye development;GO:0035108//limb morphogenesis;GO:0035721//intraciliary retrograde transport;GO:0035845//photoreceptor cell outer segment organization;GO:0042073//intraciliary transport;GO:0042733…
Sfur009198	2760.68	1831.64	1347.31	Rpl35	60S ribosomal protein L35	Genetic Information Processing	Translation	ko03010//Ribosome	K02918	GO:0022625//cytosolic large ribosomal subunit	GO:0003729//mRNA binding;GO:0003735//structural constituent of ribosome;GO:0043021//ribonucleoprotein complex binding	GO:0000463//maturation of LSU-rRNA from tricistronic rRNA transcript (SSU-rRNA, 5.8S rRNA, LSU-rRNA);GO:0006412//translation
Sfur009201	4.043	1.82	1.337	--	LINE-1 retrotransposable element ORF2 protein	Organismal Systems	Sensory system	ko04745//Phototransduction - fly	K08834	-	GO:0003964//RNA-directed DNA polymerase activity;GO:0009036//Type II site-specific deoxyribonuclease activity;GO:0046872//metal ion binding	GO:0006310//DNA recombination;GO:0032197//transposition, RNA-mediated;GO:0032199//reverse transcription involved in RNA-mediated transposition;GO:0090305//nucleic acid phosphodiester bond hydrolysis
Sfur009205	4.573	3.29	1.85	Uros	Uroporphyrinogen-III synthase	Metabolism;Metabolism	Global and overview maps;Metabolism of cofactors and vitamins	ko01100//Metabolic pathways;ko00860//Porphyrin and chlorophyll metabolism	K01719;K01719	GO:0005739//mitochondrion;GO:0005829//cytosol	GO:0004852//uroporphyrinogen-III synthase activity;GO:0005542//folic acid binding	GO:0006779//porphyrin-containing compound biosynthetic process;GO:0006780//uroporphyrinogen III biosynthetic process;GO:0006782//protoporphyrinogen IX biosynthetic process;GO:0006783//heme biosynthetic process;GO:0046677//response to antibiotic;GO:0070541//response to platinum ion;GO:0071243//cellular response to arsenic-containing substance;GO:0071418//cellular response to amine stimulus
Sfur009267	15.327	9.813	7.197	--	Putative uncharacterized protein	-	-	-	-	-	-	-
Sfur009431	5.327	3.293	2.087	GA19395	PITH domain-containing protein GA19395	-	-	-	-	-	-	-
Sfur009479	16.267	7.973	5.757	--	Putative uncharacterized protein	-	-	-	-	-	-	-
Sfur009493	176.203	103.97	79.923	PSMB6	Proteasome subunit beta type-6	Genetic Information Processing	Folding, sorting and degradation	ko03050//Proteasome	K02738	GO:0000502//proteasome complex;GO:0005634//nucleus;GO:0005654//nucleoplasm;GO:0005737//cytoplasm;GO:0005829//cytosol;GO:0005839//proteasome core complex;GO:0019774//proteasome core complex, beta-subunit complex;GO:0070062//extracellular exosome	GO:0004175//endopeptidase activity;GO:0004298//threonine-type endopeptidase activity;GO:0045296//cadherin binding	GO:0000165//MAPK cascade;GO:0000209//protein polyubiquitination;GO:0002223//stimulatory C-type lectin receptor signaling pathway;GO:0002479//antigen processing and presentation of exogenous peptide antigen via MHC class I, TAP-dependent;GO:0006521//regulation of cellular amino acid metabolic process;GO:0010498//proteasomal protein catabolic process;GO:0010499//proteasomal ubiquitin-independent pr…
Sfur009533	5.063	3.6	2.41	RCC1	Regulator of chromosome condensation	-	-	-	-	GO:0000785//chromatin;GO:0000790//nuclear chromatin;GO:0000794//condensed nuclear chromosome;GO:0005634//nucleus;GO:0005654//nucleoplasm;GO:0005737//cytoplasm;GO:0031965//nuclear membrane;GO:0032991//macromolecular complex	GO:0003682//chromatin binding;GO:0005087//Ran guanyl-nucleotide exchange factor activity;GO:0008536//Ran GTPase binding;GO:0031491//nucleosome binding;GO:0031492//nucleosomal DNA binding;GO:0042393//histone binding;GO:0043199//sulfate binding;GO:0046982//protein heterodimerization activity	GO:0000082//G1/S transition of mitotic cell cycle;GO:0007052//mitotic spindle organization;GO:0007059//chromosome segregation;GO:0007088//regulation of mitotic nuclear division;GO:0016032//viral process;GO:0031291//Ran protein signal transduction;GO:0051225//spindle assembly;GO:0051301//cell division;GO:1901673//regulation of mitotic spindle assembly
Sfur009694	36.927	20.563	15.723	--	Putative uncharacterized protein	-	-	-	-	-	-	-
Sfur009753	2.35	0.917	0.647	--	Protein escargot	Environmental Information Processing;Cellular Processes	Signal transduction;Cellular community - eukaryotes	ko04390//Hippo signaling pathway;ko04520//Adherens junction	K05706;K05706	GO:0005634//nucleus	GO:0000977//RNA polymerase II regulatory region sequence-specific DNA binding;GO:0000978//RNA polymerase II core promoter proximal region sequence-specific DNA binding;GO:0000981//RNA polymerase II transcription factor activity, sequence-specific DNA binding;GO:0001227//transcriptional repressor activity, RNA polymerase II transcription regulatory region sequence-specific binding;GO:0003677//DNA …	GO:0000122//negative regulation of transcription from RNA polymerase II promoter;GO:0001708//cell fate specification;GO:0001709//cell fate determination;GO:0006357//regulation of transcription from RNA polymerase II promoter;GO:0007417//central nervous system development;GO:0007424//open tracheal system development;GO:0007427//epithelial cell migration, open tracheal system;GO:0007489//maintenanc…
Sfur009796	21.407	11.67	7.903	cpnA	3-oxoacyl-[acyl-carrier-protein] reductase FabG	Metabolism;Metabolism;Metabolism;Metabolism	Global and overview maps;Global and overview maps;Carbohydrate metabolism;Metabolism of other amino acids	ko01100//Metabolic pathways;ko01200//Carbon metabolism;ko00640//Propanoate metabolism;ko00410//beta-Alanine metabolism	K14729;K14729;K14729;K14729	-	GO:0004316//3-oxoacyl-[acyl-carrier-protein] reductase (NADPH) activity;GO:0050661//NADP binding;GO:0051287//NAD binding	GO:0030497//fatty acid elongation
Sfur009918	3.373	1.867	1.293	--	Putative uncharacterized protein	Metabolism;Human Diseases;Human Diseases;Organismal Systems;Metabolism;Human Diseases;Metabolism;Human Diseases;Metabolism	Global and overview maps;Neurodegenerative diseases;Neurodegenerative diseases;Environmental adaptation;Global and overview maps;Neurodegenerative diseases;Energy metabolism;Endocrine and metabolic diseases;Carbohydrate metabolism	ko01100//Metabolic pathways;ko05010//Alzheimer disease;ko05016//Huntington disease;ko04714//Thermogenesis;ko01200//Carbon metabolism;ko05012//Parkinson disease;ko00190//Oxidative phosphorylation;ko04932//Non-alcoholic fatty liver disease (NAFLD);ko00020//Citrate cycle (TCA cycle)	K00234;K00234;K00234;K00234;K00234;K00234;K00234;K00234;K00234	-	-	-
Sfur009946	2.083	1.143	0.813	BMS1	Ribosome biogenesis protein BMS1 homolog	Genetic Information Processing	Translation	ko03008//Ribosome biogenesis in eukaryotes	K14569	GO:0005654//nucleoplasm;GO:0005730//nucleolus;GO:0030686//90S preribosome	GO:0003723//RNA binding;GO:0003924//GTPase activity;GO:0005524//ATP binding;GO:0005525//GTP binding;GO:0034511//U3 snoRNA binding	GO:0000462//maturation of SSU-rRNA from tricistronic rRNA transcript (SSU-rRNA, 5.8S rRNA, LSU-rRNA);GO:0000479//endonucleolytic cleavage of tricistronic rRNA transcript (SSU-rRNA, 5.8S rRNA, LSU-rRNA);GO:0006364//rRNA processing
Sfur009964	2.303	1.08	0.603	K02A2.6	Uncharacterized protein K02A2.6	-	-	-	-	-	GO:0003676//nucleic acid binding;GO:0008270//zinc ion binding	GO:0015074//DNA integration
Sfur010040	4.01	2.633	1.97	Dph7	Diphthine methyltransferase	-	-	-	-	-	GO:0061685//diphthine methylesterase activity	GO:0017183//peptidyl-diphthamide biosynthetic process from peptidyl-histidine
Sfur010097	24.917	14.91	11.813	snf	U1 small nuclear ribonucleoprotein A	Genetic Information Processing	Transcription	ko03040//Spliceosome	K11094	GO:0005634//nucleus;GO:0005681//spliceosomal complex;GO:0005685//U1 snRNP;GO:0005686//U2 snRNP;GO:0030532//small nuclear ribonucleoprotein complex;GO:0032991//macromolecular complex;GO:0071011//precatalytic spliceosome;GO:0071013//catalytic step 2 spliceosome;GO:1990904//ribonucleoprotein complex	GO:0003729//mRNA binding;GO:0008266//poly(U) RNA binding;GO:0030619//U1 snRNA binding;GO:0030620//U2 snRNA binding;GO:0035614//snRNA stem-loop binding;GO:0042802//identical protein binding;GO:0097158//pre-mRNA intronic pyrimidine-rich binding	GO:0000381//regulation of alternative mRNA splicing, via spliceosome;GO:0000398//mRNA splicing, via spliceosome;GO:0007539//primary sex determination, soma;GO:0008380//RNA splicing;GO:0019099//female germ-line sex determination;GO:0048477//oogenesis;GO:0070868//heterochromatin organization involved in chromatin silencing
Sfur010209	1.043	0.657	0.273	ccdc102a	Coiled-coil domain-containing protein 102A	-	-	-	-	GO:0016459//myosin complex	GO:0003774//motor activity	-
Sfur010231	2.763	1.73	1.043	--	Putative uncharacterized protein	Genetic Information Processing	Translation	ko03013//RNA transport	K14288	-	-	-
Sfur010237	186.367	106.02	79.903	PSMB1	Proteasome subunit beta type-1	Genetic Information Processing	Folding, sorting and degradation	ko03050//Proteasome	K02732	GO:0000502//proteasome complex;GO:0005576//extracellular region;GO:0005634//nucleus;GO:0005654//nucleoplasm;GO:0005737//cytoplasm;GO:0005829//cytosol;GO:0005839//proteasome core complex;GO:0019774//proteasome core complex, beta-subunit complex;GO:0034774//secretory granule lumen;GO:0070062//extracellular exosome;GO:1904813//ficolin-1-rich granule lumen	GO:0004175//endopeptidase activity;GO:0004298//threonine-type endopeptidase activity	GO:0000165//MAPK cascade;GO:0000209//protein polyubiquitination;GO:0002223//stimulatory C-type lectin receptor signaling pathway;GO:0002479//antigen processing and presentation of exogenous peptide antigen via MHC class I, TAP-dependent;GO:0006521//regulation of cellular amino acid metabolic process;GO:0010498//proteasomal protein catabolic process;GO:0010499//proteasomal ubiquitin-independent pr…
Sfur010464	69.833	38.683	26.59	SmD1	Probable small nuclear ribonucleoprotein Sm D1	Genetic Information Processing;Human Diseases	Transcription;Immune diseases	ko03040//Spliceosome;ko05322//Systemic lupus erythematosus	K11087;K11087	GO:0000243//commitment complex;GO:0005634//nucleus;GO:0005681//spliceosomal complex;GO:0005682//U5 snRNP;GO:0005685//U1 snRNP;GO:0005686//U2 snRNP;GO:0005687//U4 snRNP;GO:0005689//U12-type spliceosomal complex;GO:0005829//cytosol;GO:0030532//small nuclear ribonucleoprotein complex;GO:0034715//pICln-Sm protein complex;GO:0034719//SMN-Sm protein complex;GO:0071011//precatalytic spliceosome;GO:00710…	GO:0003723//RNA binding	GO:0000387//spliceosomal snRNP assembly;GO:0000398//mRNA splicing, via spliceosome
Sfur010468	0.377	0.113	0.03	RTase	LINE-1 retrotransposable element ORF2 protein	-	-	-	-	-	GO:0003964//RNA-directed DNA polymerase activity;GO:0009036//Type II site-specific deoxyribonuclease activity;GO:0046872//metal ion binding	GO:0006310//DNA recombination;GO:0032197//transposition, RNA-mediated;GO:0032199//reverse transcription involved in RNA-mediated transposition;GO:0090305//nucleic acid phosphodiester bond hydrolysis
Sfur010562	62.523	31.76	20.467	LSM5	U6 snRNA-associated Sm-like protein LSm5	Genetic Information Processing;Genetic Information Processing	Transcription;Folding, sorting and degradation	ko03040//Spliceosome;ko03018//RNA degradation	K12624;K12624	GO:0005634//nucleus;GO:0005688//U6 snRNP;GO:0046540//U4/U6 x U5 tri-snRNP complex;GO:0071005//U2-type precatalytic spliceosome;GO:1990726//Lsm1-7-Pat1 complex	GO:0003723//RNA binding	GO:0000398//mRNA splicing, via spliceosome
Sfur010700	3.397	2.017	1.567	CG15084	Coiled-coil domain-containing protein 130 homolog	-	-	-	-	GO:0005684//U2-type spliceosomal complex;GO:0071014//post-mRNA release spliceosomal complex	-	GO:0008380//RNA splicing
Sfur010837	14.08	7.007	4.92	Manf	Mesencephalic astrocyte-derived neurotrophic factor homolog	-	-	-	-	GO:0005576//extracellular region;GO:0005783//endoplasmic reticulum;GO:0045202//synapse	-	GO:0001963//synaptic transmission, dopaminergic;GO:0031175//neuron projection development;GO:0042417//dopamine metabolic process;GO:0070050//neuron cellular homeostasis
Sfur010876	5.227	3.26	2.587	Man1b1	Endoplasmic reticulum mannosyl-oligosaccharide 1,2-alpha-mannosidase	Metabolism;Genetic Information Processing;Metabolism;Metabolism	Global and overview maps;Folding, sorting and degradation;Glycan biosynthesis and metabolism;Glycan biosynthesis and metabolism	ko01100//Metabolic pathways;ko04141//Protein processing in endoplasmic reticulum;ko00513//Various types of N-glycan biosynthesis;ko00510//N-Glycan biosynthesis	K23741;K23741;K23741;K23741	GO:0005783//endoplasmic reticulum;GO:0005789//endoplasmic reticulum membrane;GO:0016020//membrane;GO:0016021//integral component of membrane;GO:0044322//endoplasmic reticulum quality control compartment	GO:0004571//mannosyl-oligosaccharide 1,2-alpha-mannosidase activity;GO:0005509//calcium ion binding	GO:0005975//carbohydrate metabolic process;GO:0006486//protein glycosylation;GO:0006491//N-glycan processing;GO:0030433//ER-associated ubiquitin-dependent protein catabolic process;GO:0036508//protein alpha-1,2-demannosylation;GO:0036509//trimming of terminal mannose on B branch;GO:1904380//endoplasmic reticulum mannose trimming;GO:1904382//mannose trimming involved in glycoprotein ERAD pathway
Sfur010879	1.63	0.963	0.663	ccdc102a	Coiled-coil domain-containing protein 102A	-	-	-	-	GO:0016459//myosin complex	GO:0003774//motor activity	-
Sfur010893	4.757	3.42	2.367	TREX1	Three-prime repair exonuclease 1	Organismal Systems	Immune system	ko04623//Cytosolic DNA-sensing pathway	K10790	GO:0005634//nucleus;GO:0005789//endoplasmic reticulum membrane;GO:0005829//cytosol	GO:0003676//nucleic acid binding;GO:0008296//3'-5'-exodeoxyribonuclease activity;GO:0008408//3'-5' exonuclease activity;GO:0008853//exodeoxyribonuclease III activity;GO:0046872//metal ion binding	GO:0006259//DNA metabolic process;GO:0007049//cell cycle
Sfur010942	21.34	10.74	8.09	ubxn-1	UBX domain-containing protein 1	-	-	-	-	GO:0048471//perinuclear region of cytoplasm	GO:0036435//K48-linked polyubiquitin binding	GO:0007283//spermatogenesis;GO:0030154//cell differentiation;GO:0042006//masculinization of hermaphroditic germ-line;GO:1903364//positive regulation of cellular protein catabolic process
Sfur010969	0.217	0.013	0	--	Leucine-rich repeat, immunoglobulin-like domain and transmembrane domain-containing protein 2	Environmental Information Processing	Signal transduction	ko04013//MAPK signaling pathway - fly	K20230	GO:0016021//integral component of membrane	-	-
Sfur010975	14.363	8.713	6.67	UBE2F	NEDD8-conjugating enzyme UBE2F	Genetic Information Processing	Folding, sorting and degradation	ko04120//Ubiquitin mediated proteolysis	K10687	GO:0005634//nucleus	GO:0005524//ATP binding;GO:0019788//NEDD8 transferase activity;GO:0061631//ubiquitin conjugating enzyme activity;GO:0061654//NEDD8 conjugating enzyme activity	GO:0000209//protein polyubiquitination;GO:0045116//protein neddylation
Sfur011067	3.943	2.597	1.117	Adat2	tRNA-specific adenosine deaminase 2	-	-	-	-	GO:0052718//tRNA-specific adenosine-34 deaminase complex	GO:0008270//zinc ion binding;GO:0052717//tRNA-specific adenosine-34 deaminase activity	GO:0002100//tRNA wobble adenosine to inosine editing
Sfur011288	6.263	3.903	2.853	EXOSC7	Exosome complex component RRP42	Genetic Information Processing	Folding, sorting and degradation	ko03018//RNA degradation	K12589	GO:0000176//nuclear exosome (RNase complex);GO:0000177//cytoplasmic exosome (RNase complex);GO:0000178//exosome (RNase complex);GO:0005654//nucleoplasm;GO:0005730//nucleolus;GO:0005829//cytosol	GO:0000175//3'-5'-exoribonuclease activity;GO:0003723//RNA binding;GO:0017091//AU-rich element binding	GO:0000467//exonucleolytic trimming to generate mature 3'-end of 5.8S rRNA from tricistronic rRNA transcript (SSU-rRNA, 5.8S rRNA, LSU-rRNA);GO:0006364//rRNA processing;GO:0006401//RNA catabolic process;GO:0016075//rRNA catabolic process;GO:0034427//nuclear-transcribed mRNA catabolic process, exonucleolytic, 3'-5';GO:0034473//U1 snRNA 3'-end processing;GO:0034475//U4 snRNA 3'-end processing;GO:00…
Sfur011289	2.053	0.963	0.47	MTIF2	Translation initiation factor IF-2, mitochondrial	-	-	-	-	GO:0005654//nucleoplasm;GO:0005739//mitochondrion	GO:0003743//translation initiation factor activity;GO:0003924//GTPase activity;GO:0005525//GTP binding;GO:0008135//translation factor activity, RNA binding;GO:0043024//ribosomal small subunit binding	GO:0032790//ribosome disassembly;GO:0070124//mitochondrial translational initiation
Sfur011368	8.627	5.953	3.7	--	Putative uncharacterized protein	-	-	-	-	-	-	-
Sfur011458	19.773	10.707	8.53	csn8	COP9 signalosome complex subunit 8	-	-	-	-	GO:0005737//cytoplasm;GO:0008180//COP9 signalosome	-	GO:0000338//protein deneddylation;GO:0010387//COP9 signalosome assembly
Sfur011510	103.377	63.27	50.417	Rpt2	26S proteasome regulatory subunit 4	Human Diseases;Human Diseases;Human Diseases;Genetic Information Processing	Infectious diseases;Cancers;Infectious diseases;Folding, sorting and degradation	ko05165//Human papillomavirus infection;ko05203//Viral carcinogenesis;ko05169//Epstein-Barr virus infection;ko03050//Proteasome	K03062;K03062;K03062;K03062	GO:0005654//nucleoplasm;GO:0005829//cytosol;GO:0005838//proteasome regulatory particle;GO:0008540//proteasome regulatory particle, base subcomplex	GO:0005524//ATP binding;GO:0016887//ATPase activity;GO:0017025//TBP-class protein binding;GO:0036402//proteasome-activating ATPase activity	GO:0007623//circadian rhythm;GO:0008063//Toll signaling pathway;GO:0043161//proteasome-mediated ubiquitin-dependent protein catabolic process
Sfur011611	1.803	1.16	0.843	pol	Retrovirus-related Pol polyprotein from transposon 412	Human Diseases;Environmental Information Processing	Infectious diseases;Signal transduction	ko05169//Epstein-Barr virus infection;ko04330//Notch signaling pathway	K06065;K06065	-	GO:0003676//nucleic acid binding;GO:0003964//RNA-directed DNA polymerase activity;GO:0004190//aspartic-type endopeptidase activity;GO:0004519//endonuclease activity	GO:0015074//DNA integration
Sfur011734	19.573	11.807	9.143	trappc6b	Trafficking protein particle complex subunit 6b	-	-	-	-	GO:0005783//endoplasmic reticulum;GO:0005801//cis-Golgi network;GO:0005802//trans-Golgi network;GO:0030008//TRAPP complex	-	GO:0006888//ER to Golgi vesicle-mediated transport;GO:0007399//nervous system development;GO:0043087//regulation of GTPase activity
Sfur011744	2.723	1.313	0.907	IntS11	Integrator complex subunit 11	-	-	-	-	GO:0005634//nucleus;GO:0005737//cytoplasm;GO:0032039//integrator complex	GO:0016787//hydrolase activity	GO:0016180//snRNA processing;GO:0034472//snRNA 3'-end processing
Sfur011793	4.13	2.343	1.843	--	Putative uncharacterized protein	-	-	-	-	-	-	-
Sfur011797	89.267	58.4	42.177	psmc3-a	26S proteasome regulatory subunit 6A-A	Human Diseases;Genetic Information Processing	Infectious diseases;Folding, sorting and degradation	ko05169//Epstein-Barr virus infection;ko03050//Proteasome	K03065;K03065	GO:0005634//nucleus;GO:0005737//cytoplasm;GO:0022624//proteasome accessory complex	GO:0005524//ATP binding;GO:0016887//ATPase activity	GO:0030163//protein catabolic process
Sfur011810	0.287	0.04	0.013	--	Putative uncharacterized protein	-	-	-	-	-	-	-
Sfur011865	1.027	0.57	0.287	--	Putative uncharacterized protein	-	-	-	-	-	-	-
Sfur011884	4.41	2.447	1.777	RFC4	Replication factor C subunit 4	Genetic Information Processing;Genetic Information Processing;Genetic Information Processing	Replication and repair;Replication and repair;Replication and repair	ko03420//Nucleotide excision repair;ko03030//DNA replication;ko03430//Mismatch repair	K10755;K10755;K10755	GO:0005634//nucleus;GO:0005654//nucleoplasm;GO:0005663//DNA replication factor C complex;GO:0031390//Ctf18 RFC-like complex;GO:0031391//Elg1 RFC-like complex	GO:0003677//DNA binding;GO:0005524//ATP binding;GO:0016887//ATPase activity;GO:0019899//enzyme binding	GO:0006260//DNA replication;GO:0006261//DNA-dependent DNA replication;GO:0006271//DNA strand elongation involved in DNA replication;GO:0006281//DNA repair;GO:0006283//transcription-coupled nucleotide-excision repair;GO:0006296//nucleotide-excision repair, DNA incision, 5'-to lesion;GO:0006297//nucleotide-excision repair, DNA gap filling;GO:0019985//translesion synthesis;GO:0032201//telomere maint…
Sfur012104	3.47	1.707	1.177	PGBD2	Chimeric ERCC6-PGBD3 protein	-	-	-	-	GO:0005654//nucleoplasm;GO:0016604//nuclear body	GO:0043565//sequence-specific DNA binding	GO:0002230//positive regulation of defense response to virus by host;GO:0010628//positive regulation of gene expression;GO:0033141//positive regulation of peptidyl-serine phosphorylation of STAT protein;GO:0045739//positive regulation of DNA repair
Sfur012117	4.6	1.893	1.287	--	Putative uncharacterized protein	Metabolism;Metabolism;Organismal Systems;Organismal Systems	Global and overview maps;Metabolism of other amino acids;Endocrine system;Immune system	ko01100//Metabolic pathways;ko00480//Glutathione metabolism;ko04614//Renin-angiotensin system;ko04640//Hematopoietic cell lineage	K11140;K11140;K11140;K11140	-	-	-
Sfur012128	0.467	0.203	0.097	--	Putative uncharacterized protein	-	-	-	-	-	-	-
Sfur012132	1573.02	1077.56	761.37	Meltf	Transferrin	-	-	-	-	GO:0005615//extracellular space	GO:0046872//metal ion binding	GO:0006811//ion transport;GO:0055072//iron ion homeostasis
Sfur012337	11.737	8.023	5.45	--	Putative uncharacterized protein	-	-	-	-	-	-	-
Sfur012387	15.253	9.083	6.673	SmydA-8	SET domain-containing protein SmydA-8, isoform B	Metabolism;Metabolism	Global and overview maps;Amino acid metabolism	ko01100//Metabolic pathways;ko00310//Lysine degradation	K11426;K11426	GO:0000790//nuclear chromatin	GO:0008757//S-adenosylmethionine-dependent methyltransferase activity;GO:0042826//histone deacetylase binding	GO:0010629//negative regulation of gene expression;GO:0034968//histone lysine methylation
Sfur012388	4.6	2.903	1.89	--	Putative uncharacterized protein	-	-	-	-	-	-	-
Sfur012510	3.987	2.033	1.143	Mre11	Double-strand break repair protein MRE11	Cellular Processes;Genetic Information Processing;Genetic Information Processing	Cell growth and death;Replication and repair;Replication and repair	ko04218//Cellular senescence;ko03440//Homologous recombination;ko03450//Non-homologous end-joining	K10865;K10865;K10865	GO:0000784//nuclear chromosome, telomeric region;GO:0000790//nuclear chromatin;GO:0000794//condensed nuclear chromosome;GO:0005634//nucleus;GO:0005654//nucleoplasm;GO:0005657//replication fork;GO:0005737//cytoplasm;GO:0016605//PML body;GO:0030870//Mre11 complex;GO:0035861//site of double-strand break;GO:0048471//perinuclear region of cytoplasm	GO:0000014//single-stranded DNA endodeoxyribonuclease activity;GO:0004520//endodeoxyribonuclease activity;GO:0008022//protein C-terminus binding;GO:0008408//3'-5' exonuclease activity;GO:0008409//5'-3' exonuclease activity;GO:0030145//manganese ion binding;GO:0042802//identical protein binding	GO:0000723//telomere maintenance;GO:0000724//double-strand break repair via homologous recombination;GO:0006302//double-strand break repair;GO:0006303//double-strand break repair via nonhomologous end joining;GO:0006974//cellular response to DNA damage stimulus;GO:0007062//sister chromatid cohesion;GO:0007095//mitotic G2 DNA damage checkpoint;GO:0007129//synapsis;GO:0007507//heart development;GO:…
Sfur012775	3.863	2.753	1.553	--	Pogo transposable element with ZNF domain	-	-	-	-	GO:0000790//nuclear chromatin;GO:0005634//nucleus;GO:0005654//nucleoplasm;GO:0005737//cytoplasm;GO:0005829//cytosol	GO:0003677//DNA binding;GO:0046872//metal ion binding	GO:0007064//mitotic sister chromatid cohesion;GO:0010468//regulation of gene expression;GO:0045944//positive regulation of transcription from RNA polymerase II promoter;GO:0051301//cell division;GO:0051382//kinetochore assembly
Sfur012816	112.183	61.997	47.507	PSMD2	26S proteasome non-ATPase regulatory subunit 2	Human Diseases;Genetic Information Processing	Infectious diseases;Folding, sorting and degradation	ko05169//Epstein-Barr virus infection;ko03050//Proteasome	K03028;K03028	GO:0022624//proteasome accessory complex	GO:0030234//enzyme regulator activity	GO:0042176//regulation of protein catabolic process
Sfur012838	21.14	13.587	7.67	nsmce2	E3 SUMO-protein ligase NSE2	-	-	-	-	GO:0000781//chromosome, telomeric region;GO:0005634//nucleus;GO:0016605//PML body;GO:0030915//Smc5-Smc6 complex	GO:0004842//ubiquitin-protein transferase activity;GO:0008270//zinc ion binding;GO:0019789//SUMO transferase activity;GO:0061665//SUMO ligase activity	GO:0000722//telomere maintenance via recombination;GO:0000724//double-strand break repair via homologous recombination;GO:0007049//cell cycle;GO:0016925//protein sumoylation;GO:0034184//positive regulation of maintenance of mitotic sister chromatid cohesion;GO:0045842//positive regulation of mitotic metaphase/anaphase transition;GO:0051301//cell division;GO:0090398//cellular senescence
Sfur012867	2.907	1.263	0.647	SERP2	Stress-associated endoplasmic reticulum protein 2	Metabolism;Metabolism	Global and overview maps;Glycan biosynthesis and metabolism	ko01100//Metabolic pathways;ko00601//Glycosphingolipid biosynthesis - lacto and neolacto series	K07819;K07819	GO:0005789//endoplasmic reticulum membrane;GO:0016021//integral component of membrane	-	GO:0006486//protein glycosylation;GO:0015031//protein transport;GO:0030968//endoplasmic reticulum unfolded protein response
Sfur013085	11.613	6.65	5.363	--	Putative uncharacterized protein	Human Diseases	Infectious diseases	ko05164//Influenza A	K15042	-	-	-
Sfur013157	144.427	72.453	54.867	ZNF706	Zinc finger protein 706	-	-	-	-	GO:0005634//nucleus;GO:0005737//cytoplasm	GO:0046872//metal ion binding	GO:0006417//regulation of translation;GO:0045892//negative regulation of transcription, DNA-templated;GO:1902455//negative regulation of stem cell population maintenance
Sfur013177	7.613	3.56	2.53	ApepP	Xaa-Pro aminopeptidase ApepP	Organismal Systems	Development	ko04360//Axon guidance	K06841	GO:0005829//cytosol	GO:0046872//metal ion binding;GO:0070006//metalloaminopeptidase activity	GO:0006508//proteolysis
Sfur013245	155.237	91.093	68.863	PSMD14	26S proteasome non-ATPase regulatory subunit 14	Human Diseases;Genetic Information Processing	Infectious diseases;Folding, sorting and degradation	ko05169//Epstein-Barr virus infection;ko03050//Proteasome	K03030;K03030	GO:0000502//proteasome complex;GO:0005576//extracellular region;GO:0005634//nucleus;GO:0005654//nucleoplasm;GO:0005829//cytosol;GO:0008541//proteasome regulatory particle, lid subcomplex;GO:0022624//proteasome accessory complex;GO:0031597//cytosolic proteasome complex;GO:0034774//secretory granule lumen;GO:1904813//ficolin-1-rich granule lumen	GO:0004843//thiol-dependent ubiquitin-specific protease activity;GO:0008237//metallopeptidase activity;GO:0046872//metal ion binding;GO:0061133//endopeptidase activator activity;GO:0061578//Lys63-specific deubiquitinase activity;GO:0070122//isopeptidase activity;GO:0070628//proteasome binding	GO:0000165//MAPK cascade;GO:0000209//protein polyubiquitination;GO:0000724//double-strand break repair via homologous recombination;GO:0002223//stimulatory C-type lectin receptor signaling pathway;GO:0002479//antigen processing and presentation of exogenous peptide antigen via MHC class I, TAP-dependent;GO:0006303//double-strand break repair via nonhomologous end joining;GO:0006511//ubiquitin-dep…
Sfur013322	7.763	4.727	3.363	Myg1	MYG1 exonuclease	Genetic Information Processing;Genetic Information Processing;Genetic Information Processing	Replication and repair;Replication and repair;Replication and repair	ko03420//Nucleotide excision repair;ko03030//DNA replication;ko03430//Mismatch repair	K10754;K10754;K10754	GO:0005634//nucleus;GO:0005654//nucleoplasm;GO:0005730//nucleolus;GO:0005737//cytoplasm;GO:0005739//mitochondrion;GO:0005759//mitochondrial matrix	GO:0004518//nuclease activity	GO:0035641//locomotory exploration behavior
Sfur013514	62.37	43.44	31.087	ave	Protein aveugle	-	-	-	-	GO:0005737//cytoplasm;GO:0005829//cytosol;GO:0009898//cytoplasmic side of plasma membrane	GO:0097110//scaffold protein binding	GO:0001751//compound eye photoreceptor cell differentiation;GO:0001754//eye photoreceptor cell differentiation;GO:0007169//transmembrane receptor protein tyrosine kinase signaling pathway;GO:0007173//epidermal growth factor receptor signaling pathway;GO:0007601//visual perception;GO:0007623//circadian rhythm;GO:0042675//compound eye cone cell differentiation;GO:0046579//positive regulation of Ras…
Sfur013693	19.207	12.59	9.097	twk-7	TWiK family of potassium channels protein 18	-	-	-	-	GO:0005887//integral component of plasma membrane;GO:0016020//membrane	GO:0015271//outward rectifier potassium channel activity;GO:0022841//potassium ion leak channel activity	GO:0006813//potassium ion transport;GO:0006936//muscle contraction;GO:0030322//stabilization of membrane potential;GO:0040011//locomotion;GO:0071805//potassium ion transmembrane transport
Sfur013889	27.937	14.887	9.233	Chrac1	Chromatin accessibility complex protein 1	-	-	-	-	GO:0005634//nucleus;GO:0008623//CHRAC	GO:0003677//DNA binding;GO:0003887//DNA-directed DNA polymerase activity;GO:0046982//protein heterodimerization activity	-
Sfur013992	41.503	22.343	17.127	KLHL17	Kelch-like protein 17	-	-	-	-	GO:0005615//extracellular space;GO:0014069//postsynaptic density;GO:0015629//actin cytoskeleton;GO:0032839//dendrite cytoplasm;GO:0043025//neuronal cell body	GO:0031208//POZ domain binding;GO:0051015//actin filament binding;GO:0060090//binding, bridging	GO:0007420//brain development;GO:0016567//protein ubiquitination;GO:0030036//actin cytoskeleton organization
Sfur014203	35.52	22.867	16.057	MRPS31	28S ribosomal protein S31, mitochondrial	-	-	-	-	GO:0005743//mitochondrial inner membrane;GO:0005763//mitochondrial small ribosomal subunit	GO:0003735//structural constituent of ribosome	-
Sfur014441	4.497	1.237	0.423	--	Putative uncharacterized protein	-	-	-	-	-	-	-
Sfur014447	2.693	1.323	0.983	--	Putative uncharacterized protein	-	-	-	-	-	-	-
Sfur014457	4.46	2.27	1.503	--	Probable RNA-directed DNA polymerase from transposon BS	-	-	-	-	-	GO:0003964//RNA-directed DNA polymerase activity	GO:0006313//transposition, DNA-mediated
Sfur014540	507.333	215.883	139.827	GLB1	Beta-galactosidase	Metabolism;Cellular Processes;Metabolism;Metabolism;Metabolism;Metabolism;Metabolism	Global and overview maps;Transport and catabolism;Carbohydrate metabolism;Glycan biosynthesis and metabolism;Glycan biosynthesis and metabolism;Lipid metabolism;Glycan biosynthesis and metabolism	ko01100//Metabolic pathways;ko04142//Lysosome;ko00052//Galactose metabolism;ko00511//Other glycan degradation;ko00531//Glycosaminoglycan degradation;ko00600//Sphingolipid metabolism;ko00604//Glycosphingolipid biosynthesis - ganglio series	K12309;K12309;K12309;K12309;K12309;K12309;K12309	GO:0005764//lysosome;GO:0005773//vacuole	GO:0004565//beta-galactosidase activity	GO:0005975//carbohydrate metabolic process
Sfur014564	7.397	3.503	2.517	MPI	Mannose-6-phosphate isomerase	Metabolism;Metabolism;Metabolism	Global and overview maps;Carbohydrate metabolism;Carbohydrate metabolism	ko01100//Metabolic pathways;ko00520//Amino sugar and nucleotide sugar metabolism;ko00051//Fructose and mannose metabolism	K01809;K01809;K01809	GO:0005829//cytosol	GO:0004476//mannose-6-phosphate isomerase activity;GO:0008270//zinc ion binding	GO:0006486//protein glycosylation;GO:0009298//GDP-mannose biosynthetic process;GO:0061611//mannose to fructose-6-phosphate metabolic process
Sfur014586	2.733	1.677	1.353	AlaRS-m	Alanine--tRNA ligase, mitochondrial	Genetic Information Processing	Translation	ko00970//Aminoacyl-tRNA biosynthesis	K01872	GO:0005739//mitochondrion	GO:0000049//tRNA binding;GO:0002161//aminoacyl-tRNA editing activity;GO:0004813//alanine-tRNA ligase activity;GO:0005524//ATP binding;GO:0008270//zinc ion binding;GO:0016597//amino acid binding	GO:0006400//tRNA modification;GO:0006419//alanyl-tRNA aminoacylation
Sfur014639	2.513	1.257	0.877	Arp8	Actin-related protein 8	-	-	-	-	GO:0031011//Ino80 complex	GO:0005524//ATP binding	GO:0006281//DNA repair;GO:0006310//DNA recombination;GO:0006338//chromatin remodeling;GO:0006355//regulation of transcription, DNA-templated
Sfur014674	15.707	8.153	6.14	PSMG2	Proteasome assembly chaperone 2	-	-	-	-	GO:0005634//nucleus;GO:0005829//cytosol	GO:0060090//binding, bridging	GO:0007094//mitotic spindle assembly checkpoint;GO:0043066//negative regulation of apoptotic process;GO:0043248//proteasome assembly;GO:0051131//chaperone-mediated protein complex assembly
Sfur014680	45.837	23.947	18.373	--	Putative uncharacterized protein	-	-	-	-	-	-	-
Sfur014685	32.62	18.75	13.82	POLR2G	DNA-directed RNA polymerase II subunit RPB7	Human Diseases;Genetic Information Processing	Neurodegenerative diseases;Transcription	ko05016//Huntington disease;ko03020//RNA polymerase	K03015;K03015	GO:0000932//cytoplasmic mRNA processing body;GO:0005634//nucleus;GO:0005665//DNA-directed RNA polymerase II, core complex	GO:0003697//single-stranded DNA binding;GO:0003727//single-stranded RNA binding;GO:0003899//DNA-directed RNA polymerase activity;GO:0031369//translation initiation factor binding	GO:0000291//nuclear-transcribed mRNA catabolic process, exonucleolytic;GO:0006366//transcription from RNA polymerase II promoter;GO:0006367//transcription initiation from RNA polymerase II promoter;GO:0045948//positive regulation of translational initiation;GO:0060213//positive regulation of nuclear-transcribed mRNA poly(A) tail shortening
Sfur014800	4.113	0.193	0.04	ACP21	Cuticle protein 8	Metabolism	Lipid metabolism	ko00071//Fatty acid degradation	K13238	-	GO:0042302//structural constituent of cuticle	-
Sfur014822	1.873	1.09	0.673	cmas	N-acylneuraminate cytidylyltransferase A	Metabolism;Metabolism	Global and overview maps;Carbohydrate metabolism	ko01100//Metabolic pathways;ko00520//Amino sugar and nucleotide sugar metabolism	K21749;K21749	GO:0005634//nucleus	GO:0008781//N-acylneuraminate cytidylyltransferase activity	GO:0006054//N-acetylneuraminate metabolic process
Sfur014888	27.463	16.81	12.86	ACP1	Low molecular weight phosphotyrosine protein phosphatase	Metabolism;Cellular Processes;Metabolism;Metabolism	Global and overview maps;Cellular community - eukaryotes;Metabolism of cofactors and vitamins;Metabolism of cofactors and vitamins	ko01100//Metabolic pathways;ko04520//Adherens junction;ko00730//Thiamine metabolism;ko00740//Riboflavin metabolism	K14394;K14394;K14394;K14394	GO:0005737//cytoplasm	GO:0003993//acid phosphatase activity;GO:0004725//protein tyrosine phosphatase activity;GO:0004726//non-membrane spanning protein tyrosine phosphatase activity	-
Sfur014892	5.06	3.62	2.22	--	Putative uncharacterized protein	-	-	-	-	-	-	-
Sfur015065	4.593	2.83	2.133	--	Putative uncharacterized protein	-	-	-	-	-	-	-
Sfur015071	3.037	1.803	0.607	--	Transposable element P transposase	-	-	-	-	-	GO:0003693//P-element binding;GO:0004803//transposase activity;GO:0016740//transferase activity;GO:0046872//metal ion binding	GO:0006313//transposition, DNA-mediated;GO:0015074//DNA integration
Sfur015113	60.8	36.13	26.01	EMC6	ER membrane protein complex subunit 6	-	-	-	-	GO:0016021//integral component of membrane;GO:0030176//integral component of endoplasmic reticulum membrane;GO:0072546//ER membrane protein complex;GO:0097631//integral component of omegasome membrane	-	GO:0000045//autophagosome assembly
Sfur015134	43.49	23.787	18.543	UBL5	Ubiquitin-like protein 5	Organismal Systems	Aging	ko04212//Longevity regulating pathway - worm	K13113	GO:0005634//nucleus;GO:0005737//cytoplasm	GO:0031386//protein tag	GO:0000398//mRNA splicing, via spliceosome;GO:0006464//cellular protein modification process
Sfur015156	5.16	3.513	2.41	--	TELO2-interacting protein 2	-	-	-	-	GO:0005654//nucleoplasm;GO:0005813//centrosome;GO:0005829//cytosol;GO:0070209//ASTRA complex	-	-
Sfur015167	13.42	5.937	4.007	SLC35B1	Solute carrier family 35 member B1	-	-	-	-	GO:0030173//integral component of Golgi membrane;GO:0030176//integral component of endoplasmic reticulum membrane	GO:0005459//UDP-galactose transmembrane transporter activity;GO:0005460//UDP-glucose transmembrane transporter activity;GO:0022857//transmembrane transporter activity	GO:0008643//carbohydrate transport;GO:0072334//UDP-galactose transmembrane transport
Sfur015212	4.1	2.113	1.413	C3G	Guanine nucleotide-releasing factor 2	Environmental Information Processing;Cellular Processes;Organismal Systems;Organismal Systems;Human Diseases	Signal transduction;Cellular community - eukaryotes;Endocrine system;Nervous system;Cancers	ko04015//Rap1 signaling pathway;ko04510//Focal adhesion;ko04910//Insulin signaling pathway;ko04722//Neurotrophin signaling pathway;ko05211//Renal cell carcinoma	K06277;K06277;K06277;K06277;K06277	-	GO:0005088//Ras guanyl-nucleotide exchange factor activity;GO:0017034//Rap guanyl-nucleotide exchange factor activity;GO:0017124//SH3 domain binding	GO:0007265//Ras protein signal transduction;GO:0007525//somatic muscle development;GO:0016203//muscle attachment;GO:0043087//regulation of GTPase activity;GO:0043547//positive regulation of GTPase activity;GO:0045214//sarcomere organization;GO:0045880//positive regulation of smoothened signaling pathway
Sfur015226	98.923	48.43	37.103	CPIJ001717	Glutamyl-tRNA(Gln) amidotransferase subunit B, mitochondrial	Metabolism;Genetic Information Processing	Global and overview maps;Translation	ko01100//Metabolic pathways;ko00970//Aminoacyl-tRNA biosynthesis	K02434;K02434	GO:0005739//mitochondrion;GO:0030956//glutamyl-tRNA(Gln) amidotransferase complex	GO:0005524//ATP binding;GO:0050567//glutaminyl-tRNA synthase (glutamine-hydrolyzing) activity	GO:0032543//mitochondrial translation;GO:0070681//glutaminyl-tRNAGln biosynthesis via transamidation
Sfur015340	17.07	9.133	7.227	POLR3K	DNA-directed RNA polymerase III subunit RPC10	Genetic Information Processing;Organismal Systems	Transcription;Immune system	ko03020//RNA polymerase;ko04623//Cytosolic DNA-sensing pathway	K03019;K03019	GO:0005654//nucleoplasm;GO:0005666//DNA-directed RNA polymerase III complex;GO:0005730//nucleolus;GO:0005829//cytosol	GO:0003676//nucleic acid binding;GO:0003899//DNA-directed RNA polymerase activity;GO:0008270//zinc ion binding	GO:0006383//transcription from RNA polymerase III promoter;GO:0006386//termination of RNA polymerase III transcription;GO:0032481//positive regulation of type I interferon production;GO:0042779//tRNA 3'-trailer cleavage;GO:0045087//innate immune response;GO:0051607//defense response to virus
Sfur015371	4.263	2.403	1.583	ndufaf7	Protein arginine methyltransferase NDUFAF7, mitochondrial	Organismal Systems	Environmental adaptation	ko04714//Thermogenesis	K18164	GO:0005739//mitochondrion	GO:0035243//protein-arginine omega-N symmetric methyltransferase activity	GO:0019918//peptidyl-arginine methylation, to symmetrical-dimethyl arginine;GO:0032981//mitochondrial respiratory chain complex I assembly
Sfur015384	3.803	2.48	1.777	CCNK	Cyclin-K	-	-	-	-	GO:0002944//cyclin K-CDK12 complex;GO:0002945//cyclin K-CDK13 complex;GO:0005634//nucleus;GO:0005654//nucleoplasm;GO:0008024//positive transcription elongation factor complex b	GO:0004693//cyclin-dependent protein serine/threonine kinase activity;GO:0008353//RNA polymerase II carboxy-terminal domain kinase activity;GO:0016538//cyclin-dependent protein serine/threonine kinase regulator activity;GO:0019901//protein kinase binding;GO:0061575//cyclin-dependent protein serine/threonine kinase activator activity	GO:0000079//regulation of cyclin-dependent protein serine/threonine kinase activity;GO:0006357//regulation of transcription from RNA polymerase II promoter;GO:0006366//transcription from RNA polymerase II promoter;GO:0006368//transcription elongation from RNA polymerase II promoter;GO:0006974//cellular response to DNA damage stimulus;GO:0007049//cell cycle;GO:0032786//positive regulation of DNA-t…
Sfur015390	1.193	0.647	0.483	--	Ankyrin repeat domain-containing protein 30B	-	-	-	-	-	-	-
profile 1
id	PE	DE	AE	Symbol	Description	KEGG_A_class	KEGG_B_class	Pathway	K_ID	GO Component	GO Function	GO Process
MSTRG.10094	4.65	2.36	2.013	--	-	-	-	-	-	-	-	-
MSTRG.10374	3.537	1.37	1.687	--	zinc finger protein 2 homolog [Nilaparvata lugens]	-	-	-	-	-	-	-
MSTRG.10603	29.133	4.68	5.01	--	CKLF-like MARVEL transmembrane domain-containing protein 8 [Nilaparvata lugens]	-	-	-	-	-	-	-
MSTRG.10770	95.78	7.34	3.377	Edg84A	cuticle protein 19-like, partial [Nilaparvata lugens]	-	-	-	-	-	GO:0005214//structural constituent of chitin-based cuticle	GO:0042335//cuticle development
MSTRG.10791	1.837	0.057	0.14	--	microtubule-associated protein futsch-like isoform X2 [Odontomachus brunneus]	-	-	-	-	-	-	-
MSTRG.10792	2.79	0.023	0.127	--	hypothetical protein LSTR_LSTR006021 [Laodelphax striatellus]	-	-	-	-	-	-	-
MSTRG.10902	3.14	0.957	1.03	iHog	interference hedgehog-like [Nilaparvata lugens]	Environmental Information Processing	Signal transduction	ko04341//Hedgehog signaling pathway - fly	K20245	-	-	GO:0001654//eye development;GO:0003002//regionalization;GO:0007166//cell surface receptor signaling pathway;GO:0007444//imaginal disc development;GO:0009887//organ morphogenesis
MSTRG.10909	14.18	6.037	4.98	--	hypothetical protein LSTR_LSTR006052 [Laodelphax striatellus]	-	-	-	-	-	-	-
MSTRG.10939	15.197	2.74	2.427	--	Phosphonates-binding periplasmic protein [Papilio xuthus]	-	-	-	-	-	-	-
MSTRG.11202	51.71	4.707	2.517	--	hypothetical protein LSTR_LSTR012958 [Laodelphax striatellus]	-	-	-	-	-	-	-
MSTRG.11348	59.08	0.813	1.083	--	hypothetical protein LSTR_LSTR003103 [Laodelphax striatellus]	-	-	-	-	-	-	-
MSTRG.11359	5.913	0.15	0.143	--	hypothetical protein LSTR_LSTR003103 [Laodelphax striatellus]	-	-	-	-	-	-	-
MSTRG.11365	4.67	0.083	0.17	--	hypothetical protein LSTR_LSTR003104 [Laodelphax striatellus]	-	-	-	-	-	-	-
MSTRG.11376	36.477	19.443	16.523	Pdss2	LOW QUALITY PROTEIN: decaprenyl-diphosphate synthase subunit 2 [Nilaparvata lugens]	Metabolism	Metabolism of terpenoids and polyketides	ko00900//Terpenoid backbone biosynthesis	K12505	-	-	-
MSTRG.11501	11.983	5.143	5.587	Insr	insulin-like growth factor 1 receptor [Nilaparvata lugens]	-	-	-	-	-	-	-
MSTRG.11683	4.397	2.107	2.127	--	-	-	-	-	-	-	-	-
MSTRG.11711	4.527	1.737	1.89	SYMPK	symplekin [Cryptotermes secundus]	Cellular Processes;Genetic Information Processing	Cellular community - eukaryotes;Translation	ko04530//Tight junction;ko03015//mRNA surveillance pathway	K06100;K06100	-	-	-
MSTRG.11734	2.807	0.563	0.58	fend	mucin-5AC-like [Frankliniella occidentalis]	-	-	-	-	-	-	-
MSTRG.1174	6.34	2.42	2.32	gkap1-a	G kinase-anchoring protein 1-like [Nilaparvata lugens]	-	-	-	-	-	-	-
MSTRG.11919	121.837	17.073	17.62	ACP20	cuticle protein 19 [Nilaparvata lugens]	-	-	-	-	-	-	-
MSTRG.11920	9.71	1.943	1.54	ACP20	cuticle protein 19 [Nilaparvata lugens]	-	-	-	-	-	-	-
MSTRG.12042	85.74	8.85	9.86	ACP21	cuticle protein 7-like [Nilaparvata lugens]	-	-	-	-	-	-	-
MSTRG.12043	8.087	0.973	1.357	ACP21	cuticle protein 7-like [Nilaparvata lugens]	-	-	-	-	-	-	-
MSTRG.12168	2.55	1.103	1.497	--	DNA ligase 1-like [Nilaparvata lugens]	-	-	-	-	-	-	-
MSTRG.12403	820.387	0.967	0.637	--	odorant-binding protein 3 [Sogatella furcifera]	-	-	-	-	-	-	-
MSTRG.12404	25.303	0.057	0.05	--	odorant-binding protein 3 [Sogatella furcifera]	-	-	-	-	-	-	-
MSTRG.12472	5.86	0.36	0.373	--	pollen-specific leucine-rich repeat extensin-like protein 1 [Rhopalosiphum maidis]	-	-	-	-	-	-	-
MSTRG.12496	269.94	17.183	11.25	--	fibroin heavy chain-like isoform X1 [Leptinotarsa decemlineata]	-	-	-	-	-	-	-
MSTRG.12849	3.927	0.223	0.29	OtopLc	otopetrin-2-like [Nilaparvata lugens]	-	-	-	-	-	-	-
MSTRG.12929	2.067	0.32	0.59	--	tetraspanin-11-like [Nilaparvata lugens]	-	-	-	-	-	-	-
MSTRG.1295	39.497	1.243	1.72	--	caskin-1 isoform X4 [Nilaparvata lugens]	-	-	-	-	-	-	-
MSTRG.13082	49.203	24.38	20.643	UPRT	uracil phosphoribosyltransferase homolog [Nilaparvata lugens]	Metabolism;Metabolism	Global and overview maps;Nucleotide metabolism	ko01100//Metabolic pathways;ko00240//Pyrimidine metabolism	K00761;K00761	-	-	-
MSTRG.13171	11.34	5.153	5.53	GGCT	gamma-glutamylcyclotransferase-like [Nilaparvata lugens]	Metabolism;Metabolism	Global and overview maps;Metabolism of other amino acids	ko01100//Metabolic pathways;ko00480//Glutathione metabolism	K00682;K00682	-	-	-
MSTRG.13331	66.677	33.907	26.923	Psma1	proteasome subunit alpha type-1 [Nilaparvata lugens]	Genetic Information Processing	Folding, sorting and degradation	ko03050//Proteasome	K02725	-	-	-
MSTRG.13338	2.757	0.82	0.927	Tyms	thymidylate synthase [Nilaparvata lugens]	Metabolism;Human Diseases;Metabolism;Metabolism	Global and overview maps;Drug resistance;Nucleotide metabolism;Metabolism of cofactors and vitamins	ko01100//Metabolic pathways;ko01523//Antifolate resistance;ko00240//Pyrimidine metabolism;ko00670//One carbon pool by folate	K00560;K00560;K00560;K00560	-	-	-
MSTRG.1341	11.75	4.89	5.163	--	cyclic AMP-dependent transcription factor ATF-6 alpha isoform X2 [Nilaparvata lugens]	Human Diseases;Genetic Information Processing	Neurodegenerative diseases;Folding, sorting and degradation	ko05010//Alzheimer disease;ko04141//Protein processing in endoplasmic reticulum	K09054;K09054	-	-	-
MSTRG.13417	5.267	0.77	0.51	Rdh13	retinol dehydrogenase 11 [Nilaparvata lugens]	-	-	-	-	-	-	-
MSTRG.1449	1.183	0.357	0.447	--	uncharacterized SDCCAG3 family protein-like [Nilaparvata lugens]	-	-	-	-	-	-	-
MSTRG.14565	13.247	2.36	1.78	--	circadian clock-controlled protein-like, partial [Nilaparvata lugens]	-	-	-	-	-	-	GO:0000003//reproduction
MSTRG.14617	25.023	8.303	7.79	RANBP1	ran-specific GTPase-activating protein-like [Nilaparvata lugens]	-	-	-	-	GO:0005815//microtubule organizing center;GO:0012505//endomembrane system;GO:0043231//intracellular membrane-bounded organelle;GO:0044444//cytoplasmic part	GO:0008047//enzyme activator activity;GO:0017016//Ras GTPase binding;GO:0030695//GTPase regulator activity	GO:0000226//microtubule cytoskeleton organization;GO:0006810//transport;GO:0010038//response to metal ion;GO:0010975//regulation of neuron projection development;GO:0042493//response to drug;GO:0043087//regulation of GTPase activity;GO:0044403//symbiosis, encompassing mutualism through parasitism;GO:0045840//positive regulation of mitotic nuclear division;GO:0071398//cellular response to fatty ac…
MSTRG.14666	11.787	3.753	3.193	Stt3a	dolichyl-diphosphooligosaccharide--protein glycosyltransferase subunit STT3A-like [Nilaparvata lugens]	Metabolism;Genetic Information Processing;Metabolism;Metabolism	Global and overview maps;Folding, sorting and degradation;Glycan biosynthesis and metabolism;Glycan biosynthesis and metabolism	ko01100//Metabolic pathways;ko04141//Protein processing in endoplasmic reticulum;ko00513//Various types of N-glycan biosynthesis;ko00510//N-Glycan biosynthesis	K07151;K07151;K07151;K07151	GO:0031090//organelle membrane;GO:0031224//intrinsic component of membrane;GO:0043231//intracellular membrane-bounded organelle	GO:0004576//oligosaccharyl transferase activity;GO:0005488//binding	GO:0006487//protein N-linked glycosylation
MSTRG.14795	409.393	76.02	63.113	--	paternally-expressed gene 3 protein-like [Nilaparvata lugens]	-	-	-	-	-	-	-
MSTRG.14965	21	11.77	10.287	tarbp2	RISC-loading complex subunit tarbp2-like isoform X2 [Nilaparvata lugens]	-	-	-	-	GO:0031332//RNAi effector complex	GO:0005488//binding	GO:0007549//dosage compensation;GO:0019827//stem cell population maintenance;GO:0034470//ncRNA processing;GO:0048477//oogenesis;GO:0048731//system development;GO:0070918//production of small RNA involved in gene silencing by RNA
MSTRG.1499	1.687	0.59	0.853	--	BRCA1-associated RING domain protein 1-like [Nilaparvata lugens]	Genetic Information Processing	Replication and repair	ko03440//Homologous recombination	K10683	GO:0031981//nuclear lumen;GO:0043234//protein complex	GO:0046872//metal ion binding;GO:0046983//protein dimerization activity	GO:0042981//regulation of apoptotic process;GO:0044237//cellular metabolic process;GO:0048519//negative regulation of biological process
MSTRG.15131	2.77	0.347	0.52	BAMBI	BMP and activin membrane-bound inhibitor homolog [Cimex lectularius]	Environmental Information Processing;Environmental Information Processing	Signal transduction;Signal transduction	ko04310//Wnt signaling pathway;ko04350//TGF-beta signaling pathway	K10162;K10162	GO:0016020//membrane;GO:0044464//cell part	GO:0005102//receptor binding	GO:0006355//regulation of transcription, DNA-templated;GO:0007179//transforming growth factor beta receptor signaling pathway;GO:0007275//multicellular organism development;GO:0022604//regulation of cell morphogenesis;GO:0048522//positive regulation of cellular process;GO:0051179//localization;GO:0090092//regulation of transmembrane receptor protein serine/threonine kinase signaling pathway
MSTRG.1537	3.887	1.607	1.837	SYMPK	symplekin [Nilaparvata lugens]	Cellular Processes;Genetic Information Processing	Cellular community - eukaryotes;Translation	ko04530//Tight junction;ko03015//mRNA surveillance pathway	K06100;K06100	GO:0016020//membrane;GO:0031981//nuclear lumen	GO:0005488//binding	GO:0031124//mRNA 3'-end processing;GO:0031401//positive regulation of protein modification process
MSTRG.15402	22.66	7.037	8.723	--	mucin-7-like [Nilaparvata lugens]	-	-	-	-	-	-	-
MSTRG.15458	1.46	0.457	0.75	--	calmodulin-binding transcription activator 2 isoform X8 [Cryptotermes secundus]	-	-	-	-	-	-	-
MSTRG.15727	13.373	4.787	5.307	ACAA2	3-ketoacyl-CoA thiolase, mitochondrial [Nilaparvata lugens]	Metabolism;Metabolism;Metabolism;Metabolism;Metabolism	Global and overview maps;Global and overview maps;Lipid metabolism;Amino acid metabolism;Lipid metabolism	ko01100//Metabolic pathways;ko01212//Fatty acid metabolism;ko00071//Fatty acid degradation;ko00280//Valine, leucine and isoleucine degradation;ko00062//Fatty acid elongation	K07508;K07508;K07508;K07508;K07508	GO:0019866//organelle inner membrane;GO:0030684//preribosome;GO:0031981//nuclear lumen;GO:0031988//membrane-bounded vesicle;GO:0043232//intracellular non-membrane-bounded organelle;GO:0043234//protein complex;GO:0044429//mitochondrial part	GO:0003723//RNA binding;GO:0016407//acetyltransferase activity;GO:0016408//C-acyltransferase activity	GO:0000460//maturation of 5.8S rRNA;GO:0001666//response to hypoxia;GO:0006637//acyl-CoA metabolic process;GO:0009062//fatty acid catabolic process;GO:0010823//negative regulation of mitochondrion organization;GO:0035795//negative regulation of mitochondrial membrane permeability
MSTRG.15823	0.733	0.03	0.073	--	AGAP002975-PA-like protein [Anopheles sinensis]	-	-	-	-	-	-	-
MSTRG.16085	112.95	47.263	37.3	Mapre3	microtubule-associated protein RP/EB family member 3 isoform X2 [Nilaparvata lugens]	-	-	-	-	GO:0005819//spindle;GO:0005874//microtubule	GO:0015631//tubulin binding	GO:0006461//protein complex assembly;GO:0008344//adult locomotory behavior;GO:0009611//response to wounding;GO:0030588//pseudocleavage;GO:0035006//melanization defense response;GO:0050954//sensory perception of mechanical stimulus;GO:0051231//spindle elongation;GO:0051293//establishment of spindle localization
MSTRG.16106	2.243	1.087	1.12	MYB3R4	snRNA-activating protein complex subunit 4 [Zootermopsis nevadensis]	-	-	-	-	-	GO:0003677//DNA binding	GO:0006351//transcription, DNA-templated;GO:0044767//single-organism developmental process
MSTRG.16989	3.867	1.883	1.66	--	zinc finger SWIM domain-containing protein 1-like [Nilaparvata lugens]	-	-	-	-	-	-	-
MSTRG.17552	69.99	30.413	33.593	C5	CD109 antigen [Nilaparvata lugens]	-	-	-	-	GO:0031224//intrinsic component of membrane;GO:0044421//extracellular region part;GO:0044459//plasma membrane part;GO:0070160//occluding junction	GO:0005488//binding	GO:0001700//embryonic development via the syncytial blastoderm;GO:0006909//phagocytosis;GO:0007043//cell-cell junction assembly;GO:0009620//response to fungus;GO:0010466//negative regulation of peptidase activity;GO:0016331//morphogenesis of embryonic epithelium;GO:0042742//defense response to bacterium;GO:0045168//cell-cell signaling involved in cell fate commitment;GO:0065008//regulation of bio…
MSTRG.17614	1.633	0.767	0.863	--	putative tick transposon [Operophtera brumata]	-	-	-	-	-	-	-
MSTRG.17894	1.707	0.163	0.177	--	hypothetical protein LSTR_LSTR013002 [Laodelphax striatellus]	-	-	-	-	-	-	-
MSTRG.17895	5.537	1.963	2.753	CG8152	G patch domain and ankyrin repeat-containing protein 1 homolog [Nilaparvata lugens]	-	-	-	-	-	GO:0005488//binding	-
MSTRG.1836	4.09	1.887	2.597	--	-	-	-	-	-	-	-	-
MSTRG.18791	19.81	3.603	4.527	--	hypothetical protein LSTR_LSTR000785 [Laodelphax striatellus]	-	-	-	-	-	-	-
MSTRG.18965	2.44	0.85	0.977	--	reverse transcriptase, partial [Aedes aegypti]	-	-	-	-	-	-	-
MSTRG.1901	2.087	0.947	0.96	CCDC77	coiled-coil domain-containing protein 77-like isoform X1 [Nilaparvata lugens]	-	-	-	-	-	-	-
MSTRG.19105	18.417	8.89	9.173	SORBS2	Sorbin and SH3 domain-containing protein 1 [Trachymyrmex septentrionalis]	-	-	-	-	-	-	-
MSTRG.19129	27.827	10.597	8.557	Gld	glucose dehydrogenase [FAD, quinone]-like [Nilaparvata lugens]	-	-	-	-	-	GO:0016491//oxidoreductase activity	-
MSTRG.19620	1.53	0.807	0.64	HEMK1	hemK methyltransferase family member 1 [Nilaparvata lugens]	-	-	-	-	GO:0043231//intracellular membrane-bounded organelle	GO:0005488//binding;GO:0008169//C-methyltransferase activity;GO:0008170//N-methyltransferase activity;GO:0008171//O-methyltransferase activity;GO:0008276//protein methyltransferase activity;GO:0008649//rRNA methyltransferase activity;GO:0016427//tRNA (cytosine) methyltransferase activity	GO:0008152//metabolic process
MSTRG.19931	17.453	5.21	6.537	--	AAEL000683-PA [Aedes aegypti]	-	-	-	-	-	-	-
MSTRG.2005	8.887	4.003	4.193	UGGT1	UDP-glucose:glycoprotein glucosyltransferase-like, partial [Nilaparvata lugens]	Genetic Information Processing	Folding, sorting and degradation	ko04141//Protein processing in endoplasmic reticulum	K11718	GO:0043231//intracellular membrane-bounded organelle;GO:0044444//cytoplasmic part	GO:0005488//binding	GO:0006464//cellular protein modification process;GO:0044710//single-organism metabolic process;GO:0044763//single-organism cellular process;GO:1901135//carbohydrate derivative metabolic process
MSTRG.20053	41.94	11.957	11.283	--	cell wall protein IFF6 isoform X3 [Nilaparvata lugens]	-	-	-	-	-	-	-
MSTRG.20056	28.197	0.977	0.967	--	keratin, type I cytoskeletal 9-like isoform X3 [Nilaparvata lugens]	-	-	-	-	-	-	-
MSTRG.20057	3.297	0.097	0.24	--	keratin, type I cytoskeletal 9-like [Nilaparvata lugens]	-	-	-	-	-	-	-
MSTRG.2009	7.03	3.03	2.25	Uggt	UDP-glucose:glycoprotein glucosyltransferase-like, partial [Nilaparvata lugens]	Genetic Information Processing	Folding, sorting and degradation	ko04141//Protein processing in endoplasmic reticulum	K11718	-	GO:0016740//transferase activity	GO:0044237//cellular metabolic process;GO:0044238//primary metabolic process;GO:0044710//single-organism metabolic process;GO:0044763//single-organism cellular process;GO:1901135//carbohydrate derivative metabolic process
MSTRG.20639	7.483	2.08	2.097	--	myosin heavy chain-like isoform X1 [Nilaparvata lugens]	-	-	-	-	-	-	-
MSTRG.21035	6.04	2.75	2.38	--	hypothetical protein B7P43_G14705 [Cryptotermes secundus]	-	-	-	-	-	-	-
MSTRG.21282	4.477	0.66	1.1	--	-	-	-	-	-	-	-	-
MSTRG.21520	36.773	2.537	1.793	ACP20	cuticular protein [Nilaparvata lugens]	-	-	-	-	-	GO:0005214//structural constituent of chitin-based cuticle	GO:0042335//cuticle development
MSTRG.21722	49.747	4.613	4.923	ck	myosin-VIIa isoform X1 [Nilaparvata lugens]	-	-	-	-	GO:0005774//vacuolar membrane;GO:0005886//plasma membrane;GO:0005902//microvillus;GO:0016461//unconventional myosin complex;GO:0031513//nonmotile primary cilium;GO:0035324//female germline ring canal;GO:0044448//cell cortex part;GO:0044462//external encapsulating structure part;GO:0048770//pigment granule;GO:0097458//neuron part;GO:1990427//stereocilia tip-link density	GO:0003774//motor activity;GO:0003779//actin binding;GO:0017022//myosin binding;GO:0032550//purine ribonucleoside binding;GO:0042623//ATPase activity, coupled;GO:0046983//protein dimerization activity;GO:0050839//cell adhesion molecule binding	GO:0006897//endocytosis;GO:0006928//movement of cell or subcellular component;GO:0007040//lysosome organization;GO:0009886//post-embryonic morphogenesis;GO:0009887//organ morphogenesis;GO:0015031//protein transport;GO:0030036//actin cytoskeleton organization;GO:0032528//microvillus organization;GO:0033059//cellular pigmentation;GO:0035017//cuticle pattern formation;GO:0035114//imaginal disc-deriv…
MSTRG.2174	14.857	5.383	4.103	--	tetraspanin-18-like [Nilaparvata lugens]	-	-	-	-	GO:0016020//membrane	-	-
MSTRG.22381	3.923	1.77	1.36	--	hypothetical protein GE061_20699 [Apolygus lucorum]	-	-	-	-	-	-	-
MSTRG.22416	7.85	3.333	3.713	DCPS	m7GpppX diphosphatase-like isoform X1 [Nilaparvata lugens]	Genetic Information Processing	Folding, sorting and degradation	ko03018//RNA degradation	K12584	GO:0031981//nuclear lumen;GO:0044444//cytoplasmic part	GO:0000339//RNA cap binding;GO:0016462//pyrophosphatase activity	GO:0000291//nuclear-transcribed mRNA catabolic process, exonucleolytic;GO:0000398//mRNA splicing, via spliceosome;GO:0043067//regulation of programmed cell death;GO:0045168//cell-cell signaling involved in cell fate commitment;GO:0071310//cellular response to organic substance
MSTRG.22658	3.14	1.3	1.447	--	-	-	-	-	-	-	-	-
MSTRG.2266	13.63	6.473	7.55	--	pregnancy zone protein-like [Nilaparvata lugens]	-	-	-	-	GO:0031224//intrinsic component of membrane;GO:0044421//extracellular region part;GO:0044459//plasma membrane part;GO:0070160//occluding junction	GO:0005488//binding	GO:0001700//embryonic development via the syncytial blastoderm;GO:0006909//phagocytosis;GO:0007043//cell-cell junction assembly;GO:0009620//response to fungus;GO:0010466//negative regulation of peptidase activity;GO:0016331//morphogenesis of embryonic epithelium;GO:0042742//defense response to bacterium;GO:0045168//cell-cell signaling involved in cell fate commitment;GO:0065008//regulation of bio…
MSTRG.22713	1.353	0.397	0.333	SAR2567	farnesol dehydrogenase-like [Nilaparvata lugens]	Metabolism;Metabolism	Metabolism of terpenoids and polyketides;Metabolism of terpenoids and polyketides	ko00981//Insect hormone biosynthesis;ko00900//Terpenoid backbone biosynthesis	K15890;K15890	-	GO:0016616//oxidoreductase activity, acting on the CH-OH group of donors, NAD or NADP as acceptor	GO:0006716//juvenile hormone metabolic process;GO:0030154//cell differentiation
MSTRG.22970	6.527	1.993	1.733	SLC36A2	proton-coupled amino acid transporter-like protein pathetic [Nilaparvata lugens]	Organismal Systems	Digestive system	ko04974//Protein digestion and absorption	K14209	-	-	-
MSTRG.23174	14.293	0.31	0.55	--	AAEL014873-PA [Aedes aegypti]	-	-	-	-	-	-	-
MSTRG.23182	11.457	0.157	0.373	--	hypothetical protein LSTR_LSTR011681 [Laodelphax striatellus]	-	-	-	-	-	-	-
MSTRG.23564	1.167	0.56	0.547	--	-	-	-	-	-	-	-	-
MSTRG.23723	1.52	0.65	0.78	lva	golgin subfamily B member 1-like [Nilaparvata lugens]	-	-	-	-	GO:0005794//Golgi apparatus;GO:0044446//intracellular organelle part	GO:0008092//cytoskeletal protein binding	GO:0048468//cell development;GO:0048858//cell projection morphogenesis
MSTRG.23725	2.48	1.243	1.213	--	golgin subfamily B member 1-like [Nilaparvata lugens]	-	-	-	-	-	-	-
MSTRG.23832	1.69	0.703	1.063	ADCY9	LOW QUALITY PROTEIN: adenylate cyclase type 9-like [Nilaparvata lugens]	Metabolism;Organismal Systems;Human Diseases;Environmental Information Processing;Environmental Information Processing;Environmental Information Processing;Human Diseases;Environmental Information Processing;Metabolism;Organismal Systems;Environmental Information Processing;Human Diseases;Organismal Systems;Human Diseases;Organismal Systems;Human Diseases;Organismal Systems;Organismal Systems;Org…	Global and overview maps;Environmental adaptation;Cancers;Signal transduction;Signal transduction;Signal transduction;Infectious diseases;Signal transduction;Nucleotide metabolism;Endocrine system;Signal transduction;Infectious diseases;Circulatory system;Endocrine and metabolic diseases;Digestive system;Cardiovascular diseases;Circulatory system;Development and regeneration;Endocrine system;Immu…	ko01100//Metabolic pathways;ko04714//Thermogenesis;ko05200//Pathways in cancer;ko04024//cAMP signaling pathway;ko04020//Calcium signaling pathway;ko04015//Rap1 signaling pathway;ko05166//HTLV-I infection;ko04022//cGMP - PKG signaling pathway;ko00230//Purine metabolism;ko04921//Oxytocin signaling pathway;ko04371//Apelin signaling pathway;ko05163//Human cytomegalovirus infection;ko04261//Adrenergic…	K08049;K08049;K08049;K08049;K08049;K08049;K08049;K08049;K08049;K08049;K08049;K08049;K08049;K08049;K08049;K08049;K08049;K08049;K08049;K08049;K08049;K08049;K08049;K08049;K08049;K08049;K08049;K08049;K08049;K08049;K08049;K08049;K08049;K08049;K08049;K08049;K08049;K08049;K08049;K08049;K08049;K08049;K08049;K08049;K08049;K08049;K08049;K08049;K08049;K08049;K08049;K08049	-	-	-
MSTRG.23834	3.553	1.627	1.857	lva	golgin subfamily B member 1-like [Nilaparvata lugens]	-	-	-	-	-	-	-
MSTRG.23839	2.743	1.123	1.187	ADCY9	LOW QUALITY PROTEIN: adenylate cyclase type 9-like [Nilaparvata lugens]	Metabolism;Organismal Systems;Human Diseases;Environmental Information Processing;Environmental Information Processing;Environmental Information Processing;Human Diseases;Environmental Information Processing;Metabolism;Organismal Systems;Environmental Information Processing;Human Diseases;Organismal Systems;Human Diseases;Organismal Systems;Human Diseases;Organismal Systems;Organismal Systems;Org…	Global and overview maps;Environmental adaptation;Cancers;Signal transduction;Signal transduction;Signal transduction;Infectious diseases;Signal transduction;Nucleotide metabolism;Endocrine system;Signal transduction;Infectious diseases;Circulatory system;Endocrine and metabolic diseases;Digestive system;Cardiovascular diseases;Circulatory system;Development and regeneration;Endocrine system;Immu…	ko01100//Metabolic pathways;ko04714//Thermogenesis;ko05200//Pathways in cancer;ko04024//cAMP signaling pathway;ko04020//Calcium signaling pathway;ko04015//Rap1 signaling pathway;ko05166//HTLV-I infection;ko04022//cGMP - PKG signaling pathway;ko00230//Purine metabolism;ko04921//Oxytocin signaling pathway;ko04371//Apelin signaling pathway;ko05163//Human cytomegalovirus infection;ko04261//Adrenergic…	K08049;K08049;K08049;K08049;K08049;K08049;K08049;K08049;K08049;K08049;K08049;K08049;K08049;K08049;K08049;K08049;K08049;K08049;K08049;K08049;K08049;K08049;K08049;K08049;K08049;K08049;K08049;K08049;K08049;K08049;K08049;K08049;K08049;K08049;K08049;K08049;K08049;K08049;K08049;K08049;K08049;K08049;K08049;K08049;K08049;K08049;K08049;K08049;K08049;K08049;K08049;K08049	-	-	-
MSTRG.23892	4.033	0.153	0.2	--	kazal-type proteinase inhibitor [Lasius niger]	-	-	-	-	-	-	-
MSTRG.23935	6.44	1.99	2.6	--	hypothetical protein LSTR_LSTR003929 [Laodelphax striatellus]	-	-	-	-	-	-	-
MSTRG.24440	2.35	0.64	0.497	TY3B-G	polyprotein [Mizuhopecten yessoensis]	-	-	-	-	-	-	-
MSTRG.2449	55.27	19.123	18.34	PDSS2	LOW QUALITY PROTEIN: decaprenyl-diphosphate synthase subunit 2 [Nilaparvata lugens]	Metabolism	Metabolism of terpenoids and polyketides	ko00900//Terpenoid backbone biosynthesis	K12505	-	-	-
MSTRG.24665	16.373	3.343	3.27	D1	protein D2-like isoform X2 [Nilaparvata lugens]	-	-	-	-	-	-	-
MSTRG.25015	7.01	0.85	0.567	Gld	glucose dehydrogenase [FAD, quinone]-like [Nilaparvata lugens]	Metabolism;Metabolism	Global and overview maps;Amino acid metabolism	ko01100//Metabolic pathways;ko00260//Glycine, serine and threonine metabolism	K00108;K00108	-	-	-
MSTRG.2534	1.08	0.31	0.397	--	-	-	-	-	-	-	-	-
MSTRG.25433	285.04	4.953	7.783	--	-	-	-	-	-	-	-	-
MSTRG.25434	506.93	46.58	62.523	--	GATA zinc finger domain-containing protein 14-like, partial [Nilaparvata lugens]	-	-	-	-	-	-	-
MSTRG.25527	504.31	3.547	2.06	--	-	-	-	-	-	-	-	-
MSTRG.25708	1.693	0.197	0.3	--	hypothetical protein LSTR_LSTR007419 [Laodelphax striatellus]	-	-	-	-	-	-	-
MSTRG.26008	2.053	0.68	0.73	--	uncharacterized protein LOC111052038 [Nilaparvata lugens]	-	-	-	-	-	-	-
MSTRG.26158	3.89	1.727	1.283	DPCD	protein DPCD [Nilaparvata lugens]	-	-	-	-	-	-	-
MSTRG.2618	15.443	5.397	4.1	vars1	valine--tRNA ligase isoform X2 [Nilaparvata lugens]	Genetic Information Processing	Translation	ko00970//Aminoacyl-tRNA biosynthesis	K01873	-	-	-
MSTRG.26349	9.447	4.413	4.957	NUP43	nucleoporin Nup43-like [Nilaparvata lugens]	Genetic Information Processing	Translation	ko03013//RNA transport	K14305	-	-	-
MSTRG.2654	29.333	15.143	13.843	SI	lysosomal alpha-glucosidase [Sogatella furcifera]	Metabolism;Cellular Processes;Metabolism;Metabolism	Global and overview maps;Transport and catabolism;Carbohydrate metabolism;Carbohydrate metabolism	ko01100//Metabolic pathways;ko04142//Lysosome;ko00500//Starch and sucrose metabolism;ko00052//Galactose metabolism	K12316;K12316;K12316;K12316	-	-	-
MSTRG.27031	8.22	3.787	3.687	mtTFB2	dimethyladenosine transferase 2, mitochondrial isoform X2 [Zootermopsis nevadensis]	-	-	-	-	-	-	-
MSTRG.27175	3.587	1.663	1.69	DDX5	ATP-dependent RNA helicase dbp2-like [Nilaparvata lugens]	Genetic Information Processing;Human Diseases;Human Diseases	Transcription;Cancers;Cancers	ko03040//Spliceosome;ko05202//Transcriptional misregulation in cancers;ko05205//Proteoglycans in cancer	K12823;K12823;K12823	-	-	-
MSTRG.27232	10.373	4.193	5.54	--	protein giant-lens-like [Myzus persicae]	Environmental Information Processing;Organismal Systems	Signal transduction;Development	ko04013//MAPK signaling pathway - fly;ko04320//Dorso-ventral axis formation	K02104;K02104	-	-	-
MSTRG.27247	7.51	3.523	3.57	Fen1	flap endonuclease 1 [Nilaparvata lugens]	Genetic Information Processing;Genetic Information Processing;Genetic Information Processing	Replication and repair;Replication and repair;Replication and repair	ko03030//DNA replication;ko03410//Base excision repair;ko03450//Non-homologous end-joining	K04799;K04799;K04799	-	-	-
MSTRG.27251	11.823	5.413	6.12	lec-1	galectin-4-like [Nilaparvata lugens]	-	-	-	-	-	-	-
MSTRG.2726	3.75	1.243	1.543	--	Superoxide dismutase [Cu-Zn] B [Melipona quadrifasciata]	-	-	-	-	-	-	-
MSTRG.27383	56.71	22.1	26.463	se	glutathione s-transferase O1 [Sogatella furcifera]	Metabolism;Metabolism;Metabolism	Global and overview maps;Metabolism of other amino acids;Metabolism of cofactors and vitamins	ko01100//Metabolic pathways;ko00480//Glutathione metabolism;ko00790//Folate biosynthesis	K00310;K00310;K00310	-	-	-
MSTRG.27460	2.863	1.277	1.187	Mettl9	methyltransferase-like protein 9 isoform X1 [Nilaparvata lugens]	-	-	-	-	-	-	-
MSTRG.27684	38.78	11.85	14.137	--	nucleolar protein 58, partial [Nilaparvata lugens]	-	-	-	-	-	-	-
MSTRG.27685	2.673	0.763	1.147	--	nucleolar protein 58, partial [Nilaparvata lugens]	-	-	-	-	-	-	-
MSTRG.2783	1.077	0.413	0.32	SLF1	tonsoku-like protein [Nilaparvata lugens]	-	-	-	-	-	-	-
MSTRG.27838	2.44	1.04	1.243	--	cell adhesion molecule 2-like [Halyomorpha halys]	-	-	-	-	-	-	-
MSTRG.2792	4.16	2.133	1.747	Nup205	nuclear pore complex protein Nup205-like [Nilaparvata lugens]	Genetic Information Processing	Translation	ko03013//RNA transport	K14310	-	-	-
MSTRG.28011	5.397	2.41	2.037	mle	ATP-dependent RNA helicase A [Nilaparvata lugens]	-	-	-	-	-	-	-
MSTRG.28015	5.653	1.877	2.057	dl	dorsal, partial [Sogatella furcifera]	Human Diseases;Human Diseases;Environmental Information Processing;Organismal Systems	Cancers;Cancers;Signal transduction;Immune system	ko05202//Transcriptional misregulation in cancers;ko05203//Viral carcinogenesis;ko04014//Ras signaling pathway;ko04624//Toll and Imd signaling pathway	K09254;K09254;K09254;K09254	-	-	-
MSTRG.28590	287.837	94.227	88.03	--	acidic leucine-rich nuclear phosphoprotein 32 family member B-like [Nilaparvata lugens]	-	-	-	-	-	-	-
MSTRG.28763	11.913	3.163	2.44	PNLIPRP1	phospholipase A1 1-like [Nilaparvata lugens]	Metabolism;Organismal Systems;Metabolism;Organismal Systems	Global and overview maps;Digestive system;Lipid metabolism;Digestive system	ko01100//Metabolic pathways;ko04972//Pancreatic secretion;ko00561//Glycerolipid metabolism;ko04975//Fat digestion and absorption	K14074;K14074;K14074;K14074	GO:0005576//extracellular region	GO:0016788//hydrolase activity, acting on ester bonds	GO:0008152//metabolic process;GO:0044763//single-organism cellular process
MSTRG.28765	1.833	0.407	0.243	PNLIPRP1	phospholipase A1 1-like [Nilaparvata lugens]	Metabolism;Organismal Systems;Metabolism;Organismal Systems	Global and overview maps;Digestive system;Lipid metabolism;Digestive system	ko01100//Metabolic pathways;ko04972//Pancreatic secretion;ko00561//Glycerolipid metabolism;ko04975//Fat digestion and absorption	K14074;K14074;K14074;K14074	GO:0005576//extracellular region	GO:0016788//hydrolase activity, acting on ester bonds	GO:0008152//metabolic process;GO:0044763//single-organism cellular process
MSTRG.28782	1.423	0.477	0.497	--	pao retrotransposon peptidase [Lasius niger]	-	-	-	-	-	-	-
MSTRG.28911	3.33	1.583	2	--	Myb DNA-bind 5 domain-containing protein, partial [Aphis craccivora]	-	-	-	-	-	-	-
MSTRG.29212	14.983	6.227	7.473	LYST	lysosomal-trafficking regulator-like [Nilaparvata lugens]	-	-	-	-	-	-	-
MSTRG.29215	1.033	0.23	0.45	--	lysosomal-trafficking regulator-like [Nilaparvata lugens]	-	-	-	-	-	-	GO:0002376//immune system process;GO:0044763//single-organism cellular process;GO:0050896//response to stimulus
MSTRG.29417	9.443	4.413	6.037	--	calponin homology domain-containing protein DDB_G0272472 isoform X1 [Nilaparvata lugens]	-	-	-	-	-	-	-
MSTRG.29894	210.913	109.98	98.743	ECHS1	enoyl-CoA hydratase, mitochondrial-like [Nilaparvata lugens]	Metabolism;Metabolism;Metabolism;Metabolism;Metabolism;Metabolism;Metabolism;Metabolism;Metabolism;Metabolism;Metabolism	Global and overview maps;Global and overview maps;Global and overview maps;Amino acid metabolism;Lipid metabolism;Amino acid metabolism;Lipid metabolism;Carbohydrate metabolism;Amino acid metabolism;Metabolism of other amino acids;Carbohydrate metabolism	ko01100//Metabolic pathways;ko01200//Carbon metabolism;ko01212//Fatty acid metabolism;ko00310//Lysine degradation;ko00071//Fatty acid degradation;ko00280//Valine, leucine and isoleucine degradation;ko00062//Fatty acid elongation;ko00640//Propanoate metabolism;ko00380//Tryptophan metabolism;ko00410//beta-Alanine metabolism;ko00650//Butanoate metabolism	K07511;K07511;K07511;K07511;K07511;K07511;K07511;K07511;K07511;K07511;K07511	GO:0031988//membrane-bounded vesicle;GO:0043232//intracellular non-membrane-bounded organelle;GO:0043234//protein complex;GO:0044429//mitochondrial part	GO:0016836//hydro-lyase activity	GO:0009062//fatty acid catabolic process
MSTRG.30161	1.337	0.057	0.023	--	hypothetical protein LSTR_LSTR007444 [Laodelphax striatellus]	-	-	-	-	-	-	-
MSTRG.30273	227.29	5.083	4.91	LST	sulfotransferase 1C4-like [Nilaparvata lugens]	-	-	-	-	-	-	-
MSTRG.30284	26.72	11.777	9.907	Gaa	lysosomal alpha-glucosidase [Sogatella furcifera]	Metabolism;Cellular Processes;Metabolism;Metabolism	Global and overview maps;Transport and catabolism;Carbohydrate metabolism;Carbohydrate metabolism	ko01100//Metabolic pathways;ko04142//Lysosome;ko00500//Starch and sucrose metabolism;ko00052//Galactose metabolism	K12316;K12316;K12316;K12316	-	-	-
MSTRG.30416	17.817	7.37	6.457	Cyp6a20	cytochrome P450 CYP6AX3 [Sogatella furcifera]	-	-	-	-	-	-	-
MSTRG.31051	53.447	27.55	26.053	UCHL3	ubiquitin carboxyl-terminal hydrolase isozyme L3 isoform X1 [Nilaparvata lugens]	-	-	-	-	-	-	-
MSTRG.31105	141.87	70.783	57.423	IFI30	GILT-like protein 1 isoform X1 [Nilaparvata lugens]	-	-	-	-	-	-	-
MSTRG.31160	7.463	4.313	3.677	NUP205	nuclear pore complex protein Nup205 isoform X1 [Cryptotermes secundus]	Genetic Information Processing	Translation	ko03013//RNA transport	K14310	-	-	-
MSTRG.31246	1.99	0.943	1.237	caup	homeobox protein caupolican-like [Photinus pyralis]	-	-	-	-	-	-	-
MSTRG.31317	36.227	17.343	13.323	LSM2	U6 snRNA-associated Sm-like protein LSm2 [Nilaparvata lugens]	Genetic Information Processing;Genetic Information Processing	Transcription;Folding, sorting and degradation	ko03040//Spliceosome;ko03018//RNA degradation	K12621;K12621	-	-	-
MSTRG.314	5.06	2.263	2.343	inip	SOSS complex subunit C homolog B [Nilaparvata lugens]	-	-	-	-	-	-	-
MSTRG.31507	3.673	2.087	1.793	--	microtubule-associated protein futsch-like isoform x1 protein [Lasius niger]	-	-	-	-	-	-	-
MSTRG.31774	2.073	0.683	0.723	--	zinc finger protein 337-like isoform X2 [Nilaparvata lugens]	-	-	-	-	-	-	-
MSTRG.31937	5.457	2.543	2.293	Gen	flap endonuclease GEN homolog 1-like [Nilaparvata lugens]	-	-	-	-	GO:0043227//membrane-bounded organelle;GO:0043229//intracellular organelle	GO:0004520//endodeoxyribonuclease activity	GO:0006281//DNA repair;GO:0010564//regulation of cell cycle process;GO:0033043//regulation of organelle organization;GO:0071139//resolution of recombination intermediates
MSTRG.31942	3.23	1.47	1.927	--	hypothetical protein LSTR_LSTR001772 [Laodelphax striatellus]	-	-	-	-	-	-	-
MSTRG.32051	87.167	0	0.113	--	histidine-rich glycoprotein-like [Nilaparvata lugens]	-	-	-	-	-	-	-
MSTRG.32055	663.64	70.07	45.85	--	hypothetical protein LSTR_LSTR001863 [Laodelphax striatellus]	-	-	-	-	-	-	-
MSTRG.32059	191.617	0.253	0.263	--	histidine-rich glycoprotein-like [Nilaparvata lugens]	-	-	-	-	-	-	-
MSTRG.32159	19.747	6.803	7.26	Mylk	titin-like [Nilaparvata lugens]	Human Diseases;Human Diseases	Cardiovascular diseases;Cardiovascular diseases	ko05414//Dilated cardiomyopathy (DCM);ko05410//Hypertrophic cardiomyopathy (HCM)	K12567;K12567	GO:0030017//sarcomere	GO:0005515//protein binding	-
MSTRG.32162	8.803	3.063	3.623	unc-89	titin-like [Nilaparvata lugens]	Human Diseases;Human Diseases	Cardiovascular diseases;Cardiovascular diseases	ko05414//Dilated cardiomyopathy (DCM);ko05410//Hypertrophic cardiomyopathy (HCM)	K12567;K12567	GO:0031674//I band	GO:0008092//cytoskeletal protein binding	-
MSTRG.32164	23.343	8.44	10.25	CCDC141	titin-like [Nilaparvata lugens]	Human Diseases;Human Diseases	Cardiovascular diseases;Cardiovascular diseases	ko05414//Dilated cardiomyopathy (DCM);ko05410//Hypertrophic cardiomyopathy (HCM)	K12567;K12567	GO:0031674//I band	GO:0008092//cytoskeletal protein binding	-
MSTRG.32167	9.4	0.973	1.677	--	LOW QUALITY PROTEIN: SEC14 domain and spectrin repeat-containing protein 1 [Nilaparvata lugens]	Human Diseases;Human Diseases	Cardiovascular diseases;Cardiovascular diseases	ko05414//Dilated cardiomyopathy (DCM);ko05410//Hypertrophic cardiomyopathy (HCM)	K12567;K12567	-	-	-
MSTRG.32168	28.127	4.09	4.89	sestd1-a	PREDICTED: SEC14 domain and spectrin repeat-containing protein 1-B [Bemisia tabaci]	-	-	-	-	-	GO:1902936//phosphatidylinositol bisphosphate binding	-
MSTRG.32291	14.447	6.733	6.897	Nelf-E	negative elongation factor E, partial [Asbolus verrucosus]	-	-	-	-	GO:0008023//transcription elongation factor complex	GO:0044822//poly(A) RNA binding	GO:0000122//negative regulation of transcription from RNA polymerase II promoter;GO:0006354//DNA-templated transcription, elongation;GO:0010628//positive regulation of gene expression;GO:0030154//cell differentiation;GO:0031062//positive regulation of histone methylation;GO:0031441//negative regulation of mRNA 3'-end processing;GO:0043410//positive regulation of MAPK cascade;GO:0044403//symbiosis…
MSTRG.3233	2.903	0.97	1.127	SI	lysosomal alpha-glucosidase [Sogatella furcifera]	Metabolism;Cellular Processes;Metabolism;Metabolism	Global and overview maps;Transport and catabolism;Carbohydrate metabolism;Carbohydrate metabolism	ko01100//Metabolic pathways;ko04142//Lysosome;ko00500//Starch and sucrose metabolism;ko00052//Galactose metabolism	K12316;K12316;K12316;K12316	GO:0000323//lytic vacuole;GO:0098589//membrane region	GO:0005488//binding;GO:0090599//alpha-glucosidase activity	GO:0003011//involuntary skeletal muscle contraction;GO:0005977//glycogen metabolic process;GO:0007033//vacuole organization;GO:0007584//response to nutrient;GO:0007610//behavior;GO:0009725//response to hormone;GO:0009743//response to carbohydrate;GO:0009887//organ morphogenesis;GO:0019725//cellular homeostasis;GO:0033993//response to lipid;GO:0050905//neuromuscular process
MSTRG.3238	21.197	10.777	8.84	GAA	lysosomal alpha-glucosidase [Sogatella furcifera]	Metabolism;Cellular Processes;Metabolism;Metabolism	Global and overview maps;Transport and catabolism;Carbohydrate metabolism;Carbohydrate metabolism	ko01100//Metabolic pathways;ko04142//Lysosome;ko00500//Starch and sucrose metabolism;ko00052//Galactose metabolism	K12316;K12316;K12316;K12316	GO:0000323//lytic vacuole;GO:0005774//vacuolar membrane;GO:0005775//vacuolar lumen;GO:0031988//membrane-bounded vesicle	GO:0005488//binding;GO:0090599//alpha-glucosidase activity	GO:0003011//involuntary skeletal muscle contraction;GO:0005977//glycogen metabolic process;GO:0005984//disaccharide metabolic process;GO:0007033//vacuole organization;GO:0007610//behavior;GO:0009887//organ morphogenesis;GO:0019318//hexose metabolic process;GO:0019725//cellular homeostasis;GO:0050905//neuromuscular process;GO:0051651//maintenance of location in cell;GO:0060047//heart contraction
MSTRG.32769	391.727	42.197	33.333	Ccp84Ab	cuticle protein 8 [Nilaparvata lugens]	-	-	-	-	-	GO:0005214//structural constituent of chitin-based cuticle	GO:0042335//cuticle development
MSTRG.32773	136	7.607	6.557	ACP21	cuticle protein 7-like [Nilaparvata lugens]	-	-	-	-	-	-	GO:0044699//single-organism process
MSTRG.32775	35.833	13.067	12.873	ACP21	cuticular protein [Nilaparvata lugens]	-	-	-	-	GO:0044421//extracellular region part	GO:0005198//structural molecule activity	GO:0000003//reproduction
MSTRG.32777	9.137	0.88	1.39	ACP21	cuticular protein [Nilaparvata lugens]	-	-	-	-	-	-	-
MSTRG.32778	11.527	4.333	5.797	ACP21	cuticle protein 7-like [Nilaparvata lugens]	-	-	-	-	-	GO:0005214//structural constituent of chitin-based cuticle	GO:0007275//multicellular organism development;GO:0030154//cell differentiation;GO:0048856//anatomical structure development
MSTRG.32790	5.99	1.82	2.027	ACP21	cuticular protein [Nilaparvata lugens]	-	-	-	-	-	GO:0005198//structural molecule activity	-
MSTRG.32937	24.967	11.06	10.977	--	trithorax group protein osa-like [Nilaparvata lugens]	Organismal Systems;Human Diseases	Environmental adaptation;Cancers	ko04714//Thermogenesis;ko05225//Hepatocellular carcinoma	K11653;K11653	-	-	-
MSTRG.33278	40.573	7.7	8.47	--	cuticular protein [Nilaparvata lugens]	Genetic Information Processing;Human Diseases	Translation;Infectious diseases	ko03013//RNA transport;ko05164//Influenza A	K14297;K14297	-	-	GO:0008152//metabolic process
MSTRG.33352	16.393	9.14	7.89	Smyd4	SET and MYND domain-containing protein 4-like [Nilaparvata lugens]	Metabolism;Metabolism	Global and overview maps;Amino acid metabolism	ko01100//Metabolic pathways;ko00310//Lysine degradation	K11426;K11426	-	-	-
MSTRG.33448	16.107	3.66	7.25	--	Integrase catalytic domain-containing protein [Aphis craccivora]	-	-	-	-	-	-	-
MSTRG.33501	15.873	5.953	6.577	--	leucine-rich repeat transmembrane neuronal protein 2-like [Nilaparvata lugens]	-	-	-	-	-	-	-
MSTRG.33757	9.567	4.09	4.647	DMD	dystrophin, isoforms A/C/F/G/H-like, partial [Nilaparvata lugens]	-	-	-	-	-	-	-
MSTRG.33770	79.47	0.377	0.327	--	cuticular protein [Nilaparvata lugens]	Human Diseases;Human Diseases;Environmental Information Processing;Cellular Processes;Organismal Systems;Organismal Systems;Environmental Information Processing;Human Diseases;Human Diseases;Human Diseases	Cancers;Infectious diseases;Signal transduction;Cellular community - eukaryotes;Digestive system;Endocrine system;Signaling molecules and interaction;Infectious diseases;Endocrine and metabolic diseases;Cancers	ko05200//Pathways in cancer;ko05165//Human papillomavirus infection;ko04151//PI3K-Akt signaling pathway;ko04510//Focal adhesion;ko04974//Protein digestion and absorption;ko04926//Relaxin signaling pathway;ko04512//ECM-receptor interaction;ko05146//Amoebiasis;ko04933//AGE-RAGE signaling pathway in diabetic complications;ko05222//Small cell lung cancer	K06237;K06237;K06237;K06237;K06237;K06237;K06237;K06237;K06237;K06237	-	-	-
MSTRG.33833	51.133	11.39	8.87	--	odorant-binding protein 7 [Sogatella furcifera]	-	-	-	-	-	-	-
MSTRG.3384	2.243	0.597	0.6	Claspin	claspin-like isoform X1 [Nilaparvata lugens]	-	-	-	-	GO:0031981//nuclear lumen	GO:0032403//protein complex binding	GO:0000076//DNA replication checkpoint;GO:0000077//DNA damage checkpoint;GO:0006259//DNA metabolic process;GO:0012501//programmed cell death;GO:0022411//cellular component disassembly;GO:0045860//positive regulation of protein kinase activity
MSTRG.33856	3.343	1.187	1.197	Ogg1	N-glycosylase/DNA lyase isoform X2 [Zootermopsis nevadensis]	Genetic Information Processing	Replication and repair	ko03410//Base excision repair	K03660	-	-	-
MSTRG.33883	69.083	35.853	33.663	AnxB9	seminal fluid protein [Nilaparvata lugens]	-	-	-	-	GO:0044444//cytoplasmic part	GO:0005543//phospholipid binding;GO:0008092//cytoskeletal protein binding;GO:0046872//metal ion binding	GO:0007163//establishment or maintenance of cell polarity;GO:0007450//dorsal/ventral pattern formation, imaginal disc;GO:0008105//asymmetric protein localization;GO:0010796//regulation of multivesicular body size;GO:0016197//endosomal transport
MSTRG.34003	217.353	83.98	63.517	Hsc70-3	heat shock cognate protein 70 [Laodelphax striatellus]	Genetic Information Processing;Organismal Systems;Human Diseases;Genetic Information Processing	Folding, sorting and degradation;Endocrine system;Neurodegenerative diseases;Folding, sorting and degradation	ko04141//Protein processing in endoplasmic reticulum;ko04918//Thyroid hormone synthesis;ko05020//Prion diseases;ko03060//Protein export	K09490;K09490;K09490;K09490	GO:0005924//cell-substrate adherens junction;GO:0031227//intrinsic component of endoplasmic reticulum membrane;GO:0043232//intracellular non-membrane-bounded organelle;GO:0043234//protein complex;GO:0044421//extracellular region part;GO:0048770//pigment granule	GO:0001071//nucleic acid binding transcription factor activity;GO:0016628//oxidoreductase activity, acting on the CH-CH group of donors, NAD or NADP as acceptor;GO:0016836//hydro-lyase activity;GO:0017111//nucleoside-triphosphatase activity;GO:0032550//purine ribonucleoside binding;GO:0043021//ribonucleoprotein complex binding;GO:0044389//ubiquitin-like protein ligase binding;GO:0046872//metal io…	GO:0001775//cell activation;GO:0006778//porphyrin-containing compound metabolic process;GO:0006887//exocytosis;GO:0006984//ER-nucleus signaling pathway;GO:0007599//hemostasis;GO:0009267//cellular response to starvation;GO:0017015//regulation of transforming growth factor beta receptor signaling pathway;GO:0018130//heterocycle biosynthetic process;GO:0022402//cell cycle process;GO:0030334//regulat…
MSTRG.34004	8.86	3.407	2.8	Hsc70-3	heat shock cognate protein 70 [Laodelphax striatellus]	Genetic Information Processing;Organismal Systems;Human Diseases;Genetic Information Processing	Folding, sorting and degradation;Endocrine system;Neurodegenerative diseases;Folding, sorting and degradation	ko04141//Protein processing in endoplasmic reticulum;ko04918//Thyroid hormone synthesis;ko05020//Prion diseases;ko03060//Protein export	K09490;K09490;K09490;K09490	GO:0005924//cell-substrate adherens junction;GO:0031227//intrinsic component of endoplasmic reticulum membrane;GO:0043232//intracellular non-membrane-bounded organelle;GO:0043234//protein complex;GO:0044421//extracellular region part;GO:0048770//pigment granule	GO:0001071//nucleic acid binding transcription factor activity;GO:0016628//oxidoreductase activity, acting on the CH-CH group of donors, NAD or NADP as acceptor;GO:0016836//hydro-lyase activity;GO:0017111//nucleoside-triphosphatase activity;GO:0032550//purine ribonucleoside binding;GO:0043021//ribonucleoprotein complex binding;GO:0044389//ubiquitin-like protein ligase binding;GO:0046872//metal io…	GO:0001775//cell activation;GO:0006778//porphyrin-containing compound metabolic process;GO:0006887//exocytosis;GO:0006984//ER-nucleus signaling pathway;GO:0007599//hemostasis;GO:0009267//cellular response to starvation;GO:0017015//regulation of transforming growth factor beta receptor signaling pathway;GO:0018130//heterocycle biosynthetic process;GO:0022402//cell cycle process;GO:0030334//regulat…
MSTRG.34041	11.373	0.167	0.247	--	hypothetical protein LSTR_LSTR012489 [Laodelphax striatellus]	-	-	-	-	-	-	-
MSTRG.34060	12.87	6.507	6.173	pho-1	lysosomal acid phosphatase-like [Nilaparvata lugens]	Cellular Processes	Transport and catabolism	ko04144//Endocytosis	K12483	-	-	-
MSTRG.34237	15.12	7.663	7.41	fdxr	NADPH:adrenodoxin oxidoreductase, mitochondrial-like [Nilaparvata lugens]	-	-	-	-	-	-	-
MSTRG.34247	0.46	0.077	0.05	--	hypothetical protein LSTR_LSTR013687 [Laodelphax striatellus]	-	-	-	-	-	-	-
MSTRG.34473	902.72	75.447	150.42	--	hypothetical protein LSTR_LSTR008167 [Laodelphax striatellus]	-	-	-	-	-	-	-
MSTRG.34474	53.047	4.87	9.093	--	hypothetical protein LSTR_LSTR008167 [Laodelphax striatellus]	-	-	-	-	-	-	-
MSTRG.34530	147.843	1.23	0.86	--	glycine-rich cuticular protein [Nilaparvata lugens]	-	-	-	-	-	-	-
MSTRG.34531	4.15	0.053	0.057	--	glycine-rich cuticular protein [Nilaparvata lugens]	-	-	-	-	-	-	-
MSTRG.34675	2.557	1.357	1.22	fam20b	glycosaminoglycan xylosylkinase [Nilaparvata lugens]	-	-	-	-	-	-	-
MSTRG.34798	7.833	1.193	0.61	--	hypothetical protein LSTR_LSTR012521 [Laodelphax striatellus]	-	-	-	-	-	-	-
MSTRG.34961	1.607	0	0.017	nrf-6	nose resistant to fluoxetine protein 6-like [Nilaparvata lugens]	-	-	-	-	-	-	-
MSTRG.34962	40.683	1.013	1.363	nrf-6	nose resistant to fluoxetine protein 6-like [Nilaparvata lugens]	-	-	-	-	-	-	-
MSTRG.34969	11.39	0.353	0.427	--	nose resistant to fluoxetine protein 6-like [Cimex lectularius]	-	-	-	-	-	-	-
MSTRG.3501	132.147	59.997	67.91	DDX17	DEAD-box ATP-dependent RNA helicase 20-like isoform X2 [Nilaparvata lugens]	Genetic Information Processing;Human Diseases;Human Diseases	Transcription;Cancers;Cancers	ko03040//Spliceosome;ko05202//Transcriptional misregulation in cancers;ko05205//Proteoglycans in cancer	K12823;K12823;K12823	-	-	-
MSTRG.35331	26.383	10.52	8.493	MAFF	transcription factor MafK [Nilaparvata lugens]	-	-	-	-	-	-	-
MSTRG.35558	26.367	13.6	13.133	--	hypothetical protein LSTR_LSTR003296 [Laodelphax striatellus]	-	-	-	-	-	-	-
MSTRG.35605	2.913	1.38	1.397	ANPEP	aminopeptidase N isoform X1 [Nilaparvata lugens]	Metabolism;Metabolism;Organismal Systems;Organismal Systems	Global and overview maps;Metabolism of other amino acids;Endocrine system;Immune system	ko01100//Metabolic pathways;ko00480//Glutathione metabolism;ko04614//Renin-angiotensin system;ko04640//Hematopoietic cell lineage	K11140;K11140;K11140;K11140	-	-	-
MSTRG.3583	2.897	1.253	1.37	--	-	-	-	-	-	-	-	-
MSTRG.35909	1.94	0.033	0.12	--	hypothetical protein LSTR_LSTR009318 [Laodelphax striatellus]	-	-	-	-	-	-	-
MSTRG.35925	23.72	2.213	2.447	--	PREDICTED: loricrin-like [Bemisia tabaci]	-	-	-	-	-	-	-
MSTRG.35966	5.773	0.863	0.907	Lip1	lipase 1-like [Nilaparvata lugens]	Cellular Processes;Organismal Systems;Metabolism	Transport and catabolism;Digestive system;Lipid metabolism	ko04142//Lysosome;ko04979//Cholesterol metabolism;ko00100//Steroid biosynthesis	K01052;K01052;K01052	-	GO:0016298//lipase activity	GO:0044699//single-organism process;GO:0055088//lipid homeostasis
MSTRG.36373	12.203	5.843	8.19	--	hypothetical protein LSTR_LSTR008666 [Laodelphax striatellus]	-	-	-	-	-	-	-
MSTRG.36382	32.31	11.467	12.913	SLC25A27	mitochondrial uncoupling protein 4 [Nilaparvata lugens]	-	-	-	-	GO:0019866//organelle inner membrane;GO:0031224//intrinsic component of membrane;GO:0043231//intracellular membrane-bounded organelle;GO:0044297//cell body	GO:0005215//transporter activity	GO:0006818//hydrogen transport;GO:0010827//regulation of glucose transport;GO:0042127//regulation of cell proliferation;GO:0042981//regulation of apoptotic process;GO:0043583//ear development;GO:0045837//negative regulation of membrane potential;GO:0051560//mitochondrial calcium ion homeostasis;GO:1902582//single-organism intracellular transport
MSTRG.3640	3.203	1.447	1.137	DPY30	protein dpy-30 homolog [Nilaparvata lugens]	-	-	-	-	GO:0031984//organelle subcompartment;GO:0035097//histone methyltransferase complex	GO:0046983//protein dimerization activity	GO:0010467//gene expression;GO:0034645//cellular macromolecule biosynthetic process;GO:0034968//histone lysine methylation;GO:1902582//single-organism intracellular transport
MSTRG.3646	26.67	11.667	14.987	--	protein NYNRIN-like [Aphis craccivora]	-	-	-	-	-	-	-
MSTRG.3655	3.02	1.2	1.333	--	condensin complex subunit 3-like [Nilaparvata lugens]	-	-	-	-	GO:0005694//chromosome	-	-
MSTRG.36562	7.653	3.593	3.687	Vps13	vacuolar protein sorting-associated protein 13 [Nilaparvata lugens]	-	-	-	-	-	-	-
MSTRG.36634	3.273	0.747	0.74	IHH	indian hedgehog protein [Nilaparvata lugens]	Environmental Information Processing	Signal transduction	ko04341//Hedgehog signaling pathway - fly	K06224	GO:0031012//extracellular matrix;GO:0043005//neuron projection;GO:0043231//intracellular membrane-bounded organelle;GO:0044421//extracellular region part;GO:0044444//cytoplasmic part;GO:0098589//membrane region	GO:0003824//catalytic activity;GO:0005102//receptor binding;GO:0043236//laminin binding;GO:0046872//metal ion binding;GO:0097367//carbohydrate derivative binding	GO:0000122//negative regulation of transcription from RNA polymerase II promoter;GO:0000904//cell morphogenesis involved in differentiation;GO:0001570//vasculogenesis;GO:0001649//osteoblast differentiation;GO:0001667//ameboidal-type cell migration;GO:0001708//cell fate specification;GO:0001894//tissue homeostasis;GO:0002053//positive regulation of mesenchymal cell proliferation;GO:0002244//hemato…
MSTRG.36803	25.797	5.123	6.507	--	transcription activator MSS11-like [Cimex lectularius]	-	-	-	-	-	-	-
MSTRG.37186	10.933	5.16	5.683	MYORG	myogenesis-regulating glycosidase isoform X3 [Halyomorpha halys]	-	-	-	-	-	-	-
MSTRG.37219	4.213	2.02	1.833	Creb3l4	cyclic AMP response element-binding protein A-like [Nilaparvata lugens]	Human Diseases;Organismal Systems;Human Diseases;Environmental Information Processing;Environmental Information Processing;Human Diseases;Environmental Information Processing;Human Diseases;Human Diseases;Organismal Systems;Human Diseases;Organismal Systems;Environmental Information Processing;Organismal Systems;Organismal Systems;Organismal Systems;Organismal Systems;Human Diseases;Human Disease…	Neurodegenerative diseases;Environmental adaptation;Infectious diseases;Signal transduction;Signal transduction;Infectious diseases;Signal transduction;Cancers;Infectious diseases;Circulatory system;Endocrine and metabolic diseases;Endocrine system;Signal transduction;Endocrine system;Endocrine system;Endocrine system;Nervous system;Substance dependence;Endocrine and metabolic diseases;Endocrine …	ko05016//Huntington disease;ko04714//Thermogenesis;ko05165//Human papillomavirus infection;ko04024//cAMP signaling pathway;ko04151//PI3K-Akt signaling pathway;ko05166//HTLV-I infection;ko04022//cGMP - PKG signaling pathway;ko05203//Viral carcinogenesis;ko05163//Human cytomegalovirus infection;ko04261//Adrenergic signaling in cardiomyocytes;ko04934//Cushing syndrome;ko04925//Aldosterone synthesis …	K09048;K09048;K09048;K09048;K09048;K09048;K09048;K09048;K09048;K09048;K09048;K09048;K09048;K09048;K09048;K09048;K09048;K09048;K09048;K09048;K09048;K09048;K09048;K09048;K09048;K09048;K09048;K09048;K09048;K09048;K09048;K09048;K09048	-	-	-
MSTRG.37220	37.167	15.81	16.88	Creb3l4	cyclic AMP response element-binding protein A-like [Nilaparvata lugens]	Human Diseases;Organismal Systems;Human Diseases;Environmental Information Processing;Environmental Information Processing;Human Diseases;Environmental Information Processing;Human Diseases;Human Diseases;Organismal Systems;Human Diseases;Organismal Systems;Environmental Information Processing;Organismal Systems;Organismal Systems;Organismal Systems;Organismal Systems;Human Diseases;Human Disease…	Neurodegenerative diseases;Environmental adaptation;Infectious diseases;Signal transduction;Signal transduction;Infectious diseases;Signal transduction;Cancers;Infectious diseases;Circulatory system;Endocrine and metabolic diseases;Endocrine system;Signal transduction;Endocrine system;Endocrine system;Endocrine system;Nervous system;Substance dependence;Endocrine and metabolic diseases;Endocrine …	ko05016//Huntington disease;ko04714//Thermogenesis;ko05165//Human papillomavirus infection;ko04024//cAMP signaling pathway;ko04151//PI3K-Akt signaling pathway;ko05166//HTLV-I infection;ko04022//cGMP - PKG signaling pathway;ko05203//Viral carcinogenesis;ko05163//Human cytomegalovirus infection;ko04261//Adrenergic signaling in cardiomyocytes;ko04934//Cushing syndrome;ko04925//Aldosterone synthesis …	K09048;K09048;K09048;K09048;K09048;K09048;K09048;K09048;K09048;K09048;K09048;K09048;K09048;K09048;K09048;K09048;K09048;K09048;K09048;K09048;K09048;K09048;K09048;K09048;K09048;K09048;K09048;K09048;K09048;K09048;K09048;K09048;K09048	-	-	-
MSTRG.37221	64.92	31.567	29.567	Hrb27C	heterogeneous nuclear ribonucleoprotein 27C [Nilaparvata lugens]	Genetic Information Processing	Translation	ko03015//mRNA surveillance pathway	K14411	-	-	-
MSTRG.37572	2.483	0.407	0.453	--	mucin-5AC [Camponotus floridanus]	-	-	-	-	-	-	-
MSTRG.37595	1.963	0.83	1.003	rasgrf2	ras-specific guanine nucleotide-releasing factor 2-like, partial [Nilaparvata lugens]	-	-	-	-	-	-	-
MSTRG.37848	2.09	0.857	0.793	--	optomotor-blind protein-like isoform X4 [Nilaparvata lugens]	-	-	-	-	-	-	-
MSTRG.38209	6.733	2.91	4.107	--	Zinc finger protein 507 [Acromyrmex echinatior]	-	-	-	-	-	-	-
MSTRG.38503	18.217	1.217	1.063	Gld	glucose dehydrogenase [FAD, quinone]-like [Nilaparvata lugens]	-	-	-	-	GO:0043231//intracellular membrane-bounded organelle	GO:0000166//nucleotide binding;GO:0016614//oxidoreductase activity, acting on CH-OH group of donors;GO:0032550//purine ribonucleoside binding	GO:0008202//steroid metabolic process;GO:0033554//cellular response to stress;GO:0044281//small molecule metabolic process;GO:0045168//cell-cell signaling involved in cell fate commitment
MSTRG.3881	5.65	0.117	0.227	--	AGAP004125-PA [Anopheles gambiae str. PEST] [Anopheles gambiae]	-	-	-	-	-	-	-
MSTRG.38817	19.587	7.357	8.143	Itpr	Inositol 1,4,5-trisphosphate receptor [Cryptotermes secundus]	Human Diseases;Human Diseases;Human Diseases;Cellular Processes;Environmental Information Processing;Environmental Information Processing;Human Diseases;Organismal Systems;Environmental Information Processing;Environmental Information Processing;Human Diseases;Human Diseases;Human Diseases;Organismal Systems;Organismal Systems;Organismal Systems;Cellular Processes;Organismal Systems;Organismal Sy…	Neurodegenerative diseases;Neurodegenerative diseases;Infectious diseases;Transport and catabolism;Signal transduction;Signal transduction;Cancers;Endocrine system;Signal transduction;Signal transduction;Infectious diseases;Endocrine and metabolic diseases;Neurodegenerative disease;Digestive system;Circulatory system;Endocrine system;Cell growth and death;Immune system;Nervous system;Infectious d…	ko05010//Alzheimer disease;ko05016//Huntington disease;ko05131//Shigellosis;ko04140//Autophagy - animal;ko04020//Calcium signaling pathway;ko04022//cGMP - PKG signaling pathway;ko05205//Proteoglycans in cancer;ko04921//Oxytocin signaling pathway;ko04371//Apelin signaling pathway;ko04070//Phosphatidylinositol signaling system;ko05163//Human cytomegalovirus infection;ko04934//Cushing syndrome;ko050…	K04958;K04958;K04958;K04958;K04958;K04958;K04958;K04958;K04958;K04958;K04958;K04958;K04958;K04958;K04958;K04958;K04958;K04958;K04958;K04958;K04958;K04958;K04958;K04958;K04958;K04958;K04958;K04958;K04958;K04958;K04958;K04958;K04958;K04958;K04958;K04958;K04958;K04958;K04958;K04958;K04958;K04958;K04958;K04958;K04958;K04958	GO:0005783//endoplasmic reticulum;GO:0030667//secretory granule membrane;GO:0031224//intrinsic component of membrane;GO:0031967//organelle envelope;GO:0043234//protein complex	GO:0005057//receptor signaling protein activity;GO:0005217//intracellular ligand-gated ion channel activity;GO:0005246//calcium channel regulator activity;GO:0005261//cation channel activity;GO:0005543//phospholipid binding;GO:0046873//metal ion transmembrane transporter activity	GO:0001775//cell activation;GO:0002220//innate immune response activating cell surface receptor signaling pathway;GO:0002431//Fc receptor mediated stimulatory signaling pathway;GO:0006816//calcium ion transport;GO:0007599//hemostasis;GO:0010863//positive regulation of phospholipase C activity;GO:0012501//programmed cell death;GO:0015980//energy derivation by oxidation of organic compounds;GO:0034…
MSTRG.39639	93.507	5.86	5.313	--	Chitin binding domain [Trinorchestia longiramus]	-	-	-	-	-	-	-
MSTRG.39677	2.69	0.833	1.153	--	hypothetical protein LSTR_LSTR005631 [Laodelphax striatellus]	-	-	-	-	-	-	-
MSTRG.39804	12.14	5.71	5.553	--	neuroblastoma-amplified sequence-like [Nilaparvata lugens]	Human Diseases;Human Diseases;Organismal Systems;Human Diseases	Neurodegenerative diseases;Cancers;Endocrine system;Infectious diseases	ko05016//Huntington disease;ko05202//Transcriptional misregulation in cancers;ko04919//Thyroid hormone signaling pathway;ko05169//Epstein-Barr virus infection	K11644;K11644;K11644;K11644	-	-	-
MSTRG.39806	14.53	4.87	5	--	paired amphipathic helix protein Sin3a-like isoform X2 [Actinia tenebrosa]	Human Diseases;Human Diseases;Organismal Systems;Human Diseases	Neurodegenerative diseases;Cancers;Endocrine system;Infectious diseases	ko05016//Huntington disease;ko05202//Transcriptional misregulation in cancers;ko04919//Thyroid hormone signaling pathway;ko05169//Epstein-Barr virus infection	K11644;K11644;K11644;K11644	-	-	-
MSTRG.39828	53.317	2.077	2.037	--	hypothetical protein LSTR_LSTR011578 [Laodelphax striatellus]	-	-	-	-	-	-	-
MSTRG.39957	6.607	3.017	2.507	Dek	protein DEK-like [Nilaparvata lugens]	-	-	-	-	-	-	-
MSTRG.4013	0.387	0	0	ECD	protein ecdysoneless [Nilaparvata lugens]	-	-	-	-	-	-	-
MSTRG.4039	3.717	1.803	1.83	--	blastoderm-specific protein 25D isoform X2 [Nilaparvata lugens]	-	-	-	-	-	-	-
MSTRG.4151	3.4	1.403	1.623	rad50	DNA repair protein RAD50 [Nilaparvata lugens]	-	-	-	-	-	-	-
MSTRG.4153	2.453	0.997	0.93	RAD50	DNA repair protein RAD50 [Nilaparvata lugens]	Cellular Processes;Genetic Information Processing;Genetic Information Processing	Cell growth and death;Replication and repair;Replication and repair	ko04218//Cellular senescence;ko03440//Homologous recombination;ko03450//Non-homologous end-joining	K10866;K10866;K10866	-	-	-
MSTRG.4228	2.413	0.84	0.893	--	ribonuclease P protein subunit p29 [Nilaparvata lugens]	-	-	-	-	-	-	-
MSTRG.4286	10.517	4.363	3.63	--	protein msta-like [Nilaparvata lugens]	Metabolism;Metabolism	Global and overview maps;Amino acid metabolism	ko01100//Metabolic pathways;ko00310//Lysine degradation	K11426;K11426	-	-	-
MSTRG.4305	29.347	13.103	13.82	--	cGMP-dependent protein kinase, isozyme 2 forms cD4/T1/T3A/T3B isoform X1 [Zootermopsis nevadensis]	Organismal Systems;Environmental Information Processing;Organismal Systems;Organismal Systems;Organismal Systems;Cellular Processes;Organismal Systems;Organismal Systems;Organismal Systems;Organismal Systems	Environmental adaptation;Signal transduction;Circulatory system;Immune system;Digestive system;Cellular community - eukaryotes;Environmental adaptation;Endocrine system;Sensory system;Nervous system	ko04714//Thermogenesis;ko04022//cGMP - PKG signaling pathway;ko04270//Vascular smooth muscle contraction;ko04611//Platelet activation;ko04970//Salivary secretion;ko04540//Gap junction;ko04713//Circadian entrainment;ko04923//Regulation of lipolysis in adipocyte;ko04740//Olfactory transduction;ko04730//Long-term depression	K07376;K07376;K07376;K07376;K07376;K07376;K07376;K07376;K07376;K07376	-	-	-
MSTRG.4322	1.863	0.447	0.75	--	upstream activation factor subunit spp27-like [Nilaparvata lugens]	-	-	-	-	-	-	-
MSTRG.4356	3.667	1.907	1.76	HSP70B2	heat shock protein 70-1 [Laodelphax striatellus]	Cellular Processes;Genetic Information Processing;Genetic Information Processing;Environmental Information Processing;Organismal Systems;Organismal Systems;Human Diseases;Human Diseases;Organismal Systems;Human Diseases	Transport and catabolism;Folding, sorting and degradation;Transcription;Signal transduction;Endocrine system;Aging;Infectious diseases;Infectious diseases;Immune system;Infectious diseases	ko04144//Endocytosis;ko04141//Protein processing in endoplasmic reticulum;ko03040//Spliceosome;ko04010//MAPK signaling pathway;ko04915//Estrogen signaling pathway;ko04213//Longevity regulating pathway - multiple species;ko05162//Measles;ko05145//Toxoplasmosis;ko04612//Antigen processing and presentation;ko05134//Legionellosis	K03283;K03283;K03283;K03283;K03283;K03283;K03283;K03283;K03283;K03283	-	-	-
MSTRG.4405	3.067	0.167	0.32	--	hypothetical protein LSTR_LSTR014163 [Laodelphax striatellus]	-	-	-	-	-	-	-
MSTRG.4869	20.65	1.153	1.14	--	hypothetical protein LSTR_LSTR005539 [Laodelphax striatellus]	-	-	-	-	-	-	-
MSTRG.4917	4.607	1.407	1.22	--	-	-	-	-	-	-	-	-
MSTRG.4994	97.477	45.893	36.653	Aig1	androgen-dependent TFPI-regulating protein-like [Nilaparvata lugens]	-	-	-	-	-	-	-
MSTRG.5392	8.077	2.937	3.407	--	microtubule-associated protein futsch-like isoform X1 [Nilaparvata lugens]	-	-	-	-	-	-	-
MSTRG.5525	2.17	0.95	1.013	--	PREDICTED: zinc finger protein 197-like isoform X2 [Bemisia tabaci]	-	-	-	-	-	-	-
MSTRG.5700	19.76	11.1	9.45	--	cuticular protein [Nilaparvata lugens]	-	-	-	-	-	-	-
MSTRG.5712	10.36	3.817	3.9	aldA	Aldehyde dehydrogenase family 16 member A1-like Protein [Tribolium castaneum]	Metabolism;Metabolism;Metabolism;Metabolism;Metabolism;Metabolism;Metabolism;Metabolism;Metabolism;Metabolism;Metabolism;Metabolism;Metabolism	Global and overview maps;Amino acid metabolism;Lipid metabolism;Carbohydrate metabolism;Lipid metabolism;Amino acid metabolism;Carbohydrate metabolism;Carbohydrate metabolism;Amino acid metabolism;Metabolism of terpenoids and polyketides;Amino acid metabolism;Metabolism of other amino acids;Amino acid metabolism	ko01100//Metabolic pathways;ko00310//Lysine degradation;ko00561//Glycerolipid metabolism;ko00010//Glycolysis / Gluconeogenesis;ko00071//Fatty acid degradation;ko00330//Arginine and proline metabolism;ko00620//Pyruvate metabolism;ko00053//Ascorbate and aldarate metabolism;ko00280//Valine, leucine and isoleucine degradation;ko00981//Insect hormone biosynthesis;ko00380//Tryptophan metabolism;ko00410…	K00128;K00128;K00128;K00128;K00128;K00128;K00128;K00128;K00128;K00128;K00128;K00128;K00128	-	-	-
MSTRG.5742	1.337	0.34	0.34	--	uncharacterized protein LOC114347285 isoform X3 [Diabrotica virgifera virgifera]	-	-	-	-	-	-	-
MSTRG.6030	76.29	0.113	0.047	APOD	apolipoprotein D-like [Frankliniella occidentalis]	-	-	-	-	-	-	-
MSTRG.613	6.597	2.763	3.197	TSTA3	GDP-L-fucose synthase [Nilaparvata lugens]	Metabolism;Metabolism;Metabolism	Global and overview maps;Carbohydrate metabolism;Carbohydrate metabolism	ko01100//Metabolic pathways;ko00520//Amino sugar and nucleotide sugar metabolism;ko00051//Fructose and mannose metabolism	K02377;K02377;K02377	-	-	-
MSTRG.6295	211.15	110.63	91.607	Ccp84Ab	cuticle protein 8-like [Nilaparvata lugens]	-	-	-	-	-	-	-
MSTRG.631	16.33	1.287	1.317	--	C-type lectin domain family 12 member B-like [Nilaparvata lugens]	-	-	-	-	-	-	-
MSTRG.6360	4.447	2	1.89	drm	protein drumstick isoform X1 [Nilaparvata lugens]	-	-	-	-	-	-	-
MSTRG.686	6.037	2.56	3.397	LYST	PREDICTED: lysosomal-trafficking regulator [Bemisia tabaci]	-	-	-	-	-	-	-
MSTRG.7078	2.773	1.177	0.907	--	uncharacterized protein LOC111049714 [Nilaparvata lugens]	-	-	-	-	-	-	-
MSTRG.7293	1.473	0.707	0.96	--	titin-like [Nilaparvata lugens]	Human Diseases;Human Diseases;Cellular Processes	Cancers;Cancers;Cellular community - eukaryotes	ko05202//Transcriptional misregulation in cancers;ko05206//MicroRNAs in cancer;ko04550//Signaling pathways regulating pluripotency of stem cells	K11459;K11459;K11459	GO:0000152//nuclear ubiquitin ligase complex;GO:0005720//nuclear heterochromatin;GO:0098687//chromosomal region	GO:0044212//transcription regulatory region DNA binding;GO:0046914//transition metal ion binding	GO:0016458//gene silencing;GO:0016568//chromatin modification;GO:0033301//cell cycle comprising mitosis without cytokinesis;GO:0097485//neuron projection guidance
MSTRG.7758	4.737	1.427	1.683	--	Orange domain [Cinara cedri]	-	-	-	-	-	-	-
MSTRG.7798	12.293	4.12	4.803	--	GH18386 [Drosophila grimshawi]	-	-	-	-	-	-	-
MSTRG.7920	13.417	3.023	3.477	UGT2B18	UDP-glucuronosyltransferase 2B18-like [Nilaparvata lugens]	Metabolism;Metabolism;Metabolism;Metabolism;Metabolism;Metabolism;Human Diseases;Metabolism;Metabolism;Metabolism	Global and overview maps;Xenobiotics biodegradation and metabolism;Metabolism of cofactors and vitamins;Carbohydrate metabolism;Carbohydrate metabolism;Metabolism of cofactors and vitamins;Cancers;Xenobiotics biodegradation and metabolism;Xenobiotics biodegradation and metabolism;Lipid metabolism	ko01100//Metabolic pathways;ko00983//Drug metabolism - other enzymes;ko00830//Retinol metabolism;ko00053//Ascorbate and aldarate metabolism;ko00040//Pentose and glucuronate interconversions;ko00860//Porphyrin and chlorophyll metabolism;ko05204//Chemical carcinogenesis;ko00980//Metabolism of xenobiotics by cytochrome P450;ko00982//Drug metabolism - cytochrome P450;ko00140//Steroid hormone biosynth…	K00699;K00699;K00699;K00699;K00699;K00699;K00699;K00699;K00699;K00699	-	GO:0016740//transferase activity	-
MSTRG.803	2.517	1.06	0.797	--	PREDICTED: kinesin-related protein 4 isoform X1 [Crassostrea gigas]	-	-	-	-	-	-	-
MSTRG.8225	30.41	1.137	0.943	--	hypothetical protein LSTR_LSTR008437 [Laodelphax striatellus]	-	-	-	-	-	-	-
MSTRG.8273	7.627	2.69	2.583	GPAA1	glycosylphosphatidylinositol anchor attachment 1 protein-like [Nilaparvata lugens]	Metabolism;Metabolism	Global and overview maps;Glycan biosynthesis and metabolism	ko01100//Metabolic pathways;ko00563//Glycosylphosphatidylinositol(GPI)-anchor biosynthesis	K05289;K05289	GO:0031224//intrinsic component of membrane	GO:0005488//binding	GO:0006464//cellular protein modification process
MSTRG.833	22.633	8.433	8.467	--	fasciclin-3 isoform X1 [Cimex lectularius]	-	-	-	-	-	-	-
MSTRG.8532	5.607	2.503	2.22	--	nucleoporin NDC1 [Nilaparvata lugens]	Genetic Information Processing	Translation	ko03013//RNA transport	K14315	GO:0016020//membrane;GO:0044424//intracellular part	-	GO:0006996//organelle organization
MSTRG.8561	23.94	12.24	11.15	GOLGA7B	golgin subfamily A member 7-like [Nilaparvata lugens]	-	-	-	-	GO:0005794//Golgi apparatus;GO:0044422//organelle part	-	GO:0009987//cellular process;GO:0043170//macromolecule metabolic process
MSTRG.8666	4.413	1.373	1.65	--	PREDICTED: polyamine-modulated factor 1-like [Neodiprion lecontei]	-	-	-	-	-	-	-
MSTRG.8679	25.88	6.993	7.277	--	keratin, type I cytoskeletal 9-like [Nilaparvata lugens]	-	-	-	-	-	-	-
MSTRG.8961	1.657	0.787	0.67	--	TGFb propeptide domain-containing protein [Aphis craccivora]	-	-	-	-	-	-	-
MSTRG.9032	11.59	3.2	3.213	Mcm6	LOW QUALITY PROTEIN: DNA replication licensing factor Mcm6-like [Nilaparvata lugens]	Cellular Processes;Genetic Information Processing	Cell growth and death;Replication and repair	ko04110//Cell cycle;ko03030//DNA replication	K02542;K02542	GO:0031981//nuclear lumen;GO:0036387//pre-replicative complex;GO:0043234//protein complex	GO:0003678//DNA helicase activity;GO:0005515//protein binding;GO:0032550//purine ribonucleoside binding;GO:0043566//structure-specific DNA binding	GO:0006277//DNA amplification;GO:0032508//DNA duplex unwinding;GO:0045168//cell-cell signaling involved in cell fate commitment;GO:1902299//pre-replicative complex assembly involved in cell cycle DNA replication
MSTRG.9097	25.857	11.17	12.543	--	prostate stem cell antigen [Zootermopsis nevadensis]	-	-	-	-	GO:0016020//membrane;GO:0044424//intracellular part	-	GO:0007043//cell-cell junction assembly;GO:0035150//regulation of tube size;GO:0048468//cell development
MSTRG.9150	4.587	1.93	2.217	DDX52	probable ATP-dependent RNA helicase DDX52 [Nilaparvata lugens]	-	-	-	-	GO:0043231//intracellular membrane-bounded organelle;GO:0043232//intracellular non-membrane-bounded organelle	GO:0003723//RNA binding;GO:0003724//RNA helicase activity;GO:0032550//purine ribonucleoside binding;GO:0036459//thiol-dependent ubiquitinyl hydrolase activity	GO:0016072//rRNA metabolic process;GO:0019941//modification-dependent protein catabolic process
MSTRG.9162	3.807	1.643	1.683	--	unkown protein [Riptortus pedestris]	-	-	-	-	-	-	-
MSTRG.9294	2.267	0.987	0.957	--	-	-	-	-	-	-	-	-
MSTRG.935	3.993	1.897	1.537	K02A2.6	Transposon Tf2-6 polyprotein [Araneus ventricosus]	-	-	-	-	-	-	-
MSTRG.9378	19.4	9.72	9.537	C11orf54	ester hydrolase C11orf54 homolog [Nilaparvata lugens]	-	-	-	-	GO:0031988//membrane-bounded vesicle;GO:0043231//intracellular membrane-bounded organelle	GO:0016788//hydrolase activity, acting on ester bonds;GO:0046914//transition metal ion binding	-
MSTRG.9846	7.557	2.703	2.71	Gyc76C	guanylate cyclase 32E-like isoform X1 [Melanaphis sacchari]	Metabolism;Metabolism	Global and overview maps;Nucleotide metabolism	ko01100//Metabolic pathways;ko00230//Purine metabolism	K01769;K01769	-	-	-
Sfur000012	29.503	15.767	13.143	SNRPG	Probable small nuclear ribonucleoprotein G	Genetic Information Processing	Transcription	ko03040//Spliceosome	K11099	GO:0005634//nucleus;GO:0005681//spliceosomal complex;GO:0005682//U5 snRNP;GO:0005685//U1 snRNP;GO:0005686//U2 snRNP;GO:0005687//U4 snRNP;GO:0005689//U12-type spliceosomal complex;GO:0005829//cytosol;GO:0030532//small nuclear ribonucleoprotein complex;GO:0034719//SMN-Sm protein complex;GO:0043186//P granule;GO:0071004//U2-type prespliceosome;GO:0071011//precatalytic spliceosome;GO:0071013//catalyt…	GO:0003723//RNA binding	GO:0000387//spliceosomal snRNP assembly;GO:0000398//mRNA splicing, via spliceosome
Sfur000025	2.007	0.693	0.987	--	Putative uncharacterized protein	Genetic Information Processing	Translation	ko03013//RNA transport	K14288	-	-	-
Sfur000038	3.543	1.347	1.543	BUB1	Mitotic checkpoint serine/threonine-protein kinase BUB1	Cellular Processes;Cellular Processes;Organismal Systems	Cell growth and death;Cell growth and death;Endocrine system	ko04110//Cell cycle;ko04114//Oocyte meiosis;ko04914//Progesterone-mediated oocyte maturation	K02178;K02178;K02178	GO:0000775//chromosome, centromeric region;GO:0000776//kinetochore;GO:0000777//condensed chromosome kinetochore;GO:0000778//condensed nuclear chromosome kinetochore;GO:0000780//condensed nuclear chromosome, centromeric region;GO:0000942//condensed nuclear chromosome outer kinetochore;GO:0005654//nucleoplasm;GO:0005829//cytosol	GO:0004672//protein kinase activity;GO:0004674//protein serine/threonine kinase activity;GO:0005524//ATP binding	GO:0006915//apoptotic process;GO:0007059//chromosome segregation;GO:0007063//regulation of sister chromatid cohesion;GO:0007094//mitotic spindle assembly checkpoint;GO:0051301//cell division;GO:0051754//meiotic sister chromatid cohesion, centromeric;GO:0051983//regulation of chromosome segregation;GO:2001244//positive regulation of intrinsic apoptotic signaling pathway
Sfur000060	5.01	2.033	2.633	--	Putative uncharacterized protein	-	-	-	-	-	-	-
Sfur000067	3.72	1.867	1.69	Parp	Poly [ADP-ribose] polymerase	Organismal Systems;Cellular Processes;Cellular Processes;Cellular Processes;Genetic Information Processing;Environmental Information Processing	Aging;Cell growth and death;Cell growth and death;Cell growth and death;Replication and repair;Signal transduction	ko04212//Longevity regulating pathway - worm;ko04210//Apoptosis;ko04214//Apoptosis - fly;ko04217//Necroptosis;ko03410//Base excision repair;ko04064//NF-kappa B signaling pathway	K24070;K24070;K24070;K24070;K24070;K24070	GO:0005634//nucleus	GO:0003677//DNA binding;GO:0003950//NAD+ ADP-ribosyltransferase activity;GO:0008270//zinc ion binding;GO:0051287//NAD binding	GO:0006471//protein ADP-ribosylation
Sfur000068	4.613	2.12	2.443	--	Putative uncharacterized protein	-	-	-	-	-	-	-
Sfur000070	3.173	0.85	0.837	pola1	DNA polymerase alpha catalytic subunit	Genetic Information Processing	Replication and repair	ko03030//DNA replication	K02320	GO:0005634//nucleus;GO:0005635//nuclear envelope;GO:0005654//nucleoplasm;GO:0005658//alpha DNA polymerase:primase complex;GO:0005730//nucleolus;GO:0016363//nuclear matrix	GO:0000166//nucleotide binding;GO:0003677//DNA binding;GO:0003682//chromatin binding;GO:0003887//DNA-directed DNA polymerase activity;GO:0046872//metal ion binding;GO:0051539//4 iron, 4 sulfur cluster binding	GO:0006260//DNA replication;GO:0006269//DNA replication, synthesis of RNA primer;GO:0006270//DNA replication initiation;GO:0006271//DNA strand elongation involved in DNA replication;GO:0006272//leading strand elongation;GO:0006273//lagging strand elongation;GO:0006303//double-strand break repair via nonhomologous end joining
Sfur000071	2.117	0.56	0.587	Mcm7	DNA replication licensing factor Mcm7	Cellular Processes;Genetic Information Processing	Cell growth and death;Replication and repair	ko04110//Cell cycle;ko03030//DNA replication	K02210;K02210	GO:0005634//nucleus;GO:0042555//MCM complex;GO:0071162//CMG complex	GO:0003678//DNA helicase activity;GO:0003688//DNA replication origin binding;GO:0003697//single-stranded DNA binding;GO:0005524//ATP binding	GO:0000727//double-strand break repair via break-induced replication;GO:0006267//pre-replicative complex assembly involved in nuclear cell cycle DNA replication;GO:0006268//DNA unwinding involved in DNA replication;GO:0006270//DNA replication initiation;GO:0006271//DNA strand elongation involved in DNA replication
Sfur000079	5.917	2.487	2.687	RRAGA	Ras-related GTP-binding protein A	Human Diseases;Cellular Processes;Environmental Information Processing	Infectious diseases;Transport and catabolism;Signal transduction	ko05131//Shigellosis;ko04140//Autophagy - animal;ko04150//mTOR signaling pathway	K16185;K16185;K16185	GO:0005634//nucleus;GO:0005764//lysosome;GO:0034448//EGO complex;GO:1990131//Gtr1-Gtr2 GTPase complex	GO:0003924//GTPase activity;GO:0005525//GTP binding	GO:0006915//apoptotic process;GO:0009267//cellular response to starvation;GO:0010506//regulation of autophagy;GO:0010507//negative regulation of autophagy;GO:0032008//positive regulation of TOR signaling;GO:0034198//cellular response to amino acid starvation;GO:0034613//cellular protein localization;GO:0043200//response to amino acid;GO:0071230//cellular response to amino acid stimulus;GO:1903432…
Sfur000082	7.147	2.29	2.673	stan	Protocadherin-like wing polarity protein stan	-	-	-	-	GO:0005886//plasma membrane;GO:0005911//cell-cell junction;GO:0016021//integral component of membrane;GO:0016324//apical plasma membrane	GO:0004888//transmembrane signaling receptor activity;GO:0004930//G-protein coupled receptor activity;GO:0005509//calcium ion binding;GO:0050839//cell adhesion molecule binding	GO:0001736//establishment of planar polarity;GO:0001737//establishment of imaginal disc-derived wing hair orientation;GO:0001738//morphogenesis of a polarized epithelium;GO:0007156//homophilic cell adhesion via plasma membrane adhesion molecules;GO:0007367//segment polarity determination;GO:0007409//axonogenesis;GO:0007411//axon guidance;GO:0016318//ommatidial rotation;GO:0016319//mushroom body d…
Sfur000095	7.97	3.797	4.127	polo	Serine/threonine-protein kinase polo	Cellular Processes;Cellular Processes;Environmental Information Processing;Organismal Systems	Cell growth and death;Cell growth and death;Signal transduction;Endocrine system	ko04110//Cell cycle;ko04114//Oocyte meiosis;ko04068//FoxO signaling pathway;ko04914//Progesterone-mediated oocyte maturation	K06631;K06631;K06631;K06631	GO:0000776//kinetochore;GO:0000922//spindle pole;GO:0000940//condensed chromosome outer kinetochore;GO:0005634//nucleus;GO:0005635//nuclear envelope;GO:0005737//cytoplasm;GO:0005813//centrosome;GO:0005814//centriole;GO:0005819//spindle;GO:0005828//kinetochore microtubule;GO:0005874//microtubule;GO:0030496//midbody;GO:1990023//mitotic spindle midzone	GO:0004672//protein kinase activity;GO:0004674//protein serine/threonine kinase activity;GO:0005524//ATP binding	GO:0000278//mitotic cell cycle;GO:0000915//actomyosin contractile ring assembly;GO:0006468//protein phosphorylation;GO:0007058//spindle assembly involved in female meiosis II;GO:0007098//centrosome cycle;GO:0007112//male meiosis cytokinesis;GO:0007140//male meiosis;GO:0007143//female meiotic division;GO:0007147//female meiosis II;GO:0007344//pronuclear fusion;GO:0007406//negative regulation of ne…
Sfur000100	20.363	0.81	0.56	CYP4C1	Cytochrome P450 4C1	-	-	-	-	GO:0005789//endoplasmic reticulum membrane	GO:0005506//iron ion binding;GO:0020037//heme binding;GO:0070330//aromatase activity	-
Sfur000103	0.553	0.183	0.137	--	Putative uncharacterized protein	-	-	-	-	-	-	-
Sfur000109	1.493	0.507	0.453	ddx11	ATP-dependent DNA helicase DDX11	-	-	-	-	GO:0000922//spindle pole;GO:0005634//nucleus;GO:0005730//nucleolus;GO:0005737//cytoplasm;GO:0005815//microtubule organizing center;GO:0030496//midbody	GO:0003677//DNA binding;GO:0003678//DNA helicase activity;GO:0003723//RNA binding;GO:0005524//ATP binding;GO:0046872//metal ion binding;GO:0051539//4 iron, 4 sulfur cluster binding	GO:0006260//DNA replication;GO:0006281//DNA repair;GO:0007275//multicellular organism development;GO:0009303//rRNA transcription;GO:0032508//DNA duplex unwinding;GO:0034085//establishment of sister chromatid cohesion;GO:1901836//regulation of transcription of nuclear large rRNA transcript from RNA polymerase I promoter;GO:1990700//nucleolar chromatin organization
Sfur000112	12.053	3.847	4.11	ZMYND8	Protein kinase C-binding protein 1	-	-	-	-	GO:0005634//nucleus;GO:0005654//nucleoplasm;GO:0005737//cytoplasm;GO:0005794//Golgi apparatus;GO:0043197//dendritic spine;GO:0043198//dendritic shaft	GO:0003714//transcription corepressor activity;GO:0008270//zinc ion binding;GO:0019904//protein domain specific binding;GO:0035064//methylated histone binding;GO:0047485//protein N-terminus binding;GO:0070491//repressing transcription factor binding;GO:0070577//lysine-acetylated histone binding	GO:0006355//regulation of transcription, DNA-templated;GO:0030336//negative regulation of cell migration;GO:0051491//positive regulation of filopodium assembly;GO:0060999//positive regulation of dendritic spine development;GO:0098815//modulation of excitatory postsynaptic potential;GO:1902897//regulation of postsynaptic density protein 95 clustering;GO:1902952//positive regulation of dendritic sp…
Sfur000115	4.717	1.597	1.45	--	Putative uncharacterized protein	-	-	-	-	-	-	-
Sfur000145	5.203	1.35	1.44	Mcm7	DNA replication licensing factor Mcm7	Cellular Processes;Genetic Information Processing	Cell growth and death;Replication and repair	ko04110//Cell cycle;ko03030//DNA replication	K02210;K02210	GO:0005634//nucleus;GO:0042555//MCM complex;GO:0071162//CMG complex	GO:0003678//DNA helicase activity;GO:0003688//DNA replication origin binding;GO:0003697//single-stranded DNA binding;GO:0005524//ATP binding	GO:0000727//double-strand break repair via break-induced replication;GO:0006267//pre-replicative complex assembly involved in nuclear cell cycle DNA replication;GO:0006268//DNA unwinding involved in DNA replication;GO:0006270//DNA replication initiation;GO:0006271//DNA strand elongation involved in DNA replication
Sfur000151	99.077	16.797	18.14	--	Protein takeout	-	-	-	-	GO:0005576//extracellular region;GO:0005615//extracellular space	-	GO:0007617//mating behavior;GO:0007622//rhythmic behavior;GO:0007623//circadian rhythm;GO:0007631//feeding behavior;GO:0008049//male courtship behavior;GO:0008343//adult feeding behavior;GO:0042594//response to starvation;GO:0042595//behavioral response to starvation
Sfur000165	26.177	13.903	11.047	CG14621	Solute carrier family 35 member E1 homolog	-	-	-	-	GO:0005794//Golgi apparatus;GO:0016021//integral component of membrane	GO:0015297//antiporter activity;GO:0022857//transmembrane transporter activity	-
Sfur000166	24.397	2.727	2.437	--	Protein takeout	-	-	-	-	GO:0005576//extracellular region;GO:0005615//extracellular space	-	GO:0007617//mating behavior;GO:0007622//rhythmic behavior;GO:0007623//circadian rhythm;GO:0007631//feeding behavior;GO:0008049//male courtship behavior;GO:0008343//adult feeding behavior;GO:0042594//response to starvation;GO:0042595//behavioral response to starvation
Sfur000171	0.837	0.353	0.477	--	Protein MMS22-like	-	-	-	-	GO:0043596//nuclear replication fork	-	GO:0000724//double-strand break repair via homologous recombination;GO:0031297//replication fork processing
Sfur000184	2.917	1.103	1.653	--	Putative uncharacterized protein	-	-	-	-	-	-	-
Sfur000186	51.61	10.46	9.737	--	Protein takeout	-	-	-	-	GO:0005576//extracellular region;GO:0005615//extracellular space	-	GO:0007617//mating behavior;GO:0007622//rhythmic behavior;GO:0007623//circadian rhythm;GO:0007631//feeding behavior;GO:0008049//male courtship behavior;GO:0008343//adult feeding behavior;GO:0042594//response to starvation;GO:0042595//behavioral response to starvation
Sfur000193	7.217	0.37	0.297	Pnliprp2	Pancreatic lipase-related protein 2	Metabolism;Organismal Systems;Metabolism;Organismal Systems;Organismal Systems	Global and overview maps;Digestive system;Lipid metabolism;Digestive system;Digestive system	ko01100//Metabolic pathways;ko04972//Pancreatic secretion;ko00561//Glycerolipid metabolism;ko04977//Vitamin digestion and absorption;ko04975//Fat digestion and absorption	K14073;K14073;K14073;K14073;K14073	GO:0005615//extracellular space;GO:0042589//zymogen granule membrane	GO:0004620//phospholipase activity;GO:0004806//triglyceride lipase activity;GO:0005509//calcium ion binding;GO:0016298//lipase activity;GO:0047372//acylglycerol lipase activity;GO:0047714//galactolipase activity	GO:0006968//cellular defense response;GO:0009395//phospholipid catabolic process;GO:0009617//response to bacterium;GO:0009791//post-embryonic development;GO:0016042//lipid catabolic process;GO:0019376//galactolipid catabolic process;GO:0019433//triglyceride catabolic process;GO:0032094//response to food;GO:0033993//response to lipid;GO:0034638//phosphatidylcholine catabolic process;GO:0043434//re…
Sfur000207	33.023	8.407	6.4	HMGCS1	Hydroxymethylglutaryl-CoA synthase, cytoplasmic	Metabolism;Organismal Systems;Metabolism;Metabolism;Metabolism;Metabolism	Global and overview maps;Endocrine system;Amino acid metabolism;Metabolism of terpenoids and polyketides;Carbohydrate metabolism;Lipid metabolism	ko01100//Metabolic pathways;ko03320//PPAR signaling pathway;ko00280//Valine, leucine and isoleucine degradation;ko00900//Terpenoid backbone biosynthesis;ko00650//Butanoate metabolism;ko00072//Synthesis and degradation of ketone bodies	K01641;K01641;K01641;K01641;K01641;K01641	GO:0005737//cytoplasm	GO:0004421//hydroxymethylglutaryl-CoA synthase activity;GO:0042803//protein homodimerization activity	GO:0006695//cholesterol biosynthetic process;GO:0008299//isoprenoid biosynthetic process
Sfur000209	33.937	13.357	11.807	Uggt	UDP-glucose:glycoprotein glucosyltransferase	Genetic Information Processing	Folding, sorting and degradation	ko04141//Protein processing in endoplasmic reticulum	K11718	GO:0005635//nuclear envelope;GO:0005737//cytoplasm;GO:0005783//endoplasmic reticulum;GO:0005788//endoplasmic reticulum lumen;GO:0005791//rough endoplasmic reticulum;GO:0005793//endoplasmic reticulum-Golgi intermediate compartment;GO:0012505//endomembrane system	GO:0003980//UDP-glucose:glycoprotein glucosyltransferase activity;GO:0051082//unfolded protein binding	GO:0006486//protein glycosylation;GO:0018279//protein N-linked glycosylation via asparagine;GO:0071712//ER-associated misfolded protein catabolic process
Sfur000219	50.433	12.237	13.483	FLNA	Filamin-C	Human Diseases;Cellular Processes;Human Diseases;Environmental Information Processing	Infectious diseases;Cellular community - eukaryotes;Cancers;Signal transduction	ko05132//Salmonella infection;ko04510//Focal adhesion;ko05205//Proteoglycans in cancer;ko04010//MAPK signaling pathway	K04437;K04437;K04437;K04437	GO:0005737//cytoplasm;GO:0005829//cytosol;GO:0005886//plasma membrane;GO:0015629//actin cytoskeleton;GO:0016528//sarcoplasm;GO:0030018//Z disc;GO:0042383//sarcolemma	GO:0003779//actin binding;GO:0008092//cytoskeletal protein binding;GO:0030506//ankyrin binding;GO:0042802//identical protein binding	GO:0030029//actin filament-based process;GO:0048747//muscle fiber development
Sfur000224	2.137	0.8	0.697	NLGN4Y	Neuroligin-4, Y-linked	Environmental Information Processing	Signaling molecules and interaction	ko04514//Cell adhesion molecules (CAMs)	K07378	GO:0005886//plasma membrane;GO:0005887//integral component of plasma membrane;GO:0009986//cell surface;GO:0045202//synapse;GO:0089717//spanning component of membrane;GO:0098793//presynapse;GO:0098839//postsynaptic density membrane	GO:0038023//signaling receptor activity;GO:0042043//neurexin family protein binding;GO:0050839//cell adhesion molecule binding;GO:0097110//scaffold protein binding	GO:0007158//neuron cell-cell adhesion;GO:0007268//synaptic transmission;GO:0007612//learning;GO:0035176//social behavior;GO:0048488//synaptic vesicle endocytosis;GO:0050804//modulation of synaptic transmission;GO:0071625//vocalization behavior;GO:0097104//postsynaptic membrane assembly;GO:0097105//presynaptic membrane assembly
Sfur000236	1.007	0.19	0.133	--	Putative uncharacterized protein	-	-	-	-	-	-	-
Sfur000238	3.537	1.727	1.647	CHERP	Calcium homeostasis endoplasmic reticulum protein	Genetic Information Processing	Transcription	ko03040//Spliceosome	K12841	GO:0005654//nucleoplasm;GO:0005737//cytoplasm;GO:0016020//membrane;GO:0033017//sarcoplasmic reticulum membrane;GO:0048471//perinuclear region of cytoplasm	GO:0003723//RNA binding;GO:0044325//ion channel binding	GO:0000398//mRNA splicing, via spliceosome;GO:0006874//cellular calcium ion homeostasis;GO:0007399//nervous system development;GO:0008285//negative regulation of cell proliferation;GO:0051209//release of sequestered calcium ion into cytosol;GO:0070886//positive regulation of calcineurin-NFAT signaling cascade
Sfur000243	8.563	3.577	3.537	Tbl1x	F-box-like/WD repeat-containing protein TBL1XR1	Environmental Information Processing;Environmental Information Processing	Signal transduction;Signal transduction	ko04310//Wnt signaling pathway;ko04013//MAPK signaling pathway - fly	K04508;K04508	GO:0000118//histone deacetylase complex;GO:0005634//nucleus;GO:0005654//nucleoplasm;GO:0017053//transcriptional repressor complex;GO:0072686//mitotic spindle	GO:0000976//transcription regulatory region sequence-specific DNA binding;GO:0003677//DNA binding;GO:0003714//transcription corepressor activity;GO:0008013//beta-catenin binding;GO:0042393//histone binding;GO:0047485//protein N-terminus binding	GO:0000122//negative regulation of transcription from RNA polymerase II promoter;GO:0001835//blastocyst hatching;GO:0002021//response to dietary excess;GO:0006357//regulation of transcription from RNA polymerase II promoter;GO:0010468//regulation of gene expression;GO:0016042//lipid catabolic process;GO:0016575//histone deacetylation;GO:0035264//multicellular organism growth;GO:0043161//proteasom…
Sfur000262	6.893	2.053	2.263	Nnt	NAD(P) transhydrogenase, mitochondrial	Metabolism;Metabolism	Global and overview maps;Metabolism of cofactors and vitamins	ko01100//Metabolic pathways;ko00760//Nicotinate and nicotinamide metabolism	K00323;K00323	GO:0005739//mitochondrion;GO:0005743//mitochondrial inner membrane;GO:0016021//integral component of membrane	GO:0008746//NAD(P)+ transhydrogenase activity;GO:0050661//NADP binding;GO:0051287//NAD binding	GO:0006740//NADPH regeneration;GO:0072593//reactive oxygen species metabolic process;GO:1902600//hydrogen ion transmembrane transport
Sfur000268	10.943	3.84	4.303	AAEL008004	Elongation of very long chain fatty acids protein AAEL008004	Metabolism;Metabolism;Metabolism;Metabolism	Global and overview maps;Global and overview maps;Lipid metabolism;Lipid metabolism	ko01100//Metabolic pathways;ko01212//Fatty acid metabolism;ko01040//Biosynthesis of unsaturated fatty acids;ko00062//Fatty acid elongation	K10250;K10250;K10250;K10250	GO:0030176//integral component of endoplasmic reticulum membrane	-	GO:0006633//fatty acid biosynthetic process
Sfur000269	572.187	178.313	174.413	alphaTub84B	Tubulin alpha-1 chain	Human Diseases;Human Diseases;Cellular Processes;Cellular Processes;Human Diseases;Cellular Processes;Cellular Processes	Neurodegenerative diseases;Neurodegenerative diseases;Transport and catabolism;Cellular community - eukaryotes;Infectious diseases;Cellular community - eukaryotes;Cell growth and death	ko05010//Alzheimer disease;ko05016//Huntington disease;ko04145//Phagosome;ko04530//Tight junction;ko05130//Pathogenic Escherichia coli infection;ko04540//Gap junction;ko04210//Apoptosis	K07374;K07374;K07374;K07374;K07374;K07374;K07374	GO:0000235//astral microtubule;GO:0005634//nucleus;GO:0005737//cytoplasm;GO:0005813//centrosome;GO:0005819//spindle;GO:0005874//microtubule;GO:0048471//perinuclear region of cytoplasm	GO:0003924//GTPase activity;GO:0005200//structural constituent of cytoskeleton;GO:0005525//GTP binding	GO:0000226//microtubule cytoskeleton organization;GO:0000278//mitotic cell cycle;GO:0007017//microtubule-based process;GO:0032418//lysosome localization
Sfur000272	28.043	16.063	13.793	hs6st1b	Heparan-sulfate 6-O-sulfotransferase 1	Metabolism	Glycan biosynthesis and metabolism	ko00534//Glycosaminoglycan biosynthesis - heparan sulfate / heparin	K02514	GO:0000139//Golgi membrane;GO:0005654//nucleoplasm;GO:0005887//integral component of plasma membrane;GO:0016607//nuclear speck	GO:0008146//sulfotransferase activity;GO:0017095//heparan sulfate 6-O-sulfotransferase activity	GO:0001525//angiogenesis;GO:0006024//glycosaminoglycan biosynthetic process;GO:0015015//heparan sulfate proteoglycan biosynthetic process, enzymatic modification;GO:0048286//lung alveolus development;GO:0048666//neuron development;GO:0060716//labyrinthine layer blood vessel development
Sfur000280	16.803	6.26	9.497	cwo	Transcription factor cwo	Human Diseases;Human Diseases;Human Diseases;Environmental Information Processing	Cancers;Infectious diseases;Cancers;Signal transduction	ko05200//Pathways in cancer;ko05165//Human papillomavirus infection;ko05224//Breast cancer;ko04330//Notch signaling pathway	K09091;K09091;K09091;K09091	GO:0005634//nucleus;GO:0005654//nucleoplasm	GO:0000978//RNA polymerase II core promoter proximal region sequence-specific DNA binding;GO:0000981//RNA polymerase II transcription factor activity, sequence-specific DNA binding;GO:0003700//transcription factor activity, sequence-specific DNA binding;GO:0046983//protein dimerization activity	GO:0000122//negative regulation of transcription from RNA polymerase II promoter;GO:0006355//regulation of transcription, DNA-templated;GO:0006357//regulation of transcription from RNA polymerase II promoter;GO:0007623//circadian rhythm;GO:0009952//anterior/posterior pattern specification;GO:0032922//circadian regulation of gene expression;GO:0042752//regulation of circadian rhythm;GO:0048813//de…
Sfur000284	9.197	3.907	3.693	--	Putative uncharacterized protein	-	-	-	-	-	-	-
Sfur000286	0.863	0.177	0.143	Cyp4ac1	Cytochrome P450 4c3	-	-	-	-	GO:0005789//endoplasmic reticulum membrane	GO:0004497//monooxygenase activity;GO:0005506//iron ion binding;GO:0016705//oxidoreductase activity, acting on paired donors, with incorporation or reduction of molecular oxygen;GO:0020037//heme binding	-
Sfur000297	12	5.213	4.897	AGAP006244	Choline transporter-like 1	Human Diseases	Cancers	ko05231//Choline metabolism in cancer	K06515	GO:0016020//membrane;GO:0016021//integral component of membrane	GO:0022857//transmembrane transporter activity	GO:0055085//transmembrane transport
Sfur000300	14.517	6.817	7.76	Gmer	Probable GDP-L-fucose synthase	Metabolism;Metabolism;Metabolism	Global and overview maps;Carbohydrate metabolism;Carbohydrate metabolism	ko01100//Metabolic pathways;ko00520//Amino sugar and nucleotide sugar metabolism;ko00051//Fructose and mannose metabolism	K02377;K02377;K02377	-	GO:0047918//GDP-mannose 3,5-epimerase activity;GO:0050577//GDP-L-fucose synthase activity	GO:0033227//dsRNA transport;GO:0042350//GDP-L-fucose biosynthetic process;GO:0042351//'de novo' GDP-L-fucose biosynthetic process
Sfur000301	13.337	3.367	3.397	AAEL008004	Elongation of very long chain fatty acids protein AAEL008004	Metabolism;Metabolism;Metabolism;Metabolism	Global and overview maps;Global and overview maps;Lipid metabolism;Lipid metabolism	ko01100//Metabolic pathways;ko01212//Fatty acid metabolism;ko01040//Biosynthesis of unsaturated fatty acids;ko00062//Fatty acid elongation	K10250;K10250;K10250;K10250	GO:0030176//integral component of endoplasmic reticulum membrane	-	GO:0006633//fatty acid biosynthetic process
Sfur000302	17.867	7.333	6.517	Hsp90b1	Endoplasmin	Human Diseases;Environmental Information Processing;Human Diseases;Genetic Information Processing;Organismal Systems;Human Diseases;Organismal Systems;Human Diseases;Organismal Systems	Cancers;Signal transduction;Infectious diseases;Folding, sorting and degradation;Endocrine system;Cardiovascular diseases;Endocrine system;Cancers;Immune system	ko05200//Pathways in cancer;ko04151//PI3K-Akt signaling pathway;ko05132//Salmonella infection;ko04141//Protein processing in endoplasmic reticulum;ko04915//Estrogen signaling pathway;ko05418//Fluid shear stress and atherosclerosis;ko04918//Thyroid hormone synthesis;ko05215//Prostate cancer;ko04657//IL-17 signaling pathway	K09487;K09487;K09487;K09487;K09487;K09487;K09487;K09487;K09487	GO:0005783//endoplasmic reticulum;GO:0005788//endoplasmic reticulum lumen;GO:0005789//endoplasmic reticulum membrane;GO:0005790//smooth endoplasmic reticulum;GO:0005829//cytosol;GO:0005886//plasma membrane;GO:0030496//midbody;GO:0032991//macromolecular complex;GO:0033018//sarcoplasmic reticulum lumen;GO:0034663//endoplasmic reticulum chaperone complex;GO:0042470//melanosome;GO:0048471//perinuclea…	GO:0003723//RNA binding;GO:0005524//ATP binding;GO:0019903//protein phosphatase binding;GO:0050750//low-density lipoprotein particle receptor binding;GO:0051082//unfolded protein binding	GO:0001666//response to hypoxia;GO:0006457//protein folding;GO:0030433//ER-associated ubiquitin-dependent protein catabolic process;GO:0030970//retrograde protein transport, ER to cytosol;GO:0031247//actin rod assembly;GO:0043066//negative regulation of apoptotic process;GO:0043666//regulation of phosphoprotein phosphatase activity;GO:0071287//cellular response to manganese ion;GO:0071318//cellul…
Sfur000315	22.06	10.917	11.277	Acy1	Aminoacylase-1	Metabolism;Metabolism;Metabolism;Metabolism	Global and overview maps;Global and overview maps;Global and overview maps;Amino acid metabolism	ko01100//Metabolic pathways;ko01230//Biosynthesis of amino acids;ko01210//2-Oxocarboxylic acid metabolism;ko00220//Arginine biosynthesis	K14677;K14677;K14677;K14677	GO:0005737//cytoplasm;GO:0070062//extracellular exosome	GO:0004046//aminoacylase activity;GO:0042802//identical protein binding;GO:0046872//metal ion binding	GO:0006520//cellular amino acid metabolic process
Sfur000321	2.047	1.017	1.36	Gtf3c1	General transcription factor 3C polypeptide 1	-	-	-	-	GO:0000127//transcription factor TFIIIC complex;GO:0005654//nucleoplasm;GO:0005730//nucleolus;GO:1990904//ribonucleoprotein complex	GO:0003677//DNA binding	GO:0006384//transcription initiation from RNA polymerase III promoter;GO:0042791//5S class rRNA transcription from RNA polymerase III type 1 promoter
Sfur000323	1.953	0.47	0.36	CYP4C1	Cytochrome P450 4C1	-	-	-	-	GO:0005789//endoplasmic reticulum membrane	GO:0005506//iron ion binding;GO:0020037//heme binding;GO:0070330//aromatase activity	-
Sfur000330	1340.12	358.977	495.57	D11DS	Acyl-CoA Delta(11) desaturase	Metabolism;Organismal Systems;Environmental Information Processing;Metabolism;Organismal Systems;Metabolism	Global and overview maps;Aging;Signal transduction;Global and overview maps;Endocrine system;Lipid metabolism	ko01100//Metabolic pathways;ko04212//Longevity regulating pathway - worm;ko04152//AMPK signaling pathway;ko01212//Fatty acid metabolism;ko03320//PPAR signaling pathway;ko01040//Biosynthesis of unsaturated fatty acids	K00507;K00507;K00507;K00507;K00507;K00507	GO:0016021//integral component of membrane	GO:0017105//acyl-CoA delta11-desaturase activity;GO:0046872//metal ion binding;GO:0050601//myristoyl-CoA 11-(Z) desaturase activity	GO:0006631//fatty acid metabolic process;GO:0006633//fatty acid biosynthetic process;GO:0042811//pheromone biosynthetic process;GO:0055114//oxidation-reduction process
Sfur000336	10.603	4.327	3.82	slc20a1-a	Sodium-dependent phosphate transporter 1-A	-	-	-	-	GO:0005887//integral component of plasma membrane	GO:0005315//inorganic phosphate transmembrane transporter activity;GO:0015293//symporter activity	GO:0035435//phosphate ion transmembrane transport
Sfur000337	12.86	1.593	1.43	AAEL008004	Elongation of very long chain fatty acids protein AAEL008004	Metabolism;Metabolism;Metabolism;Metabolism	Global and overview maps;Global and overview maps;Lipid metabolism;Lipid metabolism	ko01100//Metabolic pathways;ko01212//Fatty acid metabolism;ko01040//Biosynthesis of unsaturated fatty acids;ko00062//Fatty acid elongation	K10250;K10250;K10250;K10250	GO:0030176//integral component of endoplasmic reticulum membrane	-	GO:0006633//fatty acid biosynthetic process
Sfur000338	9.837	0.273	0.213	ich	Ichor	-	-	-	-	GO:0005634//nucleus	GO:0000978//RNA polymerase II core promoter proximal region sequence-specific DNA binding;GO:0001228//transcriptional activator activity, RNA polymerase II transcription regulatory region sequence-specific binding;GO:0046872//metal ion binding	GO:0000122//negative regulation of transcription from RNA polymerase II promoter;GO:0006357//regulation of transcription from RNA polymerase II promoter;GO:0010628//positive regulation of gene expression;GO:0035149//lumen formation, open tracheal system;GO:0045944//positive regulation of transcription from RNA polymerase II promoter;GO:0060439//trachea morphogenesis;GO:1901148//gene expression in…
Sfur000343	21.777	9.133	8.027	Alg9	Alpha-1,2-mannosyltransferase ALG9	Metabolism;Metabolism;Metabolism	Global and overview maps;Glycan biosynthesis and metabolism;Glycan biosynthesis and metabolism	ko01100//Metabolic pathways;ko00513//Various types of N-glycan biosynthesis;ko00510//N-Glycan biosynthesis	K03846;K03846;K03846	GO:0005783//endoplasmic reticulum;GO:0005789//endoplasmic reticulum membrane;GO:0016021//integral component of membrane	GO:0000026//alpha-1,2-mannosyltransferase activity;GO:0000030//mannosyltransferase activity;GO:0052918//dol-P-Man:Man(8)GlcNAc(2)-PP-Dol alpha-1,2-mannosyltransferase activity;GO:0052926//dol-P-Man:Man(6)GlcNAc(2)-PP-Dol alpha-1,2-mannosyltransferase activity	GO:0006487//protein N-linked glycosylation
Sfur000347	11.43	3.463	3.573	NNT	NAD(P) transhydrogenase, mitochondrial	Metabolism;Metabolism	Global and overview maps;Metabolism of cofactors and vitamins	ko01100//Metabolic pathways;ko00760//Nicotinate and nicotinamide metabolism	K00323;K00323	GO:0005739//mitochondrion;GO:0005743//mitochondrial inner membrane;GO:0016021//integral component of membrane	GO:0008746//NAD(P)+ transhydrogenase activity;GO:0050661//NADP binding;GO:0051287//NAD binding	GO:0006740//NADPH regeneration;GO:0072593//reactive oxygen species metabolic process;GO:1902600//hydrogen ion transmembrane transport
Sfur000350	1.137	0.347	0.243	--	Putative uncharacterized protein	-	-	-	-	-	-	-
Sfur000352	39.87	14.453	11.913	--	Protein takeout	Genetic Information Processing;Human Diseases;Genetic Information Processing	Translation;Infectious diseases;Translation	ko03013//RNA transport;ko05166//HTLV-I infection;ko03008//Ribosome biogenesis in eukaryotes	K07936;K07936;K07936	GO:0005576//extracellular region;GO:0005615//extracellular space	-	GO:0007617//mating behavior;GO:0007622//rhythmic behavior;GO:0007623//circadian rhythm;GO:0007631//feeding behavior;GO:0008049//male courtship behavior;GO:0008343//adult feeding behavior;GO:0042594//response to starvation;GO:0042595//behavioral response to starvation
Sfur000360	4.993	2.487	2.723	--	Protein ALP1-like	Human Diseases	Infectious diseases	ko05168//Herpes simplex infection	K09228	GO:0005634//nucleus	GO:0004518//nuclease activity;GO:0046872//metal ion binding	-
Sfur000371	2.097	0.833	0.803	Foxn1	Forkhead box protein N1	-	-	-	-	GO:0005634//nucleus	GO:0001228//transcriptional activator activity, RNA polymerase II transcription regulatory region sequence-specific binding;GO:0043565//sequence-specific DNA binding	GO:0001942//hair follicle development;GO:0002260//lymphocyte homeostasis;GO:0002360//T cell lineage commitment;GO:0008544//epidermis development;GO:0010468//regulation of gene expression;GO:0030097//hemopoiesis;GO:0030216//keratinocyte differentiation;GO:0030858//positive regulation of epithelial cell differentiation;GO:0033081//regulation of T cell differentiation in thymus;GO:0035878//nail deve…
Sfur000372	29.11	4.783	4.54	CTH	Cystathionine gamma-lyase	Metabolism;Metabolism;Metabolism;Metabolism;Metabolism	Global and overview maps;Global and overview maps;Amino acid metabolism;Amino acid metabolism;Metabolism of other amino acids	ko01100//Metabolic pathways;ko01230//Biosynthesis of amino acids;ko00270//Cysteine and methionine metabolism;ko00260//Glycine, serine and threonine metabolism;ko00450//Selenocompound metabolism	K01758;K01758;K01758;K01758;K01758	GO:0005737//cytoplasm	GO:0004123//cystathionine gamma-lyase activity;GO:0005516//calmodulin binding;GO:0016846//carbon-sulfur lyase activity;GO:0030170//pyridoxal phosphate binding;GO:0044540//L-cystine L-cysteine-lyase (deaminating);GO:0080146//L-cysteine desulfhydrase activity	GO:0018272//protein-pyridoxal-5-phosphate linkage via peptidyl-N6-pyridoxal phosphate-L-lysine;GO:0019343//cysteine biosynthetic process via cystathionine;GO:0019344//cysteine biosynthetic process;GO:0019346//transsulfuration;GO:0043066//negative regulation of apoptotic process;GO:0043123//positive regulation of I-kappaB kinase/NF-kappaB signaling;GO:0044524//protein sulfhydration;GO:0051092//pos…
Sfur000380	3.237	1.393	1.743	--	S-phase kinase-associated protein 2	Human Diseases;Human Diseases;Genetic Information Processing;Environmental Information Processing;Cellular Processes;Human Diseases;Environmental Information Processing;Human Diseases	Cancers;Cancers;Folding, sorting and degradation;Signal transduction;Cell growth and death;Infectious diseases;Signal transduction;Cancers	ko05200//Pathways in cancer;ko05203//Viral carcinogenesis;ko04120//Ubiquitin mediated proteolysis;ko04150//mTOR signaling pathway;ko04110//Cell cycle;ko05169//Epstein-Barr virus infection;ko04068//FoxO signaling pathway;ko05222//Small cell lung cancer	K03875;K03875;K03875;K03875;K03875;K03875;K03875;K03875	GO:0005634//nucleus;GO:0005654//nucleoplasm;GO:0005730//nucleolus;GO:0005829//cytosol;GO:0019005//SCF ubiquitin ligase complex	GO:0042802//identical protein binding	GO:0000082//G1/S transition of mitotic cell cycle;GO:0000086//G2/M transition of mitotic cell cycle;GO:0000209//protein polyubiquitination;GO:0006511//ubiquitin-dependent protein catabolic process;GO:0031146//SCF-dependent proteasomal ubiquitin-dependent protein catabolic process;GO:0033148//positive regulation of intracellular estrogen receptor signaling pathway;GO:0042981//regulation of apoptot…
Sfur000387	20.013	0.617	0.67	anon-3B1.2	Circadian clock-controlled protein daywake	Genetic Information Processing;Human Diseases;Genetic Information Processing	Translation;Infectious diseases;Translation	ko03013//RNA transport;ko05166//HTLV-I infection;ko03008//Ribosome biogenesis in eukaryotes	K07936;K07936;K07936	-	-	GO:0007623//circadian rhythm
Sfur000392	59.213	26.107	23.69	Hsp90b1	Endoplasmin	Human Diseases;Environmental Information Processing;Human Diseases;Genetic Information Processing;Organismal Systems;Human Diseases;Organismal Systems;Human Diseases;Organismal Systems	Cancers;Signal transduction;Infectious diseases;Folding, sorting and degradation;Endocrine system;Cardiovascular diseases;Endocrine system;Cancers;Immune system	ko05200//Pathways in cancer;ko04151//PI3K-Akt signaling pathway;ko05132//Salmonella infection;ko04141//Protein processing in endoplasmic reticulum;ko04915//Estrogen signaling pathway;ko05418//Fluid shear stress and atherosclerosis;ko04918//Thyroid hormone synthesis;ko05215//Prostate cancer;ko04657//IL-17 signaling pathway	K09487;K09487;K09487;K09487;K09487;K09487;K09487;K09487;K09487	GO:0005783//endoplasmic reticulum;GO:0005788//endoplasmic reticulum lumen;GO:0005789//endoplasmic reticulum membrane;GO:0005790//smooth endoplasmic reticulum;GO:0005829//cytosol;GO:0005886//plasma membrane;GO:0030496//midbody;GO:0032991//macromolecular complex;GO:0033018//sarcoplasmic reticulum lumen;GO:0034663//endoplasmic reticulum chaperone complex;GO:0042470//melanosome;GO:0048471//perinuclea…	GO:0003723//RNA binding;GO:0005524//ATP binding;GO:0019903//protein phosphatase binding;GO:0050750//low-density lipoprotein particle receptor binding;GO:0051082//unfolded protein binding	GO:0001666//response to hypoxia;GO:0006457//protein folding;GO:0030433//ER-associated ubiquitin-dependent protein catabolic process;GO:0030970//retrograde protein transport, ER to cytosol;GO:0031247//actin rod assembly;GO:0043066//negative regulation of apoptotic process;GO:0043666//regulation of phosphoprotein phosphatase activity;GO:0071287//cellular response to manganese ion;GO:0071318//cellul…
Sfur000405	4.173	0.5	0.493	Ptbp1	Polypyrimidine tract-binding protein 1	-	-	-	-	GO:0005634//nucleus;GO:0005737//cytoplasm;GO:0044306//neuron projection terminus	GO:0000014//single-stranded DNA endodeoxyribonuclease activity;GO:0001069//regulatory region RNA binding;GO:0003697//single-stranded DNA binding;GO:0003729//mRNA binding;GO:0036002//pre-mRNA binding;GO:0043565//sequence-specific DNA binding	GO:0000381//regulation of alternative mRNA splicing, via spliceosome;GO:0000956//nuclear-transcribed mRNA catabolic process;GO:0003231//cardiac ventricle development;GO:0006397//mRNA processing;GO:0006417//regulation of translation;GO:0008380//RNA splicing;GO:0010976//positive regulation of neuron projection development;GO:0032024//positive regulation of insulin secretion;GO:0033119//negative reg…
Sfur000419	134.427	45.737	33.707	Calr	Calreticulin	Human Diseases;Genetic Information Processing;Human Diseases;Cellular Processes;Human Diseases;Human Diseases;Human Diseases;Human Diseases;Organismal Systems	Infectious diseases;Folding, sorting and degradation;Infectious diseases;Transport and catabolism;Infectious diseases;Infectious diseases;Infectious disease: viral;Infectious diseases;Immune system	ko05168//Herpes simplex infection;ko04141//Protein processing in endoplasmic reticulum;ko05166//HTLV-I infection;ko04145//Phagosome;ko05163//Human cytomegalovirus infection;ko05169//Epstein-Barr virus infection;ko05170//Human immunodeficiency virus 1 infection;ko05142//Chagas disease (American trypanosomiasis);ko04612//Antigen processing and presentation	K08057;K08057;K08057;K08057;K08057;K08057;K08057;K08057;K08057	GO:0005615//extracellular space;GO:0005788//endoplasmic reticulum lumen;GO:0005789//endoplasmic reticulum membrane;GO:0012505//endomembrane system;GO:0045169//fusome	GO:0005509//calcium ion binding;GO:0030246//carbohydrate binding;GO:0051082//unfolded protein binding	GO:0006457//protein folding;GO:0030431//sleep;GO:0030968//endoplasmic reticulum unfolded protein response;GO:0042048//olfactory behavior
Sfur000421	2.227	1.14	0.987	--	Putative uncharacterized protein	-	-	-	-	-	-	-
Sfur000422	123.693	35.4	36.703	SLC18B1	MFS-type transporter SLC18B1	Human Diseases;Organismal Systems;Human Diseases;Organismal Systems;Organismal Systems;Human Diseases;Human Diseases	Neurodegenerative diseases;Nervous system;Substance dependence;Nervous system;Nervous system;Substance dependence;Substance dependence	ko05012//Parkinson disease;ko04728//Dopaminergic synapse;ko05034//Alcoholism;ko04721//Synaptic vesicle cycle;ko04726//Serotonergic synapse;ko05031//Amphetamine addiction;ko05030//Cocaine addiction	K08155;K08155;K08155;K08155;K08155;K08155;K08155	GO:0016021//integral component of membrane	GO:0022857//transmembrane transporter activity	-
Sfur000423	7.553	0.153	0.227	--	Putative uncharacterized protein	-	-	-	-	-	-	-
Sfur000426	108.247	1.997	2.787	--	Protein takeout	-	-	-	-	GO:0005576//extracellular region;GO:0005615//extracellular space	-	GO:0007617//mating behavior;GO:0007622//rhythmic behavior;GO:0007623//circadian rhythm;GO:0007631//feeding behavior;GO:0008049//male courtship behavior;GO:0008343//adult feeding behavior;GO:0042594//response to starvation;GO:0042595//behavioral response to starvation
Sfur000443	23.197	11.49	11.143	SmD2	Probable small nuclear ribonucleoprotein Sm D2	Genetic Information Processing	Transcription	ko03040//Spliceosome	K11096	GO:0005681//spliceosomal complex;GO:0005682//U5 snRNP;GO:0005685//U1 snRNP;GO:0005686//U2 snRNP;GO:0030532//small nuclear ribonucleoprotein complex;GO:0046540//U4/U6 x U5 tri-snRNP complex;GO:0071011//precatalytic spliceosome;GO:0071013//catalytic step 2 spliceosome	GO:0003723//RNA binding	GO:0000278//mitotic cell cycle;GO:0000387//spliceosomal snRNP assembly;GO:0000398//mRNA splicing, via spliceosome
Sfur000444	4.087	1.893	2.02	--	Putative uncharacterized protein	-	-	-	-	-	-	-
Sfur000445	2.033	0.133	0.253	--	Putative uncharacterized protein	-	-	-	-	-	-	-
Sfur000450	1.743	0.657	0.717	gpkow	G-patch domain and KOW motifs-containing protein	-	-	-	-	GO:0005634//nucleus;GO:0005681//spliceosomal complex	GO:0003723//RNA binding	GO:0000398//mRNA splicing, via spliceosome
Sfur000463	4.14	2.243	2.063	--	Putative uncharacterized protein	-	-	-	-	-	-	-
Sfur000471	55.537	20.433	21.08	ATIC	Bifunctional purine biosynthesis protein ATIC	Metabolism;Metabolism;Human Diseases;Metabolism	Global and overview maps;Nucleotide metabolism;Drug resistance;Metabolism of cofactors and vitamins	ko01100//Metabolic pathways;ko00230//Purine metabolism;ko01523//Antifolate resistance;ko00670//One carbon pool by folate	K00602;K00602;K00602;K00602	-	GO:0003937//IMP cyclohydrolase activity;GO:0004643//phosphoribosylaminoimidazolecarboxamide formyltransferase activity;GO:0042803//protein homodimerization activity	GO:0006189//'de novo' IMP biosynthetic process
Sfur000480	74.27	28.74	28.88	NPEPL1	Probable aminopeptidase NPEPL1	Human Diseases;Human Diseases;Human Diseases;Environmental Information Processing;Cellular Processes;Human Diseases;Human Diseases;Environmental Information Processing;Human Diseases;Cellular Processes;Human Diseases;Human Diseases;Human Diseases;Human Diseases;Human Diseases	Neurodegenerative diseases;Cancers;Infectious diseases;Signal transduction;Cell motility;Cancers;Endocrine and metabolic diseases;Signal transduction;Cancers;Cellular community - eukaryotes;Cancers;Cancers;Cancers;Cancers;Cancers	ko05010//Alzheimer disease;ko05200//Pathways in cancer;ko05165//Human papillomavirus infection;ko04310//Wnt signaling pathway;ko04810//Regulation of actin cytoskeleton;ko05206//MicroRNAs in cancer;ko04934//Cushing syndrome;ko04390//Hippo signaling pathway;ko05225//Hepatocellular carcinoma;ko04550//Signaling pathways regulating pluripotency of stem cells;ko05226//Gastric cancer;ko05224//Breast can…	K02085;K02085;K02085;K02085;K02085;K02085;K02085;K02085;K02085;K02085;K02085;K02085;K02085;K02085;K02085	GO:0005634//nucleus;GO:0005737//cytoplasm	GO:0030145//manganese ion binding;GO:0070006//metalloaminopeptidase activity	-
Sfur000490	18.18	5.433	6.153	--	Multiple inositol polyphosphate phosphatase 1	Metabolism;Metabolism;Metabolism	Global and overview maps;Carbohydrate metabolism;Carbohydrate metabolism	ko01100//Metabolic pathways;ko00562//Inositol phosphate metabolism;ko00010//Glycolysis / Gluconeogenesis	K03103;K03103;K03103	GO:0005886//plasma membrane;GO:0016323//basolateral plasma membrane;GO:0016324//apical plasma membrane;GO:0030054//cell junction;GO:0030175//filopodium;GO:0031362//anchored component of external side of plasma membrane;GO:0070062//extracellular exosome	GO:0003993//acid phosphatase activity;GO:0034417//bisphosphoglycerate 3-phosphatase activity;GO:0052745//inositol phosphate phosphatase activity;GO:0052826//inositol hexakisphosphate 2-phosphatase activity	GO:0007424//open tracheal system development;GO:0016311//dephosphorylation;GO:0051491//positive regulation of filopodium assembly
Sfur000492	39.313	18.933	21.59	Vps13	Vacuolar protein sorting-associated protein 13	-	-	-	-	GO:0019898//extrinsic component of membrane;GO:0031902//late endosome membrane	-	GO:0006623//protein targeting to vacuole;GO:0019538//protein metabolic process;GO:0045053//protein retention in Golgi apparatus
Sfur000523	29.99	14.303	13.677	--	Putative uncharacterized protein	-	-	-	-	-	-	-
Sfur000531	21.307	10.457	10.713	mboat7	Lysophospholipid acyltransferase 7	Metabolism	Lipid metabolism	ko00564//Glycerophospholipid metabolism	K13516	GO:0016021//integral component of membrane	GO:0008374//O-acyltransferase activity	GO:0006661//phosphatidylinositol biosynthetic process;GO:0036149//phosphatidylinositol acyl-chain remodeling;GO:0036151//phosphatidylcholine acyl-chain remodeling
Sfur000550	7.91	3.233	2.713	cyp-44A1	Probable cytochrome P450 CYP44	-	-	-	-	-	GO:0004497//monooxygenase activity;GO:0005506//iron ion binding;GO:0016705//oxidoreductase activity, acting on paired donors, with incorporation or reduction of molecular oxygen;GO:0020037//heme binding	-
Sfur000558	13.973	2.59	3.503	--	Putative uncharacterized protein	-	-	-	-	-	-	-
Sfur000561	18.543	9.377	9.213	Gspt1	Eukaryotic peptide chain release factor GTP-binding subunit ERF3A	Genetic Information Processing	Translation	ko03015//mRNA surveillance pathway	K03267	GO:0005829//cytosol;GO:0018444//translation release factor complex	GO:0003747//translation release factor activity;GO:0003924//GTPase activity;GO:0005525//GTP binding	GO:0000184//nuclear-transcribed mRNA catabolic process, nonsense-mediated decay;GO:0002184//cytoplasmic translational termination;GO:0006412//translation;GO:0006449//regulation of translational termination;GO:0006479//protein methylation
Sfur000572	8.517	1.647	1.673	Pdia5	Protein disulfide-isomerase A5	-	-	-	-	GO:0005788//endoplasmic reticulum lumen	GO:0003756//protein disulfide isomerase activity;GO:0015037//peptide disulfide oxidoreductase activity	-
Sfur000580	8.36	4.19	3.92	CHN1	N-chimaerin	-	-	-	-	GO:0005829//cytosol	GO:0005096//GTPase activator activity;GO:0046872//metal ion binding;GO:0046875//ephrin receptor binding	GO:0008045//motor neuron axon guidance;GO:0035556//intracellular signal transduction;GO:0043087//regulation of GTPase activity;GO:0048013//ephrin receptor signaling pathway;GO:0050770//regulation of axonogenesis;GO:0051056//regulation of small GTPase mediated signal transduction
Sfur000584	5.807	1.463	1.69	--	Putative uncharacterized protein	-	-	-	-	-	-	-
Sfur000598	12.937	3.623	4.343	--	Solute carrier family 46 member 3	-	-	-	-	GO:0016021//integral component of membrane	GO:0022857//transmembrane transporter activity	-
Sfur000605	3.97	1.187	0.86	--	Putative uncharacterized protein	-	-	-	-	-	-	-
Sfur000608	12.993	0.537	0.307	Klkb1	Plasma kallikrein	-	-	-	-	GO:0005615//extracellular space	GO:0004252//serine-type endopeptidase activity	GO:0006954//inflammatory response;GO:0007596//blood coagulation;GO:0031639//plasminogen activation;GO:0042730//fibrinolysis;GO:0051919//positive regulation of fibrinolysis
Sfur000628	11.283	4.747	6.12	--	Putative uncharacterized protein	-	-	-	-	-	-	-
Sfur000630	144.003	1.97	3.403	--	Putative uncharacterized protein	Human Diseases;Human Diseases;Environmental Information Processing;Cellular Processes;Organismal Systems;Organismal Systems;Environmental Information Processing;Human Diseases;Human Diseases;Human Diseases	Cancers;Infectious diseases;Signal transduction;Cellular community - eukaryotes;Digestive system;Endocrine system;Signaling molecules and interaction;Infectious diseases;Endocrine and metabolic diseases;Cancers	ko05200//Pathways in cancer;ko05165//Human papillomavirus infection;ko04151//PI3K-Akt signaling pathway;ko04510//Focal adhesion;ko04974//Protein digestion and absorption;ko04926//Relaxin signaling pathway;ko04512//ECM-receptor interaction;ko05146//Amoebiasis;ko04933//AGE-RAGE signaling pathway in diabetic complications;ko05222//Small cell lung cancer	K06237;K06237;K06237;K06237;K06237;K06237;K06237;K06237;K06237;K06237	-	-	-
Sfur000636	8.63	4.893	4.237	--	Putative uncharacterized protein	-	-	-	-	-	-	-
Sfur000653	64.563	28.807	35.167	Pxd	Peroxidase	-	-	-	-	GO:0005576//extracellular region;GO:0042600//chorion	GO:0004601//peroxidase activity;GO:0020037//heme binding;GO:0046872//metal ion binding	GO:0006979//response to oxidative stress;GO:0007306//eggshell chorion assembly;GO:0018149//peptide cross-linking;GO:0018212//peptidyl-tyrosine modification;GO:0042744//hydrogen peroxide catabolic process
Sfur000667	51.677	25.807	26.66	PCBP3	Poly(rC)-binding protein 3	-	-	-	-	GO:0005634//nucleus;GO:0005737//cytoplasm;GO:0005829//cytosol;GO:0070062//extracellular exosome	GO:0001227//transcriptional repressor activity, RNA polymerase II transcription regulatory region sequence-specific binding;GO:0003690//double-stranded DNA binding;GO:0003723//RNA binding;GO:0003729//mRNA binding;GO:1990829//C-rich single-stranded DNA binding	GO:0010468//regulation of gene expression;GO:0016071//mRNA metabolic process;GO:0051252//regulation of RNA metabolic process
Sfur000672	17.227	6.26	5.827	SRSF2	Serine/arginine-rich splicing factor 2	Human Diseases;Genetic Information Processing	Infectious diseases;Transcription	ko05168//Herpes simplex infection;ko03040//Spliceosome	K12891;K12891	GO:0005634//nucleus;GO:0005681//spliceosomal complex;GO:0005737//cytoplasm;GO:0005829//cytosol;GO:0016607//nuclear speck	GO:0003723//RNA binding;GO:0036002//pre-mRNA binding	GO:0000381//regulation of alternative mRNA splicing, via spliceosome;GO:0045292//mRNA cis splicing, via spliceosome
Sfur000674	27.053	15.19	13.017	COPS6	COP9 signalosome complex subunit 6	-	-	-	-	GO:0005737//cytoplasm;GO:0008180//COP9 signalosome	GO:0008237//metallopeptidase activity;GO:0070122//isopeptidase activity	GO:0000338//protein deneddylation
Sfur000706	30.337	13.34	17.01	MRJP1	Protein yellow	Metabolism;Metabolism	Global and overview maps;Amino acid metabolism	ko01100//Metabolic pathways;ko00350//Tyrosine metabolism	K22203;K22203	GO:0005576//extracellular region	-	GO:0007275//multicellular organism development;GO:0042438//melanin biosynthetic process;GO:0060179//male mating behavior
Sfur000707	1.463	0.667	0.63	TIMELESS	Protein timeless homolog	-	-	-	-	GO:0000228//nuclear chromosome;GO:0000790//nuclear chromatin;GO:0005634//nucleus;GO:0005654//nucleoplasm;GO:0031298//replication fork protection complex;GO:0035861//site of double-strand break	GO:0003677//DNA binding;GO:0042802//identical protein binding	GO:0000076//DNA replication checkpoint;GO:0000122//negative regulation of transcription from RNA polymerase II promoter;GO:0001658//branching involved in ureteric bud morphogenesis;GO:0001822//kidney development;GO:0002009//morphogenesis of an epithelium;GO:0006260//DNA replication;GO:0006281//DNA repair;GO:0006974//cellular response to DNA damage stimulus;GO:0007623//circadian rhythm;GO:0009582/…
Sfur000712	5.88	2.71	2.957	PEX11G	Peroxisomal membrane protein 11C	Cellular Processes	Transport and catabolism	ko04146//Peroxisome	K13353	GO:0005777//peroxisome;GO:0005779//integral component of peroxisomal membrane;GO:0031231//intrinsic component of peroxisomal membrane;GO:0032991//macromolecular complex	-	GO:0016559//peroxisome fission;GO:0044375//regulation of peroxisome size
Sfur000726	75.867	30.753	33.14	MFSD11	UNC93-like protein MFSD11	-	-	-	-	GO:0016021//integral component of membrane	-	-
Sfur000728	37.123	19.88	17.733	DRG2	Developmentally-regulated GTP-binding protein 2	-	-	-	-	GO:0005634//nucleus;GO:0005654//nucleoplasm;GO:0005737//cytoplasm;GO:0005829//cytosol;GO:0016020//membrane;GO:0043231//intracellular membrane-bounded organelle	GO:0003723//RNA binding;GO:0003924//GTPase activity;GO:0005525//GTP binding;GO:0046872//metal ion binding	GO:0002181//cytoplasmic translation;GO:0007165//signal transduction
Sfur000729	3.41	1.63	1.657	hira	Protein HIRA	-	-	-	-	GO:0005634//nucleus	-	GO:0006325//chromatin organization;GO:0006351//transcription, DNA-templated;GO:0006355//regulation of transcription, DNA-templated
Sfur000733	9.033	3.317	3.22	NPEPL1	Probable aminopeptidase NPEPL1	-	-	-	-	GO:0005737//cytoplasm	GO:0030145//manganese ion binding;GO:0070006//metalloaminopeptidase activity	-
Sfur000734	2.82	0.72	0.893	--	Putative uncharacterized protein	-	-	-	-	-	-	-
Sfur000748	282.767	4.553	4.097	--	Putative uncharacterized protein	-	-	-	-	-	-	-
Sfur000753	8.033	3.913	4.007	POLR3F	DNA-directed RNA polymerase III subunit RPC6	Genetic Information Processing;Organismal Systems	Transcription;Immune system	ko03020//RNA polymerase;ko04623//Cytosolic DNA-sensing pathway	K03025;K03025	GO:0005654//nucleoplasm;GO:0005666//DNA-directed RNA polymerase III complex;GO:0005829//cytosol	GO:0003690//double-stranded DNA binding;GO:0003899//DNA-directed RNA polymerase activity	GO:0006359//regulation of transcription from RNA polymerase III promoter;GO:0006383//transcription from RNA polymerase III promoter;GO:0032481//positive regulation of type I interferon production;GO:0032728//positive regulation of interferon-beta production;GO:0045087//innate immune response;GO:0045089//positive regulation of innate immune response;GO:0051607//defense response to virus
Sfur000763	3.317	1	0.793	--	Putative uncharacterized protein	-	-	-	-	-	-	-
Sfur000770	9.25	1.927	2.357	TMEM165	Transmembrane protein 165	-	-	-	-	GO:0005765//lysosomal membrane;GO:0005794//Golgi apparatus;GO:0010008//endosome membrane;GO:0016021//integral component of membrane;GO:0031901//early endosome membrane;GO:0031902//late endosome membrane;GO:0032588//trans-Golgi network membrane;GO:0043231//intracellular membrane-bounded organelle	GO:0005384//manganese ion transmembrane transporter activity;GO:0015085//calcium ion transmembrane transporter activity;GO:0046873//metal ion transmembrane transporter activity	GO:0006487//protein N-linked glycosylation;GO:0006874//cellular calcium ion homeostasis;GO:0032468//Golgi calcium ion homeostasis;GO:0032472//Golgi calcium ion transport;GO:0035751//regulation of lysosomal lumen pH;GO:0070588//calcium ion transmembrane transport;GO:0071421//manganese ion transmembrane transport
Sfur000803	3.56	1.25	1.417	uhrf1	E3 ubiquitin-protein ligase UHRF1	-	-	-	-	GO:0000790//nuclear chromatin;GO:0000791//euchromatin;GO:0000792//heterochromatin;GO:0005657//replication fork;GO:0005720//nuclear heterochromatin	GO:0004842//ubiquitin-protein transferase activity;GO:0008270//zinc ion binding;GO:0035064//methylated histone binding;GO:0042393//histone binding;GO:0044729//hemi-methylated DNA-binding;GO:0061630//ubiquitin protein ligase activity	GO:0000122//negative regulation of transcription from RNA polymerase II promoter;GO:0006511//ubiquitin-dependent protein catabolic process;GO:0007049//cell cycle;GO:0010216//maintenance of DNA methylation;GO:0010390//histone monoubiquitination;GO:0016567//protein ubiquitination;GO:0016574//histone ubiquitination;GO:0051865//protein autoubiquitination
Sfur000804	78.78	15.85	18.083	--	Myosin-9	Human Diseases;Cellular Processes;Human Diseases	Infectious diseases;Cellular community - eukaryotes;Infectious diseases	ko05132//Salmonella infection;ko04530//Tight junction;ko05130//Pathogenic Escherichia coli infection	K10352;K10352;K10352	GO:0001725//stress fiber;GO:0001726//ruffle;GO:0005634//nucleus;GO:0005737//cytoplasm;GO:0005826//actomyosin contractile ring;GO:0005829//cytosol;GO:0005886//plasma membrane;GO:0015629//actin cytoskeleton;GO:0016459//myosin complex;GO:0031252//cell leading edge;GO:0032154//cleavage furrow;GO:0032991//macromolecular complex	GO:0000146//microfilament motor activity;GO:0005178//integrin binding;GO:0005516//calmodulin binding;GO:0005524//ATP binding;GO:0016887//ATPase activity;GO:0042803//protein homodimerization activity;GO:0043495//protein anchor;GO:0043621//protein self-association;GO:0051015//actin filament binding	GO:0001525//angiogenesis;GO:0006509//membrane protein ectodomain proteolysis;GO:0008360//regulation of cell shape;GO:0015031//protein transport;GO:0030048//actin filament-based movement;GO:0030220//platelet formation;GO:0030224//monocyte differentiation;GO:0031034//myosin filament assembly;GO:0031532//actin cytoskeleton reorganization;GO:0032506//cytokinetic process;GO:0043534//blood vessel endot…
Sfur000808	38.89	15.597	16.59	PLD3	5'-3' exonuclease PLD3	Metabolism;Metabolism;Metabolism	Global and overview maps;Lipid metabolism;Lipid metabolism	ko01100//Metabolic pathways;ko00564//Glycerophospholipid metabolism;ko00565//Ether lipid metabolism	K16860;K16860;K16860	GO:0000139//Golgi membrane;GO:0005789//endoplasmic reticulum membrane;GO:0016021//integral component of membrane;GO:0031901//early endosome membrane;GO:0031902//late endosome membrane;GO:0043202//lysosomal lumen	GO:0045145//single-stranded DNA 5'-3' exodeoxyribonuclease activity	GO:0002376//immune system process;GO:0006954//inflammatory response;GO:0014902//myotube differentiation
Sfur000815	6.793	3.283	3.593	AUH	Methylglutaconyl-CoA hydratase, mitochondrial	Metabolism;Metabolism	Global and overview maps;Amino acid metabolism	ko01100//Metabolic pathways;ko00280//Valine, leucine and isoleucine degradation	K05607;K05607	GO:0005739//mitochondrion;GO:0005759//mitochondrial matrix	GO:0003730//mRNA 3'-UTR binding;GO:0004300//enoyl-CoA hydratase activity;GO:0004490//methylglutaconyl-CoA hydratase activity;GO:0050011//itaconyl-CoA hydratase activity	GO:0006552//leucine catabolic process;GO:0006635//fatty acid beta-oxidation;GO:0009083//branched-chain amino acid catabolic process
Sfur000826	113.487	2.83	1.867	--	Putative uncharacterized protein	-	-	-	-	-	-	-
Sfur000838	6.083	1.92	2.31	SLC26A11	Sodium-independent sulfate anion transporter	-	-	-	-	GO:0005654//nucleoplasm;GO:0005765//lysosomal membrane;GO:0005783//endoplasmic reticulum;GO:0005794//Golgi apparatus;GO:0005886//plasma membrane;GO:0005887//integral component of plasma membrane;GO:0016021//integral component of membrane;GO:0043231//intracellular membrane-bounded organelle;GO:0070062//extracellular exosome	GO:0008271//secondary active sulfate transmembrane transporter activity;GO:0008509//anion transmembrane transporter activity;GO:0015116//sulfate transmembrane transporter activity;GO:0015301//anion:anion antiporter activity	GO:0006811//ion transport;GO:0008272//sulfate transport
Sfur000855	10.613	5.76	4.803	Ssk	Protein snakeskin	-	-	-	-	GO:0005918//septate junction;GO:0016021//integral component of membrane;GO:0016327//apicolateral plasma membrane	-	GO:0019991//septate junction assembly
Sfur000865	5.143	0.6	0.32	--	Putative uncharacterized protein	-	-	-	-	-	-	-
Sfur000867	80.043	30.627	27.037	SEC11A	Signal peptidase complex catalytic subunit SEC11A	Genetic Information Processing	Folding, sorting and degradation	ko03060//Protein export	K13280	GO:0005787//signal peptidase complex;GO:0016021//integral component of membrane	GO:0004252//serine-type endopeptidase activity;GO:0008233//peptidase activity	GO:0006465//signal peptide processing
Sfur000869	6.81	3.353	2.72	TSPAN31	Tetraspanin-31	-	-	-	-	GO:0005887//integral component of plasma membrane	-	-
Sfur000870	90.36	37.427	37.317	hoga1	4-hydroxy-2-oxoglutarate aldolase, mitochondrial	Metabolism;Metabolism;Metabolism	Global and overview maps;Amino acid metabolism;Carbohydrate metabolism	ko01100//Metabolic pathways;ko00330//Arginine and proline metabolism;ko00630//Glyoxylate and dicarboxylate metabolism	K18123;K18123;K18123	GO:0005739//mitochondrion	GO:0008700//4-hydroxy-2-oxoglutarate aldolase activity	-
Sfur000881	9.037	3.363	3.09	Lip1	Lipase 1	Cellular Processes;Organismal Systems;Metabolism	Transport and catabolism;Digestive system;Lipid metabolism	ko04142//Lysosome;ko04979//Cholesterol metabolism;ko00100//Steroid biosynthesis	K01052;K01052;K01052	GO:0005576//extracellular region	GO:0004771//sterol esterase activity;GO:0004806//triglyceride lipase activity	GO:0007586//digestion;GO:0016042//lipid catabolic process
Sfur000889	1.33	0.543	0.66	--	Putative uncharacterized protein	-	-	-	-	-	-	-
Sfur000901	15.323	0.237	0.447	--	Putative uncharacterized protein	Genetic Information Processing;Human Diseases;Genetic Information Processing	Translation;Infectious diseases;Translation	ko03013//RNA transport;ko05166//HTLV-I infection;ko03008//Ribosome biogenesis in eukaryotes	K07936;K07936;K07936	-	-	-
Sfur000904	3.66	1.043	0.963	--	Putative uncharacterized protein	-	-	-	-	-	-	-
Sfur000913	52.507	28.987	25.383	--	Putative uncharacterized protein	-	-	-	-	-	-	-
Sfur000915	6.54	2.617	2.337	--	Putative uncharacterized protein	Environmental Information Processing;Organismal Systems;Organismal Systems;Human Diseases;Human Diseases;Human Diseases;Organismal Systems	Signal transduction;Endocrine system;Circulatory system;Cardiovascular diseases;Cardiovascular diseases;Cardiovascular diseases;Circulatory system	ko04010//MAPK signaling pathway;ko04921//Oxytocin signaling pathway;ko04261//Adrenergic signaling in cardiomyocytes;ko05414//Dilated cardiomyopathy (DCM);ko05410//Hypertrophic cardiomyopathy (HCM);ko05412//Arrhythmogenic right ventricular cardiomyopathy (ARVC);ko04260//Cardiac muscle contraction	K04870;K04870;K04870;K04870;K04870;K04870;K04870	-	-	-
Sfur000923	16.607	7.797	5.997	y	Protein yellow	Metabolism;Metabolism	Global and overview maps;Amino acid metabolism	ko01100//Metabolic pathways;ko00350//Tyrosine metabolism	K22203;K22203	GO:0005576//extracellular region	-	GO:0007275//multicellular organism development;GO:0042438//melanin biosynthetic process;GO:0060179//male mating behavior
Sfur000927	3.407	1.637	1.783	Mrgbp	MRG/MORF4L-binding protein	-	-	-	-	GO:0005654//nucleoplasm;GO:0035267//NuA4 histone acetyltransferase complex	-	GO:0006357//regulation of transcription from RNA polymerase II promoter;GO:0016573//histone acetylation;GO:0040008//regulation of growth
Sfur000934	19.537	9.133	9.59	--	Putative uncharacterized protein	Organismal Systems	Development and regeneration	ko04361//Axon regeneration	K23480	-	-	-
Sfur000970	190.387	47.063	46.21	zip	Myosin heavy chain, non-muscle	Human Diseases;Cellular Processes;Human Diseases	Infectious diseases;Cellular community - eukaryotes;Infectious diseases	ko05132//Salmonella infection;ko04530//Tight junction;ko05130//Pathogenic Escherichia coli infection	K10352;K10352;K10352	GO:0005826//actomyosin contractile ring;GO:0005829//cytosol;GO:0005929//cilium;GO:0005938//cell cortex;GO:0016460//myosin II complex;GO:0030018//Z disc;GO:0031252//cell leading edge;GO:0032154//cleavage furrow;GO:0044291//cell-cell contact zone	GO:0003774//motor activity;GO:0003779//actin binding;GO:0005516//calmodulin binding;GO:0005524//ATP binding;GO:0030898//actin-dependent ATPase activity;GO:0032027//myosin light chain binding;GO:0042802//identical protein binding	GO:0000281//mitotic cytokinesis;GO:0006936//muscle contraction;GO:0007298//border follicle cell migration;GO:0007391//dorsal closure;GO:0007395//dorsal closure, spreading of leading edge cells;GO:0007435//salivary gland morphogenesis;GO:0007443//Malpighian tubule morphogenesis;GO:0007455//eye-antennal disc morphogenesis;GO:0007496//anterior midgut development;GO:0008258//head involution;GO:003023…
Sfur000977	5.19	2.347	2.903	Wdr13	WD repeat-containing protein 13	-	-	-	-	GO:0005654//nucleoplasm;GO:0005886//plasma membrane;GO:0034451//centriolar satellite	GO:1990841//promoter-specific chromatin binding	GO:1904691//negative regulation of type B pancreatic cell proliferation
Sfur000982	23.2	8.853	8.997	l(2)gl	Lethal(2) giant larvae protein	Human Diseases;Cellular Processes;Environmental Information Processing;Environmental Information Processing	Infectious diseases;Cellular community - eukaryotes;Signal transduction;Signal transduction	ko05165//Human papillomavirus infection;ko04530//Tight junction;ko04390//Hippo signaling pathway;ko04391//Hippo signaling pathway -fly	K06094;K06094;K06094;K06094	GO:0000139//Golgi membrane;GO:0005737//cytoplasm;GO:0005886//plasma membrane;GO:0005920//smooth septate junction;GO:0005938//cell cortex;GO:0016327//apicolateral plasma membrane;GO:0030863//cortical cytoskeleton;GO:0030864//cortical actin cytoskeleton;GO:0031012//extracellular matrix;GO:0031256//leading edge membrane;GO:0042734//presynaptic membrane	GO:0000149//SNARE binding;GO:0004860//protein kinase inhibitor activity;GO:0005096//GTPase activator activity;GO:0017022//myosin binding;GO:0017137//Rab GTPase binding;GO:0019901//protein kinase binding;GO:0019905//syntaxin binding;GO:0045159//myosin II binding	GO:0000132//establishment of mitotic spindle orientation;GO:0006469//negative regulation of protein kinase activity;GO:0006887//exocytosis;GO:0007314//oocyte anterior/posterior axis specification;GO:0007391//dorsal closure;GO:0007399//nervous system development;GO:0007406//negative regulation of neuroblast proliferation;GO:0007423//sensory organ development;GO:0008593//regulation of Notch signali…
Sfur000997	8.413	4.05	3.85	Phf14	PHD finger protein 14	-	-	-	-	GO:0005634//nucleus;GO:0070776//MOZ/MORF histone acetyltransferase complex	GO:0042393//histone binding;GO:0046872//metal ion binding	GO:0000122//negative regulation of transcription from RNA polymerase II promoter;GO:0006357//regulation of transcription from RNA polymerase II promoter;GO:0008285//negative regulation of cell proliferation;GO:0043972//histone H3-K23 acetylation;GO:0044154//histone H3-K14 acetylation;GO:0048286//lung alveolus development;GO:0072201//negative regulation of mesenchymal cell proliferation;GO:2000584…
Sfur001000	28.657	11.823	9.44	Drip	Aquaporin	-	-	-	-	GO:0005886//plasma membrane;GO:0016021//integral component of membrane	GO:0015250//water channel activity	GO:0003014//renal system process;GO:0006833//water transport;GO:0030104//water homeostasis;GO:0046662//regulation of oviposition;GO:0055085//transmembrane transport
Sfur001006	16.013	7.67	8.453	--	Putative uncharacterized protein	-	-	-	-	-	-	-
Sfur001038	4.707	1.863	1.893	--	Putative uncharacterized protein	Genetic Information Processing;Genetic Information Processing	Replication and repair;Replication and repair	ko03420//Nucleotide excision repair;ko03460//Fanconi anemia pathway	K10848;K10848	-	-	-
Sfur001043	23.897	10.453	9.183	KdelR	ER lumen protein-retaining receptor	Human Diseases	Infectious diseases	ko05110//Vibrio cholerae infection	K10949	GO:0005783//endoplasmic reticulum;GO:0005789//endoplasmic reticulum membrane;GO:0005794//Golgi apparatus;GO:0005801//cis-Golgi network;GO:0016021//integral component of membrane	GO:0005046//KDEL sequence binding;GO:0046923//ER retention sequence binding	GO:0006621//protein retention in ER lumen;GO:0006888//ER to Golgi vesicle-mediated transport;GO:0015031//protein transport
Sfur001046	33.347	16.693	15.453	SRSF2	Serine/arginine-rich splicing factor 2	Human Diseases;Genetic Information Processing	Infectious diseases;Transcription	ko05168//Herpes simplex infection;ko03040//Spliceosome	K12891;K12891	GO:0005634//nucleus;GO:0005681//spliceosomal complex;GO:0005737//cytoplasm;GO:0005829//cytosol;GO:0016607//nuclear speck	GO:0003723//RNA binding;GO:0036002//pre-mRNA binding	GO:0000381//regulation of alternative mRNA splicing, via spliceosome;GO:0045292//mRNA cis splicing, via spliceosome
Sfur001063	15.57	8.51	7.393	Ppcs	Phosphopantothenate--cysteine ligase	Metabolism;Metabolism	Global and overview maps;Metabolism of cofactors and vitamins	ko01100//Metabolic pathways;ko00770//Pantothenate and CoA biosynthesis	K01922;K01922	GO:0005634//nucleus;GO:0005737//cytoplasm	GO:0004632//phosphopantothenate--cysteine ligase activity;GO:0005524//ATP binding;GO:0042802//identical protein binding;GO:0042803//protein homodimerization activity	GO:0003015//heart process;GO:0006085//acetyl-CoA biosynthetic process;GO:0015937//coenzyme A biosynthetic process
Sfur001067	130.827	44.447	39.903	--	Probable chitinase 10	Metabolism;Metabolism	Global and overview maps;Carbohydrate metabolism	ko01100//Metabolic pathways;ko00520//Amino sugar and nucleotide sugar metabolism	K01183;K01183	GO:0005576//extracellular region	GO:0004568//chitinase activity;GO:0008061//chitin binding	GO:0000272//polysaccharide catabolic process;GO:0006032//chitin catabolic process
Sfur001080	3.56	1.73	2.113	Ppig	Peptidyl-prolyl cis-trans isomerase G	-	-	-	-	GO:0005634//nucleus;GO:0005654//nucleoplasm;GO:0005737//cytoplasm;GO:0005829//cytosol;GO:0016363//nuclear matrix;GO:0016607//nuclear speck;GO:0043231//intracellular membrane-bounded organelle	GO:0003723//RNA binding;GO:0003755//peptidyl-prolyl cis-trans isomerase activity;GO:0016018//cyclosporin A binding	GO:0000413//protein peptidyl-prolyl isomerization;GO:0006457//protein folding;GO:0008380//RNA splicing
Sfur001100	5.467	2.593	2.427	--	Protein ELYS	-	-	-	-	GO:0000777//condensed chromosome kinetochore;GO:0005634//nucleus;GO:0005643//nuclear pore;GO:0005654//nucleoplasm;GO:0005829//cytosol;GO:0016363//nuclear matrix;GO:0031965//nuclear membrane;GO:0070062//extracellular exosome	GO:0003677//DNA binding;GO:0003700//transcription factor activity, sequence-specific DNA binding	GO:0007049//cell cycle;GO:0015031//protein transport;GO:0032465//regulation of cytokinesis;GO:0051028//mRNA transport;GO:0051292//nuclear pore complex assembly;GO:0051301//cell division
Sfur001103	12.513	4.423	4.7	--	Putative uncharacterized protein	-	-	-	-	-	-	-
Sfur001114	0.377	0.137	0.19	--	Putative uncharacterized protein	-	-	-	-	-	-	-
Sfur001135	48.007	25.213	21.727	SLC26A11	Sodium-independent sulfate anion transporter	-	-	-	-	GO:0005654//nucleoplasm;GO:0005765//lysosomal membrane;GO:0005783//endoplasmic reticulum;GO:0005794//Golgi apparatus;GO:0005886//plasma membrane;GO:0005887//integral component of plasma membrane;GO:0016021//integral component of membrane;GO:0043231//intracellular membrane-bounded organelle;GO:0070062//extracellular exosome	GO:0008271//secondary active sulfate transmembrane transporter activity;GO:0008509//anion transmembrane transporter activity;GO:0015116//sulfate transmembrane transporter activity;GO:0015301//anion:anion antiporter activity	GO:0006811//ion transport;GO:0008272//sulfate transport
Sfur001136	17.543	6.323	7.287	--	Putative uncharacterized protein	-	-	-	-	-	-	-
Sfur001142	4.27	1.52	1.403	Esco2	N-acetyltransferase ESCO2	-	-	-	-	GO:0000785//chromatin;GO:0001741//XY body;GO:0005654//nucleoplasm;GO:0005694//chromosome;GO:0005794//Golgi apparatus;GO:0010369//chromocenter;GO:0030054//cell junction;GO:0031618//nuclear pericentric heterochromatin;GO:0035861//site of double-strand break	GO:0004468//lysine N-acetyltransferase activity, acting on acetyl phosphate as donor;GO:0016407//acetyltransferase activity;GO:0046872//metal ion binding	GO:0002244//hematopoietic progenitor cell differentiation;GO:0006275//regulation of DNA replication;GO:0006302//double-strand break repair;GO:0007059//chromosome segregation;GO:0007062//sister chromatid cohesion;GO:0034421//post-translational protein acetylation;GO:0071168//protein localization to chromatin
Sfur001144	34.037	13.11	13.173	Hrb87F	Heterogeneous nuclear ribonucleoprotein 87F	Genetic Information Processing	Transcription	ko03040//Spliceosome	K12741	GO:0000785//chromatin;GO:0000792//heterochromatin;GO:0005634//nucleus;GO:0005654//nucleoplasm;GO:0005703//polytene chromosome puff;GO:0005737//cytoplasm;GO:0035062//omega speckle;GO:1990904//ribonucleoprotein complex	GO:0003729//mRNA binding;GO:0003730//mRNA 3'-UTR binding;GO:0008266//poly(U) RNA binding;GO:0034046//poly(G) binding;GO:0043565//sequence-specific DNA binding	GO:0000278//mitotic cell cycle;GO:0000381//regulation of alternative mRNA splicing, via spliceosome;GO:0001745//compound eye morphogenesis;GO:0008585//female gonad development;GO:0009408//response to heat;GO:0042594//response to starvation;GO:0048026//positive regulation of mRNA splicing, via spliceosome
Sfur001151	297.343	90.87	74.65	PDIA3	Protein disulfide-isomerase A3	Human Diseases;Genetic Information Processing;Human Diseases;Human Diseases;Human Diseases;Organismal Systems	Infectious diseases;Folding, sorting and degradation;Infectious diseases;Infectious diseases;Infectious disease: viral;Immune system	ko05168//Herpes simplex infection;ko04141//Protein processing in endoplasmic reticulum;ko05163//Human cytomegalovirus infection;ko05169//Epstein-Barr virus infection;ko05170//Human immunodeficiency virus 1 infection;ko04612//Antigen processing and presentation	K08056;K08056;K08056;K08056;K08056;K08056	GO:0005615//extracellular space;GO:0005634//nucleus;GO:0005783//endoplasmic reticulum;GO:0005788//endoplasmic reticulum lumen;GO:0005925//focal adhesion;GO:0009986//cell surface;GO:0042470//melanosome;GO:0042824//MHC class I peptide loading complex;GO:0045335//phagocytic vesicle;GO:0055038//recycling endosome membrane;GO:0070062//extracellular exosome	GO:0003723//RNA binding;GO:0003756//protein disulfide isomerase activity;GO:0004197//cysteine-type endopeptidase activity;GO:0004629//phospholipase C activity;GO:0015036//disulfide oxidoreductase activity;GO:0015037//peptide disulfide oxidoreductase activity;GO:0042802//identical protein binding	GO:0002474//antigen processing and presentation of peptide antigen via MHC class I;GO:0002479//antigen processing and presentation of exogenous peptide antigen via MHC class I, TAP-dependent;GO:0006457//protein folding;GO:0034975//protein folding in endoplasmic reticulum;GO:0034976//response to endoplasmic reticulum stress;GO:0098761//cellular response to interleukin-7;GO:2001238//positive regula…
Sfur001154	143.857	16.87	14.977	RDH13	Retinol dehydrogenase 13	Metabolism;Metabolism	Global and overview maps;Metabolism of cofactors and vitamins	ko01100//Metabolic pathways;ko00830//Retinol metabolism	K11153;K11153	GO:0005743//mitochondrial inner membrane	GO:0052650//NADP-retinol dehydrogenase activity	GO:0009644//response to high light intensity;GO:0010842//retina layer formation;GO:0042462//eye photoreceptor cell development;GO:0042574//retinal metabolic process
Sfur001160	14.047	3.65	3.193	--	Putative uncharacterized protein	-	-	-	-	-	-	-
Sfur001161	6.263	3.18	2.71	Agrn	Agrin	Environmental Information Processing	Signaling molecules and interaction	ko04512//ECM-receptor interaction	K06254	GO:0005576//extracellular region;GO:0005604//basement membrane;GO:0005615//extracellular space;GO:0005796//Golgi lumen;GO:0005829//cytosol;GO:0005886//plasma membrane;GO:0009986//cell surface;GO:0016021//integral component of membrane;GO:0042383//sarcolemma;GO:0043083//synaptic cleft;GO:0044295//axonal growth cone;GO:0045202//synapse	GO:0002162//dystroglycan binding;GO:0005509//calcium ion binding;GO:0030548//acetylcholine receptor regulator activity;GO:0033691//sialic acid binding;GO:0035374//chondroitin sulfate binding;GO:0036122//BMP binding;GO:0042030//ATPase inhibitor activity;GO:0043395//heparan sulfate proteoglycan binding;GO:0044325//ion channel binding;GO:0050431//transforming growth factor beta binding	GO:0001932//regulation of protein phosphorylation;GO:0001934//positive regulation of protein phosphorylation;GO:0007009//plasma membrane organization;GO:0007268//synaptic transmission;GO:0007416//synapse assembly;GO:0007528//neuromuscular junction development;GO:0009887//organ morphogenesis;GO:0009888//tissue development;GO:0032092//positive regulation of protein binding;GO:0043087//regulation of…
Sfur001173	14.83	0.23	0.093	--	Putative uncharacterized protein	-	-	-	-	-	-	-
Sfur001236	9.443	3.22	4.433	Sym	Symplekin	Cellular Processes;Genetic Information Processing	Cellular community - eukaryotes;Translation	ko04530//Tight junction;ko03015//mRNA surveillance pathway	K06100;K06100	GO:0005634//nucleus;GO:0005847//mRNA cleavage and polyadenylation specificity factor complex;GO:0035363//histone locus body;GO:0061689//tricellular tight junction	GO:0003723//RNA binding	GO:0006378//mRNA polyadenylation;GO:0006398//mRNA 3'-end processing by stem-loop binding and cleavage
Sfur001243	2.413	0.997	0.89	Dscam2	Down syndrome cell adhesion molecule-like protein Dscam2	-	-	-	-	GO:0005886//plasma membrane;GO:0005887//integral component of plasma membrane;GO:0030424//axon	GO:0042802//identical protein binding;GO:0098632//protein binding involved in cell-cell adhesion	GO:0007156//homophilic cell adhesion via plasma membrane adhesion molecules;GO:0007411//axon guidance;GO:0048812//neuron projection morphogenesis;GO:0070593//dendrite self-avoidance
Sfur001250	22.787	11.07	10.883	calub	Calumenin-B	-	-	-	-	GO:0005576//extracellular region;GO:0005789//endoplasmic reticulum membrane;GO:0005794//Golgi apparatus;GO:0033018//sarcoplasmic reticulum lumen;GO:0042470//melanosome	GO:0005509//calcium ion binding	-
Sfur001254	29.577	12.517	14.473	Cyp301a1	Probable cytochrome P450 301a1, mitochondrial	-	-	-	-	GO:0031966//mitochondrial membrane	GO:0004497//monooxygenase activity;GO:0005506//iron ion binding;GO:0016705//oxidoreductase activity, acting on paired donors, with incorporation or reduction of molecular oxygen;GO:0020037//heme binding	GO:0007490//tergite morphogenesis
Sfur001276	15.32	9.087	7.55	sqd	RNA-binding protein squid	Organismal Systems	Development	ko04320//Dorso-ventral axis formation	K03102	GO:0000785//chromatin;GO:0005634//nucleus;GO:0005654//nucleoplasm;GO:0005703//polytene chromosome puff;GO:0005737//cytoplasm;GO:0035062//omega speckle;GO:0071011//precatalytic spliceosome;GO:0071013//catalytic step 2 spliceosome	GO:0003729//mRNA binding;GO:0003730//mRNA 3'-UTR binding;GO:0043565//sequence-specific DNA binding;GO:1990837//sequence-specific double-stranded DNA binding	GO:0000184//nuclear-transcribed mRNA catabolic process, nonsense-mediated decay;GO:0000381//regulation of alternative mRNA splicing, via spliceosome;GO:0000398//mRNA splicing, via spliceosome;GO:0006405//RNA export from nucleus;GO:0006406//mRNA export from nucleus;GO:0007293//germarium-derived egg chamber formation;GO:0007297//ovarian follicle cell migration;GO:0007314//oocyte anterior/posterior …
Sfur001284	2.97	0.877	0.72	CG12206	Glutaredoxin domain-containing cysteine-rich protein CG31559	-	-	-	-	-	GO:0009055//electron carrier activity;GO:0015035//protein disulfide oxidoreductase activity	-
Sfur001295	5.36	1.637	1.31	tsl	Torso-like protein	Environmental Information Processing	Signal transduction	ko04013//MAPK signaling pathway - fly	K12377	GO:0005615//extracellular space	GO:0005122//torso binding;GO:0030546//receptor activator activity	GO:0007278//pole cell fate determination;GO:0007281//germ cell development;GO:0007362//terminal region determination;GO:0008293//torso signaling pathway;GO:0008358//maternal determination of anterior/posterior axis, embryo;GO:0009880//embryonic pattern specification;GO:0035073//pupariation;GO:0040018//positive regulation of multicellular organism growth
Sfur001311	4.903	1.457	1.953	CG12206	Glutaredoxin domain-containing cysteine-rich protein CG31559	-	-	-	-	-	GO:0009055//electron carrier activity;GO:0015035//protein disulfide oxidoreductase activity	-
Sfur001312	18.9	9.687	8.557	St13	Hsc70-interacting protein	-	-	-	-	GO:0005829//cytosol;GO:0032991//macromolecular complex	GO:0019904//protein domain specific binding;GO:0030544//Hsp70 protein binding;GO:0031072//heat shock protein binding;GO:0032564//dATP binding;GO:0042802//identical protein binding;GO:0044877//macromolecular complex binding;GO:0046983//protein dimerization activity;GO:0051082//unfolded protein binding;GO:0051087//chaperone binding	GO:0009617//response to bacterium;GO:0051085//chaperone mediated protein folding requiring cofactor;GO:0061077//chaperone-mediated protein folding;GO:0061084//negative regulation of protein refolding;GO:0065003//macromolecular complex assembly
Sfur001318	9.917	4.25	5.323	rg	Neurobeachin	-	-	-	-	GO:0005737//cytoplasm;GO:0005829//cytosol;GO:0016020//membrane;GO:0016021//integral component of membrane;GO:0043025//neuronal cell body;GO:0043204//perikaryon	GO:0019901//protein kinase binding;GO:0051018//protein kinase A binding	GO:0007528//neuromuscular junction development;GO:0007614//short-term memory;GO:0008104//protein localization;GO:0008355//olfactory learning;GO:0016319//mushroom body development;GO:0042462//eye photoreceptor cell development;GO:0042675//compound eye cone cell differentiation
Sfur001323	4.62	1.253	1.603	SOX5	Transcription factor SOX-6	-	-	-	-	GO:0000790//nuclear chromatin;GO:0005634//nucleus;GO:0005654//nucleoplasm	GO:0000976//transcription regulatory region sequence-specific DNA binding;GO:0000978//RNA polymerase II core promoter proximal region sequence-specific DNA binding;GO:0000981//RNA polymerase II transcription factor activity, sequence-specific DNA binding;GO:0001217//bacterial-type RNA polymerase transcriptional repressor activity, sequence-specific DNA binding;GO:0001227//transcriptional represso…	GO:0000902//cell morphogenesis;GO:0001502//cartilage condensation;GO:0001701//in utero embryonic development;GO:0002062//chondrocyte differentiation;GO:0006355//regulation of transcription, DNA-templated;GO:0007417//central nervous system development;GO:0007517//muscle organ development;GO:0009791//post-embryonic development;GO:0016458//gene silencing;GO:0021529//spinal cord oligodendrocyte cell …
Sfur001333	9.383	1.327	0.797	tropG	Retinol dehydrogenase 14	-	-	-	-	GO:0001750//photoreceptor outer segment;GO:0005783//endoplasmic reticulum	GO:0052650//NADP-retinol dehydrogenase activity	GO:0042572//retinol metabolic process
Sfur001369	10.75	4.557	4.157	Plaa	Phospholipase A-2-activating protein	Genetic Information Processing	Folding, sorting and degradation	ko04141//Protein processing in endoplasmic reticulum	K14018	GO:0005634//nucleus;GO:0005737//cytoplasm;GO:0045202//synapse;GO:0070062//extracellular exosome	GO:0016005//phospholipase A2 activator activity;GO:0043130//ubiquitin binding	GO:0006693//prostaglandin metabolic process;GO:0006954//inflammatory response;GO:0010992//ubiquitin homeostasis;GO:0016236//macroautophagy;GO:0032430//positive regulation of phospholipase A2 activity;GO:0043161//proteasome-mediated ubiquitin-dependent protein catabolic process;GO:0043162//ubiquitin-dependent protein catabolic process via the multivesicular body sorting pathway;GO:0071222//cellula…
Sfur001393	2.98	1.647	1.473	--	Putative uncharacterized protein	-	-	-	-	-	-	-
Sfur001398	2.55	1.063	0.95	AAEL008960	Regulator of telomere elongation helicase 1 homolog	-	-	-	-	GO:0005634//nucleus	GO:0003677//DNA binding;GO:0003678//DNA helicase activity;GO:0005524//ATP binding;GO:0046872//metal ion binding;GO:0051539//4 iron, 4 sulfur cluster binding	GO:0000723//telomere maintenance;GO:0006260//DNA replication;GO:0006281//DNA repair;GO:0006310//DNA recombination;GO:0010569//regulation of double-strand break repair via homologous recombination
Sfur001410	15.063	2.99	2.153	Est-6	Venom carboxylesterase-6	Metabolism	Metabolism of terpenoids and polyketides	ko00981//Insect hormone biosynthesis	K01063	GO:0005576//extracellular region	GO:0080030//methyl indole-3-acetate esterase activity	-
Sfur001412	5.683	2.463	3.04	Tmtc3	Protein O-mannosyl-transferase Tmtc3	-	-	-	-	GO:0005783//endoplasmic reticulum;GO:0016021//integral component of membrane	GO:0000030//mannosyltransferase activity;GO:0004169//dolichyl-phosphate-mannose-protein mannosyltransferase activity	GO:0035269//protein O-linked mannosylation
Sfur001417	31.603	17.623	15.767	Lars1	Leucine--tRNA ligase, cytoplasmic	Genetic Information Processing	Translation	ko00970//Aminoacyl-tRNA biosynthesis	K01869	GO:0005737//cytoplasm;GO:0005764//lysosome;GO:0005783//endoplasmic reticulum;GO:0005829//cytosol;GO:0012505//endomembrane system;GO:0016604//nuclear body;GO:0017101//aminoacyl-tRNA synthetase multienzyme complex	GO:0002161//aminoacyl-tRNA editing activity;GO:0004819//glutamine-tRNA ligase activity;GO:0004823//leucine-tRNA ligase activity;GO:0005096//GTPase activator activity;GO:0005524//ATP binding	GO:0006425//glutaminyl-tRNA aminoacylation;GO:0006429//leucyl-tRNA aminoacylation;GO:0008361//regulation of cell size;GO:0032008//positive regulation of TOR signaling;GO:0034198//cellular response to amino acid starvation;GO:0043547//positive regulation of GTPase activity;GO:0071230//cellular response to amino acid stimulus;GO:0071233//cellular response to leucine;GO:1904263//positive regulation …
Sfur001418	35.367	3.503	4.413	AAEL008004	Elongation of very long chain fatty acids protein AAEL008004	Metabolism;Metabolism;Metabolism;Metabolism	Global and overview maps;Global and overview maps;Lipid metabolism;Lipid metabolism	ko01100//Metabolic pathways;ko01212//Fatty acid metabolism;ko01040//Biosynthesis of unsaturated fatty acids;ko00062//Fatty acid elongation	K10250;K10250;K10250;K10250	GO:0030176//integral component of endoplasmic reticulum membrane	-	GO:0006633//fatty acid biosynthetic process
Sfur001421	133.817	39.05	34.967	SSR3	Translocon-associated protein subunit gamma	Genetic Information Processing	Folding, sorting and degradation	ko04141//Protein processing in endoplasmic reticulum	K13251	GO:0005783//endoplasmic reticulum;GO:0005789//endoplasmic reticulum membrane;GO:0016021//integral component of membrane	-	GO:0006614//SRP-dependent cotranslational protein targeting to membrane
Sfur001430	10.12	5.08	5.01	Chml	Rab proteins geranylgeranyltransferase component A 2	-	-	-	-	GO:0005634//nucleus;GO:0005654//nucleoplasm;GO:0005737//cytoplasm;GO:0005829//cytosol;GO:0005968//Rab-protein geranylgeranyltransferase complex	GO:0005092//GDP-dissociation inhibitor activity;GO:0005096//GTPase activator activity;GO:0017137//Rab GTPase binding	GO:0006886//intracellular protein transport;GO:0007264//small GTPase mediated signal transduction;GO:0016192//vesicle-mediated transport;GO:0018344//protein geranylgeranylation
Sfur001438	30.233	15.68	12.767	SF3A2	Splicing factor 3A subunit 2	Genetic Information Processing	Transcription	ko03040//Spliceosome	K12826	GO:0005634//nucleus;GO:0005654//nucleoplasm;GO:0005681//spliceosomal complex;GO:0005686//U2 snRNP;GO:0016607//nuclear speck;GO:0071004//U2-type prespliceosome;GO:0071005//U2-type precatalytic spliceosome;GO:0071013//catalytic step 2 spliceosome	GO:0003723//RNA binding;GO:0008270//zinc ion binding	GO:0000245//spliceosomal complex assembly;GO:0000389//mRNA 3'-splice site recognition;GO:0000398//mRNA splicing, via spliceosome;GO:0006397//mRNA processing;GO:0010976//positive regulation of neuron projection development;GO:1903241//U2-type prespliceosome assembly
Sfur001468	8.123	3.08	2.457	ELOVL4	Elongation of very long chain fatty acids protein 4	Metabolism;Metabolism;Metabolism;Metabolism	Global and overview maps;Global and overview maps;Lipid metabolism;Lipid metabolism	ko01100//Metabolic pathways;ko01212//Fatty acid metabolism;ko01040//Biosynthesis of unsaturated fatty acids;ko00062//Fatty acid elongation	K10249;K10249;K10249;K10249	GO:0005783//endoplasmic reticulum;GO:0030176//integral component of endoplasmic reticulum membrane	GO:0008020//G-protein coupled photoreceptor activity;GO:0009922//fatty acid elongase activity	GO:0006633//fatty acid biosynthetic process;GO:0006636//unsaturated fatty acid biosynthetic process;GO:0019367//fatty acid elongation, saturated fatty acid;GO:0030148//sphingolipid biosynthetic process;GO:0034625//fatty acid elongation, monounsaturated fatty acid;GO:0034626//fatty acid elongation, polyunsaturated fatty acid;GO:0035338//long-chain fatty-acyl-CoA biosynthetic process;GO:0042761//ve…
Sfur001475	11.323	5.453	6.127	Est-6	Venom carboxylesterase-6	Metabolism	Metabolism of terpenoids and polyketides	ko00981//Insect hormone biosynthesis	K01063	GO:0005576//extracellular region	GO:0080030//methyl indole-3-acetate esterase activity	-
Sfur001479	8.467	4.507	3.877	Top3beta	DNA topoisomerase 3-beta	Genetic Information Processing;Genetic Information Processing	Replication and repair;Replication and repair	ko03460//Fanconi anemia pathway;ko03440//Homologous recombination	K03165;K03165	GO:0005634//nucleus	GO:0003677//DNA binding;GO:0003916//DNA topoisomerase activity;GO:0003917//DNA topoisomerase type I activity	GO:0006265//DNA topological change;GO:0051965//positive regulation of synapse assembly
Sfur001506	12.93	5.817	5.183	CG7185	Cleavage and polyadenylation specificity factor subunit 6	Genetic Information Processing	Translation	ko03015//mRNA surveillance pathway	K14398	GO:0005634//nucleus	GO:0003729//mRNA binding	GO:0000381//regulation of alternative mRNA splicing, via spliceosome;GO:0006397//mRNA processing;GO:0010508//positive regulation of autophagy;GO:0043484//regulation of RNA splicing
Sfur001515	5.663	3.063	2.74	API5	Apoptosis inhibitor 5	-	-	-	-	GO:0005634//nucleus;GO:0005737//cytoplasm	GO:0003723//RNA binding;GO:0017134//fibroblast growth factor binding	GO:0006915//apoptotic process;GO:0043066//negative regulation of apoptotic process
Sfur001516	7.6	3.73	4.04	--	Putative uncharacterized protein	-	-	-	-	-	-	-
Sfur001520	63.307	26.26	20.417	CHIA	Endochitinase	Metabolism;Metabolism	Global and overview maps;Carbohydrate metabolism	ko01100//Metabolic pathways;ko00520//Amino sugar and nucleotide sugar metabolism	K01183;K01183	GO:0005576//extracellular region	GO:0004568//chitinase activity;GO:0008061//chitin binding	GO:0000272//polysaccharide catabolic process;GO:0006032//chitin catabolic process
Sfur001521	92.947	49.77	45.867	CCT2	T-complex protein 1 subunit beta	-	-	-	-	GO:0002199//zona pellucida receptor complex;GO:0005832//chaperonin-containing T-complex;GO:0005874//microtubule;GO:0044297//cell body	GO:0005524//ATP binding;GO:0031625//ubiquitin protein ligase binding;GO:0044183//protein binding involved in protein folding;GO:0051082//unfolded protein binding	GO:0006457//protein folding;GO:0007339//binding of sperm to zona pellucida;GO:0032212//positive regulation of telomere maintenance via telomerase;GO:0050821//protein stabilization;GO:0051086//chaperone mediated protein folding independent of cofactor;GO:0051131//chaperone-mediated protein complex assembly;GO:0051973//positive regulation of telomerase activity;GO:0090666//scaRNA localization to Ca…
Sfur001530	23.503	10.567	14.437	--	Putative uncharacterized protein	Organismal Systems;Human Diseases;Cellular Processes;Environmental Information Processing;Environmental Information Processing;Organismal Systems;Organismal Systems	Environmental adaptation;Infectious diseases;Transport and catabolism;Signal transduction;Signal transduction;Aging;Aging	ko04714//Thermogenesis;ko05131//Shigellosis;ko04140//Autophagy - animal;ko04150//mTOR signaling pathway;ko04152//AMPK signaling pathway;ko04211//Longevity regulating pathway - mammal;ko04213//Longevity regulating pathway - multiple species	K16184;K16184;K16184;K16184;K16184;K16184;K16184	-	-	-
Sfur001531	49.397	24.563	22.647	COPB1	Coatomer subunit beta	-	-	-	-	GO:0000139//Golgi membrane;GO:0005829//cytosol;GO:0030126//COPI vesicle coat	GO:0005198//structural molecule activity	GO:0006886//intracellular protein transport;GO:0006888//ER to Golgi vesicle-mediated transport;GO:0006891//intra-Golgi vesicle-mediated transport
Sfur001536	8.19	4.32	4.077	Thoc2	THO complex subunit 2	Genetic Information Processing;Genetic Information Processing	Translation;Transcription	ko03013//RNA transport;ko03040//Spliceosome	K12879;K12879	GO:0000346//transcription export complex;GO:0000347//THO complex;GO:0000445//THO complex part of transcription export complex;GO:0000784//nuclear chromosome, telomeric region;GO:0005634//nucleus;GO:0016607//nuclear speck	GO:0003729//mRNA binding	GO:0000902//cell morphogenesis;GO:0001824//blastocyst development;GO:0006397//mRNA processing;GO:0006406//mRNA export from nucleus;GO:0008380//RNA splicing;GO:0010468//regulation of gene expression;GO:0010793//regulation of mRNA export from nucleus;GO:0010977//negative regulation of neuron projection development;GO:0016973//poly(A)+ mRNA export from nucleus;GO:0017145//stem cell division;GO:00467…
Sfur001541	3.087	1.49	1.45	rg	Neurobeachin	-	-	-	-	GO:0005737//cytoplasm;GO:0005829//cytosol;GO:0016020//membrane;GO:0016021//integral component of membrane;GO:0043025//neuronal cell body;GO:0043204//perikaryon	GO:0019901//protein kinase binding;GO:0051018//protein kinase A binding	GO:0007528//neuromuscular junction development;GO:0007614//short-term memory;GO:0008104//protein localization;GO:0008355//olfactory learning;GO:0016319//mushroom body development;GO:0042462//eye photoreceptor cell development;GO:0042675//compound eye cone cell differentiation
Sfur001545	15.447	7.933	7.4	msps	Protein mini spindles	-	-	-	-	GO:0000776//kinetochore;GO:0000922//spindle pole;GO:0005737//cytoplasm;GO:0005813//centrosome;GO:0035371//microtubule plus-end	GO:0008017//microtubule binding;GO:0015631//tubulin binding	GO:0000022//mitotic spindle elongation;GO:0000132//establishment of mitotic spindle orientation;GO:0000278//mitotic cell cycle;GO:0007029//endoplasmic reticulum organization;GO:0007052//mitotic spindle organization;GO:0007143//female meiotic division;GO:0007344//pronuclear fusion;GO:0007411//axon guidance;GO:0016325//oocyte microtubule cytoskeleton organization;GO:0030951//establishment or mainte…
Sfur001550	3.973	1.923	1.963	--	Putative uncharacterized protein	-	-	-	-	-	-	-
Sfur001563	3.33	1.45	1.147	GAS2L3	Growth arrest-specific protein 2	-	-	-	-	GO:0005737//cytoplasm;GO:0005874//microtubule;GO:0005884//actin filament;GO:0016020//membrane	GO:0008017//microtubule binding;GO:0008093//cytoskeletal adaptor activity;GO:0051015//actin filament binding	GO:0000226//microtubule cytoskeleton organization;GO:0001544//initiation of primordial ovarian follicle growth;GO:0001547//antral ovarian follicle growth;GO:0006915//apoptotic process;GO:0007050//cell cycle arrest;GO:0008360//regulation of cell shape;GO:0008593//regulation of Notch signaling pathway;GO:0030728//ovulation;GO:0051764//actin crosslink formation;GO:0071711//basement membrane organiza…
Sfur001569	2.39	1.143	1.23	Cramp1	Protein cramped-like	-	-	-	-	GO:0005634//nucleus	GO:0003677//DNA binding;GO:0003682//chromatin binding	-
Sfur001572	2.817	1.167	1.483	tsl	Torso-like protein	Environmental Information Processing	Signal transduction	ko04013//MAPK signaling pathway - fly	K12377	GO:0005615//extracellular space	GO:0005122//torso binding;GO:0030546//receptor activator activity	GO:0007278//pole cell fate determination;GO:0007281//germ cell development;GO:0007362//terminal region determination;GO:0008293//torso signaling pathway;GO:0008358//maternal determination of anterior/posterior axis, embryo;GO:0009880//embryonic pattern specification;GO:0035073//pupariation;GO:0040018//positive regulation of multicellular organism growth
Sfur001588	3.403	1.627	1.497	rg	Neurobeachin	-	-	-	-	GO:0005737//cytoplasm;GO:0005829//cytosol;GO:0016020//membrane;GO:0016021//integral component of membrane;GO:0043025//neuronal cell body;GO:0043204//perikaryon	GO:0019901//protein kinase binding;GO:0051018//protein kinase A binding	GO:0007528//neuromuscular junction development;GO:0007614//short-term memory;GO:0008104//protein localization;GO:0008355//olfactory learning;GO:0016319//mushroom body development;GO:0042462//eye photoreceptor cell development;GO:0042675//compound eye cone cell differentiation
Sfur001608	15.267	6.663	8.32	rg	Neurobeachin	-	-	-	-	GO:0005737//cytoplasm;GO:0005829//cytosol;GO:0016020//membrane;GO:0016021//integral component of membrane;GO:0043025//neuronal cell body;GO:0043204//perikaryon	GO:0019901//protein kinase binding;GO:0051018//protein kinase A binding	GO:0007528//neuromuscular junction development;GO:0007614//short-term memory;GO:0008104//protein localization;GO:0008355//olfactory learning;GO:0016319//mushroom body development;GO:0042462//eye photoreceptor cell development;GO:0042675//compound eye cone cell differentiation
Sfur001614	10.993	1.953	1.763	Cyp49a1	Probable cytochrome P450 49a1	-	-	-	-	GO:0005789//endoplasmic reticulum membrane	GO:0004497//monooxygenase activity;GO:0005506//iron ion binding;GO:0016705//oxidoreductase activity, acting on paired donors, with incorporation or reduction of molecular oxygen;GO:0020037//heme binding	-
Sfur001616	1.007	0.13	0.063	--	Putative uncharacterized protein	-	-	-	-	-	-	-
Sfur001629	7.98	2.88	2.937	--	LIRP	Human Diseases;Cellular Processes;Human Diseases;Environmental Information Processing;Cellular Processes;Environmental Information Processing;Environmental Information Processing;Environmental Information Processing;Organismal Systems;Environmental Information Processing;Environmental Information Processing;Cellular Processes;Environmental Information Processing;Human Diseases;Environmental Infor…	Neurodegenerative diseases;Transport and catabolism;Endocrine and metabolic diseases;Signal transduction;Cell motility;Signal transduction;Signal transduction;Signal transduction;Endocrine system;Signal transduction;Signal transduction;Cell growth and death;Signal transduction;Endocrine and metabolic diseases;Signal transduction;Signal transduction;Endocrine system;Aging;Signal transduction;Endoc…	ko05010//Alzheimer disease;ko04140//Autophagy - animal;ko04932//Non-alcoholic fatty liver disease (NAFLD);ko04151//PI3K-Akt signaling pathway;ko04810//Regulation of actin cytoskeleton;ko04015//Rap1 signaling pathway;ko04022//cGMP - PKG signaling pathway;ko04010//MAPK signaling pathway;ko04910//Insulin signaling pathway;ko04014//Ras signaling pathway;ko04150//mTOR signaling pathway;ko04114//Oocyte…	K04526;K04526;K04526;K04526;K04526;K04526;K04526;K04526;K04526;K04526;K04526;K04526;K04526;K04526;K04526;K04526;K04526;K04526;K04526;K04526;K04526;K04526;K04526;K04526;K04526;K04526;K04526;K04526;K04526	GO:0005576//extracellular region	GO:0005179//hormone activity	-
Sfur001643	41.503	13.01	14.16	NAGA	Alpha-N-acetylgalactosaminidase	Metabolism;Cellular Processes;Metabolism;Metabolism;Metabolism;Metabolism	Global and overview maps;Transport and catabolism;Lipid metabolism;Carbohydrate metabolism;Lipid metabolism;Glycan biosynthesis and metabolism	ko01100//Metabolic pathways;ko04142//Lysosome;ko00561//Glycerolipid metabolism;ko00052//Galactose metabolism;ko00600//Sphingolipid metabolism;ko00603//Glycosphingolipid biosynthesis - globo and isoglobo series	K01189;K01189;K01189;K01189;K01189;K01189	GO:0005737//cytoplasm;GO:0005764//lysosome	GO:0004557//alpha-galactosidase activity;GO:0008456//alpha-N-acetylgalactosaminidase activity	GO:0009311//oligosaccharide metabolic process;GO:0016139//glycoside catabolic process;GO:0046477//glycosylceramide catabolic process
Sfur001650	45.043	7.447	8.2	Oscillin	Glucosamine-6-phosphate isomerase	Metabolism;Metabolism	Global and overview maps;Carbohydrate metabolism	ko01100//Metabolic pathways;ko00520//Amino sugar and nucleotide sugar metabolism	K02564;K02564	GO:0005737//cytoplasm	GO:0004342//glucosamine-6-phosphate deaminase activity;GO:0042802//identical protein binding	GO:0005975//carbohydrate metabolic process;GO:0006043//glucosamine catabolic process;GO:0006044//N-acetylglucosamine metabolic process;GO:0006046//N-acetylglucosamine catabolic process;GO:0006048//UDP-N-acetylglucosamine biosynthetic process;GO:0006091//generation of precursor metabolites and energy;GO:0019262//N-acetylneuraminate catabolic process
Sfur001652	32.097	14.417	18.03	alpha-Spec	Spectrin alpha chain	Cellular Processes	Cell growth and death	ko04210//Apoptosis	K06114	GO:0005794//Golgi apparatus;GO:0005856//cytoskeleton;GO:0005886//plasma membrane;GO:0005938//cell cortex;GO:0016323//basolateral plasma membrane;GO:0016324//apical plasma membrane;GO:0016328//lateral plasma membrane;GO:0031594//neuromuscular junction;GO:0045169//fusome;GO:0045170//spectrosome	GO:0003779//actin binding;GO:0005509//calcium ion binding;GO:0005516//calmodulin binding;GO:0008017//microtubule binding	GO:0007009//plasma membrane organization;GO:0007026//negative regulation of microtubule depolymerization;GO:0007274//neuromuscular synaptic transmission;GO:0007294//germarium-derived oocyte fate determination;GO:0007308//oocyte construction;GO:0007417//central nervous system development;GO:0008360//regulation of cell shape;GO:0016199//axon midline choice point recognition;GO:0030727//germarium-de…
Sfur001670	60.67	24.11	22.37	fdl	Chitooligosaccharidolytic beta-N-acetylglucosaminidase	Metabolism;Cellular Processes;Metabolism;Metabolism;Metabolism;Metabolism;Metabolism;Metabolism	Global and overview maps;Transport and catabolism;Carbohydrate metabolism;Glycan biosynthesis and metabolism;Glycan biosynthesis and metabolism;Glycan biosynthesis and metabolism;Glycan biosynthesis and metabolism;Glycan biosynthesis and metabolism	ko01100//Metabolic pathways;ko04142//Lysosome;ko00520//Amino sugar and nucleotide sugar metabolism;ko00513//Various types of N-glycan biosynthesis;ko00511//Other glycan degradation;ko00531//Glycosaminoglycan degradation;ko00603//Glycosphingolipid biosynthesis - globo and isoglobo series;ko00604//Glycosphingolipid biosynthesis - ganglio series	K12373;K12373;K12373;K12373;K12373;K12373;K12373;K12373	-	GO:0004563//beta-N-acetylhexosaminidase activity	GO:0000272//polysaccharide catabolic process;GO:0006032//chitin catabolic process
Sfur001672	8.437	1.12	1.073	LHCGR	Lutropin-choriogonadotropic hormone receptor	Environmental Information Processing	Signal transduction	ko04310//Wnt signaling pathway	K08399	GO:0005886//plasma membrane;GO:0005887//integral component of plasma membrane	GO:0004964//luteinizing hormone receptor activity;GO:0008528//G-protein coupled peptide receptor activity	GO:0001541//ovarian follicle development;GO:0007189//adenylate cyclase-activating G-protein coupled receptor signaling pathway;GO:0007190//activation of adenylate cyclase activity;GO:0007200//phospholipase C-activating G-protein coupled receptor signaling pathway;GO:0008584//male gonad development;GO:0009755//hormone-mediated signaling pathway;GO:0022602//ovulation cycle process;GO:0042700//lutei…
Sfur001674	5.517	2.587	2.02	mtSSB	Single-stranded DNA-binding protein, mitochondrial	Genetic Information Processing;Genetic Information Processing;Genetic Information Processing	Replication and repair;Replication and repair;Replication and repair	ko03030//DNA replication;ko03440//Homologous recombination;ko03430//Mismatch repair	K03111;K03111;K03111	GO:0000262//mitochondrial chromosome;GO:0005739//mitochondrion;GO:0009295//nucleoid;GO:0042645//mitochondrial nucleoid	GO:0003697//single-stranded DNA binding	GO:0000002//mitochondrial genome maintenance;GO:0006264//mitochondrial DNA replication;GO:0006268//DNA unwinding involved in DNA replication;GO:0051096//positive regulation of helicase activity;GO:0090297//positive regulation of mitochondrial DNA replication;GO:0090592//DNA synthesis involved in DNA replication;GO:1900264//positive regulation of DNA-directed DNA polymerase activity;GO:1902394//po…
Sfur001678	56.487	26.363	23.543	Kr-h2	Krueppel homolog 2	-	-	-	-	GO:0005783//endoplasmic reticulum;GO:0012505//endomembrane system;GO:0016021//integral component of membrane	-	GO:0061024//membrane organization;GO:0071786//endoplasmic reticulum tubular network organization
Sfur001681	113.757	39.983	41.42	Spase22-23	Signal peptidase complex subunit 3	Genetic Information Processing	Folding, sorting and degradation	ko03060//Protein export	K12948	GO:0005787//signal peptidase complex;GO:0016021//integral component of membrane	GO:0008233//peptidase activity	GO:0006465//signal peptide processing;GO:0045047//protein targeting to ER
Sfur001691	17.403	7.573	7.717	Pex16	Peroxisomal membrane protein PEX16	Cellular Processes	Transport and catabolism	ko04146//Peroxisome	K13335	GO:0005777//peroxisome;GO:0005778//peroxisomal membrane;GO:0005779//integral component of peroxisomal membrane;GO:0005783//endoplasmic reticulum;GO:0005789//endoplasmic reticulum membrane	GO:0008022//protein C-terminus binding	GO:0006625//protein targeting to peroxisome;GO:0007031//peroxisome organization;GO:0016557//peroxisome membrane biogenesis;GO:0016558//protein import into peroxisome matrix;GO:0022615//protein to membrane docking;GO:0032581//ER-dependent peroxisome organization;GO:0045046//protein import into peroxisome membrane
Sfur001698	1.72	0.6	0.703	--	Putative uncharacterized protein	Metabolism;Metabolism;Metabolism;Metabolism;Metabolism;Metabolism;Human Diseases;Metabolism;Metabolism;Metabolism	Global and overview maps;Xenobiotics biodegradation and metabolism;Metabolism of cofactors and vitamins;Carbohydrate metabolism;Carbohydrate metabolism;Metabolism of cofactors and vitamins;Cancers;Xenobiotics biodegradation and metabolism;Xenobiotics biodegradation and metabolism;Lipid metabolism	ko01100//Metabolic pathways;ko00983//Drug metabolism - other enzymes;ko00830//Retinol metabolism;ko00053//Ascorbate and aldarate metabolism;ko00040//Pentose and glucuronate interconversions;ko00860//Porphyrin and chlorophyll metabolism;ko05204//Chemical carcinogenesis;ko00980//Metabolism of xenobiotics by cytochrome P450;ko00982//Drug metabolism - cytochrome P450;ko00140//Steroid hormone biosynth…	K00699;K00699;K00699;K00699;K00699;K00699;K00699;K00699;K00699;K00699	-	-	-
Sfur001718	1.423	0.483	0.673	--	Putative uncharacterized protein	-	-	-	-	-	-	-
Sfur001727	18.907	8.627	8.403	CG2145	Poly(U)-specific endoribonuclease homolog	-	-	-	-	GO:0005576//extracellular region	GO:0003723//RNA binding;GO:0004521//endoribonuclease activity;GO:0046872//metal ion binding	GO:0090502//RNA phosphodiester bond hydrolysis, endonucleolytic
Sfur001770	15.98	8.363	7.71	--	Centrosomal protein of 131 kDa	-	-	-	-	GO:0000775//chromosome, centromeric region;GO:0005576//extracellular region;GO:0005929//cilium;GO:0034451//centriolar satellite	-	GO:0010824//regulation of centrosome duplication;GO:0030154//cell differentiation;GO:0032402//melanosome transport;GO:0035721//intraciliary retrograde transport;GO:0035735//intraciliary transport involved in cilium morphogenesis;GO:0050953//sensory perception of light stimulus;GO:0060271//cilium morphogenesis;GO:0060287//epithelial cilium movement involved in determination of left/right asymmetry…
Sfur001783	1.65	0.16	0.183	Sb	Serine proteinase stubble	-	-	-	-	GO:0005886//plasma membrane;GO:0016021//integral component of membrane	GO:0004252//serine-type endopeptidase activity	GO:0006508//proteolysis;GO:0007010//cytoskeleton organization;GO:0035220//wing disc development;GO:0051017//actin filament bundle assembly
Sfur001806	25.093	6.32	6.573	Slc16a10	Monocarboxylate transporter 10	Organismal Systems;Organismal Systems	Endocrine system;Digestive system	ko04919//Thyroid hormone signaling pathway;ko04974//Protein digestion and absorption	K08187;K08187	GO:0005887//integral component of plasma membrane;GO:0016021//integral component of membrane;GO:0016323//basolateral plasma membrane	GO:0015173//aromatic amino acid transmembrane transporter activity;GO:0015349//thyroid hormone transmembrane transporter activity	GO:0006590//thyroid hormone generation;GO:0070327//thyroid hormone transport;GO:0070460//thyroid-stimulating hormone secretion
Sfur001817	4.827	0.413	0.343	--	Putative uncharacterized protein	-	-	-	-	-	-	-
Sfur001825	6.583	2.647	2.517	--	Condensin complex subunit 3	-	-	-	-	GO:0000796//condensin complex;GO:0005634//nucleus;GO:0005829//cytosol	-	GO:0007076//mitotic chromosome condensation;GO:0051301//cell division
Sfur001830	9.487	3.19	2.72	LUBEL	E3 ubiquitin-protein ligase lubel	Human Diseases;Organismal Systems;Cellular Processes	Infectious diseases;Immune system;Cell growth and death	ko05131//Shigellosis;ko04621//NOD-like receptor signaling pathway;ko04217//Necroptosis	K11974;K11974;K11974	GO:0071797//LUBAC complex	GO:0004842//ubiquitin-protein transferase activity;GO:0008270//zinc ion binding;GO:0036435//K48-linked polyubiquitin binding;GO:0061630//ubiquitin protein ligase activity;GO:0070530//K63-linked polyubiquitin binding;GO:1990450//linear polyubiquitin binding	GO:0000209//protein polyubiquitination;GO:0002376//immune system process;GO:0010286//heat acclimation;GO:0050829//defense response to Gram-negative bacterium;GO:0061059//positive regulation of peptidoglycan recognition protein signaling pathway;GO:0097039//protein linear polyubiquitination
Sfur001843	1.367	0.283	0.387	--	Putative uncharacterized protein	-	-	-	-	-	-	-
Sfur001848	21.733	10.73	11.37	ASNS	Asparagine synthetase [glutamine-hydrolyzing]	Metabolism;Metabolism;Metabolism	Global and overview maps;Global and overview maps;Amino acid metabolism	ko01100//Metabolic pathways;ko01230//Biosynthesis of amino acids;ko00250//Alanine, aspartate and glutamate metabolism	K01953;K01953;K01953	GO:0005829//cytosol	GO:0004066//asparagine synthase (glutamine-hydrolyzing) activity;GO:0005524//ATP binding	GO:0006529//asparagine biosynthetic process;GO:0006541//glutamine metabolic process;GO:0070981//L-asparagine biosynthetic process
Sfur001859	6.597	3.117	3.15	Fam98a	Protein FAM98A	-	-	-	-	GO:0072669//tRNA-splicing ligase complex	GO:0008276//protein methyltransferase activity	GO:0006479//protein methylation;GO:0008284//positive regulation of cell proliferation;GO:0010628//positive regulation of gene expression;GO:0032418//lysosome localization;GO:1900029//positive regulation of ruffle assembly
Sfur001869	181.317	78.397	63.4	Act5C	Actin-5C	Organismal Systems;Human Diseases;Human Diseases;Cellular Processes;Environmental Information Processing;Cellular Processes;Human Diseases;Cellular Processes;Cellular Processes;Organismal Systems;Organismal Systems;Human Diseases;Human Diseases;Organismal Systems;Human Diseases;Environmental Information Processing;Environmental Information Processing;Human Diseases;Cellular Processes;Human Diseas…	Environmental adaptation;Infectious diseases;Infectious diseases;Cell motility;Signal transduction;Cellular community - eukaryotes;Cancers;Transport and catabolism;Cellular community - eukaryotes;Endocrine system;Endocrine system;Infectious diseases;Cardiovascular diseases;Immune system;Cardiovascular diseases;Signal transduction;Signal transduction;Cancers;Cell growth and death;Infectious diseas…	ko04714//Thermogenesis;ko05131//Shigellosis;ko05132//Salmonella infection;ko04810//Regulation of actin cytoskeleton;ko04015//Rap1 signaling pathway;ko04510//Focal adhesion;ko05205//Proteoglycans in cancer;ko04145//Phagosome;ko04530//Tight junction;ko04921//Oxytocin signaling pathway;ko04919//Thyroid hormone signaling pathway;ko05130//Pathogenic Escherichia coli infection;ko05414//Dilated cardiomy…	K05692;K05692;K05692;K05692;K05692;K05692;K05692;K05692;K05692;K05692;K05692;K05692;K05692;K05692;K05692;K05692;K05692;K05692;K05692;K05692;K05692;K05692;K05692;K05692;K05692;K05692;K05692;K05692;K05692;K05692	GO:0005737//cytoplasm;GO:0005856//cytoskeleton;GO:0031011//Ino80 complex;GO:0035060//brahma complex	GO:0005524//ATP binding	GO:0000281//mitotic cytokinesis;GO:0006338//chromatin remodeling;GO:0007291//sperm individualization;GO:0032507//maintenance of protein location in cell;GO:0035148//tube formation
Sfur001898	15.56	7.69	10.093	Gabbr1	Gamma-aminobutyric acid type B receptor subunit 1	Environmental Information Processing;Environmental Information Processing;Organismal Systems;Organismal Systems;Human Diseases;Organismal Systems;Organismal Systems	Signal transduction;Signaling molecules and interaction;Endocrine system;Nervous system;Substance dependence;Endocrine system;Sensory system	ko04024//cAMP signaling pathway;ko04080//Neuroactive ligand-receptor interaction;ko04915//Estrogen signaling pathway;ko04727//GABAergic synapse;ko05032//Morphine addiction;ko04929//GnRH secretion;ko04742//Taste transduction	K04615;K04615;K04615;K04615;K04615;K04615;K04615	GO:0005615//extracellular space;GO:0005737//cytoplasm;GO:0005789//endoplasmic reticulum membrane;GO:0005887//integral component of plasma membrane;GO:0008021//synaptic vesicle;GO:0016020//membrane;GO:0030673//axolemma;GO:0031966//mitochondrial membrane;GO:0038037//G-protein coupled receptor dimeric complex;GO:0038039//G-protein coupled receptor heterodimeric complex;GO:0042734//presynaptic membra…	GO:0004888//transmembrane signaling receptor activity;GO:0004965//G-protein coupled GABA receptor activity;GO:0008134//transcription factor binding;GO:0046982//protein heterodimerization activity;GO:0099579//G-protein coupled neurotransmitter receptor activity involved in regulation of postsynaptic membrane potential;GO:1990430//extracellular matrix protein binding	GO:0001649//osteoblast differentiation;GO:0007193//adenylate cyclase-inhibiting G-protein coupled receptor signaling pathway;GO:0007194//negative regulation of adenylate cyclase activity;GO:0007214//gamma-aminobutyric acid signaling pathway;GO:0008285//negative regulation of cell proliferation;GO:0014048//regulation of glutamate secretion;GO:0014049//positive regulation of glutamate secretion;GO:…
Sfur001901	51.33	21.483	23.643	DDX60	Probable ATP-dependent RNA helicase DDX60	-	-	-	-	GO:0005737//cytoplasm;GO:0005829//cytosol;GO:0045111//intermediate filament cytoskeleton	GO:0003690//double-stranded DNA binding;GO:0003724//RNA helicase activity;GO:0003725//double-stranded RNA binding;GO:0003727//single-stranded RNA binding;GO:0005524//ATP binding	GO:0009615//response to virus;GO:0045087//innate immune response;GO:0051607//defense response to virus;GO:1900245//positive regulation of MDA-5 signaling pathway;GO:1900246//positive regulation of RIG-I signaling pathway
Sfur001906	28.24	9.427	10.19	ARFGEF1	Brefeldin A-inhibited guanine nucleotide-exchange protein 1	Cellular Processes	Transport and catabolism	ko04144//Endocytosis	K18442	GO:0000139//Golgi membrane;GO:0005654//nucleoplasm;GO:0005730//nucleolus;GO:0005794//Golgi apparatus;GO:0005802//trans-Golgi network;GO:0005829//cytosol;GO:0016363//nuclear matrix;GO:0030532//small nuclear ribonucleoprotein complex;GO:0048471//perinuclear region of cytoplasm	GO:0005085//guanyl-nucleotide exchange factor activity;GO:0005086//ARF guanyl-nucleotide exchange factor activity;GO:0017022//myosin binding;GO:0034237//protein kinase A regulatory subunit binding	GO:0006887//exocytosis;GO:0007030//Golgi organization;GO:0010256//endomembrane system organization;GO:0015031//protein transport;GO:0030837//negative regulation of actin filament polymerization;GO:0031175//neuron projection development;GO:0032012//regulation of ARF protein signal transduction;GO:0034260//negative regulation of GTPase activity;GO:0043547//positive regulation of GTPase activity;GO:…
Sfur001911	94.66	32.507	31.64	COLEC12	Brevican core protein	Human Diseases;Organismal Systems	Infectious diseases;Immune system	ko05152//Tuberculosis;ko04625//C-type lectin receptor signaling pathway	K10059;K10059	GO:0005576//extracellular region	GO:0005540//hyaluronic acid binding;GO:0030246//carbohydrate binding	GO:0007155//cell adhesion
Sfur001919	5.19	0.973	0.83	SOX9	Transcription factor Sox-9-A	Environmental Information Processing	Signal transduction	ko04024//cAMP signaling pathway	K18435	GO:0005634//nucleus;GO:0005737//cytoplasm	GO:0000981//RNA polymerase II transcription factor activity, sequence-specific DNA binding;GO:0003677//DNA binding;GO:0043565//sequence-specific DNA binding;GO:0044389//ubiquitin-like protein ligase binding	GO:0002062//chondrocyte differentiation;GO:0003430//growth plate cartilage chondrocyte growth;GO:0007506//gonadal mesoderm development;GO:0014029//neural crest formation;GO:0043049//otic placode formation;GO:0045668//negative regulation of osteoblast differentiation;GO:0045893//positive regulation of transcription, DNA-templated;GO:0045944//positive regulation of transcription from RNA polymerase…
Sfur001924	2.163	0.573	0.57	--	Putative uncharacterized protein	-	-	-	-	-	-	-
Sfur001926	7.097	1.65	1.85	hum-6	Myosin-I heavy chain	Environmental Information Processing	Signal transduction	ko04391//Hippo signaling pathway -fly	K16677	GO:0001891//phagocytic cup;GO:0005737//cytoplasm;GO:0005829//cytosol;GO:0015629//actin cytoskeleton;GO:0016020//membrane;GO:0016459//myosin complex;GO:0030175//filopodium;GO:0031252//cell leading edge;GO:0031982//vesicle;GO:0032433//filopodium tip	GO:0000146//microfilament motor activity;GO:0003774//motor activity;GO:0003779//actin binding;GO:0005524//ATP binding;GO:0008017//microtubule binding;GO:0030898//actin-dependent ATPase activity;GO:0043621//protein self-association;GO:0051015//actin filament binding	GO:0000902//cell morphogenesis;GO:0006909//phagocytosis;GO:0007015//actin filament organization;GO:0009847//spore germination;GO:0030048//actin filament-based movement;GO:0030050//vesicle transport along actin filament;GO:0031589//cell-substrate adhesion;GO:0046847//filopodium assembly
Sfur001927	3.86	1.91	1.757	bud32	EKC/KEOPS complex subunit bud32	-	-	-	-	GO:0000408//EKC/KEOPS complex;GO:0005634//nucleus	GO:0004674//protein serine/threonine kinase activity;GO:0005524//ATP binding;GO:0016787//hydrolase activity	GO:0006468//protein phosphorylation;GO:0008033//tRNA processing;GO:0070525//tRNA threonylcarbamoyladenosine metabolic process
Sfur001931	31.82	11.12	10.197	Pgant7	N-acetylgalactosaminyltransferase 7	Metabolism;Metabolism;Metabolism	Global and overview maps;Glycan biosynthesis and metabolism;Glycan biosynthesis and metabolism	ko01100//Metabolic pathways;ko00514//Other types of O-glycan biosynthesis;ko00512//Mucin type O-glycan biosynthesis	K00710;K00710;K00710	GO:0000139//Golgi membrane;GO:0005794//Golgi apparatus;GO:0005795//Golgi stack;GO:0012505//endomembrane system;GO:0016021//integral component of membrane	GO:0004653//polypeptide N-acetylgalactosaminyltransferase activity;GO:0030246//carbohydrate binding;GO:0046872//metal ion binding	GO:0006486//protein glycosylation;GO:0009312//oligosaccharide biosynthetic process
Sfur001964	2.523	0.593	0.933	--	Putative uncharacterized protein	Human Diseases	Infectious diseases	ko05168//Herpes simplex infection	K09228	-	-	-
Sfur001969	17.587	8.297	7.78	GRIK2	Glutamate receptor ionotropic, kainate 2	-	-	-	-	GO:0005886//plasma membrane;GO:0005887//integral component of plasma membrane;GO:0014069//postsynaptic density;GO:0032839//dendrite cytoplasm;GO:0032983//kainate selective glutamate receptor complex;GO:0042734//presynaptic membrane;GO:0043195//terminal bouton;GO:0043204//perikaryon;GO:0045211//postsynaptic membrane	GO:0005234//extracellular-glutamate-gated ion channel activity;GO:0008066//glutamate receptor activity;GO:0015276//ligand-gated ion channel activity;GO:0015277//kainate selective glutamate receptor activity;GO:0030165//PDZ domain binding;GO:0031624//ubiquitin conjugating enzyme binding;GO:0031625//ubiquitin protein ligase binding;GO:0038023//signaling receptor activity;GO:0042802//identical prote…	GO:0001662//behavioral fear response;GO:0006874//cellular calcium ion homeostasis;GO:0007215//glutamate receptor signaling pathway;GO:0007268//synaptic transmission;GO:0019228//neuronal action potential;GO:0035249//synaptic transmission, glutamatergic;GO:0043113//receptor clustering;GO:0043524//negative regulation of neuron apoptotic process;GO:0043525//positive regulation of neuron apoptotic pro…
Sfur001979	1.477	0.167	0.197	-	-	-	-	-	-	-	-	-
Sfur001985	9.177	3.347	4.07	fz2	Frizzled-2	Human Diseases;Human Diseases;Human Diseases;Environmental Information Processing;Human Diseases;Environmental Information Processing;Human Diseases;Environmental Information Processing;Human Diseases;Cellular Processes;Human Diseases;Human Diseases;Organismal Systems;Human Diseases	Neurodegenerative diseases;Cancers;Infectious diseases;Signal transduction;Cancers;Signal transduction;Endocrine and metabolic diseases;Signal transduction;Cancers;Cellular community - eukaryotes;Cancers;Cancers;Endocrine system;Cancers	ko05010//Alzheimer disease;ko05200//Pathways in cancer;ko05165//Human papillomavirus infection;ko04310//Wnt signaling pathway;ko05205//Proteoglycans in cancer;ko04150//mTOR signaling pathway;ko04934//Cushing syndrome;ko04390//Hippo signaling pathway;ko05225//Hepatocellular carcinoma;ko04550//Signaling pathways regulating pluripotency of stem cells;ko05226//Gastric cancer;ko05224//Breast cancer;ko…	K02375;K02375;K02375;K02375;K02375;K02375;K02375;K02375;K02375;K02375;K02375;K02375;K02375;K02375	GO:0005634//nucleus;GO:0005886//plasma membrane;GO:0005887//integral component of plasma membrane;GO:0016021//integral component of membrane	GO:0004888//transmembrane signaling receptor activity;GO:0004930//G-protein coupled receptor activity;GO:0017147//Wnt-protein binding;GO:0030165//PDZ domain binding;GO:0042802//identical protein binding;GO:0042813//Wnt-activated receptor activity	GO:0007367//segment polarity determination;GO:0007435//salivary gland morphogenesis;GO:0007494//midgut development;GO:0008045//motor neuron axon guidance;GO:0008585//female gonad development;GO:0008587//imaginal disc-derived wing margin morphogenesis;GO:0016055//Wnt signaling pathway;GO:0016201//synaptic target inhibition;GO:0016477//cell migration;GO:0031290//retinal ganglion cell axon guidance;…
Sfur001994	14.557	4.143	2.93	--	Fatty acyl-CoA reductase 1	Cellular Processes;Organismal Systems	Transport and catabolism;Aging	ko04146//Peroxisome;ko04212//Longevity regulating pathway - worm	K13356;K13356	GO:0005777//peroxisome;GO:0005779//integral component of peroxisomal membrane;GO:0043231//intracellular membrane-bounded organelle	GO:0080019//fatty-acyl-CoA reductase (alcohol-forming) activity	GO:0008611//ether lipid biosynthetic process;GO:0010025//wax biosynthetic process;GO:0035336//long-chain fatty-acyl-CoA metabolic process;GO:0046474//glycerophospholipid biosynthetic process
Sfur001996	1.853	0	0	--	Putative uncharacterized protein	-	-	-	-	-	-	-
Sfur001998	10.28	0.493	0.39	SLC25A19	Mitochondrial thiamine pyrophosphate carrier	-	-	-	-	GO:0005743//mitochondrial inner membrane;GO:0016021//integral component of membrane	GO:0005347//ATP transmembrane transporter activity	-
Sfur002002	20.25	6.187	7.753	--	Putative uncharacterized protein	Organismal Systems;Organismal Systems;Environmental Information Processing	Digestive system;Endocrine system;Signal transduction	ko04979//Cholesterol metabolism;ko04918//Thyroid hormone synthesis;ko04340//Hedgehog signaling pathway	K06233;K06233;K06233	-	-	-
Sfur002054	3.64	1.817	2.17	kni	Knirps-related protein	-	-	-	-	GO:0000790//nuclear chromatin	GO:0000978//RNA polymerase II core promoter proximal region sequence-specific DNA binding;GO:0004879//RNA polymerase II transcription factor activity, ligand-activated sequence-specific DNA binding;GO:0008270//zinc ion binding	GO:0006357//regulation of transcription from RNA polymerase II promoter;GO:0007088//regulation of mitotic nuclear division;GO:0007427//epithelial cell migration, open tracheal system;GO:0045892//negative regulation of transcription, DNA-templated
Sfur002064	55.097	25.57	26.97	selenbp1-a	Methanethiol oxidase	Metabolism;Metabolism	Global and overview maps;Energy metabolism	ko01100//Metabolic pathways;ko00920//Sulfur metabolism	K17285;K17285	GO:0005634//nucleus;GO:0005829//cytosol;GO:0016020//membrane	GO:0008430//selenium binding;GO:0018549//methanethiol oxidase activity	GO:0015031//protein transport
Sfur002072	21.66	8.77	7.887	Ppt1	Palmitoyl-protein thioesterase 1	Metabolism;Cellular Processes;Metabolism;Metabolism	Global and overview maps;Transport and catabolism;Global and overview maps;Lipid metabolism	ko01100//Metabolic pathways;ko04142//Lysosome;ko01212//Fatty acid metabolism;ko00062//Fatty acid elongation	K01074;K01074;K01074;K01074	GO:0005576//extracellular region;GO:0005615//extracellular space;GO:0005634//nucleus;GO:0005764//lysosome;GO:0005794//Golgi apparatus;GO:0005829//cytosol;GO:0008021//synaptic vesicle;GO:0030424//axon;GO:0030425//dendrite;GO:0043005//neuron projection;GO:0043025//neuronal cell body;GO:0043231//intracellular membrane-bounded organelle;GO:0045121//membrane raft;GO:0045202//synapse	GO:0008474//palmitoyl-(protein) hydrolase activity;GO:0016290//palmitoyl-CoA hydrolase activity;GO:0016790//thiolester hydrolase activity;GO:0035727//lysophosphatidic acid binding	GO:0002084//protein depalmitoylation;GO:0006898//receptor-mediated endocytosis;GO:0006907//pinocytosis;GO:0007040//lysosome organization;GO:0007042//lysosomal lumen acidification;GO:0007269//neurotransmitter secretion;GO:0007399//nervous system development;GO:0007420//brain development;GO:0007601//visual perception;GO:0007625//grooming behavior;GO:0008306//associative learning;GO:0008344//adult l…
Sfur002079	19.02	6.22	6.223	PPP1R9A	Neurabin-1	-	-	-	-	GO:0005737//cytoplasm;GO:0005829//cytosol;GO:0005856//cytoskeleton;GO:0014069//postsynaptic density;GO:0015629//actin cytoskeleton;GO:0030027//lamellipodium;GO:0030175//filopodium;GO:0030425//dendrite;GO:0030426//growth cone;GO:0030864//cortical actin cytoskeleton;GO:0031594//neuromuscular junction;GO:0043005//neuron projection;GO:0043025//neuronal cell body;GO:0043197//dendritic spine;GO:0044326…	GO:0008022//protein C-terminus binding;GO:0008157//protein phosphatase 1 binding;GO:0019901//protein kinase binding;GO:0019904//protein domain specific binding;GO:0042802//identical protein binding;GO:0044325//ion channel binding;GO:0044877//macromolecular complex binding;GO:0051015//actin filament binding;GO:0051020//GTPase binding	GO:0007015//actin filament organization;GO:0007568//aging;GO:0010976//positive regulation of neuron projection development;GO:0019722//calcium-mediated signaling;GO:0030833//regulation of actin filament polymerization;GO:0031175//neuron projection development;GO:0045860//positive regulation of protein kinase activity;GO:0048666//neuron development;GO:0050804//modulation of synaptic transmission;G…
Sfur002093	5.017	0.91	0.89	AGXT2	Alanine--glyoxylate aminotransferase 2, mitochondrial	Metabolism;Metabolism;Metabolism;Metabolism;Metabolism	Global and overview maps;Amino acid metabolism;Amino acid metabolism;Amino acid metabolism;Amino acid metabolism	ko01100//Metabolic pathways;ko00270//Cysteine and methionine metabolism;ko00280//Valine, leucine and isoleucine degradation;ko00250//Alanine, aspartate and glutamate metabolism;ko00260//Glycine, serine and threonine metabolism	K00827;K00827;K00827;K00827;K00827	GO:0005739//mitochondrion	GO:0008453//alanine-glyoxylate transaminase activity;GO:0030170//pyridoxal phosphate binding;GO:0047305//(R)-3-amino-2-methylpropionate-pyruvate transaminase activity	-
Sfur002105	32.167	10.783	11.717	--	Phospholipase A1 2	-	-	-	-	GO:0005576//extracellular region	GO:0004806//triglyceride lipase activity;GO:0008970//phosphatidylcholine 1-acylhydrolase activity;GO:0052739//phosphatidylserine 1-acylhydrolase activity;GO:0052740//1-acyl-2-lysophosphatidylserine acylhydrolase activity	GO:0016042//lipid catabolic process;GO:0044179//hemolysis in other organism
Sfur002128	4.327	1.973	2.45	Lar	Tyrosine-protein phosphatase Lar	Organismal Systems;Environmental Information Processing;Human Diseases;Cellular Processes	Endocrine system;Signaling molecules and interaction;Endocrine and metabolic diseases;Cellular community - eukaryotes	ko04910//Insulin signaling pathway;ko04514//Cell adhesion molecules (CAMs);ko04931//Insulin resistance;ko04520//Adherens junction	K05695;K05695;K05695;K05695	GO:0005925//focal adhesion;GO:0009925//basal plasma membrane;GO:0009986//cell surface;GO:0016021//integral component of membrane;GO:0030424//axon;GO:0031252//cell leading edge	GO:0004725//protein tyrosine phosphatase activity;GO:0005001//transmembrane receptor protein tyrosine phosphatase activity;GO:0005158//insulin receptor binding;GO:0008201//heparin binding;GO:0032093//SAM domain binding	GO:0006470//protein dephosphorylation;GO:0007155//cell adhesion;GO:0007283//spermatogenesis;GO:0007399//nervous system development;GO:0007411//axon guidance;GO:0007412//axon target recognition;GO:0008045//motor neuron axon guidance;GO:0008594//photoreceptor cell morphogenesis;GO:0031290//retinal ganglion cell axon guidance;GO:0035335//peptidyl-tyrosine dephosphorylation;GO:0045467//R7 cell develo…
Sfur002132	19.843	5.127	3.683	SSR1	Translocon-associated protein subunit alpha	Genetic Information Processing	Folding, sorting and degradation	ko04141//Protein processing in endoplasmic reticulum	K13249	GO:0005789//endoplasmic reticulum membrane;GO:0016021//integral component of membrane	-	-
Sfur002145	12.563	5.27	5.373	PPAF2	Phenoloxidase-activating factor 2	Organismal Systems	Immune system	ko04610//Complement and coagulation cascades	K01344	GO:0005576//extracellular region	GO:0004252//serine-type endopeptidase activity;GO:0046872//metal ion binding	GO:0045087//innate immune response
Sfur002158	8.077	4.023	4.637	dnm1l	Dynamin-1-like protein	Organismal Systems;Cellular Processes;Cellular Processes;Environmental Information Processing	Immune system;Cell growth and death;Cell growth and death;Signal transduction	ko04621//NOD-like receptor signaling pathway;ko04214//Apoptosis - fly;ko04217//Necroptosis;ko04668//TNF signaling pathway	K17065;K17065;K17065;K17065	GO:0005737//cytoplasm;GO:0005739//mitochondrion;GO:0005741//mitochondrial outer membrane;GO:0005777//peroxisome;GO:0005794//Golgi apparatus;GO:0005829//cytosol;GO:0005905//coated pit;GO:0016020//membrane;GO:0030672//synaptic vesicle membrane;GO:0031966//mitochondrial membrane	GO:0003924//GTPase activity;GO:0005525//GTP binding;GO:0008017//microtubule binding;GO:0008289//lipid binding;GO:0042803//protein homodimerization activity	GO:0000266//mitochondrial fission;GO:0003374//dynamin polymerization involved in mitochondrial fission;GO:0008637//apoptotic mitochondrial changes;GO:0010821//regulation of mitochondrion organization;GO:0016559//peroxisome fission;GO:0043653//mitochondrial fragmentation involved in apoptotic process;GO:0048285//organelle fission;GO:0048312//intracellular distribution of mitochondria;GO:0048511//r…
Sfur002167	23.123	6.48	6.453	TOP2	DNA topoisomerase 2	Human Diseases	Drug resistance	ko01524//Platinum drug resistance	K03164	GO:0005634//nucleus	GO:0003677//DNA binding;GO:0003918//DNA topoisomerase type II (ATP-hydrolyzing) activity;GO:0005524//ATP binding;GO:0046872//metal ion binding	GO:0006265//DNA topological change
Sfur002175	21.903	1.22	1.24	pip	Heparan sulfate 2-O-sulfotransferase pipe	Metabolism	Glycan biosynthesis and metabolism	ko00532//Glycosaminoglycan biosynthesis - chondroitin sulfate / dermatan sulfate	K03193	GO:0005634//nucleus;GO:0005694//chromosome;GO:0005794//Golgi apparatus;GO:0030173//integral component of Golgi membrane	GO:0008146//sulfotransferase activity	GO:0009880//embryonic pattern specification;GO:0009950//dorsal/ventral axis specification;GO:0040014//regulation of multicellular organism growth;GO:0045752//positive regulation of Toll signaling pathway;GO:1900005//positive regulation of serine-type endopeptidase activity
Sfur002188	21.633	7.613	5.61	PLBD2	Putative phospholipase B-like 2	-	-	-	-	GO:0005576//extracellular region;GO:0043202//lysosomal lumen	GO:0004620//phospholipase activity	GO:0009395//phospholipid catabolic process
Sfur002202	7.79	3.52	3.29	Src64B	Tyrosine-protein kinase Src64B	Human Diseases;Human Diseases;Cellular Processes;Cellular Processes;Environmental Information Processing;Environmental Information Processing;Cellular Processes;Human Diseases;Human Diseases;Cellular Processes;Organismal Systems;Organismal Systems;Organismal Systems;Human Diseases;Organismal Systems;Human Diseases;Human Diseases;Organismal Systems;Organismal Systems;Cellular Processes;Organismal …	Infectious diseases;Infectious diseases;Transport and catabolism;Cell motility;Signal transduction;Signal transduction;Cellular community - eukaryotes;Cancers;Cancers;Cellular community - eukaryotes;Endocrine system;Development;Endocrine system;Infectious diseases;Immune system;Infectious diseases;Infectious diseases;Endocrine system;Endocrine system;Cellular community - eukaryotes;Immune system;…	ko05168//Herpes simplex infection;ko05131//Shigellosis;ko04144//Endocytosis;ko04810//Regulation of actin cytoskeleton;ko04013//MAPK signaling pathway - fly;ko04015//Rap1 signaling pathway;ko04510//Focal adhesion;ko05205//Proteoglycans in cancer;ko05203//Viral carcinogenesis;ko04530//Tight junction;ko04921//Oxytocin signaling pathway;ko04360//Axon guidance;ko04919//Thyroid hormone signaling pathwa…	K05704;K05704;K05704;K05704;K05704;K05704;K05704;K05704;K05704;K05704;K05704;K05704;K05704;K05704;K05704;K05704;K05704;K05704;K05704;K05704;K05704;K05704;K05704;K05704;K05704;K05704;K05704;K05704;K05704;K05704;K05704;K05704;K05704;K05704;K05704;K05704;K05704;K05704	GO:0005829//cytosol;GO:0005886//plasma membrane;GO:0031234//extrinsic component of cytoplasmic side of plasma membrane;GO:0045172//germline ring canal	GO:0004715//non-membrane spanning protein tyrosine kinase activity;GO:0005102//receptor binding;GO:0005524//ATP binding	GO:0000185//activation of MAPKKK activity;GO:0007169//transmembrane receptor protein tyrosine kinase signaling pathway;GO:0007293//germarium-derived egg chamber formation;GO:0007300//ovarian nurse cell to oocyte transport;GO:0007301//female germline ring canal formation;GO:0007349//cellularization;GO:0007411//axon guidance;GO:0007424//open tracheal system development;GO:0007435//salivary gland mo…
Sfur002221	1.897	0.407	0.357	--	Putative uncharacterized protein	-	-	-	-	-	-	-
Sfur002256	1.623	0.19	0.343	--	Putative uncharacterized protein	-	-	-	-	-	-	-
Sfur002275	401.13	155.5	162.627	--	Putative uncharacterized protein	-	-	-	-	-	-	-
Sfur002283	5.507	1.837	2.01	CG14535	Kinesin-like protein CG14535	-	-	-	-	GO:0005737//cytoplasm;GO:0005871//kinesin complex;GO:0005874//microtubule	GO:0003777//microtubule motor activity;GO:0005524//ATP binding;GO:0008017//microtubule binding	-
Sfur002293	11.383	5.3	4.687	HNRNPM	Myelin expression factor 2	Genetic Information Processing	Transcription	ko03040//Spliceosome	K12887	GO:0005634//nucleus;GO:0005737//cytoplasm;GO:0071014//post-mRNA release spliceosomal complex;GO:1990904//ribonucleoprotein complex	GO:0003697//single-stranded DNA binding;GO:0003723//RNA binding;GO:0003729//mRNA binding	GO:0006357//regulation of transcription from RNA polymerase II promoter;GO:0014902//myotube differentiation;GO:0030182//neuron differentiation;GO:2000815//regulation of mRNA stability involved in response to oxidative stress
Sfur002300	54.353	4.7	4.5	nas-14	Zinc metalloproteinase nas-14	Human Diseases	Neurodegenerative disease	ko05017//Spinocerebellar ataxia	K19323	GO:0005576//extracellular region	GO:0004222//metalloendopeptidase activity;GO:0008270//zinc ion binding	-
Sfur002307	1.783	0.837	1.22	nub	POU domain, class 2, transcription factor 1	Human Diseases	Infectious diseases	ko05168//Herpes simplex infection	K09364	GO:0005634//nucleus	GO:0001223//transcription coactivator binding;GO:0001228//transcriptional activator activity, RNA polymerase II transcription regulatory region sequence-specific binding;GO:0003677//DNA binding	GO:0030154//cell differentiation;GO:0045944//positive regulation of transcription from RNA polymerase II promoter
Sfur002315	9.213	2.28	1.973	dpa	DNA replication licensing factor MCM4	Cellular Processes;Genetic Information Processing	Cell growth and death;Replication and repair	ko04110//Cell cycle;ko03030//DNA replication	K02212;K02212	GO:0005634//nucleus;GO:0042555//MCM complex;GO:0071162//CMG complex	GO:0003678//DNA helicase activity;GO:0003688//DNA replication origin binding;GO:0003697//single-stranded DNA binding;GO:0005524//ATP binding	GO:0000727//double-strand break repair via break-induced replication;GO:0006260//DNA replication;GO:0006267//pre-replicative complex assembly involved in nuclear cell cycle DNA replication;GO:0006268//DNA unwinding involved in DNA replication;GO:0006271//DNA strand elongation involved in DNA replication;GO:0007052//mitotic spindle organization;GO:1902975//mitotic DNA replication initiation
Sfur002318	1.29	0.603	0.58	Ift172	Intraflagellar transport protein 172 homolog	-	-	-	-	GO:0005634//nucleus;GO:0005929//cilium;GO:0005930//axoneme;GO:0030992//intraciliary transport particle B;GO:0031514//motile cilium;GO:0036064//ciliary basal body;GO:0097225//sperm midpiece;GO:0097228//sperm principal piece;GO:0097598//sperm cytoplasmic droplet	GO:0008134//transcription factor binding	GO:0000122//negative regulation of transcription from RNA polymerase II promoter;GO:0001841//neural tube formation;GO:0001843//neural tube closure;GO:0001947//heart looping;GO:0007219//Notch signaling pathway;GO:0007224//smoothened signaling pathway;GO:0007368//determination of left/right symmetry;GO:0007420//brain development;GO:0007507//heart development;GO:0008544//epidermis development;GO:000…
Sfur002336	3.007	1.247	1.277	ft	Cadherin-related tumor suppressor	Environmental Information Processing;Environmental Information Processing	Signal transduction;Signal transduction	ko04391//Hippo signaling pathway -fly;ko04392//Hippo signaling pathway - multiple species	K16669;K16669	GO:0005739//mitochondrion;GO:0005886//plasma membrane;GO:0005887//integral component of plasma membrane;GO:0016324//apical plasma membrane;GO:0016327//apicolateral plasma membrane	GO:0005509//calcium ion binding;GO:0045296//cadherin binding	GO:0001736//establishment of planar polarity;GO:0001737//establishment of imaginal disc-derived wing hair orientation;GO:0007156//homophilic cell adhesion via plasma membrane adhesion molecules;GO:0007157//heterophilic cell-cell adhesion via plasma membrane cell adhesion molecules;GO:0007164//establishment of tissue polarity;GO:0007446//imaginal disc growth;GO:0007447//imaginal disc pattern forma…
Sfur002340	2.02	0.96	1.05	TMTC4	Protein O-mannosyl-transferase TMTC4	-	-	-	-	GO:0005783//endoplasmic reticulum;GO:0016021//integral component of membrane	GO:0000030//mannosyltransferase activity;GO:0004169//dolichyl-phosphate-mannose-protein mannosyltransferase activity;GO:0051117//ATPase binding	GO:0007605//sensory perception of sound;GO:0030968//endoplasmic reticulum unfolded protein response;GO:0032470//positive regulation of endoplasmic reticulum calcium ion concentration;GO:0035269//protein O-linked mannosylation
Sfur002344	1.62	0.717	0.783	l(2)dtl	Denticleless protein homolog	-	-	-	-	GO:0005634//nucleus;GO:0005694//chromosome;GO:0005737//cytoplasm;GO:0005813//centrosome;GO:0031464//Cul4A-RING E3 ubiquitin ligase complex;GO:0031465//Cul4B-RING E3 ubiquitin ligase complex	-	GO:0000209//protein polyubiquitination;GO:0006260//DNA replication;GO:0006511//ubiquitin-dependent protein catabolic process;GO:0006513//protein monoubiquitination;GO:0006974//cellular response to DNA damage stimulus;GO:0007095//mitotic G2 DNA damage checkpoint;GO:0009411//response to UV;GO:0019985//translesion synthesis;GO:0048511//rhythmic process;GO:0051726//regulation of cell cycle;GO:0072425…
Sfur002358	6.293	2	1.643	Slc5a12	Sodium-coupled monocarboxylate transporter 2	-	-	-	-	GO:0016021//integral component of membrane;GO:0016324//apical plasma membrane	GO:0015129//lactate transmembrane transporter activity;GO:0015293//symporter activity	GO:0006814//sodium ion transport
Sfur002371	3.24	1.447	1.287	Gem	GTP-binding protein GEM	-	-	-	-	GO:0005634//nucleus;GO:0005886//plasma membrane;GO:0009898//cytoplasmic side of plasma membrane;GO:0030496//midbody;GO:0051233//spindle midzone;GO:0072686//mitotic spindle	GO:0000287//magnesium ion binding;GO:0003924//GTPase activity;GO:0005246//calcium channel regulator activity;GO:0005525//GTP binding;GO:0019003//GDP binding	GO:0000278//mitotic cell cycle;GO:0007165//signal transduction;GO:0051276//chromosome organization;GO:0051310//metaphase plate congression;GO:1901842//negative regulation of high voltage-gated calcium channel activity
Sfur002386	12.997	6.55	6.12	PPIE	Peptidyl-prolyl cis-trans isomerase E	Genetic Information Processing	Transcription	ko03040//Spliceosome	K09564	GO:0005634//nucleus;GO:0005737//cytoplasm;GO:0071007//U2-type catalytic step 2 spliceosome	GO:0003729//mRNA binding;GO:0003755//peptidyl-prolyl cis-trans isomerase activity;GO:0008143//poly(A) binding;GO:0016018//cyclosporin A binding	GO:0000398//mRNA splicing, via spliceosome;GO:0000413//protein peptidyl-prolyl isomerization;GO:0006457//protein folding
Sfur002398	9.203	3.557	4.103	ZFHX4	Zinc finger homeobox protein 3	Cellular Processes	Cellular community - eukaryotes	ko04550//Signaling pathways regulating pluripotency of stem cells	K09378	GO:0000790//nuclear chromatin;GO:0005634//nucleus;GO:0005654//nucleoplasm;GO:0005667//transcription factor complex;GO:0005737//cytoplasm;GO:0016604//nuclear body	GO:0000976//transcription regulatory region sequence-specific DNA binding;GO:0000978//RNA polymerase II core promoter proximal region sequence-specific DNA binding;GO:0000981//RNA polymerase II transcription factor activity, sequence-specific DNA binding;GO:0001227//transcriptional repressor activity, RNA polymerase II transcription regulatory region sequence-specific binding;GO:0003700//transcri…	GO:0000122//negative regulation of transcription from RNA polymerase II promoter;GO:0006355//regulation of transcription, DNA-templated;GO:0007050//cell cycle arrest;GO:0007420//brain development;GO:0007517//muscle organ development;GO:0032922//circadian regulation of gene expression;GO:0045662//negative regulation of myoblast differentiation;GO:0045663//positive regulation of myoblast differenti…
Sfur002402	6.753	0.86	0.647	--	Putative uncharacterized protein	-	-	-	-	-	-	-
Sfur002488	10.137	0.777	0.823	Elovl7	Elongation of very long chain fatty acids protein 7	Metabolism;Metabolism;Metabolism;Metabolism	Global and overview maps;Global and overview maps;Lipid metabolism;Lipid metabolism	ko01100//Metabolic pathways;ko01212//Fatty acid metabolism;ko01040//Biosynthesis of unsaturated fatty acids;ko00062//Fatty acid elongation	K10250;K10250;K10250;K10250	GO:0005783//endoplasmic reticulum;GO:0030176//integral component of endoplasmic reticulum membrane	GO:0009922//fatty acid elongase activity	GO:0006636//unsaturated fatty acid biosynthetic process;GO:0019367//fatty acid elongation, saturated fatty acid;GO:0030148//sphingolipid biosynthetic process;GO:0034625//fatty acid elongation, monounsaturated fatty acid;GO:0034626//fatty acid elongation, polyunsaturated fatty acid;GO:0035338//long-chain fatty-acyl-CoA biosynthetic process;GO:0042761//very long-chain fatty acid biosynthetic process
Sfur002494	7.563	3.35	4.24	--	Putative uncharacterized protein	Genetic Information Processing	Translation	ko03013//RNA transport	K14288	-	-	-
Sfur002533	2.377	0.84	0.877	--	Putative uncharacterized protein	-	-	-	-	-	-	-
Sfur002544	152.117	79.87	67.127	Psmb7	Proteasome subunit beta type-7	Genetic Information Processing	Folding, sorting and degradation	ko03050//Proteasome	K02739	GO:0000502//proteasome complex;GO:0005634//nucleus;GO:0005654//nucleoplasm;GO:0005737//cytoplasm;GO:0005829//cytosol;GO:0005839//proteasome core complex;GO:0019774//proteasome core complex, beta-subunit complex	GO:0004175//endopeptidase activity;GO:0004298//threonine-type endopeptidase activity	GO:0010498//proteasomal protein catabolic process;GO:0010499//proteasomal ubiquitin-independent protein catabolic process;GO:0043161//proteasome-mediated ubiquitin-dependent protein catabolic process
Sfur002550	7.54	3.99	3.287	--	Probable RNA-directed DNA polymerase from transposon BS	Organismal Systems	Sensory system	ko04745//Phototransduction - fly	K08834	-	GO:0003964//RNA-directed DNA polymerase activity	GO:0006313//transposition, DNA-mediated
Sfur002555	6.973	3.047	3.087	arpc1a-b	Actin-related protein 2/3 complex subunit 1A-B	Human Diseases;Cellular Processes;Human Diseases;Cellular Processes;Human Diseases;Human Diseases;Organismal Systems	Infectious diseases;Transport and catabolism;Infectious diseases;Cell motility;Infectious diseases;Infectious diseases;Immune system	ko05131//Shigellosis;ko04144//Endocytosis;ko05132//Salmonella infection;ko04810//Regulation of actin cytoskeleton;ko05130//Pathogenic Escherichia coli infection;ko05100//Bacterial invasion of epithelial cells;ko04666//Fc gamma R-mediated phagocytosis	K05757;K05757;K05757;K05757;K05757;K05757;K05757	GO:0005634//nucleus;GO:0005737//cytoplasm;GO:0005885//Arp2/3 protein complex;GO:0035861//site of double-strand break	GO:0003779//actin binding	GO:0034314//Arp2/3 complex-mediated actin nucleation
Sfur002558	302.307	95.81	84.56	Pdi	Protein disulfide-isomerase	Genetic Information Processing	Folding, sorting and degradation	ko04141//Protein processing in endoplasmic reticulum	K09580	GO:0005615//extracellular space;GO:0005635//nuclear envelope;GO:0005737//cytoplasm;GO:0005783//endoplasmic reticulum;GO:0005788//endoplasmic reticulum lumen;GO:0005791//rough endoplasmic reticulum;GO:0012505//endomembrane system;GO:0043025//neuronal cell body;GO:0045169//fusome;GO:0048471//perinuclear region of cytoplasm;GO:0060187//cell pole;GO:0070732//spindle envelope	GO:0003756//protein disulfide isomerase activity;GO:0015037//peptide disulfide oxidoreductase activity	-
Sfur002599	0.877	0.107	0.217	--	Craniofacial development protein 2	-	-	-	-	GO:0005634//nucleus;GO:0005737//cytoplasm	-	-
Sfur002601	32.14	11.783	10.543	RnrS	Ribonucleoside-diphosphate reductase subunit M2	Metabolism;Metabolism;Metabolism;Metabolism;Metabolism;Cellular Processes	Global and overview maps;Nucleotide metabolism;Xenobiotics biodegradation and metabolism;Metabolism of other amino acids;Nucleotide metabolism;Cell growth and death	ko01100//Metabolic pathways;ko00230//Purine metabolism;ko00983//Drug metabolism - other enzymes;ko00480//Glutathione metabolism;ko00240//Pyrimidine metabolism;ko04115//p53 signaling pathway	K10808;K10808;K10808;K10808;K10808;K10808	GO:0005829//cytosol	GO:0004748//ribonucleoside-diphosphate reductase activity, thioredoxin disulfide as acceptor;GO:0046872//metal ion binding	GO:0006260//DNA replication;GO:0006919//activation of cysteine-type endopeptidase activity involved in apoptotic process;GO:0009263//deoxyribonucleotide biosynthetic process
Sfur002604	3.717	2.08	1.783	CCDC97	Coiled-coil domain-containing protein 97	Cellular Processes	Transport and catabolism	ko04144//Endocytosis	K18468	-	-	-
Sfur002609	8.913	4.097	5.323	SLC39A9	Zinc transporter ZIP9	-	-	-	-	GO:0016021//integral component of membrane	GO:0046873//metal ion transmembrane transporter activity	GO:0006829//zinc II ion transport
Sfur002619	5.16	2.417	2.763	--	snRNA-activating protein complex subunit 3	-	-	-	-	GO:0005634//nucleus;GO:0019185//snRNA-activating protein complex	GO:0001006//RNA polymerase III type 3 promoter sequence-specific DNA binding;GO:0003681//bent DNA binding	GO:0042795//snRNA transcription from RNA polymerase II promoter;GO:0042796//snRNA transcription from RNA polymerase III promoter
Sfur002631	4.017	2.04	1.933	Rpap2	RNA polymerase II subunit B1 CTD phosphatase Rpap2	-	-	-	-	GO:0005634//nucleus;GO:0005730//nucleolus;GO:0005737//cytoplasm;GO:0005829//cytosol;GO:0016591//DNA-directed RNA polymerase II, holoenzyme	GO:0004722//protein serine/threonine phosphatase activity;GO:0008420//CTD phosphatase activity;GO:0043175//RNA polymerase core enzyme binding;GO:0046872//metal ion binding	GO:0009301//snRNA transcription;GO:0070940//dephosphorylation of RNA polymerase II C-terminal domain
Sfur002645	7.29	2.903	2.8	APTX	Aprataxin	-	-	-	-	GO:0005634//nucleus;GO:0005654//nucleoplasm;GO:0005730//nucleolus	GO:0003697//single-stranded DNA binding;GO:0003725//double-stranded RNA binding;GO:0030983//mismatched DNA binding;GO:0033699//DNA 5'-adenosine monophosphate hydrolase activity;GO:0046872//metal ion binding;GO:1990165//single-strand break-containing DNA binding	GO:0000012//single strand break repair;GO:0006302//double-strand break repair
Sfur002652	36.887	17.407	20.75	--	Lysosomal-trafficking regulator	-	-	-	-	GO:0005829//cytosol;GO:0015630//microtubule cytoskeleton;GO:0016020//membrane	GO:0019901//protein kinase binding	GO:0002446//neutrophil mediated immunity;GO:0002456//T cell mediated immunity;GO:0006644//phospholipid metabolic process;GO:0006909//phagocytosis;GO:0007017//microtubule-based process;GO:0007040//lysosome organization;GO:0007596//blood coagulation;GO:0008104//protein localization;GO:0030595//leukocyte chemotaxis;GO:0032438//melanosome organization;GO:0032510//endosome to lysosome transport via mu…
Sfur002672	85.813	32.303	33.603	Lrp2	Low-density lipoprotein receptor-related protein 2	Organismal Systems;Organismal Systems;Environmental Information Processing	Digestive system;Endocrine system;Signal transduction	ko04979//Cholesterol metabolism;ko04918//Thyroid hormone synthesis;ko04340//Hedgehog signaling pathway	K06233;K06233;K06233	GO:0005615//extracellular space;GO:0005737//cytoplasm;GO:0005768//endosome;GO:0005783//endoplasmic reticulum;GO:0005794//Golgi apparatus;GO:0005886//plasma membrane;GO:0005903//brush border;GO:0005905//coated pit;GO:0009897//external side of plasma membrane;GO:0009986//cell surface;GO:0016020//membrane;GO:0016021//integral component of membrane;GO:0016324//apical plasma membrane;GO:0030139//endoc…	GO:0005509//calcium ion binding;GO:0008144//drug binding;GO:0017124//SH3 domain binding;GO:0030165//PDZ domain binding;GO:0030492//hemoglobin binding;GO:0031994//insulin-like growth factor I binding;GO:0035258//steroid hormone receptor binding;GO:0042562//hormone binding;GO:0044877//macromolecular complex binding;GO:0050750//low-density lipoprotein particle receptor binding;GO:0051087//chaperone …	GO:0001822//kidney development;GO:0001843//neural tube closure;GO:0003139//secondary heart field specification;GO:0003148//outflow tract septum morphogenesis;GO:0003223//ventricular compact myocardium morphogenesis;GO:0003281//ventricular septum development;GO:0006766//vitamin metabolic process;GO:0006897//endocytosis;GO:0006898//receptor-mediated endocytosis;GO:0007507//heart development;GO:0007…
Sfur002688	2.563	1.2	1.327	--	Putative uncharacterized protein	-	-	-	-	-	-	-
Sfur002703	13.503	2.74	2.913	--	Putative uncharacterized protein	-	-	-	-	-	-	-
Sfur002724	49.743	15.873	16.717	CalpC	Calpain-C	-	-	-	-	GO:0005737//cytoplasm	GO:0005509//calcium ion binding	GO:0006508//proteolysis
Sfur002767	3.773	1.587	1.31	Src64B	Tyrosine-protein kinase Src64B	Human Diseases;Human Diseases;Cellular Processes;Cellular Processes;Environmental Information Processing;Environmental Information Processing;Cellular Processes;Human Diseases;Human Diseases;Cellular Processes;Organismal Systems;Organismal Systems;Organismal Systems;Human Diseases;Organismal Systems;Human Diseases;Human Diseases;Organismal Systems;Organismal Systems;Cellular Processes;Organismal …	Infectious diseases;Infectious diseases;Transport and catabolism;Cell motility;Signal transduction;Signal transduction;Cellular community - eukaryotes;Cancers;Cancers;Cellular community - eukaryotes;Endocrine system;Development;Endocrine system;Infectious diseases;Immune system;Infectious diseases;Infectious diseases;Endocrine system;Endocrine system;Cellular community - eukaryotes;Immune system;…	ko05168//Herpes simplex infection;ko05131//Shigellosis;ko04144//Endocytosis;ko04810//Regulation of actin cytoskeleton;ko04013//MAPK signaling pathway - fly;ko04015//Rap1 signaling pathway;ko04510//Focal adhesion;ko05205//Proteoglycans in cancer;ko05203//Viral carcinogenesis;ko04530//Tight junction;ko04921//Oxytocin signaling pathway;ko04360//Axon guidance;ko04919//Thyroid hormone signaling pathwa…	K05704;K05704;K05704;K05704;K05704;K05704;K05704;K05704;K05704;K05704;K05704;K05704;K05704;K05704;K05704;K05704;K05704;K05704;K05704;K05704;K05704;K05704;K05704;K05704;K05704;K05704;K05704;K05704;K05704;K05704;K05704;K05704;K05704;K05704;K05704;K05704;K05704;K05704	GO:0005829//cytosol;GO:0005886//plasma membrane;GO:0031234//extrinsic component of cytoplasmic side of plasma membrane;GO:0045172//germline ring canal	GO:0004715//non-membrane spanning protein tyrosine kinase activity;GO:0005102//receptor binding;GO:0005524//ATP binding	GO:0000185//activation of MAPKKK activity;GO:0007169//transmembrane receptor protein tyrosine kinase signaling pathway;GO:0007293//germarium-derived egg chamber formation;GO:0007300//ovarian nurse cell to oocyte transport;GO:0007301//female germline ring canal formation;GO:0007349//cellularization;GO:0007411//axon guidance;GO:0007424//open tracheal system development;GO:0007435//salivary gland mo…
Sfur002827	17.477	8.73	7.367	ubxn-1	UBX domain-containing protein 1	-	-	-	-	GO:0048471//perinuclear region of cytoplasm	GO:0036435//K48-linked polyubiquitin binding	GO:0007283//spermatogenesis;GO:0030154//cell differentiation;GO:0042006//masculinization of hermaphroditic germ-line;GO:1903364//positive regulation of cellular protein catabolic process
Sfur002833	2.8	1.233	1.31	eg	Protein embryonic gonad	-	-	-	-	GO:0000790//nuclear chromatin	GO:0000978//RNA polymerase II core promoter proximal region sequence-specific DNA binding;GO:0004879//RNA polymerase II transcription factor activity, ligand-activated sequence-specific DNA binding;GO:0008270//zinc ion binding	GO:0006355//regulation of transcription, DNA-templated;GO:0006357//regulation of transcription from RNA polymerase II promoter;GO:0007417//central nervous system development;GO:0030154//cell differentiation
Sfur002834	7.773	3.45	2.72	PPIH	Peptidyl-prolyl cis-trans isomerase H	Genetic Information Processing	Transcription	ko03040//Spliceosome	K09567	GO:0005681//spliceosomal complex;GO:0005737//cytoplasm;GO:0016607//nuclear speck;GO:0043231//intracellular membrane-bounded organelle	GO:0003755//peptidyl-prolyl cis-trans isomerase activity;GO:0016018//cyclosporin A binding	GO:0000413//protein peptidyl-prolyl isomerization;GO:0006397//mRNA processing;GO:0006457//protein folding;GO:0008380//RNA splicing
Sfur002836	5.803	2.767	2.553	Sumf1	Formylglycine-generating enzyme	Cellular Processes	Transport and catabolism	ko04142//Lysosome	K13444	GO:0005783//endoplasmic reticulum;GO:0005788//endoplasmic reticulum lumen	GO:0042802//identical protein binding;GO:1903135//cupric ion binding	GO:0018158//protein oxidation;GO:0043687//post-translational protein modification
Sfur002847	1.853	0.867	0.893	--	Putative uncharacterized protein	-	-	-	-	-	-	-
Sfur002859	3.067	1.33	1.72	--	Putative uncharacterized protein	Metabolism	Metabolism of cofactors and vitamins	ko00830//Retinol metabolism	K15734	-	-	-
Sfur002862	27.323	7.153	5.747	Far1	Fatty acyl-CoA reductase 1	Cellular Processes;Organismal Systems	Transport and catabolism;Aging	ko04146//Peroxisome;ko04212//Longevity regulating pathway - worm	K13356;K13356	GO:0005777//peroxisome;GO:0005779//integral component of peroxisomal membrane;GO:0043231//intracellular membrane-bounded organelle	GO:0080019//fatty-acyl-CoA reductase (alcohol-forming) activity	GO:0008611//ether lipid biosynthetic process;GO:0010025//wax biosynthetic process;GO:0035336//long-chain fatty-acyl-CoA metabolic process;GO:0046474//glycerophospholipid biosynthetic process
Sfur002864	14.187	5.337	6.76	OGFOD3	2-oxoglutarate and iron-dependent oxygenase domain-containing protein 3	-	-	-	-	GO:0016020//membrane;GO:0016021//integral component of membrane	GO:0005506//iron ion binding;GO:0016705//oxidoreductase activity, acting on paired donors, with incorporation or reduction of molecular oxygen;GO:0031418//L-ascorbic acid binding;GO:0051213//dioxygenase activity	-
Sfur002876	13.77	7.723	6.49	DDX5	Probable ATP-dependent RNA helicase DDX17	-	-	-	-	GO:0005634//nucleus;GO:0005654//nucleoplasm;GO:0005730//nucleolus;GO:0005737//cytoplasm;GO:0005829//cytosol;GO:0016020//membrane;GO:0016607//nuclear speck;GO:0070062//extracellular exosome;GO:0071013//catalytic step 2 spliceosome;GO:1990904//ribonucleoprotein complex	GO:0003713//transcription coactivator activity;GO:0003723//RNA binding;GO:0003724//RNA helicase activity;GO:0003730//mRNA 3'-UTR binding;GO:0005516//calmodulin binding;GO:0005524//ATP binding;GO:0008186//RNA-dependent ATPase activity;GO:0019899//enzyme binding;GO:0035500//MH2 domain binding;GO:0036002//pre-mRNA binding;GO:0043021//ribonucleoprotein complex binding;GO:0046332//SMAD binding;GO:0048…	GO:0000122//negative regulation of transcription from RNA polymerase II promoter;GO:0000380//alternative mRNA splicing, via spliceosome;GO:0000381//regulation of alternative mRNA splicing, via spliceosome;GO:0000398//mRNA splicing, via spliceosome;GO:0000956//nuclear-transcribed mRNA catabolic process;GO:0001837//epithelial to mesenchymal transition;GO:0006357//regulation of transcription from RN…
Sfur002884	7.883	3.627	4.017	NINL	Ninein-like protein	-	-	-	-	GO:0005813//centrosome;GO:0005829//cytosol;GO:0005874//microtubule;GO:0045171//intercellular bridge	GO:0005509//calcium ion binding	GO:0000086//G2/M transition of mitotic cell cycle;GO:0010389//regulation of G2/M transition of mitotic cell cycle;GO:0034454//microtubule anchoring at centrosome
Sfur002886	27.953	15.86	13.907	DPAGT1	UDP-N-acetylglucosamine--dolichyl-phosphate N-acetylglucosaminephosphotransferase	Metabolism;Metabolism	Global and overview maps;Glycan biosynthesis and metabolism	ko01100//Metabolic pathways;ko00510//N-Glycan biosynthesis	K01001;K01001	GO:0005789//endoplasmic reticulum membrane;GO:0016020//membrane;GO:0016021//integral component of membrane	GO:0003975//UDP-N-acetylglucosamine-dolichyl-phosphate N-acetylglucosaminephosphotransferase activity;GO:0008963//phospho-N-acetylmuramoyl-pentapeptide-transferase activity;GO:0016757//transferase activity, transferring glycosyl groups;GO:0042802//identical protein binding;GO:0046872//metal ion binding	GO:0006487//protein N-linked glycosylation;GO:0006488//dolichol-linked oligosaccharide biosynthetic process;GO:0006489//dolichyl diphosphate biosynthetic process;GO:0019408//dolichol biosynthetic process
Sfur002888	7.403	3.15	3.107	Slc8a1	Sodium/calcium exchanger 1	Environmental Information Processing;Environmental Information Processing;Environmental Information Processing;Organismal Systems;Organismal Systems;Human Diseases;Human Diseases;Human Diseases;Organismal Systems;Organismal Systems;Organismal Systems;Organismal Systems	Signal transduction;Signal transduction;Signal transduction;Digestive system;Circulatory system;Cardiovascular diseases;Cardiovascular diseases;Cardiovascular diseases;Circulatory system;Excretory system;Sensory system;Digestive system	ko04020//Calcium signaling pathway;ko04022//cGMP - PKG signaling pathway;ko04371//Apelin signaling pathway;ko04974//Protein digestion and absorption;ko04261//Adrenergic signaling in cardiomyocytes;ko05414//Dilated cardiomyopathy (DCM);ko05410//Hypertrophic cardiomyopathy (HCM);ko05412//Arrhythmogenic right ventricular cardiomyopathy (ARVC);ko04260//Cardiac muscle contraction;ko04961//Endocrine an…	K05849;K05849;K05849;K05849;K05849;K05849;K05849;K05849;K05849;K05849;K05849;K05849	GO:0005654//nucleoplasm;GO:0005739//mitochondrion;GO:0005874//microtubule;GO:0005886//plasma membrane;GO:0005887//integral component of plasma membrane;GO:0014069//postsynaptic density;GO:0014704//intercalated disc;GO:0016020//membrane;GO:0016323//basolateral plasma membrane;GO:0030018//Z disc;GO:0030315//T-tubule;GO:0030424//axon;GO:0030425//dendrite;GO:0031226//intrinsic component of plasma mem…	GO:0005432//calcium:sodium antiporter activity;GO:0005509//calcium ion binding;GO:0005516//calmodulin binding;GO:0008092//cytoskeletal protein binding;GO:0015491//cation:cation antiporter activity;GO:0030506//ankyrin binding;GO:0044325//ion channel binding;GO:0099580//ion antiporter activity involved in regulation of postsynaptic membrane potential	GO:0001666//response to hypoxia;GO:0001892//embryonic placenta development;GO:0002026//regulation of the force of heart contraction;GO:0002027//regulation of heart rate;GO:0002028//regulation of sodium ion transport;GO:0003007//heart morphogenesis;GO:0006814//sodium ion transport;GO:0006816//calcium ion transport;GO:0006874//cellular calcium ion homeostasis;GO:0006883//cellular sodium ion homeost…
Sfur002894	109.797	49.03	43.723	BTBD19	BTB/POZ domain-containing protein 19	-	-	-	-	-	-	-
Sfur002897	15.573	7.56	6.907	Eci2	Enoyl-CoA delta isomerase 2	Cellular Processes;Metabolism	Transport and catabolism;Lipid metabolism	ko04146//Peroxisome;ko00071//Fatty acid degradation	K13239;K13239	GO:0005739//mitochondrion;GO:0005777//peroxisome;GO:0005782//peroxisomal matrix	GO:0000062//fatty-acyl-CoA binding;GO:0004165//dodecenoyl-CoA delta-isomerase activity;GO:0016863//intramolecular oxidoreductase activity, transposing C=C bonds	GO:0006635//fatty acid beta-oxidation;GO:0009062//fatty acid catabolic process
Sfur002901	11.283	3.76	4.617	ft	Cadherin-related tumor suppressor	Environmental Information Processing;Environmental Information Processing	Signal transduction;Signal transduction	ko04391//Hippo signaling pathway -fly;ko04392//Hippo signaling pathway - multiple species	K16669;K16669	GO:0005739//mitochondrion;GO:0005886//plasma membrane;GO:0005887//integral component of plasma membrane;GO:0016324//apical plasma membrane;GO:0016327//apicolateral plasma membrane	GO:0005509//calcium ion binding;GO:0045296//cadherin binding	GO:0001736//establishment of planar polarity;GO:0001737//establishment of imaginal disc-derived wing hair orientation;GO:0007156//homophilic cell adhesion via plasma membrane adhesion molecules;GO:0007157//heterophilic cell-cell adhesion via plasma membrane cell adhesion molecules;GO:0007164//establishment of tissue polarity;GO:0007446//imaginal disc growth;GO:0007447//imaginal disc pattern forma…
Sfur002907	3.037	1.487	1.983	--	Putative uncharacterized protein	-	-	-	-	-	-	-
Sfur002923	23.783	11.43	10.903	Pgant2	Polypeptide N-acetylgalactosaminyltransferase 2	Metabolism;Metabolism;Metabolism	Global and overview maps;Glycan biosynthesis and metabolism;Glycan biosynthesis and metabolism	ko01100//Metabolic pathways;ko00514//Other types of O-glycan biosynthesis;ko00512//Mucin type O-glycan biosynthesis	K00710;K00710;K00710	GO:0000139//Golgi membrane;GO:0005794//Golgi apparatus;GO:0005795//Golgi stack;GO:0016021//integral component of membrane	GO:0004653//polypeptide N-acetylgalactosaminyltransferase activity;GO:0030246//carbohydrate binding;GO:0046872//metal ion binding	GO:0006486//protein glycosylation;GO:0009312//oligosaccharide biosynthetic process
Sfur002925	6.597	3.303	3.09	PIGN	GPI ethanolamine phosphate transferase 1	Metabolism;Metabolism	Global and overview maps;Glycan biosynthesis and metabolism	ko01100//Metabolic pathways;ko00563//Glycosylphosphatidylinositol(GPI)-anchor biosynthesis	K05285;K05285	GO:0005789//endoplasmic reticulum membrane;GO:0005829//cytosol;GO:0005886//plasma membrane;GO:0016020//membrane;GO:0016021//integral component of membrane	GO:0051377//mannose-ethanolamine phosphotransferase activity	GO:0006506//GPI anchor biosynthetic process;GO:0016254//preassembly of GPI anchor in ER membrane
Sfur002933	14.157	7.27	6.947	Mtor	Nucleoprotein TPR	Human Diseases;Genetic Information Processing;Human Diseases	Cancers;Translation;Cancers	ko05200//Pathways in cancer;ko03013//RNA transport;ko05216//Thyroid cancer	K09291;K09291;K09291	GO:0000775//chromosome, centromeric region;GO:0005634//nucleus;GO:0005635//nuclear envelope;GO:0005643//nuclear pore;GO:0005652//nuclear lamina;GO:0005654//nucleoplasm;GO:0005719//nuclear euchromatin;GO:0005730//nucleolus;GO:0005737//cytoplasm;GO:0005819//spindle;GO:0016363//nuclear matrix;GO:0030496//midbody;GO:0031965//nuclear membrane;GO:0034399//nuclear periphery;GO:0042405//nuclear inclusion…	GO:0017056//structural constituent of nuclear pore;GO:0031490//chromatin DNA binding;GO:0043021//ribonucleoprotein complex binding	GO:0000022//mitotic spindle elongation;GO:0006325//chromatin organization;GO:0006338//chromatin remodeling;GO:0006355//regulation of transcription, DNA-templated;GO:0006406//mRNA export from nucleus;GO:0006606//protein import into nucleus;GO:0007094//mitotic spindle assembly checkpoint;GO:0007346//regulation of mitotic cell cycle;GO:0007549//dosage compensation;GO:0009408//response to heat;GO:001…
Sfur002946	3.793	1.633	2.037	ATF7IP	Activating transcription factor 7-interacting protein 1	-	-	-	-	GO:0005634//nucleus;GO:0005654//nucleoplasm;GO:0005667//transcription factor complex;GO:0005829//cytosol;GO:0016604//nuclear body	GO:0003714//transcription corepressor activity;GO:0016887//ATPase activity	GO:0000122//negative regulation of transcription from RNA polymerase II promoter;GO:0006306//DNA methylation;GO:0016032//viral process;GO:0031647//regulation of protein stability;GO:0045892//negative regulation of transcription, DNA-templated;GO:0045893//positive regulation of transcription, DNA-templated;GO:0045898//regulation of RNA polymerase II transcriptional preinitiation complex assembly;G…
Sfur002960	3.07	1.207	1.06	--	Noggin	Environmental Information Processing	Signal transduction	ko04350//TGF-beta signaling pathway	K04658	GO:0005576//extracellular region	-	GO:0030154//cell differentiation;GO:0030514//negative regulation of BMP signaling pathway;GO:0045596//negative regulation of cell differentiation;GO:0051216//cartilage development
Sfur002974	3.68	0.083	0.06	PNLIP	Pancreatic triacylglycerol lipase (Fragment)	Metabolism;Organismal Systems;Metabolism;Organismal Systems;Organismal Systems	Global and overview maps;Digestive system;Lipid metabolism;Digestive system;Digestive system	ko01100//Metabolic pathways;ko04972//Pancreatic secretion;ko00561//Glycerolipid metabolism;ko04977//Vitamin digestion and absorption;ko04975//Fat digestion and absorption	K14073;K14073;K14073;K14073;K14073	GO:0005615//extracellular space	GO:0004806//triglyceride lipase activity;GO:0016298//lipase activity;GO:0046872//metal ion binding	GO:0016042//lipid catabolic process
Sfur003002	14.093	5.847	5.583	mle	ATP-dependent RNA helicase A	-	-	-	-	GO:0005634//nucleus;GO:0005654//nucleoplasm;GO:0005726//perichromatin fibrils;GO:0005730//nucleolus;GO:0005737//cytoplasm;GO:0005813//centrosome;GO:0005844//polysome;GO:0015629//actin cytoskeleton;GO:0016442//RISC complex;GO:0016604//nuclear body;GO:0032991//macromolecular complex;GO:0036464//cytoplasmic ribonucleoprotein granule;GO:0042788//polysomal ribosome;GO:0070578//RISC-loading complex;GO:…	GO:0000978//RNA polymerase II core promoter proximal region sequence-specific DNA binding;GO:0000993//RNA polymerase II core binding;GO:0001069//regulatory region RNA binding;GO:0001085//RNA polymerase II transcription factor binding;GO:0003677//DNA binding;GO:0003678//DNA helicase activity;GO:0003688//DNA replication origin binding;GO:0003690//double-stranded DNA binding;GO:0003697//single-stran…	GO:0000380//alternative mRNA splicing, via spliceosome;GO:0006353//DNA-templated transcription, termination;GO:0006357//regulation of transcription from RNA polymerase II promoter;GO:0006954//inflammatory response;GO:0007623//circadian rhythm;GO:0010501//RNA secondary structure unwinding;GO:0030423//targeting of mRNA for destruction involved in RNA interference;GO:0032508//DNA duplex unwinding;GO…
Sfur003019	30.99	2.183	1.847	--	Lipase member H-B	Metabolism;Organismal Systems;Metabolism;Organismal Systems	Global and overview maps;Digestive system;Lipid metabolism;Digestive system	ko01100//Metabolic pathways;ko04972//Pancreatic secretion;ko00561//Glycerolipid metabolism;ko04975//Fat digestion and absorption	K14075;K14075;K14075;K14075	GO:0005576//extracellular region;GO:0005886//plasma membrane	GO:0004806//triglyceride lipase activity	GO:0016042//lipid catabolic process
Sfur003025	18.983	9.207	8.23	ACTL6B	Actin-like protein 6B	Organismal Systems;Human Diseases	Environmental adaptation;Cancers	ko04714//Thermogenesis;ko05225//Hepatocellular carcinoma	K11652;K11652	GO:0005634//nucleus;GO:0016514//SWI/SNF complex;GO:0035267//NuA4 histone acetyltransferase complex;GO:0071565//nBAF complex	GO:0003682//chromatin binding;GO:0003713//transcription coactivator activity;GO:0005200//structural constituent of cytoskeleton	GO:0006325//chromatin organization;GO:0006338//chromatin remodeling;GO:0006357//regulation of transcription from RNA polymerase II promoter;GO:0007399//nervous system development;GO:0016358//dendrite development;GO:0021510//spinal cord development;GO:0042551//neuron maturation;GO:0043044//ATP-dependent chromatin remodeling;GO:0043967//histone H4 acetylation
Sfur003040	4.763	2.287	2.34	Kif23	Kinesin-like protein KIF23	Human Diseases	Cancers	ko05206//MicroRNAs in cancer	K17387	GO:0005634//nucleus;GO:0005654//nucleoplasm;GO:0005737//cytoplasm;GO:0005813//centrosome;GO:0005819//spindle;GO:0005871//kinesin complex;GO:0005874//microtubule;GO:0030496//midbody;GO:0045171//intercellular bridge;GO:0072686//mitotic spindle;GO:0090543//Flemming body;GO:0097149//centralspindlin complex	GO:0003777//microtubule motor activity;GO:0005524//ATP binding;GO:0008017//microtubule binding;GO:0016887//ATPase activity	GO:0000281//mitotic cytokinesis;GO:0000915//actomyosin contractile ring assembly;GO:0007018//microtubule-based movement;GO:0032467//positive regulation of cytokinesis;GO:0051256//mitotic spindle midzone assembly;GO:0072383//plus-end-directed vesicle transport along microtubule
Sfur003068	4.863	0.807	1.037	CG4666	Protein THEM6	-	-	-	-	GO:0005576//extracellular region	-	-
Sfur003077	5.66	1.807	2.373	DCLRE1A	DNA cross-link repair 1A protein	-	-	-	-	GO:0000784//nuclear chromosome, telomeric region;GO:0005654//nucleoplasm	GO:0003684//damaged DNA binding;GO:0035312//5'-3' exodeoxyribonuclease activity;GO:0046872//metal ion binding	GO:0000715//nucleotide-excision repair, DNA damage recognition;GO:0006281//DNA repair;GO:0006303//double-strand break repair via nonhomologous end joining;GO:0031848//protection from non-homologous end joining at telomere;GO:0036297//interstrand cross-link repair
Sfur003085	6.31	2.873	3.61	--	Putative uncharacterized protein	-	-	-	-	-	-	-
Sfur003094	10.027	4.003	4.693	ft	Cadherin-related tumor suppressor	Environmental Information Processing;Environmental Information Processing	Signal transduction;Signal transduction	ko04391//Hippo signaling pathway -fly;ko04392//Hippo signaling pathway - multiple species	K16669;K16669	GO:0005739//mitochondrion;GO:0005886//plasma membrane;GO:0005887//integral component of plasma membrane;GO:0016324//apical plasma membrane;GO:0016327//apicolateral plasma membrane	GO:0005509//calcium ion binding;GO:0045296//cadherin binding	GO:0001736//establishment of planar polarity;GO:0001737//establishment of imaginal disc-derived wing hair orientation;GO:0007156//homophilic cell adhesion via plasma membrane adhesion molecules;GO:0007157//heterophilic cell-cell adhesion via plasma membrane cell adhesion molecules;GO:0007164//establishment of tissue polarity;GO:0007446//imaginal disc growth;GO:0007447//imaginal disc pattern forma…
Sfur003099	10.023	4.12	3.107	grin2b	Glutamate receptor ionotropic, NMDA 2B	Human Diseases;Human Diseases;Environmental Information Processing;Environmental Information Processing;Environmental Information Processing;Environmental Information Processing;Human Diseases;Organismal Systems;Human Diseases;Organismal Systems;Organismal Systems;Human Diseases;Organismal Systems;Human Diseases;Human Diseases;Human Diseases;Human Diseases	Neurodegenerative diseases;Neurodegenerative diseases;Signal transduction;Signaling molecules and interaction;Signal transduction;Signal transduction;Neurodegenerative disease;Nervous system;Substance dependence;Environmental adaptation;Nervous system;Substance dependence;Nervous system;Substance dependence;Neurodegenerative diseases;Substance dependence;Immune diseases	ko05010//Alzheimer disease;ko05016//Huntington disease;ko04024//cAMP signaling pathway;ko04080//Neuroactive ligand-receptor interaction;ko04015//Rap1 signaling pathway;ko04014//Ras signaling pathway;ko05017//Spinocerebellar ataxia;ko04728//Dopaminergic synapse;ko05034//Alcoholism;ko04713//Circadian entrainment;ko04724//Glutamatergic synapse;ko05031//Amphetamine addiction;ko04720//Long-term potent…	K05210;K05210;K05210;K05210;K05210;K05210;K05210;K05210;K05210;K05210;K05210;K05210;K05210;K05210;K05210;K05210;K05210	GO:0005764//lysosome;GO:0005770//late endosome;GO:0005887//integral component of plasma membrane;GO:0017146//NMDA selective glutamate receptor complex;GO:0045211//postsynaptic membrane	GO:0004972//NMDA glutamate receptor activity;GO:0046872//metal ion binding	GO:0010043//response to zinc ion;GO:0032026//response to magnesium ion
Sfur003111	2.277	1.277	1.077	HPF1	Histone PARylation factor 1	-	-	-	-	GO:0005634//nucleus	GO:0008270//zinc ion binding;GO:0042393//histone binding;GO:0072572//poly-ADP-D-ribose binding	GO:0006974//cellular response to DNA damage stimulus;GO:0010835//regulation of protein ADP-ribosylation;GO:0018312//peptidyl-serine ADP-ribosylation
Sfur003112	12.677	5.227	5.12	brun	Protein brunelleschi	-	-	-	-	GO:0005737//cytoplasm;GO:0005794//Golgi apparatus;GO:0005802//trans-Golgi network;GO:0030008//TRAPP complex;GO:0036063//acroblast;GO:1990071//TRAPPII protein complex	-	GO:0000212//meiotic spindle organization;GO:0000916//actomyosin contractile ring contraction;GO:0006891//intra-Golgi vesicle-mediated transport;GO:0007110//meiosis I cytokinesis;GO:0007111//meiosis II cytokinesis;GO:0007112//male meiosis cytokinesis;GO:0043087//regulation of GTPase activity;GO:0048137//spermatocyte division;GO:0048193//Golgi vesicle transport
Sfur003132	8.893	2.91	2.87	DAT	Sodium-dependent dopamine transporter	Human Diseases;Organismal Systems;Human Diseases;Organismal Systems;Human Diseases;Human Diseases	Neurodegenerative diseases;Nervous system;Substance dependence;Nervous system;Substance dependence;Substance dependence	ko05012//Parkinson disease;ko04728//Dopaminergic synapse;ko05034//Alcoholism;ko04721//Synaptic vesicle cycle;ko05031//Amphetamine addiction;ko05030//Cocaine addiction	K05036;K05036;K05036;K05036;K05036;K05036	GO:0005886//plasma membrane;GO:0005887//integral component of plasma membrane;GO:0032809//neuronal cell body membrane;GO:0042734//presynaptic membrane;GO:0043005//neuron projection	GO:0005330//dopamine:sodium symporter activity;GO:0019811//cocaine binding;GO:0046872//metal ion binding	GO:0008344//adult locomotory behavior;GO:0015872//dopamine transport;GO:0015874//norepinephrine transport;GO:0030431//sleep;GO:0035725//sodium ion transmembrane transport;GO:0042745//circadian sleep/wake cycle;GO:0051583//dopamine uptake involved in synaptic transmission;GO:0099509//regulation of presynaptic cytosolic calcium ion concentration;GO:1990834//response to odorant
Sfur003138	11.557	5.69	5.873	mthl1	Probable G-protein coupled receptor Mth-like 1	-	-	-	-	GO:0005886//plasma membrane;GO:0016021//integral component of membrane	GO:0004930//G-protein coupled receptor activity	GO:0007166//cell surface receptor signaling pathway;GO:0007186//G-protein coupled receptor signaling pathway;GO:0007369//gastrulation;GO:0007472//wing disc morphogenesis;GO:0007476//imaginal disc-derived wing morphogenesis;GO:0007509//mesoderm migration involved in gastrulation;GO:0008340//determination of adult lifespan;GO:0042594//response to starvation;GO:0043519//regulation of myosin II filam…
Sfur003142	4.903	2.607	2.22	MVK	Mevalonate kinase	Metabolism;Cellular Processes;Metabolism	Global and overview maps;Transport and catabolism;Metabolism of terpenoids and polyketides	ko01100//Metabolic pathways;ko04146//Peroxisome;ko00900//Terpenoid backbone biosynthesis	K00869;K00869;K00869	GO:0005777//peroxisome;GO:0005829//cytosol;GO:0043231//intracellular membrane-bounded organelle	GO:0000287//magnesium ion binding;GO:0004496//mevalonate kinase activity;GO:0005524//ATP binding;GO:0042802//identical protein binding	GO:0006695//cholesterol biosynthetic process;GO:0008299//isoprenoid biosynthetic process;GO:0019287//isopentenyl diphosphate biosynthetic process, mevalonate pathway;GO:0045540//regulation of cholesterol biosynthetic process;GO:0050728//negative regulation of inflammatory response
Sfur003158	59.867	2.1	2.69	SULT1C4	Luciferin sulfotransferase	-	-	-	-	-	GO:0008146//sulfotransferase activity	-
Sfur003161	11.993	5.613	5.46	PBK	Lymphokine-activated killer T-cell-originated protein kinase	-	-	-	-	GO:0005634//nucleus	GO:0004674//protein serine/threonine kinase activity;GO:0004708//MAP kinase kinase activity;GO:0005524//ATP binding	GO:0000278//mitotic cell cycle;GO:0032435//negative regulation of proteasomal ubiquitin-dependent protein catabolic process;GO:0032873//negative regulation of stress-activated MAPK cascade;GO:0034644//cellular response to UV;GO:0050728//negative regulation of inflammatory response
Sfur003162	20.907	10.947	9.233	prpf31	U4/U6 small nuclear ribonucleoprotein Prp31	Genetic Information Processing	Transcription	ko03040//Spliceosome	K12844	GO:0005634//nucleus;GO:0005687//U4 snRNP;GO:0005690//U4atac snRNP;GO:0015030//Cajal body;GO:0016607//nuclear speck;GO:0046540//U4/U6 x U5 tri-snRNP complex;GO:0071005//U2-type precatalytic spliceosome;GO:0071011//precatalytic spliceosome;GO:0071339//MLL1 complex;GO:0097526//spliceosomal tri-snRNP complex	GO:0030622//U4atac snRNA binding	GO:0000244//spliceosomal tri-snRNP complex assembly;GO:0000398//mRNA splicing, via spliceosome;GO:0060041//retina development in camera-type eye
Sfur003164	10.987	4.003	3.957	nas-7	Zinc metalloproteinase nas-14	-	-	-	-	GO:0005576//extracellular region	GO:0004222//metalloendopeptidase activity;GO:0008270//zinc ion binding	-
Sfur003165	198.653	19.513	21.613	--	Putative uncharacterized protein	-	-	-	-	-	-	-
Sfur003180	14.833	7.357	6.48	--	Putative uncharacterized protein	-	-	-	-	-	-	-
Sfur003200	18.737	7.977	7.863	GCN1	eIF-2-alpha kinase activator GCN1	-	-	-	-	GO:0005737//cytoplasm;GO:0005829//cytosol;GO:0005840//ribosome;GO:0005844//polysome;GO:0016020//membrane	GO:0003723//RNA binding;GO:0008135//translation factor activity, RNA binding;GO:0019887//protein kinase regulator activity;GO:0019901//protein kinase binding;GO:0043022//ribosome binding;GO:0045296//cadherin binding	GO:0033674//positive regulation of kinase activity;GO:0034198//cellular response to amino acid starvation;GO:0036003//positive regulation of transcription from RNA polymerase II promoter in response to stress;GO:1990253//cellular response to leucine starvation
Sfur003211	2.243	0.42	0.52	Trmt61a	tRNA (adenine(58)-N(1))-methyltransferase catalytic subunit TRMT61A	-	-	-	-	GO:0005634//nucleus;GO:0031515//tRNA (m1A) methyltransferase complex	GO:0016429//tRNA (adenine-N1-)-methyltransferase activity	GO:0030488//tRNA methylation;GO:0080009//mRNA methylation
Sfur003212	21.757	10.087	10.057	ine	Sodium- and chloride-dependent GABA transporter ine	-	-	-	-	GO:0005886//plasma membrane;GO:0016021//integral component of membrane;GO:0016323//basolateral plasma membrane	GO:0005034//osmosensor activity;GO:0005328//neurotransmitter:sodium symporter activity	GO:0006836//neurotransmitter transport;GO:0009414//response to water deprivation;GO:0019226//transmission of nerve impulse;GO:0035725//sodium ion transmembrane transport;GO:0042065//glial cell growth;GO:0042066//perineurial glial growth;GO:0047484//regulation of response to osmotic stress;GO:0050891//multicellular organismal water homeostasis
Sfur003232	7.66	3.717	4.183	CaMKMT	Protein-lysine N-methyltransferase EEF2KMT	-	-	-	-	GO:0005737//cytoplasm	GO:0016279//protein-lysine N-methyltransferase activity	GO:0018023//peptidyl-lysine trimethylation
Sfur003254	8.21	0.07	0.02	--	Putative uncharacterized protein	-	-	-	-	-	-	-
Sfur003256	4.963	2.39	1.83	Rfc5	Replication factor C subunit 5	Genetic Information Processing;Genetic Information Processing;Genetic Information Processing	Replication and repair;Replication and repair;Replication and repair	ko03420//Nucleotide excision repair;ko03030//DNA replication;ko03430//Mismatch repair	K10756;K10756;K10756	GO:0005634//nucleus;GO:0005663//DNA replication factor C complex;GO:0031390//Ctf18 RFC-like complex	GO:0003689//DNA clamp loader activity;GO:0005524//ATP binding;GO:0017116//single-stranded DNA-dependent ATP-dependent DNA helicase activity;GO:0019899//enzyme binding	GO:0006261//DNA-dependent DNA replication;GO:0006281//DNA repair;GO:1900264//positive regulation of DNA-directed DNA polymerase activity
Sfur003263	11.937	5.63	5.213	Erp44	Endoplasmic reticulum resident protein 44	-	-	-	-	GO:0005788//endoplasmic reticulum lumen;GO:0005789//endoplasmic reticulum membrane;GO:0005793//endoplasmic reticulum-Golgi intermediate compartment;GO:0009986//cell surface	GO:0003756//protein disulfide isomerase activity	GO:0006457//protein folding;GO:0006986//response to unfolded protein;GO:0009100//glycoprotein metabolic process;GO:0034976//response to endoplasmic reticulum stress
Sfur003266	91.783	40	41.687	Akap1	A-kinase anchor protein 1, mitochondrial	-	-	-	-	GO:0005739//mitochondrion;GO:0005741//mitochondrial outer membrane;GO:0005783//endoplasmic reticulum;GO:0005811//lipid particle;GO:0016021//integral component of membrane;GO:0030061//mitochondrial crista;GO:0031594//neuromuscular junction;GO:0045211//postsynaptic membrane	GO:0003723//RNA binding;GO:0008017//microtubule binding;GO:0019901//protein kinase binding;GO:0019903//protein phosphatase binding;GO:0030346//protein phosphatase 2B binding;GO:0034237//protein kinase A regulatory subunit binding;GO:0048487//beta-tubulin binding;GO:0060090//binding, bridging	GO:0010614//negative regulation of cardiac muscle hypertrophy;GO:0010738//regulation of protein kinase A signaling;GO:0035308//negative regulation of protein dephosphorylation;GO:0042308//negative regulation of protein import into nucleus
Sfur003278	32.167	17.26	15.867	Rpb11	DNA-directed RNA polymerase II subunit RPB11	Human Diseases;Genetic Information Processing	Neurodegenerative diseases;Transcription	ko05016//Huntington disease;ko03020//RNA polymerase	K03008;K03008	GO:0005665//DNA-directed RNA polymerase II, core complex	GO:0001055//RNA polymerase II activity;GO:0003677//DNA binding;GO:0046983//protein dimerization activity	-
Sfur003283	29.457	4.07	4.817	--	Putative uncharacterized protein	-	-	-	-	-	-	-
Sfur003300	11.163	0.08	0.167	Eip75B	Ecdysone-induced protein 75B, isoform B	-	-	-	-	GO:0005634//nucleus	GO:0000978//RNA polymerase II core promoter proximal region sequence-specific DNA binding;GO:0003677//DNA binding;GO:0004879//RNA polymerase II transcription factor activity, ligand-activated sequence-specific DNA binding;GO:0008270//zinc ion binding;GO:0020037//heme binding	GO:0000122//negative regulation of transcription from RNA polymerase II promoter;GO:0007275//multicellular organism development;GO:0007553//regulation of ecdysteroid metabolic process;GO:0007591//molting cycle, chitin-based cuticle;GO:0009755//hormone-mediated signaling pathway;GO:0010468//regulation of gene expression;GO:0018990//ecdysis, chitin-based cuticle;GO:0030154//cell differentiation;GO:…
Sfur003311	0.737	0.127	0.147	--	Putative uncharacterized protein	-	-	-	-	-	-	-
Sfur003318	193.237	34.227	39.123	--	Putative uncharacterized protein	-	-	-	-	-	-	-
Sfur003362	65.35	13.58	10.983	--	Phospholipase A2 isozymes PA3A/PA3B/PA5	Metabolism;Environmental Information Processing;Organismal Systems;Organismal Systems;Metabolism;Organismal Systems;Metabolism;Metabolism;Metabolism;Metabolism	Global and overview maps;Signal transduction;Digestive system;Circulatory system;Lipid metabolism;Digestive system;Lipid metabolism;Lipid metabolism;Lipid metabolism;Lipid metabolism	ko01100//Metabolic pathways;ko04014//Ras signaling pathway;ko04972//Pancreatic secretion;ko04270//Vascular smooth muscle contraction;ko00564//Glycerophospholipid metabolism;ko04975//Fat digestion and absorption;ko00590//Arachidonic acid metabolism;ko00565//Ether lipid metabolism;ko00592//alpha-Linolenic acid metabolism;ko00591//Linoleic acid metabolism	K01047;K01047;K01047;K01047;K01047;K01047;K01047;K01047;K01047;K01047	GO:0005576//extracellular region	GO:0004623//phospholipase A2 activity;GO:0046872//metal ion binding	GO:0006644//phospholipid metabolic process;GO:0016042//lipid catabolic process;GO:0050482//arachidonic acid secretion
Sfur003369	68.877	28.363	30.417	Ugt2b1	UDP-glycosyltransferase UGT5	Metabolism;Metabolism;Metabolism;Metabolism;Metabolism;Metabolism;Human Diseases;Metabolism;Metabolism;Metabolism	Global and overview maps;Xenobiotics biodegradation and metabolism;Metabolism of cofactors and vitamins;Carbohydrate metabolism;Carbohydrate metabolism;Metabolism of cofactors and vitamins;Cancers;Xenobiotics biodegradation and metabolism;Xenobiotics biodegradation and metabolism;Lipid metabolism	ko01100//Metabolic pathways;ko00983//Drug metabolism - other enzymes;ko00830//Retinol metabolism;ko00053//Ascorbate and aldarate metabolism;ko00040//Pentose and glucuronate interconversions;ko00860//Porphyrin and chlorophyll metabolism;ko05204//Chemical carcinogenesis;ko00980//Metabolism of xenobiotics by cytochrome P450;ko00982//Drug metabolism - cytochrome P450;ko00140//Steroid hormone biosynth…	K00699;K00699;K00699;K00699;K00699;K00699;K00699;K00699;K00699;K00699	GO:0005783//endoplasmic reticulum;GO:0016021//integral component of membrane;GO:0031090//organelle membrane	GO:0008194//UDP-glycosyltransferase activity	-
Sfur003370	5.253	1.95	1.803	lig1	DNA ligase 1	Genetic Information Processing;Genetic Information Processing;Genetic Information Processing;Genetic Information Processing	Replication and repair;Replication and repair;Replication and repair;Replication and repair	ko03420//Nucleotide excision repair;ko03030//DNA replication;ko03410//Base excision repair;ko03430//Mismatch repair	K10747;K10747;K10747;K10747	GO:0005634//nucleus	GO:0003677//DNA binding;GO:0003910//DNA ligase (ATP) activity;GO:0005524//ATP binding;GO:0046872//metal ion binding	GO:0006260//DNA replication;GO:0006310//DNA recombination;GO:0007049//cell cycle;GO:0051103//DNA ligation involved in DNA repair;GO:0051301//cell division;GO:0071897//DNA biosynthetic process
Sfur003374	3.463	1.057	0.783	--	Separin	Human Diseases;Cellular Processes;Cellular Processes	Infectious diseases;Cell growth and death;Cell growth and death	ko05166//HTLV-I infection;ko04110//Cell cycle;ko04114//Oocyte meiosis	K02365;K02365;K02365	GO:0005634//nucleus;GO:0005737//cytoplasm;GO:0005813//centrosome;GO:0072686//mitotic spindle	GO:0004197//cysteine-type endopeptidase activity;GO:0008233//peptidase activity;GO:0008234//cysteine-type peptidase activity	GO:0000070//mitotic sister chromatid segregation;GO:0000212//meiotic spindle organization;GO:0000278//mitotic cell cycle;GO:0007059//chromosome segregation;GO:0007127//meiosis I;GO:0045143//homologous chromosome segregation;GO:0051307//meiotic chromosome separation
Sfur003400	3.023	1.403	1.197	--	Putative uncharacterized protein	-	-	-	-	-	-	-
Sfur003408	4.433	1.667	2.55	Mad2l1	Mitotic spindle assembly checkpoint protein MAD2A	Human Diseases;Cellular Processes;Cellular Processes;Organismal Systems	Infectious diseases;Cell growth and death;Cell growth and death;Endocrine system	ko05166//HTLV-I infection;ko04110//Cell cycle;ko04114//Oocyte meiosis;ko04914//Progesterone-mediated oocyte maturation	K02537;K02537;K02537;K02537	GO:0000775//chromosome, centromeric region;GO:0000776//kinetochore;GO:0000777//condensed chromosome kinetochore;GO:0000922//spindle pole;GO:0005634//nucleus;GO:0005654//nucleoplasm;GO:0005694//chromosome;GO:0005737//cytoplasm;GO:0005829//cytosol;GO:0044615//nuclear pore nuclear basket;GO:0048471//perinuclear region of cytoplasm;GO:0072686//mitotic spindle	GO:0008022//protein C-terminus binding;GO:0042802//identical protein binding;GO:0042803//protein homodimerization activity	GO:0000070//mitotic sister chromatid segregation;GO:0000132//establishment of mitotic spindle orientation;GO:0007093//mitotic cell cycle checkpoint;GO:0007094//mitotic spindle assembly checkpoint;GO:0042177//negative regulation of protein catabolic process;GO:0043066//negative regulation of apoptotic process;GO:0045841//negative regulation of mitotic metaphase/anaphase transition;GO:0045930//nega…
Sfur003410	7.59	3.603	3.527	RALGAPB	Ral GTPase-activating protein subunit beta	-	-	-	-	-	GO:0005096//GTPase activator activity;GO:0046982//protein heterodimerization activity	GO:0051056//regulation of small GTPase mediated signal transduction;GO:0090630//activation of GTPase activity
Sfur003437	2.007	0.053	0.083	--	Putative uncharacterized protein	-	-	-	-	-	-	-
Sfur003438	6.4	3.247	2.597	r	CAD protein	Metabolism;Metabolism;Metabolism	Global and overview maps;Nucleotide metabolism;Amino acid metabolism	ko01100//Metabolic pathways;ko00240//Pyrimidine metabolism;ko00250//Alanine, aspartate and glutamate metabolism	K11540;K11540;K11540	GO:0005737//cytoplasm;GO:0005829//cytosol	GO:0004070//aspartate carbamoyltransferase activity;GO:0004088//carbamoyl-phosphate synthase (glutamine-hydrolyzing) activity;GO:0004151//dihydroorotase activity;GO:0005524//ATP binding;GO:0046872//metal ion binding;GO:0070406//glutamine binding	GO:0006207//'de novo' pyrimidine nucleobase biosynthetic process;GO:0006228//UTP biosynthetic process;GO:0006541//glutamine metabolic process;GO:0006807//nitrogen compound metabolic process;GO:0019240//citrulline biosynthetic process;GO:0044205//'de novo' UMP biosynthetic process
Sfur003462	27.297	8.347	10.273	CPM	Carboxypeptidase M	-	-	-	-	GO:0005886//plasma membrane;GO:0031225//anchored component of membrane	GO:0004181//metallocarboxypeptidase activity;GO:0008270//zinc ion binding	-
Sfur003468	57.587	24.01	30.47	E75	Ecdysone-induced protein 75B, isoform A	-	-	-	-	GO:0005634//nucleus	GO:0000978//RNA polymerase II core promoter proximal region sequence-specific DNA binding;GO:0003677//DNA binding;GO:0004879//RNA polymerase II transcription factor activity, ligand-activated sequence-specific DNA binding;GO:0008270//zinc ion binding;GO:0020037//heme binding	GO:0000122//negative regulation of transcription from RNA polymerase II promoter;GO:0007275//multicellular organism development;GO:0007553//regulation of ecdysteroid metabolic process;GO:0007591//molting cycle, chitin-based cuticle;GO:0009755//hormone-mediated signaling pathway;GO:0010468//regulation of gene expression;GO:0018990//ecdysis, chitin-based cuticle;GO:0030154//cell differentiation;GO:…
Sfur003469	9.67	3.26	2.553	--	SH3 domain-containing protein Dlish	-	-	-	-	GO:0005737//cytoplasm;GO:0016327//apicolateral plasma membrane;GO:0045179//apical cortex	GO:0045296//cadherin binding	GO:0001736//establishment of planar polarity;GO:0032436//positive regulation of proteasomal ubiquitin-dependent protein catabolic process;GO:0035331//negative regulation of hippo signaling;GO:0090163//establishment of epithelial cell planar polarity;GO:0090251//protein localization involved in establishment of planar polarity
Sfur003484	1.763	0.867	0.79	ttc21b	Tetratricopeptide repeat protein 21B	-	-	-	-	GO:0030991//intraciliary transport particle A	-	-
Sfur003489	17.73	0.873	0.76	--	Putative uncharacterized protein	-	-	-	-	-	-	-
Sfur003519	14.7	7.13	6.31	TRMT2A	tRNA (uracil-5-)-methyltransferase homolog A	-	-	-	-	-	GO:0003723//RNA binding;GO:0008173//RNA methyltransferase activity	GO:0006396//RNA processing
Sfur003520	15.347	0.48	0.437	--	Putative uncharacterized protein	-	-	-	-	-	-	-
Sfur003528	6.687	3.173	3.16	Taf2	Transcription initiation factor TFIID subunit 2	Genetic Information Processing	Transcription	ko03022//Basal transcription factors	K03128	GO:0005634//nucleus;GO:0005669//transcription factor TFIID complex	GO:0000976//transcription regulatory region sequence-specific DNA binding;GO:0000979//RNA polymerase II core promoter sequence-specific DNA binding;GO:0003682//chromatin binding;GO:0008134//transcription factor binding;GO:0008237//metallopeptidase activity;GO:0008270//zinc ion binding;GO:0017025//TBP-class protein binding	GO:0006352//DNA-templated transcription, initiation;GO:0006366//transcription from RNA polymerase II promoter;GO:0006367//transcription initiation from RNA polymerase II promoter;GO:0051123//RNA polymerase II transcriptional preinitiation complex assembly
Sfur003542	1.6	0.463	0.583	prkrip1	PRKR-interacting protein 1 homolog	-	-	-	-	GO:0005681//spliceosomal complex;GO:0005730//nucleolus	GO:0003725//double-stranded RNA binding	GO:0006397//mRNA processing;GO:0008380//RNA splicing
Sfur003547	7.157	1.413	1.43	nas-13	Zinc metalloproteinase nas-13	Organismal Systems	Digestive system	ko04974//Protein digestion and absorption	K08606	GO:0005576//extracellular region	GO:0004222//metalloendopeptidase activity;GO:0008270//zinc ion binding	-
Sfur003548	15.937	7.553	8.02	SEPTIN4	Septin-4	Cellular Processes;Cellular Processes	Cell growth and death;Cell growth and death	ko04210//Apoptosis;ko04215//Apoptosis - multiple species	K16943;K16943	GO:0031105//septin complex;GO:0031514//motile cilium	GO:0005525//GTP binding	GO:0007049//cell cycle;GO:0007283//spermatogenesis;GO:0030154//cell differentiation;GO:0051301//cell division
Sfur003563	2.61	1.273	1.157	Cabin1	Calcineurin-binding protein cabin-1	-	-	-	-	GO:0005634//nucleus;GO:0005737//cytoplasm	GO:0004864//protein phosphatase inhibitor activity;GO:0019904//protein domain specific binding;GO:0030346//protein phosphatase 2B binding	GO:0006336//DNA replication-independent nucleosome assembly;GO:0014823//response to activity;GO:0060548//negative regulation of cell death
Sfur003569	5.897	2.993	2.913	Adat1	tRNA-specific adenosine deaminase 1	-	-	-	-	-	GO:0003723//RNA binding;GO:0008251//tRNA-specific adenosine deaminase activity;GO:0046872//metal ion binding	GO:0008033//tRNA processing
Sfur003581	2.36	0.583	0.57	--	Putative uncharacterized protein	-	-	-	-	-	-	-
Sfur003598	8.767	3.84	4.073	dx	Protein deltex	Environmental Information Processing	Signal transduction	ko04330//Notch signaling pathway	K06058	GO:0005654//nucleoplasm;GO:0005737//cytoplasm;GO:0005829//cytosol	GO:0005112//Notch binding;GO:0008270//zinc ion binding;GO:0017124//SH3 domain binding;GO:0061630//ubiquitin protein ligase activity	GO:0006897//endocytosis;GO:0007219//Notch signaling pathway;GO:0007220//Notch receptor processing;GO:0016567//protein ubiquitination;GO:0035220//wing disc development;GO:0045746//negative regulation of Notch signaling pathway;GO:0045747//positive regulation of Notch signaling pathway
Sfur003606	76.373	38.527	30.18	--	Putative uncharacterized protein	-	-	-	-	-	-	-
Sfur003642	1.167	0.347	0.417	--	Putative uncharacterized protein	-	-	-	-	-	-	-
Sfur003655	1.21	0.547	0.65	Rttn	Rotatin	-	-	-	-	GO:0005737//cytoplasm;GO:0005813//centrosome;GO:0005814//centriole;GO:0036064//ciliary basal body	-	GO:0007099//centriole replication;GO:0007368//determination of left/right symmetry;GO:0010457//centriole-centriole cohesion;GO:0032053//ciliary basal body organization
Sfur003658	90.843	35.16	33.483	Smtn	Smoothelin	-	-	-	-	GO:0005737//cytoplasm;GO:0005815//microtubule organizing center;GO:0031941//filamentous actin	GO:0003779//actin binding	GO:0003085//negative regulation of systemic arterial blood pressure;GO:0030036//actin cytoskeleton organization;GO:0060452//positive regulation of cardiac muscle contraction
Sfur003664	1.947	0.777	0.693	Pex23	Tectonin beta-propeller repeat-containing protein	Human Diseases	Infectious diseases	ko05131//Shigellosis	K17988	GO:0000421//autophagosome membrane;GO:0005765//lysosomal membrane;GO:0016021//integral component of membrane	GO:0030246//carbohydrate binding;GO:0032266//phosphatidylinositol-3-phosphate binding	GO:0007031//peroxisome organization
Sfur003666	11.623	5.257	4.89	unc-64	Syntaxin-1A	Human Diseases;Organismal Systems;Organismal Systems;Human Diseases;Genetic Information Processing	Neurodegenerative diseases;Endocrine system;Nervous system;Substance dependence;Folding, sorting and degradation	ko05016//Huntington disease;ko04911//Insulin secretion;ko04721//Synaptic vesicle cycle;ko05031//Amphetamine addiction;ko04130//SNARE interactions in vesicular transport	K04560;K04560;K04560;K04560;K04560	GO:0005765//lysosomal membrane;GO:0005886//plasma membrane;GO:0008021//synaptic vesicle;GO:0012505//endomembrane system;GO:0016021//integral component of membrane;GO:0030672//synaptic vesicle membrane;GO:0031201//SNARE complex;GO:0042734//presynaptic membrane;GO:0043195//terminal bouton;GO:0048787//presynaptic active zone membrane	GO:0000149//SNARE binding;GO:0005484//SNAP receptor activity	GO:0000281//mitotic cytokinesis;GO:0006886//intracellular protein transport;GO:0006887//exocytosis;GO:0006906//vesicle fusion;GO:0007269//neurotransmitter secretion;GO:0007274//neuromuscular synaptic transmission;GO:0007317//regulation of pole plasm oskar mRNA localization;GO:0007349//cellularization;GO:0007482//haltere development;GO:0016081//synaptic vesicle docking;GO:0016192//vesicle-mediated…
Sfur003695	2.487	0.82	1.157	--	Protein singles bar	-	-	-	-	GO:0016021//integral component of membrane	-	GO:0007517//muscle organ development;GO:0007520//myoblast fusion;GO:0007527//adult somatic muscle development
Sfur003704	146.333	14.613	17.29	--	Putative uncharacterized protein	Organismal Systems	Digestive system	ko04974//Protein digestion and absorption	K19721	-	-	-
Sfur003735	9.833	5.15	4.12	Mrm3	rRNA methyltransferase 3, mitochondrial	-	-	-	-	GO:0005739//mitochondrion	GO:0003723//RNA binding;GO:0042802//identical protein binding;GO:0070039//rRNA (guanosine-2'-O-)-methyltransferase activity	-
Sfur003749	8.73	4.277	3.827	rnps1-b	RNA-binding protein with serine-rich domain 1-A	Genetic Information Processing;Genetic Information Processing	Translation;Translation	ko03013//RNA transport;ko03015//mRNA surveillance pathway	K14325;K14325	GO:0005737//cytoplasm;GO:0016607//nuclear speck	GO:0003723//RNA binding	GO:0006397//mRNA processing;GO:0008380//RNA splicing
Sfur003752	7.513	3.083	2.997	--	Putative uncharacterized protein	-	-	-	-	-	-	-
Sfur003758	6.107	2.013	2.107	--	Putative uncharacterized protein	-	-	-	-	-	-	-
Sfur003759	11.073	5.237	5.05	Ssrp	FACT complex subunit Ssrp1	-	-	-	-	GO:0005703//polytene chromosome puff;GO:0005705//polytene chromosome interband;GO:0005730//nucleolus;GO:0005829//cytosol;GO:0035101//FACT complex	GO:0003723//RNA binding;GO:0031492//nucleosomal DNA binding;GO:0043621//protein self-association;GO:0046982//protein heterodimerization activity;GO:0070087//chromo shadow domain binding	GO:0001672//regulation of chromatin assembly or disassembly;GO:0001933//negative regulation of protein phosphorylation;GO:0006260//DNA replication;GO:0006281//DNA repair;GO:0030707//ovarian follicle cell development;GO:0030838//positive regulation of actin filament polymerization;GO:0051101//regulation of DNA binding
Sfur003762	162.097	1.847	1.287	--	Putative uncharacterized protein	-	-	-	-	-	-	-
Sfur003765	15.65	6.417	6.237	--	Solute carrier family 2, facilitated glucose transporter member 4	Human Diseases;Human Diseases;Organismal Systems;Organismal Systems;Organismal Systems;Human Diseases;Organismal Systems;Environmental Information Processing;Human Diseases;Human Diseases;Organismal Systems	Cancers;Infectious diseases;Endocrine system;Endocrine system;Digestive system;Endocrine and metabolic diseases;Endocrine system;Signal transduction;Cancers;Cancers;Endocrine system	ko05200//Pathways in cancer;ko05166//HTLV-I infection;ko04919//Thyroid hormone signaling pathway;ko04922//Glucagon signaling pathway;ko04976//Bile secretion;ko04931//Insulin resistance;ko04911//Insulin secretion;ko04066//HIF-1 signaling pathway;ko05211//Renal cell carcinoma;ko05230//Central carbon metabolism in cancer;ko04920//Adipocytokine signaling pathway	K07299;K07299;K07299;K07299;K07299;K07299;K07299;K07299;K07299;K07299;K07299	GO:0005771//multivesicular body;GO:0005802//trans-Golgi network;GO:0005829//cytosol;GO:0005886//plasma membrane;GO:0005887//integral component of plasma membrane;GO:0005905//coated pit;GO:0009897//external side of plasma membrane;GO:0012505//endomembrane system;GO:0012506//vesicle membrane;GO:0016020//membrane;GO:0016529//sarcoplasmic reticulum;GO:0030136//clathrin-coated vesicle;GO:0030140//tran…	GO:0005355//glucose transmembrane transporter activity;GO:0055056//D-glucose transmembrane transporter activity	GO:0005975//carbohydrate metabolic process;GO:0007611//learning or memory;GO:0007614//short-term memory;GO:0007616//long-term memory;GO:0010021//amylopectin biosynthetic process;GO:0031550//positive regulation of brain-derived neurotrophic factor receptor signaling pathway;GO:0032869//cellular response to insulin stimulus;GO:0042593//glucose homeostasis;GO:0044381//glucose import in response to i…
Sfur003768	7.79	3.213	2.783	Bre1	E3 ubiquitin-protein ligase Bre1	-	-	-	-	GO:0005634//nucleus	GO:0008270//zinc ion binding;GO:0061630//ubiquitin protein ligase activity	GO:0006513//protein monoubiquitination;GO:0007219//Notch signaling pathway;GO:0010390//histone monoubiquitination;GO:0016570//histone modification;GO:0016574//histone ubiquitination
Sfur003772	2	0.447	0.5	--	Putative uncharacterized protein	-	-	-	-	-	-	-
Sfur003784	8.683	3.057	2.857	cyb5d2	Neuferricin	-	-	-	-	GO:0005576//extracellular region;GO:0012505//endomembrane system;GO:0016020//membrane	-	GO:0007399//nervous system development
Sfur003789	17.897	6.06	5.83	NSUN6	tRNA (cytosine(72)-C(5))-methyltransferase NSUN6	-	-	-	-	GO:0005737//cytoplasm;GO:0005829//cytosol	GO:0000049//tRNA binding;GO:0016428//tRNA (cytosine-5-)-methyltransferase activity	GO:0001510//RNA methylation;GO:0002946//tRNA C5-cytosine methylation;GO:0006400//tRNA modification;GO:0030488//tRNA methylation
Sfur003790	5.987	2.587	2.353	--	Putative uncharacterized protein	-	-	-	-	-	-	-
Sfur003791	5.017	1.787	1.96	--	Putative uncharacterized protein	-	-	-	-	-	-	-
Sfur003793	35.203	15.237	15.39	SULT1C4	Luciferin sulfotransferase	-	-	-	-	-	GO:0008146//sulfotransferase activity	-
Sfur003810	30.633	11.297	12.147	--	Putative uncharacterized protein	Human Diseases	Infectious diseases	ko05168//Herpes simplex infection	K09228	-	-	-
Sfur003827	22.27	0.037	0.06	--	Putative uncharacterized protein	-	-	-	-	-	-	-
Sfur003828	16.267	2.07	1.913	phm	Cytochrome P450 306a1	Metabolism	Metabolism of terpenoids and polyketides	ko00981//Insect hormone biosynthesis	K10720	GO:0005737//cytoplasm;GO:0005783//endoplasmic reticulum;GO:0005789//endoplasmic reticulum membrane;GO:0043231//intracellular membrane-bounded organelle	GO:0005506//iron ion binding;GO:0008395//steroid hydroxylase activity;GO:0016712//oxidoreductase activity, acting on paired donors, with incorporation or reduction of molecular oxygen, reduced flavin or flavoprotein as one donor, and incorporation of one atom of oxygen;GO:0020037//heme binding;GO:0035302//ecdysteroid 25-hydroxylase activity	GO:0001700//embryonic development via the syncytial blastoderm;GO:0006082//organic acid metabolic process;GO:0006697//ecdysone biosynthetic process;GO:0006805//xenobiotic metabolic process;GO:0007298//border follicle cell migration;GO:0042738//exogenous drug catabolic process;GO:0048477//oogenesis;GO:0055114//oxidation-reduction process
Sfur003837	4.033	0.54	1.017	--	Putative uncharacterized protein	-	-	-	-	-	-	-
Sfur003875	39.517	0.913	0.75	--	Pro-resilin	Organismal Systems;Organismal Systems;Organismal Systems;Human Diseases;Human Diseases	Digestive system;Immune system;Endocrine system;Infectious diseases;Endocrine and metabolic diseases	ko04974//Protein digestion and absorption;ko04611//Platelet activation;ko04926//Relaxin signaling pathway;ko05146//Amoebiasis;ko04933//AGE-RAGE signaling pathway in diabetic complications	K19720;K19720;K19720;K19720;K19720	GO:0005576//extracellular region;GO:0031012//extracellular matrix;GO:0032992//protein-carbohydrate complex	GO:0008010//structural constituent of chitin-based larval cuticle;GO:0008061//chitin binding;GO:0030023//extracellular matrix constituent conferring elasticity;GO:0042302//structural constituent of cuticle	GO:0040003//chitin-based cuticle development
Sfur003876	9.553	4.97	4.083	--	Decaprenyl-diphosphate synthase subunit 2	Metabolism	Metabolism of terpenoids and polyketides	ko00900//Terpenoid backbone biosynthesis	K12505	GO:0005739//mitochondrion;GO:0005829//cytosol;GO:1990234//transferase complex	GO:0000010//trans-hexaprenyltranstransferase activity;GO:0004659//prenyltransferase activity;GO:0046982//protein heterodimerization activity	GO:0006744//ubiquinone biosynthetic process;GO:0008299//isoprenoid biosynthetic process;GO:0050878//regulation of body fluid levels
Sfur003933	19.733	9.773	9.637	PSMA6	Proteasome subunit alpha type-6	Genetic Information Processing	Folding, sorting and degradation	ko03050//Proteasome	K02730	GO:0000932//cytoplasmic mRNA processing body;GO:0005634//nucleus;GO:0005654//nucleoplasm;GO:0005737//cytoplasm;GO:0005839//proteasome core complex;GO:0005844//polysome;GO:0016363//nuclear matrix;GO:0019773//proteasome core complex, alpha-subunit complex	GO:0003723//RNA binding;GO:0004175//endopeptidase activity;GO:0051059//NF-kappaB binding	GO:0010498//proteasomal protein catabolic process;GO:0010499//proteasomal ubiquitin-independent protein catabolic process;GO:0043161//proteasome-mediated ubiquitin-dependent protein catabolic process;GO:0051092//positive regulation of NF-kappaB transcription factor activity
Sfur003936	1.533	0.52	0.737	--	Putative uncharacterized protein	-	-	-	-	-	-	-
Sfur003979	9.803	0.55	0.5	PNLIPRP2	Pancreatic lipase-related protein 2	Metabolism;Organismal Systems;Metabolism;Organismal Systems;Organismal Systems	Global and overview maps;Digestive system;Lipid metabolism;Digestive system;Digestive system	ko01100//Metabolic pathways;ko04972//Pancreatic secretion;ko00561//Glycerolipid metabolism;ko04977//Vitamin digestion and absorption;ko04975//Fat digestion and absorption	K14073;K14073;K14073;K14073;K14073	GO:0005576//extracellular region;GO:0005615//extracellular space;GO:0016020//membrane	GO:0004620//phospholipase activity;GO:0004806//triglyceride lipase activity;GO:0005509//calcium ion binding;GO:0016298//lipase activity;GO:0047372//acylglycerol lipase activity;GO:0047714//galactolipase activity	GO:0006641//triglyceride metabolic process;GO:0006968//cellular defense response;GO:0009395//phospholipid catabolic process;GO:0009617//response to bacterium;GO:0016042//lipid catabolic process;GO:0019376//galactolipid catabolic process;GO:0019433//triglyceride catabolic process;GO:0034638//phosphatidylcholine catabolic process;GO:0044241//lipid digestion;GO:0044258//intestinal lipid catabolic pr…
Sfur003997	5.64	1.813	2.137	Ser	Protein serrate	Human Diseases;Human Diseases;Environmental Information Processing;Human Diseases;Human Diseases;Environmental Information Processing;Environmental Information Processing;Organismal Systems	Cancers;Infectious diseases;Signal transduction;Cancers;Drug resistance;Signal transduction;Signal transduction;Immune system	ko05200//Pathways in cancer;ko05165//Human papillomavirus infection;ko04371//Apelin signaling pathway;ko05224//Breast cancer;ko01522//Endocrine resistance;ko04330//Notch signaling pathway;ko04668//TNF signaling pathway;ko04658//Th1 and Th2 cell differentiation	K06052;K06052;K06052;K06052;K06052;K06052;K06052;K06052	GO:0005886//plasma membrane;GO:0009986//cell surface;GO:0016021//integral component of membrane;GO:0016324//apical plasma membrane;GO:0030673//axolemma;GO:0045179//apical cortex	GO:0005112//Notch binding;GO:0005509//calcium ion binding;GO:0043208//glycosphingolipid binding;GO:0048018//receptor agonist activity	GO:0007219//Notch signaling pathway;GO:0007423//sensory organ development;GO:0007435//salivary gland morphogenesis;GO:0007436//larval salivary gland morphogenesis;GO:0007476//imaginal disc-derived wing morphogenesis;GO:0007480//imaginal disc-derived leg morphogenesis;GO:0008587//imaginal disc-derived wing margin morphogenesis;GO:0014009//glial cell proliferation;GO:0016330//second mitotic wave in…
Sfur004001	52.36	27.06	24.48	eca	Transmembrane emp24 domain-containing protein eca	-	-	-	-	GO:0005789//endoplasmic reticulum membrane;GO:0016021//integral component of membrane	-	GO:0009953//dorsal/ventral pattern formation
Sfur004042	1.947	0.42	0.557	br	Broad-complex core protein isoforms 1/2/3/4/5	Cellular Processes;Organismal Systems	Cell growth and death;Development	ko04214//Apoptosis - fly;ko04320//Dorso-ventral axis formation	K02174;K02174	GO:0005634//nucleus	GO:0000977//RNA polymerase II regulatory region sequence-specific DNA binding;GO:0003677//DNA binding;GO:0046872//metal ion binding	GO:0001752//compound eye photoreceptor fate commitment;GO:0006357//regulation of transcription from RNA polymerase II promoter;GO:0006914//autophagy;GO:0007458//progression of morphogenetic furrow involved in compound eye morphogenesis;GO:0007562//eclosion;GO:0009608//response to symbiont;GO:0010629//negative regulation of gene expression;GO:0030707//ovarian follicle cell development;GO:0035070//…
Sfur004083	2.513	0.847	0.603	Morf4l1	Mortality factor 4-like protein 1	-	-	-	-	GO:0000123//histone acetyltransferase complex;GO:0016580//Sin3 complex;GO:0016607//nuclear speck;GO:0035267//NuA4 histone acetyltransferase complex	GO:0003682//chromatin binding;GO:0047485//protein N-terminus binding	GO:0000724//double-strand break repair via homologous recombination;GO:0006342//chromatin silencing;GO:0008283//cell proliferation;GO:0016573//histone acetylation;GO:0016575//histone deacetylation;GO:0040008//regulation of growth;GO:0043967//histone H4 acetylation;GO:0043968//histone H2A acetylation
Sfur004104	22.697	9.407	12.193	Slc7a1	High affinity cationic amino acid transporter 1	-	-	-	-	GO:0005886//plasma membrane;GO:0009925//basal plasma membrane;GO:0016021//integral component of membrane;GO:0016323//basolateral plasma membrane;GO:0016324//apical plasma membrane;GO:0032991//macromolecular complex	GO:0000064//L-ornithine transmembrane transporter activity;GO:0005290//L-histidine transmembrane transporter activity;GO:0015171//amino acid transmembrane transporter activity;GO:0015174//basic amino acid transmembrane transporter activity;GO:0015181//arginine transmembrane transporter activity;GO:0015189//L-lysine transmembrane transporter activity;GO:0061459//L-arginine transmembrane transporte…	GO:0006865//amino acid transport;GO:0015807//L-amino acid transport;GO:0015809//arginine transport;GO:0015819//lysine transport;GO:0015822//ornithine transport;GO:0032006//regulation of TOR signaling;GO:0042102//positive regulation of T cell proliferation;GO:0089718//amino acid import across plasma membrane;GO:0097638//L-arginine import across plasma membrane;GO:1903352//L-ornithine transmembrane…
Sfur004107	2.633	1.17	1.277	--	Putative uncharacterized protein	-	-	-	-	-	-	-
Sfur004109	1.22	0.02	0.05	ADCY9	Adenylate cyclase type 9	Metabolism;Organismal Systems;Human Diseases;Environmental Information Processing;Environmental Information Processing;Environmental Information Processing;Human Diseases;Environmental Information Processing;Metabolism;Organismal Systems;Environmental Information Processing;Human Diseases;Organismal Systems;Human Diseases;Organismal Systems;Human Diseases;Organismal Systems;Organismal Systems;Org…	Global and overview maps;Environmental adaptation;Cancers;Signal transduction;Signal transduction;Signal transduction;Infectious diseases;Signal transduction;Nucleotide metabolism;Endocrine system;Signal transduction;Infectious diseases;Circulatory system;Endocrine and metabolic diseases;Digestive system;Cardiovascular diseases;Circulatory system;Development and regeneration;Endocrine system;Immu…	ko01100//Metabolic pathways;ko04714//Thermogenesis;ko05200//Pathways in cancer;ko04024//cAMP signaling pathway;ko04020//Calcium signaling pathway;ko04015//Rap1 signaling pathway;ko05166//HTLV-I infection;ko04022//cGMP - PKG signaling pathway;ko00230//Purine metabolism;ko04921//Oxytocin signaling pathway;ko04371//Apelin signaling pathway;ko05163//Human cytomegalovirus infection;ko04261//Adrenergic…	K08049;K08049;K08049;K08049;K08049;K08049;K08049;K08049;K08049;K08049;K08049;K08049;K08049;K08049;K08049;K08049;K08049;K08049;K08049;K08049;K08049;K08049;K08049;K08049;K08049;K08049;K08049;K08049;K08049;K08049;K08049;K08049;K08049;K08049;K08049;K08049;K08049;K08049;K08049;K08049;K08049;K08049;K08049;K08049;K08049;K08049;K08049;K08049;K08049;K08049;K08049;K08049	GO:0005887//integral component of plasma membrane;GO:0016021//integral component of membrane	GO:0004016//adenylate cyclase activity;GO:0005524//ATP binding;GO:0046872//metal ion binding	GO:0006171//cAMP biosynthetic process;GO:0007189//adenylate cyclase-activating G-protein coupled receptor signaling pathway;GO:0071880//adenylate cyclase-activating adrenergic receptor signaling pathway
Sfur004116	70.423	41.79	34.61	RER1	Protein RER1	-	-	-	-	GO:0005783//endoplasmic reticulum;GO:0005793//endoplasmic reticulum-Golgi intermediate compartment;GO:0005886//plasma membrane;GO:0009986//cell surface;GO:0030173//integral component of Golgi membrane	GO:0033130//acetylcholine receptor binding	GO:0006621//protein retention in ER lumen;GO:0006890//retrograde vesicle-mediated transport, Golgi to ER;GO:0071340//skeletal muscle acetylcholine-gated channel clustering;GO:1903078//positive regulation of protein localization to plasma membrane
Sfur004132	10.827	5.933	4.953	Usp5	Ubiquitin carboxyl-terminal hydrolase 5	-	-	-	-	GO:0005634//nucleus;GO:0005829//cytosol	GO:0004197//cysteine-type endopeptidase activity;GO:0004843//thiol-dependent ubiquitin-specific protease activity;GO:0008270//zinc ion binding;GO:0043130//ubiquitin binding	GO:0006511//ubiquitin-dependent protein catabolic process;GO:0016579//protein deubiquitination;GO:0032436//positive regulation of proteasomal ubiquitin-dependent protein catabolic process;GO:0071108//protein K48-linked deubiquitination
Sfur004148	7.527	3.663	3.927	--	C1GALT1-specific chaperone 1-like protein	Metabolism;Metabolism;Metabolism	Global and overview maps;Glycan biosynthesis and metabolism;Glycan biosynthesis and metabolism	ko01100//Metabolic pathways;ko00514//Other types of O-glycan biosynthesis;ko00512//Mucin type O-glycan biosynthesis	K00731;K00731;K00731	GO:0016021//integral component of membrane	GO:0016263//glycoprotein-N-acetylgalactosamine 3-beta-galactosyltransferase activity	GO:0016267//O-glycan processing, core 1
Sfur004150	29.253	12.44	10.393	Ptchd3	Patched domain-containing protein 3	Cellular Processes;Organismal Systems	Transport and catabolism;Digestive system	ko04142//Lysosome;ko04979//Cholesterol metabolism	K12385;K12385	GO:0016020//membrane;GO:0016021//integral component of membrane;GO:0097225//sperm midpiece	-	-
Sfur004154	7.263	3.43	3.187	melt	Protein melted	-	-	-	-	GO:0005886//plasma membrane	GO:0010314//phosphatidylinositol-5-phosphate binding;GO:0035091//phosphatidylinositol binding	GO:0001708//cell fate specification;GO:0006629//lipid metabolic process;GO:0009267//cellular response to starvation;GO:0009966//regulation of signal transduction;GO:0031323//regulation of cellular metabolic process;GO:0043433//negative regulation of sequence-specific DNA binding transcription factor activity;GO:0045464//R8 cell fate specification;GO:0046628//positive regulation of insulin recepto…
Sfur004159	15.683	7.027	5.987	DCTN2-p50	Dynactin subunit 2	Human Diseases;Organismal Systems	Neurodegenerative diseases;Excretory system	ko05016//Huntington disease;ko04962//Vasopressin-regulated water reabsorption	K10424;K10424	GO:0005737//cytoplasm;GO:0005869//dynactin complex;GO:0005874//microtubule;GO:0016020//membrane;GO:0030286//dynein complex;GO:0031982//vesicle	GO:0003774//motor activity	GO:0007052//mitotic spindle organization;GO:0007080//mitotic metaphase plate congression
Sfur004192	4.317	2.193	2.133	Hecw2	E3 ubiquitin-protein ligase HECW2	-	-	-	-	GO:0005737//cytoplasm;GO:0072686//mitotic spindle	GO:0061630//ubiquitin protein ligase activity	GO:0000209//protein polyubiquitination;GO:0006511//ubiquitin-dependent protein catabolic process;GO:0016567//protein ubiquitination;GO:0030071//regulation of mitotic metaphase/anaphase transition;GO:0043161//proteasome-mediated ubiquitin-dependent protein catabolic process;GO:0045732//positive regulation of protein catabolic process;GO:0048814//regulation of dendrite morphogenesis;GO:2000650//neg…
Sfur004225	13.173	5.803	7.103	CAMTA1	Calmodulin-binding transcription activator 1	-	-	-	-	GO:0005634//nucleus;GO:0005730//nucleolus;GO:0005829//cytosol	GO:0003690//double-stranded DNA binding;GO:0003712//transcription cofactor activity;GO:0043565//sequence-specific DNA binding	GO:0006357//regulation of transcription from RNA polymerase II promoter;GO:0035307//positive regulation of protein dephosphorylation;GO:0045944//positive regulation of transcription from RNA polymerase II promoter;GO:0050885//neuromuscular process controlling balance;GO:0070886//positive regulation of calcineurin-NFAT signaling cascade
Sfur004248	63.803	25.103	26.13	AP2M1	AP-2 complex subunit mu	Human Diseases;Cellular Processes;Organismal Systems;Organismal Systems	Neurodegenerative diseases;Transport and catabolism;Nervous system;Excretory system	ko05016//Huntington disease;ko04144//Endocytosis;ko04721//Synaptic vesicle cycle;ko04961//Endocrine and other factor-regulated calcium reabsorption	K11826;K11826;K11826;K11826	GO:0030122//AP-2 adaptor complex;GO:0031410//cytoplasmic vesicle;GO:0043231//intracellular membrane-bounded organelle	GO:0008289//lipid binding;GO:0035615//clathrin adaptor activity	GO:0006886//intracellular protein transport;GO:0006897//endocytosis;GO:0016192//vesicle-mediated transport;GO:0072583//clathrin-mediated endocytosis
Sfur004267	2.25	0.443	0.77	Morf4l1	Mortality factor 4-like protein 1	-	-	-	-	GO:0000123//histone acetyltransferase complex;GO:0016580//Sin3 complex;GO:0016607//nuclear speck;GO:0035267//NuA4 histone acetyltransferase complex	GO:0003682//chromatin binding;GO:0047485//protein N-terminus binding	GO:0000724//double-strand break repair via homologous recombination;GO:0006342//chromatin silencing;GO:0008283//cell proliferation;GO:0016573//histone acetylation;GO:0016575//histone deacetylation;GO:0040008//regulation of growth;GO:0043967//histone H4 acetylation;GO:0043968//histone H2A acetylation
Sfur004288	10.993	4.893	4.437	inip	SOSS complex subunit C	-	-	-	-	GO:0005634//nucleus;GO:0070876//SOSS complex	-	GO:0006281//DNA repair;GO:0006974//cellular response to DNA damage stimulus;GO:0010212//response to ionizing radiation
Sfur004295	30.46	12.587	13.62	--	Fibulin-7	-	-	-	-	GO:0005576//extracellular region;GO:0005925//focal adhesion	GO:0005509//calcium ion binding;GO:0008201//heparin binding	GO:0007155//cell adhesion
Sfur004330	746.927	99.76	65.437	EbpIII	Ejaculatory bulb-specific protein 3	-	-	-	-	GO:0005576//extracellular region	-	GO:0007552//metamorphosis;GO:0007610//behavior;GO:0009615//response to virus;GO:0042628//mating plug formation
Sfur004335	12.097	3.893	4.1	MYO3A	Myosin-IIIa	Organismal Systems	Sensory system	ko04745//Phototransduction - fly	K08834	GO:0005737//cytoplasm;GO:0016459//myosin complex;GO:0030175//filopodium;GO:0031941//filamentous actin;GO:0032426//stereocilium tip;GO:0032433//filopodium tip	GO:0000146//microfilament motor activity;GO:0003779//actin binding;GO:0004672//protein kinase activity;GO:0004674//protein serine/threonine kinase activity;GO:0005516//calmodulin binding;GO:0005524//ATP binding;GO:0030898//actin-dependent ATPase activity;GO:0043531//ADP binding;GO:0060002//plus-end directed microfilament motor activity	GO:0007601//visual perception;GO:0007605//sensory perception of sound;GO:0046777//protein autophosphorylation;GO:0050896//response to stimulus;GO:0090103//cochlea morphogenesis
Sfur004336	18.563	0.2	0.167	--	Ejaculatory bulb-specific protein 3	-	-	-	-	GO:0005576//extracellular region	-	GO:0007552//metamorphosis;GO:0007610//behavior;GO:0009615//response to virus;GO:0042628//mating plug formation
Sfur004373	6.16	2.32	2.197	Iqgap1	Ras GTPase-activating-like protein IQGAP1	Cellular Processes;Human Diseases;Cellular Processes	Cell motility;Cancers;Cellular community - eukaryotes	ko04810//Regulation of actin cytoskeleton;ko05205//Proteoglycans in cancer;ko04520//Adherens junction	K16848;K16848;K16848	GO:0001726//ruffle;GO:0005634//nucleus;GO:0005737//cytoplasm;GO:0005874//microtubule;GO:0005886//plasma membrane;GO:0005911//cell-cell junction;GO:0005925//focal adhesion;GO:0016328//lateral plasma membrane;GO:0030424//axon;GO:0030426//growth cone;GO:0030496//midbody;GO:0030864//cortical actin cytoskeleton;GO:0031234//extrinsic component of cytoplasmic side of plasma membrane;GO:0031252//cell lea…	GO:0005078//MAP-kinase scaffold activity;GO:0005096//GTPase activator activity;GO:0005509//calcium ion binding;GO:0005516//calmodulin binding;GO:0005547//phosphatidylinositol-3,4,5-trisphosphate binding;GO:0017016//Ras GTPase binding;GO:0017048//Rho GTPase binding;GO:0019901//protein kinase binding;GO:0019903//protein phosphatase binding;GO:0019904//protein domain specific binding;GO:0031267//sma…	GO:0001817//regulation of cytokine production;GO:0007173//epidermal growth factor receptor signaling pathway;GO:0007346//regulation of mitotic cell cycle;GO:0008543//fibroblast growth factor receptor signaling pathway;GO:0010761//fibroblast migration;GO:0016477//cell migration;GO:0032956//regulation of actin cytoskeleton organization;GO:0035305//negative regulation of dephosphorylation;GO:0036120…
Sfur004383	15.44	8.413	7.347	PPWD1	Peptidylprolyl isomerase domain and WD repeat-containing protein 1	-	-	-	-	GO:0016604//nuclear body;GO:0071013//catalytic step 2 spliceosome	GO:0003755//peptidyl-prolyl cis-trans isomerase activity;GO:0016018//cyclosporin A binding	GO:0000413//protein peptidyl-prolyl isomerization;GO:0006397//mRNA processing;GO:0008380//RNA splicing
Sfur004404	178.467	94.373	80.423	PSMA4	Proteasome subunit alpha type-4	Genetic Information Processing	Folding, sorting and degradation	ko03050//Proteasome	K02728	GO:0000932//cytoplasmic mRNA processing body;GO:0005634//nucleus;GO:0005654//nucleoplasm;GO:0005737//cytoplasm;GO:0005829//cytosol;GO:0005839//proteasome core complex;GO:0019773//proteasome core complex, alpha-subunit complex	GO:0004175//endopeptidase activity;GO:0004298//threonine-type endopeptidase activity	GO:0010498//proteasomal protein catabolic process;GO:0010499//proteasomal ubiquitin-independent protein catabolic process;GO:0043161//proteasome-mediated ubiquitin-dependent protein catabolic process
Sfur004410	6.253	2.347	2.427	FDPS	Farnesyl pyrophosphate synthase	Metabolism;Human Diseases;Human Diseases;Metabolism	Global and overview maps;Infectious diseases;Infectious diseases;Metabolism of terpenoids and polyketides	ko01100//Metabolic pathways;ko05166//HTLV-I infection;ko05164//Influenza A;ko00900//Terpenoid backbone biosynthesis	K00787;K00787;K00787;K00787	GO:0005737//cytoplasm	GO:0004161//dimethylallyltranstransferase activity;GO:0004337//geranyltranstransferase activity;GO:0046872//metal ion binding	GO:0006695//cholesterol biosynthetic process;GO:0033384//geranyl diphosphate biosynthetic process;GO:0045337//farnesyl diphosphate biosynthetic process
Sfur004421	13.31	5.33	4.583	Mzt1	Mitotic-spindle organizing protein 1	-	-	-	-	GO:0005813//centrosome;GO:0005819//spindle;GO:0005829//cytosol;GO:0008274//gamma-tubulin ring complex;GO:0031021//interphase microtubule organizing center	-	GO:0033566//gamma-tubulin complex localization;GO:0051415//interphase microtubule nucleation by interphase microtubule organizing center;GO:0090307//mitotic spindle assembly
Sfur004433	5.333	2.257	2.447	--	Putative uncharacterized protein	-	-	-	-	-	-	-
Sfur004450	9.827	2.47	1.953	TMED6	Transmembrane emp24 domain-containing protein 6	-	-	-	-	GO:0005783//endoplasmic reticulum;GO:0005789//endoplasmic reticulum membrane;GO:0005793//endoplasmic reticulum-Golgi intermediate compartment;GO:0005794//Golgi apparatus;GO:0016021//integral component of membrane;GO:0030134//ER to Golgi transport vesicle	-	GO:0006886//intracellular protein transport;GO:0006888//ER to Golgi vesicle-mediated transport;GO:0007030//Golgi organization
Sfur004455	151.273	51.377	58.623	Pxt	Chorion peroxidase	-	-	-	-	GO:0005615//extracellular space	GO:0004601//peroxidase activity;GO:0004666//prostaglandin-endoperoxide synthase activity;GO:0020037//heme binding;GO:0046872//metal ion binding	GO:0001516//prostaglandin biosynthetic process;GO:0006979//response to oxidative stress;GO:0007304//chorion-containing eggshell formation;GO:0007306//eggshell chorion assembly;GO:0030707//ovarian follicle cell development;GO:0042743//hydrogen peroxide metabolic process;GO:0042744//hydrogen peroxide catabolic process
Sfur004459	19.917	6.02	5.48	SGSH	N-sulphoglucosamine sulphohydrolase	Metabolism;Cellular Processes;Metabolism	Global and overview maps;Transport and catabolism;Glycan biosynthesis and metabolism	ko01100//Metabolic pathways;ko04142//Lysosome;ko00531//Glycosaminoglycan degradation	K01565;K01565;K01565	GO:0005764//lysosome;GO:0043202//lysosomal lumen;GO:0070062//extracellular exosome	GO:0005539//glycosaminoglycan binding;GO:0008449//N-acetylglucosamine-6-sulfatase activity;GO:0008484//sulfuric ester hydrolase activity;GO:0016250//N-sulfoglucosamine sulfohydrolase activity;GO:0046872//metal ion binding	GO:0006027//glycosaminoglycan catabolic process;GO:0030200//heparan sulfate proteoglycan catabolic process
Sfur004483	12.933	5.143	7.113	lft	Protein limb expression 1 homolog	Environmental Information Processing	Signal transduction	ko04391//Hippo signaling pathway -fly	K16673	GO:0005737//cytoplasm;GO:0005829//cytosol;GO:0016324//apical plasma membrane;GO:0035003//subapical complex	-	GO:0006914//autophagy;GO:0007476//imaginal disc-derived wing morphogenesis;GO:0097352//autophagosome maturation
Sfur004484	34.98	16.143	16.073	Hm13	Minor histocompatibility antigen H13	-	-	-	-	GO:0005783//endoplasmic reticulum;GO:0005789//endoplasmic reticulum membrane;GO:0005791//rough endoplasmic reticulum;GO:0005886//plasma membrane;GO:0009986//cell surface;GO:0036513//Derlin-1 retrotranslocation complex;GO:0071458//integral component of cytoplasmic side of endoplasmic reticulum membrane;GO:0071556//integral component of lumenal side of endoplasmic reticulum membrane	GO:0008233//peptidase activity;GO:0031625//ubiquitin protein ligase binding;GO:0042500//aspartic endopeptidase activity, intramembrane cleaving;GO:0042803//protein homodimerization activity	GO:0006465//signal peptide processing;GO:0033619//membrane protein proteolysis;GO:1904211//membrane protein proteolysis involved in retrograde protein transport, ER to cytosol
Sfur004486	12.44	4.623	4.447	Set	Protein SET	-	-	-	-	GO:0005634//nucleus	GO:0003682//chromatin binding;GO:0042393//histone binding	GO:0006334//nucleosome assembly
Sfur004491	32.93	18.707	15.473	POLR2E	DNA-directed RNA polymerases I, II, and III subunit RPABC1	Human Diseases;Genetic Information Processing;Organismal Systems	Neurodegenerative diseases;Transcription;Immune system	ko05016//Huntington disease;ko03020//RNA polymerase;ko04623//Cytosolic DNA-sensing pathway	K03013;K03013;K03013	GO:0005634//nucleus;GO:0005665//DNA-directed RNA polymerase II, core complex	GO:0003677//DNA binding;GO:0003899//DNA-directed RNA polymerase activity	GO:0006366//transcription from RNA polymerase II promoter
Sfur004497	6.513	2.927	2.7	TCTEX1D2	Tctex1 domain-containing protein 2	-	-	-	-	GO:0005868//cytoplasmic dynein complex;GO:0005929//cilium	-	GO:0035721//intraciliary retrograde transport
Sfur004509	16.81	2.41	1.74	--	Putative uncharacterized protein	-	-	-	-	-	-	-
Sfur004512	1.6	0.413	0.807	--	Putative uncharacterized protein	-	-	-	-	-	-	-
Sfur004514	0.743	0	0.007	--	Putative nuclease HARBI1	-	-	-	-	GO:0005634//nucleus;GO:0005737//cytoplasm	GO:0004518//nuclease activity;GO:0046872//metal ion binding	-
Sfur004563	11.923	3.537	3.86	TK2	Thymidine kinase 2, mitochondrial	-	-	-	-	GO:0005739//mitochondrion	GO:0004797//thymidine kinase activity;GO:0005524//ATP binding	GO:0071897//DNA biosynthetic process
Sfur004598	17.307	6.123	6.44	-	-	-	-	-	-	-	-	-
Sfur004599	8.187	3.06	3.277	use1	Vesicle transport protein USE1	Genetic Information Processing	Folding, sorting and degradation	ko04130//SNARE interactions in vesicular transport	K08507	GO:0005783//endoplasmic reticulum;GO:0005789//endoplasmic reticulum membrane;GO:0016021//integral component of membrane;GO:0031201//SNARE complex	GO:0005484//SNAP receptor activity	GO:0006890//retrograde vesicle-mediated transport, Golgi to ER;GO:0015031//protein transport
Sfur004613	5.753	2.943	2.84	PIG-K	Putative GPI-anchor transamidase	Metabolism;Metabolism	Global and overview maps;Glycan biosynthesis and metabolism	ko01100//Metabolic pathways;ko00563//Glycosylphosphatidylinositol(GPI)-anchor biosynthesis	K05290;K05290	GO:0042765//GPI-anchor transamidase complex	GO:0003923//GPI-anchor transamidase activity	GO:0016255//attachment of GPI anchor to protein;GO:0034394//protein localization to cell surface
Sfur004614	1.623	0.703	0.793	retn	Protein dead ringer	-	-	-	-	GO:0005634//nucleus	GO:0000976//transcription regulatory region sequence-specific DNA binding;GO:0000977//RNA polymerase II regulatory region sequence-specific DNA binding;GO:0001228//transcriptional activator activity, RNA polymerase II transcription regulatory region sequence-specific binding;GO:0003677//DNA binding;GO:0070491//repressing transcription factor binding	GO:0000122//negative regulation of transcription from RNA polymerase II promoter;GO:0006357//regulation of transcription from RNA polymerase II promoter;GO:0007411//axon guidance;GO:0007431//salivary gland development;GO:0007517//muscle organ development;GO:0008049//male courtship behavior;GO:0009880//embryonic pattern specification;GO:0009952//anterior/posterior pattern specification;GO:0042063/…
Sfur004626	4.793	2.377	2.947	--	Putative uncharacterized protein	-	-	-	-	-	-	-
Sfur004627	15.063	7.313	7.363	Stag1	Cohesin subunit SA-1	Cellular Processes	Cell growth and death	ko04110//Cell cycle	K06671	GO:0000785//chromatin;GO:0005634//nucleus;GO:0005654//nucleoplasm;GO:0008278//cohesin complex;GO:0016363//nuclear matrix;GO:0016604//nuclear body;GO:0097431//mitotic spindle pole	GO:0003682//chromatin binding	GO:0007062//sister chromatid cohesion;GO:0051301//cell division;GO:0090307//mitotic spindle assembly
Sfur004630	5.41	1.683	1.207	--	Putative uncharacterized protein	-	-	-	-	-	-	-
[truncated: 2,591 more rows]

## Sheet: lncRNA
profile 0
id	PE	DE	AE	Symbol	Description
[truncated: 809 more rows]
