# Supplementary material for: Interaction Analysis of lncRNA and mRNA Based on the Full-Length Transcriptome of the Nymph-to-Adult Developmental Transition of Sogatella furcifera
Source: Insects. 2023 Mar 23;14(4):308. doi: 10.3390/insects14040308 (PMC10141146; doi:10.3390/insects14040308)
Supplement: Supplementary file 1 [file insects-14-00308-s001.zip › Table S6. Co-expressed network analysis of differentially expressed lncRNA and mRNA..xls]

lncRNA_id	GeneID	cor	p_value	Symbol	Description	KEGG_A_class	KEGG_B_class	Pathway	K_ID	GO Component	GO Function	GO Process
MSTRG.10749.1	Sfur000207	0.983429963	1.90E-06	HMGCS1	Hydroxymethylglutaryl-CoA synthase, cytoplasmic	Metabolism;Organismal Systems;Metabolism;Metabolism;Metabolism;Metabolism	Global and overview maps;Endocrine system;Amino acid metabolism;Metabolism of terpenoids and polyketides;Carbohydrate metabolism;Lipid metabolism	ko01100//Metabolic pathways;ko03320//PPAR signaling pathway;ko00280//Valine, leucine and isoleucine degradation;ko00900//Terpenoid backbone biosynthesis;ko00650//Butanoate metabolism;ko00072//Synthesis and degradation of ketone bodies	K01641;K01641;K01641;K01641;K01641;K01641	GO:0005737//cytoplasm	GO:0004421//hydroxymethylglutaryl-CoA synthase activity;GO:0042803//protein homodimerization activity	GO:0006695//cholesterol biosynthetic process;GO:0008299//isoprenoid biosynthetic process
MSTRG.11800.2	Sfur000207	0.994007306	5.45E-08	HMGCS1	Hydroxymethylglutaryl-CoA synthase, cytoplasmic	Metabolism;Organismal Systems;Metabolism;Metabolism;Metabolism;Metabolism	Global and overview maps;Endocrine system;Amino acid metabolism;Metabolism of terpenoids and polyketides;Carbohydrate metabolism;Lipid metabolism	ko01100//Metabolic pathways;ko03320//PPAR signaling pathway;ko00280//Valine, leucine and isoleucine degradation;ko00900//Terpenoid backbone biosynthesis;ko00650//Butanoate metabolism;ko00072//Synthesis and degradation of ketone bodies	K01641;K01641;K01641;K01641;K01641;K01641	GO:0005737//cytoplasm	GO:0004421//hydroxymethylglutaryl-CoA synthase activity;GO:0042803//protein homodimerization activity	GO:0006695//cholesterol biosynthetic process;GO:0008299//isoprenoid biosynthetic process
MSTRG.12083.1	Sfur000207	0.989960568	3.31E-07	HMGCS1	Hydroxymethylglutaryl-CoA synthase, cytoplasmic	Metabolism;Organismal Systems;Metabolism;Metabolism;Metabolism;Metabolism	Global and overview maps;Endocrine system;Amino acid metabolism;Metabolism of terpenoids and polyketides;Carbohydrate metabolism;Lipid metabolism	ko01100//Metabolic pathways;ko03320//PPAR signaling pathway;ko00280//Valine, leucine and isoleucine degradation;ko00900//Terpenoid backbone biosynthesis;ko00650//Butanoate metabolism;ko00072//Synthesis and degradation of ketone bodies	K01641;K01641;K01641;K01641;K01641;K01641	GO:0005737//cytoplasm	GO:0004421//hydroxymethylglutaryl-CoA synthase activity;GO:0042803//protein homodimerization activity	GO:0006695//cholesterol biosynthetic process;GO:0008299//isoprenoid biosynthetic process
MSTRG.12179.1	Sfur000207	0.98233092	2.37E-06	HMGCS1	Hydroxymethylglutaryl-CoA synthase, cytoplasmic	Metabolism;Organismal Systems;Metabolism;Metabolism;Metabolism;Metabolism	Global and overview maps;Endocrine system;Amino acid metabolism;Metabolism of terpenoids and polyketides;Carbohydrate metabolism;Lipid metabolism	ko01100//Metabolic pathways;ko03320//PPAR signaling pathway;ko00280//Valine, leucine and isoleucine degradation;ko00900//Terpenoid backbone biosynthesis;ko00650//Butanoate metabolism;ko00072//Synthesis and degradation of ketone bodies	K01641;K01641;K01641;K01641;K01641;K01641	GO:0005737//cytoplasm	GO:0004421//hydroxymethylglutaryl-CoA synthase activity;GO:0042803//protein homodimerization activity	GO:0006695//cholesterol biosynthetic process;GO:0008299//isoprenoid biosynthetic process
MSTRG.19109.1	Sfur000207	0.985785989	1.11E-06	HMGCS1	Hydroxymethylglutaryl-CoA synthase, cytoplasmic	Metabolism;Organismal Systems;Metabolism;Metabolism;Metabolism;Metabolism	Global and overview maps;Endocrine system;Amino acid metabolism;Metabolism of terpenoids and polyketides;Carbohydrate metabolism;Lipid metabolism	ko01100//Metabolic pathways;ko03320//PPAR signaling pathway;ko00280//Valine, leucine and isoleucine degradation;ko00900//Terpenoid backbone biosynthesis;ko00650//Butanoate metabolism;ko00072//Synthesis and degradation of ketone bodies	K01641;K01641;K01641;K01641;K01641;K01641	GO:0005737//cytoplasm	GO:0004421//hydroxymethylglutaryl-CoA synthase activity;GO:0042803//protein homodimerization activity	GO:0006695//cholesterol biosynthetic process;GO:0008299//isoprenoid biosynthetic process
MSTRG.32068.1	Sfur000207	0.99002082	3.24E-07	HMGCS1	Hydroxymethylglutaryl-CoA synthase, cytoplasmic	Metabolism;Organismal Systems;Metabolism;Metabolism;Metabolism;Metabolism	Global and overview maps;Endocrine system;Amino acid metabolism;Metabolism of terpenoids and polyketides;Carbohydrate metabolism;Lipid metabolism	ko01100//Metabolic pathways;ko03320//PPAR signaling pathway;ko00280//Valine, leucine and isoleucine degradation;ko00900//Terpenoid backbone biosynthesis;ko00650//Butanoate metabolism;ko00072//Synthesis and degradation of ketone bodies	K01641;K01641;K01641;K01641;K01641;K01641	GO:0005737//cytoplasm	GO:0004421//hydroxymethylglutaryl-CoA synthase activity;GO:0042803//protein homodimerization activity	GO:0006695//cholesterol biosynthetic process;GO:0008299//isoprenoid biosynthetic process
MSTRG.33279.1	Sfur000207	0.992216838	1.36E-07	HMGCS1	Hydroxymethylglutaryl-CoA synthase, cytoplasmic	Metabolism;Organismal Systems;Metabolism;Metabolism;Metabolism;Metabolism	Global and overview maps;Endocrine system;Amino acid metabolism;Metabolism of terpenoids and polyketides;Carbohydrate metabolism;Lipid metabolism	ko01100//Metabolic pathways;ko03320//PPAR signaling pathway;ko00280//Valine, leucine and isoleucine degradation;ko00900//Terpenoid backbone biosynthesis;ko00650//Butanoate metabolism;ko00072//Synthesis and degradation of ketone bodies	K01641;K01641;K01641;K01641;K01641;K01641	GO:0005737//cytoplasm	GO:0004421//hydroxymethylglutaryl-CoA synthase activity;GO:0042803//protein homodimerization activity	GO:0006695//cholesterol biosynthetic process;GO:0008299//isoprenoid biosynthetic process
MSTRG.33772.1	Sfur000207	0.992663831	1.11E-07	HMGCS1	Hydroxymethylglutaryl-CoA synthase, cytoplasmic	Metabolism;Organismal Systems;Metabolism;Metabolism;Metabolism;Metabolism	Global and overview maps;Endocrine system;Amino acid metabolism;Metabolism of terpenoids and polyketides;Carbohydrate metabolism;Lipid metabolism	ko01100//Metabolic pathways;ko03320//PPAR signaling pathway;ko00280//Valine, leucine and isoleucine degradation;ko00900//Terpenoid backbone biosynthesis;ko00650//Butanoate metabolism;ko00072//Synthesis and degradation of ketone bodies	K01641;K01641;K01641;K01641;K01641;K01641	GO:0005737//cytoplasm	GO:0004421//hydroxymethylglutaryl-CoA synthase activity;GO:0042803//protein homodimerization activity	GO:0006695//cholesterol biosynthetic process;GO:0008299//isoprenoid biosynthetic process
MSTRG.34229.1	Sfur000207	0.989566326	3.78E-07	HMGCS1	Hydroxymethylglutaryl-CoA synthase, cytoplasmic	Metabolism;Organismal Systems;Metabolism;Metabolism;Metabolism;Metabolism	Global and overview maps;Endocrine system;Amino acid metabolism;Metabolism of terpenoids and polyketides;Carbohydrate metabolism;Lipid metabolism	ko01100//Metabolic pathways;ko03320//PPAR signaling pathway;ko00280//Valine, leucine and isoleucine degradation;ko00900//Terpenoid backbone biosynthesis;ko00650//Butanoate metabolism;ko00072//Synthesis and degradation of ketone bodies	K01641;K01641;K01641;K01641;K01641;K01641	GO:0005737//cytoplasm	GO:0004421//hydroxymethylglutaryl-CoA synthase activity;GO:0042803//protein homodimerization activity	GO:0006695//cholesterol biosynthetic process;GO:0008299//isoprenoid biosynthetic process
MSTRG.5073.2	Sfur000207	0.983180664	2.00E-06	HMGCS1	Hydroxymethylglutaryl-CoA synthase, cytoplasmic	Metabolism;Organismal Systems;Metabolism;Metabolism;Metabolism;Metabolism	Global and overview maps;Endocrine system;Amino acid metabolism;Metabolism of terpenoids and polyketides;Carbohydrate metabolism;Lipid metabolism	ko01100//Metabolic pathways;ko03320//PPAR signaling pathway;ko00280//Valine, leucine and isoleucine degradation;ko00900//Terpenoid backbone biosynthesis;ko00650//Butanoate metabolism;ko00072//Synthesis and degradation of ketone bodies	K01641;K01641;K01641;K01641;K01641;K01641	GO:0005737//cytoplasm	GO:0004421//hydroxymethylglutaryl-CoA synthase activity;GO:0042803//protein homodimerization activity	GO:0006695//cholesterol biosynthetic process;GO:0008299//isoprenoid biosynthetic process
MSTRG.833.2	Sfur000207	0.985736825	1.13E-06	HMGCS1	Hydroxymethylglutaryl-CoA synthase, cytoplasmic	Metabolism;Organismal Systems;Metabolism;Metabolism;Metabolism;Metabolism	Global and overview maps;Endocrine system;Amino acid metabolism;Metabolism of terpenoids and polyketides;Carbohydrate metabolism;Lipid metabolism	ko01100//Metabolic pathways;ko03320//PPAR signaling pathway;ko00280//Valine, leucine and isoleucine degradation;ko00900//Terpenoid backbone biosynthesis;ko00650//Butanoate metabolism;ko00072//Synthesis and degradation of ketone bodies	K01641;K01641;K01641;K01641;K01641;K01641	GO:0005737//cytoplasm	GO:0004421//hydroxymethylglutaryl-CoA synthase activity;GO:0042803//protein homodimerization activity	GO:0006695//cholesterol biosynthetic process;GO:0008299//isoprenoid biosynthetic process
MSTRG.8569.3	Sfur000207	0.985720068	1.13E-06	HMGCS1	Hydroxymethylglutaryl-CoA synthase, cytoplasmic	Metabolism;Organismal Systems;Metabolism;Metabolism;Metabolism;Metabolism	Global and overview maps;Endocrine system;Amino acid metabolism;Metabolism of terpenoids and polyketides;Carbohydrate metabolism;Lipid metabolism	ko01100//Metabolic pathways;ko03320//PPAR signaling pathway;ko00280//Valine, leucine and isoleucine degradation;ko00900//Terpenoid backbone biosynthesis;ko00650//Butanoate metabolism;ko00072//Synthesis and degradation of ketone bodies	K01641;K01641;K01641;K01641;K01641;K01641	GO:0005737//cytoplasm	GO:0004421//hydroxymethylglutaryl-CoA synthase activity;GO:0042803//protein homodimerization activity	GO:0006695//cholesterol biosynthetic process;GO:0008299//isoprenoid biosynthetic process
MSTRG.10562.1	Sfur000300	0.983887145	1.72E-06	Gmer	Probable GDP-L-fucose synthase	Metabolism;Metabolism;Metabolism	Global and overview maps;Carbohydrate metabolism;Carbohydrate metabolism	ko01100//Metabolic pathways;ko00520//Amino sugar and nucleotide sugar metabolism;ko00051//Fructose and mannose metabolism	K02377;K02377;K02377	-	GO:0047918//GDP-mannose 3,5-epimerase activity;GO:0050577//GDP-L-fucose synthase activity	GO:0033227//dsRNA transport;GO:0042350//GDP-L-fucose biosynthetic process;GO:0042351//'de novo' GDP-L-fucose biosynthetic process
MSTRG.11349.1	Sfur000300	0.980293936	3.47E-06	Gmer	Probable GDP-L-fucose synthase	Metabolism;Metabolism;Metabolism	Global and overview maps;Carbohydrate metabolism;Carbohydrate metabolism	ko01100//Metabolic pathways;ko00520//Amino sugar and nucleotide sugar metabolism;ko00051//Fructose and mannose metabolism	K02377;K02377;K02377	-	GO:0047918//GDP-mannose 3,5-epimerase activity;GO:0050577//GDP-L-fucose synthase activity	GO:0033227//dsRNA transport;GO:0042350//GDP-L-fucose biosynthetic process;GO:0042351//'de novo' GDP-L-fucose biosynthetic process
MSTRG.16086.1	Sfur000300	0.980557497	3.31E-06	Gmer	Probable GDP-L-fucose synthase	Metabolism;Metabolism;Metabolism	Global and overview maps;Carbohydrate metabolism;Carbohydrate metabolism	ko01100//Metabolic pathways;ko00520//Amino sugar and nucleotide sugar metabolism;ko00051//Fructose and mannose metabolism	K02377;K02377;K02377	-	GO:0047918//GDP-mannose 3,5-epimerase activity;GO:0050577//GDP-L-fucose synthase activity	GO:0033227//dsRNA transport;GO:0042350//GDP-L-fucose biosynthetic process;GO:0042351//'de novo' GDP-L-fucose biosynthetic process
MSTRG.16087.1	Sfur000300	0.981217738	2.94E-06	Gmer	Probable GDP-L-fucose synthase	Metabolism;Metabolism;Metabolism	Global and overview maps;Carbohydrate metabolism;Carbohydrate metabolism	ko01100//Metabolic pathways;ko00520//Amino sugar and nucleotide sugar metabolism;ko00051//Fructose and mannose metabolism	K02377;K02377;K02377	-	GO:0047918//GDP-mannose 3,5-epimerase activity;GO:0050577//GDP-L-fucose synthase activity	GO:0033227//dsRNA transport;GO:0042350//GDP-L-fucose biosynthetic process;GO:0042351//'de novo' GDP-L-fucose biosynthetic process
MSTRG.20058.1	Sfur000300	0.980196135	3.53E-06	Gmer	Probable GDP-L-fucose synthase	Metabolism;Metabolism;Metabolism	Global and overview maps;Carbohydrate metabolism;Carbohydrate metabolism	ko01100//Metabolic pathways;ko00520//Amino sugar and nucleotide sugar metabolism;ko00051//Fructose and mannose metabolism	K02377;K02377;K02377	-	GO:0047918//GDP-mannose 3,5-epimerase activity;GO:0050577//GDP-L-fucose synthase activity	GO:0033227//dsRNA transport;GO:0042350//GDP-L-fucose biosynthetic process;GO:0042351//'de novo' GDP-L-fucose biosynthetic process
MSTRG.24164.3	Sfur000300	0.987400428	7.30E-07	Gmer	Probable GDP-L-fucose synthase	Metabolism;Metabolism;Metabolism	Global and overview maps;Carbohydrate metabolism;Carbohydrate metabolism	ko01100//Metabolic pathways;ko00520//Amino sugar and nucleotide sugar metabolism;ko00051//Fructose and mannose metabolism	K02377;K02377;K02377	-	GO:0047918//GDP-mannose 3,5-epimerase activity;GO:0050577//GDP-L-fucose synthase activity	GO:0033227//dsRNA transport;GO:0042350//GDP-L-fucose biosynthetic process;GO:0042351//'de novo' GDP-L-fucose biosynthetic process
MSTRG.24930.1	Sfur000300	0.982153431	2.46E-06	Gmer	Probable GDP-L-fucose synthase	Metabolism;Metabolism;Metabolism	Global and overview maps;Carbohydrate metabolism;Carbohydrate metabolism	ko01100//Metabolic pathways;ko00520//Amino sugar and nucleotide sugar metabolism;ko00051//Fructose and mannose metabolism	K02377;K02377;K02377	-	GO:0047918//GDP-mannose 3,5-epimerase activity;GO:0050577//GDP-L-fucose synthase activity	GO:0033227//dsRNA transport;GO:0042350//GDP-L-fucose biosynthetic process;GO:0042351//'de novo' GDP-L-fucose biosynthetic process
MSTRG.25629.14	Sfur000300	0.988681178	5.02E-07	Gmer	Probable GDP-L-fucose synthase	Metabolism;Metabolism;Metabolism	Global and overview maps;Carbohydrate metabolism;Carbohydrate metabolism	ko01100//Metabolic pathways;ko00520//Amino sugar and nucleotide sugar metabolism;ko00051//Fructose and mannose metabolism	K02377;K02377;K02377	-	GO:0047918//GDP-mannose 3,5-epimerase activity;GO:0050577//GDP-L-fucose synthase activity	GO:0033227//dsRNA transport;GO:0042350//GDP-L-fucose biosynthetic process;GO:0042351//'de novo' GDP-L-fucose biosynthetic process
MSTRG.25635.1	Sfur000300	0.986507231	9.27E-07	Gmer	Probable GDP-L-fucose synthase	Metabolism;Metabolism;Metabolism	Global and overview maps;Carbohydrate metabolism;Carbohydrate metabolism	ko01100//Metabolic pathways;ko00520//Amino sugar and nucleotide sugar metabolism;ko00051//Fructose and mannose metabolism	K02377;K02377;K02377	-	GO:0047918//GDP-mannose 3,5-epimerase activity;GO:0050577//GDP-L-fucose synthase activity	GO:0033227//dsRNA transport;GO:0042350//GDP-L-fucose biosynthetic process;GO:0042351//'de novo' GDP-L-fucose biosynthetic process
MSTRG.31005.1	Sfur000300	0.981446463	2.81E-06	Gmer	Probable GDP-L-fucose synthase	Metabolism;Metabolism;Metabolism	Global and overview maps;Carbohydrate metabolism;Carbohydrate metabolism	ko01100//Metabolic pathways;ko00520//Amino sugar and nucleotide sugar metabolism;ko00051//Fructose and mannose metabolism	K02377;K02377;K02377	-	GO:0047918//GDP-mannose 3,5-epimerase activity;GO:0050577//GDP-L-fucose synthase activity	GO:0033227//dsRNA transport;GO:0042350//GDP-L-fucose biosynthetic process;GO:0042351//'de novo' GDP-L-fucose biosynthetic process
MSTRG.32060.1	Sfur000300	0.981234072	2.93E-06	Gmer	Probable GDP-L-fucose synthase	Metabolism;Metabolism;Metabolism	Global and overview maps;Carbohydrate metabolism;Carbohydrate metabolism	ko01100//Metabolic pathways;ko00520//Amino sugar and nucleotide sugar metabolism;ko00051//Fructose and mannose metabolism	K02377;K02377;K02377	-	GO:0047918//GDP-mannose 3,5-epimerase activity;GO:0050577//GDP-L-fucose synthase activity	GO:0033227//dsRNA transport;GO:0042350//GDP-L-fucose biosynthetic process;GO:0042351//'de novo' GDP-L-fucose biosynthetic process
MSTRG.32766.1	Sfur000300	0.981048683	3.03E-06	Gmer	Probable GDP-L-fucose synthase	Metabolism;Metabolism;Metabolism	Global and overview maps;Carbohydrate metabolism;Carbohydrate metabolism	ko01100//Metabolic pathways;ko00520//Amino sugar and nucleotide sugar metabolism;ko00051//Fructose and mannose metabolism	K02377;K02377;K02377	-	GO:0047918//GDP-mannose 3,5-epimerase activity;GO:0050577//GDP-L-fucose synthase activity	GO:0033227//dsRNA transport;GO:0042350//GDP-L-fucose biosynthetic process;GO:0042351//'de novo' GDP-L-fucose biosynthetic process
MSTRG.34474.2	Sfur000300	0.981599479	2.73E-06	Gmer	Probable GDP-L-fucose synthase	Metabolism;Metabolism;Metabolism	Global and overview maps;Carbohydrate metabolism;Carbohydrate metabolism	ko01100//Metabolic pathways;ko00520//Amino sugar and nucleotide sugar metabolism;ko00051//Fructose and mannose metabolism	K02377;K02377;K02377	-	GO:0047918//GDP-mannose 3,5-epimerase activity;GO:0050577//GDP-L-fucose synthase activity	GO:0033227//dsRNA transport;GO:0042350//GDP-L-fucose biosynthetic process;GO:0042351//'de novo' GDP-L-fucose biosynthetic process
MSTRG.39215.1	Sfur000300	0.981103491	3.00E-06	Gmer	Probable GDP-L-fucose synthase	Metabolism;Metabolism;Metabolism	Global and overview maps;Carbohydrate metabolism;Carbohydrate metabolism	ko01100//Metabolic pathways;ko00520//Amino sugar and nucleotide sugar metabolism;ko00051//Fructose and mannose metabolism	K02377;K02377;K02377	-	GO:0047918//GDP-mannose 3,5-epimerase activity;GO:0050577//GDP-L-fucose synthase activity	GO:0033227//dsRNA transport;GO:0042350//GDP-L-fucose biosynthetic process;GO:0042351//'de novo' GDP-L-fucose biosynthetic process
MSTRG.39779.1	Sfur000300	0.987732498	6.65E-07	Gmer	Probable GDP-L-fucose synthase	Metabolism;Metabolism;Metabolism	Global and overview maps;Carbohydrate metabolism;Carbohydrate metabolism	ko01100//Metabolic pathways;ko00520//Amino sugar and nucleotide sugar metabolism;ko00051//Fructose and mannose metabolism	K02377;K02377;K02377	-	GO:0047918//GDP-mannose 3,5-epimerase activity;GO:0050577//GDP-L-fucose synthase activity	GO:0033227//dsRNA transport;GO:0042350//GDP-L-fucose biosynthetic process;GO:0042351//'de novo' GDP-L-fucose biosynthetic process
MSTRG.8295.1	Sfur000300	0.981710845	2.68E-06	Gmer	Probable GDP-L-fucose synthase	Metabolism;Metabolism;Metabolism	Global and overview maps;Carbohydrate metabolism;Carbohydrate metabolism	ko01100//Metabolic pathways;ko00520//Amino sugar and nucleotide sugar metabolism;ko00051//Fructose and mannose metabolism	K02377;K02377;K02377	-	GO:0047918//GDP-mannose 3,5-epimerase activity;GO:0050577//GDP-L-fucose synthase activity	GO:0033227//dsRNA transport;GO:0042350//GDP-L-fucose biosynthetic process;GO:0042351//'de novo' GDP-L-fucose biosynthetic process
MSTRG.9644.1	Sfur000300	0.980728408	3.21E-06	Gmer	Probable GDP-L-fucose synthase	Metabolism;Metabolism;Metabolism	Global and overview maps;Carbohydrate metabolism;Carbohydrate metabolism	ko01100//Metabolic pathways;ko00520//Amino sugar and nucleotide sugar metabolism;ko00051//Fructose and mannose metabolism	K02377;K02377;K02377	-	GO:0047918//GDP-mannose 3,5-epimerase activity;GO:0050577//GDP-L-fucose synthase activity	GO:0033227//dsRNA transport;GO:0042350//GDP-L-fucose biosynthetic process;GO:0042351//'de novo' GDP-L-fucose biosynthetic process
MSTRG.12497.3	Sfur000301	0.983132363	2.02E-06	AAEL008004	Elongation of very long chain fatty acids protein AAEL008004	Metabolism;Metabolism;Metabolism;Metabolism	Global and overview maps;Global and overview maps;Lipid metabolism;Lipid metabolism	ko01100//Metabolic pathways;ko01212//Fatty acid metabolism;ko01040//Biosynthesis of unsaturated fatty acids;ko00062//Fatty acid elongation	K10250;K10250;K10250;K10250	GO:0030176//integral component of endoplasmic reticulum membrane	-	GO:0006633//fatty acid biosynthetic process
MSTRG.11682.1	Sfur000487	-0.983868543	1.73E-06	Cht10	Probable chitinase 10	Metabolism;Metabolism	Global and overview maps;Carbohydrate metabolism	ko01100//Metabolic pathways;ko00520//Amino sugar and nucleotide sugar metabolism	K01183;K01183	GO:0005576//extracellular region	GO:0004568//chitinase activity;GO:0008061//chitin binding	GO:0000272//polysaccharide catabolic process;GO:0006032//chitin catabolic process
MSTRG.34732.1	Sfur000487	-0.992544566	1.17E-07	Cht10	Probable chitinase 10	Metabolism;Metabolism	Global and overview maps;Carbohydrate metabolism	ko01100//Metabolic pathways;ko00520//Amino sugar and nucleotide sugar metabolism	K01183;K01183	GO:0005576//extracellular region	GO:0004568//chitinase activity;GO:0008061//chitin binding	GO:0000272//polysaccharide catabolic process;GO:0006032//chitin catabolic process
MSTRG.36307.1	Sfur000487	-0.980561843	3.31E-06	Cht10	Probable chitinase 10	Metabolism;Metabolism	Global and overview maps;Carbohydrate metabolism	ko01100//Metabolic pathways;ko00520//Amino sugar and nucleotide sugar metabolism	K01183;K01183	GO:0005576//extracellular region	GO:0004568//chitinase activity;GO:0008061//chitin binding	GO:0000272//polysaccharide catabolic process;GO:0006032//chitin catabolic process
MSTRG.39018.1	Sfur000487	-0.98181266	2.62E-06	Cht10	Probable chitinase 10	Metabolism;Metabolism	Global and overview maps;Carbohydrate metabolism	ko01100//Metabolic pathways;ko00520//Amino sugar and nucleotide sugar metabolism	K01183;K01183	GO:0005576//extracellular region	GO:0004568//chitinase activity;GO:0008061//chitin binding	GO:0000272//polysaccharide catabolic process;GO:0006032//chitin catabolic process
MSTRG.10749.1	Sfur001067	0.986619191	9.01E-07	--	Probable chitinase 10	Metabolism;Metabolism	Global and overview maps;Carbohydrate metabolism	ko01100//Metabolic pathways;ko00520//Amino sugar and nucleotide sugar metabolism	K01183;K01183	GO:0005576//extracellular region	GO:0004568//chitinase activity;GO:0008061//chitin binding	GO:0000272//polysaccharide catabolic process;GO:0006032//chitin catabolic process
MSTRG.11800.2	Sfur001067	0.990888397	2.36E-07	--	Probable chitinase 10	Metabolism;Metabolism	Global and overview maps;Carbohydrate metabolism	ko01100//Metabolic pathways;ko00520//Amino sugar and nucleotide sugar metabolism	K01183;K01183	GO:0005576//extracellular region	GO:0004568//chitinase activity;GO:0008061//chitin binding	GO:0000272//polysaccharide catabolic process;GO:0006032//chitin catabolic process
MSTRG.12179.1	Sfur001067	0.988176708	5.85E-07	--	Probable chitinase 10	Metabolism;Metabolism	Global and overview maps;Carbohydrate metabolism	ko01100//Metabolic pathways;ko00520//Amino sugar and nucleotide sugar metabolism	K01183;K01183	GO:0005576//extracellular region	GO:0004568//chitinase activity;GO:0008061//chitin binding	GO:0000272//polysaccharide catabolic process;GO:0006032//chitin catabolic process
MSTRG.14275.1	Sfur001067	0.980812099	3.16E-06	--	Probable chitinase 10	Metabolism;Metabolism	Global and overview maps;Carbohydrate metabolism	ko01100//Metabolic pathways;ko00520//Amino sugar and nucleotide sugar metabolism	K01183;K01183	GO:0005576//extracellular region	GO:0004568//chitinase activity;GO:0008061//chitin binding	GO:0000272//polysaccharide catabolic process;GO:0006032//chitin catabolic process
MSTRG.1893.1	Sfur001067	0.980931567	3.09E-06	--	Probable chitinase 10	Metabolism;Metabolism	Global and overview maps;Carbohydrate metabolism	ko01100//Metabolic pathways;ko00520//Amino sugar and nucleotide sugar metabolism	K01183;K01183	GO:0005576//extracellular region	GO:0004568//chitinase activity;GO:0008061//chitin binding	GO:0000272//polysaccharide catabolic process;GO:0006032//chitin catabolic process
MSTRG.32068.1	Sfur001067	0.991756343	1.66E-07	--	Probable chitinase 10	Metabolism;Metabolism	Global and overview maps;Carbohydrate metabolism	ko01100//Metabolic pathways;ko00520//Amino sugar and nucleotide sugar metabolism	K01183;K01183	GO:0005576//extracellular region	GO:0004568//chitinase activity;GO:0008061//chitin binding	GO:0000272//polysaccharide catabolic process;GO:0006032//chitin catabolic process
MSTRG.33279.1	Sfur001067	0.994641688	3.69E-08	--	Probable chitinase 10	Metabolism;Metabolism	Global and overview maps;Carbohydrate metabolism	ko01100//Metabolic pathways;ko00520//Amino sugar and nucleotide sugar metabolism	K01183;K01183	GO:0005576//extracellular region	GO:0004568//chitinase activity;GO:0008061//chitin binding	GO:0000272//polysaccharide catabolic process;GO:0006032//chitin catabolic process
MSTRG.33772.1	Sfur001067	0.992518118	1.18E-07	--	Probable chitinase 10	Metabolism;Metabolism	Global and overview maps;Carbohydrate metabolism	ko01100//Metabolic pathways;ko00520//Amino sugar and nucleotide sugar metabolism	K01183;K01183	GO:0005576//extracellular region	GO:0004568//chitinase activity;GO:0008061//chitin binding	GO:0000272//polysaccharide catabolic process;GO:0006032//chitin catabolic process
MSTRG.34229.1	Sfur001067	0.989849959	3.43E-07	--	Probable chitinase 10	Metabolism;Metabolism	Global and overview maps;Carbohydrate metabolism	ko01100//Metabolic pathways;ko00520//Amino sugar and nucleotide sugar metabolism	K01183;K01183	GO:0005576//extracellular region	GO:0004568//chitinase activity;GO:0008061//chitin binding	GO:0000272//polysaccharide catabolic process;GO:0006032//chitin catabolic process
MSTRG.8569.3	Sfur001067	0.982028374	2.52E-06	--	Probable chitinase 10	Metabolism;Metabolism	Global and overview maps;Carbohydrate metabolism	ko01100//Metabolic pathways;ko00520//Amino sugar and nucleotide sugar metabolism	K01183;K01183	GO:0005576//extracellular region	GO:0004568//chitinase activity;GO:0008061//chitin binding	GO:0000272//polysaccharide catabolic process;GO:0006032//chitin catabolic process
MSTRG.27716.1	Sfur001468	0.989739852	3.57E-07	ELOVL4	Elongation of very long chain fatty acids protein 4	Metabolism;Metabolism;Metabolism;Metabolism	Global and overview maps;Global and overview maps;Lipid metabolism;Lipid metabolism	ko01100//Metabolic pathways;ko01212//Fatty acid metabolism;ko01040//Biosynthesis of unsaturated fatty acids;ko00062//Fatty acid elongation	K10249;K10249;K10249;K10249	GO:0005783//endoplasmic reticulum;GO:0030176//integral component of endoplasmic reticulum membrane	GO:0008020//G-protein coupled photoreceptor activity;GO:0009922//fatty acid elongase activity	GO:0006633//fatty acid biosynthetic process;GO:0006636//unsaturated fatty acid biosynthetic process;GO:0019367//fatty acid elongation, saturated fatty acid;GO:0030148//sphingolipid biosynthetic process;GO:0034625//fatty acid elongation, monounsaturated fatty acid;GO:0034626//fatty acid elongation, polyunsaturated fatty acid;GO:0035338//long-chain fatty-acyl-CoA biosynthetic process;GO:0042761//ve…
MSTRG.31094.1	Sfur001468	0.980919144	3.10E-06	ELOVL4	Elongation of very long chain fatty acids protein 4	Metabolism;Metabolism;Metabolism;Metabolism	Global and overview maps;Global and overview maps;Lipid metabolism;Lipid metabolism	ko01100//Metabolic pathways;ko01212//Fatty acid metabolism;ko01040//Biosynthesis of unsaturated fatty acids;ko00062//Fatty acid elongation	K10249;K10249;K10249;K10249	GO:0005783//endoplasmic reticulum;GO:0030176//integral component of endoplasmic reticulum membrane	GO:0008020//G-protein coupled photoreceptor activity;GO:0009922//fatty acid elongase activity	GO:0006633//fatty acid biosynthetic process;GO:0006636//unsaturated fatty acid biosynthetic process;GO:0019367//fatty acid elongation, saturated fatty acid;GO:0030148//sphingolipid biosynthetic process;GO:0034625//fatty acid elongation, monounsaturated fatty acid;GO:0034626//fatty acid elongation, polyunsaturated fatty acid;GO:0035338//long-chain fatty-acyl-CoA biosynthetic process;GO:0042761//ve…
MSTRG.22706.3	Sfur002078	-0.987015419	8.11E-07	jhamt	Juvenile hormone acid O-methyltransferase	Metabolism	Metabolism of terpenoids and polyketides	ko00981//Insect hormone biosynthesis	K10718	-	GO:0019010//farnesoic acid O-methyltransferase activity;GO:0035049//juvenile hormone acid methyltransferase activity	GO:0006718//juvenile hormone biosynthetic process;GO:0032259//methylation
MSTRG.22844.1	Sfur002078	-0.980266424	3.49E-06	jhamt	Juvenile hormone acid O-methyltransferase	Metabolism	Metabolism of terpenoids and polyketides	ko00981//Insect hormone biosynthesis	K10718	-	GO:0019010//farnesoic acid O-methyltransferase activity;GO:0035049//juvenile hormone acid methyltransferase activity	GO:0006718//juvenile hormone biosynthetic process;GO:0032259//methylation
MSTRG.23863.1	Sfur002078	-0.981266965	2.91E-06	jhamt	Juvenile hormone acid O-methyltransferase	Metabolism	Metabolism of terpenoids and polyketides	ko00981//Insect hormone biosynthesis	K10718	-	GO:0019010//farnesoic acid O-methyltransferase activity;GO:0035049//juvenile hormone acid methyltransferase activity	GO:0006718//juvenile hormone biosynthetic process;GO:0032259//methylation
MSTRG.38021.1	Sfur002078	0.987060513	8.01E-07	jhamt	Juvenile hormone acid O-methyltransferase	Metabolism	Metabolism of terpenoids and polyketides	ko00981//Insect hormone biosynthesis	K10718	-	GO:0019010//farnesoic acid O-methyltransferase activity;GO:0035049//juvenile hormone acid methyltransferase activity	GO:0006718//juvenile hormone biosynthetic process;GO:0032259//methylation
MSTRG.29606.1	Sfur002233	0.998886852	1.51E-10	HK1	Hexokinase	Metabolism;Metabolism;Human Diseases;Organismal Systems;Metabolism;Environmental Information Processing;Metabolism;Human Diseases;Metabolism;Metabolism;Human Diseases;Metabolism;Organismal Systems;Metabolism	Global and overview maps;Global and overview maps;Infectious diseases;Endocrine system;Carbohydrate metabolism;Signal transduction;Carbohydrate metabolism;Cancers;Carbohydrate metabolism;Carbohydrate metabolism;Endocrine and metabolic diseases;Carbohydrate metabolism;Digestive system;Biosynthesis of other secondary metabolites	ko01100//Metabolic pathways;ko01200//Carbon metabolism;ko05131//Shigellosis;ko04910//Insulin signaling pathway;ko00520//Amino sugar and nucleotide sugar metabolism;ko04066//HIF-1 signaling pathway;ko00010//Glycolysis / Gluconeogenesis;ko05230//Central carbon metabolism in cancer;ko00500//Starch and sucrose metabolism;ko00052//Galactose metabolism;ko04930//Type II diabetes mellitus;ko00051//Fructo…	K00844;K00844;K00844;K00844;K00844;K00844;K00844;K00844;K00844;K00844;K00844;K00844;K00844;K00844	-	GO:0004396//hexokinase activity;GO:0005524//ATP binding;GO:0005536//glucose binding	GO:0001678//cellular glucose homeostasis;GO:0006096//glycolytic process;GO:0019318//hexose metabolic process
MSTRG.10749.1	Sfur003828	0.987814442	6.50E-07	phm	Cytochrome P450 306a1	Metabolism	Metabolism of terpenoids and polyketides	ko00981//Insect hormone biosynthesis	K10720	GO:0005737//cytoplasm;GO:0005783//endoplasmic reticulum;GO:0005789//endoplasmic reticulum membrane;GO:0043231//intracellular membrane-bounded organelle	GO:0005506//iron ion binding;GO:0008395//steroid hydroxylase activity;GO:0016712//oxidoreductase activity, acting on paired donors, with incorporation or reduction of molecular oxygen, reduced flavin or flavoprotein as one donor, and incorporation of one atom of oxygen;GO:0020037//heme binding;GO:0035302//ecdysteroid 25-hydroxylase activity	GO:0001700//embryonic development via the syncytial blastoderm;GO:0006082//organic acid metabolic process;GO:0006697//ecdysone biosynthetic process;GO:0006805//xenobiotic metabolic process;GO:0007298//border follicle cell migration;GO:0042738//exogenous drug catabolic process;GO:0048477//oogenesis;GO:0055114//oxidation-reduction process
MSTRG.11800.2	Sfur003828	0.995862095	1.49E-08	phm	Cytochrome P450 306a1	Metabolism	Metabolism of terpenoids and polyketides	ko00981//Insect hormone biosynthesis	K10720	GO:0005737//cytoplasm;GO:0005783//endoplasmic reticulum;GO:0005789//endoplasmic reticulum membrane;GO:0043231//intracellular membrane-bounded organelle	GO:0005506//iron ion binding;GO:0008395//steroid hydroxylase activity;GO:0016712//oxidoreductase activity, acting on paired donors, with incorporation or reduction of molecular oxygen, reduced flavin or flavoprotein as one donor, and incorporation of one atom of oxygen;GO:0020037//heme binding;GO:0035302//ecdysteroid 25-hydroxylase activity	GO:0001700//embryonic development via the syncytial blastoderm;GO:0006082//organic acid metabolic process;GO:0006697//ecdysone biosynthetic process;GO:0006805//xenobiotic metabolic process;GO:0007298//border follicle cell migration;GO:0042738//exogenous drug catabolic process;GO:0048477//oogenesis;GO:0055114//oxidation-reduction process
MSTRG.12083.1	Sfur003828	0.983568362	1.84E-06	phm	Cytochrome P450 306a1	Metabolism	Metabolism of terpenoids and polyketides	ko00981//Insect hormone biosynthesis	K10720	GO:0005737//cytoplasm;GO:0005783//endoplasmic reticulum;GO:0005789//endoplasmic reticulum membrane;GO:0043231//intracellular membrane-bounded organelle	GO:0005506//iron ion binding;GO:0008395//steroid hydroxylase activity;GO:0016712//oxidoreductase activity, acting on paired donors, with incorporation or reduction of molecular oxygen, reduced flavin or flavoprotein as one donor, and incorporation of one atom of oxygen;GO:0020037//heme binding;GO:0035302//ecdysteroid 25-hydroxylase activity	GO:0001700//embryonic development via the syncytial blastoderm;GO:0006082//organic acid metabolic process;GO:0006697//ecdysone biosynthetic process;GO:0006805//xenobiotic metabolic process;GO:0007298//border follicle cell migration;GO:0042738//exogenous drug catabolic process;GO:0048477//oogenesis;GO:0055114//oxidation-reduction process
MSTRG.12179.1	Sfur003828	0.988768903	4.89E-07	phm	Cytochrome P450 306a1	Metabolism	Metabolism of terpenoids and polyketides	ko00981//Insect hormone biosynthesis	K10720	GO:0005737//cytoplasm;GO:0005783//endoplasmic reticulum;GO:0005789//endoplasmic reticulum membrane;GO:0043231//intracellular membrane-bounded organelle	GO:0005506//iron ion binding;GO:0008395//steroid hydroxylase activity;GO:0016712//oxidoreductase activity, acting on paired donors, with incorporation or reduction of molecular oxygen, reduced flavin or flavoprotein as one donor, and incorporation of one atom of oxygen;GO:0020037//heme binding;GO:0035302//ecdysteroid 25-hydroxylase activity	GO:0001700//embryonic development via the syncytial blastoderm;GO:0006082//organic acid metabolic process;GO:0006697//ecdysone biosynthetic process;GO:0006805//xenobiotic metabolic process;GO:0007298//border follicle cell migration;GO:0042738//exogenous drug catabolic process;GO:0048477//oogenesis;GO:0055114//oxidation-reduction process
MSTRG.16908.1	Sfur003828	0.986505986	9.28E-07	phm	Cytochrome P450 306a1	Metabolism	Metabolism of terpenoids and polyketides	ko00981//Insect hormone biosynthesis	K10720	GO:0005737//cytoplasm;GO:0005783//endoplasmic reticulum;GO:0005789//endoplasmic reticulum membrane;GO:0043231//intracellular membrane-bounded organelle	GO:0005506//iron ion binding;GO:0008395//steroid hydroxylase activity;GO:0016712//oxidoreductase activity, acting on paired donors, with incorporation or reduction of molecular oxygen, reduced flavin or flavoprotein as one donor, and incorporation of one atom of oxygen;GO:0020037//heme binding;GO:0035302//ecdysteroid 25-hydroxylase activity	GO:0001700//embryonic development via the syncytial blastoderm;GO:0006082//organic acid metabolic process;GO:0006697//ecdysone biosynthetic process;GO:0006805//xenobiotic metabolic process;GO:0007298//border follicle cell migration;GO:0042738//exogenous drug catabolic process;GO:0048477//oogenesis;GO:0055114//oxidation-reduction process
MSTRG.18098.3	Sfur003828	0.985085487	1.31E-06	phm	Cytochrome P450 306a1	Metabolism	Metabolism of terpenoids and polyketides	ko00981//Insect hormone biosynthesis	K10720	GO:0005737//cytoplasm;GO:0005783//endoplasmic reticulum;GO:0005789//endoplasmic reticulum membrane;GO:0043231//intracellular membrane-bounded organelle	GO:0005506//iron ion binding;GO:0008395//steroid hydroxylase activity;GO:0016712//oxidoreductase activity, acting on paired donors, with incorporation or reduction of molecular oxygen, reduced flavin or flavoprotein as one donor, and incorporation of one atom of oxygen;GO:0020037//heme binding;GO:0035302//ecdysteroid 25-hydroxylase activity	GO:0001700//embryonic development via the syncytial blastoderm;GO:0006082//organic acid metabolic process;GO:0006697//ecdysone biosynthetic process;GO:0006805//xenobiotic metabolic process;GO:0007298//border follicle cell migration;GO:0042738//exogenous drug catabolic process;GO:0048477//oogenesis;GO:0055114//oxidation-reduction process
MSTRG.19109.1	Sfur003828	0.986496024	9.30E-07	phm	Cytochrome P450 306a1	Metabolism	Metabolism of terpenoids and polyketides	ko00981//Insect hormone biosynthesis	K10720	GO:0005737//cytoplasm;GO:0005783//endoplasmic reticulum;GO:0005789//endoplasmic reticulum membrane;GO:0043231//intracellular membrane-bounded organelle	GO:0005506//iron ion binding;GO:0008395//steroid hydroxylase activity;GO:0016712//oxidoreductase activity, acting on paired donors, with incorporation or reduction of molecular oxygen, reduced flavin or flavoprotein as one donor, and incorporation of one atom of oxygen;GO:0020037//heme binding;GO:0035302//ecdysteroid 25-hydroxylase activity	GO:0001700//embryonic development via the syncytial blastoderm;GO:0006082//organic acid metabolic process;GO:0006697//ecdysone biosynthetic process;GO:0006805//xenobiotic metabolic process;GO:0007298//border follicle cell migration;GO:0042738//exogenous drug catabolic process;GO:0048477//oogenesis;GO:0055114//oxidation-reduction process
MSTRG.21259.5	Sfur003828	0.988926812	4.65E-07	phm	Cytochrome P450 306a1	Metabolism	Metabolism of terpenoids and polyketides	ko00981//Insect hormone biosynthesis	K10720	GO:0005737//cytoplasm;GO:0005783//endoplasmic reticulum;GO:0005789//endoplasmic reticulum membrane;GO:0043231//intracellular membrane-bounded organelle	GO:0005506//iron ion binding;GO:0008395//steroid hydroxylase activity;GO:0016712//oxidoreductase activity, acting on paired donors, with incorporation or reduction of molecular oxygen, reduced flavin or flavoprotein as one donor, and incorporation of one atom of oxygen;GO:0020037//heme binding;GO:0035302//ecdysteroid 25-hydroxylase activity	GO:0001700//embryonic development via the syncytial blastoderm;GO:0006082//organic acid metabolic process;GO:0006697//ecdysone biosynthetic process;GO:0006805//xenobiotic metabolic process;GO:0007298//border follicle cell migration;GO:0042738//exogenous drug catabolic process;GO:0048477//oogenesis;GO:0055114//oxidation-reduction process
MSTRG.32068.1	Sfur003828	0.997081849	4.41E-09	phm	Cytochrome P450 306a1	Metabolism	Metabolism of terpenoids and polyketides	ko00981//Insect hormone biosynthesis	K10720	GO:0005737//cytoplasm;GO:0005783//endoplasmic reticulum;GO:0005789//endoplasmic reticulum membrane;GO:0043231//intracellular membrane-bounded organelle	GO:0005506//iron ion binding;GO:0008395//steroid hydroxylase activity;GO:0016712//oxidoreductase activity, acting on paired donors, with incorporation or reduction of molecular oxygen, reduced flavin or flavoprotein as one donor, and incorporation of one atom of oxygen;GO:0020037//heme binding;GO:0035302//ecdysteroid 25-hydroxylase activity	GO:0001700//embryonic development via the syncytial blastoderm;GO:0006082//organic acid metabolic process;GO:0006697//ecdysone biosynthetic process;GO:0006805//xenobiotic metabolic process;GO:0007298//border follicle cell migration;GO:0042738//exogenous drug catabolic process;GO:0048477//oogenesis;GO:0055114//oxidation-reduction process
MSTRG.33279.1	Sfur003828	0.993446666	7.45E-08	phm	Cytochrome P450 306a1	Metabolism	Metabolism of terpenoids and polyketides	ko00981//Insect hormone biosynthesis	K10720	GO:0005737//cytoplasm;GO:0005783//endoplasmic reticulum;GO:0005789//endoplasmic reticulum membrane;GO:0043231//intracellular membrane-bounded organelle	GO:0005506//iron ion binding;GO:0008395//steroid hydroxylase activity;GO:0016712//oxidoreductase activity, acting on paired donors, with incorporation or reduction of molecular oxygen, reduced flavin or flavoprotein as one donor, and incorporation of one atom of oxygen;GO:0020037//heme binding;GO:0035302//ecdysteroid 25-hydroxylase activity	GO:0001700//embryonic development via the syncytial blastoderm;GO:0006082//organic acid metabolic process;GO:0006697//ecdysone biosynthetic process;GO:0006805//xenobiotic metabolic process;GO:0007298//border follicle cell migration;GO:0042738//exogenous drug catabolic process;GO:0048477//oogenesis;GO:0055114//oxidation-reduction process
MSTRG.33772.1	Sfur003828	0.995134689	2.63E-08	phm	Cytochrome P450 306a1	Metabolism	Metabolism of terpenoids and polyketides	ko00981//Insect hormone biosynthesis	K10720	GO:0005737//cytoplasm;GO:0005783//endoplasmic reticulum;GO:0005789//endoplasmic reticulum membrane;GO:0043231//intracellular membrane-bounded organelle	GO:0005506//iron ion binding;GO:0008395//steroid hydroxylase activity;GO:0016712//oxidoreductase activity, acting on paired donors, with incorporation or reduction of molecular oxygen, reduced flavin or flavoprotein as one donor, and incorporation of one atom of oxygen;GO:0020037//heme binding;GO:0035302//ecdysteroid 25-hydroxylase activity	GO:0001700//embryonic development via the syncytial blastoderm;GO:0006082//organic acid metabolic process;GO:0006697//ecdysone biosynthetic process;GO:0006805//xenobiotic metabolic process;GO:0007298//border follicle cell migration;GO:0042738//exogenous drug catabolic process;GO:0048477//oogenesis;GO:0055114//oxidation-reduction process
MSTRG.33773.1	Sfur003828	0.989059367	4.46E-07	phm	Cytochrome P450 306a1	Metabolism	Metabolism of terpenoids and polyketides	ko00981//Insect hormone biosynthesis	K10720	GO:0005737//cytoplasm;GO:0005783//endoplasmic reticulum;GO:0005789//endoplasmic reticulum membrane;GO:0043231//intracellular membrane-bounded organelle	GO:0005506//iron ion binding;GO:0008395//steroid hydroxylase activity;GO:0016712//oxidoreductase activity, acting on paired donors, with incorporation or reduction of molecular oxygen, reduced flavin or flavoprotein as one donor, and incorporation of one atom of oxygen;GO:0020037//heme binding;GO:0035302//ecdysteroid 25-hydroxylase activity	GO:0001700//embryonic development via the syncytial blastoderm;GO:0006082//organic acid metabolic process;GO:0006697//ecdysone biosynthetic process;GO:0006805//xenobiotic metabolic process;GO:0007298//border follicle cell migration;GO:0042738//exogenous drug catabolic process;GO:0048477//oogenesis;GO:0055114//oxidation-reduction process
MSTRG.34229.1	Sfur003828	0.998444679	4.88E-10	phm	Cytochrome P450 306a1	Metabolism	Metabolism of terpenoids and polyketides	ko00981//Insect hormone biosynthesis	K10720	GO:0005737//cytoplasm;GO:0005783//endoplasmic reticulum;GO:0005789//endoplasmic reticulum membrane;GO:0043231//intracellular membrane-bounded organelle	GO:0005506//iron ion binding;GO:0008395//steroid hydroxylase activity;GO:0016712//oxidoreductase activity, acting on paired donors, with incorporation or reduction of molecular oxygen, reduced flavin or flavoprotein as one donor, and incorporation of one atom of oxygen;GO:0020037//heme binding;GO:0035302//ecdysteroid 25-hydroxylase activity	GO:0001700//embryonic development via the syncytial blastoderm;GO:0006082//organic acid metabolic process;GO:0006697//ecdysone biosynthetic process;GO:0006805//xenobiotic metabolic process;GO:0007298//border follicle cell migration;GO:0042738//exogenous drug catabolic process;GO:0048477//oogenesis;GO:0055114//oxidation-reduction process
MSTRG.36087.1	Sfur003828	0.987119554	7.89E-07	phm	Cytochrome P450 306a1	Metabolism	Metabolism of terpenoids and polyketides	ko00981//Insect hormone biosynthesis	K10720	GO:0005737//cytoplasm;GO:0005783//endoplasmic reticulum;GO:0005789//endoplasmic reticulum membrane;GO:0043231//intracellular membrane-bounded organelle	GO:0005506//iron ion binding;GO:0008395//steroid hydroxylase activity;GO:0016712//oxidoreductase activity, acting on paired donors, with incorporation or reduction of molecular oxygen, reduced flavin or flavoprotein as one donor, and incorporation of one atom of oxygen;GO:0020037//heme binding;GO:0035302//ecdysteroid 25-hydroxylase activity	GO:0001700//embryonic development via the syncytial blastoderm;GO:0006082//organic acid metabolic process;GO:0006697//ecdysone biosynthetic process;GO:0006805//xenobiotic metabolic process;GO:0007298//border follicle cell migration;GO:0042738//exogenous drug catabolic process;GO:0048477//oogenesis;GO:0055114//oxidation-reduction process
MSTRG.3731.1	Sfur003828	0.982893386	2.12E-06	phm	Cytochrome P450 306a1	Metabolism	Metabolism of terpenoids and polyketides	ko00981//Insect hormone biosynthesis	K10720	GO:0005737//cytoplasm;GO:0005783//endoplasmic reticulum;GO:0005789//endoplasmic reticulum membrane;GO:0043231//intracellular membrane-bounded organelle	GO:0005506//iron ion binding;GO:0008395//steroid hydroxylase activity;GO:0016712//oxidoreductase activity, acting on paired donors, with incorporation or reduction of molecular oxygen, reduced flavin or flavoprotein as one donor, and incorporation of one atom of oxygen;GO:0020037//heme binding;GO:0035302//ecdysteroid 25-hydroxylase activity	GO:0001700//embryonic development via the syncytial blastoderm;GO:0006082//organic acid metabolic process;GO:0006697//ecdysone biosynthetic process;GO:0006805//xenobiotic metabolic process;GO:0007298//border follicle cell migration;GO:0042738//exogenous drug catabolic process;GO:0048477//oogenesis;GO:0055114//oxidation-reduction process
MSTRG.4917.1	Sfur003828	0.984077387	1.65E-06	phm	Cytochrome P450 306a1	Metabolism	Metabolism of terpenoids and polyketides	ko00981//Insect hormone biosynthesis	K10720	GO:0005737//cytoplasm;GO:0005783//endoplasmic reticulum;GO:0005789//endoplasmic reticulum membrane;GO:0043231//intracellular membrane-bounded organelle	GO:0005506//iron ion binding;GO:0008395//steroid hydroxylase activity;GO:0016712//oxidoreductase activity, acting on paired donors, with incorporation or reduction of molecular oxygen, reduced flavin or flavoprotein as one donor, and incorporation of one atom of oxygen;GO:0020037//heme binding;GO:0035302//ecdysteroid 25-hydroxylase activity	GO:0001700//embryonic development via the syncytial blastoderm;GO:0006082//organic acid metabolic process;GO:0006697//ecdysone biosynthetic process;GO:0006805//xenobiotic metabolic process;GO:0007298//border follicle cell migration;GO:0042738//exogenous drug catabolic process;GO:0048477//oogenesis;GO:0055114//oxidation-reduction process
MSTRG.5073.2	Sfur003828	0.985056327	1.32E-06	phm	Cytochrome P450 306a1	Metabolism	Metabolism of terpenoids and polyketides	ko00981//Insect hormone biosynthesis	K10720	GO:0005737//cytoplasm;GO:0005783//endoplasmic reticulum;GO:0005789//endoplasmic reticulum membrane;GO:0043231//intracellular membrane-bounded organelle	GO:0005506//iron ion binding;GO:0008395//steroid hydroxylase activity;GO:0016712//oxidoreductase activity, acting on paired donors, with incorporation or reduction of molecular oxygen, reduced flavin or flavoprotein as one donor, and incorporation of one atom of oxygen;GO:0020037//heme binding;GO:0035302//ecdysteroid 25-hydroxylase activity	GO:0001700//embryonic development via the syncytial blastoderm;GO:0006082//organic acid metabolic process;GO:0006697//ecdysone biosynthetic process;GO:0006805//xenobiotic metabolic process;GO:0007298//border follicle cell migration;GO:0042738//exogenous drug catabolic process;GO:0048477//oogenesis;GO:0055114//oxidation-reduction process
MSTRG.8569.3	Sfur003828	0.991354278	1.96E-07	phm	Cytochrome P450 306a1	Metabolism	Metabolism of terpenoids and polyketides	ko00981//Insect hormone biosynthesis	K10720	GO:0005737//cytoplasm;GO:0005783//endoplasmic reticulum;GO:0005789//endoplasmic reticulum membrane;GO:0043231//intracellular membrane-bounded organelle	GO:0005506//iron ion binding;GO:0008395//steroid hydroxylase activity;GO:0016712//oxidoreductase activity, acting on paired donors, with incorporation or reduction of molecular oxygen, reduced flavin or flavoprotein as one donor, and incorporation of one atom of oxygen;GO:0020037//heme binding;GO:0035302//ecdysteroid 25-hydroxylase activity	GO:0001700//embryonic development via the syncytial blastoderm;GO:0006082//organic acid metabolic process;GO:0006697//ecdysone biosynthetic process;GO:0006805//xenobiotic metabolic process;GO:0007298//border follicle cell migration;GO:0042738//exogenous drug catabolic process;GO:0048477//oogenesis;GO:0055114//oxidation-reduction process
MSTRG.12968.2	Sfur004410	0.980895852	3.11E-06	FDPS	Farnesyl pyrophosphate synthase	Metabolism;Human Diseases;Human Diseases;Metabolism	Global and overview maps;Infectious diseases;Infectious diseases;Metabolism of terpenoids and polyketides	ko01100//Metabolic pathways;ko05166//HTLV-I infection;ko05164//Influenza A;ko00900//Terpenoid backbone biosynthesis	K00787;K00787;K00787;K00787	GO:0005737//cytoplasm	GO:0004161//dimethylallyltranstransferase activity;GO:0004337//geranyltranstransferase activity;GO:0046872//metal ion binding	GO:0006695//cholesterol biosynthetic process;GO:0033384//geranyl diphosphate biosynthetic process;GO:0045337//farnesyl diphosphate biosynthetic process
MSTRG.18635.5	Sfur004410	0.988170666	5.86E-07	FDPS	Farnesyl pyrophosphate synthase	Metabolism;Human Diseases;Human Diseases;Metabolism	Global and overview maps;Infectious diseases;Infectious diseases;Metabolism of terpenoids and polyketides	ko01100//Metabolic pathways;ko05166//HTLV-I infection;ko05164//Influenza A;ko00900//Terpenoid backbone biosynthesis	K00787;K00787;K00787;K00787	GO:0005737//cytoplasm	GO:0004161//dimethylallyltranstransferase activity;GO:0004337//geranyltranstransferase activity;GO:0046872//metal ion binding	GO:0006695//cholesterol biosynthetic process;GO:0033384//geranyl diphosphate biosynthetic process;GO:0045337//farnesyl diphosphate biosynthetic process
MSTRG.20058.1	Sfur004410	0.983679422	1.80E-06	FDPS	Farnesyl pyrophosphate synthase	Metabolism;Human Diseases;Human Diseases;Metabolism	Global and overview maps;Infectious diseases;Infectious diseases;Metabolism of terpenoids and polyketides	ko01100//Metabolic pathways;ko05166//HTLV-I infection;ko05164//Influenza A;ko00900//Terpenoid backbone biosynthesis	K00787;K00787;K00787;K00787	GO:0005737//cytoplasm	GO:0004161//dimethylallyltranstransferase activity;GO:0004337//geranyltranstransferase activity;GO:0046872//metal ion binding	GO:0006695//cholesterol biosynthetic process;GO:0033384//geranyl diphosphate biosynthetic process;GO:0045337//farnesyl diphosphate biosynthetic process
MSTRG.20196.1	Sfur004410	0.984177826	1.62E-06	FDPS	Farnesyl pyrophosphate synthase	Metabolism;Human Diseases;Human Diseases;Metabolism	Global and overview maps;Infectious diseases;Infectious diseases;Metabolism of terpenoids and polyketides	ko01100//Metabolic pathways;ko05166//HTLV-I infection;ko05164//Influenza A;ko00900//Terpenoid backbone biosynthesis	K00787;K00787;K00787;K00787	GO:0005737//cytoplasm	GO:0004161//dimethylallyltranstransferase activity;GO:0004337//geranyltranstransferase activity;GO:0046872//metal ion binding	GO:0006695//cholesterol biosynthetic process;GO:0033384//geranyl diphosphate biosynthetic process;GO:0045337//farnesyl diphosphate biosynthetic process
MSTRG.21441.2	Sfur004410	0.99110173	2.17E-07	FDPS	Farnesyl pyrophosphate synthase	Metabolism;Human Diseases;Human Diseases;Metabolism	Global and overview maps;Infectious diseases;Infectious diseases;Metabolism of terpenoids and polyketides	ko01100//Metabolic pathways;ko05166//HTLV-I infection;ko05164//Influenza A;ko00900//Terpenoid backbone biosynthesis	K00787;K00787;K00787;K00787	GO:0005737//cytoplasm	GO:0004161//dimethylallyltranstransferase activity;GO:0004337//geranyltranstransferase activity;GO:0046872//metal ion binding	GO:0006695//cholesterol biosynthetic process;GO:0033384//geranyl diphosphate biosynthetic process;GO:0045337//farnesyl diphosphate biosynthetic process
MSTRG.21876.1	Sfur004410	0.980203792	3.53E-06	FDPS	Farnesyl pyrophosphate synthase	Metabolism;Human Diseases;Human Diseases;Metabolism	Global and overview maps;Infectious diseases;Infectious diseases;Metabolism of terpenoids and polyketides	ko01100//Metabolic pathways;ko05166//HTLV-I infection;ko05164//Influenza A;ko00900//Terpenoid backbone biosynthesis	K00787;K00787;K00787;K00787	GO:0005737//cytoplasm	GO:0004161//dimethylallyltranstransferase activity;GO:0004337//geranyltranstransferase activity;GO:0046872//metal ion binding	GO:0006695//cholesterol biosynthetic process;GO:0033384//geranyl diphosphate biosynthetic process;GO:0045337//farnesyl diphosphate biosynthetic process
MSTRG.2257.2	Sfur004410	0.983866205	1.73E-06	FDPS	Farnesyl pyrophosphate synthase	Metabolism;Human Diseases;Human Diseases;Metabolism	Global and overview maps;Infectious diseases;Infectious diseases;Metabolism of terpenoids and polyketides	ko01100//Metabolic pathways;ko05166//HTLV-I infection;ko05164//Influenza A;ko00900//Terpenoid backbone biosynthesis	K00787;K00787;K00787;K00787	GO:0005737//cytoplasm	GO:0004161//dimethylallyltranstransferase activity;GO:0004337//geranyltranstransferase activity;GO:0046872//metal ion binding	GO:0006695//cholesterol biosynthetic process;GO:0033384//geranyl diphosphate biosynthetic process;GO:0045337//farnesyl diphosphate biosynthetic process
MSTRG.22908.1	Sfur004410	0.991453595	1.88E-07	FDPS	Farnesyl pyrophosphate synthase	Metabolism;Human Diseases;Human Diseases;Metabolism	Global and overview maps;Infectious diseases;Infectious diseases;Metabolism of terpenoids and polyketides	ko01100//Metabolic pathways;ko05166//HTLV-I infection;ko05164//Influenza A;ko00900//Terpenoid backbone biosynthesis	K00787;K00787;K00787;K00787	GO:0005737//cytoplasm	GO:0004161//dimethylallyltranstransferase activity;GO:0004337//geranyltranstransferase activity;GO:0046872//metal ion binding	GO:0006695//cholesterol biosynthetic process;GO:0033384//geranyl diphosphate biosynthetic process;GO:0045337//farnesyl diphosphate biosynthetic process
MSTRG.24047.1	Sfur004410	0.981180698	2.96E-06	FDPS	Farnesyl pyrophosphate synthase	Metabolism;Human Diseases;Human Diseases;Metabolism	Global and overview maps;Infectious diseases;Infectious diseases;Metabolism of terpenoids and polyketides	ko01100//Metabolic pathways;ko05166//HTLV-I infection;ko05164//Influenza A;ko00900//Terpenoid backbone biosynthesis	K00787;K00787;K00787;K00787	GO:0005737//cytoplasm	GO:0004161//dimethylallyltranstransferase activity;GO:0004337//geranyltranstransferase activity;GO:0046872//metal ion binding	GO:0006695//cholesterol biosynthetic process;GO:0033384//geranyl diphosphate biosynthetic process;GO:0045337//farnesyl diphosphate biosynthetic process
MSTRG.2446.2	Sfur004410	0.983607602	1.83E-06	FDPS	Farnesyl pyrophosphate synthase	Metabolism;Human Diseases;Human Diseases;Metabolism	Global and overview maps;Infectious diseases;Infectious diseases;Metabolism of terpenoids and polyketides	ko01100//Metabolic pathways;ko05166//HTLV-I infection;ko05164//Influenza A;ko00900//Terpenoid backbone biosynthesis	K00787;K00787;K00787;K00787	GO:0005737//cytoplasm	GO:0004161//dimethylallyltranstransferase activity;GO:0004337//geranyltranstransferase activity;GO:0046872//metal ion binding	GO:0006695//cholesterol biosynthetic process;GO:0033384//geranyl diphosphate biosynthetic process;GO:0045337//farnesyl diphosphate biosynthetic process
MSTRG.25634.1	Sfur004410	0.991014431	2.24E-07	FDPS	Farnesyl pyrophosphate synthase	Metabolism;Human Diseases;Human Diseases;Metabolism	Global and overview maps;Infectious diseases;Infectious diseases;Metabolism of terpenoids and polyketides	ko01100//Metabolic pathways;ko05166//HTLV-I infection;ko05164//Influenza A;ko00900//Terpenoid backbone biosynthesis	K00787;K00787;K00787;K00787	GO:0005737//cytoplasm	GO:0004161//dimethylallyltranstransferase activity;GO:0004337//geranyltranstransferase activity;GO:0046872//metal ion binding	GO:0006695//cholesterol biosynthetic process;GO:0033384//geranyl diphosphate biosynthetic process;GO:0045337//farnesyl diphosphate biosynthetic process
MSTRG.27226.1	Sfur004410	0.988348324	5.56E-07	FDPS	Farnesyl pyrophosphate synthase	Metabolism;Human Diseases;Human Diseases;Metabolism	Global and overview maps;Infectious diseases;Infectious diseases;Metabolism of terpenoids and polyketides	ko01100//Metabolic pathways;ko05166//HTLV-I infection;ko05164//Influenza A;ko00900//Terpenoid backbone biosynthesis	K00787;K00787;K00787;K00787	GO:0005737//cytoplasm	GO:0004161//dimethylallyltranstransferase activity;GO:0004337//geranyltranstransferase activity;GO:0046872//metal ion binding	GO:0006695//cholesterol biosynthetic process;GO:0033384//geranyl diphosphate biosynthetic process;GO:0045337//farnesyl diphosphate biosynthetic process
MSTRG.28253.4	Sfur004410	0.990558345	2.67E-07	FDPS	Farnesyl pyrophosphate synthase	Metabolism;Human Diseases;Human Diseases;Metabolism	Global and overview maps;Infectious diseases;Infectious diseases;Metabolism of terpenoids and polyketides	ko01100//Metabolic pathways;ko05166//HTLV-I infection;ko05164//Influenza A;ko00900//Terpenoid backbone biosynthesis	K00787;K00787;K00787;K00787	GO:0005737//cytoplasm	GO:0004161//dimethylallyltranstransferase activity;GO:0004337//geranyltranstransferase activity;GO:0046872//metal ion binding	GO:0006695//cholesterol biosynthetic process;GO:0033384//geranyl diphosphate biosynthetic process;GO:0045337//farnesyl diphosphate biosynthetic process
MSTRG.28591.1	Sfur004410	0.980698518	3.23E-06	FDPS	Farnesyl pyrophosphate synthase	Metabolism;Human Diseases;Human Diseases;Metabolism	Global and overview maps;Infectious diseases;Infectious diseases;Metabolism of terpenoids and polyketides	ko01100//Metabolic pathways;ko05166//HTLV-I infection;ko05164//Influenza A;ko00900//Terpenoid backbone biosynthesis	K00787;K00787;K00787;K00787	GO:0005737//cytoplasm	GO:0004161//dimethylallyltranstransferase activity;GO:0004337//geranyltranstransferase activity;GO:0046872//metal ion binding	GO:0006695//cholesterol biosynthetic process;GO:0033384//geranyl diphosphate biosynthetic process;GO:0045337//farnesyl diphosphate biosynthetic process
MSTRG.30274.1	Sfur004410	0.991930828	1.54E-07	FDPS	Farnesyl pyrophosphate synthase	Metabolism;Human Diseases;Human Diseases;Metabolism	Global and overview maps;Infectious diseases;Infectious diseases;Metabolism of terpenoids and polyketides	ko01100//Metabolic pathways;ko05166//HTLV-I infection;ko05164//Influenza A;ko00900//Terpenoid backbone biosynthesis	K00787;K00787;K00787;K00787	GO:0005737//cytoplasm	GO:0004161//dimethylallyltranstransferase activity;GO:0004337//geranyltranstransferase activity;GO:0046872//metal ion binding	GO:0006695//cholesterol biosynthetic process;GO:0033384//geranyl diphosphate biosynthetic process;GO:0045337//farnesyl diphosphate biosynthetic process
MSTRG.32053.1	Sfur004410	0.985203135	1.28E-06	FDPS	Farnesyl pyrophosphate synthase	Metabolism;Human Diseases;Human Diseases;Metabolism	Global and overview maps;Infectious diseases;Infectious diseases;Metabolism of terpenoids and polyketides	ko01100//Metabolic pathways;ko05166//HTLV-I infection;ko05164//Influenza A;ko00900//Terpenoid backbone biosynthesis	K00787;K00787;K00787;K00787	GO:0005737//cytoplasm	GO:0004161//dimethylallyltranstransferase activity;GO:0004337//geranyltranstransferase activity;GO:0046872//metal ion binding	GO:0006695//cholesterol biosynthetic process;GO:0033384//geranyl diphosphate biosynthetic process;GO:0045337//farnesyl diphosphate biosynthetic process
MSTRG.32768.1	Sfur004410	0.989096837	4.41E-07	FDPS	Farnesyl pyrophosphate synthase	Metabolism;Human Diseases;Human Diseases;Metabolism	Global and overview maps;Infectious diseases;Infectious diseases;Metabolism of terpenoids and polyketides	ko01100//Metabolic pathways;ko05166//HTLV-I infection;ko05164//Influenza A;ko00900//Terpenoid backbone biosynthesis	K00787;K00787;K00787;K00787	GO:0005737//cytoplasm	GO:0004161//dimethylallyltranstransferase activity;GO:0004337//geranyltranstransferase activity;GO:0046872//metal ion binding	GO:0006695//cholesterol biosynthetic process;GO:0033384//geranyl diphosphate biosynthetic process;GO:0045337//farnesyl diphosphate biosynthetic process
MSTRG.34473.3	Sfur004410	0.981991942	2.54E-06	FDPS	Farnesyl pyrophosphate synthase	Metabolism;Human Diseases;Human Diseases;Metabolism	Global and overview maps;Infectious diseases;Infectious diseases;Metabolism of terpenoids and polyketides	ko01100//Metabolic pathways;ko05166//HTLV-I infection;ko05164//Influenza A;ko00900//Terpenoid backbone biosynthesis	K00787;K00787;K00787;K00787	GO:0005737//cytoplasm	GO:0004161//dimethylallyltranstransferase activity;GO:0004337//geranyltranstransferase activity;GO:0046872//metal ion binding	GO:0006695//cholesterol biosynthetic process;GO:0033384//geranyl diphosphate biosynthetic process;GO:0045337//farnesyl diphosphate biosynthetic process
MSTRG.34474.2	Sfur004410	0.984078424	1.65E-06	FDPS	Farnesyl pyrophosphate synthase	Metabolism;Human Diseases;Human Diseases;Metabolism	Global and overview maps;Infectious diseases;Infectious diseases;Metabolism of terpenoids and polyketides	ko01100//Metabolic pathways;ko05166//HTLV-I infection;ko05164//Influenza A;ko00900//Terpenoid backbone biosynthesis	K00787;K00787;K00787;K00787	GO:0005737//cytoplasm	GO:0004161//dimethylallyltranstransferase activity;GO:0004337//geranyltranstransferase activity;GO:0046872//metal ion binding	GO:0006695//cholesterol biosynthetic process;GO:0033384//geranyl diphosphate biosynthetic process;GO:0045337//farnesyl diphosphate biosynthetic process
MSTRG.34874.1	Sfur004410	0.983549623	1.85E-06	FDPS	Farnesyl pyrophosphate synthase	Metabolism;Human Diseases;Human Diseases;Metabolism	Global and overview maps;Infectious diseases;Infectious diseases;Metabolism of terpenoids and polyketides	ko01100//Metabolic pathways;ko05166//HTLV-I infection;ko05164//Influenza A;ko00900//Terpenoid backbone biosynthesis	K00787;K00787;K00787;K00787	GO:0005737//cytoplasm	GO:0004161//dimethylallyltranstransferase activity;GO:0004337//geranyltranstransferase activity;GO:0046872//metal ion binding	GO:0006695//cholesterol biosynthetic process;GO:0033384//geranyl diphosphate biosynthetic process;GO:0045337//farnesyl diphosphate biosynthetic process
MSTRG.36079.1	Sfur004410	0.99069489	2.54E-07	FDPS	Farnesyl pyrophosphate synthase	Metabolism;Human Diseases;Human Diseases;Metabolism	Global and overview maps;Infectious diseases;Infectious diseases;Metabolism of terpenoids and polyketides	ko01100//Metabolic pathways;ko05166//HTLV-I infection;ko05164//Influenza A;ko00900//Terpenoid backbone biosynthesis	K00787;K00787;K00787;K00787	GO:0005737//cytoplasm	GO:0004161//dimethylallyltranstransferase activity;GO:0004337//geranyltranstransferase activity;GO:0046872//metal ion binding	GO:0006695//cholesterol biosynthetic process;GO:0033384//geranyl diphosphate biosynthetic process;GO:0045337//farnesyl diphosphate biosynthetic process
MSTRG.3765.1	Sfur004410	0.989861503	3.42E-07	FDPS	Farnesyl pyrophosphate synthase	Metabolism;Human Diseases;Human Diseases;Metabolism	Global and overview maps;Infectious diseases;Infectious diseases;Metabolism of terpenoids and polyketides	ko01100//Metabolic pathways;ko05166//HTLV-I infection;ko05164//Influenza A;ko00900//Terpenoid backbone biosynthesis	K00787;K00787;K00787;K00787	GO:0005737//cytoplasm	GO:0004161//dimethylallyltranstransferase activity;GO:0004337//geranyltranstransferase activity;GO:0046872//metal ion binding	GO:0006695//cholesterol biosynthetic process;GO:0033384//geranyl diphosphate biosynthetic process;GO:0045337//farnesyl diphosphate biosynthetic process
MSTRG.38275.2	Sfur004410	0.981894151	2.58E-06	FDPS	Farnesyl pyrophosphate synthase	Metabolism;Human Diseases;Human Diseases;Metabolism	Global and overview maps;Infectious diseases;Infectious diseases;Metabolism of terpenoids and polyketides	ko01100//Metabolic pathways;ko05166//HTLV-I infection;ko05164//Influenza A;ko00900//Terpenoid backbone biosynthesis	K00787;K00787;K00787;K00787	GO:0005737//cytoplasm	GO:0004161//dimethylallyltranstransferase activity;GO:0004337//geranyltranstransferase activity;GO:0046872//metal ion binding	GO:0006695//cholesterol biosynthetic process;GO:0033384//geranyl diphosphate biosynthetic process;GO:0045337//farnesyl diphosphate biosynthetic process
MSTRG.38291.5	Sfur004410	0.995880634	1.47E-08	FDPS	Farnesyl pyrophosphate synthase	Metabolism;Human Diseases;Human Diseases;Metabolism	Global and overview maps;Infectious diseases;Infectious diseases;Metabolism of terpenoids and polyketides	ko01100//Metabolic pathways;ko05166//HTLV-I infection;ko05164//Influenza A;ko00900//Terpenoid backbone biosynthesis	K00787;K00787;K00787;K00787	GO:0005737//cytoplasm	GO:0004161//dimethylallyltranstransferase activity;GO:0004337//geranyltranstransferase activity;GO:0046872//metal ion binding	GO:0006695//cholesterol biosynthetic process;GO:0033384//geranyl diphosphate biosynthetic process;GO:0045337//farnesyl diphosphate biosynthetic process
MSTRG.39026.1	Sfur004410	0.986194694	1.00E-06	FDPS	Farnesyl pyrophosphate synthase	Metabolism;Human Diseases;Human Diseases;Metabolism	Global and overview maps;Infectious diseases;Infectious diseases;Metabolism of terpenoids and polyketides	ko01100//Metabolic pathways;ko05166//HTLV-I infection;ko05164//Influenza A;ko00900//Terpenoid backbone biosynthesis	K00787;K00787;K00787;K00787	GO:0005737//cytoplasm	GO:0004161//dimethylallyltranstransferase activity;GO:0004337//geranyltranstransferase activity;GO:0046872//metal ion binding	GO:0006695//cholesterol biosynthetic process;GO:0033384//geranyl diphosphate biosynthetic process;GO:0045337//farnesyl diphosphate biosynthetic process
MSTRG.4310.1	Sfur004410	0.985606212	1.16E-06	FDPS	Farnesyl pyrophosphate synthase	Metabolism;Human Diseases;Human Diseases;Metabolism	Global and overview maps;Infectious diseases;Infectious diseases;Metabolism of terpenoids and polyketides	ko01100//Metabolic pathways;ko05166//HTLV-I infection;ko05164//Influenza A;ko00900//Terpenoid backbone biosynthesis	K00787;K00787;K00787;K00787	GO:0005737//cytoplasm	GO:0004161//dimethylallyltranstransferase activity;GO:0004337//geranyltranstransferase activity;GO:0046872//metal ion binding	GO:0006695//cholesterol biosynthetic process;GO:0033384//geranyl diphosphate biosynthetic process;GO:0045337//farnesyl diphosphate biosynthetic process
MSTRG.6175.1	Sfur004410	0.993289828	8.10E-08	FDPS	Farnesyl pyrophosphate synthase	Metabolism;Human Diseases;Human Diseases;Metabolism	Global and overview maps;Infectious diseases;Infectious diseases;Metabolism of terpenoids and polyketides	ko01100//Metabolic pathways;ko05166//HTLV-I infection;ko05164//Influenza A;ko00900//Terpenoid backbone biosynthesis	K00787;K00787;K00787;K00787	GO:0005737//cytoplasm	GO:0004161//dimethylallyltranstransferase activity;GO:0004337//geranyltranstransferase activity;GO:0046872//metal ion binding	GO:0006695//cholesterol biosynthetic process;GO:0033384//geranyl diphosphate biosynthetic process;GO:0045337//farnesyl diphosphate biosynthetic process
MSTRG.8569.4	Sfur004410	0.985759505	1.12E-06	FDPS	Farnesyl pyrophosphate synthase	Metabolism;Human Diseases;Human Diseases;Metabolism	Global and overview maps;Infectious diseases;Infectious diseases;Metabolism of terpenoids and polyketides	ko01100//Metabolic pathways;ko05166//HTLV-I infection;ko05164//Influenza A;ko00900//Terpenoid backbone biosynthesis	K00787;K00787;K00787;K00787	GO:0005737//cytoplasm	GO:0004161//dimethylallyltranstransferase activity;GO:0004337//geranyltranstransferase activity;GO:0046872//metal ion binding	GO:0006695//cholesterol biosynthetic process;GO:0033384//geranyl diphosphate biosynthetic process;GO:0045337//farnesyl diphosphate biosynthetic process
MSTRG.19379.1	Sfur004784	-0.989004303	4.54E-07	Gfpt2	Glutamine--fructose-6-phosphate aminotransferase [isomerizing] 2	Metabolism;Metabolism;Human Diseases;Metabolism	Global and overview maps;Carbohydrate metabolism;Endocrine and metabolic diseases;Amino acid metabolism	ko01100//Metabolic pathways;ko00520//Amino sugar and nucleotide sugar metabolism;ko04931//Insulin resistance;ko00250//Alanine, aspartate and glutamate metabolism	K00820;K00820;K00820;K00820	-	GO:0004360//glutamine-fructose-6-phosphate transaminase (isomerizing) activity;GO:0097367//carbohydrate derivative binding	GO:0006002//fructose 6-phosphate metabolic process;GO:0006047//UDP-N-acetylglucosamine metabolic process;GO:0006048//UDP-N-acetylglucosamine biosynthetic process;GO:0006487//protein N-linked glycosylation;GO:0006541//glutamine metabolic process;GO:1990830//cellular response to leukemia inhibitory factor
MSTRG.32265.2	Sfur004784	0.985097081	1.31E-06	Gfpt2	Glutamine--fructose-6-phosphate aminotransferase [isomerizing] 2	Metabolism;Metabolism;Human Diseases;Metabolism	Global and overview maps;Carbohydrate metabolism;Endocrine and metabolic diseases;Amino acid metabolism	ko01100//Metabolic pathways;ko00520//Amino sugar and nucleotide sugar metabolism;ko04931//Insulin resistance;ko00250//Alanine, aspartate and glutamate metabolism	K00820;K00820;K00820;K00820	-	GO:0004360//glutamine-fructose-6-phosphate transaminase (isomerizing) activity;GO:0097367//carbohydrate derivative binding	GO:0006002//fructose 6-phosphate metabolic process;GO:0006047//UDP-N-acetylglucosamine metabolic process;GO:0006048//UDP-N-acetylglucosamine biosynthetic process;GO:0006487//protein N-linked glycosylation;GO:0006541//glutamine metabolic process;GO:1990830//cellular response to leukemia inhibitory factor
MSTRG.36147.1	Sfur004784	0.989907119	3.37E-07	Gfpt2	Glutamine--fructose-6-phosphate aminotransferase [isomerizing] 2	Metabolism;Metabolism;Human Diseases;Metabolism	Global and overview maps;Carbohydrate metabolism;Endocrine and metabolic diseases;Amino acid metabolism	ko01100//Metabolic pathways;ko00520//Amino sugar and nucleotide sugar metabolism;ko04931//Insulin resistance;ko00250//Alanine, aspartate and glutamate metabolism	K00820;K00820;K00820;K00820	-	GO:0004360//glutamine-fructose-6-phosphate transaminase (isomerizing) activity;GO:0097367//carbohydrate derivative binding	GO:0006002//fructose 6-phosphate metabolic process;GO:0006047//UDP-N-acetylglucosamine metabolic process;GO:0006048//UDP-N-acetylglucosamine biosynthetic process;GO:0006487//protein N-linked glycosylation;GO:0006541//glutamine metabolic process;GO:1990830//cellular response to leukemia inhibitory factor
MSTRG.36165.1	Sfur004784	0.983169008	2.00E-06	Gfpt2	Glutamine--fructose-6-phosphate aminotransferase [isomerizing] 2	Metabolism;Metabolism;Human Diseases;Metabolism	Global and overview maps;Carbohydrate metabolism;Endocrine and metabolic diseases;Amino acid metabolism	ko01100//Metabolic pathways;ko00520//Amino sugar and nucleotide sugar metabolism;ko04931//Insulin resistance;ko00250//Alanine, aspartate and glutamate metabolism	K00820;K00820;K00820;K00820	-	GO:0004360//glutamine-fructose-6-phosphate transaminase (isomerizing) activity;GO:0097367//carbohydrate derivative binding	GO:0006002//fructose 6-phosphate metabolic process;GO:0006047//UDP-N-acetylglucosamine metabolic process;GO:0006048//UDP-N-acetylglucosamine biosynthetic process;GO:0006487//protein N-linked glycosylation;GO:0006541//glutamine metabolic process;GO:1990830//cellular response to leukemia inhibitory factor
MSTRG.36368.1	Sfur004784	0.984723525	1.43E-06	Gfpt2	Glutamine--fructose-6-phosphate aminotransferase [isomerizing] 2	Metabolism;Metabolism;Human Diseases;Metabolism	Global and overview maps;Carbohydrate metabolism;Endocrine and metabolic diseases;Amino acid metabolism	ko01100//Metabolic pathways;ko00520//Amino sugar and nucleotide sugar metabolism;ko04931//Insulin resistance;ko00250//Alanine, aspartate and glutamate metabolism	K00820;K00820;K00820;K00820	-	GO:0004360//glutamine-fructose-6-phosphate transaminase (isomerizing) activity;GO:0097367//carbohydrate derivative binding	GO:0006002//fructose 6-phosphate metabolic process;GO:0006047//UDP-N-acetylglucosamine metabolic process;GO:0006048//UDP-N-acetylglucosamine biosynthetic process;GO:0006487//protein N-linked glycosylation;GO:0006541//glutamine metabolic process;GO:1990830//cellular response to leukemia inhibitory factor
MSTRG.11800.2	Sfur005193	0.989183082	4.29E-07	Mvd	Diphosphomevalonate decarboxylase	Metabolism;Metabolism	Global and overview maps;Metabolism of terpenoids and polyketides	ko01100//Metabolic pathways;ko00900//Terpenoid backbone biosynthesis	K01597;K01597	GO:0005777//peroxisome;GO:0005782//peroxisomal matrix;GO:0005829//cytosol	GO:0004163//diphosphomevalonate decarboxylase activity;GO:0005524//ATP binding;GO:0030544//Hsp70 protein binding;GO:0042803//protein homodimerization activity	GO:0006695//cholesterol biosynthetic process;GO:0008284//positive regulation of cell proliferation;GO:0008299//isoprenoid biosynthetic process;GO:0019287//isopentenyl diphosphate biosynthetic process, mevalonate pathway
MSTRG.18098.3	Sfur005193	0.984393547	1.54E-06	Mvd	Diphosphomevalonate decarboxylase	Metabolism;Metabolism	Global and overview maps;Metabolism of terpenoids and polyketides	ko01100//Metabolic pathways;ko00900//Terpenoid backbone biosynthesis	K01597;K01597	GO:0005777//peroxisome;GO:0005782//peroxisomal matrix;GO:0005829//cytosol	GO:0004163//diphosphomevalonate decarboxylase activity;GO:0005524//ATP binding;GO:0030544//Hsp70 protein binding;GO:0042803//protein homodimerization activity	GO:0006695//cholesterol biosynthetic process;GO:0008284//positive regulation of cell proliferation;GO:0008299//isoprenoid biosynthetic process;GO:0019287//isopentenyl diphosphate biosynthetic process, mevalonate pathway
MSTRG.19109.1	Sfur005193	0.983159233	2.01E-06	Mvd	Diphosphomevalonate decarboxylase	Metabolism;Metabolism	Global and overview maps;Metabolism of terpenoids and polyketides	ko01100//Metabolic pathways;ko00900//Terpenoid backbone biosynthesis	K01597;K01597	GO:0005777//peroxisome;GO:0005782//peroxisomal matrix;GO:0005829//cytosol	GO:0004163//diphosphomevalonate decarboxylase activity;GO:0005524//ATP binding;GO:0030544//Hsp70 protein binding;GO:0042803//protein homodimerization activity	GO:0006695//cholesterol biosynthetic process;GO:0008284//positive regulation of cell proliferation;GO:0008299//isoprenoid biosynthetic process;GO:0019287//isopentenyl diphosphate biosynthetic process, mevalonate pathway
MSTRG.32068.1	Sfur005193	0.990455119	2.77E-07	Mvd	Diphosphomevalonate decarboxylase	Metabolism;Metabolism	Global and overview maps;Metabolism of terpenoids and polyketides	ko01100//Metabolic pathways;ko00900//Terpenoid backbone biosynthesis	K01597;K01597	GO:0005777//peroxisome;GO:0005782//peroxisomal matrix;GO:0005829//cytosol	GO:0004163//diphosphomevalonate decarboxylase activity;GO:0005524//ATP binding;GO:0030544//Hsp70 protein binding;GO:0042803//protein homodimerization activity	GO:0006695//cholesterol biosynthetic process;GO:0008284//positive regulation of cell proliferation;GO:0008299//isoprenoid biosynthetic process;GO:0019287//isopentenyl diphosphate biosynthetic process, mevalonate pathway
MSTRG.33772.1	Sfur005193	0.983453869	1.89E-06	Mvd	Diphosphomevalonate decarboxylase	Metabolism;Metabolism	Global and overview maps;Metabolism of terpenoids and polyketides	ko01100//Metabolic pathways;ko00900//Terpenoid backbone biosynthesis	K01597;K01597	GO:0005777//peroxisome;GO:0005782//peroxisomal matrix;GO:0005829//cytosol	GO:0004163//diphosphomevalonate decarboxylase activity;GO:0005524//ATP binding;GO:0030544//Hsp70 protein binding;GO:0042803//protein homodimerization activity	GO:0006695//cholesterol biosynthetic process;GO:0008284//positive regulation of cell proliferation;GO:0008299//isoprenoid biosynthetic process;GO:0019287//isopentenyl diphosphate biosynthetic process, mevalonate pathway
MSTRG.33773.1	Sfur005193	0.981205891	2.94E-06	Mvd	Diphosphomevalonate decarboxylase	Metabolism;Metabolism	Global and overview maps;Metabolism of terpenoids and polyketides	ko01100//Metabolic pathways;ko00900//Terpenoid backbone biosynthesis	K01597;K01597	GO:0005777//peroxisome;GO:0005782//peroxisomal matrix;GO:0005829//cytosol	GO:0004163//diphosphomevalonate decarboxylase activity;GO:0005524//ATP binding;GO:0030544//Hsp70 protein binding;GO:0042803//protein homodimerization activity	GO:0006695//cholesterol biosynthetic process;GO:0008284//positive regulation of cell proliferation;GO:0008299//isoprenoid biosynthetic process;GO:0019287//isopentenyl diphosphate biosynthetic process, mevalonate pathway
MSTRG.34229.1	Sfur005193	0.986879424	8.41E-07	Mvd	Diphosphomevalonate decarboxylase	Metabolism;Metabolism	Global and overview maps;Metabolism of terpenoids and polyketides	ko01100//Metabolic pathways;ko00900//Terpenoid backbone biosynthesis	K01597;K01597	GO:0005777//peroxisome;GO:0005782//peroxisomal matrix;GO:0005829//cytosol	GO:0004163//diphosphomevalonate decarboxylase activity;GO:0005524//ATP binding;GO:0030544//Hsp70 protein binding;GO:0042803//protein homodimerization activity	GO:0006695//cholesterol biosynthetic process;GO:0008284//positive regulation of cell proliferation;GO:0008299//isoprenoid biosynthetic process;GO:0019287//isopentenyl diphosphate biosynthetic process, mevalonate pathway
MSTRG.4917.1	Sfur005193	0.986559117	9.15E-07	Mvd	Diphosphomevalonate decarboxylase	Metabolism;Metabolism	Global and overview maps;Metabolism of terpenoids and polyketides	ko01100//Metabolic pathways;ko00900//Terpenoid backbone biosynthesis	K01597;K01597	GO:0005777//peroxisome;GO:0005782//peroxisomal matrix;GO:0005829//cytosol	GO:0004163//diphosphomevalonate decarboxylase activity;GO:0005524//ATP binding;GO:0030544//Hsp70 protein binding;GO:0042803//protein homodimerization activity	GO:0006695//cholesterol biosynthetic process;GO:0008284//positive regulation of cell proliferation;GO:0008299//isoprenoid biosynthetic process;GO:0019287//isopentenyl diphosphate biosynthetic process, mevalonate pathway
MSTRG.5073.2	Sfur005193	0.980191231	3.53E-06	Mvd	Diphosphomevalonate decarboxylase	Metabolism;Metabolism	Global and overview maps;Metabolism of terpenoids and polyketides	ko01100//Metabolic pathways;ko00900//Terpenoid backbone biosynthesis	K01597;K01597	GO:0005777//peroxisome;GO:0005782//peroxisomal matrix;GO:0005829//cytosol	GO:0004163//diphosphomevalonate decarboxylase activity;GO:0005524//ATP binding;GO:0030544//Hsp70 protein binding;GO:0042803//protein homodimerization activity	GO:0006695//cholesterol biosynthetic process;GO:0008284//positive regulation of cell proliferation;GO:0008299//isoprenoid biosynthetic process;GO:0019287//isopentenyl diphosphate biosynthetic process, mevalonate pathway
MSTRG.8569.3	Sfur005193	0.993462908	7.39E-08	Mvd	Diphosphomevalonate decarboxylase	Metabolism;Metabolism	Global and overview maps;Metabolism of terpenoids and polyketides	ko01100//Metabolic pathways;ko00900//Terpenoid backbone biosynthesis	K01597;K01597	GO:0005777//peroxisome;GO:0005782//peroxisomal matrix;GO:0005829//cytosol	GO:0004163//diphosphomevalonate decarboxylase activity;GO:0005524//ATP binding;GO:0030544//Hsp70 protein binding;GO:0042803//protein homodimerization activity	GO:0006695//cholesterol biosynthetic process;GO:0008284//positive regulation of cell proliferation;GO:0008299//isoprenoid biosynthetic process;GO:0019287//isopentenyl diphosphate biosynthetic process, mevalonate pathway
MSTRG.21077.2	Sfur005682	0.98085119	3.14E-06	--	C3 and PZP-like alpha-2-macroglobulin domain-containing protein 8	Cellular Processes;Human Diseases	Transport and catabolism;Infectious diseases	ko04145//Phagosome;ko05152//Tuberculosis	K06560;K06560	GO:0005615//extracellular space;GO:0005886//plasma membrane	GO:0004867//serine-type endopeptidase inhibitor activity	GO:0001654//eye development
MSTRG.23081.2	Sfur005682	0.982290243	2.39E-06	--	C3 and PZP-like alpha-2-macroglobulin domain-containing protein 8	Cellular Processes;Human Diseases	Transport and catabolism;Infectious diseases	ko04145//Phagosome;ko05152//Tuberculosis	K06560;K06560	GO:0005615//extracellular space;GO:0005886//plasma membrane	GO:0004867//serine-type endopeptidase inhibitor activity	GO:0001654//eye development
MSTRG.25629.14	Sfur005682	0.980360448	3.43E-06	--	C3 and PZP-like alpha-2-macroglobulin domain-containing protein 8	Cellular Processes;Human Diseases	Transport and catabolism;Infectious diseases	ko04145//Phagosome;ko05152//Tuberculosis	K06560;K06560	GO:0005615//extracellular space;GO:0005886//plasma membrane	GO:0004867//serine-type endopeptidase inhibitor activity	GO:0001654//eye development
MSTRG.2861.1	Sfur005682	0.98280978	2.16E-06	--	C3 and PZP-like alpha-2-macroglobulin domain-containing protein 8	Cellular Processes;Human Diseases	Transport and catabolism;Infectious diseases	ko04145//Phagosome;ko05152//Tuberculosis	K06560;K06560	GO:0005615//extracellular space;GO:0005886//plasma membrane	GO:0004867//serine-type endopeptidase inhibitor activity	GO:0001654//eye development
MSTRG.10562.1	Sfur006894	0.986756525	8.69E-07	Gnpnat	Probable glucosamine 6-phosphate N-acetyltransferase	Metabolism;Metabolism	Global and overview maps;Carbohydrate metabolism	ko01100//Metabolic pathways;ko00520//Amino sugar and nucleotide sugar metabolism	K00621;K00621	GO:0005783//endoplasmic reticulum;GO:0005793//endoplasmic reticulum-Golgi intermediate compartment;GO:0005794//Golgi apparatus	GO:0004343//glucosamine 6-phosphate N-acetyltransferase activity;GO:0008080//N-acetyltransferase activity;GO:0048029//monosaccharide binding	GO:0006048//UDP-N-acetylglucosamine biosynthetic process
MSTRG.11199.1	Sfur006894	0.98287708	2.13E-06	Gnpnat	Probable glucosamine 6-phosphate N-acetyltransferase	Metabolism;Metabolism	Global and overview maps;Carbohydrate metabolism	ko01100//Metabolic pathways;ko00520//Amino sugar and nucleotide sugar metabolism	K00621;K00621	GO:0005783//endoplasmic reticulum;GO:0005793//endoplasmic reticulum-Golgi intermediate compartment;GO:0005794//Golgi apparatus	GO:0004343//glucosamine 6-phosphate N-acetyltransferase activity;GO:0008080//N-acetyltransferase activity;GO:0048029//monosaccharide binding	GO:0006048//UDP-N-acetylglucosamine biosynthetic process
MSTRG.11349.1	Sfur006894	0.983712601	1.79E-06	Gnpnat	Probable glucosamine 6-phosphate N-acetyltransferase	Metabolism;Metabolism	Global and overview maps;Carbohydrate metabolism	ko01100//Metabolic pathways;ko00520//Amino sugar and nucleotide sugar metabolism	K00621;K00621	GO:0005783//endoplasmic reticulum;GO:0005793//endoplasmic reticulum-Golgi intermediate compartment;GO:0005794//Golgi apparatus	GO:0004343//glucosamine 6-phosphate N-acetyltransferase activity;GO:0008080//N-acetyltransferase activity;GO:0048029//monosaccharide binding	GO:0006048//UDP-N-acetylglucosamine biosynthetic process
MSTRG.12968.2	Sfur006894	0.981216822	2.94E-06	Gnpnat	Probable glucosamine 6-phosphate N-acetyltransferase	Metabolism;Metabolism	Global and overview maps;Carbohydrate metabolism	ko01100//Metabolic pathways;ko00520//Amino sugar and nucleotide sugar metabolism	K00621;K00621	GO:0005783//endoplasmic reticulum;GO:0005793//endoplasmic reticulum-Golgi intermediate compartment;GO:0005794//Golgi apparatus	GO:0004343//glucosamine 6-phosphate N-acetyltransferase activity;GO:0008080//N-acetyltransferase activity;GO:0048029//monosaccharide binding	GO:0006048//UDP-N-acetylglucosamine biosynthetic process
MSTRG.16086.1	Sfur006894	0.9842377	1.59E-06	Gnpnat	Probable glucosamine 6-phosphate N-acetyltransferase	Metabolism;Metabolism	Global and overview maps;Carbohydrate metabolism	ko01100//Metabolic pathways;ko00520//Amino sugar and nucleotide sugar metabolism	K00621;K00621	GO:0005783//endoplasmic reticulum;GO:0005793//endoplasmic reticulum-Golgi intermediate compartment;GO:0005794//Golgi apparatus	GO:0004343//glucosamine 6-phosphate N-acetyltransferase activity;GO:0008080//N-acetyltransferase activity;GO:0048029//monosaccharide binding	GO:0006048//UDP-N-acetylglucosamine biosynthetic process
MSTRG.16087.1	Sfur006894	0.986527401	9.22E-07	Gnpnat	Probable glucosamine 6-phosphate N-acetyltransferase	Metabolism;Metabolism	Global and overview maps;Carbohydrate metabolism	ko01100//Metabolic pathways;ko00520//Amino sugar and nucleotide sugar metabolism	K00621;K00621	GO:0005783//endoplasmic reticulum;GO:0005793//endoplasmic reticulum-Golgi intermediate compartment;GO:0005794//Golgi apparatus	GO:0004343//glucosamine 6-phosphate N-acetyltransferase activity;GO:0008080//N-acetyltransferase activity;GO:0048029//monosaccharide binding	GO:0006048//UDP-N-acetylglucosamine biosynthetic process
MSTRG.18015.1	Sfur006894	0.982372522	2.35E-06	Gnpnat	Probable glucosamine 6-phosphate N-acetyltransferase	Metabolism;Metabolism	Global and overview maps;Carbohydrate metabolism	ko01100//Metabolic pathways;ko00520//Amino sugar and nucleotide sugar metabolism	K00621;K00621	GO:0005783//endoplasmic reticulum;GO:0005793//endoplasmic reticulum-Golgi intermediate compartment;GO:0005794//Golgi apparatus	GO:0004343//glucosamine 6-phosphate N-acetyltransferase activity;GO:0008080//N-acetyltransferase activity;GO:0048029//monosaccharide binding	GO:0006048//UDP-N-acetylglucosamine biosynthetic process
MSTRG.18635.5	Sfur006894	0.981217744	2.94E-06	Gnpnat	Probable glucosamine 6-phosphate N-acetyltransferase	Metabolism;Metabolism	Global and overview maps;Carbohydrate metabolism	ko01100//Metabolic pathways;ko00520//Amino sugar and nucleotide sugar metabolism	K00621;K00621	GO:0005783//endoplasmic reticulum;GO:0005793//endoplasmic reticulum-Golgi intermediate compartment;GO:0005794//Golgi apparatus	GO:0004343//glucosamine 6-phosphate N-acetyltransferase activity;GO:0008080//N-acetyltransferase activity;GO:0048029//monosaccharide binding	GO:0006048//UDP-N-acetylglucosamine biosynthetic process
MSTRG.20058.1	Sfur006894	0.986967294	8.22E-07	Gnpnat	Probable glucosamine 6-phosphate N-acetyltransferase	Metabolism;Metabolism	Global and overview maps;Carbohydrate metabolism	ko01100//Metabolic pathways;ko00520//Amino sugar and nucleotide sugar metabolism	K00621;K00621	GO:0005783//endoplasmic reticulum;GO:0005793//endoplasmic reticulum-Golgi intermediate compartment;GO:0005794//Golgi apparatus	GO:0004343//glucosamine 6-phosphate N-acetyltransferase activity;GO:0008080//N-acetyltransferase activity;GO:0048029//monosaccharide binding	GO:0006048//UDP-N-acetylglucosamine biosynthetic process
MSTRG.20196.1	Sfur006894	0.984116637	1.64E-06	Gnpnat	Probable glucosamine 6-phosphate N-acetyltransferase	Metabolism;Metabolism	Global and overview maps;Carbohydrate metabolism	ko01100//Metabolic pathways;ko00520//Amino sugar and nucleotide sugar metabolism	K00621;K00621	GO:0005783//endoplasmic reticulum;GO:0005793//endoplasmic reticulum-Golgi intermediate compartment;GO:0005794//Golgi apparatus	GO:0004343//glucosamine 6-phosphate N-acetyltransferase activity;GO:0008080//N-acetyltransferase activity;GO:0048029//monosaccharide binding	GO:0006048//UDP-N-acetylglucosamine biosynthetic process
MSTRG.21441.2	Sfur006894	0.993531606	7.12E-08	Gnpnat	Probable glucosamine 6-phosphate N-acetyltransferase	Metabolism;Metabolism	Global and overview maps;Carbohydrate metabolism	ko01100//Metabolic pathways;ko00520//Amino sugar and nucleotide sugar metabolism	K00621;K00621	GO:0005783//endoplasmic reticulum;GO:0005793//endoplasmic reticulum-Golgi intermediate compartment;GO:0005794//Golgi apparatus	GO:0004343//glucosamine 6-phosphate N-acetyltransferase activity;GO:0008080//N-acetyltransferase activity;GO:0048029//monosaccharide binding	GO:0006048//UDP-N-acetylglucosamine biosynthetic process
MSTRG.21853.1	Sfur006894	0.98541035	1.22E-06	Gnpnat	Probable glucosamine 6-phosphate N-acetyltransferase	Metabolism;Metabolism	Global and overview maps;Carbohydrate metabolism	ko01100//Metabolic pathways;ko00520//Amino sugar and nucleotide sugar metabolism	K00621;K00621	GO:0005783//endoplasmic reticulum;GO:0005793//endoplasmic reticulum-Golgi intermediate compartment;GO:0005794//Golgi apparatus	GO:0004343//glucosamine 6-phosphate N-acetyltransferase activity;GO:0008080//N-acetyltransferase activity;GO:0048029//monosaccharide binding	GO:0006048//UDP-N-acetylglucosamine biosynthetic process
MSTRG.2257.2	Sfur006894	0.986835891	8.51E-07	Gnpnat	Probable glucosamine 6-phosphate N-acetyltransferase	Metabolism;Metabolism	Global and overview maps;Carbohydrate metabolism	ko01100//Metabolic pathways;ko00520//Amino sugar and nucleotide sugar metabolism	K00621;K00621	GO:0005783//endoplasmic reticulum;GO:0005793//endoplasmic reticulum-Golgi intermediate compartment;GO:0005794//Golgi apparatus	GO:0004343//glucosamine 6-phosphate N-acetyltransferase activity;GO:0008080//N-acetyltransferase activity;GO:0048029//monosaccharide binding	GO:0006048//UDP-N-acetylglucosamine biosynthetic process
MSTRG.22908.1	Sfur006894	0.990667849	2.56E-07	Gnpnat	Probable glucosamine 6-phosphate N-acetyltransferase	Metabolism;Metabolism	Global and overview maps;Carbohydrate metabolism	ko01100//Metabolic pathways;ko00520//Amino sugar and nucleotide sugar metabolism	K00621;K00621	GO:0005783//endoplasmic reticulum;GO:0005793//endoplasmic reticulum-Golgi intermediate compartment;GO:0005794//Golgi apparatus	GO:0004343//glucosamine 6-phosphate N-acetyltransferase activity;GO:0008080//N-acetyltransferase activity;GO:0048029//monosaccharide binding	GO:0006048//UDP-N-acetylglucosamine biosynthetic process
MSTRG.23081.2	Sfur006894	0.981578253	2.74E-06	Gnpnat	Probable glucosamine 6-phosphate N-acetyltransferase	Metabolism;Metabolism	Global and overview maps;Carbohydrate metabolism	ko01100//Metabolic pathways;ko00520//Amino sugar and nucleotide sugar metabolism	K00621;K00621	GO:0005783//endoplasmic reticulum;GO:0005793//endoplasmic reticulum-Golgi intermediate compartment;GO:0005794//Golgi apparatus	GO:0004343//glucosamine 6-phosphate N-acetyltransferase activity;GO:0008080//N-acetyltransferase activity;GO:0048029//monosaccharide binding	GO:0006048//UDP-N-acetylglucosamine biosynthetic process
MSTRG.2447.1	Sfur006894	0.984982985	1.35E-06	Gnpnat	Probable glucosamine 6-phosphate N-acetyltransferase	Metabolism;Metabolism	Global and overview maps;Carbohydrate metabolism	ko01100//Metabolic pathways;ko00520//Amino sugar and nucleotide sugar metabolism	K00621;K00621	GO:0005783//endoplasmic reticulum;GO:0005793//endoplasmic reticulum-Golgi intermediate compartment;GO:0005794//Golgi apparatus	GO:0004343//glucosamine 6-phosphate N-acetyltransferase activity;GO:0008080//N-acetyltransferase activity;GO:0048029//monosaccharide binding	GO:0006048//UDP-N-acetylglucosamine biosynthetic process
MSTRG.25634.1	Sfur006894	0.995400428	2.16E-08	Gnpnat	Probable glucosamine 6-phosphate N-acetyltransferase	Metabolism;Metabolism	Global and overview maps;Carbohydrate metabolism	ko01100//Metabolic pathways;ko00520//Amino sugar and nucleotide sugar metabolism	K00621;K00621	GO:0005783//endoplasmic reticulum;GO:0005793//endoplasmic reticulum-Golgi intermediate compartment;GO:0005794//Golgi apparatus	GO:0004343//glucosamine 6-phosphate N-acetyltransferase activity;GO:0008080//N-acetyltransferase activity;GO:0048029//monosaccharide binding	GO:0006048//UDP-N-acetylglucosamine biosynthetic process
MSTRG.25635.1	Sfur006894	0.981641441	2.71E-06	Gnpnat	Probable glucosamine 6-phosphate N-acetyltransferase	Metabolism;Metabolism	Global and overview maps;Carbohydrate metabolism	ko01100//Metabolic pathways;ko00520//Amino sugar and nucleotide sugar metabolism	K00621;K00621	GO:0005783//endoplasmic reticulum;GO:0005793//endoplasmic reticulum-Golgi intermediate compartment;GO:0005794//Golgi apparatus	GO:0004343//glucosamine 6-phosphate N-acetyltransferase activity;GO:0008080//N-acetyltransferase activity;GO:0048029//monosaccharide binding	GO:0006048//UDP-N-acetylglucosamine biosynthetic process
MSTRG.27226.1	Sfur006894	0.982611608	2.24E-06	Gnpnat	Probable glucosamine 6-phosphate N-acetyltransferase	Metabolism;Metabolism	Global and overview maps;Carbohydrate metabolism	ko01100//Metabolic pathways;ko00520//Amino sugar and nucleotide sugar metabolism	K00621;K00621	GO:0005783//endoplasmic reticulum;GO:0005793//endoplasmic reticulum-Golgi intermediate compartment;GO:0005794//Golgi apparatus	GO:0004343//glucosamine 6-phosphate N-acetyltransferase activity;GO:0008080//N-acetyltransferase activity;GO:0048029//monosaccharide binding	GO:0006048//UDP-N-acetylglucosamine biosynthetic process
MSTRG.28253.4	Sfur006894	0.989328934	4.09E-07	Gnpnat	Probable glucosamine 6-phosphate N-acetyltransferase	Metabolism;Metabolism	Global and overview maps;Carbohydrate metabolism	ko01100//Metabolic pathways;ko00520//Amino sugar and nucleotide sugar metabolism	K00621;K00621	GO:0005783//endoplasmic reticulum;GO:0005793//endoplasmic reticulum-Golgi intermediate compartment;GO:0005794//Golgi apparatus	GO:0004343//glucosamine 6-phosphate N-acetyltransferase activity;GO:0008080//N-acetyltransferase activity;GO:0048029//monosaccharide binding	GO:0006048//UDP-N-acetylglucosamine biosynthetic process
MSTRG.30274.1	Sfur006894	0.982529423	2.28E-06	Gnpnat	Probable glucosamine 6-phosphate N-acetyltransferase	Metabolism;Metabolism	Global and overview maps;Carbohydrate metabolism	ko01100//Metabolic pathways;ko00520//Amino sugar and nucleotide sugar metabolism	K00621;K00621	GO:0005783//endoplasmic reticulum;GO:0005793//endoplasmic reticulum-Golgi intermediate compartment;GO:0005794//Golgi apparatus	GO:0004343//glucosamine 6-phosphate N-acetyltransferase activity;GO:0008080//N-acetyltransferase activity;GO:0048029//monosaccharide binding	GO:0006048//UDP-N-acetylglucosamine biosynthetic process
MSTRG.32766.1	Sfur006894	0.981908892	2.58E-06	Gnpnat	Probable glucosamine 6-phosphate N-acetyltransferase	Metabolism;Metabolism	Global and overview maps;Carbohydrate metabolism	ko01100//Metabolic pathways;ko00520//Amino sugar and nucleotide sugar metabolism	K00621;K00621	GO:0005783//endoplasmic reticulum;GO:0005793//endoplasmic reticulum-Golgi intermediate compartment;GO:0005794//Golgi apparatus	GO:0004343//glucosamine 6-phosphate N-acetyltransferase activity;GO:0008080//N-acetyltransferase activity;GO:0048029//monosaccharide binding	GO:0006048//UDP-N-acetylglucosamine biosynthetic process
MSTRG.33771.1	Sfur006894	0.982163366	2.45E-06	Gnpnat	Probable glucosamine 6-phosphate N-acetyltransferase	Metabolism;Metabolism	Global and overview maps;Carbohydrate metabolism	ko01100//Metabolic pathways;ko00520//Amino sugar and nucleotide sugar metabolism	K00621;K00621	GO:0005783//endoplasmic reticulum;GO:0005793//endoplasmic reticulum-Golgi intermediate compartment;GO:0005794//Golgi apparatus	GO:0004343//glucosamine 6-phosphate N-acetyltransferase activity;GO:0008080//N-acetyltransferase activity;GO:0048029//monosaccharide binding	GO:0006048//UDP-N-acetylglucosamine biosynthetic process
MSTRG.34473.3	Sfur006894	0.984792985	1.41E-06	Gnpnat	Probable glucosamine 6-phosphate N-acetyltransferase	Metabolism;Metabolism	Global and overview maps;Carbohydrate metabolism	ko01100//Metabolic pathways;ko00520//Amino sugar and nucleotide sugar metabolism	K00621;K00621	GO:0005783//endoplasmic reticulum;GO:0005793//endoplasmic reticulum-Golgi intermediate compartment;GO:0005794//Golgi apparatus	GO:0004343//glucosamine 6-phosphate N-acetyltransferase activity;GO:0008080//N-acetyltransferase activity;GO:0048029//monosaccharide binding	GO:0006048//UDP-N-acetylglucosamine biosynthetic process
MSTRG.34474.2	Sfur006894	0.98935229	4.06E-07	Gnpnat	Probable glucosamine 6-phosphate N-acetyltransferase	Metabolism;Metabolism	Global and overview maps;Carbohydrate metabolism	ko01100//Metabolic pathways;ko00520//Amino sugar and nucleotide sugar metabolism	K00621;K00621	GO:0005783//endoplasmic reticulum;GO:0005793//endoplasmic reticulum-Golgi intermediate compartment;GO:0005794//Golgi apparatus	GO:0004343//glucosamine 6-phosphate N-acetyltransferase activity;GO:0008080//N-acetyltransferase activity;GO:0048029//monosaccharide binding	GO:0006048//UDP-N-acetylglucosamine biosynthetic process
MSTRG.36079.1	Sfur006894	0.985717032	1.13E-06	Gnpnat	Probable glucosamine 6-phosphate N-acetyltransferase	Metabolism;Metabolism	Global and overview maps;Carbohydrate metabolism	ko01100//Metabolic pathways;ko00520//Amino sugar and nucleotide sugar metabolism	K00621;K00621	GO:0005783//endoplasmic reticulum;GO:0005793//endoplasmic reticulum-Golgi intermediate compartment;GO:0005794//Golgi apparatus	GO:0004343//glucosamine 6-phosphate N-acetyltransferase activity;GO:0008080//N-acetyltransferase activity;GO:0048029//monosaccharide binding	GO:0006048//UDP-N-acetylglucosamine biosynthetic process
MSTRG.3765.1	Sfur006894	0.996405451	9.14E-09	Gnpnat	Probable glucosamine 6-phosphate N-acetyltransferase	Metabolism;Metabolism	Global and overview maps;Carbohydrate metabolism	ko01100//Metabolic pathways;ko00520//Amino sugar and nucleotide sugar metabolism	K00621;K00621	GO:0005783//endoplasmic reticulum;GO:0005793//endoplasmic reticulum-Golgi intermediate compartment;GO:0005794//Golgi apparatus	GO:0004343//glucosamine 6-phosphate N-acetyltransferase activity;GO:0008080//N-acetyltransferase activity;GO:0048029//monosaccharide binding	GO:0006048//UDP-N-acetylglucosamine biosynthetic process
MSTRG.38291.5	Sfur006894	0.994283272	4.63E-08	Gnpnat	Probable glucosamine 6-phosphate N-acetyltransferase	Metabolism;Metabolism	Global and overview maps;Carbohydrate metabolism	ko01100//Metabolic pathways;ko00520//Amino sugar and nucleotide sugar metabolism	K00621;K00621	GO:0005783//endoplasmic reticulum;GO:0005793//endoplasmic reticulum-Golgi intermediate compartment;GO:0005794//Golgi apparatus	GO:0004343//glucosamine 6-phosphate N-acetyltransferase activity;GO:0008080//N-acetyltransferase activity;GO:0048029//monosaccharide binding	GO:0006048//UDP-N-acetylglucosamine biosynthetic process
MSTRG.8295.1	Sfur006894	0.982796273	2.16E-06	Gnpnat	Probable glucosamine 6-phosphate N-acetyltransferase	Metabolism;Metabolism	Global and overview maps;Carbohydrate metabolism	ko01100//Metabolic pathways;ko00520//Amino sugar and nucleotide sugar metabolism	K00621;K00621	GO:0005783//endoplasmic reticulum;GO:0005793//endoplasmic reticulum-Golgi intermediate compartment;GO:0005794//Golgi apparatus	GO:0004343//glucosamine 6-phosphate N-acetyltransferase activity;GO:0008080//N-acetyltransferase activity;GO:0048029//monosaccharide binding	GO:0006048//UDP-N-acetylglucosamine biosynthetic process
MSTRG.8569.4	Sfur006894	0.980309252	3.46E-06	Gnpnat	Probable glucosamine 6-phosphate N-acetyltransferase	Metabolism;Metabolism	Global and overview maps;Carbohydrate metabolism	ko01100//Metabolic pathways;ko00520//Amino sugar and nucleotide sugar metabolism	K00621;K00621	GO:0005783//endoplasmic reticulum;GO:0005793//endoplasmic reticulum-Golgi intermediate compartment;GO:0005794//Golgi apparatus	GO:0004343//glucosamine 6-phosphate N-acetyltransferase activity;GO:0008080//N-acetyltransferase activity;GO:0048029//monosaccharide binding	GO:0006048//UDP-N-acetylglucosamine biosynthetic process
MSTRG.34897.5	Sfur007397	0.987343391	7.42E-07	--	Putative uncharacterized protein	-	-	-	-	-	-	-
MSTRG.10749.1	Sfur007443	0.988510174	5.29E-07	Hr3	Probable nuclear hormone receptor HR3	-	-	-	-	GO:0005634//nucleus	GO:0000977//RNA polymerase II regulatory region sequence-specific DNA binding;GO:0004879//RNA polymerase II transcription factor activity, ligand-activated sequence-specific DNA binding;GO:0008270//zinc ion binding	GO:0000122//negative regulation of transcription from RNA polymerase II promoter;GO:0007552//metamorphosis;GO:0016319//mushroom body development;GO:0040034//regulation of development, heterochronic;GO:0045944//positive regulation of transcription from RNA polymerase II promoter
MSTRG.11800.2	Sfur007443	0.992693292	1.09E-07	Hr3	Probable nuclear hormone receptor HR3	-	-	-	-	GO:0005634//nucleus	GO:0000977//RNA polymerase II regulatory region sequence-specific DNA binding;GO:0004879//RNA polymerase II transcription factor activity, ligand-activated sequence-specific DNA binding;GO:0008270//zinc ion binding	GO:0000122//negative regulation of transcription from RNA polymerase II promoter;GO:0007552//metamorphosis;GO:0016319//mushroom body development;GO:0040034//regulation of development, heterochronic;GO:0045944//positive regulation of transcription from RNA polymerase II promoter
MSTRG.12179.1	Sfur007443	0.998834097	1.78E-10	Hr3	Probable nuclear hormone receptor HR3	-	-	-	-	GO:0005634//nucleus	GO:0000977//RNA polymerase II regulatory region sequence-specific DNA binding;GO:0004879//RNA polymerase II transcription factor activity, ligand-activated sequence-specific DNA binding;GO:0008270//zinc ion binding	GO:0000122//negative regulation of transcription from RNA polymerase II promoter;GO:0007552//metamorphosis;GO:0016319//mushroom body development;GO:0040034//regulation of development, heterochronic;GO:0045944//positive regulation of transcription from RNA polymerase II promoter
MSTRG.12854.1	Sfur007443	0.981495707	2.79E-06	Hr3	Probable nuclear hormone receptor HR3	-	-	-	-	GO:0005634//nucleus	GO:0000977//RNA polymerase II regulatory region sequence-specific DNA binding;GO:0004879//RNA polymerase II transcription factor activity, ligand-activated sequence-specific DNA binding;GO:0008270//zinc ion binding	GO:0000122//negative regulation of transcription from RNA polymerase II promoter;GO:0007552//metamorphosis;GO:0016319//mushroom body development;GO:0040034//regulation of development, heterochronic;GO:0045944//positive regulation of transcription from RNA polymerase II promoter
MSTRG.14275.1	Sfur007443	0.989251167	4.20E-07	Hr3	Probable nuclear hormone receptor HR3	-	-	-	-	GO:0005634//nucleus	GO:0000977//RNA polymerase II regulatory region sequence-specific DNA binding;GO:0004879//RNA polymerase II transcription factor activity, ligand-activated sequence-specific DNA binding;GO:0008270//zinc ion binding	GO:0000122//negative regulation of transcription from RNA polymerase II promoter;GO:0007552//metamorphosis;GO:0016319//mushroom body development;GO:0040034//regulation of development, heterochronic;GO:0045944//positive regulation of transcription from RNA polymerase II promoter
MSTRG.16909.1	Sfur007443	0.989531116	3.83E-07	Hr3	Probable nuclear hormone receptor HR3	-	-	-	-	GO:0005634//nucleus	GO:0000977//RNA polymerase II regulatory region sequence-specific DNA binding;GO:0004879//RNA polymerase II transcription factor activity, ligand-activated sequence-specific DNA binding;GO:0008270//zinc ion binding	GO:0000122//negative regulation of transcription from RNA polymerase II promoter;GO:0007552//metamorphosis;GO:0016319//mushroom body development;GO:0040034//regulation of development, heterochronic;GO:0045944//positive regulation of transcription from RNA polymerase II promoter
MSTRG.18098.3	Sfur007443	0.984382887	1.54E-06	Hr3	Probable nuclear hormone receptor HR3	-	-	-	-	GO:0005634//nucleus	GO:0000977//RNA polymerase II regulatory region sequence-specific DNA binding;GO:0004879//RNA polymerase II transcription factor activity, ligand-activated sequence-specific DNA binding;GO:0008270//zinc ion binding	GO:0000122//negative regulation of transcription from RNA polymerase II promoter;GO:0007552//metamorphosis;GO:0016319//mushroom body development;GO:0040034//regulation of development, heterochronic;GO:0045944//positive regulation of transcription from RNA polymerase II promoter
MSTRG.1893.1	Sfur007443	0.980943389	3.09E-06	Hr3	Probable nuclear hormone receptor HR3	-	-	-	-	GO:0005634//nucleus	GO:0000977//RNA polymerase II regulatory region sequence-specific DNA binding;GO:0004879//RNA polymerase II transcription factor activity, ligand-activated sequence-specific DNA binding;GO:0008270//zinc ion binding	GO:0000122//negative regulation of transcription from RNA polymerase II promoter;GO:0007552//metamorphosis;GO:0016319//mushroom body development;GO:0040034//regulation of development, heterochronic;GO:0045944//positive regulation of transcription from RNA polymerase II promoter
MSTRG.19109.1	Sfur007443	0.98771388	6.69E-07	Hr3	Probable nuclear hormone receptor HR3	-	-	-	-	GO:0005634//nucleus	GO:0000977//RNA polymerase II regulatory region sequence-specific DNA binding;GO:0004879//RNA polymerase II transcription factor activity, ligand-activated sequence-specific DNA binding;GO:0008270//zinc ion binding	GO:0000122//negative regulation of transcription from RNA polymerase II promoter;GO:0007552//metamorphosis;GO:0016319//mushroom body development;GO:0040034//regulation of development, heterochronic;GO:0045944//positive regulation of transcription from RNA polymerase II promoter
MSTRG.21723.1	Sfur007443	0.982453257	2.32E-06	Hr3	Probable nuclear hormone receptor HR3	-	-	-	-	GO:0005634//nucleus	GO:0000977//RNA polymerase II regulatory region sequence-specific DNA binding;GO:0004879//RNA polymerase II transcription factor activity, ligand-activated sequence-specific DNA binding;GO:0008270//zinc ion binding	GO:0000122//negative regulation of transcription from RNA polymerase II promoter;GO:0007552//metamorphosis;GO:0016319//mushroom body development;GO:0040034//regulation of development, heterochronic;GO:0045944//positive regulation of transcription from RNA polymerase II promoter
MSTRG.32068.1	Sfur007443	0.994432547	4.22E-08	Hr3	Probable nuclear hormone receptor HR3	-	-	-	-	GO:0005634//nucleus	GO:0000977//RNA polymerase II regulatory region sequence-specific DNA binding;GO:0004879//RNA polymerase II transcription factor activity, ligand-activated sequence-specific DNA binding;GO:0008270//zinc ion binding	GO:0000122//negative regulation of transcription from RNA polymerase II promoter;GO:0007552//metamorphosis;GO:0016319//mushroom body development;GO:0040034//regulation of development, heterochronic;GO:0045944//positive regulation of transcription from RNA polymerase II promoter
MSTRG.33279.1	Sfur007443	0.997294102	3.38E-09	Hr3	Probable nuclear hormone receptor HR3	-	-	-	-	GO:0005634//nucleus	GO:0000977//RNA polymerase II regulatory region sequence-specific DNA binding;GO:0004879//RNA polymerase II transcription factor activity, ligand-activated sequence-specific DNA binding;GO:0008270//zinc ion binding	GO:0000122//negative regulation of transcription from RNA polymerase II promoter;GO:0007552//metamorphosis;GO:0016319//mushroom body development;GO:0040034//regulation of development, heterochronic;GO:0045944//positive regulation of transcription from RNA polymerase II promoter
MSTRG.33772.1	Sfur007443	0.998752321	2.26E-10	Hr3	Probable nuclear hormone receptor HR3	-	-	-	-	GO:0005634//nucleus	GO:0000977//RNA polymerase II regulatory region sequence-specific DNA binding;GO:0004879//RNA polymerase II transcription factor activity, ligand-activated sequence-specific DNA binding;GO:0008270//zinc ion binding	GO:0000122//negative regulation of transcription from RNA polymerase II promoter;GO:0007552//metamorphosis;GO:0016319//mushroom body development;GO:0040034//regulation of development, heterochronic;GO:0045944//positive regulation of transcription from RNA polymerase II promoter
MSTRG.34229.1	Sfur007443	0.995716078	1.69E-08	Hr3	Probable nuclear hormone receptor HR3	-	-	-	-	GO:0005634//nucleus	GO:0000977//RNA polymerase II regulatory region sequence-specific DNA binding;GO:0004879//RNA polymerase II transcription factor activity, ligand-activated sequence-specific DNA binding;GO:0008270//zinc ion binding	GO:0000122//negative regulation of transcription from RNA polymerase II promoter;GO:0007552//metamorphosis;GO:0016319//mushroom body development;GO:0040034//regulation of development, heterochronic;GO:0045944//positive regulation of transcription from RNA polymerase II promoter
MSTRG.36257.1	Sfur007443	0.987881825	6.37E-07	Hr3	Probable nuclear hormone receptor HR3	-	-	-	-	GO:0005634//nucleus	GO:0000977//RNA polymerase II regulatory region sequence-specific DNA binding;GO:0004879//RNA polymerase II transcription factor activity, ligand-activated sequence-specific DNA binding;GO:0008270//zinc ion binding	GO:0000122//negative regulation of transcription from RNA polymerase II promoter;GO:0007552//metamorphosis;GO:0016319//mushroom body development;GO:0040034//regulation of development, heterochronic;GO:0045944//positive regulation of transcription from RNA polymerase II promoter
MSTRG.39602.1	Sfur007443	0.988749124	4.92E-07	Hr3	Probable nuclear hormone receptor HR3	-	-	-	-	GO:0005634//nucleus	GO:0000977//RNA polymerase II regulatory region sequence-specific DNA binding;GO:0004879//RNA polymerase II transcription factor activity, ligand-activated sequence-specific DNA binding;GO:0008270//zinc ion binding	GO:0000122//negative regulation of transcription from RNA polymerase II promoter;GO:0007552//metamorphosis;GO:0016319//mushroom body development;GO:0040034//regulation of development, heterochronic;GO:0045944//positive regulation of transcription from RNA polymerase II promoter
MSTRG.6031.1	Sfur007443	0.983653538	1.81E-06	Hr3	Probable nuclear hormone receptor HR3	-	-	-	-	GO:0005634//nucleus	GO:0000977//RNA polymerase II regulatory region sequence-specific DNA binding;GO:0004879//RNA polymerase II transcription factor activity, ligand-activated sequence-specific DNA binding;GO:0008270//zinc ion binding	GO:0000122//negative regulation of transcription from RNA polymerase II promoter;GO:0007552//metamorphosis;GO:0016319//mushroom body development;GO:0040034//regulation of development, heterochronic;GO:0045944//positive regulation of transcription from RNA polymerase II promoter
MSTRG.8569.3	Sfur007443	0.982642264	2.23E-06	Hr3	Probable nuclear hormone receptor HR3	-	-	-	-	GO:0005634//nucleus	GO:0000977//RNA polymerase II regulatory region sequence-specific DNA binding;GO:0004879//RNA polymerase II transcription factor activity, ligand-activated sequence-specific DNA binding;GO:0008270//zinc ion binding	GO:0000122//negative regulation of transcription from RNA polymerase II promoter;GO:0007552//metamorphosis;GO:0016319//mushroom body development;GO:0040034//regulation of development, heterochronic;GO:0045944//positive regulation of transcription from RNA polymerase II promoter
MSTRG.5337.1	Sfur008450	0.982821128	2.15E-06	Chia	Endochitinase	Metabolism;Metabolism	Global and overview maps;Carbohydrate metabolism	ko01100//Metabolic pathways;ko00520//Amino sugar and nucleotide sugar metabolism	K01183;K01183	GO:0005576//extracellular region	GO:0004568//chitinase activity;GO:0008061//chitin binding	GO:0000272//polysaccharide catabolic process;GO:0006032//chitin catabolic process
MSTRG.32478.1	Sfur008604	0.984711134	1.43E-06	chs-2	Chitin synthase chs-2	Metabolism;Metabolism	Global and overview maps;Carbohydrate metabolism	ko01100//Metabolic pathways;ko00520//Amino sugar and nucleotide sugar metabolism	K00698;K00698	GO:0005886//plasma membrane;GO:0016021//integral component of membrane;GO:0030428//cell septum;GO:0071944//cell periphery	GO:0004100//chitin synthase activity	GO:0006031//chitin biosynthetic process;GO:0007275//multicellular organism development;GO:0061063//positive regulation of nematode larval development
MSTRG.33325.1	Sfur008604	-0.983772114	1.76E-06	chs-2	Chitin synthase chs-2	Metabolism;Metabolism	Global and overview maps;Carbohydrate metabolism	ko01100//Metabolic pathways;ko00520//Amino sugar and nucleotide sugar metabolism	K00698;K00698	GO:0005886//plasma membrane;GO:0016021//integral component of membrane;GO:0030428//cell septum;GO:0071944//cell periphery	GO:0004100//chitin synthase activity	GO:0006031//chitin biosynthetic process;GO:0007275//multicellular organism development;GO:0061063//positive regulation of nematode larval development
MSTRG.33325.1	Sfur008731	-0.981053637	3.03E-06	RXR	Retinoic acid receptor RXR	Human Diseases;Human Diseases;Environmental Information Processing;Human Diseases;Organismal Systems;Organismal Systems;Human Diseases;Organismal Systems;Human Diseases;Organismal Systems;Human Diseases;Organismal Systems;Human Diseases;Organismal Systems;Human Diseases	Cancers;Endocrine and metabolic diseases;Signal transduction;Cancers;Endocrine system;Digestive system;Cancers;Endocrine system;Infectious diseases;Endocrine system;Cancers;Endocrine system;Cancers;Immune system;Cancers	ko05200//Pathways in cancer;ko04932//Non-alcoholic fatty liver disease (NAFLD);ko04151//PI3K-Akt signaling pathway;ko05202//Transcriptional misregulation in cancers;ko04919//Thyroid hormone signaling pathway;ko04976//Bile secretion;ko05226//Gastric cancer;ko04928//Parathyroid hormone synthesis, secretion and action;ko05160//Hepatitis C;ko03320//PPAR signaling pathway;ko05222//Small cell lung canc…	K08524;K08524;K08524;K08524;K08524;K08524;K08524;K08524;K08524;K08524;K08524;K08524;K08524;K08524;K08524	GO:0005634//nucleus	GO:0003700//transcription factor activity, sequence-specific DNA binding;GO:0003707//steroid hormone receptor activity;GO:0008270//zinc ion binding;GO:0016918//retinal binding;GO:0043565//sequence-specific DNA binding	-
MSTRG.32265.2	Sfur009284	0.981592983	2.74E-06	--	Chitin deacetylase 1	-	-	-	-	GO:0005615//extracellular space	GO:0004099//chitin deacetylase activity;GO:0008061//chitin binding;GO:0008270//zinc ion binding	GO:0000272//polysaccharide catabolic process;GO:0006032//chitin catabolic process
MSTRG.34897.5	Sfur009284	0.98423412	1.60E-06	--	Chitin deacetylase 1	-	-	-	-	GO:0005615//extracellular space	GO:0004099//chitin deacetylase activity;GO:0008061//chitin binding;GO:0008270//zinc ion binding	GO:0000272//polysaccharide catabolic process;GO:0006032//chitin catabolic process
MSTRG.7675.1	Sfur009284	0.983029841	2.06E-06	--	Chitin deacetylase 1	-	-	-	-	GO:0005615//extracellular space	GO:0004099//chitin deacetylase activity;GO:0008061//chitin binding;GO:0008270//zinc ion binding	GO:0000272//polysaccharide catabolic process;GO:0006032//chitin catabolic process
MSTRG.11030.2	Sfur009756	0.984054676	1.66E-06	--	Chitin deacetylase 1	-	-	-	-	GO:0005615//extracellular space	GO:0004099//chitin deacetylase activity;GO:0008061//chitin binding;GO:0008270//zinc ion binding	GO:0000272//polysaccharide catabolic process;GO:0006032//chitin catabolic process
MSTRG.11199.1	Sfur009756	-0.981294116	2.89E-06	--	Chitin deacetylase 1	-	-	-	-	GO:0005615//extracellular space	GO:0004099//chitin deacetylase activity;GO:0008061//chitin binding;GO:0008270//zinc ion binding	GO:0000272//polysaccharide catabolic process;GO:0006032//chitin catabolic process
MSTRG.1847.1	Sfur009756	0.984719703	1.43E-06	--	Chitin deacetylase 1	-	-	-	-	GO:0005615//extracellular space	GO:0004099//chitin deacetylase activity;GO:0008061//chitin binding;GO:0008270//zinc ion binding	GO:0000272//polysaccharide catabolic process;GO:0006032//chitin catabolic process
MSTRG.19835.2	Sfur009756	0.983387632	1.91E-06	--	Chitin deacetylase 1	-	-	-	-	GO:0005615//extracellular space	GO:0004099//chitin deacetylase activity;GO:0008061//chitin binding;GO:0008270//zinc ion binding	GO:0000272//polysaccharide catabolic process;GO:0006032//chitin catabolic process
MSTRG.23212.1	Sfur009756	0.995236498	2.44E-08	--	Chitin deacetylase 1	-	-	-	-	GO:0005615//extracellular space	GO:0004099//chitin deacetylase activity;GO:0008061//chitin binding;GO:0008270//zinc ion binding	GO:0000272//polysaccharide catabolic process;GO:0006032//chitin catabolic process
MSTRG.25578.1	Sfur009756	-0.984188079	1.61E-06	--	Chitin deacetylase 1	-	-	-	-	GO:0005615//extracellular space	GO:0004099//chitin deacetylase activity;GO:0008061//chitin binding;GO:0008270//zinc ion binding	GO:0000272//polysaccharide catabolic process;GO:0006032//chitin catabolic process
MSTRG.26304.1	Sfur009756	-0.983286516	1.96E-06	--	Chitin deacetylase 1	-	-	-	-	GO:0005615//extracellular space	GO:0004099//chitin deacetylase activity;GO:0008061//chitin binding;GO:0008270//zinc ion binding	GO:0000272//polysaccharide catabolic process;GO:0006032//chitin catabolic process
MSTRG.29822.3	Sfur009756	-0.982538654	2.28E-06	--	Chitin deacetylase 1	-	-	-	-	GO:0005615//extracellular space	GO:0004099//chitin deacetylase activity;GO:0008061//chitin binding;GO:0008270//zinc ion binding	GO:0000272//polysaccharide catabolic process;GO:0006032//chitin catabolic process
MSTRG.32478.1	Sfur009756	0.985656758	1.15E-06	--	Chitin deacetylase 1	-	-	-	-	GO:0005615//extracellular space	GO:0004099//chitin deacetylase activity;GO:0008061//chitin binding;GO:0008270//zinc ion binding	GO:0000272//polysaccharide catabolic process;GO:0006032//chitin catabolic process
MSTRG.33709.1	Sfur009756	0.986729972	8.75E-07	--	Chitin deacetylase 1	-	-	-	-	GO:0005615//extracellular space	GO:0004099//chitin deacetylase activity;GO:0008061//chitin binding;GO:0008270//zinc ion binding	GO:0000272//polysaccharide catabolic process;GO:0006032//chitin catabolic process
MSTRG.7675.1	Sfur009756	0.981467264	2.80E-06	--	Chitin deacetylase 1	-	-	-	-	GO:0005615//extracellular space	GO:0004099//chitin deacetylase activity;GO:0008061//chitin binding;GO:0008270//zinc ion binding	GO:0000272//polysaccharide catabolic process;GO:0006032//chitin catabolic process
MSTRG.9698.2	Sfur009756	0.986593352	9.07E-07	--	Chitin deacetylase 1	-	-	-	-	GO:0005615//extracellular space	GO:0004099//chitin deacetylase activity;GO:0008061//chitin binding;GO:0008270//zinc ion binding	GO:0000272//polysaccharide catabolic process;GO:0006032//chitin catabolic process
MSTRG.10391.1	Sfur010151	0.989955833	3.31E-07	Eip78C	Ecdysone-induced protein 78C	-	-	-	-	GO:0005634//nucleus	GO:0003700//transcription factor activity, sequence-specific DNA binding;GO:0008270//zinc ion binding;GO:0043565//sequence-specific DNA binding	GO:0045892//negative regulation of transcription, DNA-templated
MSTRG.10749.1	Sfur010151	0.982449287	2.32E-06	Eip78C	Ecdysone-induced protein 78C	-	-	-	-	GO:0005634//nucleus	GO:0003700//transcription factor activity, sequence-specific DNA binding;GO:0008270//zinc ion binding;GO:0043565//sequence-specific DNA binding	GO:0045892//negative regulation of transcription, DNA-templated
MSTRG.11199.1	Sfur010151	0.985655266	1.15E-06	Eip78C	Ecdysone-induced protein 78C	-	-	-	-	GO:0005634//nucleus	GO:0003700//transcription factor activity, sequence-specific DNA binding;GO:0008270//zinc ion binding;GO:0043565//sequence-specific DNA binding	GO:0045892//negative regulation of transcription, DNA-templated
MSTRG.16908.1	Sfur010151	0.997916976	1.36E-09	Eip78C	Ecdysone-induced protein 78C	-	-	-	-	GO:0005634//nucleus	GO:0003700//transcription factor activity, sequence-specific DNA binding;GO:0008270//zinc ion binding;GO:0043565//sequence-specific DNA binding	GO:0045892//negative regulation of transcription, DNA-templated
MSTRG.18098.3	Sfur010151	0.983542226	1.85E-06	Eip78C	Ecdysone-induced protein 78C	-	-	-	-	GO:0005634//nucleus	GO:0003700//transcription factor activity, sequence-specific DNA binding;GO:0008270//zinc ion binding;GO:0043565//sequence-specific DNA binding	GO:0045892//negative regulation of transcription, DNA-templated
MSTRG.18635.5	Sfur010151	0.994716806	3.51E-08	Eip78C	Ecdysone-induced protein 78C	-	-	-	-	GO:0005634//nucleus	GO:0003700//transcription factor activity, sequence-specific DNA binding;GO:0008270//zinc ion binding;GO:0043565//sequence-specific DNA binding	GO:0045892//negative regulation of transcription, DNA-templated
MSTRG.20196.1	Sfur010151	0.995311327	2.31E-08	Eip78C	Ecdysone-induced protein 78C	-	-	-	-	GO:0005634//nucleus	GO:0003700//transcription factor activity, sequence-specific DNA binding;GO:0008270//zinc ion binding;GO:0043565//sequence-specific DNA binding	GO:0045892//negative regulation of transcription, DNA-templated
MSTRG.21259.5	Sfur010151	0.980927702	3.10E-06	Eip78C	Ecdysone-induced protein 78C	-	-	-	-	GO:0005634//nucleus	GO:0003700//transcription factor activity, sequence-specific DNA binding;GO:0008270//zinc ion binding;GO:0043565//sequence-specific DNA binding	GO:0045892//negative regulation of transcription, DNA-templated
MSTRG.21853.1	Sfur010151	0.982548844	2.27E-06	Eip78C	Ecdysone-induced protein 78C	-	-	-	-	GO:0005634//nucleus	GO:0003700//transcription factor activity, sequence-specific DNA binding;GO:0008270//zinc ion binding;GO:0043565//sequence-specific DNA binding	GO:0045892//negative regulation of transcription, DNA-templated
MSTRG.2257.2	Sfur010151	0.989505348	3.86E-07	Eip78C	Ecdysone-induced protein 78C	-	-	-	-	GO:0005634//nucleus	GO:0003700//transcription factor activity, sequence-specific DNA binding;GO:0008270//zinc ion binding;GO:0043565//sequence-specific DNA binding	GO:0045892//negative regulation of transcription, DNA-templated
MSTRG.22908.1	Sfur010151	0.990634571	2.59E-07	Eip78C	Ecdysone-induced protein 78C	-	-	-	-	GO:0005634//nucleus	GO:0003700//transcription factor activity, sequence-specific DNA binding;GO:0008270//zinc ion binding;GO:0043565//sequence-specific DNA binding	GO:0045892//negative regulation of transcription, DNA-templated
MSTRG.23081.2	Sfur010151	0.990193497	3.05E-07	Eip78C	Ecdysone-induced protein 78C	-	-	-	-	GO:0005634//nucleus	GO:0003700//transcription factor activity, sequence-specific DNA binding;GO:0008270//zinc ion binding;GO:0043565//sequence-specific DNA binding	GO:0045892//negative regulation of transcription, DNA-templated
MSTRG.2446.2	Sfur010151	0.982930058	2.10E-06	Eip78C	Ecdysone-induced protein 78C	-	-	-	-	GO:0005634//nucleus	GO:0003700//transcription factor activity, sequence-specific DNA binding;GO:0008270//zinc ion binding;GO:0043565//sequence-specific DNA binding	GO:0045892//negative regulation of transcription, DNA-templated
MSTRG.2447.1	Sfur010151	0.995012578	2.87E-08	Eip78C	Ecdysone-induced protein 78C	-	-	-	-	GO:0005634//nucleus	GO:0003700//transcription factor activity, sequence-specific DNA binding;GO:0008270//zinc ion binding;GO:0043565//sequence-specific DNA binding	GO:0045892//negative regulation of transcription, DNA-templated
MSTRG.25578.1	Sfur010151	0.988229718	5.76E-07	Eip78C	Ecdysone-induced protein 78C	-	-	-	-	GO:0005634//nucleus	GO:0003700//transcription factor activity, sequence-specific DNA binding;GO:0008270//zinc ion binding;GO:0043565//sequence-specific DNA binding	GO:0045892//negative regulation of transcription, DNA-templated
MSTRG.25629.14	Sfur010151	0.982000519	2.53E-06	Eip78C	Ecdysone-induced protein 78C	-	-	-	-	GO:0005634//nucleus	GO:0003700//transcription factor activity, sequence-specific DNA binding;GO:0008270//zinc ion binding;GO:0043565//sequence-specific DNA binding	GO:0045892//negative regulation of transcription, DNA-templated
MSTRG.27823.1	Sfur010151	0.986968832	8.21E-07	Eip78C	Ecdysone-induced protein 78C	-	-	-	-	GO:0005634//nucleus	GO:0003700//transcription factor activity, sequence-specific DNA binding;GO:0008270//zinc ion binding;GO:0043565//sequence-specific DNA binding	GO:0045892//negative regulation of transcription, DNA-templated
MSTRG.28253.4	Sfur010151	0.984187929	1.61E-06	Eip78C	Ecdysone-induced protein 78C	-	-	-	-	GO:0005634//nucleus	GO:0003700//transcription factor activity, sequence-specific DNA binding;GO:0008270//zinc ion binding;GO:0043565//sequence-specific DNA binding	GO:0045892//negative regulation of transcription, DNA-templated
MSTRG.2861.1	Sfur010151	0.9838735	1.73E-06	Eip78C	Ecdysone-induced protein 78C	-	-	-	-	GO:0005634//nucleus	GO:0003700//transcription factor activity, sequence-specific DNA binding;GO:0008270//zinc ion binding;GO:0043565//sequence-specific DNA binding	GO:0045892//negative regulation of transcription, DNA-templated
MSTRG.29822.3	Sfur010151	0.98053945	3.32E-06	Eip78C	Ecdysone-induced protein 78C	-	-	-	-	GO:0005634//nucleus	GO:0003700//transcription factor activity, sequence-specific DNA binding;GO:0008270//zinc ion binding;GO:0043565//sequence-specific DNA binding	GO:0045892//negative regulation of transcription, DNA-templated
MSTRG.30274.1	Sfur010151	0.984237576	1.59E-06	Eip78C	Ecdysone-induced protein 78C	-	-	-	-	GO:0005634//nucleus	GO:0003700//transcription factor activity, sequence-specific DNA binding;GO:0008270//zinc ion binding;GO:0043565//sequence-specific DNA binding	GO:0045892//negative regulation of transcription, DNA-templated
MSTRG.32068.1	Sfur010151	0.987877471	6.38E-07	Eip78C	Ecdysone-induced protein 78C	-	-	-	-	GO:0005634//nucleus	GO:0003700//transcription factor activity, sequence-specific DNA binding;GO:0008270//zinc ion binding;GO:0043565//sequence-specific DNA binding	GO:0045892//negative regulation of transcription, DNA-templated
MSTRG.32766.1	Sfur010151	0.982183901	2.44E-06	Eip78C	Ecdysone-induced protein 78C	-	-	-	-	GO:0005634//nucleus	GO:0003700//transcription factor activity, sequence-specific DNA binding;GO:0008270//zinc ion binding;GO:0043565//sequence-specific DNA binding	GO:0045892//negative regulation of transcription, DNA-templated
MSTRG.32768.1	Sfur010151	0.989976506	3.29E-07	Eip78C	Ecdysone-induced protein 78C	-	-	-	-	GO:0005634//nucleus	GO:0003700//transcription factor activity, sequence-specific DNA binding;GO:0008270//zinc ion binding;GO:0043565//sequence-specific DNA binding	GO:0045892//negative regulation of transcription, DNA-templated
MSTRG.33771.1	Sfur010151	0.992919281	9.77E-08	Eip78C	Ecdysone-induced protein 78C	-	-	-	-	GO:0005634//nucleus	GO:0003700//transcription factor activity, sequence-specific DNA binding;GO:0008270//zinc ion binding;GO:0043565//sequence-specific DNA binding	GO:0045892//negative regulation of transcription, DNA-templated
MSTRG.33773.1	Sfur010151	0.998324868	6.32E-10	Eip78C	Ecdysone-induced protein 78C	-	-	-	-	GO:0005634//nucleus	GO:0003700//transcription factor activity, sequence-specific DNA binding;GO:0008270//zinc ion binding;GO:0043565//sequence-specific DNA binding	GO:0045892//negative regulation of transcription, DNA-templated
MSTRG.33855.2	Sfur010151	0.992289593	1.32E-07	Eip78C	Ecdysone-induced protein 78C	-	-	-	-	GO:0005634//nucleus	GO:0003700//transcription factor activity, sequence-specific DNA binding;GO:0008270//zinc ion binding;GO:0043565//sequence-specific DNA binding	GO:0045892//negative regulation of transcription, DNA-templated
MSTRG.34229.1	Sfur010151	0.986688472	8.85E-07	Eip78C	Ecdysone-induced protein 78C	-	-	-	-	GO:0005634//nucleus	GO:0003700//transcription factor activity, sequence-specific DNA binding;GO:0008270//zinc ion binding;GO:0043565//sequence-specific DNA binding	GO:0045892//negative regulation of transcription, DNA-templated
MSTRG.34474.2	Sfur010151	0.98519569	1.28E-06	Eip78C	Ecdysone-induced protein 78C	-	-	-	-	GO:0005634//nucleus	GO:0003700//transcription factor activity, sequence-specific DNA binding;GO:0008270//zinc ion binding;GO:0043565//sequence-specific DNA binding	GO:0045892//negative regulation of transcription, DNA-templated
MSTRG.36079.1	Sfur010151	0.985947008	1.07E-06	Eip78C	Ecdysone-induced protein 78C	-	-	-	-	GO:0005634//nucleus	GO:0003700//transcription factor activity, sequence-specific DNA binding;GO:0008270//zinc ion binding;GO:0043565//sequence-specific DNA binding	GO:0045892//negative regulation of transcription, DNA-templated
MSTRG.36087.1	Sfur010151	0.995320726	2.30E-08	Eip78C	Ecdysone-induced protein 78C	-	-	-	-	GO:0005634//nucleus	GO:0003700//transcription factor activity, sequence-specific DNA binding;GO:0008270//zinc ion binding;GO:0043565//sequence-specific DNA binding	GO:0045892//negative regulation of transcription, DNA-templated
MSTRG.3731.1	Sfur010151	0.985266743	1.26E-06	Eip78C	Ecdysone-induced protein 78C	-	-	-	-	GO:0005634//nucleus	GO:0003700//transcription factor activity, sequence-specific DNA binding;GO:0008270//zinc ion binding;GO:0043565//sequence-specific DNA binding	GO:0045892//negative regulation of transcription, DNA-templated
MSTRG.38275.2	Sfur010151	0.986261393	9.87E-07	Eip78C	Ecdysone-induced protein 78C	-	-	-	-	GO:0005634//nucleus	GO:0003700//transcription factor activity, sequence-specific DNA binding;GO:0008270//zinc ion binding;GO:0043565//sequence-specific DNA binding	GO:0045892//negative regulation of transcription, DNA-templated
MSTRG.38291.5	Sfur010151	0.986089873	1.03E-06	Eip78C	Ecdysone-induced protein 78C	-	-	-	-	GO:0005634//nucleus	GO:0003700//transcription factor activity, sequence-specific DNA binding;GO:0008270//zinc ion binding;GO:0043565//sequence-specific DNA binding	GO:0045892//negative regulation of transcription, DNA-templated
MSTRG.39026.1	Sfur010151	0.990665922	2.56E-07	Eip78C	Ecdysone-induced protein 78C	-	-	-	-	GO:0005634//nucleus	GO:0003700//transcription factor activity, sequence-specific DNA binding;GO:0008270//zinc ion binding;GO:0043565//sequence-specific DNA binding	GO:0045892//negative regulation of transcription, DNA-templated
MSTRG.4917.1	Sfur010151	0.983373068	1.92E-06	Eip78C	Ecdysone-induced protein 78C	-	-	-	-	GO:0005634//nucleus	GO:0003700//transcription factor activity, sequence-specific DNA binding;GO:0008270//zinc ion binding;GO:0043565//sequence-specific DNA binding	GO:0045892//negative regulation of transcription, DNA-templated
MSTRG.6175.1	Sfur010151	0.98112401	2.99E-06	Eip78C	Ecdysone-induced protein 78C	-	-	-	-	GO:0005634//nucleus	GO:0003700//transcription factor activity, sequence-specific DNA binding;GO:0008270//zinc ion binding;GO:0043565//sequence-specific DNA binding	GO:0045892//negative regulation of transcription, DNA-templated
MSTRG.10562.1	Sfur012302	-0.988164613	5.87E-07	ELOVL7	Elongation of very long chain fatty acids protein 4	Metabolism;Metabolism;Metabolism;Metabolism	Global and overview maps;Global and overview maps;Lipid metabolism;Lipid metabolism	ko01100//Metabolic pathways;ko01212//Fatty acid metabolism;ko01040//Biosynthesis of unsaturated fatty acids;ko00062//Fatty acid elongation	K10250;K10250;K10250;K10250	GO:0005783//endoplasmic reticulum;GO:0030176//integral component of endoplasmic reticulum membrane	GO:0008020//G-protein coupled photoreceptor activity;GO:0009922//fatty acid elongase activity	GO:0006633//fatty acid biosynthetic process;GO:0006636//unsaturated fatty acid biosynthetic process;GO:0019367//fatty acid elongation, saturated fatty acid;GO:0030148//sphingolipid biosynthetic process;GO:0034625//fatty acid elongation, monounsaturated fatty acid;GO:0034626//fatty acid elongation, polyunsaturated fatty acid;GO:0035338//long-chain fatty-acyl-CoA biosynthetic process;GO:0042761//ve…
MSTRG.11199.1	Sfur012302	-0.992156554	1.40E-07	ELOVL7	Elongation of very long chain fatty acids protein 4	Metabolism;Metabolism;Metabolism;Metabolism	Global and overview maps;Global and overview maps;Lipid metabolism;Lipid metabolism	ko01100//Metabolic pathways;ko01212//Fatty acid metabolism;ko01040//Biosynthesis of unsaturated fatty acids;ko00062//Fatty acid elongation	K10250;K10250;K10250;K10250	GO:0005783//endoplasmic reticulum;GO:0030176//integral component of endoplasmic reticulum membrane	GO:0008020//G-protein coupled photoreceptor activity;GO:0009922//fatty acid elongase activity	GO:0006633//fatty acid biosynthetic process;GO:0006636//unsaturated fatty acid biosynthetic process;GO:0019367//fatty acid elongation, saturated fatty acid;GO:0030148//sphingolipid biosynthetic process;GO:0034625//fatty acid elongation, monounsaturated fatty acid;GO:0034626//fatty acid elongation, polyunsaturated fatty acid;GO:0035338//long-chain fatty-acyl-CoA biosynthetic process;GO:0042761//ve…
MSTRG.11349.1	Sfur012302	-0.985189318	1.28E-06	ELOVL7	Elongation of very long chain fatty acids protein 4	Metabolism;Metabolism;Metabolism;Metabolism	Global and overview maps;Global and overview maps;Lipid metabolism;Lipid metabolism	ko01100//Metabolic pathways;ko01212//Fatty acid metabolism;ko01040//Biosynthesis of unsaturated fatty acids;ko00062//Fatty acid elongation	K10250;K10250;K10250;K10250	GO:0005783//endoplasmic reticulum;GO:0030176//integral component of endoplasmic reticulum membrane	GO:0008020//G-protein coupled photoreceptor activity;GO:0009922//fatty acid elongase activity	GO:0006633//fatty acid biosynthetic process;GO:0006636//unsaturated fatty acid biosynthetic process;GO:0019367//fatty acid elongation, saturated fatty acid;GO:0030148//sphingolipid biosynthetic process;GO:0034625//fatty acid elongation, monounsaturated fatty acid;GO:0034626//fatty acid elongation, polyunsaturated fatty acid;GO:0035338//long-chain fatty-acyl-CoA biosynthetic process;GO:0042761//ve…
MSTRG.12968.2	Sfur012302	-0.987608191	6.89E-07	ELOVL7	Elongation of very long chain fatty acids protein 4	Metabolism;Metabolism;Metabolism;Metabolism	Global and overview maps;Global and overview maps;Lipid metabolism;Lipid metabolism	ko01100//Metabolic pathways;ko01212//Fatty acid metabolism;ko01040//Biosynthesis of unsaturated fatty acids;ko00062//Fatty acid elongation	K10250;K10250;K10250;K10250	GO:0005783//endoplasmic reticulum;GO:0030176//integral component of endoplasmic reticulum membrane	GO:0008020//G-protein coupled photoreceptor activity;GO:0009922//fatty acid elongase activity	GO:0006633//fatty acid biosynthetic process;GO:0006636//unsaturated fatty acid biosynthetic process;GO:0019367//fatty acid elongation, saturated fatty acid;GO:0030148//sphingolipid biosynthetic process;GO:0034625//fatty acid elongation, monounsaturated fatty acid;GO:0034626//fatty acid elongation, polyunsaturated fatty acid;GO:0035338//long-chain fatty-acyl-CoA biosynthetic process;GO:0042761//ve…
MSTRG.16086.1	Sfur012302	-0.98640294	9.52E-07	ELOVL7	Elongation of very long chain fatty acids protein 4	Metabolism;Metabolism;Metabolism;Metabolism	Global and overview maps;Global and overview maps;Lipid metabolism;Lipid metabolism	ko01100//Metabolic pathways;ko01212//Fatty acid metabolism;ko01040//Biosynthesis of unsaturated fatty acids;ko00062//Fatty acid elongation	K10250;K10250;K10250;K10250	GO:0005783//endoplasmic reticulum;GO:0030176//integral component of endoplasmic reticulum membrane	GO:0008020//G-protein coupled photoreceptor activity;GO:0009922//fatty acid elongase activity	GO:0006633//fatty acid biosynthetic process;GO:0006636//unsaturated fatty acid biosynthetic process;GO:0019367//fatty acid elongation, saturated fatty acid;GO:0030148//sphingolipid biosynthetic process;GO:0034625//fatty acid elongation, monounsaturated fatty acid;GO:0034626//fatty acid elongation, polyunsaturated fatty acid;GO:0035338//long-chain fatty-acyl-CoA biosynthetic process;GO:0042761//ve…
MSTRG.16087.1	Sfur012302	-0.989475462	3.90E-07	ELOVL7	Elongation of very long chain fatty acids protein 4	Metabolism;Metabolism;Metabolism;Metabolism	Global and overview maps;Global and overview maps;Lipid metabolism;Lipid metabolism	ko01100//Metabolic pathways;ko01212//Fatty acid metabolism;ko01040//Biosynthesis of unsaturated fatty acids;ko00062//Fatty acid elongation	K10250;K10250;K10250;K10250	GO:0005783//endoplasmic reticulum;GO:0030176//integral component of endoplasmic reticulum membrane	GO:0008020//G-protein coupled photoreceptor activity;GO:0009922//fatty acid elongase activity	GO:0006633//fatty acid biosynthetic process;GO:0006636//unsaturated fatty acid biosynthetic process;GO:0019367//fatty acid elongation, saturated fatty acid;GO:0030148//sphingolipid biosynthetic process;GO:0034625//fatty acid elongation, monounsaturated fatty acid;GO:0034626//fatty acid elongation, polyunsaturated fatty acid;GO:0035338//long-chain fatty-acyl-CoA biosynthetic process;GO:0042761//ve…
MSTRG.16908.1	Sfur012302	-0.980122397	3.58E-06	ELOVL7	Elongation of very long chain fatty acids protein 4	Metabolism;Metabolism;Metabolism;Metabolism	Global and overview maps;Global and overview maps;Lipid metabolism;Lipid metabolism	ko01100//Metabolic pathways;ko01212//Fatty acid metabolism;ko01040//Biosynthesis of unsaturated fatty acids;ko00062//Fatty acid elongation	K10250;K10250;K10250;K10250	GO:0005783//endoplasmic reticulum;GO:0030176//integral component of endoplasmic reticulum membrane	GO:0008020//G-protein coupled photoreceptor activity;GO:0009922//fatty acid elongase activity	GO:0006633//fatty acid biosynthetic process;GO:0006636//unsaturated fatty acid biosynthetic process;GO:0019367//fatty acid elongation, saturated fatty acid;GO:0030148//sphingolipid biosynthetic process;GO:0034625//fatty acid elongation, monounsaturated fatty acid;GO:0034626//fatty acid elongation, polyunsaturated fatty acid;GO:0035338//long-chain fatty-acyl-CoA biosynthetic process;GO:0042761//ve…
MSTRG.18635.5	Sfur012302	-0.994355947	4.42E-08	ELOVL7	Elongation of very long chain fatty acids protein 4	Metabolism;Metabolism;Metabolism;Metabolism	Global and overview maps;Global and overview maps;Lipid metabolism;Lipid metabolism	ko01100//Metabolic pathways;ko01212//Fatty acid metabolism;ko01040//Biosynthesis of unsaturated fatty acids;ko00062//Fatty acid elongation	K10250;K10250;K10250;K10250	GO:0005783//endoplasmic reticulum;GO:0030176//integral component of endoplasmic reticulum membrane	GO:0008020//G-protein coupled photoreceptor activity;GO:0009922//fatty acid elongase activity	GO:0006633//fatty acid biosynthetic process;GO:0006636//unsaturated fatty acid biosynthetic process;GO:0019367//fatty acid elongation, saturated fatty acid;GO:0030148//sphingolipid biosynthetic process;GO:0034625//fatty acid elongation, monounsaturated fatty acid;GO:0034626//fatty acid elongation, polyunsaturated fatty acid;GO:0035338//long-chain fatty-acyl-CoA biosynthetic process;GO:0042761//ve…
MSTRG.20058.1	Sfur012302	-0.986675358	8.88E-07	ELOVL7	Elongation of very long chain fatty acids protein 4	Metabolism;Metabolism;Metabolism;Metabolism	Global and overview maps;Global and overview maps;Lipid metabolism;Lipid metabolism	ko01100//Metabolic pathways;ko01212//Fatty acid metabolism;ko01040//Biosynthesis of unsaturated fatty acids;ko00062//Fatty acid elongation	K10250;K10250;K10250;K10250	GO:0005783//endoplasmic reticulum;GO:0030176//integral component of endoplasmic reticulum membrane	GO:0008020//G-protein coupled photoreceptor activity;GO:0009922//fatty acid elongase activity	GO:0006633//fatty acid biosynthetic process;GO:0006636//unsaturated fatty acid biosynthetic process;GO:0019367//fatty acid elongation, saturated fatty acid;GO:0030148//sphingolipid biosynthetic process;GO:0034625//fatty acid elongation, monounsaturated fatty acid;GO:0034626//fatty acid elongation, polyunsaturated fatty acid;GO:0035338//long-chain fatty-acyl-CoA biosynthetic process;GO:0042761//ve…
MSTRG.22908.1	Sfur012302	-0.990700264	2.53E-07	ELOVL7	Elongation of very long chain fatty acids protein 4	Metabolism;Metabolism;Metabolism;Metabolism	Global and overview maps;Global and overview maps;Lipid metabolism;Lipid metabolism	ko01100//Metabolic pathways;ko01212//Fatty acid metabolism;ko01040//Biosynthesis of unsaturated fatty acids;ko00062//Fatty acid elongation	K10250;K10250;K10250;K10250	GO:0005783//endoplasmic reticulum;GO:0030176//integral component of endoplasmic reticulum membrane	GO:0008020//G-protein coupled photoreceptor activity;GO:0009922//fatty acid elongase activity	GO:0006633//fatty acid biosynthetic process;GO:0006636//unsaturated fatty acid biosynthetic process;GO:0019367//fatty acid elongation, saturated fatty acid;GO:0030148//sphingolipid biosynthetic process;GO:0034625//fatty acid elongation, monounsaturated fatty acid;GO:0034626//fatty acid elongation, polyunsaturated fatty acid;GO:0035338//long-chain fatty-acyl-CoA biosynthetic process;GO:0042761//ve…
MSTRG.23212.1	Sfur012302	0.985234114	1.27E-06	ELOVL7	Elongation of very long chain fatty acids protein 4	Metabolism;Metabolism;Metabolism;Metabolism	Global and overview maps;Global and overview maps;Lipid metabolism;Lipid metabolism	ko01100//Metabolic pathways;ko01212//Fatty acid metabolism;ko01040//Biosynthesis of unsaturated fatty acids;ko00062//Fatty acid elongation	K10250;K10250;K10250;K10250	GO:0005783//endoplasmic reticulum;GO:0030176//integral component of endoplasmic reticulum membrane	GO:0008020//G-protein coupled photoreceptor activity;GO:0009922//fatty acid elongase activity	GO:0006633//fatty acid biosynthetic process;GO:0006636//unsaturated fatty acid biosynthetic process;GO:0019367//fatty acid elongation, saturated fatty acid;GO:0030148//sphingolipid biosynthetic process;GO:0034625//fatty acid elongation, monounsaturated fatty acid;GO:0034626//fatty acid elongation, polyunsaturated fatty acid;GO:0035338//long-chain fatty-acyl-CoA biosynthetic process;GO:0042761//ve…
MSTRG.2447.1	Sfur012302	-0.989524354	3.83E-07	ELOVL7	Elongation of very long chain fatty acids protein 4	Metabolism;Metabolism;Metabolism;Metabolism	Global and overview maps;Global and overview maps;Lipid metabolism;Lipid metabolism	ko01100//Metabolic pathways;ko01212//Fatty acid metabolism;ko01040//Biosynthesis of unsaturated fatty acids;ko00062//Fatty acid elongation	K10250;K10250;K10250;K10250	GO:0005783//endoplasmic reticulum;GO:0030176//integral component of endoplasmic reticulum membrane	GO:0008020//G-protein coupled photoreceptor activity;GO:0009922//fatty acid elongase activity	GO:0006633//fatty acid biosynthetic process;GO:0006636//unsaturated fatty acid biosynthetic process;GO:0019367//fatty acid elongation, saturated fatty acid;GO:0030148//sphingolipid biosynthetic process;GO:0034625//fatty acid elongation, monounsaturated fatty acid;GO:0034626//fatty acid elongation, polyunsaturated fatty acid;GO:0035338//long-chain fatty-acyl-CoA biosynthetic process;GO:0042761//ve…
MSTRG.25578.1	Sfur012302	-0.982196085	2.44E-06	ELOVL7	Elongation of very long chain fatty acids protein 4	Metabolism;Metabolism;Metabolism;Metabolism	Global and overview maps;Global and overview maps;Lipid metabolism;Lipid metabolism	ko01100//Metabolic pathways;ko01212//Fatty acid metabolism;ko01040//Biosynthesis of unsaturated fatty acids;ko00062//Fatty acid elongation	K10250;K10250;K10250;K10250	GO:0005783//endoplasmic reticulum;GO:0030176//integral component of endoplasmic reticulum membrane	GO:0008020//G-protein coupled photoreceptor activity;GO:0009922//fatty acid elongase activity	GO:0006633//fatty acid biosynthetic process;GO:0006636//unsaturated fatty acid biosynthetic process;GO:0019367//fatty acid elongation, saturated fatty acid;GO:0030148//sphingolipid biosynthetic process;GO:0034625//fatty acid elongation, monounsaturated fatty acid;GO:0034626//fatty acid elongation, polyunsaturated fatty acid;GO:0035338//long-chain fatty-acyl-CoA biosynthetic process;GO:0042761//ve…
MSTRG.25629.14	Sfur012302	-0.984609887	1.47E-06	ELOVL7	Elongation of very long chain fatty acids protein 4	Metabolism;Metabolism;Metabolism;Metabolism	Global and overview maps;Global and overview maps;Lipid metabolism;Lipid metabolism	ko01100//Metabolic pathways;ko01212//Fatty acid metabolism;ko01040//Biosynthesis of unsaturated fatty acids;ko00062//Fatty acid elongation	K10250;K10250;K10250;K10250	GO:0005783//endoplasmic reticulum;GO:0030176//integral component of endoplasmic reticulum membrane	GO:0008020//G-protein coupled photoreceptor activity;GO:0009922//fatty acid elongase activity	GO:0006633//fatty acid biosynthetic process;GO:0006636//unsaturated fatty acid biosynthetic process;GO:0019367//fatty acid elongation, saturated fatty acid;GO:0030148//sphingolipid biosynthetic process;GO:0034625//fatty acid elongation, monounsaturated fatty acid;GO:0034626//fatty acid elongation, polyunsaturated fatty acid;GO:0035338//long-chain fatty-acyl-CoA biosynthetic process;GO:0042761//ve…
MSTRG.25634.1	Sfur012302	-0.980404721	3.40E-06	ELOVL7	Elongation of very long chain fatty acids protein 4	Metabolism;Metabolism;Metabolism;Metabolism	Global and overview maps;Global and overview maps;Lipid metabolism;Lipid metabolism	ko01100//Metabolic pathways;ko01212//Fatty acid metabolism;ko01040//Biosynthesis of unsaturated fatty acids;ko00062//Fatty acid elongation	K10250;K10250;K10250;K10250	GO:0005783//endoplasmic reticulum;GO:0030176//integral component of endoplasmic reticulum membrane	GO:0008020//G-protein coupled photoreceptor activity;GO:0009922//fatty acid elongase activity	GO:0006633//fatty acid biosynthetic process;GO:0006636//unsaturated fatty acid biosynthetic process;GO:0019367//fatty acid elongation, saturated fatty acid;GO:0030148//sphingolipid biosynthetic process;GO:0034625//fatty acid elongation, monounsaturated fatty acid;GO:0034626//fatty acid elongation, polyunsaturated fatty acid;GO:0035338//long-chain fatty-acyl-CoA biosynthetic process;GO:0042761//ve…
MSTRG.27226.1	Sfur012302	-0.982692509	2.21E-06	ELOVL7	Elongation of very long chain fatty acids protein 4	Metabolism;Metabolism;Metabolism;Metabolism	Global and overview maps;Global and overview maps;Lipid metabolism;Lipid metabolism	ko01100//Metabolic pathways;ko01212//Fatty acid metabolism;ko01040//Biosynthesis of unsaturated fatty acids;ko00062//Fatty acid elongation	K10250;K10250;K10250;K10250	GO:0005783//endoplasmic reticulum;GO:0030176//integral component of endoplasmic reticulum membrane	GO:0008020//G-protein coupled photoreceptor activity;GO:0009922//fatty acid elongase activity	GO:0006633//fatty acid biosynthetic process;GO:0006636//unsaturated fatty acid biosynthetic process;GO:0019367//fatty acid elongation, saturated fatty acid;GO:0030148//sphingolipid biosynthetic process;GO:0034625//fatty acid elongation, monounsaturated fatty acid;GO:0034626//fatty acid elongation, polyunsaturated fatty acid;GO:0035338//long-chain fatty-acyl-CoA biosynthetic process;GO:0042761//ve…
MSTRG.27823.1	Sfur012302	-0.980203334	3.53E-06	ELOVL7	Elongation of very long chain fatty acids protein 4	Metabolism;Metabolism;Metabolism;Metabolism	Global and overview maps;Global and overview maps;Lipid metabolism;Lipid metabolism	ko01100//Metabolic pathways;ko01212//Fatty acid metabolism;ko01040//Biosynthesis of unsaturated fatty acids;ko00062//Fatty acid elongation	K10250;K10250;K10250;K10250	GO:0005783//endoplasmic reticulum;GO:0030176//integral component of endoplasmic reticulum membrane	GO:0008020//G-protein coupled photoreceptor activity;GO:0009922//fatty acid elongase activity	GO:0006633//fatty acid biosynthetic process;GO:0006636//unsaturated fatty acid biosynthetic process;GO:0019367//fatty acid elongation, saturated fatty acid;GO:0030148//sphingolipid biosynthetic process;GO:0034625//fatty acid elongation, monounsaturated fatty acid;GO:0034626//fatty acid elongation, polyunsaturated fatty acid;GO:0035338//long-chain fatty-acyl-CoA biosynthetic process;GO:0042761//ve…
MSTRG.28253.4	Sfur012302	-0.981658172	2.70E-06	ELOVL7	Elongation of very long chain fatty acids protein 4	Metabolism;Metabolism;Metabolism;Metabolism	Global and overview maps;Global and overview maps;Lipid metabolism;Lipid metabolism	ko01100//Metabolic pathways;ko01212//Fatty acid metabolism;ko01040//Biosynthesis of unsaturated fatty acids;ko00062//Fatty acid elongation	K10250;K10250;K10250;K10250	GO:0005783//endoplasmic reticulum;GO:0030176//integral component of endoplasmic reticulum membrane	GO:0008020//G-protein coupled photoreceptor activity;GO:0009922//fatty acid elongase activity	GO:0006633//fatty acid biosynthetic process;GO:0006636//unsaturated fatty acid biosynthetic process;GO:0019367//fatty acid elongation, saturated fatty acid;GO:0030148//sphingolipid biosynthetic process;GO:0034625//fatty acid elongation, monounsaturated fatty acid;GO:0034626//fatty acid elongation, polyunsaturated fatty acid;GO:0035338//long-chain fatty-acyl-CoA biosynthetic process;GO:0042761//ve…
MSTRG.29822.3	Sfur012302	-0.989527289	3.83E-07	ELOVL7	Elongation of very long chain fatty acids protein 4	Metabolism;Metabolism;Metabolism;Metabolism	Global and overview maps;Global and overview maps;Lipid metabolism;Lipid metabolism	ko01100//Metabolic pathways;ko01212//Fatty acid metabolism;ko01040//Biosynthesis of unsaturated fatty acids;ko00062//Fatty acid elongation	K10250;K10250;K10250;K10250	GO:0005783//endoplasmic reticulum;GO:0030176//integral component of endoplasmic reticulum membrane	GO:0008020//G-protein coupled photoreceptor activity;GO:0009922//fatty acid elongase activity	GO:0006633//fatty acid biosynthetic process;GO:0006636//unsaturated fatty acid biosynthetic process;GO:0019367//fatty acid elongation, saturated fatty acid;GO:0030148//sphingolipid biosynthetic process;GO:0034625//fatty acid elongation, monounsaturated fatty acid;GO:0034626//fatty acid elongation, polyunsaturated fatty acid;GO:0035338//long-chain fatty-acyl-CoA biosynthetic process;GO:0042761//ve…
MSTRG.30274.1	Sfur012302	-0.987245852	7.62E-07	ELOVL7	Elongation of very long chain fatty acids protein 4	Metabolism;Metabolism;Metabolism;Metabolism	Global and overview maps;Global and overview maps;Lipid metabolism;Lipid metabolism	ko01100//Metabolic pathways;ko01212//Fatty acid metabolism;ko01040//Biosynthesis of unsaturated fatty acids;ko00062//Fatty acid elongation	K10250;K10250;K10250;K10250	GO:0005783//endoplasmic reticulum;GO:0030176//integral component of endoplasmic reticulum membrane	GO:0008020//G-protein coupled photoreceptor activity;GO:0009922//fatty acid elongase activity	GO:0006633//fatty acid biosynthetic process;GO:0006636//unsaturated fatty acid biosynthetic process;GO:0019367//fatty acid elongation, saturated fatty acid;GO:0030148//sphingolipid biosynthetic process;GO:0034625//fatty acid elongation, monounsaturated fatty acid;GO:0034626//fatty acid elongation, polyunsaturated fatty acid;GO:0035338//long-chain fatty-acyl-CoA biosynthetic process;GO:0042761//ve…
MSTRG.3054.1	Sfur012302	-0.981250928	2.92E-06	ELOVL7	Elongation of very long chain fatty acids protein 4	Metabolism;Metabolism;Metabolism;Metabolism	Global and overview maps;Global and overview maps;Lipid metabolism;Lipid metabolism	ko01100//Metabolic pathways;ko01212//Fatty acid metabolism;ko01040//Biosynthesis of unsaturated fatty acids;ko00062//Fatty acid elongation	K10250;K10250;K10250;K10250	GO:0005783//endoplasmic reticulum;GO:0030176//integral component of endoplasmic reticulum membrane	GO:0008020//G-protein coupled photoreceptor activity;GO:0009922//fatty acid elongase activity	GO:0006633//fatty acid biosynthetic process;GO:0006636//unsaturated fatty acid biosynthetic process;GO:0019367//fatty acid elongation, saturated fatty acid;GO:0030148//sphingolipid biosynthetic process;GO:0034625//fatty acid elongation, monounsaturated fatty acid;GO:0034626//fatty acid elongation, polyunsaturated fatty acid;GO:0035338//long-chain fatty-acyl-CoA biosynthetic process;GO:0042761//ve…
MSTRG.32766.1	Sfur012302	-0.988590728	5.17E-07	ELOVL7	Elongation of very long chain fatty acids protein 4	Metabolism;Metabolism;Metabolism;Metabolism	Global and overview maps;Global and overview maps;Lipid metabolism;Lipid metabolism	ko01100//Metabolic pathways;ko01212//Fatty acid metabolism;ko01040//Biosynthesis of unsaturated fatty acids;ko00062//Fatty acid elongation	K10250;K10250;K10250;K10250	GO:0005783//endoplasmic reticulum;GO:0030176//integral component of endoplasmic reticulum membrane	GO:0008020//G-protein coupled photoreceptor activity;GO:0009922//fatty acid elongase activity	GO:0006633//fatty acid biosynthetic process;GO:0006636//unsaturated fatty acid biosynthetic process;GO:0019367//fatty acid elongation, saturated fatty acid;GO:0030148//sphingolipid biosynthetic process;GO:0034625//fatty acid elongation, monounsaturated fatty acid;GO:0034626//fatty acid elongation, polyunsaturated fatty acid;GO:0035338//long-chain fatty-acyl-CoA biosynthetic process;GO:0042761//ve…
MSTRG.32768.1	Sfur012302	-0.983424743	1.90E-06	ELOVL7	Elongation of very long chain fatty acids protein 4	Metabolism;Metabolism;Metabolism;Metabolism	Global and overview maps;Global and overview maps;Lipid metabolism;Lipid metabolism	ko01100//Metabolic pathways;ko01212//Fatty acid metabolism;ko01040//Biosynthesis of unsaturated fatty acids;ko00062//Fatty acid elongation	K10250;K10250;K10250;K10250	GO:0005783//endoplasmic reticulum;GO:0030176//integral component of endoplasmic reticulum membrane	GO:0008020//G-protein coupled photoreceptor activity;GO:0009922//fatty acid elongase activity	GO:0006633//fatty acid biosynthetic process;GO:0006636//unsaturated fatty acid biosynthetic process;GO:0019367//fatty acid elongation, saturated fatty acid;GO:0030148//sphingolipid biosynthetic process;GO:0034625//fatty acid elongation, monounsaturated fatty acid;GO:0034626//fatty acid elongation, polyunsaturated fatty acid;GO:0035338//long-chain fatty-acyl-CoA biosynthetic process;GO:0042761//ve…
MSTRG.33771.1	Sfur012302	-0.985975379	1.06E-06	ELOVL7	Elongation of very long chain fatty acids protein 4	Metabolism;Metabolism;Metabolism;Metabolism	Global and overview maps;Global and overview maps;Lipid metabolism;Lipid metabolism	ko01100//Metabolic pathways;ko01212//Fatty acid metabolism;ko01040//Biosynthesis of unsaturated fatty acids;ko00062//Fatty acid elongation	K10250;K10250;K10250;K10250	GO:0005783//endoplasmic reticulum;GO:0030176//integral component of endoplasmic reticulum membrane	GO:0008020//G-protein coupled photoreceptor activity;GO:0009922//fatty acid elongase activity	GO:0006633//fatty acid biosynthetic process;GO:0006636//unsaturated fatty acid biosynthetic process;GO:0019367//fatty acid elongation, saturated fatty acid;GO:0030148//sphingolipid biosynthetic process;GO:0034625//fatty acid elongation, monounsaturated fatty acid;GO:0034626//fatty acid elongation, polyunsaturated fatty acid;GO:0035338//long-chain fatty-acyl-CoA biosynthetic process;GO:0042761//ve…
MSTRG.33773.1	Sfur012302	-0.98386174	1.73E-06	ELOVL7	Elongation of very long chain fatty acids protein 4	Metabolism;Metabolism;Metabolism;Metabolism	Global and overview maps;Global and overview maps;Lipid metabolism;Lipid metabolism	ko01100//Metabolic pathways;ko01212//Fatty acid metabolism;ko01040//Biosynthesis of unsaturated fatty acids;ko00062//Fatty acid elongation	K10250;K10250;K10250;K10250	GO:0005783//endoplasmic reticulum;GO:0030176//integral component of endoplasmic reticulum membrane	GO:0008020//G-protein coupled photoreceptor activity;GO:0009922//fatty acid elongase activity	GO:0006633//fatty acid biosynthetic process;GO:0006636//unsaturated fatty acid biosynthetic process;GO:0019367//fatty acid elongation, saturated fatty acid;GO:0030148//sphingolipid biosynthetic process;GO:0034625//fatty acid elongation, monounsaturated fatty acid;GO:0034626//fatty acid elongation, polyunsaturated fatty acid;GO:0035338//long-chain fatty-acyl-CoA biosynthetic process;GO:0042761//ve…
MSTRG.33855.2	Sfur012302	-0.985173339	1.29E-06	ELOVL7	Elongation of very long chain fatty acids protein 4	Metabolism;Metabolism;Metabolism;Metabolism	Global and overview maps;Global and overview maps;Lipid metabolism;Lipid metabolism	ko01100//Metabolic pathways;ko01212//Fatty acid metabolism;ko01040//Biosynthesis of unsaturated fatty acids;ko00062//Fatty acid elongation	K10250;K10250;K10250;K10250	GO:0005783//endoplasmic reticulum;GO:0030176//integral component of endoplasmic reticulum membrane	GO:0008020//G-protein coupled photoreceptor activity;GO:0009922//fatty acid elongase activity	GO:0006633//fatty acid biosynthetic process;GO:0006636//unsaturated fatty acid biosynthetic process;GO:0019367//fatty acid elongation, saturated fatty acid;GO:0030148//sphingolipid biosynthetic process;GO:0034625//fatty acid elongation, monounsaturated fatty acid;GO:0034626//fatty acid elongation, polyunsaturated fatty acid;GO:0035338//long-chain fatty-acyl-CoA biosynthetic process;GO:0042761//ve…
MSTRG.34473.3	Sfur012302	-0.982517713	2.29E-06	ELOVL7	Elongation of very long chain fatty acids protein 4	Metabolism;Metabolism;Metabolism;Metabolism	Global and overview maps;Global and overview maps;Lipid metabolism;Lipid metabolism	ko01100//Metabolic pathways;ko01212//Fatty acid metabolism;ko01040//Biosynthesis of unsaturated fatty acids;ko00062//Fatty acid elongation	K10250;K10250;K10250;K10250	GO:0005783//endoplasmic reticulum;GO:0030176//integral component of endoplasmic reticulum membrane	GO:0008020//G-protein coupled photoreceptor activity;GO:0009922//fatty acid elongase activity	GO:0006633//fatty acid biosynthetic process;GO:0006636//unsaturated fatty acid biosynthetic process;GO:0019367//fatty acid elongation, saturated fatty acid;GO:0030148//sphingolipid biosynthetic process;GO:0034625//fatty acid elongation, monounsaturated fatty acid;GO:0034626//fatty acid elongation, polyunsaturated fatty acid;GO:0035338//long-chain fatty-acyl-CoA biosynthetic process;GO:0042761//ve…
MSTRG.34474.2	Sfur012302	-0.987234515	7.64E-07	ELOVL7	Elongation of very long chain fatty acids protein 4	Metabolism;Metabolism;Metabolism;Metabolism	Global and overview maps;Global and overview maps;Lipid metabolism;Lipid metabolism	ko01100//Metabolic pathways;ko01212//Fatty acid metabolism;ko01040//Biosynthesis of unsaturated fatty acids;ko00062//Fatty acid elongation	K10250;K10250;K10250;K10250	GO:0005783//endoplasmic reticulum;GO:0030176//integral component of endoplasmic reticulum membrane	GO:0008020//G-protein coupled photoreceptor activity;GO:0009922//fatty acid elongase activity	GO:0006633//fatty acid biosynthetic process;GO:0006636//unsaturated fatty acid biosynthetic process;GO:0019367//fatty acid elongation, saturated fatty acid;GO:0030148//sphingolipid biosynthetic process;GO:0034625//fatty acid elongation, monounsaturated fatty acid;GO:0034626//fatty acid elongation, polyunsaturated fatty acid;GO:0035338//long-chain fatty-acyl-CoA biosynthetic process;GO:0042761//ve…
MSTRG.36079.1	Sfur012302	-0.98727462	7.56E-07	ELOVL7	Elongation of very long chain fatty acids protein 4	Metabolism;Metabolism;Metabolism;Metabolism	Global and overview maps;Global and overview maps;Lipid metabolism;Lipid metabolism	ko01100//Metabolic pathways;ko01212//Fatty acid metabolism;ko01040//Biosynthesis of unsaturated fatty acids;ko00062//Fatty acid elongation	K10250;K10250;K10250;K10250	GO:0005783//endoplasmic reticulum;GO:0030176//integral component of endoplasmic reticulum membrane	GO:0008020//G-protein coupled photoreceptor activity;GO:0009922//fatty acid elongase activity	GO:0006633//fatty acid biosynthetic process;GO:0006636//unsaturated fatty acid biosynthetic process;GO:0019367//fatty acid elongation, saturated fatty acid;GO:0030148//sphingolipid biosynthetic process;GO:0034625//fatty acid elongation, monounsaturated fatty acid;GO:0034626//fatty acid elongation, polyunsaturated fatty acid;GO:0035338//long-chain fatty-acyl-CoA biosynthetic process;GO:0042761//ve…
MSTRG.36087.1	Sfur012302	-0.98200257	2.53E-06	ELOVL7	Elongation of very long chain fatty acids protein 4	Metabolism;Metabolism;Metabolism;Metabolism	Global and overview maps;Global and overview maps;Lipid metabolism;Lipid metabolism	ko01100//Metabolic pathways;ko01212//Fatty acid metabolism;ko01040//Biosynthesis of unsaturated fatty acids;ko00062//Fatty acid elongation	K10250;K10250;K10250;K10250	GO:0005783//endoplasmic reticulum;GO:0030176//integral component of endoplasmic reticulum membrane	GO:0008020//G-protein coupled photoreceptor activity;GO:0009922//fatty acid elongase activity	GO:0006633//fatty acid biosynthetic process;GO:0006636//unsaturated fatty acid biosynthetic process;GO:0019367//fatty acid elongation, saturated fatty acid;GO:0030148//sphingolipid biosynthetic process;GO:0034625//fatty acid elongation, monounsaturated fatty acid;GO:0034626//fatty acid elongation, polyunsaturated fatty acid;GO:0035338//long-chain fatty-acyl-CoA biosynthetic process;GO:0042761//ve…
MSTRG.38291.5	Sfur012302	-0.991003646	2.25E-07	ELOVL7	Elongation of very long chain fatty acids protein 4	Metabolism;Metabolism;Metabolism;Metabolism	Global and overview maps;Global and overview maps;Lipid metabolism;Lipid metabolism	ko01100//Metabolic pathways;ko01212//Fatty acid metabolism;ko01040//Biosynthesis of unsaturated fatty acids;ko00062//Fatty acid elongation	K10250;K10250;K10250;K10250	GO:0005783//endoplasmic reticulum;GO:0030176//integral component of endoplasmic reticulum membrane	GO:0008020//G-protein coupled photoreceptor activity;GO:0009922//fatty acid elongase activity	GO:0006633//fatty acid biosynthetic process;GO:0006636//unsaturated fatty acid biosynthetic process;GO:0019367//fatty acid elongation, saturated fatty acid;GO:0030148//sphingolipid biosynthetic process;GO:0034625//fatty acid elongation, monounsaturated fatty acid;GO:0034626//fatty acid elongation, polyunsaturated fatty acid;GO:0035338//long-chain fatty-acyl-CoA biosynthetic process;GO:0042761//ve…
MSTRG.39026.1	Sfur012302	-0.980230032	3.51E-06	ELOVL7	Elongation of very long chain fatty acids protein 4	Metabolism;Metabolism;Metabolism;Metabolism	Global and overview maps;Global and overview maps;Lipid metabolism;Lipid metabolism	ko01100//Metabolic pathways;ko01212//Fatty acid metabolism;ko01040//Biosynthesis of unsaturated fatty acids;ko00062//Fatty acid elongation	K10250;K10250;K10250;K10250	GO:0005783//endoplasmic reticulum;GO:0030176//integral component of endoplasmic reticulum membrane	GO:0008020//G-protein coupled photoreceptor activity;GO:0009922//fatty acid elongase activity	GO:0006633//fatty acid biosynthetic process;GO:0006636//unsaturated fatty acid biosynthetic process;GO:0019367//fatty acid elongation, saturated fatty acid;GO:0030148//sphingolipid biosynthetic process;GO:0034625//fatty acid elongation, monounsaturated fatty acid;GO:0034626//fatty acid elongation, polyunsaturated fatty acid;GO:0035338//long-chain fatty-acyl-CoA biosynthetic process;GO:0042761//ve…
MSTRG.39215.1	Sfur012302	-0.98439321	1.54E-06	ELOVL7	Elongation of very long chain fatty acids protein 4	Metabolism;Metabolism;Metabolism;Metabolism	Global and overview maps;Global and overview maps;Lipid metabolism;Lipid metabolism	ko01100//Metabolic pathways;ko01212//Fatty acid metabolism;ko01040//Biosynthesis of unsaturated fatty acids;ko00062//Fatty acid elongation	K10250;K10250;K10250;K10250	GO:0005783//endoplasmic reticulum;GO:0030176//integral component of endoplasmic reticulum membrane	GO:0008020//G-protein coupled photoreceptor activity;GO:0009922//fatty acid elongase activity	GO:0006633//fatty acid biosynthetic process;GO:0006636//unsaturated fatty acid biosynthetic process;GO:0019367//fatty acid elongation, saturated fatty acid;GO:0030148//sphingolipid biosynthetic process;GO:0034625//fatty acid elongation, monounsaturated fatty acid;GO:0034626//fatty acid elongation, polyunsaturated fatty acid;GO:0035338//long-chain fatty-acyl-CoA biosynthetic process;GO:0042761//ve…
MSTRG.39924.1	Sfur012302	-0.982265684	2.40E-06	ELOVL7	Elongation of very long chain fatty acids protein 4	Metabolism;Metabolism;Metabolism;Metabolism	Global and overview maps;Global and overview maps;Lipid metabolism;Lipid metabolism	ko01100//Metabolic pathways;ko01212//Fatty acid metabolism;ko01040//Biosynthesis of unsaturated fatty acids;ko00062//Fatty acid elongation	K10250;K10250;K10250;K10250	GO:0005783//endoplasmic reticulum;GO:0030176//integral component of endoplasmic reticulum membrane	GO:0008020//G-protein coupled photoreceptor activity;GO:0009922//fatty acid elongase activity	GO:0006633//fatty acid biosynthetic process;GO:0006636//unsaturated fatty acid biosynthetic process;GO:0019367//fatty acid elongation, saturated fatty acid;GO:0030148//sphingolipid biosynthetic process;GO:0034625//fatty acid elongation, monounsaturated fatty acid;GO:0034626//fatty acid elongation, polyunsaturated fatty acid;GO:0035338//long-chain fatty-acyl-CoA biosynthetic process;GO:0042761//ve…
MSTRG.6175.1	Sfur012302	-0.981891066	2.59E-06	ELOVL7	Elongation of very long chain fatty acids protein 4	Metabolism;Metabolism;Metabolism;Metabolism	Global and overview maps;Global and overview maps;Lipid metabolism;Lipid metabolism	ko01100//Metabolic pathways;ko01212//Fatty acid metabolism;ko01040//Biosynthesis of unsaturated fatty acids;ko00062//Fatty acid elongation	K10250;K10250;K10250;K10250	GO:0005783//endoplasmic reticulum;GO:0030176//integral component of endoplasmic reticulum membrane	GO:0008020//G-protein coupled photoreceptor activity;GO:0009922//fatty acid elongase activity	GO:0006633//fatty acid biosynthetic process;GO:0006636//unsaturated fatty acid biosynthetic process;GO:0019367//fatty acid elongation, saturated fatty acid;GO:0030148//sphingolipid biosynthetic process;GO:0034625//fatty acid elongation, monounsaturated fatty acid;GO:0034626//fatty acid elongation, polyunsaturated fatty acid;GO:0035338//long-chain fatty-acyl-CoA biosynthetic process;GO:0042761//ve…
MSTRG.8295.1	Sfur012302	-0.982534662	2.28E-06	ELOVL7	Elongation of very long chain fatty acids protein 4	Metabolism;Metabolism;Metabolism;Metabolism	Global and overview maps;Global and overview maps;Lipid metabolism;Lipid metabolism	ko01100//Metabolic pathways;ko01212//Fatty acid metabolism;ko01040//Biosynthesis of unsaturated fatty acids;ko00062//Fatty acid elongation	K10250;K10250;K10250;K10250	GO:0005783//endoplasmic reticulum;GO:0030176//integral component of endoplasmic reticulum membrane	GO:0008020//G-protein coupled photoreceptor activity;GO:0009922//fatty acid elongase activity	GO:0006633//fatty acid biosynthetic process;GO:0006636//unsaturated fatty acid biosynthetic process;GO:0019367//fatty acid elongation, saturated fatty acid;GO:0030148//sphingolipid biosynthetic process;GO:0034625//fatty acid elongation, monounsaturated fatty acid;GO:0034626//fatty acid elongation, polyunsaturated fatty acid;GO:0035338//long-chain fatty-acyl-CoA biosynthetic process;GO:0042761//ve…
MSTRG.8569.4	Sfur012302	-0.991356214	1.96E-07	ELOVL7	Elongation of very long chain fatty acids protein 4	Metabolism;Metabolism;Metabolism;Metabolism	Global and overview maps;Global and overview maps;Lipid metabolism;Lipid metabolism	ko01100//Metabolic pathways;ko01212//Fatty acid metabolism;ko01040//Biosynthesis of unsaturated fatty acids;ko00062//Fatty acid elongation	K10250;K10250;K10250;K10250	GO:0005783//endoplasmic reticulum;GO:0030176//integral component of endoplasmic reticulum membrane	GO:0008020//G-protein coupled photoreceptor activity;GO:0009922//fatty acid elongase activity	GO:0006633//fatty acid biosynthetic process;GO:0006636//unsaturated fatty acid biosynthetic process;GO:0019367//fatty acid elongation, saturated fatty acid;GO:0030148//sphingolipid biosynthetic process;GO:0034625//fatty acid elongation, monounsaturated fatty acid;GO:0034626//fatty acid elongation, polyunsaturated fatty acid;GO:0035338//long-chain fatty-acyl-CoA biosynthetic process;GO:0042761//ve…
MSTRG.9698.2	Sfur012302	0.983394308	1.91E-06	ELOVL7	Elongation of very long chain fatty acids protein 4	Metabolism;Metabolism;Metabolism;Metabolism	Global and overview maps;Global and overview maps;Lipid metabolism;Lipid metabolism	ko01100//Metabolic pathways;ko01212//Fatty acid metabolism;ko01040//Biosynthesis of unsaturated fatty acids;ko00062//Fatty acid elongation	K10250;K10250;K10250;K10250	GO:0005783//endoplasmic reticulum;GO:0030176//integral component of endoplasmic reticulum membrane	GO:0008020//G-protein coupled photoreceptor activity;GO:0009922//fatty acid elongase activity	GO:0006633//fatty acid biosynthetic process;GO:0006636//unsaturated fatty acid biosynthetic process;GO:0019367//fatty acid elongation, saturated fatty acid;GO:0030148//sphingolipid biosynthetic process;GO:0034625//fatty acid elongation, monounsaturated fatty acid;GO:0034626//fatty acid elongation, polyunsaturated fatty acid;GO:0035338//long-chain fatty-acyl-CoA biosynthetic process;GO:0042761//ve…
MSTRG.10391.1	Sfur013893	0.984334545	1.56E-06	PGM3	Phosphoacetylglucosamine mutase	Metabolism;Metabolism	Global and overview maps;Carbohydrate metabolism	ko01100//Metabolic pathways;ko00520//Amino sugar and nucleotide sugar metabolism	K01836;K01836	GO:0005829//cytosol	GO:0000287//magnesium ion binding;GO:0004610//phosphoacetylglucosamine mutase activity;GO:0004614//phosphoglucomutase activity	GO:0005975//carbohydrate metabolic process;GO:0006041//glucosamine metabolic process;GO:0006048//UDP-N-acetylglucosamine biosynthetic process;GO:0006487//protein N-linked glycosylation;GO:0006493//protein O-linked glycosylation;GO:0007283//spermatogenesis;GO:0019255//glucose 1-phosphate metabolic process;GO:0030097//hemopoiesis
MSTRG.10562.1	Sfur013893	0.984829735	1.40E-06	PGM3	Phosphoacetylglucosamine mutase	Metabolism;Metabolism	Global and overview maps;Carbohydrate metabolism	ko01100//Metabolic pathways;ko00520//Amino sugar and nucleotide sugar metabolism	K01836;K01836	GO:0005829//cytosol	GO:0000287//magnesium ion binding;GO:0004610//phosphoacetylglucosamine mutase activity;GO:0004614//phosphoglucomutase activity	GO:0005975//carbohydrate metabolic process;GO:0006041//glucosamine metabolic process;GO:0006048//UDP-N-acetylglucosamine biosynthetic process;GO:0006487//protein N-linked glycosylation;GO:0006493//protein O-linked glycosylation;GO:0007283//spermatogenesis;GO:0019255//glucose 1-phosphate metabolic process;GO:0030097//hemopoiesis
MSTRG.11199.1	Sfur013893	0.987963913	6.23E-07	PGM3	Phosphoacetylglucosamine mutase	Metabolism;Metabolism	Global and overview maps;Carbohydrate metabolism	ko01100//Metabolic pathways;ko00520//Amino sugar and nucleotide sugar metabolism	K01836;K01836	GO:0005829//cytosol	GO:0000287//magnesium ion binding;GO:0004610//phosphoacetylglucosamine mutase activity;GO:0004614//phosphoglucomutase activity	GO:0005975//carbohydrate metabolic process;GO:0006041//glucosamine metabolic process;GO:0006048//UDP-N-acetylglucosamine biosynthetic process;GO:0006487//protein N-linked glycosylation;GO:0006493//protein O-linked glycosylation;GO:0007283//spermatogenesis;GO:0019255//glucose 1-phosphate metabolic process;GO:0030097//hemopoiesis
MSTRG.11349.1	Sfur013893	0.983125054	2.02E-06	PGM3	Phosphoacetylglucosamine mutase	Metabolism;Metabolism	Global and overview maps;Carbohydrate metabolism	ko01100//Metabolic pathways;ko00520//Amino sugar and nucleotide sugar metabolism	K01836;K01836	GO:0005829//cytosol	GO:0000287//magnesium ion binding;GO:0004610//phosphoacetylglucosamine mutase activity;GO:0004614//phosphoglucomutase activity	GO:0005975//carbohydrate metabolic process;GO:0006041//glucosamine metabolic process;GO:0006048//UDP-N-acetylglucosamine biosynthetic process;GO:0006487//protein N-linked glycosylation;GO:0006493//protein O-linked glycosylation;GO:0007283//spermatogenesis;GO:0019255//glucose 1-phosphate metabolic process;GO:0030097//hemopoiesis
MSTRG.12968.2	Sfur013893	0.987522935	7.06E-07	PGM3	Phosphoacetylglucosamine mutase	Metabolism;Metabolism	Global and overview maps;Carbohydrate metabolism	ko01100//Metabolic pathways;ko00520//Amino sugar and nucleotide sugar metabolism	K01836;K01836	GO:0005829//cytosol	GO:0000287//magnesium ion binding;GO:0004610//phosphoacetylglucosamine mutase activity;GO:0004614//phosphoglucomutase activity	GO:0005975//carbohydrate metabolic process;GO:0006041//glucosamine metabolic process;GO:0006048//UDP-N-acetylglucosamine biosynthetic process;GO:0006487//protein N-linked glycosylation;GO:0006493//protein O-linked glycosylation;GO:0007283//spermatogenesis;GO:0019255//glucose 1-phosphate metabolic process;GO:0030097//hemopoiesis
MSTRG.14436.1	Sfur013893	0.99215124	1.40E-07	PGM3	Phosphoacetylglucosamine mutase	Metabolism;Metabolism	Global and overview maps;Carbohydrate metabolism	ko01100//Metabolic pathways;ko00520//Amino sugar and nucleotide sugar metabolism	K01836;K01836	GO:0005829//cytosol	GO:0000287//magnesium ion binding;GO:0004610//phosphoacetylglucosamine mutase activity;GO:0004614//phosphoglucomutase activity	GO:0005975//carbohydrate metabolic process;GO:0006041//glucosamine metabolic process;GO:0006048//UDP-N-acetylglucosamine biosynthetic process;GO:0006487//protein N-linked glycosylation;GO:0006493//protein O-linked glycosylation;GO:0007283//spermatogenesis;GO:0019255//glucose 1-phosphate metabolic process;GO:0030097//hemopoiesis
MSTRG.14662.2	Sfur013893	0.982984457	2.08E-06	PGM3	Phosphoacetylglucosamine mutase	Metabolism;Metabolism	Global and overview maps;Carbohydrate metabolism	ko01100//Metabolic pathways;ko00520//Amino sugar and nucleotide sugar metabolism	K01836;K01836	GO:0005829//cytosol	GO:0000287//magnesium ion binding;GO:0004610//phosphoacetylglucosamine mutase activity;GO:0004614//phosphoglucomutase activity	GO:0005975//carbohydrate metabolic process;GO:0006041//glucosamine metabolic process;GO:0006048//UDP-N-acetylglucosamine biosynthetic process;GO:0006487//protein N-linked glycosylation;GO:0006493//protein O-linked glycosylation;GO:0007283//spermatogenesis;GO:0019255//glucose 1-phosphate metabolic process;GO:0030097//hemopoiesis
MSTRG.15684.1	Sfur013893	0.983776211	1.76E-06	PGM3	Phosphoacetylglucosamine mutase	Metabolism;Metabolism	Global and overview maps;Carbohydrate metabolism	ko01100//Metabolic pathways;ko00520//Amino sugar and nucleotide sugar metabolism	K01836;K01836	GO:0005829//cytosol	GO:0000287//magnesium ion binding;GO:0004610//phosphoacetylglucosamine mutase activity;GO:0004614//phosphoglucomutase activity	GO:0005975//carbohydrate metabolic process;GO:0006041//glucosamine metabolic process;GO:0006048//UDP-N-acetylglucosamine biosynthetic process;GO:0006487//protein N-linked glycosylation;GO:0006493//protein O-linked glycosylation;GO:0007283//spermatogenesis;GO:0019255//glucose 1-phosphate metabolic process;GO:0030097//hemopoiesis
MSTRG.16086.1	Sfur013893	0.98212349	2.47E-06	PGM3	Phosphoacetylglucosamine mutase	Metabolism;Metabolism	Global and overview maps;Carbohydrate metabolism	ko01100//Metabolic pathways;ko00520//Amino sugar and nucleotide sugar metabolism	K01836;K01836	GO:0005829//cytosol	GO:0000287//magnesium ion binding;GO:0004610//phosphoacetylglucosamine mutase activity;GO:0004614//phosphoglucomutase activity	GO:0005975//carbohydrate metabolic process;GO:0006041//glucosamine metabolic process;GO:0006048//UDP-N-acetylglucosamine biosynthetic process;GO:0006487//protein N-linked glycosylation;GO:0006493//protein O-linked glycosylation;GO:0007283//spermatogenesis;GO:0019255//glucose 1-phosphate metabolic process;GO:0030097//hemopoiesis
MSTRG.16087.1	Sfur013893	0.985892087	1.08E-06	PGM3	Phosphoacetylglucosamine mutase	Metabolism;Metabolism	Global and overview maps;Carbohydrate metabolism	ko01100//Metabolic pathways;ko00520//Amino sugar and nucleotide sugar metabolism	K01836;K01836	GO:0005829//cytosol	GO:0000287//magnesium ion binding;GO:0004610//phosphoacetylglucosamine mutase activity;GO:0004614//phosphoglucomutase activity	GO:0005975//carbohydrate metabolic process;GO:0006041//glucosamine metabolic process;GO:0006048//UDP-N-acetylglucosamine biosynthetic process;GO:0006487//protein N-linked glycosylation;GO:0006493//protein O-linked glycosylation;GO:0007283//spermatogenesis;GO:0019255//glucose 1-phosphate metabolic process;GO:0030097//hemopoiesis
MSTRG.16908.1	Sfur013893	0.989321439	4.10E-07	PGM3	Phosphoacetylglucosamine mutase	Metabolism;Metabolism	Global and overview maps;Carbohydrate metabolism	ko01100//Metabolic pathways;ko00520//Amino sugar and nucleotide sugar metabolism	K01836;K01836	GO:0005829//cytosol	GO:0000287//magnesium ion binding;GO:0004610//phosphoacetylglucosamine mutase activity;GO:0004614//phosphoglucomutase activity	GO:0005975//carbohydrate metabolic process;GO:0006041//glucosamine metabolic process;GO:0006048//UDP-N-acetylglucosamine biosynthetic process;GO:0006487//protein N-linked glycosylation;GO:0006493//protein O-linked glycosylation;GO:0007283//spermatogenesis;GO:0019255//glucose 1-phosphate metabolic process;GO:0030097//hemopoiesis
MSTRG.1716.1	Sfur013893	0.982735113	2.19E-06	PGM3	Phosphoacetylglucosamine mutase	Metabolism;Metabolism	Global and overview maps;Carbohydrate metabolism	ko01100//Metabolic pathways;ko00520//Amino sugar and nucleotide sugar metabolism	K01836;K01836	GO:0005829//cytosol	GO:0000287//magnesium ion binding;GO:0004610//phosphoacetylglucosamine mutase activity;GO:0004614//phosphoglucomutase activity	GO:0005975//carbohydrate metabolic process;GO:0006041//glucosamine metabolic process;GO:0006048//UDP-N-acetylglucosamine biosynthetic process;GO:0006487//protein N-linked glycosylation;GO:0006493//protein O-linked glycosylation;GO:0007283//spermatogenesis;GO:0019255//glucose 1-phosphate metabolic process;GO:0030097//hemopoiesis
MSTRG.18635.5	Sfur013893	0.995658004	1.77E-08	PGM3	Phosphoacetylglucosamine mutase	Metabolism;Metabolism	Global and overview maps;Carbohydrate metabolism	ko01100//Metabolic pathways;ko00520//Amino sugar and nucleotide sugar metabolism	K01836;K01836	GO:0005829//cytosol	GO:0000287//magnesium ion binding;GO:0004610//phosphoacetylglucosamine mutase activity;GO:0004614//phosphoglucomutase activity	GO:0005975//carbohydrate metabolic process;GO:0006041//glucosamine metabolic process;GO:0006048//UDP-N-acetylglucosamine biosynthetic process;GO:0006487//protein N-linked glycosylation;GO:0006493//protein O-linked glycosylation;GO:0007283//spermatogenesis;GO:0019255//glucose 1-phosphate metabolic process;GO:0030097//hemopoiesis
MSTRG.20058.1	Sfur013893	0.983880563	1.72E-06	PGM3	Phosphoacetylglucosamine mutase	Metabolism;Metabolism	Global and overview maps;Carbohydrate metabolism	ko01100//Metabolic pathways;ko00520//Amino sugar and nucleotide sugar metabolism	K01836;K01836	GO:0005829//cytosol	GO:0000287//magnesium ion binding;GO:0004610//phosphoacetylglucosamine mutase activity;GO:0004614//phosphoglucomutase activity	GO:0005975//carbohydrate metabolic process;GO:0006041//glucosamine metabolic process;GO:0006048//UDP-N-acetylglucosamine biosynthetic process;GO:0006487//protein N-linked glycosylation;GO:0006493//protein O-linked glycosylation;GO:0007283//spermatogenesis;GO:0019255//glucose 1-phosphate metabolic process;GO:0030097//hemopoiesis
MSTRG.20196.1	Sfur013893	0.985960944	1.06E-06	PGM3	Phosphoacetylglucosamine mutase	Metabolism;Metabolism	Global and overview maps;Carbohydrate metabolism	ko01100//Metabolic pathways;ko00520//Amino sugar and nucleotide sugar metabolism	K01836;K01836	GO:0005829//cytosol	GO:0000287//magnesium ion binding;GO:0004610//phosphoacetylglucosamine mutase activity;GO:0004614//phosphoglucomutase activity	GO:0005975//carbohydrate metabolic process;GO:0006041//glucosamine metabolic process;GO:0006048//UDP-N-acetylglucosamine biosynthetic process;GO:0006487//protein N-linked glycosylation;GO:0006493//protein O-linked glycosylation;GO:0007283//spermatogenesis;GO:0019255//glucose 1-phosphate metabolic process;GO:0030097//hemopoiesis
MSTRG.2257.2	Sfur013893	0.991347393	1.97E-07	PGM3	Phosphoacetylglucosamine mutase	Metabolism;Metabolism	Global and overview maps;Carbohydrate metabolism	ko01100//Metabolic pathways;ko00520//Amino sugar and nucleotide sugar metabolism	K01836;K01836	GO:0005829//cytosol	GO:0000287//magnesium ion binding;GO:0004610//phosphoacetylglucosamine mutase activity;GO:0004614//phosphoglucomutase activity	GO:0005975//carbohydrate metabolic process;GO:0006041//glucosamine metabolic process;GO:0006048//UDP-N-acetylglucosamine biosynthetic process;GO:0006487//protein N-linked glycosylation;GO:0006493//protein O-linked glycosylation;GO:0007283//spermatogenesis;GO:0019255//glucose 1-phosphate metabolic process;GO:0030097//hemopoiesis
MSTRG.22908.1	Sfur013893	0.993860452	5.93E-08	PGM3	Phosphoacetylglucosamine mutase	Metabolism;Metabolism	Global and overview maps;Carbohydrate metabolism	ko01100//Metabolic pathways;ko00520//Amino sugar and nucleotide sugar metabolism	K01836;K01836	GO:0005829//cytosol	GO:0000287//magnesium ion binding;GO:0004610//phosphoacetylglucosamine mutase activity;GO:0004614//phosphoglucomutase activity	GO:0005975//carbohydrate metabolic process;GO:0006041//glucosamine metabolic process;GO:0006048//UDP-N-acetylglucosamine biosynthetic process;GO:0006487//protein N-linked glycosylation;GO:0006493//protein O-linked glycosylation;GO:0007283//spermatogenesis;GO:0019255//glucose 1-phosphate metabolic process;GO:0030097//hemopoiesis
MSTRG.23081.2	Sfur013893	0.981282076	2.90E-06	PGM3	Phosphoacetylglucosamine mutase	Metabolism;Metabolism	Global and overview maps;Carbohydrate metabolism	ko01100//Metabolic pathways;ko00520//Amino sugar and nucleotide sugar metabolism	K01836;K01836	GO:0005829//cytosol	GO:0000287//magnesium ion binding;GO:0004610//phosphoacetylglucosamine mutase activity;GO:0004614//phosphoglucomutase activity	GO:0005975//carbohydrate metabolic process;GO:0006041//glucosamine metabolic process;GO:0006048//UDP-N-acetylglucosamine biosynthetic process;GO:0006487//protein N-linked glycosylation;GO:0006493//protein O-linked glycosylation;GO:0007283//spermatogenesis;GO:0019255//glucose 1-phosphate metabolic process;GO:0030097//hemopoiesis
MSTRG.23212.1	Sfur013893	-0.982258583	2.41E-06	PGM3	Phosphoacetylglucosamine mutase	Metabolism;Metabolism	Global and overview maps;Carbohydrate metabolism	ko01100//Metabolic pathways;ko00520//Amino sugar and nucleotide sugar metabolism	K01836;K01836	GO:0005829//cytosol	GO:0000287//magnesium ion binding;GO:0004610//phosphoacetylglucosamine mutase activity;GO:0004614//phosphoglucomutase activity	GO:0005975//carbohydrate metabolic process;GO:0006041//glucosamine metabolic process;GO:0006048//UDP-N-acetylglucosamine biosynthetic process;GO:0006487//protein N-linked glycosylation;GO:0006493//protein O-linked glycosylation;GO:0007283//spermatogenesis;GO:0019255//glucose 1-phosphate metabolic process;GO:0030097//hemopoiesis
MSTRG.2446.2	Sfur013893	0.99175807	1.66E-07	PGM3	Phosphoacetylglucosamine mutase	Metabolism;Metabolism	Global and overview maps;Carbohydrate metabolism	ko01100//Metabolic pathways;ko00520//Amino sugar and nucleotide sugar metabolism	K01836;K01836	GO:0005829//cytosol	GO:0000287//magnesium ion binding;GO:0004610//phosphoacetylglucosamine mutase activity;GO:0004614//phosphoglucomutase activity	GO:0005975//carbohydrate metabolic process;GO:0006041//glucosamine metabolic process;GO:0006048//UDP-N-acetylglucosamine biosynthetic process;GO:0006487//protein N-linked glycosylation;GO:0006493//protein O-linked glycosylation;GO:0007283//spermatogenesis;GO:0019255//glucose 1-phosphate metabolic process;GO:0030097//hemopoiesis
MSTRG.2447.1	Sfur013893	0.989463517	3.91E-07	PGM3	Phosphoacetylglucosamine mutase	Metabolism;Metabolism	Global and overview maps;Carbohydrate metabolism	ko01100//Metabolic pathways;ko00520//Amino sugar and nucleotide sugar metabolism	K01836;K01836	GO:0005829//cytosol	GO:0000287//magnesium ion binding;GO:0004610//phosphoacetylglucosamine mutase activity;GO:0004614//phosphoglucomutase activity	GO:0005975//carbohydrate metabolic process;GO:0006041//glucosamine metabolic process;GO:0006048//UDP-N-acetylglucosamine biosynthetic process;GO:0006487//protein N-linked glycosylation;GO:0006493//protein O-linked glycosylation;GO:0007283//spermatogenesis;GO:0019255//glucose 1-phosphate metabolic process;GO:0030097//hemopoiesis
MSTRG.27226.1	Sfur013893	0.982635202	2.23E-06	PGM3	Phosphoacetylglucosamine mutase	Metabolism;Metabolism	Global and overview maps;Carbohydrate metabolism	ko01100//Metabolic pathways;ko00520//Amino sugar and nucleotide sugar metabolism	K01836;K01836	GO:0005829//cytosol	GO:0000287//magnesium ion binding;GO:0004610//phosphoacetylglucosamine mutase activity;GO:0004614//phosphoglucomutase activity	GO:0005975//carbohydrate metabolic process;GO:0006041//glucosamine metabolic process;GO:0006048//UDP-N-acetylglucosamine biosynthetic process;GO:0006487//protein N-linked glycosylation;GO:0006493//protein O-linked glycosylation;GO:0007283//spermatogenesis;GO:0019255//glucose 1-phosphate metabolic process;GO:0030097//hemopoiesis
MSTRG.27823.1	Sfur013893	0.993879691	5.87E-08	PGM3	Phosphoacetylglucosamine mutase	Metabolism;Metabolism	Global and overview maps;Carbohydrate metabolism	ko01100//Metabolic pathways;ko00520//Amino sugar and nucleotide sugar metabolism	K01836;K01836	GO:0005829//cytosol	GO:0000287//magnesium ion binding;GO:0004610//phosphoacetylglucosamine mutase activity;GO:0004614//phosphoglucomutase activity	GO:0005975//carbohydrate metabolic process;GO:0006041//glucosamine metabolic process;GO:0006048//UDP-N-acetylglucosamine biosynthetic process;GO:0006487//protein N-linked glycosylation;GO:0006493//protein O-linked glycosylation;GO:0007283//spermatogenesis;GO:0019255//glucose 1-phosphate metabolic process;GO:0030097//hemopoiesis
MSTRG.29422.2	Sfur013893	0.985591586	1.17E-06	PGM3	Phosphoacetylglucosamine mutase	Metabolism;Metabolism	Global and overview maps;Carbohydrate metabolism	ko01100//Metabolic pathways;ko00520//Amino sugar and nucleotide sugar metabolism	K01836;K01836	GO:0005829//cytosol	GO:0000287//magnesium ion binding;GO:0004610//phosphoacetylglucosamine mutase activity;GO:0004614//phosphoglucomutase activity	GO:0005975//carbohydrate metabolic process;GO:0006041//glucosamine metabolic process;GO:0006048//UDP-N-acetylglucosamine biosynthetic process;GO:0006487//protein N-linked glycosylation;GO:0006493//protein O-linked glycosylation;GO:0007283//spermatogenesis;GO:0019255//glucose 1-phosphate metabolic process;GO:0030097//hemopoiesis
MSTRG.29822.3	Sfur013893	0.987637787	6.83E-07	PGM3	Phosphoacetylglucosamine mutase	Metabolism;Metabolism	Global and overview maps;Carbohydrate metabolism	ko01100//Metabolic pathways;ko00520//Amino sugar and nucleotide sugar metabolism	K01836;K01836	GO:0005829//cytosol	GO:0000287//magnesium ion binding;GO:0004610//phosphoacetylglucosamine mutase activity;GO:0004614//phosphoglucomutase activity	GO:0005975//carbohydrate metabolic process;GO:0006041//glucosamine metabolic process;GO:0006048//UDP-N-acetylglucosamine biosynthetic process;GO:0006487//protein N-linked glycosylation;GO:0006493//protein O-linked glycosylation;GO:0007283//spermatogenesis;GO:0019255//glucose 1-phosphate metabolic process;GO:0030097//hemopoiesis
MSTRG.30274.1	Sfur013893	0.996168446	1.14E-08	PGM3	Phosphoacetylglucosamine mutase	Metabolism;Metabolism	Global and overview maps;Carbohydrate metabolism	ko01100//Metabolic pathways;ko00520//Amino sugar and nucleotide sugar metabolism	K01836;K01836	GO:0005829//cytosol	GO:0000287//magnesium ion binding;GO:0004610//phosphoacetylglucosamine mutase activity;GO:0004614//phosphoglucomutase activity	GO:0005975//carbohydrate metabolic process;GO:0006041//glucosamine metabolic process;GO:0006048//UDP-N-acetylglucosamine biosynthetic process;GO:0006487//protein N-linked glycosylation;GO:0006493//protein O-linked glycosylation;GO:0007283//spermatogenesis;GO:0019255//glucose 1-phosphate metabolic process;GO:0030097//hemopoiesis
MSTRG.32053.1	Sfur013893	0.986784567	8.62E-07	PGM3	Phosphoacetylglucosamine mutase	Metabolism;Metabolism	Global and overview maps;Carbohydrate metabolism	ko01100//Metabolic pathways;ko00520//Amino sugar and nucleotide sugar metabolism	K01836;K01836	GO:0005829//cytosol	GO:0000287//magnesium ion binding;GO:0004610//phosphoacetylglucosamine mutase activity;GO:0004614//phosphoglucomutase activity	GO:0005975//carbohydrate metabolic process;GO:0006041//glucosamine metabolic process;GO:0006048//UDP-N-acetylglucosamine biosynthetic process;GO:0006487//protein N-linked glycosylation;GO:0006493//protein O-linked glycosylation;GO:0007283//spermatogenesis;GO:0019255//glucose 1-phosphate metabolic process;GO:0030097//hemopoiesis
MSTRG.32766.1	Sfur013893	0.983126152	2.02E-06	PGM3	Phosphoacetylglucosamine mutase	Metabolism;Metabolism	Global and overview maps;Carbohydrate metabolism	ko01100//Metabolic pathways;ko00520//Amino sugar and nucleotide sugar metabolism	K01836;K01836	GO:0005829//cytosol	GO:0000287//magnesium ion binding;GO:0004610//phosphoacetylglucosamine mutase activity;GO:0004614//phosphoglucomutase activity	GO:0005975//carbohydrate metabolic process;GO:0006041//glucosamine metabolic process;GO:0006048//UDP-N-acetylglucosamine biosynthetic process;GO:0006487//protein N-linked glycosylation;GO:0006493//protein O-linked glycosylation;GO:0007283//spermatogenesis;GO:0019255//glucose 1-phosphate metabolic process;GO:0030097//hemopoiesis
MSTRG.32768.1	Sfur013893	0.995787019	1.59E-08	PGM3	Phosphoacetylglucosamine mutase	Metabolism;Metabolism	Global and overview maps;Carbohydrate metabolism	ko01100//Metabolic pathways;ko00520//Amino sugar and nucleotide sugar metabolism	K01836;K01836	GO:0005829//cytosol	GO:0000287//magnesium ion binding;GO:0004610//phosphoacetylglucosamine mutase activity;GO:0004614//phosphoglucomutase activity	GO:0005975//carbohydrate metabolic process;GO:0006041//glucosamine metabolic process;GO:0006048//UDP-N-acetylglucosamine biosynthetic process;GO:0006487//protein N-linked glycosylation;GO:0006493//protein O-linked glycosylation;GO:0007283//spermatogenesis;GO:0019255//glucose 1-phosphate metabolic process;GO:0030097//hemopoiesis
MSTRG.33771.1	Sfur013893	0.984119587	1.64E-06	PGM3	Phosphoacetylglucosamine mutase	Metabolism;Metabolism	Global and overview maps;Carbohydrate metabolism	ko01100//Metabolic pathways;ko00520//Amino sugar and nucleotide sugar metabolism	K01836;K01836	GO:0005829//cytosol	GO:0000287//magnesium ion binding;GO:0004610//phosphoacetylglucosamine mutase activity;GO:0004614//phosphoglucomutase activity	GO:0005975//carbohydrate metabolic process;GO:0006041//glucosamine metabolic process;GO:0006048//UDP-N-acetylglucosamine biosynthetic process;GO:0006487//protein N-linked glycosylation;GO:0006493//protein O-linked glycosylation;GO:0007283//spermatogenesis;GO:0019255//glucose 1-phosphate metabolic process;GO:0030097//hemopoiesis
MSTRG.33773.1	Sfur013893	0.98721142	7.69E-07	PGM3	Phosphoacetylglucosamine mutase	Metabolism;Metabolism	Global and overview maps;Carbohydrate metabolism	ko01100//Metabolic pathways;ko00520//Amino sugar and nucleotide sugar metabolism	K01836;K01836	GO:0005829//cytosol	GO:0000287//magnesium ion binding;GO:0004610//phosphoacetylglucosamine mutase activity;GO:0004614//phosphoglucomutase activity	GO:0005975//carbohydrate metabolic process;GO:0006041//glucosamine metabolic process;GO:0006048//UDP-N-acetylglucosamine biosynthetic process;GO:0006487//protein N-linked glycosylation;GO:0006493//protein O-linked glycosylation;GO:0007283//spermatogenesis;GO:0019255//glucose 1-phosphate metabolic process;GO:0030097//hemopoiesis
MSTRG.33855.2	Sfur013893	0.98852595	5.27E-07	PGM3	Phosphoacetylglucosamine mutase	Metabolism;Metabolism	Global and overview maps;Carbohydrate metabolism	ko01100//Metabolic pathways;ko00520//Amino sugar and nucleotide sugar metabolism	K01836;K01836	GO:0005829//cytosol	GO:0000287//magnesium ion binding;GO:0004610//phosphoacetylglucosamine mutase activity;GO:0004614//phosphoglucomutase activity	GO:0005975//carbohydrate metabolic process;GO:0006041//glucosamine metabolic process;GO:0006048//UDP-N-acetylglucosamine biosynthetic process;GO:0006487//protein N-linked glycosylation;GO:0006493//protein O-linked glycosylation;GO:0007283//spermatogenesis;GO:0019255//glucose 1-phosphate metabolic process;GO:0030097//hemopoiesis
MSTRG.34473.3	Sfur013893	0.986536113	9.20E-07	PGM3	Phosphoacetylglucosamine mutase	Metabolism;Metabolism	Global and overview maps;Carbohydrate metabolism	ko01100//Metabolic pathways;ko00520//Amino sugar and nucleotide sugar metabolism	K01836;K01836	GO:0005829//cytosol	GO:0000287//magnesium ion binding;GO:0004610//phosphoacetylglucosamine mutase activity;GO:0004614//phosphoglucomutase activity	GO:0005975//carbohydrate metabolic process;GO:0006041//glucosamine metabolic process;GO:0006048//UDP-N-acetylglucosamine biosynthetic process;GO:0006487//protein N-linked glycosylation;GO:0006493//protein O-linked glycosylation;GO:0007283//spermatogenesis;GO:0019255//glucose 1-phosphate metabolic process;GO:0030097//hemopoiesis
MSTRG.34474.2	Sfur013893	0.990081796	3.17E-07	PGM3	Phosphoacetylglucosamine mutase	Metabolism;Metabolism	Global and overview maps;Carbohydrate metabolism	ko01100//Metabolic pathways;ko00520//Amino sugar and nucleotide sugar metabolism	K01836;K01836	GO:0005829//cytosol	GO:0000287//magnesium ion binding;GO:0004610//phosphoacetylglucosamine mutase activity;GO:0004614//phosphoglucomutase activity	GO:0005975//carbohydrate metabolic process;GO:0006041//glucosamine metabolic process;GO:0006048//UDP-N-acetylglucosamine biosynthetic process;GO:0006487//protein N-linked glycosylation;GO:0006493//protein O-linked glycosylation;GO:0007283//spermatogenesis;GO:0019255//glucose 1-phosphate metabolic process;GO:0030097//hemopoiesis
MSTRG.34874.1	Sfur013893	0.985535785	1.18E-06	PGM3	Phosphoacetylglucosamine mutase	Metabolism;Metabolism	Global and overview maps;Carbohydrate metabolism	ko01100//Metabolic pathways;ko00520//Amino sugar and nucleotide sugar metabolism	K01836;K01836	GO:0005829//cytosol	GO:0000287//magnesium ion binding;GO:0004610//phosphoacetylglucosamine mutase activity;GO:0004614//phosphoglucomutase activity	GO:0005975//carbohydrate metabolic process;GO:0006041//glucosamine metabolic process;GO:0006048//UDP-N-acetylglucosamine biosynthetic process;GO:0006487//protein N-linked glycosylation;GO:0006493//protein O-linked glycosylation;GO:0007283//spermatogenesis;GO:0019255//glucose 1-phosphate metabolic process;GO:0030097//hemopoiesis
MSTRG.34875.1	Sfur013893	0.981206426	2.94E-06	PGM3	Phosphoacetylglucosamine mutase	Metabolism;Metabolism	Global and overview maps;Carbohydrate metabolism	ko01100//Metabolic pathways;ko00520//Amino sugar and nucleotide sugar metabolism	K01836;K01836	GO:0005829//cytosol	GO:0000287//magnesium ion binding;GO:0004610//phosphoacetylglucosamine mutase activity;GO:0004614//phosphoglucomutase activity	GO:0005975//carbohydrate metabolic process;GO:0006041//glucosamine metabolic process;GO:0006048//UDP-N-acetylglucosamine biosynthetic process;GO:0006487//protein N-linked glycosylation;GO:0006493//protein O-linked glycosylation;GO:0007283//spermatogenesis;GO:0019255//glucose 1-phosphate metabolic process;GO:0030097//hemopoiesis
MSTRG.36079.1	Sfur013893	0.989553066	3.80E-07	PGM3	Phosphoacetylglucosamine mutase	Metabolism;Metabolism	Global and overview maps;Carbohydrate metabolism	ko01100//Metabolic pathways;ko00520//Amino sugar and nucleotide sugar metabolism	K01836;K01836	GO:0005829//cytosol	GO:0000287//magnesium ion binding;GO:0004610//phosphoacetylglucosamine mutase activity;GO:0004614//phosphoglucomutase activity	GO:0005975//carbohydrate metabolic process;GO:0006041//glucosamine metabolic process;GO:0006048//UDP-N-acetylglucosamine biosynthetic process;GO:0006487//protein N-linked glycosylation;GO:0006493//protein O-linked glycosylation;GO:0007283//spermatogenesis;GO:0019255//glucose 1-phosphate metabolic process;GO:0030097//hemopoiesis
MSTRG.36087.1	Sfur013893	0.982716909	2.20E-06	PGM3	Phosphoacetylglucosamine mutase	Metabolism;Metabolism	Global and overview maps;Carbohydrate metabolism	ko01100//Metabolic pathways;ko00520//Amino sugar and nucleotide sugar metabolism	K01836;K01836	GO:0005829//cytosol	GO:0000287//magnesium ion binding;GO:0004610//phosphoacetylglucosamine mutase activity;GO:0004614//phosphoglucomutase activity	GO:0005975//carbohydrate metabolic process;GO:0006041//glucosamine metabolic process;GO:0006048//UDP-N-acetylglucosamine biosynthetic process;GO:0006487//protein N-linked glycosylation;GO:0006493//protein O-linked glycosylation;GO:0007283//spermatogenesis;GO:0019255//glucose 1-phosphate metabolic process;GO:0030097//hemopoiesis
MSTRG.38291.5	Sfur013893	0.993324633	7.95E-08	PGM3	Phosphoacetylglucosamine mutase	Metabolism;Metabolism	Global and overview maps;Carbohydrate metabolism	ko01100//Metabolic pathways;ko00520//Amino sugar and nucleotide sugar metabolism	K01836;K01836	GO:0005829//cytosol	GO:0000287//magnesium ion binding;GO:0004610//phosphoacetylglucosamine mutase activity;GO:0004614//phosphoglucomutase activity	GO:0005975//carbohydrate metabolic process;GO:0006041//glucosamine metabolic process;GO:0006048//UDP-N-acetylglucosamine biosynthetic process;GO:0006487//protein N-linked glycosylation;GO:0006493//protein O-linked glycosylation;GO:0007283//spermatogenesis;GO:0019255//glucose 1-phosphate metabolic process;GO:0030097//hemopoiesis
MSTRG.39026.1	Sfur013893	0.994053326	5.31E-08	PGM3	Phosphoacetylglucosamine mutase	Metabolism;Metabolism	Global and overview maps;Carbohydrate metabolism	ko01100//Metabolic pathways;ko00520//Amino sugar and nucleotide sugar metabolism	K01836;K01836	GO:0005829//cytosol	GO:0000287//magnesium ion binding;GO:0004610//phosphoacetylglucosamine mutase activity;GO:0004614//phosphoglucomutase activity	GO:0005975//carbohydrate metabolic process;GO:0006041//glucosamine metabolic process;GO:0006048//UDP-N-acetylglucosamine biosynthetic process;GO:0006487//protein N-linked glycosylation;GO:0006493//protein O-linked glycosylation;GO:0007283//spermatogenesis;GO:0019255//glucose 1-phosphate metabolic process;GO:0030097//hemopoiesis
MSTRG.4310.1	Sfur013893	0.983518416	1.86E-06	PGM3	Phosphoacetylglucosamine mutase	Metabolism;Metabolism	Global and overview maps;Carbohydrate metabolism	ko01100//Metabolic pathways;ko00520//Amino sugar and nucleotide sugar metabolism	K01836;K01836	GO:0005829//cytosol	GO:0000287//magnesium ion binding;GO:0004610//phosphoacetylglucosamine mutase activity;GO:0004614//phosphoglucomutase activity	GO:0005975//carbohydrate metabolic process;GO:0006041//glucosamine metabolic process;GO:0006048//UDP-N-acetylglucosamine biosynthetic process;GO:0006487//protein N-linked glycosylation;GO:0006493//protein O-linked glycosylation;GO:0007283//spermatogenesis;GO:0019255//glucose 1-phosphate metabolic process;GO:0030097//hemopoiesis
MSTRG.4371.1	Sfur013893	0.982384711	2.35E-06	PGM3	Phosphoacetylglucosamine mutase	Metabolism;Metabolism	Global and overview maps;Carbohydrate metabolism	ko01100//Metabolic pathways;ko00520//Amino sugar and nucleotide sugar metabolism	K01836;K01836	GO:0005829//cytosol	GO:0000287//magnesium ion binding;GO:0004610//phosphoacetylglucosamine mutase activity;GO:0004614//phosphoglucomutase activity	GO:0005975//carbohydrate metabolic process;GO:0006041//glucosamine metabolic process;GO:0006048//UDP-N-acetylglucosamine biosynthetic process;GO:0006487//protein N-linked glycosylation;GO:0006493//protein O-linked glycosylation;GO:0007283//spermatogenesis;GO:0019255//glucose 1-phosphate metabolic process;GO:0030097//hemopoiesis
MSTRG.6175.1	Sfur013893	0.992301594	1.31E-07	PGM3	Phosphoacetylglucosamine mutase	Metabolism;Metabolism	Global and overview maps;Carbohydrate metabolism	ko01100//Metabolic pathways;ko00520//Amino sugar and nucleotide sugar metabolism	K01836;K01836	GO:0005829//cytosol	GO:0000287//magnesium ion binding;GO:0004610//phosphoacetylglucosamine mutase activity;GO:0004614//phosphoglucomutase activity	GO:0005975//carbohydrate metabolic process;GO:0006041//glucosamine metabolic process;GO:0006048//UDP-N-acetylglucosamine biosynthetic process;GO:0006487//protein N-linked glycosylation;GO:0006493//protein O-linked glycosylation;GO:0007283//spermatogenesis;GO:0019255//glucose 1-phosphate metabolic process;GO:0030097//hemopoiesis
MSTRG.8569.4	Sfur013893	0.989141273	4.35E-07	PGM3	Phosphoacetylglucosamine mutase	Metabolism;Metabolism	Global and overview maps;Carbohydrate metabolism	ko01100//Metabolic pathways;ko00520//Amino sugar and nucleotide sugar metabolism	K01836;K01836	GO:0005829//cytosol	GO:0000287//magnesium ion binding;GO:0004610//phosphoacetylglucosamine mutase activity;GO:0004614//phosphoglucomutase activity	GO:0005975//carbohydrate metabolic process;GO:0006041//glucosamine metabolic process;GO:0006048//UDP-N-acetylglucosamine biosynthetic process;GO:0006487//protein N-linked glycosylation;GO:0006493//protein O-linked glycosylation;GO:0007283//spermatogenesis;GO:0019255//glucose 1-phosphate metabolic process;GO:0030097//hemopoiesis
MSTRG.32265.2	Sfur014149	0.981005848	3.05E-06	--	Chitin deacetylase 8	Metabolism;Metabolism	Global and overview maps;Carbohydrate metabolism	ko01100//Metabolic pathways;ko00520//Amino sugar and nucleotide sugar metabolism	K01183;K01183	GO:0005615//extracellular space	GO:0004099//chitin deacetylase activity;GO:0008270//zinc ion binding	GO:0000272//polysaccharide catabolic process;GO:0006032//chitin catabolic process
MSTRG.34897.5	Sfur014149	0.984047954	1.66E-06	--	Chitin deacetylase 8	Metabolism;Metabolism	Global and overview maps;Carbohydrate metabolism	ko01100//Metabolic pathways;ko00520//Amino sugar and nucleotide sugar metabolism	K01183;K01183	GO:0005615//extracellular space	GO:0004099//chitin deacetylase activity;GO:0008270//zinc ion binding	GO:0000272//polysaccharide catabolic process;GO:0006032//chitin catabolic process
MSTRG.36368.1	Sfur014149	0.984138675	1.63E-06	--	Chitin deacetylase 8	Metabolism;Metabolism	Global and overview maps;Carbohydrate metabolism	ko01100//Metabolic pathways;ko00520//Amino sugar and nucleotide sugar metabolism	K01183;K01183	GO:0005615//extracellular space	GO:0004099//chitin deacetylase activity;GO:0008270//zinc ion binding	GO:0000272//polysaccharide catabolic process;GO:0006032//chitin catabolic process
MSTRG.10749.1	Sfur014856	0.992438088	1.23E-07	Hr4	Hormone receptor 4	-	-	-	-	GO:0000790//nuclear chromatin;GO:0005634//nucleus;GO:0005737//cytoplasm	GO:0000978//RNA polymerase II core promoter proximal region sequence-specific DNA binding;GO:0004879//RNA polymerase II transcription factor activity, ligand-activated sequence-specific DNA binding;GO:0008270//zinc ion binding	GO:0006357//regulation of transcription from RNA polymerase II promoter;GO:0040018//positive regulation of multicellular organism growth;GO:0045892//negative regulation of transcription, DNA-templated;GO:0048638//regulation of developmental growth;GO:0071456//cellular response to hypoxia
MSTRG.11800.2	Sfur014856	0.997191202	3.86E-09	Hr4	Hormone receptor 4	-	-	-	-	GO:0000790//nuclear chromatin;GO:0005634//nucleus;GO:0005737//cytoplasm	GO:0000978//RNA polymerase II core promoter proximal region sequence-specific DNA binding;GO:0004879//RNA polymerase II transcription factor activity, ligand-activated sequence-specific DNA binding;GO:0008270//zinc ion binding	GO:0006357//regulation of transcription from RNA polymerase II promoter;GO:0040018//positive regulation of multicellular organism growth;GO:0045892//negative regulation of transcription, DNA-templated;GO:0048638//regulation of developmental growth;GO:0071456//cellular response to hypoxia
MSTRG.12083.1	Sfur014856	0.982231832	2.42E-06	Hr4	Hormone receptor 4	-	-	-	-	GO:0000790//nuclear chromatin;GO:0005634//nucleus;GO:0005737//cytoplasm	GO:0000978//RNA polymerase II core promoter proximal region sequence-specific DNA binding;GO:0004879//RNA polymerase II transcription factor activity, ligand-activated sequence-specific DNA binding;GO:0008270//zinc ion binding	GO:0006357//regulation of transcription from RNA polymerase II promoter;GO:0040018//positive regulation of multicellular organism growth;GO:0045892//negative regulation of transcription, DNA-templated;GO:0048638//regulation of developmental growth;GO:0071456//cellular response to hypoxia
MSTRG.12179.1	Sfur014856	0.981096747	3.00E-06	Hr4	Hormone receptor 4	-	-	-	-	GO:0000790//nuclear chromatin;GO:0005634//nucleus;GO:0005737//cytoplasm	GO:0000978//RNA polymerase II core promoter proximal region sequence-specific DNA binding;GO:0004879//RNA polymerase II transcription factor activity, ligand-activated sequence-specific DNA binding;GO:0008270//zinc ion binding	GO:0006357//regulation of transcription from RNA polymerase II promoter;GO:0040018//positive regulation of multicellular organism growth;GO:0045892//negative regulation of transcription, DNA-templated;GO:0048638//regulation of developmental growth;GO:0071456//cellular response to hypoxia
MSTRG.16908.1	Sfur014856	0.99054135	2.68E-07	Hr4	Hormone receptor 4	-	-	-	-	GO:0000790//nuclear chromatin;GO:0005634//nucleus;GO:0005737//cytoplasm	GO:0000978//RNA polymerase II core promoter proximal region sequence-specific DNA binding;GO:0004879//RNA polymerase II transcription factor activity, ligand-activated sequence-specific DNA binding;GO:0008270//zinc ion binding	GO:0006357//regulation of transcription from RNA polymerase II promoter;GO:0040018//positive regulation of multicellular organism growth;GO:0045892//negative regulation of transcription, DNA-templated;GO:0048638//regulation of developmental growth;GO:0071456//cellular response to hypoxia
MSTRG.18098.3	Sfur014856	0.984025168	1.67E-06	Hr4	Hormone receptor 4	-	-	-	-	GO:0000790//nuclear chromatin;GO:0005634//nucleus;GO:0005737//cytoplasm	GO:0000978//RNA polymerase II core promoter proximal region sequence-specific DNA binding;GO:0004879//RNA polymerase II transcription factor activity, ligand-activated sequence-specific DNA binding;GO:0008270//zinc ion binding	GO:0006357//regulation of transcription from RNA polymerase II promoter;GO:0040018//positive regulation of multicellular organism growth;GO:0045892//negative regulation of transcription, DNA-templated;GO:0048638//regulation of developmental growth;GO:0071456//cellular response to hypoxia
MSTRG.20196.1	Sfur014856	0.983386776	1.91E-06	Hr4	Hormone receptor 4	-	-	-	-	GO:0000790//nuclear chromatin;GO:0005634//nucleus;GO:0005737//cytoplasm	GO:0000978//RNA polymerase II core promoter proximal region sequence-specific DNA binding;GO:0004879//RNA polymerase II transcription factor activity, ligand-activated sequence-specific DNA binding;GO:0008270//zinc ion binding	GO:0006357//regulation of transcription from RNA polymerase II promoter;GO:0040018//positive regulation of multicellular organism growth;GO:0045892//negative regulation of transcription, DNA-templated;GO:0048638//regulation of developmental growth;GO:0071456//cellular response to hypoxia
MSTRG.21259.5	Sfur014856	0.983750003	1.77E-06	Hr4	Hormone receptor 4	-	-	-	-	GO:0000790//nuclear chromatin;GO:0005634//nucleus;GO:0005737//cytoplasm	GO:0000978//RNA polymerase II core promoter proximal region sequence-specific DNA binding;GO:0004879//RNA polymerase II transcription factor activity, ligand-activated sequence-specific DNA binding;GO:0008270//zinc ion binding	GO:0006357//regulation of transcription from RNA polymerase II promoter;GO:0040018//positive regulation of multicellular organism growth;GO:0045892//negative regulation of transcription, DNA-templated;GO:0048638//regulation of developmental growth;GO:0071456//cellular response to hypoxia
MSTRG.2447.1	Sfur014856	0.987057732	8.02E-07	Hr4	Hormone receptor 4	-	-	-	-	GO:0000790//nuclear chromatin;GO:0005634//nucleus;GO:0005737//cytoplasm	GO:0000978//RNA polymerase II core promoter proximal region sequence-specific DNA binding;GO:0004879//RNA polymerase II transcription factor activity, ligand-activated sequence-specific DNA binding;GO:0008270//zinc ion binding	GO:0006357//regulation of transcription from RNA polymerase II promoter;GO:0040018//positive regulation of multicellular organism growth;GO:0045892//negative regulation of transcription, DNA-templated;GO:0048638//regulation of developmental growth;GO:0071456//cellular response to hypoxia
MSTRG.25578.1	Sfur014856	0.981559345	2.75E-06	Hr4	Hormone receptor 4	-	-	-	-	GO:0000790//nuclear chromatin;GO:0005634//nucleus;GO:0005737//cytoplasm	GO:0000978//RNA polymerase II core promoter proximal region sequence-specific DNA binding;GO:0004879//RNA polymerase II transcription factor activity, ligand-activated sequence-specific DNA binding;GO:0008270//zinc ion binding	GO:0006357//regulation of transcription from RNA polymerase II promoter;GO:0040018//positive regulation of multicellular organism growth;GO:0045892//negative regulation of transcription, DNA-templated;GO:0048638//regulation of developmental growth;GO:0071456//cellular response to hypoxia
MSTRG.32068.1	Sfur014856	0.99593565	1.40E-08	Hr4	Hormone receptor 4	-	-	-	-	GO:0000790//nuclear chromatin;GO:0005634//nucleus;GO:0005737//cytoplasm	GO:0000978//RNA polymerase II core promoter proximal region sequence-specific DNA binding;GO:0004879//RNA polymerase II transcription factor activity, ligand-activated sequence-specific DNA binding;GO:0008270//zinc ion binding	GO:0006357//regulation of transcription from RNA polymerase II promoter;GO:0040018//positive regulation of multicellular organism growth;GO:0045892//negative regulation of transcription, DNA-templated;GO:0048638//regulation of developmental growth;GO:0071456//cellular response to hypoxia
MSTRG.33279.1	Sfur014856	0.988853127	4.76E-07	Hr4	Hormone receptor 4	-	-	-	-	GO:0000790//nuclear chromatin;GO:0005634//nucleus;GO:0005737//cytoplasm	GO:0000978//RNA polymerase II core promoter proximal region sequence-specific DNA binding;GO:0004879//RNA polymerase II transcription factor activity, ligand-activated sequence-specific DNA binding;GO:0008270//zinc ion binding	GO:0006357//regulation of transcription from RNA polymerase II promoter;GO:0040018//positive regulation of multicellular organism growth;GO:0045892//negative regulation of transcription, DNA-templated;GO:0048638//regulation of developmental growth;GO:0071456//cellular response to hypoxia
MSTRG.33771.1	Sfur014856	0.988971399	4.59E-07	Hr4	Hormone receptor 4	-	-	-	-	GO:0000790//nuclear chromatin;GO:0005634//nucleus;GO:0005737//cytoplasm	GO:0000978//RNA polymerase II core promoter proximal region sequence-specific DNA binding;GO:0004879//RNA polymerase II transcription factor activity, ligand-activated sequence-specific DNA binding;GO:0008270//zinc ion binding	GO:0006357//regulation of transcription from RNA polymerase II promoter;GO:0040018//positive regulation of multicellular organism growth;GO:0045892//negative regulation of transcription, DNA-templated;GO:0048638//regulation of developmental growth;GO:0071456//cellular response to hypoxia
MSTRG.33772.1	Sfur014856	0.990007746	3.25E-07	Hr4	Hormone receptor 4	-	-	-	-	GO:0000790//nuclear chromatin;GO:0005634//nucleus;GO:0005737//cytoplasm	GO:0000978//RNA polymerase II core promoter proximal region sequence-specific DNA binding;GO:0004879//RNA polymerase II transcription factor activity, ligand-activated sequence-specific DNA binding;GO:0008270//zinc ion binding	GO:0006357//regulation of transcription from RNA polymerase II promoter;GO:0040018//positive regulation of multicellular organism growth;GO:0045892//negative regulation of transcription, DNA-templated;GO:0048638//regulation of developmental growth;GO:0071456//cellular response to hypoxia
MSTRG.33773.1	Sfur014856	0.995398776	2.17E-08	Hr4	Hormone receptor 4	-	-	-	-	GO:0000790//nuclear chromatin;GO:0005634//nucleus;GO:0005737//cytoplasm	GO:0000978//RNA polymerase II core promoter proximal region sequence-specific DNA binding;GO:0004879//RNA polymerase II transcription factor activity, ligand-activated sequence-specific DNA binding;GO:0008270//zinc ion binding	GO:0006357//regulation of transcription from RNA polymerase II promoter;GO:0040018//positive regulation of multicellular organism growth;GO:0045892//negative regulation of transcription, DNA-templated;GO:0048638//regulation of developmental growth;GO:0071456//cellular response to hypoxia
MSTRG.33855.2	Sfur014856	0.986395292	9.54E-07	Hr4	Hormone receptor 4	-	-	-	-	GO:0000790//nuclear chromatin;GO:0005634//nucleus;GO:0005737//cytoplasm	GO:0000978//RNA polymerase II core promoter proximal region sequence-specific DNA binding;GO:0004879//RNA polymerase II transcription factor activity, ligand-activated sequence-specific DNA binding;GO:0008270//zinc ion binding	GO:0006357//regulation of transcription from RNA polymerase II promoter;GO:0040018//positive regulation of multicellular organism growth;GO:0045892//negative regulation of transcription, DNA-templated;GO:0048638//regulation of developmental growth;GO:0071456//cellular response to hypoxia
MSTRG.34229.1	Sfur014856	0.998047892	1.08E-09	Hr4	Hormone receptor 4	-	-	-	-	GO:0000790//nuclear chromatin;GO:0005634//nucleus;GO:0005737//cytoplasm	GO:0000978//RNA polymerase II core promoter proximal region sequence-specific DNA binding;GO:0004879//RNA polymerase II transcription factor activity, ligand-activated sequence-specific DNA binding;GO:0008270//zinc ion binding	GO:0006357//regulation of transcription from RNA polymerase II promoter;GO:0040018//positive regulation of multicellular organism growth;GO:0045892//negative regulation of transcription, DNA-templated;GO:0048638//regulation of developmental growth;GO:0071456//cellular response to hypoxia
MSTRG.36087.1	Sfur014856	0.994591089	3.81E-08	Hr4	Hormone receptor 4	-	-	-	-	GO:0000790//nuclear chromatin;GO:0005634//nucleus;GO:0005737//cytoplasm	GO:0000978//RNA polymerase II core promoter proximal region sequence-specific DNA binding;GO:0004879//RNA polymerase II transcription factor activity, ligand-activated sequence-specific DNA binding;GO:0008270//zinc ion binding	GO:0006357//regulation of transcription from RNA polymerase II promoter;GO:0040018//positive regulation of multicellular organism growth;GO:0045892//negative regulation of transcription, DNA-templated;GO:0048638//regulation of developmental growth;GO:0071456//cellular response to hypoxia
MSTRG.3731.1	Sfur014856	0.983095949	2.03E-06	Hr4	Hormone receptor 4	-	-	-	-	GO:0000790//nuclear chromatin;GO:0005634//nucleus;GO:0005737//cytoplasm	GO:0000978//RNA polymerase II core promoter proximal region sequence-specific DNA binding;GO:0004879//RNA polymerase II transcription factor activity, ligand-activated sequence-specific DNA binding;GO:0008270//zinc ion binding	GO:0006357//regulation of transcription from RNA polymerase II promoter;GO:0040018//positive regulation of multicellular organism growth;GO:0045892//negative regulation of transcription, DNA-templated;GO:0048638//regulation of developmental growth;GO:0071456//cellular response to hypoxia
MSTRG.4917.1	Sfur014856	0.984803932	1.40E-06	Hr4	Hormone receptor 4	-	-	-	-	GO:0000790//nuclear chromatin;GO:0005634//nucleus;GO:0005737//cytoplasm	GO:0000978//RNA polymerase II core promoter proximal region sequence-specific DNA binding;GO:0004879//RNA polymerase II transcription factor activity, ligand-activated sequence-specific DNA binding;GO:0008270//zinc ion binding	GO:0006357//regulation of transcription from RNA polymerase II promoter;GO:0040018//positive regulation of multicellular organism growth;GO:0045892//negative regulation of transcription, DNA-templated;GO:0048638//regulation of developmental growth;GO:0071456//cellular response to hypoxia
MSTRG.5073.2	Sfur014856	0.990720038	2.51E-07	Hr4	Hormone receptor 4	-	-	-	-	GO:0000790//nuclear chromatin;GO:0005634//nucleus;GO:0005737//cytoplasm	GO:0000978//RNA polymerase II core promoter proximal region sequence-specific DNA binding;GO:0004879//RNA polymerase II transcription factor activity, ligand-activated sequence-specific DNA binding;GO:0008270//zinc ion binding	GO:0006357//regulation of transcription from RNA polymerase II promoter;GO:0040018//positive regulation of multicellular organism growth;GO:0045892//negative regulation of transcription, DNA-templated;GO:0048638//regulation of developmental growth;GO:0071456//cellular response to hypoxia
MSTRG.833.2	Sfur014856	0.984700037	1.44E-06	Hr4	Hormone receptor 4	-	-	-	-	GO:0000790//nuclear chromatin;GO:0005634//nucleus;GO:0005737//cytoplasm	GO:0000978//RNA polymerase II core promoter proximal region sequence-specific DNA binding;GO:0004879//RNA polymerase II transcription factor activity, ligand-activated sequence-specific DNA binding;GO:0008270//zinc ion binding	GO:0006357//regulation of transcription from RNA polymerase II promoter;GO:0040018//positive regulation of multicellular organism growth;GO:0045892//negative regulation of transcription, DNA-templated;GO:0048638//regulation of developmental growth;GO:0071456//cellular response to hypoxia
MSTRG.8569.3	Sfur014856	0.984481144	1.51E-06	Hr4	Hormone receptor 4	-	-	-	-	GO:0000790//nuclear chromatin;GO:0005634//nucleus;GO:0005737//cytoplasm	GO:0000978//RNA polymerase II core promoter proximal region sequence-specific DNA binding;GO:0004879//RNA polymerase II transcription factor activity, ligand-activated sequence-specific DNA binding;GO:0008270//zinc ion binding	GO:0006357//regulation of transcription from RNA polymerase II promoter;GO:0040018//positive regulation of multicellular organism growth;GO:0045892//negative regulation of transcription, DNA-templated;GO:0048638//regulation of developmental growth;GO:0071456//cellular response to hypoxia
MSTRG.10749.1	Sfur015140	0.987237729	7.64E-07	--	Putative uncharacterized protein	Human Diseases;Human Diseases;Environmental Information Processing;Cellular Processes;Organismal Systems;Organismal Systems;Environmental Information Processing;Human Diseases;Human Diseases;Human Diseases	Cancers;Infectious diseases;Signal transduction;Cellular community - eukaryotes;Digestive system;Endocrine system;Signaling molecules and interaction;Infectious diseases;Endocrine and metabolic diseases;Cancers	ko05200//Pathways in cancer;ko05165//Human papillomavirus infection;ko04151//PI3K-Akt signaling pathway;ko04510//Focal adhesion;ko04974//Protein digestion and absorption;ko04926//Relaxin signaling pathway;ko04512//ECM-receptor interaction;ko05146//Amoebiasis;ko04933//AGE-RAGE signaling pathway in diabetic complications;ko05222//Small cell lung cancer	K06237;K06237;K06237;K06237;K06237;K06237;K06237;K06237;K06237;K06237	-	-	-
MSTRG.11800.2	Sfur015140	0.999586058	4.75E-12	--	Putative uncharacterized protein	Human Diseases;Human Diseases;Environmental Information Processing;Cellular Processes;Organismal Systems;Organismal Systems;Environmental Information Processing;Human Diseases;Human Diseases;Human Diseases	Cancers;Infectious diseases;Signal transduction;Cellular community - eukaryotes;Digestive system;Endocrine system;Signaling molecules and interaction;Infectious diseases;Endocrine and metabolic diseases;Cancers	ko05200//Pathways in cancer;ko05165//Human papillomavirus infection;ko04151//PI3K-Akt signaling pathway;ko04510//Focal adhesion;ko04974//Protein digestion and absorption;ko04926//Relaxin signaling pathway;ko04512//ECM-receptor interaction;ko05146//Amoebiasis;ko04933//AGE-RAGE signaling pathway in diabetic complications;ko05222//Small cell lung cancer	K06237;K06237;K06237;K06237;K06237;K06237;K06237;K06237;K06237;K06237	-	-	-
MSTRG.12083.1	Sfur015140	0.992986653	9.45E-08	--	Putative uncharacterized protein	Human Diseases;Human Diseases;Environmental Information Processing;Cellular Processes;Organismal Systems;Organismal Systems;Environmental Information Processing;Human Diseases;Human Diseases;Human Diseases	Cancers;Infectious diseases;Signal transduction;Cellular community - eukaryotes;Digestive system;Endocrine system;Signaling molecules and interaction;Infectious diseases;Endocrine and metabolic diseases;Cancers	ko05200//Pathways in cancer;ko05165//Human papillomavirus infection;ko04151//PI3K-Akt signaling pathway;ko04510//Focal adhesion;ko04974//Protein digestion and absorption;ko04926//Relaxin signaling pathway;ko04512//ECM-receptor interaction;ko05146//Amoebiasis;ko04933//AGE-RAGE signaling pathway in diabetic complications;ko05222//Small cell lung cancer	K06237;K06237;K06237;K06237;K06237;K06237;K06237;K06237;K06237;K06237	-	-	-
MSTRG.12179.1	Sfur015140	0.986702591	8.81E-07	--	Putative uncharacterized protein	Human Diseases;Human Diseases;Environmental Information Processing;Cellular Processes;Organismal Systems;Organismal Systems;Environmental Information Processing;Human Diseases;Human Diseases;Human Diseases	Cancers;Infectious diseases;Signal transduction;Cellular community - eukaryotes;Digestive system;Endocrine system;Signaling molecules and interaction;Infectious diseases;Endocrine and metabolic diseases;Cancers	ko05200//Pathways in cancer;ko05165//Human papillomavirus infection;ko04151//PI3K-Akt signaling pathway;ko04510//Focal adhesion;ko04974//Protein digestion and absorption;ko04926//Relaxin signaling pathway;ko04512//ECM-receptor interaction;ko05146//Amoebiasis;ko04933//AGE-RAGE signaling pathway in diabetic complications;ko05222//Small cell lung cancer	K06237;K06237;K06237;K06237;K06237;K06237;K06237;K06237;K06237;K06237	-	-	-
MSTRG.14566.1	Sfur015140	0.980569073	3.30E-06	--	Putative uncharacterized protein	Human Diseases;Human Diseases;Environmental Information Processing;Cellular Processes;Organismal Systems;Organismal Systems;Environmental Information Processing;Human Diseases;Human Diseases;Human Diseases	Cancers;Infectious diseases;Signal transduction;Cellular community - eukaryotes;Digestive system;Endocrine system;Signaling molecules and interaction;Infectious diseases;Endocrine and metabolic diseases;Cancers	ko05200//Pathways in cancer;ko05165//Human papillomavirus infection;ko04151//PI3K-Akt signaling pathway;ko04510//Focal adhesion;ko04974//Protein digestion and absorption;ko04926//Relaxin signaling pathway;ko04512//ECM-receptor interaction;ko05146//Amoebiasis;ko04933//AGE-RAGE signaling pathway in diabetic complications;ko05222//Small cell lung cancer	K06237;K06237;K06237;K06237;K06237;K06237;K06237;K06237;K06237;K06237	-	-	-
MSTRG.18098.3	Sfur015140	0.981314526	2.88E-06	--	Putative uncharacterized protein	Human Diseases;Human Diseases;Environmental Information Processing;Cellular Processes;Organismal Systems;Organismal Systems;Environmental Information Processing;Human Diseases;Human Diseases;Human Diseases	Cancers;Infectious diseases;Signal transduction;Cellular community - eukaryotes;Digestive system;Endocrine system;Signaling molecules and interaction;Infectious diseases;Endocrine and metabolic diseases;Cancers	ko05200//Pathways in cancer;ko05165//Human papillomavirus infection;ko04151//PI3K-Akt signaling pathway;ko04510//Focal adhesion;ko04974//Protein digestion and absorption;ko04926//Relaxin signaling pathway;ko04512//ECM-receptor interaction;ko05146//Amoebiasis;ko04933//AGE-RAGE signaling pathway in diabetic complications;ko05222//Small cell lung cancer	K06237;K06237;K06237;K06237;K06237;K06237;K06237;K06237;K06237;K06237	-	-	-
MSTRG.19109.1	Sfur015140	0.990640117	2.59E-07	--	Putative uncharacterized protein	Human Diseases;Human Diseases;Environmental Information Processing;Cellular Processes;Organismal Systems;Organismal Systems;Environmental Information Processing;Human Diseases;Human Diseases;Human Diseases	Cancers;Infectious diseases;Signal transduction;Cellular community - eukaryotes;Digestive system;Endocrine system;Signaling molecules and interaction;Infectious diseases;Endocrine and metabolic diseases;Cancers	ko05200//Pathways in cancer;ko05165//Human papillomavirus infection;ko04151//PI3K-Akt signaling pathway;ko04510//Focal adhesion;ko04974//Protein digestion and absorption;ko04926//Relaxin signaling pathway;ko04512//ECM-receptor interaction;ko05146//Amoebiasis;ko04933//AGE-RAGE signaling pathway in diabetic complications;ko05222//Small cell lung cancer	K06237;K06237;K06237;K06237;K06237;K06237;K06237;K06237;K06237;K06237	-	-	-
MSTRG.21259.5	Sfur015140	0.981840607	2.61E-06	--	Putative uncharacterized protein	Human Diseases;Human Diseases;Environmental Information Processing;Cellular Processes;Organismal Systems;Organismal Systems;Environmental Information Processing;Human Diseases;Human Diseases;Human Diseases	Cancers;Infectious diseases;Signal transduction;Cellular community - eukaryotes;Digestive system;Endocrine system;Signaling molecules and interaction;Infectious diseases;Endocrine and metabolic diseases;Cancers	ko05200//Pathways in cancer;ko05165//Human papillomavirus infection;ko04151//PI3K-Akt signaling pathway;ko04510//Focal adhesion;ko04974//Protein digestion and absorption;ko04926//Relaxin signaling pathway;ko04512//ECM-receptor interaction;ko05146//Amoebiasis;ko04933//AGE-RAGE signaling pathway in diabetic complications;ko05222//Small cell lung cancer	K06237;K06237;K06237;K06237;K06237;K06237;K06237;K06237;K06237;K06237	-	-	-
MSTRG.21483.1	Sfur015140	0.980917697	3.10E-06	--	Putative uncharacterized protein	Human Diseases;Human Diseases;Environmental Information Processing;Cellular Processes;Organismal Systems;Organismal Systems;Environmental Information Processing;Human Diseases;Human Diseases;Human Diseases	Cancers;Infectious diseases;Signal transduction;Cellular community - eukaryotes;Digestive system;Endocrine system;Signaling molecules and interaction;Infectious diseases;Endocrine and metabolic diseases;Cancers	ko05200//Pathways in cancer;ko05165//Human papillomavirus infection;ko04151//PI3K-Akt signaling pathway;ko04510//Focal adhesion;ko04974//Protein digestion and absorption;ko04926//Relaxin signaling pathway;ko04512//ECM-receptor interaction;ko05146//Amoebiasis;ko04933//AGE-RAGE signaling pathway in diabetic complications;ko05222//Small cell lung cancer	K06237;K06237;K06237;K06237;K06237;K06237;K06237;K06237;K06237;K06237	-	-	-
MSTRG.32068.1	Sfur015140	0.993615384	6.80E-08	--	Putative uncharacterized protein	Human Diseases;Human Diseases;Environmental Information Processing;Cellular Processes;Organismal Systems;Organismal Systems;Environmental Information Processing;Human Diseases;Human Diseases;Human Diseases	Cancers;Infectious diseases;Signal transduction;Cellular community - eukaryotes;Digestive system;Endocrine system;Signaling molecules and interaction;Infectious diseases;Endocrine and metabolic diseases;Cancers	ko05200//Pathways in cancer;ko05165//Human papillomavirus infection;ko04151//PI3K-Akt signaling pathway;ko04510//Focal adhesion;ko04974//Protein digestion and absorption;ko04926//Relaxin signaling pathway;ko04512//ECM-receptor interaction;ko05146//Amoebiasis;ko04933//AGE-RAGE signaling pathway in diabetic complications;ko05222//Small cell lung cancer	K06237;K06237;K06237;K06237;K06237;K06237;K06237;K06237;K06237;K06237	-	-	-
MSTRG.33279.1	Sfur015140	0.994422271	4.24E-08	--	Putative uncharacterized protein	Human Diseases;Human Diseases;Environmental Information Processing;Cellular Processes;Organismal Systems;Organismal Systems;Environmental Information Processing;Human Diseases;Human Diseases;Human Diseases	Cancers;Infectious diseases;Signal transduction;Cellular community - eukaryotes;Digestive system;Endocrine system;Signaling molecules and interaction;Infectious diseases;Endocrine and metabolic diseases;Cancers	ko05200//Pathways in cancer;ko05165//Human papillomavirus infection;ko04151//PI3K-Akt signaling pathway;ko04510//Focal adhesion;ko04974//Protein digestion and absorption;ko04926//Relaxin signaling pathway;ko04512//ECM-receptor interaction;ko05146//Amoebiasis;ko04933//AGE-RAGE signaling pathway in diabetic complications;ko05222//Small cell lung cancer	K06237;K06237;K06237;K06237;K06237;K06237;K06237;K06237;K06237;K06237	-	-	-
MSTRG.33772.1	Sfur015140	0.996376225	9.40E-09	--	Putative uncharacterized protein	Human Diseases;Human Diseases;Environmental Information Processing;Cellular Processes;Organismal Systems;Organismal Systems;Environmental Information Processing;Human Diseases;Human Diseases;Human Diseases	Cancers;Infectious diseases;Signal transduction;Cellular community - eukaryotes;Digestive system;Endocrine system;Signaling molecules and interaction;Infectious diseases;Endocrine and metabolic diseases;Cancers	ko05200//Pathways in cancer;ko05165//Human papillomavirus infection;ko04151//PI3K-Akt signaling pathway;ko04510//Focal adhesion;ko04974//Protein digestion and absorption;ko04926//Relaxin signaling pathway;ko04512//ECM-receptor interaction;ko05146//Amoebiasis;ko04933//AGE-RAGE signaling pathway in diabetic complications;ko05222//Small cell lung cancer	K06237;K06237;K06237;K06237;K06237;K06237;K06237;K06237;K06237;K06237	-	-	-
MSTRG.33773.1	Sfur015140	0.984535437	1.49E-06	--	Putative uncharacterized protein	Human Diseases;Human Diseases;Environmental Information Processing;Cellular Processes;Organismal Systems;Organismal Systems;Environmental Information Processing;Human Diseases;Human Diseases;Human Diseases	Cancers;Infectious diseases;Signal transduction;Cellular community - eukaryotes;Digestive system;Endocrine system;Signaling molecules and interaction;Infectious diseases;Endocrine and metabolic diseases;Cancers	ko05200//Pathways in cancer;ko05165//Human papillomavirus infection;ko04151//PI3K-Akt signaling pathway;ko04510//Focal adhesion;ko04974//Protein digestion and absorption;ko04926//Relaxin signaling pathway;ko04512//ECM-receptor interaction;ko05146//Amoebiasis;ko04933//AGE-RAGE signaling pathway in diabetic complications;ko05222//Small cell lung cancer	K06237;K06237;K06237;K06237;K06237;K06237;K06237;K06237;K06237;K06237	-	-	-
MSTRG.34229.1	Sfur015140	0.997057468	4.54E-09	--	Putative uncharacterized protein	Human Diseases;Human Diseases;Environmental Information Processing;Cellular Processes;Organismal Systems;Organismal Systems;Environmental Information Processing;Human Diseases;Human Diseases;Human Diseases	Cancers;Infectious diseases;Signal transduction;Cellular community - eukaryotes;Digestive system;Endocrine system;Signaling molecules and interaction;Infectious diseases;Endocrine and metabolic diseases;Cancers	ko05200//Pathways in cancer;ko05165//Human papillomavirus infection;ko04151//PI3K-Akt signaling pathway;ko04510//Focal adhesion;ko04974//Protein digestion and absorption;ko04926//Relaxin signaling pathway;ko04512//ECM-receptor interaction;ko05146//Amoebiasis;ko04933//AGE-RAGE signaling pathway in diabetic complications;ko05222//Small cell lung cancer	K06237;K06237;K06237;K06237;K06237;K06237;K06237;K06237;K06237;K06237	-	-	-
MSTRG.36087.1	Sfur015140	0.983910328	1.71E-06	--	Putative uncharacterized protein	Human Diseases;Human Diseases;Environmental Information Processing;Cellular Processes;Organismal Systems;Organismal Systems;Environmental Information Processing;Human Diseases;Human Diseases;Human Diseases	Cancers;Infectious diseases;Signal transduction;Cellular community - eukaryotes;Digestive system;Endocrine system;Signaling molecules and interaction;Infectious diseases;Endocrine and metabolic diseases;Cancers	ko05200//Pathways in cancer;ko05165//Human papillomavirus infection;ko04151//PI3K-Akt signaling pathway;ko04510//Focal adhesion;ko04974//Protein digestion and absorption;ko04926//Relaxin signaling pathway;ko04512//ECM-receptor interaction;ko05146//Amoebiasis;ko04933//AGE-RAGE signaling pathway in diabetic complications;ko05222//Small cell lung cancer	K06237;K06237;K06237;K06237;K06237;K06237;K06237;K06237;K06237;K06237	-	-	-
MSTRG.4917.1	Sfur015140	0.982520956	2.29E-06	--	Putative uncharacterized protein	Human Diseases;Human Diseases;Environmental Information Processing;Cellular Processes;Organismal Systems;Organismal Systems;Environmental Information Processing;Human Diseases;Human Diseases;Human Diseases	Cancers;Infectious diseases;Signal transduction;Cellular community - eukaryotes;Digestive system;Endocrine system;Signaling molecules and interaction;Infectious diseases;Endocrine and metabolic diseases;Cancers	ko05200//Pathways in cancer;ko05165//Human papillomavirus infection;ko04151//PI3K-Akt signaling pathway;ko04510//Focal adhesion;ko04974//Protein digestion and absorption;ko04926//Relaxin signaling pathway;ko04512//ECM-receptor interaction;ko05146//Amoebiasis;ko04933//AGE-RAGE signaling pathway in diabetic complications;ko05222//Small cell lung cancer	K06237;K06237;K06237;K06237;K06237;K06237;K06237;K06237;K06237;K06237	-	-	-
MSTRG.5073.2	Sfur015140	0.989585341	3.76E-07	--	Putative uncharacterized protein	Human Diseases;Human Diseases;Environmental Information Processing;Cellular Processes;Organismal Systems;Organismal Systems;Environmental Information Processing;Human Diseases;Human Diseases;Human Diseases	Cancers;Infectious diseases;Signal transduction;Cellular community - eukaryotes;Digestive system;Endocrine system;Signaling molecules and interaction;Infectious diseases;Endocrine and metabolic diseases;Cancers	ko05200//Pathways in cancer;ko05165//Human papillomavirus infection;ko04151//PI3K-Akt signaling pathway;ko04510//Focal adhesion;ko04974//Protein digestion and absorption;ko04926//Relaxin signaling pathway;ko04512//ECM-receptor interaction;ko05146//Amoebiasis;ko04933//AGE-RAGE signaling pathway in diabetic complications;ko05222//Small cell lung cancer	K06237;K06237;K06237;K06237;K06237;K06237;K06237;K06237;K06237;K06237	-	-	-
MSTRG.833.2	Sfur015140	0.984304752	1.57E-06	--	Putative uncharacterized protein	Human Diseases;Human Diseases;Environmental Information Processing;Cellular Processes;Organismal Systems;Organismal Systems;Environmental Information Processing;Human Diseases;Human Diseases;Human Diseases	Cancers;Infectious diseases;Signal transduction;Cellular community - eukaryotes;Digestive system;Endocrine system;Signaling molecules and interaction;Infectious diseases;Endocrine and metabolic diseases;Cancers	ko05200//Pathways in cancer;ko05165//Human papillomavirus infection;ko04151//PI3K-Akt signaling pathway;ko04510//Focal adhesion;ko04974//Protein digestion and absorption;ko04926//Relaxin signaling pathway;ko04512//ECM-receptor interaction;ko05146//Amoebiasis;ko04933//AGE-RAGE signaling pathway in diabetic complications;ko05222//Small cell lung cancer	K06237;K06237;K06237;K06237;K06237;K06237;K06237;K06237;K06237;K06237	-	-	-
MSTRG.8569.3	Sfur015140	0.986970333	8.21E-07	--	Putative uncharacterized protein	Human Diseases;Human Diseases;Environmental Information Processing;Cellular Processes;Organismal Systems;Organismal Systems;Environmental Information Processing;Human Diseases;Human Diseases;Human Diseases	Cancers;Infectious diseases;Signal transduction;Cellular community - eukaryotes;Digestive system;Endocrine system;Signaling molecules and interaction;Infectious diseases;Endocrine and metabolic diseases;Cancers	ko05200//Pathways in cancer;ko05165//Human papillomavirus infection;ko04151//PI3K-Akt signaling pathway;ko04510//Focal adhesion;ko04974//Protein digestion and absorption;ko04926//Relaxin signaling pathway;ko04512//ECM-receptor interaction;ko05146//Amoebiasis;ko04933//AGE-RAGE signaling pathway in diabetic complications;ko05222//Small cell lung cancer	K06237;K06237;K06237;K06237;K06237;K06237;K06237;K06237;K06237;K06237	-	-	-
MSTRG.10562.1	Sfur015366	0.994647098	3.68E-08	--	Putative uncharacterized protein	Organismal Systems;Organismal Systems;Organismal Systems;Human Diseases;Human Diseases	Digestive system;Immune system;Endocrine system;Infectious diseases;Endocrine and metabolic diseases	ko04974//Protein digestion and absorption;ko04611//Platelet activation;ko04926//Relaxin signaling pathway;ko05146//Amoebiasis;ko04933//AGE-RAGE signaling pathway in diabetic complications	K19720;K19720;K19720;K19720;K19720	-	-	-
MSTRG.11199.1	Sfur015366	0.996304766	1.01E-08	--	Putative uncharacterized protein	Organismal Systems;Organismal Systems;Organismal Systems;Human Diseases;Human Diseases	Digestive system;Immune system;Endocrine system;Infectious diseases;Endocrine and metabolic diseases	ko04974//Protein digestion and absorption;ko04611//Platelet activation;ko04926//Relaxin signaling pathway;ko05146//Amoebiasis;ko04933//AGE-RAGE signaling pathway in diabetic complications	K19720;K19720;K19720;K19720;K19720	-	-	-
MSTRG.11349.1	Sfur015366	0.989700695	3.61E-07	--	Putative uncharacterized protein	Organismal Systems;Organismal Systems;Organismal Systems;Human Diseases;Human Diseases	Digestive system;Immune system;Endocrine system;Infectious diseases;Endocrine and metabolic diseases	ko04974//Protein digestion and absorption;ko04611//Platelet activation;ko04926//Relaxin signaling pathway;ko05146//Amoebiasis;ko04933//AGE-RAGE signaling pathway in diabetic complications	K19720;K19720;K19720;K19720;K19720	-	-	-
MSTRG.122.1	Sfur015366	0.990308451	2.92E-07	--	Putative uncharacterized protein	Organismal Systems;Organismal Systems;Organismal Systems;Human Diseases;Human Diseases	Digestive system;Immune system;Endocrine system;Infectious diseases;Endocrine and metabolic diseases	ko04974//Protein digestion and absorption;ko04611//Platelet activation;ko04926//Relaxin signaling pathway;ko05146//Amoebiasis;ko04933//AGE-RAGE signaling pathway in diabetic complications	K19720;K19720;K19720;K19720;K19720	-	-	-
MSTRG.12968.2	Sfur015366	0.991138544	2.14E-07	--	Putative uncharacterized protein	Organismal Systems;Organismal Systems;Organismal Systems;Human Diseases;Human Diseases	Digestive system;Immune system;Endocrine system;Infectious diseases;Endocrine and metabolic diseases	ko04974//Protein digestion and absorption;ko04611//Platelet activation;ko04926//Relaxin signaling pathway;ko05146//Amoebiasis;ko04933//AGE-RAGE signaling pathway in diabetic complications	K19720;K19720;K19720;K19720;K19720	-	-	-
MSTRG.14134.1	Sfur015366	0.983067129	2.05E-06	--	Putative uncharacterized protein	Organismal Systems;Organismal Systems;Organismal Systems;Human Diseases;Human Diseases	Digestive system;Immune system;Endocrine system;Infectious diseases;Endocrine and metabolic diseases	ko04974//Protein digestion and absorption;ko04611//Platelet activation;ko04926//Relaxin signaling pathway;ko05146//Amoebiasis;ko04933//AGE-RAGE signaling pathway in diabetic complications	K19720;K19720;K19720;K19720;K19720	-	-	-
MSTRG.15684.1	Sfur015366	0.982958595	2.09E-06	--	Putative uncharacterized protein	Organismal Systems;Organismal Systems;Organismal Systems;Human Diseases;Human Diseases	Digestive system;Immune system;Endocrine system;Infectious diseases;Endocrine and metabolic diseases	ko04974//Protein digestion and absorption;ko04611//Platelet activation;ko04926//Relaxin signaling pathway;ko05146//Amoebiasis;ko04933//AGE-RAGE signaling pathway in diabetic complications	K19720;K19720;K19720;K19720;K19720	-	-	-
MSTRG.15726.1	Sfur015366	0.980750204	3.20E-06	--	Putative uncharacterized protein	Organismal Systems;Organismal Systems;Organismal Systems;Human Diseases;Human Diseases	Digestive system;Immune system;Endocrine system;Infectious diseases;Endocrine and metabolic diseases	ko04974//Protein digestion and absorption;ko04611//Platelet activation;ko04926//Relaxin signaling pathway;ko05146//Amoebiasis;ko04933//AGE-RAGE signaling pathway in diabetic complications	K19720;K19720;K19720;K19720;K19720	-	-	-
MSTRG.16086.1	Sfur015366	0.991986765	1.50E-07	--	Putative uncharacterized protein	Organismal Systems;Organismal Systems;Organismal Systems;Human Diseases;Human Diseases	Digestive system;Immune system;Endocrine system;Infectious diseases;Endocrine and metabolic diseases	ko04974//Protein digestion and absorption;ko04611//Platelet activation;ko04926//Relaxin signaling pathway;ko05146//Amoebiasis;ko04933//AGE-RAGE signaling pathway in diabetic complications	K19720;K19720;K19720;K19720;K19720	-	-	-
MSTRG.16087.1	Sfur015366	0.993700612	6.49E-08	--	Putative uncharacterized protein	Organismal Systems;Organismal Systems;Organismal Systems;Human Diseases;Human Diseases	Digestive system;Immune system;Endocrine system;Infectious diseases;Endocrine and metabolic diseases	ko04974//Protein digestion and absorption;ko04611//Platelet activation;ko04926//Relaxin signaling pathway;ko05146//Amoebiasis;ko04933//AGE-RAGE signaling pathway in diabetic complications	K19720;K19720;K19720;K19720;K19720	-	-	-
MSTRG.18635.5	Sfur015366	0.983287264	1.95E-06	--	Putative uncharacterized protein	Organismal Systems;Organismal Systems;Organismal Systems;Human Diseases;Human Diseases	Digestive system;Immune system;Endocrine system;Infectious diseases;Endocrine and metabolic diseases	ko04974//Protein digestion and absorption;ko04611//Platelet activation;ko04926//Relaxin signaling pathway;ko05146//Amoebiasis;ko04933//AGE-RAGE signaling pathway in diabetic complications	K19720;K19720;K19720;K19720;K19720	-	-	-
MSTRG.20058.1	Sfur015366	0.987836451	6.46E-07	--	Putative uncharacterized protein	Organismal Systems;Organismal Systems;Organismal Systems;Human Diseases;Human Diseases	Digestive system;Immune system;Endocrine system;Infectious diseases;Endocrine and metabolic diseases	ko04974//Protein digestion and absorption;ko04611//Platelet activation;ko04926//Relaxin signaling pathway;ko05146//Amoebiasis;ko04933//AGE-RAGE signaling pathway in diabetic complications	K19720;K19720;K19720;K19720;K19720	-	-	-
MSTRG.20188.1	Sfur015366	0.986027388	1.05E-06	--	Putative uncharacterized protein	Organismal Systems;Organismal Systems;Organismal Systems;Human Diseases;Human Diseases	Digestive system;Immune system;Endocrine system;Infectious diseases;Endocrine and metabolic diseases	ko04974//Protein digestion and absorption;ko04611//Platelet activation;ko04926//Relaxin signaling pathway;ko05146//Amoebiasis;ko04933//AGE-RAGE signaling pathway in diabetic complications	K19720;K19720;K19720;K19720;K19720	-	-	-
MSTRG.21272.1	Sfur015366	0.985404253	1.22E-06	--	Putative uncharacterized protein	Organismal Systems;Organismal Systems;Organismal Systems;Human Diseases;Human Diseases	Digestive system;Immune system;Endocrine system;Infectious diseases;Endocrine and metabolic diseases	ko04974//Protein digestion and absorption;ko04611//Platelet activation;ko04926//Relaxin signaling pathway;ko05146//Amoebiasis;ko04933//AGE-RAGE signaling pathway in diabetic complications	K19720;K19720;K19720;K19720;K19720	-	-	-
MSTRG.22706.3	Sfur015366	0.982481736	2.30E-06	--	Putative uncharacterized protein	Organismal Systems;Organismal Systems;Organismal Systems;Human Diseases;Human Diseases	Digestive system;Immune system;Endocrine system;Infectious diseases;Endocrine and metabolic diseases	ko04974//Protein digestion and absorption;ko04611//Platelet activation;ko04926//Relaxin signaling pathway;ko05146//Amoebiasis;ko04933//AGE-RAGE signaling pathway in diabetic complications	K19720;K19720;K19720;K19720;K19720	-	-	-
MSTRG.22908.1	Sfur015366	0.982976398	2.08E-06	--	Putative uncharacterized protein	Organismal Systems;Organismal Systems;Organismal Systems;Human Diseases;Human Diseases	Digestive system;Immune system;Endocrine system;Infectious diseases;Endocrine and metabolic diseases	ko04974//Protein digestion and absorption;ko04611//Platelet activation;ko04926//Relaxin signaling pathway;ko05146//Amoebiasis;ko04933//AGE-RAGE signaling pathway in diabetic complications	K19720;K19720;K19720;K19720;K19720	-	-	-
MSTRG.23212.1	Sfur015366	-0.98050372	3.34E-06	--	Putative uncharacterized protein	Organismal Systems;Organismal Systems;Organismal Systems;Human Diseases;Human Diseases	Digestive system;Immune system;Endocrine system;Infectious diseases;Endocrine and metabolic diseases	ko04974//Protein digestion and absorption;ko04611//Platelet activation;ko04926//Relaxin signaling pathway;ko05146//Amoebiasis;ko04933//AGE-RAGE signaling pathway in diabetic complications	K19720;K19720;K19720;K19720;K19720	-	-	-
MSTRG.24164.3	Sfur015366	0.991174133	2.11E-07	--	Putative uncharacterized protein	Organismal Systems;Organismal Systems;Organismal Systems;Human Diseases;Human Diseases	Digestive system;Immune system;Endocrine system;Infectious diseases;Endocrine and metabolic diseases	ko04974//Protein digestion and absorption;ko04611//Platelet activation;ko04926//Relaxin signaling pathway;ko05146//Amoebiasis;ko04933//AGE-RAGE signaling pathway in diabetic complications	K19720;K19720;K19720;K19720;K19720	-	-	-
MSTRG.2447.1	Sfur015366	0.988372836	5.52E-07	--	Putative uncharacterized protein	Organismal Systems;Organismal Systems;Organismal Systems;Human Diseases;Human Diseases	Digestive system;Immune system;Endocrine system;Infectious diseases;Endocrine and metabolic diseases	ko04974//Protein digestion and absorption;ko04611//Platelet activation;ko04926//Relaxin signaling pathway;ko05146//Amoebiasis;ko04933//AGE-RAGE signaling pathway in diabetic complications	K19720;K19720;K19720;K19720;K19720	-	-	-
MSTRG.25057.1	Sfur015366	0.982109229	2.48E-06	--	Putative uncharacterized protein	Organismal Systems;Organismal Systems;Organismal Systems;Human Diseases;Human Diseases	Digestive system;Immune system;Endocrine system;Infectious diseases;Endocrine and metabolic diseases	ko04974//Protein digestion and absorption;ko04611//Platelet activation;ko04926//Relaxin signaling pathway;ko05146//Amoebiasis;ko04933//AGE-RAGE signaling pathway in diabetic complications	K19720;K19720;K19720;K19720;K19720	-	-	-
MSTRG.25629.14	Sfur015366	0.986032337	1.05E-06	--	Putative uncharacterized protein	Organismal Systems;Organismal Systems;Organismal Systems;Human Diseases;Human Diseases	Digestive system;Immune system;Endocrine system;Infectious diseases;Endocrine and metabolic diseases	ko04974//Protein digestion and absorption;ko04611//Platelet activation;ko04926//Relaxin signaling pathway;ko05146//Amoebiasis;ko04933//AGE-RAGE signaling pathway in diabetic complications	K19720;K19720;K19720;K19720;K19720	-	-	-
MSTRG.27249.1	Sfur015366	0.988023348	6.12E-07	--	Putative uncharacterized protein	Organismal Systems;Organismal Systems;Organismal Systems;Human Diseases;Human Diseases	Digestive system;Immune system;Endocrine system;Infectious diseases;Endocrine and metabolic diseases	ko04974//Protein digestion and absorption;ko04611//Platelet activation;ko04926//Relaxin signaling pathway;ko05146//Amoebiasis;ko04933//AGE-RAGE signaling pathway in diabetic complications	K19720;K19720;K19720;K19720;K19720	-	-	-
MSTRG.29822.3	Sfur015366	0.994150321	5.01E-08	--	Putative uncharacterized protein	Organismal Systems;Organismal Systems;Organismal Systems;Human Diseases;Human Diseases	Digestive system;Immune system;Endocrine system;Infectious diseases;Endocrine and metabolic diseases	ko04974//Protein digestion and absorption;ko04611//Platelet activation;ko04926//Relaxin signaling pathway;ko05146//Amoebiasis;ko04933//AGE-RAGE signaling pathway in diabetic complications	K19720;K19720;K19720;K19720;K19720	-	-	-
MSTRG.31005.1	Sfur015366	0.987203147	7.71E-07	--	Putative uncharacterized protein	Organismal Systems;Organismal Systems;Organismal Systems;Human Diseases;Human Diseases	Digestive system;Immune system;Endocrine system;Infectious diseases;Endocrine and metabolic diseases	ko04974//Protein digestion and absorption;ko04611//Platelet activation;ko04926//Relaxin signaling pathway;ko05146//Amoebiasis;ko04933//AGE-RAGE signaling pathway in diabetic complications	K19720;K19720;K19720;K19720;K19720	-	-	-
MSTRG.32060.1	Sfur015366	0.989425113	3.96E-07	--	Putative uncharacterized protein	Organismal Systems;Organismal Systems;Organismal Systems;Human Diseases;Human Diseases	Digestive system;Immune system;Endocrine system;Infectious diseases;Endocrine and metabolic diseases	ko04974//Protein digestion and absorption;ko04611//Platelet activation;ko04926//Relaxin signaling pathway;ko05146//Amoebiasis;ko04933//AGE-RAGE signaling pathway in diabetic complications	K19720;K19720;K19720;K19720;K19720	-	-	-
MSTRG.32766.1	Sfur015366	0.99528203	2.36E-08	--	Putative uncharacterized protein	Organismal Systems;Organismal Systems;Organismal Systems;Human Diseases;Human Diseases	Digestive system;Immune system;Endocrine system;Infectious diseases;Endocrine and metabolic diseases	ko04974//Protein digestion and absorption;ko04611//Platelet activation;ko04926//Relaxin signaling pathway;ko05146//Amoebiasis;ko04933//AGE-RAGE signaling pathway in diabetic complications	K19720;K19720;K19720;K19720;K19720	-	-	-
MSTRG.33771.1	Sfur015366	0.986867052	8.44E-07	--	Putative uncharacterized protein	Organismal Systems;Organismal Systems;Organismal Systems;Human Diseases;Human Diseases	Digestive system;Immune system;Endocrine system;Infectious diseases;Endocrine and metabolic diseases	ko04974//Protein digestion and absorption;ko04611//Platelet activation;ko04926//Relaxin signaling pathway;ko05146//Amoebiasis;ko04933//AGE-RAGE signaling pathway in diabetic complications	K19720;K19720;K19720;K19720;K19720	-	-	-
MSTRG.33855.2	Sfur015366	0.984521897	1.50E-06	--	Putative uncharacterized protein	Organismal Systems;Organismal Systems;Organismal Systems;Human Diseases;Human Diseases	Digestive system;Immune system;Endocrine system;Infectious diseases;Endocrine and metabolic diseases	ko04974//Protein digestion and absorption;ko04611//Platelet activation;ko04926//Relaxin signaling pathway;ko05146//Amoebiasis;ko04933//AGE-RAGE signaling pathway in diabetic complications	K19720;K19720;K19720;K19720;K19720	-	-	-
MSTRG.34473.3	Sfur015366	0.985635732	1.15E-06	--	Putative uncharacterized protein	Organismal Systems;Organismal Systems;Organismal Systems;Human Diseases;Human Diseases	Digestive system;Immune system;Endocrine system;Infectious diseases;Endocrine and metabolic diseases	ko04974//Protein digestion and absorption;ko04611//Platelet activation;ko04926//Relaxin signaling pathway;ko05146//Amoebiasis;ko04933//AGE-RAGE signaling pathway in diabetic complications	K19720;K19720;K19720;K19720;K19720	-	-	-
MSTRG.34474.2	Sfur015366	0.989789147	3.51E-07	--	Putative uncharacterized protein	Organismal Systems;Organismal Systems;Organismal Systems;Human Diseases;Human Diseases	Digestive system;Immune system;Endocrine system;Infectious diseases;Endocrine and metabolic diseases	ko04974//Protein digestion and absorption;ko04611//Platelet activation;ko04926//Relaxin signaling pathway;ko05146//Amoebiasis;ko04933//AGE-RAGE signaling pathway in diabetic complications	K19720;K19720;K19720;K19720;K19720	-	-	-
MSTRG.36087.1	Sfur015366	0.981339962	2.87E-06	--	Putative uncharacterized protein	Organismal Systems;Organismal Systems;Organismal Systems;Human Diseases;Human Diseases	Digestive system;Immune system;Endocrine system;Infectious diseases;Endocrine and metabolic diseases	ko04974//Protein digestion and absorption;ko04611//Platelet activation;ko04926//Relaxin signaling pathway;ko05146//Amoebiasis;ko04933//AGE-RAGE signaling pathway in diabetic complications	K19720;K19720;K19720;K19720;K19720	-	-	-
MSTRG.37207.2	Sfur015366	0.985493871	1.19E-06	--	Putative uncharacterized protein	Organismal Systems;Organismal Systems;Organismal Systems;Human Diseases;Human Diseases	Digestive system;Immune system;Endocrine system;Infectious diseases;Endocrine and metabolic diseases	ko04974//Protein digestion and absorption;ko04611//Platelet activation;ko04926//Relaxin signaling pathway;ko05146//Amoebiasis;ko04933//AGE-RAGE signaling pathway in diabetic complications	K19720;K19720;K19720;K19720;K19720	-	-	-
MSTRG.38291.5	Sfur015366	0.983551445	1.85E-06	--	Putative uncharacterized protein	Organismal Systems;Organismal Systems;Organismal Systems;Human Diseases;Human Diseases	Digestive system;Immune system;Endocrine system;Infectious diseases;Endocrine and metabolic diseases	ko04974//Protein digestion and absorption;ko04611//Platelet activation;ko04926//Relaxin signaling pathway;ko05146//Amoebiasis;ko04933//AGE-RAGE signaling pathway in diabetic complications	K19720;K19720;K19720;K19720;K19720	-	-	-
MSTRG.39215.1	Sfur015366	0.995120329	2.66E-08	--	Putative uncharacterized protein	Organismal Systems;Organismal Systems;Organismal Systems;Human Diseases;Human Diseases	Digestive system;Immune system;Endocrine system;Infectious diseases;Endocrine and metabolic diseases	ko04974//Protein digestion and absorption;ko04611//Platelet activation;ko04926//Relaxin signaling pathway;ko05146//Amoebiasis;ko04933//AGE-RAGE signaling pathway in diabetic complications	K19720;K19720;K19720;K19720;K19720	-	-	-
MSTRG.39924.1	Sfur015366	0.99130577	2.00E-07	--	Putative uncharacterized protein	Organismal Systems;Organismal Systems;Organismal Systems;Human Diseases;Human Diseases	Digestive system;Immune system;Endocrine system;Infectious diseases;Endocrine and metabolic diseases	ko04974//Protein digestion and absorption;ko04611//Platelet activation;ko04926//Relaxin signaling pathway;ko05146//Amoebiasis;ko04933//AGE-RAGE signaling pathway in diabetic complications	K19720;K19720;K19720;K19720;K19720	-	-	-
MSTRG.4870.1	Sfur015366	0.981226918	2.93E-06	--	Putative uncharacterized protein	Organismal Systems;Organismal Systems;Organismal Systems;Human Diseases;Human Diseases	Digestive system;Immune system;Endocrine system;Infectious diseases;Endocrine and metabolic diseases	ko04974//Protein digestion and absorption;ko04611//Platelet activation;ko04926//Relaxin signaling pathway;ko05146//Amoebiasis;ko04933//AGE-RAGE signaling pathway in diabetic complications	K19720;K19720;K19720;K19720;K19720	-	-	-
MSTRG.5073.1	Sfur015366	0.98620471	1.00E-06	--	Putative uncharacterized protein	Organismal Systems;Organismal Systems;Organismal Systems;Human Diseases;Human Diseases	Digestive system;Immune system;Endocrine system;Infectious diseases;Endocrine and metabolic diseases	ko04974//Protein digestion and absorption;ko04611//Platelet activation;ko04926//Relaxin signaling pathway;ko05146//Amoebiasis;ko04933//AGE-RAGE signaling pathway in diabetic complications	K19720;K19720;K19720;K19720;K19720	-	-	-
MSTRG.8295.1	Sfur015366	0.991201087	2.09E-07	--	Putative uncharacterized protein	Organismal Systems;Organismal Systems;Organismal Systems;Human Diseases;Human Diseases	Digestive system;Immune system;Endocrine system;Infectious diseases;Endocrine and metabolic diseases	ko04974//Protein digestion and absorption;ko04611//Platelet activation;ko04926//Relaxin signaling pathway;ko05146//Amoebiasis;ko04933//AGE-RAGE signaling pathway in diabetic complications	K19720;K19720;K19720;K19720;K19720	-	-	-
MSTRG.8569.4	Sfur015366	0.989830441	3.46E-07	--	Putative uncharacterized protein	Organismal Systems;Organismal Systems;Organismal Systems;Human Diseases;Human Diseases	Digestive system;Immune system;Endocrine system;Infectious diseases;Endocrine and metabolic diseases	ko04974//Protein digestion and absorption;ko04611//Platelet activation;ko04926//Relaxin signaling pathway;ko05146//Amoebiasis;ko04933//AGE-RAGE signaling pathway in diabetic complications	K19720;K19720;K19720;K19720;K19720	-	-	-
