# Supplementary material for: Interaction Analysis of lncRNA and mRNA Based on the Full-Length Transcriptome of the Nymph-to-Adult Developmental Transition of Sogatella furcifera
Source: Insects. 2023 Mar 23;14(4):308. doi: 10.3390/insects14040308 (PMC10141146; doi:10.3390/insects14040308)
Supplement: Supplementary file 1 [file insects-14-00308-s001.zip › Table S7. Prediction of the target genes of different lncRNAs..xlsx]

## Sheet: PE-vs-DE cis and trans
PE-vs-DE cis and trans target gene			PE-vs-DE trans target gene
Gene id	Description		id	Description
MSTRG.11202	hypothetical protein LSTR_LSTR012958 [Laodelphax striatellus]		MSTRG.10194	gustatory receptor for sugar taste 43a-like [Nilaparvata lugens]
MSTRG.11683	-		MSTRG.10266	hypothetical protein LSTR_LSTR011731 [Laodelphax striatellus]
MSTRG.11948	hypothetical protein LSTR_LSTR012773 [Laodelphax striatellus]		MSTRG.10374	zinc finger protein 2 homolog [Nilaparvata lugens]
MSTRG.11949	hypothetical protein LSTR_LSTR012773 [Laodelphax striatellus]		MSTRG.10445	PREDICTED: myosin heavy chain, muscle-like [Fopius arisanus]
MSTRG.12188	hormone-sensitive lipase isoform X1 [Nilaparvata lugens]		MSTRG.10534	katanin p80 WD40 repeat-containing subunit B1-like [Nilaparvata lugens]
MSTRG.12189	hormone-sensitive lipase isoform X1 [Nilaparvata lugens]		MSTRG.10535	katanin p80 WD40 repeat-containing subunit B1-like [Nilaparvata lugens]
MSTRG.12403	odorant-binding protein 3 [Sogatella furcifera]		MSTRG.10536	guanine nucleotide-binding protein subunit beta-like protein [Nilaparvata lugens]
MSTRG.12404	odorant-binding protein 3 [Sogatella furcifera]		MSTRG.10543	dentin sialophosphoprotein-like [Nilaparvata lugens]
MSTRG.13226	titin-like [Leptinotarsa decemlineata]		MSTRG.10603	CKLF-like MARVEL transmembrane domain-containing protein 8 [Nilaparvata lugens]
MSTRG.13228	uncharacterized protein LOC111054247 [Nilaparvata lugens]		MSTRG.10604	dynamin-1-like protein [Nilaparvata lugens]
MSTRG.13229	loricrin-like [Nilaparvata lugens]		MSTRG.10770	cuticle protein 19-like, partial [Nilaparvata lugens]
MSTRG.13233	loricrin-like [Nilaparvata lugens]		MSTRG.10771	cuticle protein 19-like, partial [Nilaparvata lugens]
MSTRG.13239	titin-like [Leptinotarsa decemlineata]		MSTRG.10791	microtubule-associated protein futsch-like isoform X2 [Odontomachus brunneus]
MSTRG.13399	-		MSTRG.10792	hypothetical protein LSTR_LSTR006021 [Laodelphax striatellus]
MSTRG.14617	ran-specific GTPase-activating protein-like [Nilaparvata lugens]		MSTRG.10826	Huntingtin-interacting protein 1-related protein [Collichthys lucidus]
MSTRG.14666	dolichyl-diphosphooligosaccharide--protein glycosyltransferase subunit STT3A-like [Nilaparvata lugens]		MSTRG.10845	myofilin isoform a [Acyrthosiphon pisum]
MSTRG.14977	-		MSTRG.10902	interference hedgehog-like [Nilaparvata lugens]
MSTRG.14978	-		MSTRG.10909	hypothetical protein LSTR_LSTR006052 [Laodelphax striatellus]
MSTRG.15395	reticulophagy regulator 3-like [Cryptotermes secundus]		MSTRG.10939	Phosphonates-binding periplasmic protein [Papilio xuthus]
MSTRG.16085	microtubule-associated protein RP/EB family member 3 isoform X2 [Nilaparvata lugens]		MSTRG.11117	cuticular protein [Nilaparvata lugens]
MSTRG.1901	coiled-coil domain-containing protein 77-like isoform X1 [Nilaparvata lugens]		MSTRG.11348	hypothetical protein LSTR_LSTR003103 [Laodelphax striatellus]
MSTRG.19035	rho GTPase-activating protein 39 [Petromyzon marinus]		MSTRG.11359	hypothetical protein LSTR_LSTR003103 [Laodelphax striatellus]
MSTRG.19037	-		MSTRG.11365	hypothetical protein LSTR_LSTR003104 [Laodelphax striatellus]
MSTRG.19039	-		MSTRG.11501	insulin-like growth factor 1 receptor [Nilaparvata lugens]
MSTRG.19234	neuropeptide-like protein 31 [Nilaparvata lugens]		MSTRG.11711	symplekin [Cryptotermes secundus]
MSTRG.20056	keratin, type I cytoskeletal 9-like isoform X3 [Nilaparvata lugens]		MSTRG.11734	mucin-5AC-like [Frankliniella occidentalis]
MSTRG.20504	-		MSTRG.1174	G kinase-anchoring protein 1-like [Nilaparvata lugens]
MSTRG.20533	monocarboxylate transporter 12 [Cephus cinctus]		MSTRG.11760	cytochrome P450 CYP439A3 [Sogatella furcifera]
MSTRG.22969	E3 ubiquitin-protein ligase CBL-B-like [Nilaparvata lugens]		MSTRG.11919	cuticle protein 19 [Nilaparvata lugens]
MSTRG.24156	pantothenate kinase 3-like isoform X2 [Nilaparvata lugens]		MSTRG.11920	cuticle protein 19 [Nilaparvata lugens]
MSTRG.24157	pantothenate kinase 3-like isoform X2 [Nilaparvata lugens]		MSTRG.11946	membrane-associated guanylate kinase, WW and PDZ domain-containing protein 3-like [Aphis gossypii]
MSTRG.24261	tubulin [Laodelphax striatellus]		MSTRG.11950	sodium channel protein Nach-like [Nilaparvata lugens]
MSTRG.24264	BCL2/adenovirus E1B 19 kDa protein-interacting protein 3 [Nilaparvata lugens]		MSTRG.11960	hypothetical protein LSTR_LSTR012765 [Laodelphax striatellus]
MSTRG.25434	GATA zinc finger domain-containing protein 14-like, partial [Nilaparvata lugens]		MSTRG.12042	cuticle protein 7-like [Nilaparvata lugens]
MSTRG.26681	O-acyltransferase like protein-like isoform X6 [Zootermopsis nevadensis]		MSTRG.12043	cuticle protein 7-like [Nilaparvata lugens]
MSTRG.27247	flap endonuclease 1 [Nilaparvata lugens]		MSTRG.12131	unkown protein [Riptortus pedestris]
MSTRG.27251	galectin-4-like [Nilaparvata lugens]		MSTRG.12161	hypothetical protein LSTR_LSTR006933 [Laodelphax striatellus]
MSTRG.27265	uncharacterized protein LOC111051698 [Nilaparvata lugens]		MSTRG.12168	DNA ligase 1-like [Nilaparvata lugens]
MSTRG.28015	dorsal, partial [Sogatella furcifera]		MSTRG.12228	breast cancer type 1 susceptibility protein homolog [Nilaparvata lugens]
MSTRG.28833	hypothetical protein LSTR_LSTR008711 [Laodelphax striatellus]		MSTRG.12312	trichohyalin-like, partial [Nilaparvata lugens]
MSTRG.28836	-		MSTRG.12401	odorant binding protein 2 [Sogatella furcifera]
MSTRG.28837	-		MSTRG.12434	hypothetical protein LSTR_LSTR007778 [Laodelphax striatellus]
MSTRG.29319	hypothetical protein LSTR_LSTR008711 [Laodelphax striatellus]		MSTRG.12472	pollen-specific leucine-rich repeat extensin-like protein 1 [Rhopalosiphum maidis]
MSTRG.29743	low choriolytic enzyme [Nilaparvata lugens]		MSTRG.12496	fibroin heavy chain-like isoform X1 [Leptinotarsa decemlineata]
MSTRG.31762	-		MSTRG.12501	pollen-specific leucine-rich repeat extensin-like protein 2 [Nilaparvata lugens]
MSTRG.31942	hypothetical protein LSTR_LSTR001772 [Laodelphax striatellus]		MSTRG.12502	pollen-specific leucine-rich repeat extensin-like protein 2 [Nilaparvata lugens]
MSTRG.32059	histidine-rich glycoprotein-like [Nilaparvata lugens]		MSTRG.12704	outer dense fiber protein 3-like isoform X1 [Cryptotermes secundus]
MSTRG.32168	PREDICTED: SEC14 domain and spectrin repeat-containing protein 1-B [Bemisia tabaci]		MSTRG.12731	ETS homologous factor-like isoform X2 [Nilaparvata lugens]
MSTRG.32271	proton-coupled amino acid transporter-like protein CG1139 [Nilaparvata lugens]		MSTRG.12782	nose resistant to fluoxetine protein 6-like [Nilaparvata lugens]
MSTRG.32769	cuticle protein 8 [Nilaparvata lugens]		MSTRG.12820	fructose-bisphosphate aldolase-like isoform X2 [Nilaparvata lugens]
MSTRG.32773	cuticle protein 7-like [Nilaparvata lugens]		MSTRG.12849	otopetrin-2-like [Nilaparvata lugens]
MSTRG.32778	cuticle protein 7-like [Nilaparvata lugens]		MSTRG.12928	hypothetical protein LSTR_LSTR003169 [Laodelphax striatellus]
MSTRG.33278	cuticular protein [Nilaparvata lugens]		MSTRG.12929	tetraspanin-11-like [Nilaparvata lugens]
MSTRG.33770	cuticular protein [Nilaparvata lugens]		MSTRG.1295	caskin-1 isoform X4 [Nilaparvata lugens]
MSTRG.33856	N-glycosylase/DNA lyase isoform X2 [Zootermopsis nevadensis]		MSTRG.13050	ras guanine nucleotide exchange factor e [Lasius niger]
MSTRG.39157	-		MSTRG.13082	uracil phosphoribosyltransferase homolog [Nilaparvata lugens]
MSTRG.4305	cGMP-dependent protein kinase, isozyme 2 forms cD4/T1/T3A/T3B isoform X1 [Zootermopsis nevadensis]		MSTRG.13167	pyrokinin [Nilaparvata lugens]
Sfur000028	N(4)-(Beta-N-acetylglucosaminyl)-L-asparaginase (Fragment)		MSTRG.13171	gamma-glutamylcyclotransferase-like [Nilaparvata lugens]
Sfur000060	Putative uncharacterized protein		MSTRG.13192	aldose 1-epimerase-like [Nilaparvata lugens]
Sfur000115	Putative uncharacterized protein		MSTRG.13237	loricrin-like [Nilaparvata lugens]
Sfur000156	Sterile alpha motif domain-containing protein 15		MSTRG.13338	thymidylate synthase [Nilaparvata lugens]
Sfur000424	Cystinosin homolog		MSTRG.13341	ethanolamine kinase 1-like [Nilaparvata lugens]
Sfur000550	Probable cytochrome P450 CYP44		MSTRG.13342	ethanolamine kinase 1-like [Nilaparvata lugens]
Sfur000572	Protein disulfide-isomerase A5		MSTRG.13390	loricrin-like [Nilaparvata lugens]
Sfur000631	Spaetzle-processing enzyme		MSTRG.13398	fibroin heavy chain isoform X2 [Aedes albopictus]
Sfur000712	Peroxisomal membrane protein 11C		MSTRG.1341	cyclic AMP-dependent transcription factor ATF-6 alpha isoform X2 [Nilaparvata lugens]
Sfur000838	Sodium-independent sulfate anion transporter		MSTRG.13417	retinol dehydrogenase 11 [Nilaparvata lugens]
Sfur000881	Lipase 1		MSTRG.13565	nose resistant to fluoxetine protein 6-like isoform X1 [Nilaparvata lugens]
Sfur000996	Putative uncharacterized protein		MSTRG.13643	nose resistant to fluoxetine protein 6-like [Nilaparvata lugens]
Sfur001080	Peptidyl-prolyl cis-trans isomerase G		MSTRG.13644	nose resistant to fluoxetine protein 6-like [Nilaparvata lugens]
Sfur001170	Intraflagellar transport protein 27 homolog		MSTRG.13655	-
Sfur001302	Putative uncharacterized protein		MSTRG.13855	hypothetical protein LSTR_LSTR007972 [Laodelphax striatellus]
Sfur001481	O-acyltransferase like protein		MSTRG.14007	GATA zinc finger domain-containing protein 14-like [Nilaparvata lugens]
Sfur001626	Putative uncharacterized protein		MSTRG.14063	cyclic nucleotide-gated cation channel beta-3-like, partial [Nilaparvata lugens]
Sfur001639	RIB43A-like with coiled-coils protein 2		MSTRG.14199	fatty acid elongase [Nilaparvata lugens]
Sfur002079	Neurabin-1		MSTRG.14238	uncharacterized protein LOC111044506 [Nilaparvata lugens]
Sfur002163	Protein borderless		MSTRG.14288	uncharacterized protein LOC111050574 [Nilaparvata lugens]
Sfur002387	Putative inorganic phosphate cotransporter		MSTRG.1449	uncharacterized SDCCAG3 family protein-like [Nilaparvata lugens]
Sfur002399	Putative uncharacterized protein		MSTRG.14537	fatty acid elongase [Nilaparvata lugens]
Sfur002532	Putative uncharacterized protein		MSTRG.14565	circadian clock-controlled protein-like, partial [Nilaparvata lugens]
Sfur002602	Putative uncharacterized protein		MSTRG.14567	hypothetical protein LSTR_LSTR005957 [Laodelphax striatellus]
Sfur003398	Corrinoid adenosyltransferase		MSTRG.14605	adenosine deaminase-like isoform X2 [Nilaparvata lugens]
Sfur003483	Nuclear receptor-binding protein homolog		MSTRG.14614	cuticular protein [Nilaparvata lugens]
Sfur003853	Putative uncharacterized protein		MSTRG.14615	cuticular protein [Nilaparvata lugens]
Sfur003978	Pseudouridine-5'-phosphatase		MSTRG.14692	stromelysin-2-like [Nilaparvata lugens]
Sfur004160	BPTI/Kunitz domain-containing protein (Fragment)		MSTRG.14795	paternally-expressed gene 3 protein-like [Nilaparvata lugens]
Sfur004626	Putative uncharacterized protein		MSTRG.14807	SWEET sugar transporter [Nilaparvata lugens]
Sfur004680	Putative uncharacterized protein		MSTRG.14814	solute carrier family 2, facilitated glucose transporter member 1-like [Nilaparvata lugens]
Sfur004695	Putative uncharacterized protein		MSTRG.14815	solute carrier family 2, facilitated glucose transporter member 1-like [Nilaparvata lugens]
Sfur004871	Trypsin 3A1		MSTRG.14976	-
Sfur004877	Putative uncharacterized protein		MSTRG.14981	-
Sfur005164	Putative uncharacterized protein		MSTRG.14985	-
Sfur005168	Putative uncharacterized protein		MSTRG.1499	BRCA1-associated RING domain protein 1-like [Nilaparvata lugens]
Sfur005266	Ejaculatory bulb-specific protein 3		MSTRG.15047	dorsal-ventral patterning protein Sog [Nilaparvata lugens]
Sfur005310	Mitochondrial uncoupling protein 2		MSTRG.15048	hypothetical protein LSTR_LSTR007131 [Laodelphax striatellus]
Sfur005629	Phosphatidylinositol glycan anchor biosynthesis class U protein		MSTRG.15050	dorsal-ventral patterning protein Sog [Nilaparvata lugens]
Sfur005767	3-ketoacyl-CoA thiolase, mitochondrial		MSTRG.15131	BMP and activin membrane-bound inhibitor homolog [Cimex lectularius]
Sfur005841	RB1-inducible coiled-coil protein 1		MSTRG.15349	-
Sfur005902	Putative uncharacterized protein		MSTRG.1537	symplekin [Nilaparvata lugens]
Sfur005980	Putative uncharacterized protein		MSTRG.15402	mucin-7-like [Nilaparvata lugens]
Sfur006024	Bromo adjacent homology domain-containing 1 protein		MSTRG.15448	neuropeptide GPCR B1 [Nilaparvata lugens]
Sfur006059	Vesicular glutamate transporter 1		MSTRG.15458	calmodulin-binding transcription activator 2 isoform X8 [Cryptotermes secundus]
Sfur006153	Putative uncharacterized protein		MSTRG.15630	uncharacterized protein LOC111056397 [Nilaparvata lugens]
Sfur006327	Putative uncharacterized protein		MSTRG.15727	3-ketoacyl-CoA thiolase, mitochondrial [Nilaparvata lugens]
Sfur006396	Putative uncharacterized protein		MSTRG.15823	AGAP002975-PA-like protein [Anopheles sinensis]
Sfur006752	Putative uncharacterized protein		MSTRG.1598	fatty acid elongase [Nilaparvata lugens]
Sfur006764	Putative uncharacterized protein		MSTRG.16039	leucine-rich repeat-containing protein 34-like [Nilaparvata lugens]
Sfur006776	Histone-lysine N-methyltransferase ASH1L		MSTRG.16091	protein virilizer homolog [Nilaparvata lugens]
Sfur006937	Ribokinase		MSTRG.16092	protein virilizer homolog [Nilaparvata lugens]
Sfur006939	LIM and SH3 domain protein F42H10.3		MSTRG.16101	PREDICTED: muscle M-line assembly protein unc-89 isoform X1 [Bemisia tabaci]
Sfur006946	Putative uncharacterized protein		MSTRG.16106	snRNA-activating protein complex subunit 4 [Zootermopsis nevadensis]
Sfur007299	Protein takeout		MSTRG.16162	latent-transforming growth factor beta-binding protein 2-like isoform X2 [Nilaparvata lugens]
Sfur007675	Alpha-1A adrenergic receptor		MSTRG.16436	tctex1 domain-containing protein 1-A isoform X2 [Nilaparvata lugens]
Sfur007838	Putative uncharacterized protein		MSTRG.16579	uncharacterized protein LOC111054331 [Nilaparvata lugens]
Sfur008091	RB1-inducible coiled-coil protein 1		MSTRG.16989	zinc finger SWIM domain-containing protein 1-like [Nilaparvata lugens]
Sfur008477	Alpha-tocopherol transfer protein-like		MSTRG.17552	CD109 antigen [Nilaparvata lugens]
Sfur008488	BPTI/Kunitz domain-containing protein (Fragment)		MSTRG.17562	hypothetical protein LSTR_LSTR000052 [Laodelphax striatellus]
Sfur008503	Putative uncharacterized protein		MSTRG.17614	putative tick transposon [Operophtera brumata]
Sfur008722	Inactive tyrosine-protein kinase 7		MSTRG.17621	probable salivary secreted peptide [Nilaparvata lugens]
Sfur008868	Copper transport protein ATOX1		MSTRG.17894	hypothetical protein LSTR_LSTR013002 [Laodelphax striatellus]
Sfur009226	Putative uncharacterized protein		MSTRG.17895	G patch domain and ankyrin repeat-containing protein 1 homolog [Nilaparvata lugens]
Sfur009382	Putative uncharacterized protein		MSTRG.1836	-
Sfur009447	Uricase		MSTRG.18564	organic cation transporter protein [Nilaparvata lugens]
Sfur009541	Vacuolar ATPase assembly integral membrane protein VMA21 homolog		MSTRG.18565	organic cation transporter protein [Nilaparvata lugens]
Sfur009576	Protein SSXT		MSTRG.18567	organic cation transporter protein [Nilaparvata lugens]
Sfur009957	Uridine phosphorylase 1		MSTRG.18568	organic cation transporter protein [Nilaparvata lugens]
Sfur010010	Putative uncharacterized protein		MSTRG.18723	hypothetical protein B7P43_G11194 [Cryptotermes secundus]
Sfur010067	Probable 3',5'-cyclic phosphodiesterase pde-5		MSTRG.18791	hypothetical protein LSTR_LSTR000785 [Laodelphax striatellus]
Sfur010100	Bestrophin-3		MSTRG.18937	collagen alpha-1(III) chain-like [Nilaparvata lugens]
Sfur010345	ABC transporter G family member 20		MSTRG.18965	reverse transcriptase, partial [Aedes aegypti]
Sfur010546	Pickpocket protein 28		MSTRG.19046	luciferin 4-monooxygenase [Nilaparvata lugens]
Sfur010797	Aryl hydrocarbon receptor nuclear translocator-like protein 1		MSTRG.19083	bromodomain-containing protein 4-like [Ctenocephalides felis]
Sfur011043	Putative uncharacterized protein		MSTRG.19085	dentin sialophosphoprotein-like isoform X1 [Nilaparvata lugens]
Sfur011205	Venom serine protease Bi-VSP		MSTRG.19090	-
Sfur011348	Putative uncharacterized protein		MSTRG.19105	Sorbin and SH3 domain-containing protein 1 [Trachymyrmex septentrionalis]
Sfur011355	Acidic amino acid decarboxylase GADL1 (Fragment)		MSTRG.19129	glucose dehydrogenase [FAD, quinone]-like [Nilaparvata lugens]
Sfur011490	Nucleosomal histone kinase 1		MSTRG.19193	C-Maf-inducing protein-like [Nilaparvata lugens]
Sfur011639	Venom serine protease Bi-VSP		MSTRG.19299	protein disabled [Nilaparvata lugens]
Sfur011940	Dipeptidyl peptidase 3		MSTRG.19361	-
Sfur012445	Putative uncharacterized protein		MSTRG.19696	cilia- and flagella-associated protein 47-like [Nilaparvata lugens]
Sfur012506	Apolipoprotein D		MSTRG.19881	hypothetical protein LSTR_LSTR012046 [Laodelphax striatellus]
Sfur012589	Putative uncharacterized protein		MSTRG.19931	AAEL000683-PA [Aedes aegypti]
Sfur012615	Kielin/chordin-like protein		MSTRG.2001	phosphoesterase 41, partial [Laodelphax striatellus]
Sfur012962	Facilitated trehalose transporter Tret1		MSTRG.2003	seminal fluid protein [Nilaparvata lugens]
Sfur012973	Mitochondrial intermediate peptidase		MSTRG.2005	UDP-glucose:glycoprotein glucosyltransferase-like, partial [Nilaparvata lugens]
Sfur013239	Fatty-acid amide hydrolase 2		MSTRG.20053	cell wall protein IFF6 isoform X3 [Nilaparvata lugens]
Sfur013517	Autophagy-related protein 16-1		MSTRG.20057	keratin, type I cytoskeletal 9-like [Nilaparvata lugens]
Sfur013811	Putative uncharacterized protein		MSTRG.2021	armadillo repeat-containing protein 3-like [Nilaparvata lugens]
Sfur013880	Transcription factor Ken 1		MSTRG.2032	PREDICTED: kinesin-related protein 4 isoform X2 [Crassostrea gigas]
Sfur014383	Putative uncharacterized protein		MSTRG.20384	hypothetical protein LSTR_LSTR007728 [Laodelphax striatellus]
Sfur014600	Cytochrome P450 4C1		MSTRG.20639	myosin heavy chain-like isoform X1 [Nilaparvata lugens]
Sfur014800	Cuticle protein 8		MSTRG.20750	EF-hand calcium-binding domain-containing protein 2-like [Nilaparvata lugens]
Sfur014875	Putative uncharacterized protein		MSTRG.21035	hypothetical protein B7P43_G14705 [Cryptotermes secundus]
Sfur014923	Rab GTPase-activating protein 1		MSTRG.21282	-
Sfur015178	Putative uncharacterized protein		MSTRG.2136	hypothetical protein LSTR_LSTR012045 [Laodelphax striatellus]
Sfur015309	Cuticle protein 19.8		MSTRG.21520	cuticular protein [Nilaparvata lugens]
			MSTRG.21722	myosin-VIIa isoform X1 [Nilaparvata lugens]
			MSTRG.2174	tetraspanin-18-like [Nilaparvata lugens]
			MSTRG.21946	NAD-dependent protein deacetylase Sir2B-like [Myzus persicae]
			MSTRG.22152	GTP cyclohydrolase 1 feedback regulatory protein-like [Actinia tenebrosa]
			MSTRG.22416	m7GpppX diphosphatase-like isoform X1 [Nilaparvata lugens]
			MSTRG.22592	amyloid beta A4 precursor protein-binding family B member 1-interacting protein-like, partial [Nilaparvata lugens]
			MSTRG.22658	-
			MSTRG.2266	pregnancy zone protein-like [Nilaparvata lugens]
			MSTRG.2267	hypothetical protein LSTR_LSTR000051 [Laodelphax striatellus]
			MSTRG.22713	farnesol dehydrogenase-like [Nilaparvata lugens]
			MSTRG.22817	probable serine/threonine-protein kinase clkA, partial [Nilaparvata lugens]
			MSTRG.22970	proton-coupled amino acid transporter-like protein pathetic [Nilaparvata lugens]
			MSTRG.23148	Palmitoyltransferase ZDHHC17 [Dufourea novaeangliae]
			MSTRG.23174	AAEL014873-PA [Aedes aegypti]
			MSTRG.23182	hypothetical protein LSTR_LSTR011681 [Laodelphax striatellus]
			MSTRG.23211	glycine-rich cell wall structural protein 1.8-like [Nilaparvata lugens]
			MSTRG.23311	hypothetical protein LSTR_LSTR011799 [Laodelphax striatellus]
			MSTRG.23312	hypothetical protein LSTR_LSTR011800 [Laodelphax striatellus]
			MSTRG.23716	UNC93-like protein MFSD11 [Nilaparvata lugens]
			MSTRG.23721	LOW QUALITY PROTEIN: adenylate cyclase type 9-like [Nilaparvata lugens]
			MSTRG.23723	golgin subfamily B member 1-like [Nilaparvata lugens]
			MSTRG.23771	AGAP004888-PA-like protein [Anopheles sinensis]
			MSTRG.23828	transmembrane protein 69-like [Nilaparvata lugens]
			MSTRG.23832	LOW QUALITY PROTEIN: adenylate cyclase type 9-like [Nilaparvata lugens]
			MSTRG.23834	golgin subfamily B member 1-like [Nilaparvata lugens]
			MSTRG.23839	LOW QUALITY PROTEIN: adenylate cyclase type 9-like [Nilaparvata lugens]
			MSTRG.23892	kazal-type proteinase inhibitor [Lasius niger]
			MSTRG.23935	hypothetical protein LSTR_LSTR003929 [Laodelphax striatellus]
			MSTRG.23985	uncharacterized protein LOC111044381 isoform X1 [Nilaparvata lugens]
			MSTRG.24009	sodium/calcium exchanger 1 [Nilaparvata lugens]
			MSTRG.24079	proteasome subunit alpha type-2 [Nilaparvata lugens]
			MSTRG.24153	pantothenate kinase 3-like isoform X2 [Nilaparvata lugens]
			MSTRG.24161	suppressor protein SRP40-like [Nilaparvata lugens]
			MSTRG.24193	uncharacterized protein LOC111050391 [Nilaparvata lugens]
			MSTRG.24394	protein SERAC1 isoform X2 [Cimex lectularius]
			MSTRG.2443	LOW QUALITY PROTEIN: H(+)/Cl(-) exchange transporter 7-like [Nilaparvata lugens]
			MSTRG.24440	polyprotein [Mizuhopecten yessoensis]
			MSTRG.2449	LOW QUALITY PROTEIN: decaprenyl-diphosphate synthase subunit 2 [Nilaparvata lugens]
			MSTRG.24665	protein D2-like isoform X2 [Nilaparvata lugens]
			MSTRG.24796	-
			MSTRG.24865	glucose dehydrogenase [FAD, quinone]-like [Nilaparvata lugens]
			MSTRG.25015	glucose dehydrogenase [FAD, quinone]-like [Nilaparvata lugens]
			MSTRG.25232	hypothetical protein LSTR_LSTR003003 [Laodelphax striatellus]
			MSTRG.25238	PREDICTED: RNA-directed DNA polymerase from mobile element jockey-like isoform X1 [Amyelois transitella]
			MSTRG.2534	-
			MSTRG.25384	uncharacterized protein LOC111053345 [Nilaparvata lugens]
			MSTRG.25433	-
			MSTRG.25527	-
			MSTRG.25617	hexokinase type 2 isoform X2 [Nilaparvata lugens]
			MSTRG.25708	hypothetical protein LSTR_LSTR007419 [Laodelphax striatellus]
			MSTRG.26008	uncharacterized protein LOC111052038 [Nilaparvata lugens]
			MSTRG.26158	protein DPCD [Nilaparvata lugens]
			MSTRG.26165	fibroblast growth factor 18 isoform X2 [Nilaparvata lugens]
			MSTRG.26166	fibroblast growth factor 18 isoform X1 [Nilaparvata lugens]
			MSTRG.2618	valine--tRNA ligase isoform X2 [Nilaparvata lugens]
			MSTRG.26349	nucleoporin Nup43-like [Nilaparvata lugens]
			MSTRG.26472	serine protease 29-like [Nilaparvata lugens]
			MSTRG.26473	serine protease 29-like [Nilaparvata lugens]
			MSTRG.26543	hypothetical protein LSTR_LSTR001290 [Laodelphax striatellus]
			MSTRG.26620	Krueppel-like factor 14 [Aphis craccivora]
			MSTRG.26655	hypothetical protein LSTR_LSTR008988 [Laodelphax striatellus]
			MSTRG.26780	venom protease-like [Nilaparvata lugens]
			MSTRG.26786	venom protease-like [Nilaparvata lugens]
			MSTRG.27031	dimethyladenosine transferase 2, mitochondrial isoform X2 [Zootermopsis nevadensis]
			MSTRG.27062	hypothetical protein LSTR_LSTR003651 [Laodelphax striatellus]
			MSTRG.27167	synaptotagmin 1 isoform X7 [Nilaparvata lugens]
			MSTRG.27175	ATP-dependent RNA helicase dbp2-like [Nilaparvata lugens]
			MSTRG.27232	protein giant-lens-like [Myzus persicae]
			MSTRG.2726	Superoxide dismutase [Cu-Zn] B [Melipona quadrifasciata]
			MSTRG.27383	glutathione s-transferase O1 [Sogatella furcifera]
			MSTRG.27460	methyltransferase-like protein 9 isoform X1 [Nilaparvata lugens]
			MSTRG.27586	dipeptidase 1-like isoform X1 [Nilaparvata lugens]
			MSTRG.27637	kelch-like protein 10 [Nilaparvata lugens]
			MSTRG.27638	kelch-like protein 10 [Anoplophora glabripennis]
			MSTRG.27684	nucleolar protein 58, partial [Nilaparvata lugens]
			MSTRG.27685	nucleolar protein 58, partial [Nilaparvata lugens]
			MSTRG.27838	cell adhesion molecule 2-like [Halyomorpha halys]
			MSTRG.28011	ATP-dependent RNA helicase A [Nilaparvata lugens]
			MSTRG.28590	acidic leucine-rich nuclear phosphoprotein 32 family member B-like [Nilaparvata lugens]
			MSTRG.28763	phospholipase A1 1-like [Nilaparvata lugens]
			MSTRG.28765	phospholipase A1 1-like [Nilaparvata lugens]
			MSTRG.28782	pao retrotransposon peptidase [Lasius niger]
			MSTRG.28911	Myb DNA-bind 5 domain-containing protein, partial [Aphis craccivora]
			MSTRG.29212	lysosomal-trafficking regulator-like [Nilaparvata lugens]
			MSTRG.29215	lysosomal-trafficking regulator-like [Nilaparvata lugens]
			MSTRG.29317	-
			MSTRG.29417	calponin homology domain-containing protein DDB_G0272472 isoform X1 [Nilaparvata lugens]
			MSTRG.29514	protein IFH1-like [Nilaparvata lugens]
			MSTRG.2971	alpha-tocopherol transfer protein-like [Cimex lectularius]
			MSTRG.3014	hexokinase [Sogatella furcifera]
			MSTRG.30140	hypothetical protein LSTR_LSTR011822 [Laodelphax striatellus]
			MSTRG.30142	cuticle protein [Nilaparvata lugens]
			MSTRG.30143	cuticle protein [Nilaparvata lugens]
			MSTRG.30145	cuticle protein 16.5-like [Frankliniella occidentalis]
			MSTRG.30150	prisilkin-39-like [Nilaparvata lugens]
			MSTRG.30154	-
			MSTRG.30161	hypothetical protein LSTR_LSTR007444 [Laodelphax striatellus]
			MSTRG.30273	sulfotransferase 1C4-like [Nilaparvata lugens]
			MSTRG.30284	lysosomal alpha-glucosidase [Sogatella furcifera]
			MSTRG.30416	cytochrome P450 CYP6AX3 [Sogatella furcifera]
			MSTRG.30429	hypothetical protein LSTR_LSTR007918 [Laodelphax striatellus]
			MSTRG.30458	A disintegrin and metalloproteinase with thrombospondin motifs 20-like isoform X3 [Zootermopsis nevadensis]
			MSTRG.30462	A disintegrin and metalloproteinase with thrombospondin motifs 9-like [Nilaparvata lugens]
			MSTRG.30463	A disintegrin and metalloproteinase with thrombospondin motifs 9-like [Nilaparvata lugens]
			MSTRG.30612	potassium channel subfamily T member 1-like isoform X3 [Pogonomyrmex barbatus]
			MSTRG.30679	-
			MSTRG.31105	GILT-like protein 1 isoform X1 [Nilaparvata lugens]
			MSTRG.31246	homeobox protein caupolican-like [Photinus pyralis]
			MSTRG.31317	U6 snRNA-associated Sm-like protein LSm2 [Nilaparvata lugens]
			MSTRG.31343	uncharacterized protein LOC111046488 [Nilaparvata lugens]
			MSTRG.314	SOSS complex subunit C homolog B [Nilaparvata lugens]
			MSTRG.31591	calcium-binding mitochondrial carrier protein SCaMC-2-A isoform X3 [Nilaparvata lugens]
			MSTRG.31774	zinc finger protein 337-like isoform X2 [Nilaparvata lugens]
			MSTRG.31911	-
			MSTRG.31912	seminal fluid protein, partial [Nilaparvata lugens]
			MSTRG.31937	flap endonuclease GEN homolog 1-like [Nilaparvata lugens]
			MSTRG.32051	histidine-rich glycoprotein-like [Nilaparvata lugens]
			MSTRG.32055	hypothetical protein LSTR_LSTR001863 [Laodelphax striatellus]
			MSTRG.32159	titin-like [Nilaparvata lugens]
			MSTRG.32162	titin-like [Nilaparvata lugens]
			MSTRG.32164	titin-like [Nilaparvata lugens]
			MSTRG.32167	LOW QUALITY PROTEIN: SEC14 domain and spectrin repeat-containing protein 1 [Nilaparvata lugens]
			MSTRG.32258	ninjurin-2-like [Nilaparvata lugens]
			MSTRG.32264	proton-coupled amino acid transporter-like protein CG1139 [Nilaparvata lugens]
			MSTRG.32291	negative elongation factor E, partial [Asbolus verrucosus]
			MSTRG.3233	lysosomal alpha-glucosidase [Sogatella furcifera]
			MSTRG.32397	heat shock 70 kDa protein II-like [Nilaparvata lugens]
			MSTRG.32447	ninjurin-2-like [Nilaparvata lugens]
			MSTRG.32477	rhythmically expressed gene 5 protein [Nilaparvata lugens]
			MSTRG.32515	F-actin-methionine sulfoxide oxidase Mical [Nilaparvata lugens]
			MSTRG.32775	cuticular protein [Nilaparvata lugens]
			MSTRG.32777	cuticular protein [Nilaparvata lugens]
			MSTRG.32790	cuticular protein [Nilaparvata lugens]
			MSTRG.32805	cuticle protein 7-like [Nilaparvata lugens]
			MSTRG.32806	cuticle protein 7-like [Nilaparvata lugens]
			MSTRG.32888	uncharacterized protein LOC111052800 [Nilaparvata lugens]
			MSTRG.32937	trithorax group protein osa-like [Nilaparvata lugens]
			MSTRG.33073	Polycystic kidney disease protein 1-like 2 [Exaiptasia pallida]
			MSTRG.33448	Integrase catalytic domain-containing protein [Aphis craccivora]
			MSTRG.33487	aquaporin AQPcic, partial [Nilaparvata lugens]
			MSTRG.33501	leucine-rich repeat transmembrane neuronal protein 2-like [Nilaparvata lugens]
			MSTRG.33757	dystrophin, isoforms A/C/F/G/H-like, partial [Nilaparvata lugens]
			MSTRG.33833	odorant-binding protein 7 [Sogatella furcifera]
			MSTRG.3384	claspin-like isoform X1 [Nilaparvata lugens]
			MSTRG.33844	hypothetical protein LSTR_LSTR002376 [Laodelphax striatellus]
			MSTRG.34003	heat shock cognate protein 70 [Laodelphax striatellus]
			MSTRG.34004	heat shock cognate protein 70 [Laodelphax striatellus]
			MSTRG.34041	hypothetical protein LSTR_LSTR012489 [Laodelphax striatellus]
			MSTRG.34045	nose resistant to fluoxetine protein 6-like [Nilaparvata lugens]
			MSTRG.34247	hypothetical protein LSTR_LSTR013687 [Laodelphax striatellus]
			MSTRG.344	uncharacterized protein LOC111052997 [Nilaparvata lugens]
			MSTRG.34473	hypothetical protein LSTR_LSTR008167 [Laodelphax striatellus]
			MSTRG.34474	hypothetical protein LSTR_LSTR008167 [Laodelphax striatellus]
			MSTRG.34530	glycine-rich cuticular protein [Nilaparvata lugens]
			MSTRG.34531	glycine-rich cuticular protein [Nilaparvata lugens]
			MSTRG.34656	hypothetical protein LSTR_LSTR012904 [Laodelphax striatellus]
			MSTRG.34798	hypothetical protein LSTR_LSTR012521 [Laodelphax striatellus]
			MSTRG.34922	dual specificity protein phosphatase 22-B [Nilaparvata lugens]
			MSTRG.34961	nose resistant to fluoxetine protein 6-like [Nilaparvata lugens]
			MSTRG.34962	nose resistant to fluoxetine protein 6-like [Nilaparvata lugens]
			MSTRG.34969	nose resistant to fluoxetine protein 6-like [Cimex lectularius]
			MSTRG.3501	DEAD-box ATP-dependent RNA helicase 20-like isoform X2 [Nilaparvata lugens]
			MSTRG.35037	clavesin-1-like [Nilaparvata lugens]
			MSTRG.35042	hypothetical protein LSTR_LSTR013305 [Laodelphax striatellus]
			MSTRG.35187	hypothetical protein LSTR_LSTR013175 [Laodelphax striatellus]
			MSTRG.35194	pro-resilin-like [Nilaparvata lugens]
			MSTRG.35254	hypothetical protein LSTR_LSTR013318 [Laodelphax striatellus]
			MSTRG.35286	alpha-tocopherol transfer protein-like [Nilaparvata lugens]
			MSTRG.35327	hypothetical protein LSTR_LSTR009980 [Laodelphax striatellus]
			MSTRG.35331	transcription factor MafK [Nilaparvata lugens]
			MSTRG.35338	synaptic vesicle glycoprotein 2A-like [Nilaparvata lugens]
			MSTRG.35474	seminal fluid protein [Nilaparvata lugens]
			MSTRG.3557	DUF4817 domain-containing protein [Aphis craccivora]
			MSTRG.35605	aminopeptidase N isoform X1 [Nilaparvata lugens]
			MSTRG.3583	-
			MSTRG.35888	zinc finger BED domain-containing protein 5-like [Onthophagus taurus]
			MSTRG.35909	hypothetical protein LSTR_LSTR009318 [Laodelphax striatellus]
			MSTRG.35925	PREDICTED: loricrin-like [Bemisia tabaci]
			MSTRG.35966	lipase 1-like [Nilaparvata lugens]
			MSTRG.35989	C3 and PZP-like alpha-2-macroglobulin domain-containing protein 8 [Nilaparvata lugens]
			MSTRG.36146	AN1-type zinc finger protein 6 [Nilaparvata lugens]
			MSTRG.36166	alpha-tocopherol transfer protein-like isoform X2 [Nilaparvata lugens]
			MSTRG.36203	uncharacterized protein LOC111045609 [Nilaparvata lugens]
			MSTRG.36373	hypothetical protein LSTR_LSTR008666 [Laodelphax striatellus]
			MSTRG.36382	mitochondrial uncoupling protein 4 [Nilaparvata lugens]
			MSTRG.3646	protein NYNRIN-like [Aphis craccivora]
			MSTRG.3655	condensin complex subunit 3-like [Nilaparvata lugens]
			MSTRG.36562	vacuolar protein sorting-associated protein 13 [Nilaparvata lugens]
			MSTRG.36572	structural maintenance of chromosomes protein 1A [Nilaparvata lugens]
			MSTRG.36634	indian hedgehog protein [Nilaparvata lugens]
			MSTRG.36688	uridine phosphorylase 1 isoform X2 [Sogatella furcifera]
			MSTRG.36719	-
			MSTRG.36803	transcription activator MSS11-like [Cimex lectularius]
			MSTRG.36866	easter-7 [Nilaparvata lugens]
			MSTRG.36868	easter-7 [Nilaparvata lugens]
			MSTRG.36919	hypothetical protein LSTR_LSTR013068 [Laodelphax striatellus]
			MSTRG.37153	hypothetical protein LSTR_LSTR007883 [Laodelphax striatellus]
			MSTRG.37186	myogenesis-regulating glycosidase isoform X3 [Halyomorpha halys]
			MSTRG.37195	cilia- and flagella-associated protein 58-like [Nilaparvata lugens]
			MSTRG.37219	cyclic AMP response element-binding protein A-like [Nilaparvata lugens]
			MSTRG.37220	cyclic AMP response element-binding protein A-like [Nilaparvata lugens]
			MSTRG.37221	heterogeneous nuclear ribonucleoprotein 27C [Nilaparvata lugens]
			MSTRG.37368	protein fem-1 homolog CG6966 [Nilaparvata lugens]
			MSTRG.37369	protein fem-1 homolog CG6966 [Nilaparvata lugens]
			MSTRG.37439	-
			MSTRG.37572	mucin-5AC [Camponotus floridanus]
			MSTRG.37595	ras-specific guanine nucleotide-releasing factor 2-like, partial [Nilaparvata lugens]
			MSTRG.37848	optomotor-blind protein-like isoform X4 [Nilaparvata lugens]
			MSTRG.38209	Zinc finger protein 507 [Acromyrmex echinatior]
			MSTRG.3838	adhesive plaque matrix protein-like [Nilaparvata lugens]
			MSTRG.38392	glucose dehydrogenase [FAD, quinone]-like [Nilaparvata lugens]
			MSTRG.38393	glucose dehydrogenase [FAD, quinone]-like [Nilaparvata lugens]
			MSTRG.38468	glucose dehydrogenase [FAD, quinone]-like [Nilaparvata lugens]
			MSTRG.38503	glucose dehydrogenase [FAD, quinone]-like [Nilaparvata lugens]
			MSTRG.38666	transmembrane protein 134 [Nilaparvata lugens]
			MSTRG.3881	AGAP004125-PA [Anopheles gambiae str. PEST] [Anopheles gambiae]
			MSTRG.38817	Inositol 1,4,5-trisphosphate receptor [Cryptotermes secundus]
			MSTRG.3884	glutaminyl-peptide cyclotransferase-like isoform X2 [Nilaparvata lugens]
			MSTRG.39048	-
			MSTRG.3907	probable RNA polymerase II nuclear localization protein SLC7A6OS [Nilaparvata lugens]
			MSTRG.39639	Chitin binding domain [Trinorchestia longiramus]
			MSTRG.39677	hypothetical protein LSTR_LSTR005631 [Laodelphax striatellus]
			MSTRG.39804	neuroblastoma-amplified sequence-like [Nilaparvata lugens]
			MSTRG.39806	paired amphipathic helix protein Sin3a-like isoform X2 [Actinia tenebrosa]
			MSTRG.39828	hypothetical protein LSTR_LSTR011578 [Laodelphax striatellus]
			MSTRG.39957	protein DEK-like [Nilaparvata lugens]
			MSTRG.39994	protein takeout-like [Nilaparvata lugens]
			MSTRG.4013	protein ecdysoneless [Nilaparvata lugens]
			MSTRG.4151	DNA repair protein RAD50 [Nilaparvata lugens]
			MSTRG.4228	ribonuclease P protein subunit p29 [Nilaparvata lugens]
			MSTRG.4286	protein msta-like [Nilaparvata lugens]
			MSTRG.4322	upstream activation factor subunit spp27-like [Nilaparvata lugens]
			MSTRG.4405	hypothetical protein LSTR_LSTR014163 [Laodelphax striatellus]
			MSTRG.4449	osiris 24-like protein [Lasius niger]
			MSTRG.4572	hypothetical protein LSTR_LSTR008314 [Laodelphax striatellus]
			MSTRG.4676	ATP-citrate synthase-like isoform X2 [Nilaparvata lugens]
			MSTRG.4684	ATP-citrate synthase-like isoform X2 [Nilaparvata lugens]
			MSTRG.4869	hypothetical protein LSTR_LSTR005539 [Laodelphax striatellus]
			MSTRG.4917	-
			MSTRG.4940	proclotting enzyme-3 [Nilaparvata lugens]
			MSTRG.4941	proclotting enzyme-3 [Nilaparvata lugens]
			MSTRG.4994	androgen-dependent TFPI-regulating protein-like [Nilaparvata lugens]
			MSTRG.5237	Transcription factor homeodomain, male germ-cell [Cinara cedri]
			MSTRG.5282	high mobility group protein I [Sipha flava]
			MSTRG.5392	microtubule-associated protein futsch-like isoform X1 [Nilaparvata lugens]
			MSTRG.5444	F-box only protein 7-like [Pieris rapae]
			MSTRG.5486	serine protease 7-like [Nilaparvata lugens]
			MSTRG.5508	-
			MSTRG.5525	PREDICTED: zinc finger protein 197-like isoform X2 [Bemisia tabaci]
			MSTRG.553	cilia- and flagella-associated protein 61-like, partial [Nilaparvata lugens]
			MSTRG.554	radial spoke head protein 3 homolog B-like [Nilaparvata lugens]
			MSTRG.5712	Aldehyde dehydrogenase family 16 member A1-like Protein [Tribolium castaneum]
			MSTRG.5742	uncharacterized protein LOC114347285 isoform X3 [Diabrotica virgifera virgifera]
			MSTRG.6030	apolipoprotein D-like [Frankliniella occidentalis]
			MSTRG.613	GDP-L-fucose synthase [Nilaparvata lugens]
			MSTRG.6164	hypothetical protein LSTR_LSTR006956 [Laodelphax striatellus]
			MSTRG.631	C-type lectin domain family 12 member B-like [Nilaparvata lugens]
			MSTRG.6360	protein drumstick isoform X1 [Nilaparvata lugens]
			MSTRG.686	PREDICTED: lysosomal-trafficking regulator [Bemisia tabaci]
			MSTRG.7169	hypothetical protein LSTR_LSTR005268 [Laodelphax striatellus]
			MSTRG.7293	titin-like [Nilaparvata lugens]
			MSTRG.7334	protein msta-like [Nilaparvata lugens]
			MSTRG.7349	GTP-binding protein Rheb-like [Nilaparvata lugens]
			MSTRG.7428	nuclear pore complex protein DDB_G0274915-like [Nilaparvata lugens]
			MSTRG.7566	armadillo repeat-containing protein 3-like [Nilaparvata lugens]
			MSTRG.7636	F-box only protein 39-like [Nilaparvata lugens]
			MSTRG.7758	Orange domain [Cinara cedri]
			MSTRG.7798	GH18386 [Drosophila grimshawi]
			MSTRG.7920	UDP-glucuronosyltransferase 2B18-like [Nilaparvata lugens]
			MSTRG.803	PREDICTED: kinesin-related protein 4 isoform X1 [Crassostrea gigas]
			MSTRG.8225	hypothetical protein LSTR_LSTR008437 [Laodelphax striatellus]
			MSTRG.8273	glycosylphosphatidylinositol anchor attachment 1 protein-like [Nilaparvata lugens]
			MSTRG.833	fasciclin-3 isoform X1 [Cimex lectularius]
			MSTRG.8436	-
			MSTRG.8494	uncharacterized protein LOC111061860 [Nilaparvata lugens]
			MSTRG.8496	uncharacterized protein LOC111061860 [Nilaparvata lugens]
			MSTRG.8498	uncharacterized protein LOC111061861 isoform X2 [Nilaparvata lugens]
			MSTRG.850	alpha-tocopherol transfer protein-like [Nilaparvata lugens]
			MSTRG.8532	nucleoporin NDC1 [Nilaparvata lugens]
			MSTRG.8540	hypothetical protein Avbf_13001 [Armadillidium vulgare]
			MSTRG.8620	-
			MSTRG.8630	CLUMA_CG002505, isoform A [Clunio marinus]
			MSTRG.8631	CLUMA_CG002505, isoform A [Clunio marinus]
			MSTRG.8635	cuticle protein 19.8-like [Nilaparvata lugens]
			MSTRG.8636	cuticle protein 19.8-like [Nilaparvata lugens]
			MSTRG.8666	PREDICTED: polyamine-modulated factor 1-like [Neodiprion lecontei]
			MSTRG.8679	keratin, type I cytoskeletal 9-like [Nilaparvata lugens]
			MSTRG.88	mucin-5AC-like [Ctenocephalides felis]
			MSTRG.8996	scavenger receptor class B member 1-like [Nilaparvata lugens]
			MSTRG.9006	-
			MSTRG.9007	-
			MSTRG.9032	LOW QUALITY PROTEIN: DNA replication licensing factor Mcm6-like [Nilaparvata lugens]
			MSTRG.9036	LOW QUALITY PROTEIN: DNA replication licensing factor Mcm6-like [Nilaparvata lugens]
			MSTRG.9056	BRCA1-associated protein [Nilaparvata lugens]
			MSTRG.9097	prostate stem cell antigen [Zootermopsis nevadensis]
			MSTRG.9131	PREDICTED: troponin C-like [Nicrophorus vespilloides]
			MSTRG.9150	probable ATP-dependent RNA helicase DDX52 [Nilaparvata lugens]
			MSTRG.9162	unkown protein [Riptortus pedestris]
			MSTRG.9294	-
			MSTRG.935	Transposon Tf2-6 polyprotein [Araneus ventricosus]
			MSTRG.9553	hypothetical protein LSTR_LSTR008923 [Laodelphax striatellus]
			MSTRG.9601	pollen-specific leucine-rich repeat extensin-like protein 1 [Nilaparvata lugens]
			MSTRG.976	TBC1 domain family member 4 isoform X2 [Cryptotermes secundus]
			MSTRG.9846	guanylate cyclase 32E-like isoform X1 [Melanaphis sacchari]
			Sfur000025	Putative uncharacterized protein
			Sfur000035	Solute carrier family 2, facilitated glucose transporter member 8
			Sfur000038	Mitotic checkpoint serine/threonine-protein kinase BUB1
			Sfur000047	Elongation of very long chain fatty acids protein AAEL008004
			Sfur000053	Protein takeout
			Sfur000059	Putative uncharacterized protein
			Sfur000068	Putative uncharacterized protein
			Sfur000070	DNA polymerase alpha catalytic subunit
			Sfur000071	DNA replication licensing factor Mcm7
			Sfur000079	Ras-related GTP-binding protein A
			Sfur000082	Protocadherin-like wing polarity protein stan
			Sfur000095	Serine/threonine-protein kinase polo
			Sfur000100	Cytochrome P450 4C1
			Sfur000109	ATP-dependent DNA helicase DDX11
			Sfur000110	Lysosomal thioesterase PPT2 homolog
			Sfur000111	Arylsulfatase B
			Sfur000112	Protein kinase C-binding protein 1
			Sfur000117	Probable multidrug resistance-associated protein lethal(2)03659
			Sfur000122	Intracellular coagulation inhibitor 1
			Sfur000141	Protein takeout
			Sfur000145	DNA replication licensing factor Mcm7
			Sfur000151	Protein takeout
			Sfur000157	Hydroxyacid oxidase 1
			Sfur000166	Protein takeout
			Sfur000167	SH3 and cysteine-rich domain-containing protein 2
			Sfur000171	Protein MMS22-like
			Sfur000184	Putative uncharacterized protein
			Sfur000186	Protein takeout
			Sfur000193	Pancreatic lipase-related protein 2
			Sfur000207	Hydroxymethylglutaryl-CoA synthase, cytoplasmic
			Sfur000209	UDP-glucose:glycoprotein glucosyltransferase
			Sfur000219	Filamin-C
			Sfur000224	Neuroligin-4, Y-linked
			Sfur000236	Putative uncharacterized protein
			Sfur000238	Calcium homeostasis endoplasmic reticulum protein
			Sfur000240	Trifunctional enzyme subunit beta, mitochondrial
			Sfur000243	F-box-like/WD repeat-containing protein TBL1XR1
			Sfur000246	Protein takeout
			Sfur000252	Maltase 2
			Sfur000262	NAD(P) transhydrogenase, mitochondrial
			Sfur000268	Elongation of very long chain fatty acids protein AAEL008004
			Sfur000269	Tubulin alpha-1 chain
			Sfur000273	Elongation of very long chain fatty acids protein AAEL008004
			Sfur000280	Transcription factor cwo
			Sfur000284	Putative uncharacterized protein
			Sfur000286	Cytochrome P450 4c3
			Sfur000294	EF-hand domain-containing family member C2
			Sfur000297	Choline transporter-like 1
			Sfur000300	Probable GDP-L-fucose synthase
			Sfur000301	Elongation of very long chain fatty acids protein AAEL008004
			Sfur000302	Endoplasmin
			Sfur000311	Protein takeout
			Sfur000315	Aminoacylase-1
			Sfur000318	Protein takeout
			Sfur000321	General transcription factor 3C polypeptide 1
			Sfur000322	Solute carrier family 2, facilitated glucose transporter member 8
			Sfur000323	Cytochrome P450 4C1
			Sfur000330	Acyl-CoA Delta(11) desaturase
			Sfur000334	Collagenase 3
			Sfur000336	Sodium-dependent phosphate transporter 1-A
			Sfur000337	Elongation of very long chain fatty acids protein AAEL008004
			Sfur000338	Ichor
			Sfur000343	Alpha-1,2-mannosyltransferase ALG9
			Sfur000345	TOG array regulator of axonemal microtubules protein 2
			Sfur000347	NAD(P) transhydrogenase, mitochondrial
			Sfur000349	Protein takeout
			Sfur000350	Putative uncharacterized protein
			Sfur000352	Protein takeout
			Sfur000360	Protein ALP1-like
			Sfur000363	Cilia- and flagella-associated protein 300
			Sfur000371	Forkhead box protein N1
			Sfur000372	Cystathionine gamma-lyase
			Sfur000373	Oxidation resistance protein 1
			Sfur000380	S-phase kinase-associated protein 2
			Sfur000386	Acyl-coenzyme A thioesterase 13
			Sfur000387	Circadian clock-controlled protein daywake
			Sfur000392	Endoplasmin
			Sfur000393	Protein takeout
			Sfur000398	Pancreatic lipase-related protein 2
			Sfur000400	Elongation of very long chain fatty acids protein AAEL008004
			Sfur000401	Putative uncharacterized protein
			Sfur000405	Polypyrimidine tract-binding protein 1
			Sfur000419	Calreticulin
			Sfur000422	MFS-type transporter SLC18B1
			Sfur000423	Putative uncharacterized protein
			Sfur000426	Protein takeout
			Sfur000443	Probable small nuclear ribonucleoprotein Sm D2
			Sfur000444	Putative uncharacterized protein
			Sfur000445	Putative uncharacterized protein
			Sfur000450	G-patch domain and KOW motifs-containing protein
			Sfur000460	Putative uncharacterized protein
			Sfur000471	Bifunctional purine biosynthesis protein ATIC
			Sfur000472	Putative uncharacterized protein
			Sfur000480	Probable aminopeptidase NPEPL1
			Sfur000483	Pyruvate kinase
			Sfur000490	Multiple inositol polyphosphate phosphatase 1
			Sfur000492	Vacuolar protein sorting-associated protein 13
			Sfur000504	Carbonic anhydrase 1
			Sfur000511	Calexcitin-1
			Sfur000523	Putative uncharacterized protein
			Sfur000526	Phospholipase A2 OS2
			Sfur000531	Lysophospholipid acyltransferase 7
			Sfur000538	Dopamine N-acetyltransferase
			Sfur000539	Putative uncharacterized protein
			Sfur000547	Coiled-coil domain-containing protein 96
			Sfur000549	Serine-threonine kinase receptor-associated protein
			Sfur000558	Putative uncharacterized protein
			Sfur000560	Tektin-4
			Sfur000565	Sorting nexin-4
			Sfur000582	Putative uncharacterized protein
			Sfur000584	Putative uncharacterized protein
			Sfur000597	Lactosylceramide 4-alpha-galactosyltransferase
			Sfur000598	Solute carrier family 46 member 3
			Sfur000602	Protein yellow
			Sfur000605	Putative uncharacterized protein
			Sfur000608	Plasma kallikrein
			Sfur000611	-
			Sfur000616	Tubulin beta-4B chain
			Sfur000619	Dynein heavy chain, cytoplasmic
			Sfur000626	Tropomodulin
			Sfur000628	Putative uncharacterized protein
			Sfur000630	Putative uncharacterized protein
			Sfur000643	Protein scarlet
			Sfur000649	Glycerol-3-phosphate dehydrogenase [NAD(+)], cytoplasmic
			Sfur000653	Peroxidase
			Sfur000667	Poly(rC)-binding protein 3
			Sfur000672	Serine/arginine-rich splicing factor 2
			Sfur000694	Putative uncharacterized protein
			Sfur000702	Synaptic vesicle glycoprotein 2C
			Sfur000705	Putative uncharacterized protein
			Sfur000706	Protein yellow
			Sfur000719	Putative uncharacterized protein
			Sfur000721	Mediator of RNA polymerase II transcription subunit 21
			Sfur000726	UNC93-like protein MFSD11
			Sfur000729	Protein HIRA
			Sfur000732	Putative uncharacterized protein
			Sfur000733	Probable aminopeptidase NPEPL1
			Sfur000734	Putative uncharacterized protein
			Sfur000736	Centrosomal protein 20
			Sfur000748	Putative uncharacterized protein
			Sfur000753	DNA-directed RNA polymerase III subunit RPC6
			Sfur000763	Putative uncharacterized protein
			Sfur000770	Transmembrane protein 165
			Sfur000791	Facilitated trehalose transporter Tret1
			Sfur000792	Cilia- and flagella-associated protein 52
			Sfur000803	E3 ubiquitin-protein ligase UHRF1
			Sfur000804	Myosin-9
			Sfur000805	Putative uncharacterized protein
			Sfur000807	Spaetzle-processing enzyme
			Sfur000808	5'-3' exonuclease PLD3
			Sfur000815	Methylglutaconyl-CoA hydratase, mitochondrial
			Sfur000818	Glutaminyl-peptide cyclotransferase
			Sfur000821	L-xylulose reductase
			Sfur000824	Putative uncharacterized protein
			Sfur000826	Putative uncharacterized protein
			Sfur000832	Putative uncharacterized protein
			Sfur000852	L-xylulose reductase
			Sfur000858	Putative uncharacterized protein
			Sfur000865	Putative uncharacterized protein
			Sfur000867	Signal peptidase complex catalytic subunit SEC11A
			Sfur000870	4-hydroxy-2-oxoglutarate aldolase, mitochondrial
			Sfur000873	Putative uncharacterized protein
			Sfur000874	Ubiquitin carboxyl-terminal hydrolase 2
			Sfur000882	Putative uncharacterized protein
			Sfur000883	Putative uncharacterized protein
			Sfur000889	Putative uncharacterized protein
			Sfur000894	Putative uncharacterized protein
			Sfur000897	Signal recognition particle 19 kDa protein
			Sfur000898	Probable pyruvate dehydrogenase E1 component subunit alpha, mitochondrial
			Sfur000901	Putative uncharacterized protein
			Sfur000902	Myosin light chain 1
			Sfur000904	Putative uncharacterized protein
			Sfur000915	Putative uncharacterized protein
			Sfur000917	Putative uncharacterized protein
			Sfur000923	Protein yellow
			Sfur000927	MRG/MORF4L-binding protein
			Sfur000934	Putative uncharacterized protein
			Sfur000935	Thyrotropin-releasing hormone-degrading ectoenzyme
			Sfur000966	Metalloendopeptidase OMA1, mitochondrial
			Sfur000970	Myosin heavy chain, non-muscle
			Sfur000977	WD repeat-containing protein 13
			Sfur000978	Putative uncharacterized protein
			Sfur000982	Lethal(2) giant larvae protein
			Sfur000997	PHD finger protein 14
			Sfur001000	Aquaporin
			Sfur001001	Scavenger receptor class B member 1
			Sfur001004	V-type proton ATPase 116 kDa subunit a isoform 4
			Sfur001006	Putative uncharacterized protein
			Sfur001021	Cytochrome P450 4c3
			Sfur001024	Alkaline phosphatase, tissue-nonspecific isozyme
			Sfur001025	Fatty acyl-CoA reductase wat
			Sfur001026	Putative uncharacterized protein
			Sfur001038	Putative uncharacterized protein
			Sfur001043	ER lumen protein-retaining receptor
			Sfur001066	Putative uncharacterized protein
			Sfur001067	Probable chitinase 10
			Sfur001091	Spaetzle-processing enzyme
			Sfur001100	Protein ELYS
			Sfur001103	Putative uncharacterized protein
			Sfur001114	Putative uncharacterized protein
			Sfur001116	Dynein light chain 1, cytoplasmic
			Sfur001129	Cytokine-inducible SH2-containing protein
			Sfur001132	2-oxo-4-hydroxy-4-carboxy-5-ureidoimidazoline decarboxylase
			Sfur001136	Putative uncharacterized protein
			Sfur001142	N-acetyltransferase ESCO2
			Sfur001144	Heterogeneous nuclear ribonucleoprotein 87F
			Sfur001151	Protein disulfide-isomerase A3
			Sfur001154	Retinol dehydrogenase 13
			Sfur001156	A-kinase anchor protein 14
			Sfur001160	Putative uncharacterized protein
			Sfur001173	Putative uncharacterized protein
			Sfur001188	Putative uncharacterized protein
			Sfur001205	Aldo-keto reductase family 1 member B1
			Sfur001206	Protein timeless homolog
			Sfur001235	Putative uncharacterized protein
			Sfur001236	Symplekin
			Sfur001248	Putative uncharacterized protein
			Sfur001250	Calumenin-B
			Sfur001254	Probable cytochrome P450 301a1, mitochondrial
			Sfur001261	Ets DNA-binding protein pokkuri
			Sfur001284	Glutaredoxin domain-containing cysteine-rich protein CG31559
			Sfur001295	Torso-like protein
			Sfur001301	Dynein heavy chain 1, axonemal
			Sfur001305	Protein goliath
			Sfur001309	Venom carboxylesterase-6
			Sfur001311	Glutaredoxin domain-containing cysteine-rich protein CG31559
			Sfur001313	Protein inscuteable homolog
			Sfur001318	Neurobeachin
			Sfur001320	Centrosomal protein of 135 kDa
			Sfur001323	Transcription factor SOX-6
			Sfur001333	Retinol dehydrogenase 14
			Sfur001337	Putative uncharacterized protein
			Sfur001356	Nose resistant to fluoxetine protein 6
			Sfur001357	Tryptophan 2,3-dioxygenase
			Sfur001362	Putative uncharacterized protein
			Sfur001363	Myotubularin-related protein 2
			Sfur001369	Phospholipase A-2-activating protein
			Sfur001371	Myosin light chain kinase, smooth muscle
			Sfur001372	Nose resistant to fluoxetine protein 6
			Sfur001376	V-type proton ATPase subunit G
			Sfur001378	Putative uncharacterized protein
			Sfur001382	Putative uncharacterized protein
			Sfur001384	Putative uncharacterized protein
			Sfur001388	Putative uncharacterized protein
			Sfur001398	Regulator of telomere elongation helicase 1 homolog
			Sfur001403	Nose resistant to fluoxetine protein 6
			Sfur001405	Putative OPA3-like protein CG13603
			Sfur001410	Venom carboxylesterase-6
			Sfur001412	Protein O-mannosyl-transferase Tmtc3
			Sfur001415	Patatin-like phospholipase domain-containing protein 2
			Sfur001416	Putative uncharacterized protein
			Sfur001418	Elongation of very long chain fatty acids protein AAEL008004
			Sfur001421	Translocon-associated protein subunit gamma
			Sfur001428	Vascular endothelial growth factor A
			Sfur001439	Troponin T
			Sfur001442	Venom carboxylesterase-6
			Sfur001462	Ets DNA-binding protein pokkuri
			Sfur001468	Elongation of very long chain fatty acids protein 4
			Sfur001474	Anaphase-promoting complex subunit 4
			Sfur001475	Venom carboxylesterase-6
			Sfur001478	REPTOR-binding partner
			Sfur001483	Putative uncharacterized protein
			Sfur001496	AN1-type zinc finger protein 2B
			Sfur001505	Venom carboxylesterase-6
			Sfur001506	Cleavage and polyadenylation specificity factor subunit 6
			Sfur001516	Putative uncharacterized protein
			Sfur001520	Endochitinase
			Sfur001522	Muscle-specific protein 20
			Sfur001530	Putative uncharacterized protein
			Sfur001531	Coatomer subunit beta
			Sfur001537	Elongin-C
			Sfur001541	Neurobeachin
			Sfur001547	Lysoplasmalogenase-like protein TMEM86A
			Sfur001550	Putative uncharacterized protein
			Sfur001556	Nose resistant to fluoxetine protein 6
			Sfur001562	Serine protease hepsin
			Sfur001563	Growth arrest-specific protein 2
			Sfur001569	Protein cramped-like
			Sfur001572	Torso-like protein
			Sfur001573	O-acyltransferase like protein
			Sfur001588	Neurobeachin
			Sfur001590	Lipase 1
			Sfur001591	Sodium/hydrogen exchanger 10
			Sfur001592	Putative uncharacterized protein
			Sfur001608	Neurobeachin
			Sfur001614	Probable cytochrome P450 49a1
			Sfur001616	Putative uncharacterized protein
			Sfur001617	Venom carboxylesterase-6
			Sfur001629	LIRP
			Sfur001630	Putative uncharacterized protein
			Sfur001637	Zinc finger MYND domain-containing protein 10
			Sfur001638	Clavesin-2
			Sfur001643	Alpha-N-acetylgalactosaminidase
			Sfur001650	Glucosamine-6-phosphate isomerase
			Sfur001652	Spectrin alpha chain
			Sfur001656	Soma ferritin
			Sfur001670	Chitooligosaccharidolytic beta-N-acetylglucosaminidase
			Sfur001672	Lutropin-choriogonadotropic hormone receptor
			Sfur001673	Putative uncharacterized protein
			Sfur001677	Putative uncharacterized protein
			Sfur001678	Krueppel homolog 2
			Sfur001681	Signal peptidase complex subunit 3
			Sfur001686	Protein krueppel
			Sfur001691	Peroxisomal membrane protein PEX16
			Sfur001692	O-acyltransferase like protein
			Sfur001698	Putative uncharacterized protein
			Sfur001718	Putative uncharacterized protein
			Sfur001727	Poly(U)-specific endoribonuclease homolog
			Sfur001743	Probable 3',5'-cyclic phosphodiesterase pde-5
			Sfur001745	Protein takeout
			Sfur001774	Putative uncharacterized protein
			Sfur001783	Serine proteinase stubble
			Sfur001789	Putative uncharacterized protein
			Sfur001804	Tektin-3
			Sfur001806	Monocarboxylate transporter 10
			Sfur001817	Putative uncharacterized protein
			Sfur001825	Condensin complex subunit 3
			Sfur001830	E3 ubiquitin-protein ligase lubel
			Sfur001835	Glycoprotein 3-alpha-L-fucosyltransferase A
			Sfur001843	Putative uncharacterized protein
			Sfur001848	Asparagine synthetase [glutamine-hydrolyzing]
			Sfur001859	Protein FAM98A
			Sfur001869	Actin-5C
			Sfur001888	Putative uncharacterized protein
			Sfur001898	Gamma-aminobutyric acid type B receptor subunit 1
			Sfur001899	Cysteine sulfinic acid decarboxylase
			Sfur001901	Probable ATP-dependent RNA helicase DDX60
			Sfur001906	Brefeldin A-inhibited guanine nucleotide-exchange protein 1
			Sfur001911	Brevican core protein
			Sfur001915	ATP-binding cassette sub-family G member 4
			Sfur001919	Transcription factor Sox-9-A
			Sfur001924	Putative uncharacterized protein
			Sfur001926	Myosin-I heavy chain
			Sfur001931	N-acetylgalactosaminyltransferase 7
			Sfur001932	Cyclin-dependent kinase 14
			Sfur001943	IQ domain-containing protein K
			Sfur001961	Potassium channel KOR1
			Sfur001964	Putative uncharacterized protein
			Sfur001968	Putative uncharacterized protein
			Sfur001969	Glutamate receptor ionotropic, kainate 2
			Sfur001975	Coiled-coil domain-containing protein 103
			Sfur001979	-
			Sfur001981	Putative uncharacterized protein
			Sfur001985	Frizzled-2
			Sfur001994	Fatty acyl-CoA reductase 1
			Sfur001996	Putative uncharacterized protein
			Sfur001997	Putative inorganic phosphate cotransporter
			Sfur001998	Mitochondrial thiamine pyrophosphate carrier
			Sfur002001	Transposon Tf2-11 polyprotein
			Sfur002002	Putative uncharacterized protein
			Sfur002027	Alpha,alpha-trehalose-phosphate synthase [UDP-forming]
			Sfur002037	Putative uncharacterized protein
			Sfur002041	Glucose-6-phosphate isomerase
			Sfur002054	Knirps-related protein
			Sfur002063	Putative uncharacterized protein
			Sfur002064	Methanethiol oxidase
			Sfur002072	Palmitoyl-protein thioesterase 1
			Sfur002073	Diphosphoinositol polyphosphate phosphohydrolase 1
			Sfur002078	Juvenile hormone acid O-methyltransferase
			Sfur002082	Luciferin sulfotransferase
			Sfur002087	Putative uncharacterized protein
			Sfur002093	Alanine--glyoxylate aminotransferase 2, mitochondrial
			Sfur002098	Coiled-coil domain-containing protein 113
			Sfur002105	Phospholipase A1 2
			Sfur002128	Tyrosine-protein phosphatase Lar
			Sfur002132	Translocon-associated protein subunit alpha
			Sfur002145	Phenoloxidase-activating factor 2
			Sfur002153	Putative uncharacterized protein
			Sfur002158	Dynamin-1-like protein
			Sfur002165	ATP-binding cassette sub-family G member 4
			Sfur002167	DNA topoisomerase 2
			Sfur002175	Heparan sulfate 2-O-sulfotransferase pipe
			Sfur002179	Putative uncharacterized protein
			Sfur002180	Alanine aminotransferase 1
			Sfur002182	Putative uncharacterized protein
			Sfur002187	Kelch-like protein 10
			Sfur002192	Putative uncharacterized protein
			Sfur002196	Putative uncharacterized protein
			Sfur002197	ATP-binding cassette sub-family G member 1
			Sfur002202	Tyrosine-protein kinase Src64B
			Sfur002221	Putative uncharacterized protein
			Sfur002233	Hexokinase
			Sfur002235	Leukocyte receptor cluster member 8
			Sfur002256	Putative uncharacterized protein
			Sfur002272	Tubulin alpha-1 chain
			Sfur002275	Putative uncharacterized protein
			Sfur002283	Kinesin-like protein CG14535
			Sfur002293	Myelin expression factor 2
			Sfur002300	Zinc metalloproteinase nas-14
			Sfur002307	POU domain, class 2, transcription factor 1
			Sfur002309	Aldose reductase-related protein 2
			Sfur002315	DNA replication licensing factor MCM4
			Sfur002318	Intraflagellar transport protein 172 homolog
			Sfur002323	Serine/threonine-protein kinase MAK
			Sfur002336	Cadherin-related tumor suppressor
			Sfur002340	Protein O-mannosyl-transferase TMTC4
			Sfur002344	Denticleless protein homolog
			Sfur002358	Sodium-coupled monocarboxylate transporter 2
			Sfur002371	GTP-binding protein GEM
			Sfur002394	Anoctamin-1
			Sfur002398	Zinc finger homeobox protein 3
			Sfur002402	Putative uncharacterized protein
			Sfur002404	Putative uncharacterized protein
			Sfur002413	Tektin-B1
			Sfur002423	Cytochrome P450 4V2
			Sfur002437	Cyclin-dependent kinase 9
			Sfur002443	E3 ubiquitin-protein ligase znrf2
			Sfur002456	Coiled-coil domain-containing protein 85C-B
			Sfur002465	Putative uncharacterized protein
			Sfur002482	Putative uncharacterized protein
			Sfur002488	Elongation of very long chain fatty acids protein 7
			Sfur002492	G-protein coupled receptor GRL101
			Sfur002494	Putative uncharacterized protein
			Sfur002497	Putative uncharacterized protein
			Sfur002511	Cilia- and flagella-associated protein 70
			Sfur002528	Fatty acid synthase
			Sfur002533	Putative uncharacterized protein
			Sfur002537	Mitochondrial uncoupling protein Bmcp
			Sfur002545	Putative uncharacterized protein
			Sfur002548	Putative uncharacterized protein
			Sfur002549	Putative uncharacterized protein
			Sfur002555	Actin-related protein 2/3 complex subunit 1A-B
			Sfur002558	Protein disulfide-isomerase
			Sfur002569	Purine nucleoside phosphorylase
			Sfur002587	Putative uncharacterized protein
			Sfur002599	Craniofacial development protein 2
			Sfur002601	Ribonucleoside-diphosphate reductase subunit M2
			Sfur002609	Zinc transporter ZIP9
			Sfur002616	Alanine aminotransferase 2-like
			Sfur002619	snRNA-activating protein complex subunit 3
			Sfur002645	Aprataxin
			Sfur002652	Lysosomal-trafficking regulator
			Sfur002664	Iron-sulfur protein NUBPL
			Sfur002672	Low-density lipoprotein receptor-related protein 2
			Sfur002673	Tubulin beta chain
			Sfur002688	Putative uncharacterized protein
			Sfur002689	Lipase member H
			Sfur002695	Putative uncharacterized protein
			Sfur002696	Tubulin alpha-1 chain
			Sfur002703	Putative uncharacterized protein
			Sfur002724	Calpain-C
			Sfur002730	Serine hydrolase-like protein
			Sfur002739	BTB/POZ domain-containing protein 2
			Sfur002746	Very-long-chain 3-oxoacyl-CoA reductase
			Sfur002752	Plasma membrane calcium-transporting ATPase 1
			Sfur002767	Tyrosine-protein kinase Src64B
			Sfur002772	Circadian locomoter output cycles protein kaput
			Sfur002786	Malate dehydrogenase, mitochondrial
			Sfur002817	Probable NADH dehydrogenase [ubiquinone] 1 alpha subcomplex subunit 12
			Sfur002827	UBX domain-containing protein 1
			Sfur002833	Protein embryonic gonad
			Sfur002834	Peptidyl-prolyl cis-trans isomerase H
			Sfur002836	Formylglycine-generating enzyme
			Sfur002847	Putative uncharacterized protein
			Sfur002850	Pancreatic lipase-related protein 2
			Sfur002859	Putative uncharacterized protein
			Sfur002862	Fatty acyl-CoA reductase 1
			Sfur002864	2-oxoglutarate and iron-dependent oxygenase domain-containing protein 3
			Sfur002884	Ninein-like protein
			Sfur002888	Sodium/calcium exchanger 1
			Sfur002894	BTB/POZ domain-containing protein 19
			Sfur002897	Enoyl-CoA delta isomerase 2
			Sfur002901	Cadherin-related tumor suppressor
			Sfur002907	Putative uncharacterized protein
			Sfur002923	Polypeptide N-acetylgalactosaminyltransferase 2
			Sfur002924	Phenoloxidase-activating factor 2
			Sfur002946	Activating transcription factor 7-interacting protein 1
			Sfur002960	Noggin
			Sfur002967	Dynein intermediate chain 3, ciliary
			Sfur002974	Pancreatic triacylglycerol lipase (Fragment)
			Sfur002977	ATP-binding cassette sub-family G member 1
			Sfur002981	Venom acid phosphatase Acph-1
			Sfur003002	ATP-dependent RNA helicase A
			Sfur003008	TLC domain-containing protein 5
			Sfur003019	Lipase member H-B
			Sfur003025	Actin-like protein 6B
			Sfur003040	Kinesin-like protein KIF23
			Sfur003053	Putative uncharacterized protein
			Sfur003057	Kelch-like protein 10
			Sfur003061	Putative uncharacterized protein
			Sfur003068	Protein THEM6
			Sfur003077	DNA cross-link repair 1A protein
			Sfur003085	Putative uncharacterized protein
			Sfur003094	Cadherin-related tumor suppressor
			Sfur003099	Glutamate receptor ionotropic, NMDA 2B
			Sfur003100	Protein peste
			Sfur003112	Protein brunelleschi
			Sfur003132	Sodium-dependent dopamine transporter
			Sfur003135	Protein phosphatase 1 regulatory subunit 42
			Sfur003138	Probable G-protein coupled receptor Mth-like 1
			Sfur003158	Luciferin sulfotransferase
			Sfur003159	Probable cytochrome P450 6a14
			Sfur003161	Lymphokine-activated killer T-cell-originated protein kinase
			Sfur003164	Zinc metalloproteinase nas-14
			Sfur003165	Putative uncharacterized protein
			Sfur003173	Parathyroid hormone/parathyroid hormone-related peptide receptor
			Sfur003180	Putative uncharacterized protein
			Sfur003182	Superoxide dismutase [Cu-Zn]
			Sfur003185	Protein HGH1 homolog
			Sfur003192	UDP-glycosyltransferase UGT5
			Sfur003196	G-protein coupled receptor Mth2
			Sfur003200	eIF-2-alpha kinase activator GCN1
			Sfur003201	L-ascorbate oxidase
			Sfur003211	tRNA (adenine(58)-N(1))-methyltransferase catalytic subunit TRMT61A
			Sfur003212	Sodium- and chloride-dependent GABA transporter ine
			Sfur003232	Protein-lysine N-methyltransferase EEF2KMT
			Sfur003236	Putative uncharacterized protein
			Sfur003254	Putative uncharacterized protein
			Sfur003256	Replication factor C subunit 5
			Sfur003257	Annexin B10
			Sfur003263	Endoplasmic reticulum resident protein 44
			Sfur003266	A-kinase anchor protein 1, mitochondrial
			Sfur003275	Cytochrome b5-related protein
			Sfur003281	Putative uncharacterized protein
			Sfur003283	Putative uncharacterized protein
			Sfur003300	Ecdysone-induced protein 75B, isoform B
			Sfur003307	Probable G-protein coupled receptor Mth-like 11
			Sfur003310	Glycine receptor subunit alpha-2
			Sfur003311	Putative uncharacterized protein
			Sfur003318	Putative uncharacterized protein
			Sfur003329	Syntaxin-1A
			Sfur003342	Putative uncharacterized protein
			Sfur003362	Phospholipase A2 isozymes PA3A/PA3B/PA5
			Sfur003366	Cytochrome b5-related protein
			Sfur003369	UDP-glycosyltransferase UGT5
			Sfur003370	DNA ligase 1
			Sfur003371	Amyloid protein-binding protein 2
			Sfur003374	Separin
			Sfur003392	Putative uncharacterized protein
			Sfur003408	Mitotic spindle assembly checkpoint protein MAD2A
			Sfur003410	Ral GTPase-activating protein subunit beta
			Sfur003418	Putative uncharacterized protein
			Sfur003424	SEC14-like protein 1
			Sfur003434	Magnesium-dependent phosphatase 1
			Sfur003437	Putative uncharacterized protein
			Sfur003442	-
			Sfur003462	Carboxypeptidase M
			Sfur003468	Ecdysone-induced protein 75B, isoform A
			Sfur003469	SH3 domain-containing protein Dlish
			Sfur003473	Cilia- and flagella-associated protein 299
			Sfur003489	Putative uncharacterized protein
			Sfur003501	Cytochrome P450 4V2
			Sfur003502	Serine/threonine-protein kinase NLK
			Sfur003508	Putative uncharacterized protein
			Sfur003516	Putative uncharacterized protein
			Sfur003517	Lysosome membrane protein 2
			Sfur003519	tRNA (uracil-5-)-methyltransferase homolog A
			Sfur003520	Putative uncharacterized protein
			Sfur003528	Transcription initiation factor TFIID subunit 2
			Sfur003542	PRKR-interacting protein 1 homolog
			Sfur003547	Zinc metalloproteinase nas-13
			Sfur003548	Septin-4
			Sfur003563	Calcineurin-binding protein cabin-1
			Sfur003576	G-protein coupled receptor Mth2
			Sfur003580	E3 ubiquitin-protein ligase MARCHF3
			Sfur003582	NAD(+) hydrolase sarm1
			Sfur003598	Protein deltex
			Sfur003607	RNA-binding protein cabeza
			Sfur003642	Putative uncharacterized protein
			Sfur003650	Dynamin-1-like protein
			Sfur003655	Rotatin
			Sfur003657	E3 ubiquitin-protein ligase MARCHF2
			Sfur003658	Smoothelin
			Sfur003664	Tectonin beta-propeller repeat-containing protein
			Sfur003666	Syntaxin-1A
			Sfur003677	Retinol dehydrogenase 14
			Sfur003690	Apolipoprotein D
			Sfur003695	Protein singles bar
			Sfur003700	Estradiol 17-beta-dehydrogenase 11
			Sfur003703	Probable serine/threonine-protein kinase ireA
			Sfur003704	Putative uncharacterized protein
			Sfur003710	Paxillin
			Sfur003730	Scoloptoxin SSD14
			Sfur003731	Paxillin
			Sfur003749	RNA-binding protein with serine-rich domain 1-A
			Sfur003751	Putative uncharacterized protein
			Sfur003752	Putative uncharacterized protein
			Sfur003756	Vesicular glutamate transporter 3
			Sfur003758	Putative uncharacterized protein
			Sfur003759	FACT complex subunit Ssrp1
			Sfur003762	Putative uncharacterized protein
			Sfur003764	Putative uncharacterized protein
			Sfur003765	Solute carrier family 2, facilitated glucose transporter member 4
			Sfur003768	E3 ubiquitin-protein ligase Bre1
			Sfur003772	Putative uncharacterized protein
			Sfur003782	G-protein coupled receptor Mth2
			Sfur003784	Neuferricin
			Sfur003786	Parathyroid hormone/parathyroid hormone-related peptide receptor
			Sfur003789	tRNA (cytosine(72)-C(5))-methyltransferase NSUN6
			Sfur003790	Putative uncharacterized protein
			Sfur003791	Putative uncharacterized protein
			Sfur003793	Luciferin sulfotransferase
			Sfur003810	Putative uncharacterized protein
			Sfur003819	CD63 antigen
			Sfur003827	Putative uncharacterized protein
			Sfur003828	Cytochrome P450 306a1
			Sfur003837	Putative uncharacterized protein
			Sfur003860	Chaperone protein DnaJ
			Sfur003875	Pro-resilin
			Sfur003906	Lipase 1
			Sfur003909	Lipase 3
			Sfur003933	Proteasome subunit alpha type-6
			Sfur003936	Putative uncharacterized protein
			Sfur003956	Putative uncharacterized protein
			Sfur003977	Protein takeout
			Sfur003979	Pancreatic lipase-related protein 2
			Sfur003989	Lysine histidine transporter 2
			Sfur003997	Protein serrate
			Sfur004002	Peroxiredoxin 1
			Sfur004029	Serine/threonine-protein phosphatase PP1-gamma catalytic subunit A
			Sfur004035	Muscle LIM protein Mlp84B
			Sfur004042	Broad-complex core protein isoforms 1/2/3/4/5
			Sfur004061	Putative uncharacterized protein
			Sfur004072	High affinity cationic amino acid transporter 1
			Sfur004083	Mortality factor 4-like protein 1
			Sfur004096	Calcitonin gene-related peptide type 1 receptor
			Sfur004099	Protein melted
			Sfur004104	High affinity cationic amino acid transporter 1
			Sfur004107	Putative uncharacterized protein
			Sfur004109	Adenylate cyclase type 9
			Sfur004136	Tetratricopeptide repeat protein 36
			Sfur004148	C1GALT1-specific chaperone 1-like protein
			Sfur004150	Patched domain-containing protein 3
			Sfur004151	Echinoderm microtubule-associated protein-like CG42247
			Sfur004154	Protein melted
			Sfur004157	Serine/threonine-protein phosphatase PP1-gamma catalytic subunit A
			Sfur004159	Dynactin subunit 2
			Sfur004163	Putative uncharacterized protein
			Sfur004182	Putative uncharacterized protein
			Sfur004207	Death-associated protein kinase related
			Sfur004212	High affinity cationic amino acid transporter 1
			Sfur004217	Putative uncharacterized protein
			Sfur004220	Putative uncharacterized protein
			Sfur004223	Serine/threonine-protein kinase 17A
			Sfur004225	Calmodulin-binding transcription activator 1
			Sfur004229	Collagen alpha-3(VI) chain
			Sfur004232	Echinoderm microtubule-associated protein-like CG42247
			Sfur004248	AP-2 complex subunit mu
			Sfur004267	Mortality factor 4-like protein 1
			Sfur004288	SOSS complex subunit C
			Sfur004295	Fibulin-7
			Sfur004313	Putative uncharacterized protein
			Sfur004314	Putative uncharacterized protein
			Sfur004324	Putative uncharacterized protein
			Sfur004330	Ejaculatory bulb-specific protein 3
			Sfur004335	Myosin-IIIa
			Sfur004336	Ejaculatory bulb-specific protein 3
			Sfur004371	Testis-specific serine/threonine-protein kinase 4
			Sfur004373	Ras GTPase-activating-like protein IQGAP1
			Sfur004380	Putative uncharacterized protein
			Sfur004407	Xanthine dehydrogenase
			Sfur004410	Farnesyl pyrophosphate synthase
			Sfur004415	Putative uncharacterized protein
			Sfur004421	Mitotic-spindle organizing protein 1
			Sfur004424	Putative uncharacterized protein
			Sfur004433	Putative uncharacterized protein
			Sfur004446	Fibrous sheath-interacting protein 2
			Sfur004450	Transmembrane emp24 domain-containing protein 6
			Sfur004455	Chorion peroxidase
			Sfur004459	N-sulphoglucosamine sulphohydrolase
			Sfur004463	Putative uncharacterized protein
			Sfur004465	Putative uncharacterized protein
			Sfur004469	BTB/POZ domain-containing protein 3
			Sfur004480	Serine protease Hayan
			Sfur004483	Protein limb expression 1 homolog
			Sfur004484	Minor histocompatibility antigen H13
			Sfur004486	Protein SET
			Sfur004494	Putative uncharacterized protein
			Sfur004497	Tctex1 domain-containing protein 2
			Sfur004509	Putative uncharacterized protein
			Sfur004512	Putative uncharacterized protein
			Sfur004514	Putative nuclease HARBI1
			Sfur004521	Ejaculatory bulb-specific protein 3
			Sfur004533	E-selectin
			Sfur004536	Allergen Tha p 1
			Sfur004550	Putative uncharacterized protein
			Sfur004552	Probable cytochrome P450 6a14
			Sfur004563	Thymidine kinase 2, mitochondrial
			Sfur004571	Putative phosphatidate phosphatase
			Sfur004587	Putative uncharacterized protein
			Sfur004598	-
			Sfur004599	Vesicle transport protein USE1
			Sfur004605	Peptidase inhibitor 16
			Sfur004614	Protein dead ringer
			Sfur004627	Cohesin subunit SA-1
			Sfur004630	Putative uncharacterized protein
			Sfur004633	Putative uncharacterized protein
			Sfur004636	Putative uncharacterized protein
			Sfur004642	Cytochrome P450 4C1
			Sfur004647	Peptidyl-prolyl cis-trans isomerase B
			Sfur004656	Peptidyl-prolyl cis-trans isomerase A
			Sfur004671	Venom allergen 5
			Sfur004675	Putative uncharacterized protein
			Sfur004677	Putative uncharacterized protein
			Sfur004681	Sialin
			Sfur004691	Ubiquitin-conjugating enzyme E2 R1
			Sfur004693	Coatomer subunit epsilon
			Sfur004694	Putative uncharacterized protein
			Sfur004696	Coiled-coil domain-containing protein 134
			Sfur004700	Putative uncharacterized protein
			Sfur004705	Putative uncharacterized protein
			Sfur004707	Putative uncharacterized protein
			Sfur004713	Phospholipase B1, membrane-associated
			Sfur004715	Putative uncharacterized protein
			Sfur004720	Defensin
			Sfur004745	Retrovirus-related Pol polyprotein from transposon 297
			Sfur004749	Peroxisomal membrane protein 11B
			Sfur004759	Major facilitator superfamily domain-containing protein 12
			Sfur004761	Tolloid-like protein 1
			Sfur004764	Ran GTPase-activating protein 1
			Sfur004771	Cytochrome P450 4C1
			Sfur004784	Glutamine--fructose-6-phosphate aminotransferase [isomerizing] 2
			Sfur004801	Putative uncharacterized protein
			Sfur004802	WD repeat-containing protein on Y chromosome
			Sfur004809	Pachytene checkpoint protein 2 homolog
			Sfur004816	Putative uncharacterized protein
			Sfur004822	Tyrosine decarboxylase
			Sfur004829	Putative uncharacterized protein
			Sfur004835	Putative ferric-chelate reductase 1 homolog
			Sfur004855	Putative uncharacterized protein
			Sfur004856	Chromobox protein homolog 1
			Sfur004863	Protein transport protein Sec24C
			Sfur004872	High-affinity choline transporter 1
			Sfur004874	Phosphoserine phosphatase
			Sfur004876	Protein patched
			Sfur004883	Probable U3 small nucleolar RNA-associated protein 11
			Sfur004885	17-beta-hydroxysteroid dehydrogenase 13
			Sfur004887	Ethanolamine-phosphate phospho-lyase
			Sfur004897	UBX domain-containing protein 11
			Sfur004900	Fanconi-associated nuclease 1
			Sfur004906	Lipase maturation factor 2
			Sfur004914	THUMP domain-containing protein 3
			Sfur004918	Glucosidase 2 subunit beta
			Sfur004919	LINE-1 retrotransposable element ORF2 protein
			Sfur004921	Lachesin
			Sfur004922	Ejaculatory bulb-specific protein 3
			Sfur004927	Tetratricopeptide repeat protein 25
			Sfur004940	Fanconi anemia group I protein homolog
			Sfur004945	Adenylate kinase 9
			Sfur004946	Sestrin homolog
			Sfur004963	Ejaculatory bulb-specific protein 3
			Sfur004965	Endoplasmic reticulum metallopeptidase 1
			Sfur004988	Indole-3-acetaldehyde oxidase
			Sfur004996	Mitochondrial import inner membrane translocase subunit Tim23
			Sfur005004	Putative uncharacterized protein
			Sfur005008	Zinc finger matrin-type protein CG9776
			Sfur005014	Putative uncharacterized protein
			Sfur005015	CCR4-NOT transcription complex subunit 11
			Sfur005017	Putative uncharacterized protein
			Sfur005022	Transmembrane protein 214-A
			Sfur005023	Muscle-specific protein 20
			Sfur005031	Dolichyl-diphosphooligosaccharide--protein glycosyltransferase subunit DAD1
			Sfur005039	Putative uncharacterized protein
			Sfur005043	Ejaculatory bulb-specific protein 3
			Sfur005046	Tubulin beta-3 chain
			Sfur005048	Kinesin-II 85 kDa subunit
			Sfur005053	Tafazzin homolog
			Sfur005057	Derlin-1
			Sfur005061	Putative uncharacterized protein
			Sfur005064	Protein anon-37Cs
			Sfur005069	Putative uncharacterized protein
			Sfur005091	Putative uncharacterized protein
			Sfur005096	CWF19-like protein 1
			Sfur005101	CDK5 regulatory subunit-associated protein 2
			Sfur005103	Putative uncharacterized protein
			Sfur005107	Angiogenic factor with G patch and FHA domains 1
			Sfur005108	Leukotriene A-4 hydrolase
			Sfur005121	Putative uncharacterized protein
			Sfur005125	Putative uncharacterized protein
			Sfur005126	Venom serine carboxypeptidase
			Sfur005128	Putative uncharacterized protein
			Sfur005136	Putative uncharacterized protein
			Sfur005145	Putative uncharacterized protein
			Sfur005158	Putative uncharacterized protein
			Sfur005167	Kinesin-like protein KIF20B
			Sfur005178	Structural maintenance of chromosomes protein 2
			Sfur005181	Putative uncharacterized protein
			Sfur005183	NADPH oxidase 5
			Sfur005185	Glycogenin-1
			Sfur005188	Biogenesis of lysosome-related organelles complex 1 subunit 4
			Sfur005193	Diphosphomevalonate decarboxylase
			Sfur005195	Leucine-rich repeat-containing protein 23
			Sfur005197	Heparan-alpha-glucosaminide N-acetyltransferase
			Sfur005213	Putative uncharacterized protein
			Sfur005215	Short-chain specific acyl-CoA dehydrogenase, mitochondrial
			Sfur005238	Putative uncharacterized protein
			Sfur005244	Elongation of very long chain fatty acids protein
			Sfur005277	Putative uncharacterized protein
			Sfur005278	Histone H2A.V
			Sfur005279	Glucose-6-phosphate 1-epimerase
			Sfur005283	Transcription factor AP-1
			Sfur005284	Putative uncharacterized protein
			Sfur005293	Transcription factor sem-2
			Sfur005297	Probable RNA-directed DNA polymerase from transposon BS
			Sfur005307	Putative uncharacterized protein
			Sfur005317	Probable cytochrome P450 6a13
			Sfur005323	Myocyte-specific enhancer factor 2
			Sfur005326	T-complex protein 11-like protein 1
			Sfur005328	Proton-coupled folate transporter
			Sfur005329	Phospholipase B1, membrane-associated
			Sfur005332	Neuroglian
			Sfur005336	Glutathione S-transferase
			Sfur005342	Growth arrest and DNA damage-inducible protein GADD45 gamma
			Sfur005353	Putative uncharacterized protein
			Sfur005358	Putative uncharacterized protein
			Sfur005382	Polycystin-2
			Sfur005383	Wiskott-Aldrich syndrome protein family member 1
			Sfur005392	U-scoloptoxin(01)-Cw1a
			Sfur005401	Unconventional myosin-XIX
			Sfur005404	Ribonucleoside-diphosphate reductase large subunit
			Sfur005415	G1/S-specific cyclin-E
			Sfur005445	Peroxiredoxin-4
			Sfur005461	Low-density lipoprotein receptor (Fragment)
			Sfur005462	Replication protein A 70 kDa DNA-binding subunit
			Sfur005470	Putative uncharacterized protein
			Sfur005482	Putative uncharacterized protein
			Sfur005488	Phosphoglycerate kinase 1
			Sfur005498	Putative uncharacterized protein
			Sfur005509	Nicastrin
			Sfur005516	U6 snRNA-associated Sm-like protein LSm6
			Sfur005530	Putative uncharacterized protein
			Sfur005534	Sodium- and chloride-dependent glycine transporter 2
			Sfur005549	Putative uncharacterized protein
			Sfur005554	Carboxypeptidase B
			Sfur005567	Serrate RNA effector molecule homolog
			Sfur005568	Phospholipase B1, membrane-associated
			Sfur005571	Translocon-associated protein subunit beta
			Sfur005578	Glutathione peroxidase 6
			Sfur005579	Organic cation transporter protein
			Sfur005582	Protein broad-minded
			Sfur005584	Alpha-tocopherol transfer protein-like
			Sfur005596	Ankyrin-3
			Sfur005599	Putative uncharacterized protein
			Sfur005617	Putative uncharacterized protein
			Sfur005618	Gonadotropin-releasing hormone II receptor
			Sfur005641	Cytosol aminopeptidase
			Sfur005644	U-scoloptoxin(01)-Cw1a
			Sfur005662	Ejaculatory bulb-specific protein 3
			Sfur005664	Putative glycerol kinase 5
			Sfur005703	Putative uncharacterized protein
			Sfur005709	Dynein light chain roadblock-type 2
			Sfur005716	Progestin and adipoQ receptor family member 3
			Sfur005717	THO complex subunit 6 homolog
			Sfur005721	Protein fem-1 homolog B
			Sfur005723	Troponin C, isoallergen Bla g 6.0201
			Sfur005726	La-related protein 7
			Sfur005737	Putative uncharacterized protein
			Sfur005739	Putative uncharacterized protein
			Sfur005753	Thymidine kinase 2, mitochondrial
			Sfur005765	Putative uncharacterized protein
			Sfur005773	Cytochrome c oxidase subunit 5A, mitochondrial
			Sfur005777	Calcium-independent phospholipase A2-gamma
			Sfur005796	Peptidyl-alpha-hydroxyglycine alpha-amidating lyase 1
			Sfur005803	PDZ domain-containing protein 2
			Sfur005808	Serine proteinase stubble
			Sfur005812	RNA-binding protein spenito
			Sfur005818	Putative uncharacterized protein
			Sfur005823	Putative uncharacterized protein
			Sfur005835	Centromere/kinetochore protein zw10 homolog
			Sfur005842	Protein peste
			Sfur005866	Putative uncharacterized protein
			Sfur005875	Putative uncharacterized protein
			Sfur005877	Putative uncharacterized protein
			Sfur005880	Proliferating cell nuclear antigen
			Sfur005884	Putative uncharacterized protein
			Sfur005885	Counting factor associated protein D
			Sfur005894	Cuticle protein 7
			Sfur005903	Putative uncharacterized protein
			Sfur005907	Luciferin sulfotransferase
			Sfur005909	Cardioacceleratory peptide receptor
			Sfur005914	Putative uncharacterized protein
			Sfur005921	Protein sprint
			Sfur005925	Putative uncharacterized protein
			Sfur005934	Putative uncharacterized protein
			Sfur005937	Cuticle protein 19
			Sfur005959	Transmembrane protein fend
			Sfur005965	Putative uncharacterized protein
			Sfur005967	Cuticle protein 19
			Sfur005970	Tachykinin-like peptides receptor 99D
			Sfur005971	Protein Flattop
			Sfur005972	Cuticle protein 19
			Sfur005981	Tubulin-specific chaperone cofactor E-like protein
			Sfur005985	Translocation protein SEC63 homolog
			Sfur005989	Endocuticle structural glycoprotein SgAbd-2
			Sfur005991	Helix-loop-helix protein delilah
			Sfur005992	Cadherin-23
			Sfur005994	Protein transport protein Sec61 subunit gamma
			Sfur005999	Putative uncharacterized protein
			Sfur006005	Putative uncharacterized protein
			Sfur006006	Putative uncharacterized protein
			Sfur006014	Putative uncharacterized protein
			Sfur006019	Putative uncharacterized protein
			Sfur006029	Putative uncharacterized protein
			Sfur006033	Mitochondrial 2-oxodicarboxylate carrier
			Sfur006039	Cuticle protein
			Sfur006056	Chimeric ERCC6-PGBD3 protein
			Sfur006057	Putative uncharacterized protein
			Sfur006062	Cuticle protein 19
			Sfur006074	Protein TIS11
			Sfur006078	Endocuticle structural glycoprotein SgAbd-2
			Sfur006079	Cilia- and flagella-associated protein 61
			Sfur006084	Putative uncharacterized protein
			Sfur006085	Organic solute transporter alpha-like protein
			Sfur006090	Endocuticle structural glycoprotein SgAbd-8
			Sfur006093	D-beta-hydroxybutyrate dehydrogenase, mitochondrial
			Sfur006097	Putative uncharacterized protein
			Sfur006102	Probable cytochrome P450 49a1
			Sfur006104	Putative uncharacterized protein
			Sfur006106	Dopamine N-acetyltransferase
			Sfur006108	Putative uncharacterized protein
			Sfur006110	Cytosol aminopeptidase
			Sfur006111	Putative uncharacterized protein
			Sfur006117	Luciferin sulfotransferase
			Sfur006119	Putative uncharacterized protein
			Sfur006122	Putative uncharacterized protein
			Sfur006128	Cuticle protein 19
			Sfur006139	Putative uncharacterized protein
			Sfur006140	Putative uncharacterized protein
			Sfur006141	Putative uncharacterized protein
			Sfur006142	Putative uncharacterized protein
			Sfur006149	Helix-loop-helix protein delilah
			Sfur006167	Leucine-rich repeat transmembrane protein FLRT1
			Sfur006173	Putative uncharacterized protein
			Sfur006176	Larval cuticle protein A3A
			Sfur006194	Organic solute transporter alpha-like protein
			Sfur006200	Broad-complex core protein isoforms 1/2/3/4/5
			Sfur006204	Putative uncharacterized protein
			Sfur006208	Putative uncharacterized protein
			Sfur006211	Putative uncharacterized protein
			Sfur006218	Choline/ethanolamine kinase
			Sfur006228	Putative uncharacterized protein
			Sfur006233	Copper-transporting ATPase 1
			Sfur006235	Exportin-2
			Sfur006236	Putative uncharacterized protein
			Sfur006238	Nipped-B-like protein
			Sfur006246	General odorant-binding protein 70
			Sfur006247	Putative uncharacterized protein
			Sfur006248	Protein spaetzle 5
			Sfur006252	Putative uncharacterized protein
			Sfur006256	Symplekin
			Sfur006263	Putative uncharacterized protein
			Sfur006274	Uncharacterized protein CG43867
			Sfur006275	Cytochrome P450 3A11
			Sfur006284	Transmembrane protein fend
			Sfur006287	Protein sprint
			Sfur006300	Lipase 1
			Sfur006303	Putative uncharacterized protein
			Sfur006309	Putative uncharacterized protein
			Sfur006313	Putative uncharacterized protein
			Sfur006317	Putative uncharacterized protein
			Sfur006325	Exportin-2
			Sfur006339	Putative uncharacterized protein
			Sfur006345	Neuroglobin
			Sfur006352	Endocuticle structural glycoprotein SgAbd-9
			Sfur006354	Peroxiredoxin 1
			Sfur006361	Ribosomal RNA small subunit methyltransferase NEP1
			Sfur006364	Cytochrome P450 4C1
			Sfur006367	Anaphase-promoting complex subunit 1
			Sfur006368	Putative uncharacterized protein
			Sfur006371	Hypoxia up-regulated protein 1
			Sfur006372	Neprilysin-11
			Sfur006373	Putative uncharacterized protein
			Sfur006374	Leucine-rich repeat-containing protein 71
			Sfur006377	SH3 domain-containing protein Dlish
			Sfur006378	Radial spoke head protein 3 homolog
			Sfur006380	Protein transport protein Sec61 subunit alpha isoform 2
			Sfur006381	Pupal cuticle protein 36
			Sfur006389	Fatty acyl-CoA reductase wat
			Sfur006390	Putative uncharacterized protein
			Sfur006399	Putative uncharacterized protein
			Sfur006404	RYamide receptor
			Sfur006408	Neurotrophin 1
			Sfur006409	Putative uncharacterized protein
			Sfur006413	Transmembrane protein fend
			Sfur006417	Netrin receptor UNC5B
			Sfur006419	Putative uncharacterized protein
			Sfur006421	Cytochrome P450 4C1
			Sfur006423	Phosphatidylinositol 4-kinase alpha
			Sfur006427	Insulin-like receptor
			Sfur006431	Putative uncharacterized protein
			Sfur006433	PI-PLC X domain-containing protein 1
			Sfur006444	Putative uncharacterized protein
			Sfur006447	Cyclin-dependent kinase 9-B
			Sfur006451	Putative uncharacterized protein
			Sfur006454	Putative uncharacterized protein
			Sfur006457	Putative uncharacterized protein
			Sfur006461	Putative uncharacterized protein
			Sfur006468	BTB/POZ domain-containing protein 6
			Sfur006476	Putative uncharacterized protein
			Sfur006482	Protein sprint
			Sfur006487	Armadillo repeat-containing protein 2
			Sfur006488	Gamma-butyrobetaine dioxygenase
			Sfur006489	Dual specificity protein phosphatase 14
			Sfur006493	Protein lethal(3)malignant blood neoplasm 1
			Sfur006494	Putative uncharacterized protein
			Sfur006496	Protein sprint
			Sfur006499	Dopamine N-acetyltransferase
			Sfur006506	Helix-loop-helix protein delilah
			Sfur006509	Putative uncharacterized protein
			Sfur006511	Putative uncharacterized protein
			Sfur006520	Putative uncharacterized protein
			Sfur006521	Putative uncharacterized protein
			Sfur006522	Putative uncharacterized protein
			Sfur006523	Putative uncharacterized protein
			Sfur006528	Putative uncharacterized protein
			Sfur006530	Putative uncharacterized protein
			Sfur006536	Hapless 2
			Sfur006538	Carbonic anhydrase 9
			Sfur006539	Alpha-tocopherol transfer protein
			Sfur006540	Uncharacterized protein K02A2.6
			Sfur006579	Chimeric ERCC6-PGBD3 protein
			Sfur006592	Putative uncharacterized protein
			Sfur006594	3'-5' RNA helicase YTHDC2
			Sfur006608	Chromatin assembly factor 1 subunit A-A
			Sfur006611	Regucalcin
			Sfur006618	Putative uncharacterized protein
			Sfur006631	Synaptic vesicle glycoprotein 2B
			Sfur006635	Polyubiquitin-A
			Sfur006653	Interferon-related developmental regulator 2
			Sfur006678	Putative uncharacterized protein
			Sfur006684	Nose resistant to fluoxetine protein 6
			Sfur006696	DmX-like protein 2
			Sfur006701	Alpha-tocopherol transfer protein-like
			Sfur006704	Activating signal cointegrator 1 complex subunit 3
			Sfur006712	Structural maintenance of chromosomes protein 4
			Sfur006715	Chondroitin sulfate synthase 1
			Sfur006724	Neuroendocrine convertase 1
			Sfur006727	Putative uncharacterized protein
			Sfur006731	Elongation of very long chain fatty acids protein 4
			Sfur006735	Probable phosphoglycerate kinase
			Sfur006756	Putative fatty acyl-CoA reductase CG5065
			Sfur006762	Putative uncharacterized protein
			Sfur006769	Putative uncharacterized protein
			Sfur006772	Fatty acyl-CoA reductase wat
			Sfur006774	Programmed cell death protein 7
			Sfur006779	Putative uncharacterized protein
			Sfur006780	Putative uncharacterized protein
			Sfur006786	Alpha-tocopherol transfer protein-like
			Sfur006792	Putative uncharacterized protein
			Sfur006821	Casein kinase I isoform gamma-1
			Sfur006825	Retinol-binding protein pinta
			Sfur006826	Transcription elongation factor 1 homolog
			Sfur006836	Putative uncharacterized protein
			Sfur006841	Prostaglandin E synthase
			Sfur006845	Nuclear cap-binding protein subunit 1
			Sfur006847	Probable cytochrome P450 6d4
			Sfur006861	Alpha-tocopherol transfer protein-like
			Sfur006865	Casein kinase I isoform gamma-2
			Sfur006887	Beta-galactosidase
			Sfur006894	Probable glucosamine 6-phosphate N-acetyltransferase
			Sfur006906	Putative uncharacterized protein
			Sfur006908	Brahma-associated protein of 60 kDa
			Sfur006909	Probable RNA-directed DNA polymerase from transposon BS
			Sfur006915	UDP-glucose:glycoprotein glucosyltransferase
			Sfur006940	Alpha-tocopherol transfer protein-like
			Sfur006951	Putative fatty acyl-CoA reductase CG5065
			Sfur006953	Putative fatty acyl-CoA reductase CG8306
			Sfur006955	Putative uncharacterized protein
			Sfur006966	Protein seele
			Sfur006971	Agrin
			Sfur006981	Zinc metalloproteinase nas-15
			Sfur006992	Transmembrane emp24 domain-containing protein 2
			Sfur006994	Putative uncharacterized protein
			Sfur006996	E3 ubiquitin-protein ligase RNF170
			Sfur006998	Alpha-tocopherol transfer protein-like
			Sfur007008	Putative uncharacterized protein
			Sfur007011	Krueppel-like factor 2
			Sfur007015	Fas apoptotic inhibitory molecule 1
			Sfur007020	Alpha-tocopherol transfer protein-like
			Sfur007032	Putative uncharacterized protein
			Sfur007035	Putative uncharacterized protein
			Sfur007041	Retinol-binding protein pinta
			Sfur007050	Protein yellow
			Sfur007057	Mitogen-activated protein kinase-binding protein 1
			Sfur007058	Odorant receptor coreceptor
			Sfur007062	Glucose dehydrogenase [FAD, quinone]
			Sfur007067	Tubulointerstitial nephritis antigen-like
			Sfur007088	Adhesion G-protein coupled receptor G6
			Sfur007090	Putative uncharacterized protein
			Sfur007091	Zinc finger protein 367
			Sfur007093	Transmembrane channel-like protein 3
			Sfur007136	Glucose dehydrogenase [FAD, quinone]
			Sfur007142	Interferon-inducible double-stranded RNA-dependent protein kinase activator A homolog A
			Sfur007155	Putative uncharacterized protein
			Sfur007170	Extracellular serine/threonine protein kinase four-jointed
			Sfur007172	Probable RNA-directed DNA polymerase from transposon BS
			Sfur007189	Prenylcysteine oxidase 1
			Sfur007194	Ribonucleoprotein PTB-binding 2
			Sfur007212	Putative uncharacterized protein
			Sfur007226	Putative uncharacterized protein
			Sfur007267	Plasma kallikrein
			Sfur007273	Protein ERGIC-53
			Sfur007281	Synaptic vesicle 2-related protein
			Sfur007287	KxDL motif-containing protein CG10681
			Sfur007288	Prolow-density lipoprotein receptor-related protein 1
			Sfur007298	Putative uncharacterized protein
			Sfur007301	Putative uncharacterized protein
			Sfur007307	Putative uncharacterized protein
			Sfur007339	Putative uncharacterized protein
			Sfur007344	Serine proteinase stubble
			Sfur007351	Putative uncharacterized protein
			Sfur007376	L-threonine ammonia-lyase
			Sfur007380	Clotting factor C
			Sfur007397	Putative uncharacterized protein
			Sfur007412	Putative uncharacterized protein
			Sfur007421	Ras-responsive element-binding protein 1
			Sfur007443	Probable nuclear hormone receptor HR3
			Sfur007447	Glucose dehydrogenase [FAD, quinone]
			Sfur007449	Dihydropyrimidinase
			Sfur007457	Actin-related protein 2/3 complex subunit 4
			Sfur007459	MAM and LDL-receptor class A domain-containing protein 2 (Fragment)
			Sfur007463	Fatty acid synthase
			Sfur007465	Rhophilin-2
			Sfur007481	Glucose dehydrogenase [FAD, quinone]
			Sfur007483	Fasciclin-3
			Sfur007488	Protein seele
			Sfur007492	Cuticlin-1
			Sfur007497	Vitellogenin
			Sfur007505	Putative uncharacterized protein
			Sfur007516	Tyrosine-protein phosphatase 69D
			Sfur007517	Beta-1,4-glucuronyltransferase 1
			Sfur007520	Putative uncharacterized protein
			Sfur007534	Death-associated protein 1
			Sfur007535	Sulfate transporter
			Sfur007538	Very-long-chain 3-oxoacyl-CoA reductase
			Sfur007548	Translin
			Sfur007554	Segmentation polarity homeobox protein engrailed
			Sfur007556	Ras-related protein Rab-7L1
			Sfur007561	Ankyrin repeat, SAM and basic leucine zipper domain-containing protein 1
			Sfur007564	Putative uncharacterized protein
			Sfur007574	Putative uncharacterized protein
			Sfur007575	Contactin
			Sfur007577	Putative uncharacterized protein
			Sfur007578	Long-chain fatty acid transport protein 4
			Sfur007589	Protein BTG1
			Sfur007597	Putative uncharacterized protein
			Sfur007609	Putative uncharacterized protein
			Sfur007623	PiggyBac transposable element-derived protein 4
			Sfur007624	Kinetochore-associated protein 1
			Sfur007638	Carbohydrate sulfotransferase 11
			Sfur007641	Putative uncharacterized protein
			Sfur007652	Hexuronate transporter
			Sfur007656	Zinc metalloproteinase nas-15
			Sfur007680	Putative uncharacterized protein
			Sfur007688	Polycomb protein eed
			Sfur007701	Peroxiredoxin 1
			Sfur007704	Putative uncharacterized protein
			Sfur007714	Acetyl-CoA carboxylase
			Sfur007718	Diacylglycerol lipase-alpha
			Sfur007723	Carbohydrate sulfotransferase 11
			Sfur007726	Putative fatty acyl-CoA reductase CG5065
			Sfur007731	Lysine-specific demethylase 5A
			Sfur007736	Serine protease filzig
			Sfur007741	Calcium/calmodulin-dependent protein kinase kinase 1
			Sfur007752	U-scoloptoxin(01)-Cw1a
			Sfur007759	U-scoloptoxin(01)-Er1a
			Sfur007762	Bromodomain adjacent to zinc finger domain protein 2B
			Sfur007763	Nuclear factor interleukin-3-regulated protein
			Sfur007771	Cuticlin-4
			Sfur007782	Mitochondrial 10-formyltetrahydrofolate dehydrogenase
			Sfur007783	Putative uncharacterized protein
			Sfur007789	Transcription factor AP-2-epsilon
			Sfur007790	Putative uncharacterized protein
			Sfur007792	DnaJ homolog subfamily C member 25 homolog
			Sfur007793	Host cell factor 1
			Sfur007796	Probable RNA-directed DNA polymerase from transposon BS
			Sfur007797	Bone morphogenetic protein receptor type-2
			Sfur007802	Rhophilin-2
			Sfur007825	Rab11 family-interacting protein 1
			Sfur007830	Dolichol-phosphate mannosyltransferase subunit 1
			Sfur007842	Protein Hook homolog 1
			Sfur007844	Glucose dehydrogenase [FAD, quinone]
			Sfur007846	Protein FAM214A
			Sfur007859	Anillin
			Sfur007876	Protein bric-a-brac 1
			Sfur007883	O-acyltransferase like protein
			Sfur007895	Scavenger receptor class B member 1
			Sfur007901	Putative uncharacterized protein
			Sfur007915	Obscurin
			Sfur007922	Putative tyrosine-protein kinase Wsck
			Sfur007924	Dolichyl-diphosphooligosaccharide--protein glycosyltransferase subunit 1
			Sfur007930	Putative uncharacterized protein
			Sfur007936	Stromal membrane-associated protein 1
			Sfur007938	Probable RNA-directed DNA polymerase from transposon X-element
			Sfur007941	Serine proteinase stubble
			Sfur007942	Fumarylacetoacetase
			Sfur007956	Putative uncharacterized protein
			Sfur007959	Zinc finger MYM-type protein 1
			Sfur007960	Putative uncharacterized protein
			Sfur007970	Putative uncharacterized protein
			Sfur007990	40S ribosomal protein S18
			Sfur007998	Putative uncharacterized protein
			Sfur008021	Putative uncharacterized protein
			Sfur008028	Tubulin-specific chaperone D
			Sfur008068	Cytosolic carboxypeptidase Nna1
			Sfur008074	Nicolin-1
			Sfur008087	Phosphatidylinositol transfer protein beta isoform
			Sfur008113	Valine--tRNA ligase
			Sfur008117	Putative uncharacterized protein
			Sfur008124	Alpha-tocopherol transfer protein-like
			Sfur008139	Cytochrome P450 4g15
			Sfur008141	Inner centromere protein B
			Sfur008153	Major facilitator superfamily domain-containing protein 6
			Sfur008159	Putative uncharacterized protein
			Sfur008174	Arylsulfatase B
			Sfur008178	RNA exonuclease 1 homolog
			Sfur008184	DNA polymerase delta catalytic subunit
			Sfur008185	Putative uncharacterized protein
			Sfur008187	Glyceraldehyde-3-phosphate dehydrogenase
			Sfur008190	MKRN2 opposite strand protein
			Sfur008193	Probable signal peptidase complex subunit 2
			Sfur008200	-
			Sfur008202	Retinaldehyde-binding protein 1
			Sfur008211	Synaptic vesicle membrane protein VAT-1
			Sfur008225	A disintegrin and metalloproteinase with thrombospondin motifs 12
			Sfur008226	Dolichyldiphosphatase 1
			Sfur008236	Mannose-P-dolichol utilization defect 1 protein homolog
			Sfur008237	Alanine--tRNA ligase, cytoplasmic
			Sfur008251	Putative uncharacterized protein
			Sfur008253	Tyrosine-protein phosphatase non-receptor type 11
			Sfur008254	General odorant-binding protein 83a
			Sfur008260	Large neutral amino acids transporter small subunit 1
			Sfur008263	Cytochrome P450 4C1
			Sfur008266	Putative uncharacterized protein
			Sfur008270	Putative uncharacterized protein
			Sfur008271	Transmembrane protein 69
			Sfur008276	Putative uncharacterized protein
			Sfur008299	Putative uncharacterized protein
			Sfur008300	Coronin-7
			Sfur008312	Aurora kinase B-A
			Sfur008317	Golgin subfamily A member 2
			Sfur008329	Protein muscleblind
			Sfur008333	Chymotrypsin-1
			Sfur008337	Putative uncharacterized protein
			Sfur008342	Fatty acyl-CoA reductase wat
			Sfur008343	Putative uncharacterized protein
			Sfur008345	Methylthioribulose-1-phosphate dehydratase
			Sfur008351	Fatty acyl-CoA reductase wat
			Sfur008362	Bcl-2-related ovarian killer protein homolog A
			Sfur008374	Arylsulfatase J
			Sfur008378	Spaetzle-processing enzyme
			Sfur008404	Whirlin
			Sfur008405	D-2-hydroxyglutarate dehydrogenase, mitochondrial
			Sfur008414	Putative uncharacterized protein
			Sfur008416	Fl(2)d-associated complex component
			Sfur008425	Putative uncharacterized protein
			Sfur008428	Sodium/potassium/calcium exchanger 4
			Sfur008433	Battenin
			Sfur008436	Transcription elongation factor S-II
			Sfur008450	Endochitinase
			Sfur008451	E3 ubiquitin-protein ligase CBL-B
			Sfur008452	Endochitinase
			Sfur008454	Ankyrin repeat and BTB/POZ domain-containing protein 2
			Sfur008457	Alanine--tRNA ligase, cytoplasmic
			Sfur008465	Putative uncharacterized protein
			Sfur008486	DNA primase large subunit
			Sfur008490	Putative uncharacterized protein
			Sfur008493	Trypsin-1
			Sfur008495	Putative uncharacterized protein
			Sfur008497	Putative uncharacterized protein
			Sfur008501	Saccharopine dehydrogenase-like oxidoreductase
			Sfur008504	cAMP-dependent protein kinase catalytic subunit 1
			Sfur008509	Copia protein
			Sfur008511	Pyruvate kinase
			Sfur008514	Origin recognition complex subunit 1
			Sfur008515	Putative uncharacterized protein
			Sfur008520	RNA-binding protein Rsf1
			Sfur008522	Cilia- and flagella-associated protein 47
			Sfur008531	Coiled-coil domain-containing protein AGAP005037
			Sfur008550	Basement membrane-specific heparan sulfate proteoglycan core protein
			Sfur008554	ADP-ribosylation factor-like protein 5B
			Sfur008567	Putative uncharacterized protein
			Sfur008569	Meiotic recombination protein SPO11
			Sfur008572	Proton-coupled amino acid transporter-like protein pathetic
			Sfur008573	E3 ubiquitin-protein ligase Zswim2
			Sfur008580	Endoplasmic reticulum-Golgi intermediate compartment protein 2
			Sfur008588	EGF domain-specific O-linked N-acetylglucosamine transferase
			Sfur008590	RNA-binding protein 45
			Sfur008604	Chitin synthase chs-2
			Sfur008611	Putative uncharacterized protein
			Sfur008615	Putative uncharacterized protein
			Sfur008617	Peroxiredoxin-6
			Sfur008634	Venom carboxylesterase-6
			Sfur008637	Putative uncharacterized protein
			Sfur008638	AarF domain-containing kinase 1
			Sfur008639	Sister chromatid cohesion protein DCC1
			Sfur008657	Alpha-methylacyl-CoA racemase
			Sfur008662	Putative uncharacterized protein
			Sfur008669	Putative uncharacterized protein
			Sfur008676	Multiple inositol polyphosphate phosphatase 1
			Sfur008677	Putative uncharacterized protein
			Sfur008681	Putative uncharacterized protein
			Sfur008684	Mitochondrial amidoxime-reducing component 1
			Sfur008704	Homocysteine S-methyltransferase YbgG
			Sfur008708	Putative uncharacterized protein
			Sfur008714	Kinesin-like protein KIF18A
			Sfur008719	ALK tyrosine kinase receptor
			Sfur008723	GPI transamidase component PIG-T
			Sfur008731	Retinoic acid receptor RXR
			Sfur008761	Suppressor of cytokine signaling 5
			Sfur008762	Pro-resilin
			Sfur008764	Iodotyrosine deiodinase 1
			Sfur008771	Alpha-tocopherol transfer protein
			Sfur008772	Dual specificity tyrosine-phosphorylation-regulated kinase 2
			Sfur008774	Cytosol aminopeptidase
			Sfur008779	Chimeric ERCC6-PGBD3 protein
			Sfur008789	Putative uncharacterized protein
			Sfur008802	Nephrin
			Sfur008806	Transcriptional regulator ATRX homolog
			Sfur008831	Clavesin-1
			Sfur008843	Protein sly1 homolog
			Sfur008852	Zinc transporter zipt-7.2
			Sfur008860	Death-associated protein kinase related
			Sfur008864	Sex peptide receptor
			Sfur008871	Actin-related protein 2/3 complex subunit 5-B
			Sfur008872	Putative uncharacterized protein
			Sfur008878	Putative uncharacterized protein
			Sfur008880	Neuralized-like protein 4
			Sfur008892	Pro-resilin
			Sfur008908	Periostin
			Sfur008914	Glycerol-3-phosphate dehydrogenase, mitochondrial
			Sfur008918	Uncharacterized protein C05D11.1
			Sfur008921	Protein RCC2
			Sfur008930	Carbonyl reductase [NADPH] 1
			Sfur008932	Putative uncharacterized protein
			Sfur008948	Vitellogenic carboxypeptidase
			Sfur008961	Protein transport protein Sec61 subunit beta
			Sfur008966	Sodium/potassium/calcium exchanger 3
			Sfur008970	Tigger transposable element-derived protein 1
			Sfur008975	Dephospho-CoA kinase domain-containing protein
			Sfur008990	Xanthine dehydrogenase
			Sfur009002	Putative uncharacterized protein
			Sfur009009	Homologous-pairing protein 2 homolog
			Sfur009020	Arylsulfatase B
			Sfur009023	Thioredoxin-related transmembrane protein 1
			Sfur009028	Cytochrome P450 4g15
			Sfur009036	Serine/threonine-protein kinase PLK1
			Sfur009038	Putative uncharacterized protein
			Sfur009043	Putative fatty acyl-CoA reductase CG5065
			Sfur009051	LanC-like protein 2
			Sfur009057	3,4-dihydroxyphenylacetaldehyde synthase
			Sfur009062	Peritrophin-48
			Sfur009069	Putative uncharacterized protein
			Sfur009070	Putative uncharacterized protein
			Sfur009079	Facilitated trehalose transporter Tret1
			Sfur009080	Myosin-2 essential light chain
			Sfur009100	Arylsulfatase B
			Sfur009101	Putative uncharacterized protein
			Sfur009105	Cytosol aminopeptidase
			Sfur009114	Arylsulfatase B
			Sfur009115	Intraflagellar transport protein 140 homolog
			Sfur009119	Serine--tRNA ligase, cytoplasmic
			Sfur009121	Protein nessun dorma
			Sfur009129	Heparan sulfate 2-O-sulfotransferase 1
			Sfur009134	Putative uncharacterized protein
			Sfur009153	Dolichyl-phosphate beta-glucosyltransferase
			Sfur009159	Putative uncharacterized protein
			Sfur009168	Putative uncharacterized protein
			Sfur009180	Protein FAM136A
			Sfur009184	Probable signal peptidase complex subunit 2
			Sfur009189	Autophagy-related protein 9A
			Sfur009196	Protein O-mannosyltransferase 1
			Sfur009204	Clavesin-2
			Sfur009207	Putative uncharacterized protein
			Sfur009218	Transforming growth factor-beta-induced protein ig-h3
			Sfur009221	SET and MYND domain-containing protein 4
			Sfur009223	Armadillo repeat-containing protein 6 homolog
			Sfur009253	Protein yellow
			Sfur009255	Signal recognition particle 9 kDa protein
			Sfur009256	Proteasome subunit alpha type-7
			Sfur009259	Putative uncharacterized protein
			Sfur009269	Uncharacterized protein C7orf26
			Sfur009270	Probable G-protein coupled receptor 158
			Sfur009272	Alpha-tocopherol transfer protein-like
			Sfur009284	Chitin deacetylase 1
			Sfur009294	Putative uncharacterized protein
			Sfur009307	Actin-binding Rho-activating protein
			Sfur009374	Cyclic nucleotide-gated cation channel beta-1
			Sfur009383	Calcium channel flower
			Sfur009384	Sodium-coupled monocarboxylate transporter 2
			Sfur009385	Protein commissureless 2 homolog
			Sfur009390	Putative uncharacterized protein
			Sfur009405	Venom dipeptidyl peptidase 4
			Sfur009433	Putative uncharacterized protein
			Sfur009434	Trypsin beta
			Sfur009448	Putative uncharacterized protein
			Sfur009450	Transcriptional regulator ovo
			Sfur009455	Putative uncharacterized protein
			Sfur009479	Putative uncharacterized protein
			Sfur009482	Histone-lysine N-methyltransferase SETD2
			Sfur009485	Alpha-tocopherol transfer protein
			Sfur009486	Cell division control protein 6 homolog
			Sfur009496	Serine/threonine-protein kinase PLK4
			Sfur009497	Diacylglycerol O-acyltransferase 1
			Sfur009500	Putative uncharacterized protein
			Sfur009516	V-type proton ATPase 21 kDa proteolipid subunit
			Sfur009521	Putative uncharacterized protein
			Sfur009522	Peroxisomal carnitine O-octanoyltransferase
			Sfur009529	Aquaporin AQPcic
			Sfur009553	Breast cancer anti-estrogen resistance protein 3 homolog
			Sfur009558	GDP-fucose protein O-fucosyltransferase 2
			Sfur009562	Mediator of RNA polymerase II transcription subunit 11
			Sfur009564	Methylosome subunit pICln
			Sfur009577	SH3 and multiple ankyrin repeat domains protein 3
			Sfur009593	Putative uncharacterized protein
			Sfur009600	Nostrin
			Sfur009602	Putative uncharacterized protein
			Sfur009604	Inactive dipeptidyl peptidase 10
			Sfur009613	cAMP-dependent protein kinase catalytic subunit 3
			Sfur009619	Putative uncharacterized protein
			Sfur009643	Putative uncharacterized protein
			Sfur009654	Putative uncharacterized protein
			Sfur009661	Putative uncharacterized protein
			Sfur009662	TBC1 domain family member 19
			Sfur009664	Putative uncharacterized protein
			Sfur009680	Nostrin
			Sfur009688	Tubulin glycylase 3A
			Sfur009691	DNA polymerase delta catalytic subunit
			Sfur009697	Putative methyltransferase NSUN7
			Sfur009699	Putative uncharacterized protein
			Sfur009701	Probable citrate synthase 1, mitochondrial
			Sfur009702	Jerky protein homolog-like
			Sfur009703	Sodium-coupled monocarboxylate transporter 2
			Sfur009706	Putative uncharacterized protein
			Sfur009710	Luciferin sulfotransferase
			Sfur009733	Putative uncharacterized protein
			Sfur009737	Ubiquitin-conjugating enzyme E2 L5
			Sfur009741	mRNA cap guanine-N7 methyltransferase
			Sfur009742	Sal-like protein 1
			Sfur009744	Zinc finger E-box-binding homeobox 2
			Sfur009752	Baculoviral IAP repeat-containing protein 5
			Sfur009753	Protein escargot
			Sfur009756	Chitin deacetylase 1
			Sfur009759	Cleavage and polyadenylation specificity factor subunit 1
			Sfur009770	Putative uncharacterized protein
			Sfur009772	Putative uncharacterized protein
			Sfur009780	Spermine oxidase
			Sfur009790	Neutral alpha-glucosidase AB
			Sfur009794	Putative defense protein 1
			Sfur009795	Beta-1,3-galactosyltransferase 6
			Sfur009804	WD repeat and HMG-box DNA-binding protein 1
			Sfur009805	Chitin deacetylase 1
			Sfur009806	Putative uncharacterized protein
			Sfur009812	Limbic system-associated membrane protein
			Sfur009822	Putative uncharacterized protein
			Sfur009841	Aquaporin
			Sfur009857	Ecotropic viral integration site 5 ortholog
			Sfur009864	Alpha-tocopherol transfer protein
			Sfur009865	Probable cytochrome P450 49a1
			Sfur009868	Putative uncharacterized protein
			Sfur009876	Golgi pH regulator
			Sfur009881	Putative uncharacterized protein
			Sfur009882	Putative uncharacterized protein
			Sfur009889	Septin-2
			Sfur009965	Inositol 1,4,5-trisphosphate receptor
			Sfur009969	Lipopolysaccharide-induced tumor necrosis factor-alpha factor
			Sfur009976	Putative uncharacterized protein
			Sfur009985	ABC transporter G family member 23
			Sfur009994	Catalase
			Sfur009998	Staphylococcal nuclease domain-containing protein 1
			Sfur010000	Putative uncharacterized protein
			Sfur010021	NEDD8-activating enzyme E1 regulatory subunit
			Sfur010024	Putative uncharacterized protein
			Sfur010027	N-acetylgalactosamine kinase
			Sfur010033	Flightin
			Sfur010039	Glycosyltransferase 25 family member
			Sfur010046	Carnitine O-palmitoyltransferase 1, muscle isoform
			Sfur010052	Charged multivesicular body protein 2b
			Sfur010065	Protein furry
			Sfur010066	Proton-coupled amino acid transporter-like protein pathetic
			Sfur010070	Lipase 1
			Sfur010077	Histone chaperone asf1
			Sfur010080	NEDD8-activating enzyme E1 regulatory subunit
			Sfur010101	Small ubiquitin-related modifier 3-like
			Sfur010114	Myosin regulatory light chain sqh
			Sfur010127	Putative uncharacterized protein
			Sfur010129	Transmembrane protein 258
			Sfur010134	Juvenile hormone epoxide hydrolase 2
			Sfur010138	Mitochondrial carrier homolog 2
			Sfur010141	Transmembrane protein 208
			Sfur010146	Osmotic avoidance abnormal protein 3
			Sfur010151	Ecdysone-induced protein 78C
			Sfur010174	Putative fatty acyl-CoA reductase CG5065
			Sfur010190	Cytosolic non-specific dipeptidase
			Sfur010192	Probable cytochrome P450 49a1
			Sfur010196	Putative uncharacterized protein
			Sfur010208	Putative uncharacterized protein
			Sfur010215	ABC transporter G family member 23
			Sfur010216	Peptidyl-prolyl cis-trans isomerase-like 1
			Sfur010218	Putative uncharacterized protein
			Sfur010228	Peptidyl-prolyl cis-trans isomerase FKBP14
			Sfur010238	Putative uncharacterized protein
			Sfur010240	Serine/threonine-protein kinase WNK3
			Sfur010256	Putative serine protease K12H4.7
			Sfur010278	Abasic site processing protein HMCES
			Sfur010279	Nuclear hormone receptor FTZ-F1
			Sfur010284	Alpha-tocopherol transfer protein-like
			Sfur010285	DNA polymerase epsilon subunit 3
			Sfur010288	Putative uncharacterized protein
			Sfur010293	General transcription factor IIF subunit 1
			Sfur010307	Putative uncharacterized protein
			Sfur010310	Tyrosine 3-monooxygenase
			Sfur010314	Amino acid transporter AVT3C
			Sfur010316	cAMP-specific 3',5'-cyclic phosphodiesterase 7B
			Sfur010320	UDP-glycosyltransferase UGT5
			Sfur010342	Proton-coupled amino acid transporter-like protein pathetic
			Sfur010346	Otoferlin
			Sfur010352	Putative uncharacterized protein
			Sfur010354	GILT-like protein 1
			Sfur010362	Alpha-aminoadipic semialdehyde synthase, mitochondrial
			Sfur010398	Alpha-N-acetylglucosaminidase
			Sfur010406	Serpin B13
			Sfur010427	Lipase 1
			Sfur010434	Solute carrier family 2, facilitated glucose transporter member 1
			Sfur010439	Protein Shroom2
			Sfur010444	Putative serine protease K12H4.7
			Sfur010451	N-acetylgalactosamine kinase
			Sfur010453	Dynein beta chain, ciliary
			Sfur010462	Laminin subunit gamma-1
			Sfur010474	Apolipophorins
			Sfur010484	Putative serine protease F56F10.1
			Sfur010485	Putative uncharacterized protein
			Sfur010500	Zinc finger protein GLIS3
			Sfur010501	ADP,ATP carrier protein
			Sfur010509	Hepatic leukemia factor
			Sfur010510	Putative uncharacterized protein
			Sfur010518	Putative uncharacterized protein
			Sfur010521	ATP-binding cassette sub-family D member
			Sfur010527	Dynein regulatory complex subunit 4
			Sfur010531	Rac guanine nucleotide exchange factor JJ
			Sfur010532	Pickpocket protein 28
			Sfur010534	Actin-related protein 6
			Sfur010542	Ras-related and estrogen-regulated growth inhibitor
			Sfur010544	Zwei Ig domain protein zig-4
			Sfur010548	ABC transporter G family member 23
			Sfur010553	Putative uncharacterized protein
			Sfur010563	Mediator of RNA polymerase II transcription subunit 6
			Sfur010569	Nuclear hormone receptor FTZ-F1
[truncated: 721 more rows]

## Sheet: PE-vs-AE cis and trans
PE-vs-AE cis target gene			PE-vs-AE trans target gene
id	Description		id	Description
Sfur000996	Putative uncharacterized protein		MSTRG.10094	-
			MSTRG.10194	gustatory receptor for sugar taste 43a-like [Nilaparvata lugens]
			MSTRG.10266	hypothetical protein LSTR_LSTR011731 [Laodelphax striatellus]
			MSTRG.10374	zinc finger protein 2 homolog [Nilaparvata lugens]
			MSTRG.10527	hypothetical protein LSTR_LSTR014121 [Laodelphax striatellus]
	PE-vs-AE cis and trans gene		MSTRG.10534	katanin p80 WD40 repeat-containing subunit B1-like [Nilaparvata lugens]
id	Description		MSTRG.10535	katanin p80 WD40 repeat-containing subunit B1-like [Nilaparvata lugens]
MSTRG.10939	Phosphonates-binding periplasmic protein [Papilio xuthus]		MSTRG.10536	guanine nucleotide-binding protein subunit beta-like protein [Nilaparvata lugens]
MSTRG.11202	hypothetical protein LSTR_LSTR012958 [Laodelphax striatellus]		MSTRG.10543	dentin sialophosphoprotein-like [Nilaparvata lugens]
MSTRG.11948	hypothetical protein LSTR_LSTR012773 [Laodelphax striatellus]		MSTRG.10548	tetratricopeptide repeat protein 21B-like [Nilaparvata lugens]
MSTRG.11949	hypothetical protein LSTR_LSTR012773 [Laodelphax striatellus]		MSTRG.10603	CKLF-like MARVEL transmembrane domain-containing protein 8 [Nilaparvata lugens]
MSTRG.12188	hormone-sensitive lipase isoform X1 [Nilaparvata lugens]		MSTRG.10604	dynamin-1-like protein [Nilaparvata lugens]
MSTRG.12189	hormone-sensitive lipase isoform X1 [Nilaparvata lugens]		MSTRG.10770	cuticle protein 19-like, partial [Nilaparvata lugens]
MSTRG.12403	odorant-binding protein 3 [Sogatella furcifera]		MSTRG.10771	cuticle protein 19-like, partial [Nilaparvata lugens]
MSTRG.12404	odorant-binding protein 3 [Sogatella furcifera]		MSTRG.10791	microtubule-associated protein futsch-like isoform X2 [Odontomachus brunneus]
MSTRG.13226	titin-like [Leptinotarsa decemlineata]		MSTRG.10792	hypothetical protein LSTR_LSTR006021 [Laodelphax striatellus]
MSTRG.13228	uncharacterized protein LOC111054247 [Nilaparvata lugens]		MSTRG.10810	adhesive plaque matrix protein-like [Nilaparvata lugens]
MSTRG.13229	loricrin-like [Nilaparvata lugens]		MSTRG.10902	interference hedgehog-like [Nilaparvata lugens]
MSTRG.13233	loricrin-like [Nilaparvata lugens]		MSTRG.10909	hypothetical protein LSTR_LSTR006052 [Laodelphax striatellus]
MSTRG.13239	titin-like [Leptinotarsa decemlineata]		MSTRG.11348	hypothetical protein LSTR_LSTR003103 [Laodelphax striatellus]
MSTRG.13399	-		MSTRG.11359	hypothetical protein LSTR_LSTR003103 [Laodelphax striatellus]
MSTRG.13400	-		MSTRG.11365	hypothetical protein LSTR_LSTR003104 [Laodelphax striatellus]
MSTRG.14617	ran-specific GTPase-activating protein-like [Nilaparvata lugens]		MSTRG.11376	LOW QUALITY PROTEIN: decaprenyl-diphosphate synthase subunit 2 [Nilaparvata lugens]
MSTRG.14636	ribonuclease H2 subunit B [Nilaparvata lugens]		MSTRG.11501	insulin-like growth factor 1 receptor [Nilaparvata lugens]
MSTRG.14666	dolichyl-diphosphooligosaccharide--protein glycosyltransferase subunit STT3A-like [Nilaparvata lugens]		MSTRG.11683	-
MSTRG.14977	-		MSTRG.11711	symplekin [Cryptotermes secundus]
MSTRG.15395	reticulophagy regulator 3-like [Cryptotermes secundus]		MSTRG.11734	mucin-5AC-like [Frankliniella occidentalis]
MSTRG.16085	microtubule-associated protein RP/EB family member 3 isoform X2 [Nilaparvata lugens]		MSTRG.1174	G kinase-anchoring protein 1-like [Nilaparvata lugens]
MSTRG.19035	rho GTPase-activating protein 39 [Petromyzon marinus]		MSTRG.11760	cytochrome P450 CYP439A3 [Sogatella furcifera]
MSTRG.19037	-		MSTRG.11919	cuticle protein 19 [Nilaparvata lugens]
MSTRG.19039	-		MSTRG.11920	cuticle protein 19 [Nilaparvata lugens]
MSTRG.19233	neuropeptide-like protein 31 [Nilaparvata lugens]		MSTRG.11946	membrane-associated guanylate kinase, WW and PDZ domain-containing protein 3-like [Aphis gossypii]
MSTRG.20056	keratin, type I cytoskeletal 9-like isoform X3 [Nilaparvata lugens]		MSTRG.11950	sodium channel protein Nach-like [Nilaparvata lugens]
MSTRG.20504	-		MSTRG.11960	hypothetical protein LSTR_LSTR012765 [Laodelphax striatellus]
MSTRG.20533	monocarboxylate transporter 12 [Cephus cinctus]		MSTRG.12042	cuticle protein 7-like [Nilaparvata lugens]
MSTRG.21035	hypothetical protein B7P43_G14705 [Cryptotermes secundus]		MSTRG.12043	cuticle protein 7-like [Nilaparvata lugens]
MSTRG.2385	tubulin polyglutamylase TTLL4-like [Nilaparvata lugens]		MSTRG.12125	proteasome subunit beta type-5 [Nilaparvata lugens]
MSTRG.24156	pantothenate kinase 3-like isoform X2 [Nilaparvata lugens]		MSTRG.12131	unkown protein [Riptortus pedestris]
MSTRG.24157	pantothenate kinase 3-like isoform X2 [Nilaparvata lugens]		MSTRG.12161	hypothetical protein LSTR_LSTR006933 [Laodelphax striatellus]
MSTRG.24261	tubulin [Laodelphax striatellus]		MSTRG.12312	trichohyalin-like, partial [Nilaparvata lugens]
MSTRG.24264	BCL2/adenovirus E1B 19 kDa protein-interacting protein 3 [Nilaparvata lugens]		MSTRG.12401	odorant binding protein 2 [Sogatella furcifera]
MSTRG.25434	GATA zinc finger domain-containing protein 14-like, partial [Nilaparvata lugens]		MSTRG.12434	hypothetical protein LSTR_LSTR007778 [Laodelphax striatellus]
MSTRG.26786	venom protease-like [Nilaparvata lugens]		MSTRG.12472	pollen-specific leucine-rich repeat extensin-like protein 1 [Rhopalosiphum maidis]
MSTRG.27247	flap endonuclease 1 [Nilaparvata lugens]		MSTRG.12496	fibroin heavy chain-like isoform X1 [Leptinotarsa decemlineata]
MSTRG.27269	hypothetical protein LSTR_LSTR011202 [Laodelphax striatellus]		MSTRG.12501	pollen-specific leucine-rich repeat extensin-like protein 2 [Nilaparvata lugens]
MSTRG.29743	low choriolytic enzyme [Nilaparvata lugens]		MSTRG.12502	pollen-specific leucine-rich repeat extensin-like protein 2 [Nilaparvata lugens]
MSTRG.31762	-		MSTRG.12731	ETS homologous factor-like isoform X2 [Nilaparvata lugens]
MSTRG.32059	histidine-rich glycoprotein-like [Nilaparvata lugens]		MSTRG.12782	nose resistant to fluoxetine protein 6-like [Nilaparvata lugens]
MSTRG.32168	PREDICTED: SEC14 domain and spectrin repeat-containing protein 1-B [Bemisia tabaci]		MSTRG.1283	ATP-binding cassette sub-family G member 4-like protein [Sogatella furcifera]
MSTRG.32264	proton-coupled amino acid transporter-like protein CG1139 [Nilaparvata lugens]		MSTRG.12849	otopetrin-2-like [Nilaparvata lugens]
MSTRG.32271	proton-coupled amino acid transporter-like protein CG1139 [Nilaparvata lugens]		MSTRG.12928	hypothetical protein LSTR_LSTR003169 [Laodelphax striatellus]
MSTRG.32769	cuticle protein 8 [Nilaparvata lugens]		MSTRG.12929	tetraspanin-11-like [Nilaparvata lugens]
MSTRG.32773	cuticle protein 7-like [Nilaparvata lugens]		MSTRG.1295	caskin-1 isoform X4 [Nilaparvata lugens]
MSTRG.33278	cuticular protein [Nilaparvata lugens]		MSTRG.13082	uracil phosphoribosyltransferase homolog [Nilaparvata lugens]
MSTRG.33770	cuticular protein [Nilaparvata lugens]		MSTRG.13171	gamma-glutamylcyclotransferase-like [Nilaparvata lugens]
MSTRG.33856	N-glycosylase/DNA lyase isoform X2 [Zootermopsis nevadensis]		MSTRG.13192	aldose 1-epimerase-like [Nilaparvata lugens]
MSTRG.34955	hypothetical protein LSTR_LSTR012707 [Laodelphax striatellus]		MSTRG.13237	loricrin-like [Nilaparvata lugens]
MSTRG.35242	-		MSTRG.13270	-
MSTRG.39804	neuroblastoma-amplified sequence-like [Nilaparvata lugens]		MSTRG.13331	proteasome subunit alpha type-1 [Nilaparvata lugens]
MSTRG.39806	paired amphipathic helix protein Sin3a-like isoform X2 [Actinia tenebrosa]		MSTRG.13338	thymidylate synthase [Nilaparvata lugens]
MSTRG.529	MULE domain-containing protein [Aphis craccivora]		MSTRG.13341	ethanolamine kinase 1-like [Nilaparvata lugens]
MSTRG.5525	PREDICTED: zinc finger protein 197-like isoform X2 [Bemisia tabaci]		MSTRG.13342	ethanolamine kinase 1-like [Nilaparvata lugens]
Sfur000115	Putative uncharacterized protein		MSTRG.13390	loricrin-like [Nilaparvata lugens]
Sfur000424	Cystinosin homolog		MSTRG.13398	fibroin heavy chain isoform X2 [Aedes albopictus]
Sfur000550	Probable cytochrome P450 CYP44		MSTRG.1341	cyclic AMP-dependent transcription factor ATF-6 alpha isoform X2 [Nilaparvata lugens]
Sfur000572	Protein disulfide-isomerase A5		MSTRG.13417	retinol dehydrogenase 11 [Nilaparvata lugens]
Sfur000597	Lactosylceramide 4-alpha-galactosyltransferase		MSTRG.13565	nose resistant to fluoxetine protein 6-like isoform X1 [Nilaparvata lugens]
Sfur000838	Sodium-independent sulfate anion transporter		MSTRG.13643	nose resistant to fluoxetine protein 6-like [Nilaparvata lugens]
Sfur000881	Lipase 1		MSTRG.13644	nose resistant to fluoxetine protein 6-like [Nilaparvata lugens]
Sfur001302	Putative uncharacterized protein		MSTRG.13655	-
Sfur001308	Nose resistant to fluoxetine protein 6		MSTRG.13724	follicle cell protein 3C [Nilaparvata lugens]
Sfur001481	O-acyltransferase like protein		MSTRG.13855	hypothetical protein LSTR_LSTR007972 [Laodelphax striatellus]
Sfur001626	Putative uncharacterized protein		MSTRG.14007	GATA zinc finger domain-containing protein 14-like [Nilaparvata lugens]
Sfur002079	Neurabin-1		MSTRG.14199	fatty acid elongase [Nilaparvata lugens]
Sfur002105	Phospholipase A1 2		MSTRG.14238	uncharacterized protein LOC111044506 [Nilaparvata lugens]
Sfur002163	Protein borderless		MSTRG.14288	uncharacterized protein LOC111050574 [Nilaparvata lugens]
Sfur002387	Putative inorganic phosphate cotransporter		MSTRG.1449	uncharacterized SDCCAG3 family protein-like [Nilaparvata lugens]
Sfur002423	Cytochrome P450 4V2		MSTRG.14537	fatty acid elongase [Nilaparvata lugens]
Sfur002558	Protein disulfide-isomerase		MSTRG.14565	circadian clock-controlled protein-like, partial [Nilaparvata lugens]
Sfur002689	Lipase member H		MSTRG.14567	hypothetical protein LSTR_LSTR005957 [Laodelphax striatellus]
Sfur003019	Lipase member H-B		MSTRG.14605	adenosine deaminase-like isoform X2 [Nilaparvata lugens]
Sfur003111	Histone PARylation factor 1		MSTRG.14614	cuticular protein [Nilaparvata lugens]
Sfur003398	Corrinoid adenosyltransferase		MSTRG.14615	cuticular protein [Nilaparvata lugens]
Sfur003483	Nuclear receptor-binding protein homolog		MSTRG.14656	cuticular protein [Nilaparvata lugens]
Sfur003633	Cytochrome P450 6k1		MSTRG.14692	stromelysin-2-like [Nilaparvata lugens]
Sfur003978	Pseudouridine-5'-phosphatase		MSTRG.14696	targeting protein for Xklp2 homolog [Nilaparvata lugens]
Sfur004160	BPTI/Kunitz domain-containing protein (Fragment)		MSTRG.14795	paternally-expressed gene 3 protein-like [Nilaparvata lugens]
Sfur004695	Putative uncharacterized protein		MSTRG.14807	SWEET sugar transporter [Nilaparvata lugens]
Sfur004877	Putative uncharacterized protein		MSTRG.14814	solute carrier family 2, facilitated glucose transporter member 1-like [Nilaparvata lugens]
Sfur005031	Dolichyl-diphosphooligosaccharide--protein glycosyltransferase subunit DAD1		MSTRG.14815	solute carrier family 2, facilitated glucose transporter member 1-like [Nilaparvata lugens]
Sfur005126	Venom serine carboxypeptidase		MSTRG.14965	RISC-loading complex subunit tarbp2-like isoform X2 [Nilaparvata lugens]
Sfur005164	Putative uncharacterized protein		MSTRG.14976	-
Sfur005168	Putative uncharacterized protein		MSTRG.14985	-
Sfur005185	Glycogenin-1		MSTRG.15047	dorsal-ventral patterning protein Sog [Nilaparvata lugens]
Sfur005266	Ejaculatory bulb-specific protein 3		MSTRG.15048	hypothetical protein LSTR_LSTR007131 [Laodelphax striatellus]
Sfur005310	Mitochondrial uncoupling protein 2		MSTRG.15050	dorsal-ventral patterning protein Sog [Nilaparvata lugens]
Sfur005554	Carboxypeptidase B		MSTRG.15131	BMP and activin membrane-bound inhibitor homolog [Cimex lectularius]
Sfur005767	3-ketoacyl-CoA thiolase, mitochondrial		MSTRG.15195	-
Sfur005902	Putative uncharacterized protein		MSTRG.15344	stress protein DDR48-like [Nilaparvata lugens]
Sfur005969	26S proteasome regulatory subunit 6B		MSTRG.1537	symplekin [Nilaparvata lugens]
Sfur005980	Putative uncharacterized protein		MSTRG.15402	mucin-7-like [Nilaparvata lugens]
Sfur006024	Bromo adjacent homology domain-containing 1 protein		MSTRG.15552	hypothetical protein LSTR_LSTR012756 [Laodelphax striatellus]
Sfur006059	Vesicular glutamate transporter 1		MSTRG.15630	uncharacterized protein LOC111056397 [Nilaparvata lugens]
Sfur006327	Putative uncharacterized protein		MSTRG.15727	3-ketoacyl-CoA thiolase, mitochondrial [Nilaparvata lugens]
Sfur006396	Putative uncharacterized protein		MSTRG.15848	-
Sfur006678	Putative uncharacterized protein		MSTRG.15952	defensin [Sogatella furcifera]
Sfur006752	Putative uncharacterized protein		MSTRG.1598	fatty acid elongase [Nilaparvata lugens]
Sfur006776	Histone-lysine N-methyltransferase ASH1L		MSTRG.16039	leucine-rich repeat-containing protein 34-like [Nilaparvata lugens]
Sfur006937	Ribokinase		MSTRG.16091	protein virilizer homolog [Nilaparvata lugens]
Sfur006946	Putative uncharacterized protein		MSTRG.16092	protein virilizer homolog [Nilaparvata lugens]
Sfur007299	Protein takeout		MSTRG.16101	PREDICTED: muscle M-line assembly protein unc-89 isoform X1 [Bemisia tabaci]
Sfur007675	Alpha-1A adrenergic receptor		MSTRG.16106	snRNA-activating protein complex subunit 4 [Zootermopsis nevadensis]
Sfur007838	Putative uncharacterized protein		MSTRG.16162	latent-transforming growth factor beta-binding protein 2-like isoform X2 [Nilaparvata lugens]
Sfur008091	RB1-inducible coiled-coil protein 1		MSTRG.16579	uncharacterized protein LOC111054331 [Nilaparvata lugens]
Sfur008223	Serine/threonine-protein kinase VRK1		MSTRG.16989	zinc finger SWIM domain-containing protein 1-like [Nilaparvata lugens]
Sfur008477	Alpha-tocopherol transfer protein-like		MSTRG.17006	phospholipid phosphatase 1-like [Nilaparvata lugens]
Sfur008488	BPTI/Kunitz domain-containing protein (Fragment)		MSTRG.17552	CD109 antigen [Nilaparvata lugens]
Sfur008802	Nephrin		MSTRG.17562	hypothetical protein LSTR_LSTR000052 [Laodelphax striatellus]
Sfur008868	Copper transport protein ATOX1		MSTRG.17621	probable salivary secreted peptide [Nilaparvata lugens]
Sfur009039	Phosphomevalonate kinase		MSTRG.17655	Glycoside hydrolase, family 35,Glycoside hydrolase superfamily,Glycoside hydrolase 35, catalytic, partial [Cinara cedri]
Sfur009111	Putative uncharacterized protein		MSTRG.17690	CD63 antigen-like [Nylanderia fulva]
Sfur009267	Putative uncharacterized protein		MSTRG.17894	hypothetical protein LSTR_LSTR013002 [Laodelphax striatellus]
Sfur009486	Cell division control protein 6 homolog		MSTRG.17895	G patch domain and ankyrin repeat-containing protein 1 homolog [Nilaparvata lugens]
Sfur009576	Protein SSXT		MSTRG.18364	cuticular protein [Nilaparvata lugens]
Sfur009694	Putative uncharacterized protein		MSTRG.1846	mucin-17, partial [Asbolus verrucosus]
Sfur009957	Uridine phosphorylase 1		MSTRG.18564	organic cation transporter protein [Nilaparvata lugens]
Sfur010010	Putative uncharacterized protein		MSTRG.18565	organic cation transporter protein [Nilaparvata lugens]
Sfur010045	UNC93-like protein		MSTRG.18567	organic cation transporter protein [Nilaparvata lugens]
Sfur010067	Probable 3',5'-cyclic phosphodiesterase pde-5		MSTRG.18568	organic cation transporter protein [Nilaparvata lugens]
Sfur010100	Bestrophin-3		MSTRG.18721	bolA-like protein 3 [Nilaparvata lugens]
Sfur010101	Small ubiquitin-related modifier 3-like		MSTRG.18723	hypothetical protein B7P43_G11194 [Cryptotermes secundus]
Sfur010172	Xenotropic and polytropic retrovirus receptor 1 homolog		MSTRG.18791	hypothetical protein LSTR_LSTR000785 [Laodelphax striatellus]
Sfur010316	cAMP-specific 3',5'-cyclic phosphodiesterase 7B		MSTRG.18937	collagen alpha-1(III) chain-like [Nilaparvata lugens]
Sfur010345	ABC transporter G family member 20		MSTRG.1901	coiled-coil domain-containing protein 77-like isoform X1 [Nilaparvata lugens]
Sfur010763	Circadian locomoter output cycles protein kaput		MSTRG.19046	luciferin 4-monooxygenase [Nilaparvata lugens]
Sfur010797	Aryl hydrocarbon receptor nuclear translocator-like protein 1		MSTRG.19083	bromodomain-containing protein 4-like [Ctenocephalides felis]
Sfur011043	Putative uncharacterized protein		MSTRG.19085	dentin sialophosphoprotein-like isoform X1 [Nilaparvata lugens]
Sfur011205	Venom serine protease Bi-VSP		MSTRG.19105	Sorbin and SH3 domain-containing protein 1 [Trachymyrmex septentrionalis]
Sfur011224	Putative uncharacterized protein		MSTRG.19129	glucose dehydrogenase [FAD, quinone]-like [Nilaparvata lugens]
Sfur011283	Delta-1-pyrroline-5-carboxylate synthase		MSTRG.19193	C-Maf-inducing protein-like [Nilaparvata lugens]
Sfur011288	Exosome complex component RRP42		MSTRG.19251	ORF 7 [Spodoptera frugiperda]
Sfur011348	Putative uncharacterized protein		MSTRG.19361	-
Sfur011355	Acidic amino acid decarboxylase GADL1 (Fragment)		MSTRG.19620	hemK methyltransferase family member 1 [Nilaparvata lugens]
Sfur011490	Nucleosomal histone kinase 1		MSTRG.19798	pleckstrin homology domain-containing family G member 5-like [Nilaparvata lugens]
Sfur011575	Insulinoma-associated protein 1		MSTRG.19881	hypothetical protein LSTR_LSTR012046 [Laodelphax striatellus]
Sfur011611	Retrovirus-related Pol polyprotein from transposon 412		MSTRG.19931	AAEL000683-PA [Aedes aegypti]
Sfur011639	Venom serine protease Bi-VSP		MSTRG.2001	phosphoesterase 41, partial [Laodelphax striatellus]
Sfur011940	Dipeptidyl peptidase 3		MSTRG.2005	UDP-glucose:glycoprotein glucosyltransferase-like, partial [Nilaparvata lugens]
Sfur012046	Translin-associated protein X		MSTRG.20053	cell wall protein IFF6 isoform X3 [Nilaparvata lugens]
Sfur012506	Apolipoprotein D		MSTRG.20057	keratin, type I cytoskeletal 9-like [Nilaparvata lugens]
Sfur012589	Putative uncharacterized protein		MSTRG.2009	UDP-glucose:glycoprotein glucosyltransferase-like, partial [Nilaparvata lugens]
Sfur012950	Putative uncharacterized protein		MSTRG.20150	-
Sfur013016	Large neutral amino acids transporter small subunit 2		MSTRG.2021	armadillo repeat-containing protein 3-like [Nilaparvata lugens]
Sfur013239	Fatty-acid amide hydrolase 2		MSTRG.2032	PREDICTED: kinesin-related protein 4 isoform X2 [Crassostrea gigas]
Sfur013517	Autophagy-related protein 16-1		MSTRG.20431	ubiquitin-like-conjugating enzyme ATG10 [Nilaparvata lugens]
Sfur013811	Putative uncharacterized protein		MSTRG.20639	myosin heavy chain-like isoform X1 [Nilaparvata lugens]
Sfur013880	Transcription factor Ken 1		MSTRG.20750	EF-hand calcium-binding domain-containing protein 2-like [Nilaparvata lugens]
Sfur013944	Putative uncharacterized protein		MSTRG.21282	-
Sfur013971	Mediator of RNA polymerase II transcription subunit 4		MSTRG.2136	hypothetical protein LSTR_LSTR012045 [Laodelphax striatellus]
Sfur014534	Monocarboxylate transporter 12		MSTRG.21520	cuticular protein [Nilaparvata lugens]
Sfur014569	Biotin--protein ligase		MSTRG.21722	myosin-VIIa isoform X1 [Nilaparvata lugens]
Sfur014800	Cuticle protein 8		MSTRG.2174	tetraspanin-18-like [Nilaparvata lugens]
Sfur014875	Putative uncharacterized protein		MSTRG.21946	NAD-dependent protein deacetylase Sir2B-like [Myzus persicae]
Sfur014923	Rab GTPase-activating protein 1		MSTRG.22152	GTP cyclohydrolase 1 feedback regulatory protein-like [Actinia tenebrosa]
Sfur015112	Putative uncharacterized protein		MSTRG.22312	zinc transporter foi-like isoform X1 [Nilaparvata lugens]
Sfur015178	Putative uncharacterized protein		MSTRG.22381	hypothetical protein GE061_20699 [Apolygus lucorum]
Sfur015212	Guanine nucleotide-releasing factor 2		MSTRG.22416	m7GpppX diphosphatase-like isoform X1 [Nilaparvata lugens]
Sfur015309	Cuticle protein 19.8		MSTRG.22523	hypothetical protein LSTR_LSTR004018 [Laodelphax striatellus]
Sfur015411	UTP--glucose-1-phosphate uridylyltransferase		MSTRG.22592	amyloid beta A4 precursor protein-binding family B member 1-interacting protein-like, partial [Nilaparvata lugens]
Sfur015452	Putative uncharacterized protein		MSTRG.22658	-
			MSTRG.2267	hypothetical protein LSTR_LSTR000051 [Laodelphax striatellus]
			MSTRG.22713	farnesol dehydrogenase-like [Nilaparvata lugens]
			MSTRG.22817	probable serine/threonine-protein kinase clkA, partial [Nilaparvata lugens]
			MSTRG.22818	probable serine/threonine-protein kinase clkA, partial [Nilaparvata lugens]
			MSTRG.22969	E3 ubiquitin-protein ligase CBL-B-like [Nilaparvata lugens]
			MSTRG.22970	proton-coupled amino acid transporter-like protein pathetic [Nilaparvata lugens]
			MSTRG.2311	protein inturned isoform X1 [Cryptotermes secundus]
			MSTRG.23148	Palmitoyltransferase ZDHHC17 [Dufourea novaeangliae]
			MSTRG.23174	AAEL014873-PA [Aedes aegypti]
			MSTRG.23182	hypothetical protein LSTR_LSTR011681 [Laodelphax striatellus]
			MSTRG.23211	glycine-rich cell wall structural protein 1.8-like [Nilaparvata lugens]
			MSTRG.23311	hypothetical protein LSTR_LSTR011799 [Laodelphax striatellus]
			MSTRG.23312	hypothetical protein LSTR_LSTR011800 [Laodelphax striatellus]
			MSTRG.23564	-
			MSTRG.23598	valine--tRNA ligase-like [Nilaparvata lugens]
			MSTRG.23716	UNC93-like protein MFSD11 [Nilaparvata lugens]
			MSTRG.23725	golgin subfamily B member 1-like [Nilaparvata lugens]
			MSTRG.23771	AGAP004888-PA-like protein [Anopheles sinensis]
			MSTRG.23828	transmembrane protein 69-like [Nilaparvata lugens]
			MSTRG.23839	LOW QUALITY PROTEIN: adenylate cyclase type 9-like [Nilaparvata lugens]
			MSTRG.23852	dedicator of cytokinesis protein 9-like, partial [Nilaparvata lugens]
			MSTRG.23892	kazal-type proteinase inhibitor [Lasius niger]
			MSTRG.23935	hypothetical protein LSTR_LSTR003929 [Laodelphax striatellus]
			MSTRG.23985	uncharacterized protein LOC111044381 isoform X1 [Nilaparvata lugens]
			MSTRG.24079	proteasome subunit alpha type-2 [Nilaparvata lugens]
			MSTRG.24092	modular serine protease-like [Nilaparvata lugens]
			MSTRG.24153	pantothenate kinase 3-like isoform X2 [Nilaparvata lugens]
			MSTRG.24161	suppressor protein SRP40-like [Nilaparvata lugens]
			MSTRG.24394	protein SERAC1 isoform X2 [Cimex lectularius]
			MSTRG.24415	modular serine protease-like isoform X1 [Nilaparvata lugens]
			MSTRG.24416	modular serine protease-like isoform X1 [Nilaparvata lugens]
			MSTRG.2443	LOW QUALITY PROTEIN: H(+)/Cl(-) exchange transporter 7-like [Nilaparvata lugens]
			MSTRG.24440	polyprotein [Mizuhopecten yessoensis]
			MSTRG.2449	LOW QUALITY PROTEIN: decaprenyl-diphosphate synthase subunit 2 [Nilaparvata lugens]
			MSTRG.24665	protein D2-like isoform X2 [Nilaparvata lugens]
			MSTRG.24865	glucose dehydrogenase [FAD, quinone]-like [Nilaparvata lugens]
			MSTRG.25015	glucose dehydrogenase [FAD, quinone]-like [Nilaparvata lugens]
			MSTRG.25232	hypothetical protein LSTR_LSTR003003 [Laodelphax striatellus]
			MSTRG.25384	uncharacterized protein LOC111053345 [Nilaparvata lugens]
			MSTRG.25433	-
			MSTRG.25527	-
			MSTRG.25617	hexokinase type 2 isoform X2 [Nilaparvata lugens]
			MSTRG.25708	hypothetical protein LSTR_LSTR007419 [Laodelphax striatellus]
			MSTRG.26008	uncharacterized protein LOC111052038 [Nilaparvata lugens]
			MSTRG.26158	protein DPCD [Nilaparvata lugens]
			MSTRG.26165	fibroblast growth factor 18 isoform X2 [Nilaparvata lugens]
			MSTRG.26166	fibroblast growth factor 18 isoform X1 [Nilaparvata lugens]
			MSTRG.2618	valine--tRNA ligase isoform X2 [Nilaparvata lugens]
			MSTRG.26472	serine protease 29-like [Nilaparvata lugens]
			MSTRG.26473	serine protease 29-like [Nilaparvata lugens]
			MSTRG.2654	lysosomal alpha-glucosidase [Sogatella furcifera]
			MSTRG.26543	hypothetical protein LSTR_LSTR001290 [Laodelphax striatellus]
			MSTRG.26620	Krueppel-like factor 14 [Aphis craccivora]
			MSTRG.2663	nucleoporin Nup43-like [Nilaparvata lugens]
			MSTRG.26655	hypothetical protein LSTR_LSTR008988 [Laodelphax striatellus]
			MSTRG.26730	uncharacterized protein LOC111046292 isoform X4 [Nilaparvata lugens]
			MSTRG.26780	venom protease-like [Nilaparvata lugens]
			MSTRG.26941	reverse ribonuclease integrase [Labeo rohita]
			MSTRG.27031	dimethyladenosine transferase 2, mitochondrial isoform X2 [Zootermopsis nevadensis]
			MSTRG.27057	reverse ribonuclease integrase [Lasius niger]
			MSTRG.27062	hypothetical protein LSTR_LSTR003651 [Laodelphax striatellus]
			MSTRG.27175	ATP-dependent RNA helicase dbp2-like [Nilaparvata lugens]
			MSTRG.2726	Superoxide dismutase [Cu-Zn] B [Melipona quadrifasciata]
			MSTRG.27383	glutathione s-transferase O1 [Sogatella furcifera]
			MSTRG.27460	methyltransferase-like protein 9 isoform X1 [Nilaparvata lugens]
			MSTRG.27637	kelch-like protein 10 [Nilaparvata lugens]
			MSTRG.27684	nucleolar protein 58, partial [Nilaparvata lugens]
			MSTRG.27685	nucleolar protein 58, partial [Nilaparvata lugens]
			MSTRG.2783	tonsoku-like protein [Nilaparvata lugens]
			MSTRG.2792	nuclear pore complex protein Nup205-like [Nilaparvata lugens]
			MSTRG.28011	ATP-dependent RNA helicase A [Nilaparvata lugens]
			MSTRG.28015	dorsal, partial [Sogatella furcifera]
			MSTRG.28022	PI-actitoxin-Axm2b-like [Nilaparvata lugens]
			MSTRG.28590	acidic leucine-rich nuclear phosphoprotein 32 family member B-like [Nilaparvata lugens]
			MSTRG.28763	phospholipase A1 1-like [Nilaparvata lugens]
			MSTRG.28765	phospholipase A1 1-like [Nilaparvata lugens]
			MSTRG.28782	pao retrotransposon peptidase [Lasius niger]
			MSTRG.28833	hypothetical protein LSTR_LSTR008711 [Laodelphax striatellus]
			MSTRG.28837	-
			MSTRG.29212	lysosomal-trafficking regulator-like [Nilaparvata lugens]
			MSTRG.29317	-
			MSTRG.29319	hypothetical protein LSTR_LSTR008711 [Laodelphax striatellus]
			MSTRG.29514	protein IFH1-like [Nilaparvata lugens]
			MSTRG.2971	alpha-tocopherol transfer protein-like [Cimex lectularius]
			MSTRG.29894	enoyl-CoA hydratase, mitochondrial-like [Nilaparvata lugens]
			MSTRG.3014	hexokinase [Sogatella furcifera]
			MSTRG.30140	hypothetical protein LSTR_LSTR011822 [Laodelphax striatellus]
			MSTRG.30142	cuticle protein [Nilaparvata lugens]
			MSTRG.30143	cuticle protein [Nilaparvata lugens]
			MSTRG.30145	cuticle protein 16.5-like [Frankliniella occidentalis]
			MSTRG.30150	prisilkin-39-like [Nilaparvata lugens]
			MSTRG.30154	-
			MSTRG.30161	hypothetical protein LSTR_LSTR007444 [Laodelphax striatellus]
			MSTRG.30273	sulfotransferase 1C4-like [Nilaparvata lugens]
			MSTRG.30284	lysosomal alpha-glucosidase [Sogatella furcifera]
			MSTRG.30416	cytochrome P450 CYP6AX3 [Sogatella furcifera]
			MSTRG.30429	hypothetical protein LSTR_LSTR007918 [Laodelphax striatellus]
			MSTRG.30458	A disintegrin and metalloproteinase with thrombospondin motifs 20-like isoform X3 [Zootermopsis nevadensis]
			MSTRG.30462	A disintegrin and metalloproteinase with thrombospondin motifs 9-like [Nilaparvata lugens]
			MSTRG.30463	A disintegrin and metalloproteinase with thrombospondin motifs 9-like [Nilaparvata lugens]
			MSTRG.30679	-
			MSTRG.30918	discoidin domain-containing receptor 2-like [Nilaparvata lugens]
			MSTRG.31051	ubiquitin carboxyl-terminal hydrolase isozyme L3 isoform X1 [Nilaparvata lugens]
			MSTRG.31097	dynamin-1-like protein [Nilaparvata lugens]
			MSTRG.31105	GILT-like protein 1 isoform X1 [Nilaparvata lugens]
			MSTRG.31160	nuclear pore complex protein Nup205 isoform X1 [Cryptotermes secundus]
			MSTRG.31317	U6 snRNA-associated Sm-like protein LSm2 [Nilaparvata lugens]
			MSTRG.31507	microtubule-associated protein futsch-like isoform x1 protein [Lasius niger]
			MSTRG.31591	calcium-binding mitochondrial carrier protein SCaMC-2-A isoform X3 [Nilaparvata lugens]
			MSTRG.31684	uncharacterized protein LOC111060776 [Nilaparvata lugens]
			MSTRG.31774	zinc finger protein 337-like isoform X2 [Nilaparvata lugens]
			MSTRG.31911	-
			MSTRG.31912	seminal fluid protein, partial [Nilaparvata lugens]
			MSTRG.31937	flap endonuclease GEN homolog 1-like [Nilaparvata lugens]
			MSTRG.32051	histidine-rich glycoprotein-like [Nilaparvata lugens]
			MSTRG.32055	hypothetical protein LSTR_LSTR001863 [Laodelphax striatellus]
			MSTRG.32121	neuronal calcium sensor 2 [Halyomorpha halys]
			MSTRG.32159	titin-like [Nilaparvata lugens]
			MSTRG.32164	titin-like [Nilaparvata lugens]
			MSTRG.32167	LOW QUALITY PROTEIN: SEC14 domain and spectrin repeat-containing protein 1 [Nilaparvata lugens]
			MSTRG.32258	ninjurin-2-like [Nilaparvata lugens]
			MSTRG.32291	negative elongation factor E, partial [Asbolus verrucosus]
			MSTRG.3233	lysosomal alpha-glucosidase [Sogatella furcifera]
			MSTRG.3238	lysosomal alpha-glucosidase [Sogatella furcifera]
			MSTRG.32397	heat shock 70 kDa protein II-like [Nilaparvata lugens]
			MSTRG.32447	ninjurin-2-like [Nilaparvata lugens]
			MSTRG.32477	rhythmically expressed gene 5 protein [Nilaparvata lugens]
			MSTRG.32515	F-actin-methionine sulfoxide oxidase Mical [Nilaparvata lugens]
			MSTRG.32636	-
			MSTRG.32695	polyprotein [Mizuhopecten yessoensis]
			MSTRG.3270	U5 small nuclear ribonucleoprotein 200 kDa helicase [Asbolus verrucosus]
			MSTRG.32775	cuticular protein [Nilaparvata lugens]
			MSTRG.32777	cuticular protein [Nilaparvata lugens]
			MSTRG.32790	cuticular protein [Nilaparvata lugens]
			MSTRG.32805	cuticle protein 7-like [Nilaparvata lugens]
			MSTRG.32806	cuticle protein 7-like [Nilaparvata lugens]
			MSTRG.32888	uncharacterized protein LOC111052800 [Nilaparvata lugens]
			MSTRG.32937	trithorax group protein osa-like [Nilaparvata lugens]
			MSTRG.33352	SET and MYND domain-containing protein 4-like [Nilaparvata lugens]
			MSTRG.33448	Integrase catalytic domain-containing protein [Aphis craccivora]
			MSTRG.33487	aquaporin AQPcic, partial [Nilaparvata lugens]
			MSTRG.33501	leucine-rich repeat transmembrane neuronal protein 2-like [Nilaparvata lugens]
			MSTRG.33575	hypothetical protein LSTR_LSTR002402 [Laodelphax striatellus]
			MSTRG.33757	dystrophin, isoforms A/C/F/G/H-like, partial [Nilaparvata lugens]
			MSTRG.33833	odorant-binding protein 7 [Sogatella furcifera]
			MSTRG.3384	claspin-like isoform X1 [Nilaparvata lugens]
			MSTRG.33844	hypothetical protein LSTR_LSTR002376 [Laodelphax striatellus]
			MSTRG.33872	AP-3 complex subunit mu-1 isoform X1 [Nilaparvata lugens]
			MSTRG.33883	seminal fluid protein [Nilaparvata lugens]
			MSTRG.34003	heat shock cognate protein 70 [Laodelphax striatellus]
			MSTRG.34004	heat shock cognate protein 70 [Laodelphax striatellus]
			MSTRG.34041	hypothetical protein LSTR_LSTR012489 [Laodelphax striatellus]
			MSTRG.34045	nose resistant to fluoxetine protein 6-like [Nilaparvata lugens]
			MSTRG.34060	lysosomal acid phosphatase-like [Nilaparvata lugens]
			MSTRG.34237	NADPH:adrenodoxin oxidoreductase, mitochondrial-like [Nilaparvata lugens]
			MSTRG.34247	hypothetical protein LSTR_LSTR013687 [Laodelphax striatellus]
			MSTRG.34473	hypothetical protein LSTR_LSTR008167 [Laodelphax striatellus]
			MSTRG.34474	hypothetical protein LSTR_LSTR008167 [Laodelphax striatellus]
			MSTRG.34530	glycine-rich cuticular protein [Nilaparvata lugens]
			MSTRG.34531	glycine-rich cuticular protein [Nilaparvata lugens]
			MSTRG.34656	hypothetical protein LSTR_LSTR012904 [Laodelphax striatellus]
			MSTRG.34675	glycosaminoglycan xylosylkinase [Nilaparvata lugens]
			MSTRG.34798	hypothetical protein LSTR_LSTR012521 [Laodelphax striatellus]
			MSTRG.34922	dual specificity protein phosphatase 22-B [Nilaparvata lugens]
			MSTRG.34961	nose resistant to fluoxetine protein 6-like [Nilaparvata lugens]
			MSTRG.34962	nose resistant to fluoxetine protein 6-like [Nilaparvata lugens]
			MSTRG.34969	nose resistant to fluoxetine protein 6-like [Cimex lectularius]
			MSTRG.35037	clavesin-1-like [Nilaparvata lugens]
			MSTRG.35042	hypothetical protein LSTR_LSTR013305 [Laodelphax striatellus]
			MSTRG.35187	hypothetical protein LSTR_LSTR013175 [Laodelphax striatellus]
			MSTRG.35286	alpha-tocopherol transfer protein-like [Nilaparvata lugens]
			MSTRG.35327	hypothetical protein LSTR_LSTR009980 [Laodelphax striatellus]
			MSTRG.35331	transcription factor MafK [Nilaparvata lugens]
			MSTRG.35386	peroxidase-like [Nilaparvata lugens]
			MSTRG.35558	hypothetical protein LSTR_LSTR003296 [Laodelphax striatellus]
			MSTRG.3557	DUF4817 domain-containing protein [Aphis craccivora]
			MSTRG.35605	aminopeptidase N isoform X1 [Nilaparvata lugens]
			MSTRG.35909	hypothetical protein LSTR_LSTR009318 [Laodelphax striatellus]
			MSTRG.35925	PREDICTED: loricrin-like [Bemisia tabaci]
			MSTRG.35966	lipase 1-like [Nilaparvata lugens]
			MSTRG.35989	C3 and PZP-like alpha-2-macroglobulin domain-containing protein 8 [Nilaparvata lugens]
			MSTRG.36146	AN1-type zinc finger protein 6 [Nilaparvata lugens]
			MSTRG.36166	alpha-tocopherol transfer protein-like isoform X2 [Nilaparvata lugens]
			MSTRG.36382	mitochondrial uncoupling protein 4 [Nilaparvata lugens]
			MSTRG.3640	protein dpy-30 homolog [Nilaparvata lugens]
			MSTRG.36487	PREDICTED: prominin-like protein isoform X2 [Bemisia tabaci]
			MSTRG.3655	condensin complex subunit 3-like [Nilaparvata lugens]
			MSTRG.3657	modular serine protease-like isoform X1 [Nilaparvata lugens]
			MSTRG.36570	structural maintenance of chromosomes protein 1A [Nilaparvata lugens]
			MSTRG.36634	indian hedgehog protein [Nilaparvata lugens]
			MSTRG.36688	uridine phosphorylase 1 isoform X2 [Sogatella furcifera]
			MSTRG.36803	transcription activator MSS11-like [Cimex lectularius]
			MSTRG.36866	easter-7 [Nilaparvata lugens]
			MSTRG.36868	easter-7 [Nilaparvata lugens]
			MSTRG.36919	hypothetical protein LSTR_LSTR013068 [Laodelphax striatellus]
			MSTRG.37153	hypothetical protein LSTR_LSTR007883 [Laodelphax striatellus]
			MSTRG.37156	uncharacterized protein LOC111050532 [Nilaparvata lugens]
			MSTRG.37195	cilia- and flagella-associated protein 58-like [Nilaparvata lugens]
			MSTRG.37219	cyclic AMP response element-binding protein A-like [Nilaparvata lugens]
			MSTRG.37220	cyclic AMP response element-binding protein A-like [Nilaparvata lugens]
			MSTRG.37221	heterogeneous nuclear ribonucleoprotein 27C [Nilaparvata lugens]
			MSTRG.37368	protein fem-1 homolog CG6966 [Nilaparvata lugens]
			MSTRG.37369	protein fem-1 homolog CG6966 [Nilaparvata lugens]
			MSTRG.37572	mucin-5AC [Camponotus floridanus]
			MSTRG.37848	optomotor-blind protein-like isoform X4 [Nilaparvata lugens]
			MSTRG.38205	AGAP004293-PA [Anopheles gambiae str. PEST] [Anopheles gambiae]
			MSTRG.3838	adhesive plaque matrix protein-like [Nilaparvata lugens]
			MSTRG.38392	glucose dehydrogenase [FAD, quinone]-like [Nilaparvata lugens]
			MSTRG.38393	glucose dehydrogenase [FAD, quinone]-like [Nilaparvata lugens]
			MSTRG.38503	glucose dehydrogenase [FAD, quinone]-like [Nilaparvata lugens]
			MSTRG.38666	transmembrane protein 134 [Nilaparvata lugens]
			MSTRG.3875	aristaless-related homeobox protein-like [Nilaparvata lugens]
			MSTRG.3881	AGAP004125-PA [Anopheles gambiae str. PEST] [Anopheles gambiae]
			MSTRG.38817	Inositol 1,4,5-trisphosphate receptor [Cryptotermes secundus]
			MSTRG.3884	glutaminyl-peptide cyclotransferase-like isoform X2 [Nilaparvata lugens]
			MSTRG.39639	Chitin binding domain [Trinorchestia longiramus]
			MSTRG.39677	hypothetical protein LSTR_LSTR005631 [Laodelphax striatellus]
			MSTRG.39828	hypothetical protein LSTR_LSTR011578 [Laodelphax striatellus]
			MSTRG.39957	protein DEK-like [Nilaparvata lugens]
			MSTRG.39994	protein takeout-like [Nilaparvata lugens]
			MSTRG.4013	protein ecdysoneless [Nilaparvata lugens]
			MSTRG.4039	blastoderm-specific protein 25D isoform X2 [Nilaparvata lugens]
			MSTRG.4151	DNA repair protein RAD50 [Nilaparvata lugens]
			MSTRG.4153	DNA repair protein RAD50 [Nilaparvata lugens]
			MSTRG.4286	protein msta-like [Nilaparvata lugens]
			MSTRG.4305	cGMP-dependent protein kinase, isozyme 2 forms cD4/T1/T3A/T3B isoform X1 [Zootermopsis nevadensis]
			MSTRG.4355	heat shock protein 70-1 [Laodelphax striatellus]
			MSTRG.4356	heat shock protein 70-1 [Laodelphax striatellus]
			MSTRG.4405	hypothetical protein LSTR_LSTR014163 [Laodelphax striatellus]
			MSTRG.4449	osiris 24-like protein [Lasius niger]
			MSTRG.4572	hypothetical protein LSTR_LSTR008314 [Laodelphax striatellus]
			MSTRG.4676	ATP-citrate synthase-like isoform X2 [Nilaparvata lugens]
			MSTRG.4684	ATP-citrate synthase-like isoform X2 [Nilaparvata lugens]
			MSTRG.4834	-
			MSTRG.4869	hypothetical protein LSTR_LSTR005539 [Laodelphax striatellus]
			MSTRG.4917	-
			MSTRG.4940	proclotting enzyme-3 [Nilaparvata lugens]
			MSTRG.4941	proclotting enzyme-3 [Nilaparvata lugens]
			MSTRG.4994	androgen-dependent TFPI-regulating protein-like [Nilaparvata lugens]
			MSTRG.5237	Transcription factor homeodomain, male germ-cell [Cinara cedri]
			MSTRG.5282	high mobility group protein I [Sipha flava]
			MSTRG.5392	microtubule-associated protein futsch-like isoform X1 [Nilaparvata lugens]
			MSTRG.5444	F-box only protein 7-like [Pieris rapae]
			MSTRG.5508	-
			MSTRG.5700	cuticular protein [Nilaparvata lugens]
			MSTRG.5712	Aldehyde dehydrogenase family 16 member A1-like Protein [Tribolium castaneum]
			MSTRG.5742	uncharacterized protein LOC114347285 isoform X3 [Diabrotica virgifera virgifera]
			MSTRG.6030	apolipoprotein D-like [Frankliniella occidentalis]
			MSTRG.613	GDP-L-fucose synthase [Nilaparvata lugens]
			MSTRG.6295	cuticle protein 8-like [Nilaparvata lugens]
			MSTRG.631	C-type lectin domain family 12 member B-like [Nilaparvata lugens]
			MSTRG.6360	protein drumstick isoform X1 [Nilaparvata lugens]
			MSTRG.7078	uncharacterized protein LOC111049714 [Nilaparvata lugens]
			MSTRG.7169	hypothetical protein LSTR_LSTR005268 [Laodelphax striatellus]
			MSTRG.7566	armadillo repeat-containing protein 3-like [Nilaparvata lugens]
			MSTRG.7636	F-box only protein 39-like [Nilaparvata lugens]
			MSTRG.7758	Orange domain [Cinara cedri]
			MSTRG.7798	GH18386 [Drosophila grimshawi]
			MSTRG.7902	Integrase catalytic domain-containing protein [Aphis craccivora]
			MSTRG.7920	UDP-glucuronosyltransferase 2B18-like [Nilaparvata lugens]
			MSTRG.803	PREDICTED: kinesin-related protein 4 isoform X1 [Crassostrea gigas]
			MSTRG.8225	hypothetical protein LSTR_LSTR008437 [Laodelphax striatellus]
			MSTRG.8273	glycosylphosphatidylinositol anchor attachment 1 protein-like [Nilaparvata lugens]
			MSTRG.833	fasciclin-3 isoform X1 [Cimex lectularius]
			MSTRG.8436	-
			MSTRG.8494	uncharacterized protein LOC111061860 [Nilaparvata lugens]
			MSTRG.8496	uncharacterized protein LOC111061860 [Nilaparvata lugens]
			MSTRG.850	alpha-tocopherol transfer protein-like [Nilaparvata lugens]
			MSTRG.8532	nucleoporin NDC1 [Nilaparvata lugens]
			MSTRG.8561	golgin subfamily A member 7-like [Nilaparvata lugens]
			MSTRG.8620	-
			MSTRG.8630	CLUMA_CG002505, isoform A [Clunio marinus]
			MSTRG.8631	CLUMA_CG002505, isoform A [Clunio marinus]
			MSTRG.8635	cuticle protein 19.8-like [Nilaparvata lugens]
			MSTRG.8636	cuticle protein 19.8-like [Nilaparvata lugens]
			MSTRG.8666	PREDICTED: polyamine-modulated factor 1-like [Neodiprion lecontei]
			MSTRG.8679	keratin, type I cytoskeletal 9-like [Nilaparvata lugens]
			MSTRG.8693	defensin [Sogatella furcifera]
			MSTRG.88	mucin-5AC-like [Ctenocephalides felis]
			MSTRG.8961	TGFb propeptide domain-containing protein [Aphis craccivora]
			MSTRG.8979	titin [Trichogramma pretiosum]
			MSTRG.8996	scavenger receptor class B member 1-like [Nilaparvata lugens]
			MSTRG.9007	-
			MSTRG.9032	LOW QUALITY PROTEIN: DNA replication licensing factor Mcm6-like [Nilaparvata lugens]
			MSTRG.9036	LOW QUALITY PROTEIN: DNA replication licensing factor Mcm6-like [Nilaparvata lugens]
			MSTRG.9056	BRCA1-associated protein [Nilaparvata lugens]
			MSTRG.9097	prostate stem cell antigen [Zootermopsis nevadensis]
			MSTRG.9131	PREDICTED: troponin C-like [Nicrophorus vespilloides]
			MSTRG.9150	probable ATP-dependent RNA helicase DDX52 [Nilaparvata lugens]
			MSTRG.9162	unkown protein [Riptortus pedestris]
			MSTRG.9294	-
			MSTRG.9296	RNA polymerase I-specific transcription initiation factor RRN3 [Nilaparvata lugens]
			MSTRG.935	Transposon Tf2-6 polyprotein [Araneus ventricosus]
			MSTRG.9378	ester hydrolase C11orf54 homolog [Nilaparvata lugens]
			MSTRG.9553	hypothetical protein LSTR_LSTR008923 [Laodelphax striatellus]
			MSTRG.9601	pollen-specific leucine-rich repeat extensin-like protein 1 [Nilaparvata lugens]
			MSTRG.9663	hypothetical protein LSTR_LSTR001460 [Laodelphax striatellus]
			MSTRG.976	TBC1 domain family member 4 isoform X2 [Cryptotermes secundus]
			MSTRG.9846	guanylate cyclase 32E-like isoform X1 [Melanaphis sacchari]
			Sfur000012	Probable small nuclear ribonucleoprotein G
			Sfur000028	N(4)-(Beta-N-acetylglucosaminyl)-L-asparaginase (Fragment)
			Sfur000032	Mediator of RNA polymerase II transcription subunit 12
			Sfur000033	Protein FAM43A
			Sfur000035	Solute carrier family 2, facilitated glucose transporter member 8
			Sfur000038	Mitotic checkpoint serine/threonine-protein kinase BUB1
			Sfur000042	Putative uncharacterized protein
			Sfur000047	Elongation of very long chain fatty acids protein AAEL008004
			Sfur000053	Protein takeout
			Sfur000059	Putative uncharacterized protein
			Sfur000067	Poly [ADP-ribose] polymerase
			Sfur000070	DNA polymerase alpha catalytic subunit
			Sfur000071	DNA replication licensing factor Mcm7
			Sfur000075	EF-hand domain-containing family member C2
			Sfur000079	Ras-related GTP-binding protein A
			Sfur000082	Protocadherin-like wing polarity protein stan
			Sfur000088	Putative uncharacterized protein
			Sfur000100	Cytochrome P450 4C1
			Sfur000103	Putative uncharacterized protein
			Sfur000109	ATP-dependent DNA helicase DDX11
			Sfur000110	Lysosomal thioesterase PPT2 homolog
			Sfur000111	Arylsulfatase B
			Sfur000112	Protein kinase C-binding protein 1
			Sfur000117	Probable multidrug resistance-associated protein lethal(2)03659
			Sfur000119	Elongation of very long chain fatty acids protein 4
			Sfur000123	Putative uncharacterized protein
			Sfur000141	Protein takeout
			Sfur000145	DNA replication licensing factor Mcm7
			Sfur000151	Protein takeout
			Sfur000156	Sterile alpha motif domain-containing protein 15
			Sfur000157	Hydroxyacid oxidase 1
			Sfur000165	Solute carrier family 35 member E1 homolog
			Sfur000166	Protein takeout
			Sfur000167	SH3 and cysteine-rich domain-containing protein 2
			Sfur000186	Protein takeout
			Sfur000188	Elongation of very long chain fatty acids protein 4
			Sfur000193	Pancreatic lipase-related protein 2
			Sfur000195	Ras GTPase-activating protein 3
			Sfur000207	Hydroxymethylglutaryl-CoA synthase, cytoplasmic
			Sfur000209	UDP-glucose:glycoprotein glucosyltransferase
			Sfur000219	Filamin-C
			Sfur000224	Neuroligin-4, Y-linked
			Sfur000236	Putative uncharacterized protein
			Sfur000238	Calcium homeostasis endoplasmic reticulum protein
			Sfur000240	Trifunctional enzyme subunit beta, mitochondrial
			Sfur000243	F-box-like/WD repeat-containing protein TBL1XR1
			Sfur000246	Protein takeout
			Sfur000262	NAD(P) transhydrogenase, mitochondrial
			Sfur000268	Elongation of very long chain fatty acids protein AAEL008004
			Sfur000269	Tubulin alpha-1 chain
			Sfur000272	Heparan-sulfate 6-O-sulfotransferase 1
			Sfur000273	Elongation of very long chain fatty acids protein AAEL008004
			Sfur000284	Putative uncharacterized protein
			Sfur000286	Cytochrome P450 4c3
			Sfur000294	EF-hand domain-containing family member C2
			Sfur000297	Choline transporter-like 1
			Sfur000301	Elongation of very long chain fatty acids protein AAEL008004
			Sfur000302	Endoplasmin
			Sfur000311	Protein takeout
			Sfur000318	Protein takeout
			Sfur000322	Solute carrier family 2, facilitated glucose transporter member 8
			Sfur000323	Cytochrome P450 4C1
			Sfur000330	Acyl-CoA Delta(11) desaturase
			Sfur000334	Collagenase 3
			Sfur000336	Sodium-dependent phosphate transporter 1-A
			Sfur000337	Elongation of very long chain fatty acids protein AAEL008004
			Sfur000338	Ichor
			Sfur000343	Alpha-1,2-mannosyltransferase ALG9
			Sfur000347	NAD(P) transhydrogenase, mitochondrial
			Sfur000349	Protein takeout
			Sfur000350	Putative uncharacterized protein
			Sfur000352	Protein takeout
			Sfur000371	Forkhead box protein N1
			Sfur000372	Cystathionine gamma-lyase
			Sfur000373	Oxidation resistance protein 1
			Sfur000382	Integrator complex subunit 4
			Sfur000387	Circadian clock-controlled protein daywake
			Sfur000392	Endoplasmin
			Sfur000393	Protein takeout
			Sfur000400	Elongation of very long chain fatty acids protein AAEL008004
			Sfur000405	Polypyrimidine tract-binding protein 1
			Sfur000419	Calreticulin
			Sfur000421	Putative uncharacterized protein
			Sfur000422	MFS-type transporter SLC18B1
			Sfur000423	Putative uncharacterized protein
			Sfur000426	Protein takeout
			Sfur000443	Probable small nuclear ribonucleoprotein Sm D2
			Sfur000444	Putative uncharacterized protein
			Sfur000445	Putative uncharacterized protein
			Sfur000450	G-patch domain and KOW motifs-containing protein
			Sfur000460	Putative uncharacterized protein
			Sfur000461	Caskin-2
			Sfur000463	Putative uncharacterized protein
			Sfur000471	Bifunctional purine biosynthesis protein ATIC
			Sfur000472	Putative uncharacterized protein
			Sfur000480	Probable aminopeptidase NPEPL1
			Sfur000483	Pyruvate kinase
			Sfur000490	Multiple inositol polyphosphate phosphatase 1
			Sfur000494	Trehalase
			Sfur000497	Transmembrane protein 186
			Sfur000511	Calexcitin-1
			Sfur000523	Putative uncharacterized protein
			Sfur000526	Phospholipase A2 OS2
			Sfur000539	Putative uncharacterized protein
			Sfur000547	Coiled-coil domain-containing protein 96
			Sfur000549	Serine-threonine kinase receptor-associated protein
			Sfur000558	Putative uncharacterized protein
			Sfur000560	Tektin-4
			Sfur000561	Eukaryotic peptide chain release factor GTP-binding subunit ERF3A
			Sfur000568	Ankyrin repeat domain-containing protein 27
			Sfur000580	N-chimaerin
			Sfur000582	Putative uncharacterized protein
			Sfur000584	Putative uncharacterized protein
			Sfur000598	Solute carrier family 46 member 3
			Sfur000601	ATP-sensitive inward rectifier potassium channel 12
			Sfur000602	Protein yellow
			Sfur000605	Putative uncharacterized protein
			Sfur000608	Plasma kallikrein
			Sfur000611	-
			Sfur000613	Transposon Tf2-11 polyprotein
			Sfur000616	Tubulin beta-4B chain
			Sfur000626	Tropomodulin
			Sfur000630	Putative uncharacterized protein
			Sfur000631	Spaetzle-processing enzyme
			Sfur000636	Putative uncharacterized protein
			Sfur000638	Sodium-independent sulfate anion transporter
			Sfur000643	Protein scarlet
			Sfur000649	Glycerol-3-phosphate dehydrogenase [NAD(+)], cytoplasmic
			Sfur000672	Serine/arginine-rich splicing factor 2
			Sfur000674	COP9 signalosome complex subunit 6
			Sfur000677	Putative uncharacterized protein
			Sfur000690	Putative uncharacterized protein
			Sfur000694	Putative uncharacterized protein
			Sfur000698	Chimeric ERCC6-PGBD3 protein
			Sfur000702	Synaptic vesicle glycoprotein 2C
			Sfur000705	Putative uncharacterized protein
			Sfur000707	Protein timeless homolog
			Sfur000719	Putative uncharacterized protein
			Sfur000721	Mediator of RNA polymerase II transcription subunit 21
			Sfur000726	UNC93-like protein MFSD11
			Sfur000728	Developmentally-regulated GTP-binding protein 2
			Sfur000729	Protein HIRA
			Sfur000733	Probable aminopeptidase NPEPL1
			Sfur000734	Putative uncharacterized protein
			Sfur000736	Centrosomal protein 20
			Sfur000741	DNA polymerase epsilon subunit 4
			Sfur000748	Putative uncharacterized protein
			Sfur000753	DNA-directed RNA polymerase III subunit RPC6
			Sfur000759	Putative uncharacterized protein
			Sfur000763	Putative uncharacterized protein
			Sfur000770	Transmembrane protein 165
			Sfur000791	Facilitated trehalose transporter Tret1
			Sfur000792	Cilia- and flagella-associated protein 52
			Sfur000799	Putative uncharacterized protein
			Sfur000803	E3 ubiquitin-protein ligase UHRF1
			Sfur000804	Myosin-9
			Sfur000805	Putative uncharacterized protein
			Sfur000807	Spaetzle-processing enzyme
			Sfur000808	5'-3' exonuclease PLD3
			Sfur000821	L-xylulose reductase
			Sfur000824	Putative uncharacterized protein
			Sfur000826	Putative uncharacterized protein
			Sfur000832	Putative uncharacterized protein
			Sfur000852	L-xylulose reductase
			Sfur000855	Protein snakeskin
			Sfur000858	Putative uncharacterized protein
			Sfur000862	60S ribosomal protein L38
			Sfur000865	Putative uncharacterized protein
			Sfur000867	Signal peptidase complex catalytic subunit SEC11A
			Sfur000869	Tetraspanin-31
			Sfur000870	4-hydroxy-2-oxoglutarate aldolase, mitochondrial
			Sfur000871	DNA topoisomerase 3-alpha
			Sfur000873	Putative uncharacterized protein
			Sfur000874	Ubiquitin carboxyl-terminal hydrolase 2
			Sfur000882	Putative uncharacterized protein
			Sfur000883	Putative uncharacterized protein
			Sfur000894	Putative uncharacterized protein
			Sfur000897	Signal recognition particle 19 kDa protein
			Sfur000898	Probable pyruvate dehydrogenase E1 component subunit alpha, mitochondrial
			Sfur000901	Putative uncharacterized protein
			Sfur000902	Myosin light chain 1
			Sfur000904	Putative uncharacterized protein
			Sfur000913	Putative uncharacterized protein
			Sfur000915	Putative uncharacterized protein
			Sfur000917	Putative uncharacterized protein
			Sfur000923	Protein yellow
			Sfur000934	Putative uncharacterized protein
			Sfur000951	Probable tRNA (guanine(26)-N(2))-dimethyltransferase
			Sfur000970	Myosin heavy chain, non-muscle
			Sfur000978	Putative uncharacterized protein
			Sfur000982	Lethal(2) giant larvae protein
			Sfur000997	PHD finger protein 14
			Sfur001000	Aquaporin
			Sfur001001	Scavenger receptor class B member 1
			Sfur001004	V-type proton ATPase 116 kDa subunit a isoform 4
			Sfur001014	Putative uncharacterized protein
			Sfur001021	Cytochrome P450 4c3
			Sfur001025	Fatty acyl-CoA reductase wat
			Sfur001026	Putative uncharacterized protein
			Sfur001030	Pyridoxal-dependent decarboxylase domain-containing protein 1
			Sfur001038	Putative uncharacterized protein
			Sfur001043	ER lumen protein-retaining receptor
			Sfur001046	Serine/arginine-rich splicing factor 2
			Sfur001063	Phosphopantothenate--cysteine ligase
			Sfur001066	Putative uncharacterized protein
			Sfur001067	Probable chitinase 10
			Sfur001086	Sodium-independent sulfate anion transporter
			Sfur001087	Protein ELYS
			Sfur001091	Spaetzle-processing enzyme
			Sfur001100	Protein ELYS
			Sfur001103	Putative uncharacterized protein
			Sfur001115	26S proteasome non-ATPase regulatory subunit 12
			Sfur001116	Dynein light chain 1, cytoplasmic
			Sfur001129	Cytokine-inducible SH2-containing protein
			Sfur001132	2-oxo-4-hydroxy-4-carboxy-5-ureidoimidazoline decarboxylase
			Sfur001135	Sodium-independent sulfate anion transporter
			Sfur001136	Putative uncharacterized protein
			Sfur001142	N-acetyltransferase ESCO2
			Sfur001144	Heterogeneous nuclear ribonucleoprotein 87F
			Sfur001151	Protein disulfide-isomerase A3
			Sfur001154	Retinol dehydrogenase 13
			Sfur001160	Putative uncharacterized protein
			Sfur001161	Agrin
			Sfur001170	Intraflagellar transport protein 27 homolog
			Sfur001173	Putative uncharacterized protein
			Sfur001192	Probable 26S proteasome non-ATPase regulatory subunit 3
			Sfur001205	Aldo-keto reductase family 1 member B1
			Sfur001206	Protein timeless homolog
			Sfur001235	Putative uncharacterized protein
			Sfur001236	Symplekin
			Sfur001243	Down syndrome cell adhesion molecule-like protein Dscam2
			Sfur001248	Putative uncharacterized protein
			Sfur001250	Calumenin-B
			Sfur001254	Probable cytochrome P450 301a1, mitochondrial
			Sfur001256	Nose resistant to fluoxetine protein 6
			Sfur001261	Ets DNA-binding protein pokkuri
			Sfur001276	RNA-binding protein squid
			Sfur001284	Glutaredoxin domain-containing cysteine-rich protein CG31559
			Sfur001288	DNA-directed RNA polymerase II subunit Rpb4
			Sfur001295	Torso-like protein
			Sfur001296	NudC domain-containing protein 2
			Sfur001305	Protein goliath
			Sfur001309	Venom carboxylesterase-6
			Sfur001311	Glutaredoxin domain-containing cysteine-rich protein CG31559
			Sfur001312	Hsc70-interacting protein
			Sfur001313	Protein inscuteable homolog
			Sfur001320	Centrosomal protein of 135 kDa
			Sfur001323	Transcription factor SOX-6
			Sfur001333	Retinol dehydrogenase 14
			Sfur001337	Putative uncharacterized protein
			Sfur001356	Nose resistant to fluoxetine protein 6
			Sfur001357	Tryptophan 2,3-dioxygenase
			Sfur001358	Head-specific guanylate cyclase
			Sfur001362	Putative uncharacterized protein
			Sfur001369	Phospholipase A-2-activating protein
			Sfur001371	Myosin light chain kinase, smooth muscle
			Sfur001372	Nose resistant to fluoxetine protein 6
			Sfur001378	Putative uncharacterized protein
			Sfur001382	Putative uncharacterized protein
			Sfur001384	Putative uncharacterized protein
			Sfur001388	Putative uncharacterized protein
			Sfur001393	Putative uncharacterized protein
			Sfur001398	Regulator of telomere elongation helicase 1 homolog
			Sfur001403	Nose resistant to fluoxetine protein 6
			Sfur001410	Venom carboxylesterase-6
			Sfur001415	Patatin-like phospholipase domain-containing protein 2
			Sfur001416	Putative uncharacterized protein
			Sfur001417	Leucine--tRNA ligase, cytoplasmic
			Sfur001418	Elongation of very long chain fatty acids protein AAEL008004
			Sfur001421	Translocon-associated protein subunit gamma
			Sfur001428	Vascular endothelial growth factor A
			Sfur001430	Rab proteins geranylgeranyltransferase component A 2
			Sfur001438	Splicing factor 3A subunit 2
			Sfur001442	Venom carboxylesterase-6
			Sfur001462	Ets DNA-binding protein pokkuri
			Sfur001468	Elongation of very long chain fatty acids protein 4
			Sfur001473	Proteasome maturation protein
			Sfur001474	Anaphase-promoting complex subunit 4
			Sfur001478	REPTOR-binding partner
			Sfur001479	DNA topoisomerase 3-beta
			Sfur001483	Putative uncharacterized protein
			Sfur001487	Alpha-N-acetylgalactosaminidase
			Sfur001496	AN1-type zinc finger protein 2B
			Sfur001497	D-aminoacyl-tRNA deacylase
			Sfur001506	Cleavage and polyadenylation specificity factor subunit 6
			Sfur001513	Probable asparagine--tRNA ligase, mitochondrial
			Sfur001515	Apoptosis inhibitor 5
			Sfur001520	Endochitinase
			Sfur001521	T-complex protein 1 subunit beta
			Sfur001522	Muscle-specific protein 20
			Sfur001531	Coatomer subunit beta
			Sfur001536	THO complex subunit 2
			Sfur001541	Neurobeachin
			Sfur001545	Protein mini spindles
			Sfur001547	Lysoplasmalogenase-like protein TMEM86A
			Sfur001550	Putative uncharacterized protein
			Sfur001562	Serine protease hepsin
			Sfur001563	Growth arrest-specific protein 2
			Sfur001573	O-acyltransferase like protein
			Sfur001588	Neurobeachin
			Sfur001590	Lipase 1
			Sfur001591	Sodium/hydrogen exchanger 10
			Sfur001592	Putative uncharacterized protein
			Sfur001614	Probable cytochrome P450 49a1
			Sfur001616	Putative uncharacterized protein
			Sfur001617	Venom carboxylesterase-6
			Sfur001629	LIRP
			Sfur001630	Putative uncharacterized protein
			Sfur001638	Clavesin-2
			Sfur001643	Alpha-N-acetylgalactosaminidase
			Sfur001650	Glucosamine-6-phosphate isomerase
			Sfur001656	Soma ferritin
			Sfur001670	Chitooligosaccharidolytic beta-N-acetylglucosaminidase
			Sfur001672	Lutropin-choriogonadotropic hormone receptor
			Sfur001673	Putative uncharacterized protein
			Sfur001674	Single-stranded DNA-binding protein, mitochondrial
			Sfur001677	Putative uncharacterized protein
			Sfur001678	Krueppel homolog 2
			Sfur001681	Signal peptidase complex subunit 3
			Sfur001686	Protein krueppel
			Sfur001691	Peroxisomal membrane protein PEX16
			Sfur001692	O-acyltransferase like protein
			Sfur001698	Putative uncharacterized protein
			Sfur001727	Poly(U)-specific endoribonuclease homolog
			Sfur001743	Probable 3',5'-cyclic phosphodiesterase pde-5
			Sfur001745	Protein takeout
			Sfur001770	Centrosomal protein of 131 kDa
			Sfur001774	Putative uncharacterized protein
			Sfur001783	Serine proteinase stubble
			Sfur001786	Fibroblast growth factor receptor homolog 2
			Sfur001789	Putative uncharacterized protein
			Sfur001806	Monocarboxylate transporter 10
			Sfur001817	Putative uncharacterized protein
			Sfur001825	Condensin complex subunit 3
			Sfur001830	E3 ubiquitin-protein ligase lubel
			Sfur001859	Protein FAM98A
			Sfur001861	Facilitated trehalose transporter Tret1
			Sfur001869	Actin-5C
			Sfur001890	Pancreatic triacylglycerol lipase
			Sfur001899	Cysteine sulfinic acid decarboxylase
			Sfur001901	Probable ATP-dependent RNA helicase DDX60
			Sfur001906	Brefeldin A-inhibited guanine nucleotide-exchange protein 1
			Sfur001911	Brevican core protein
			Sfur001915	ATP-binding cassette sub-family G member 4
			Sfur001919	Transcription factor Sox-9-A
			Sfur001924	Putative uncharacterized protein
			Sfur001926	Myosin-I heavy chain
			Sfur001927	EKC/KEOPS complex subunit bud32
			Sfur001931	N-acetylgalactosaminyltransferase 7
			Sfur001932	Cyclin-dependent kinase 14
			Sfur001933	Protein virilizer
			Sfur001941	Gamma-aminobutyric acid type B receptor subunit 1
			Sfur001961	Potassium channel KOR1
			Sfur001968	Putative uncharacterized protein
			Sfur001969	Glutamate receptor ionotropic, kainate 2
			Sfur001979	-
			Sfur001985	Frizzled-2
			Sfur001986	Aldose reductase-related protein 2
			Sfur001987	Retrovirus-related Pol polyprotein from transposon TNT 1-94
			Sfur001994	Fatty acyl-CoA reductase 1
			Sfur001996	Putative uncharacterized protein
			Sfur001997	Putative inorganic phosphate cotransporter
			Sfur001998	Mitochondrial thiamine pyrophosphate carrier
			Sfur002002	Putative uncharacterized protein
			Sfur002024	Diamine acetyltransferase 1
			Sfur002041	Glucose-6-phosphate isomerase
			Sfur002064	Methanethiol oxidase
			Sfur002072	Palmitoyl-protein thioesterase 1
			Sfur002073	Diphosphoinositol polyphosphate phosphohydrolase 1
			Sfur002078	Juvenile hormone acid O-methyltransferase
			Sfur002082	Luciferin sulfotransferase
			Sfur002093	Alanine--glyoxylate aminotransferase 2, mitochondrial
			Sfur002106	Putative uncharacterized protein
			Sfur002132	Translocon-associated protein subunit alpha
			Sfur002136	PiggyBac transposable element-derived protein 4
			Sfur002145	Phenoloxidase-activating factor 2
			Sfur002165	ATP-binding cassette sub-family G member 4
			Sfur002167	DNA topoisomerase 2
			Sfur002175	Heparan sulfate 2-O-sulfotransferase pipe
			Sfur002179	Putative uncharacterized protein
			Sfur002180	Alanine aminotransferase 1
			Sfur002182	Putative uncharacterized protein
			Sfur002188	Putative phospholipase B-like 2
			Sfur002192	Putative uncharacterized protein
			Sfur002196	Putative uncharacterized protein
			Sfur002197	ATP-binding cassette sub-family G member 1
			Sfur002201	Putative uncharacterized protein
			Sfur002202	Tyrosine-protein kinase Src64B
			Sfur002203	UBX domain-containing protein 1-B
			Sfur002221	Putative uncharacterized protein
			Sfur002233	Hexokinase
			Sfur002235	Leukocyte receptor cluster member 8
			Sfur002272	Tubulin alpha-1 chain
			Sfur002275	Putative uncharacterized protein
			Sfur002283	Kinesin-like protein CG14535
			Sfur002293	Myelin expression factor 2
			Sfur002300	Zinc metalloproteinase nas-14
			Sfur002315	DNA replication licensing factor MCM4
			Sfur002318	Intraflagellar transport protein 172 homolog
			Sfur002323	Serine/threonine-protein kinase MAK
			Sfur002336	Cadherin-related tumor suppressor
			Sfur002353	rRNA-processing protein FCF1 homolog
			Sfur002358	Sodium-coupled monocarboxylate transporter 2
			Sfur002371	GTP-binding protein GEM
			Sfur002373	Putative uncharacterized protein
			Sfur002376	Gamma-aminobutyric acid type B receptor subunit 1
			Sfur002386	Peptidyl-prolyl cis-trans isomerase E
			Sfur002398	Zinc finger homeobox protein 3
			Sfur002402	Putative uncharacterized protein
			Sfur002404	Putative uncharacterized protein
			Sfur002407	Transmembrane protein 87B
			Sfur002413	Tektin-B1
			Sfur002437	Cyclin-dependent kinase 9
			Sfur002443	E3 ubiquitin-protein ligase znrf2
			Sfur002456	Coiled-coil domain-containing protein 85C-B
			Sfur002482	Putative uncharacterized protein
			Sfur002488	Elongation of very long chain fatty acids protein 7
			Sfur002528	Fatty acid synthase
			Sfur002533	Putative uncharacterized protein
			Sfur002538	Putative uncharacterized protein
			Sfur002544	Proteasome subunit beta type-7
			Sfur002545	Putative uncharacterized protein
			Sfur002548	Putative uncharacterized protein
			Sfur002549	Putative uncharacterized protein
			Sfur002550	Probable RNA-directed DNA polymerase from transposon BS
			Sfur002555	Actin-related protein 2/3 complex subunit 1A-B
			Sfur002569	Purine nucleoside phosphorylase
			Sfur002577	Putative uncharacterized protein
			Sfur002587	Putative uncharacterized protein
			Sfur002595	Putative uncharacterized protein
			Sfur002599	Craniofacial development protein 2
			Sfur002601	Ribonucleoside-diphosphate reductase subunit M2
			Sfur002604	Coiled-coil domain-containing protein 97
			Sfur002616	Alanine aminotransferase 2-like
			Sfur002624	-
			Sfur002631	RNA polymerase II subunit B1 CTD phosphatase Rpap2
			Sfur002645	Aprataxin
			Sfur002668	Putative uncharacterized protein
			Sfur002672	Low-density lipoprotein receptor-related protein 2
			Sfur002673	Tubulin beta chain
			Sfur002695	Putative uncharacterized protein
			Sfur002696	Tubulin alpha-1 chain
			Sfur002703	Putative uncharacterized protein
			Sfur002724	Calpain-C
			Sfur002730	Serine hydrolase-like protein
			Sfur002739	BTB/POZ domain-containing protein 2
			Sfur002746	Very-long-chain 3-oxoacyl-CoA reductase
			Sfur002767	Tyrosine-protein kinase Src64B
			Sfur002772	Circadian locomoter output cycles protein kaput
			Sfur002786	Malate dehydrogenase, mitochondrial
			Sfur002793	Roundabout homolog 2
			Sfur002817	Probable NADH dehydrogenase [ubiquinone] 1 alpha subcomplex subunit 12
			Sfur002827	UBX domain-containing protein 1
			Sfur002828	15-hydroxyprostaglandin dehydrogenase [NAD(+)]
			Sfur002833	Protein embryonic gonad
			Sfur002834	Peptidyl-prolyl cis-trans isomerase H
			Sfur002836	Formylglycine-generating enzyme
			Sfur002845	DNA repair protein XRCC1
			Sfur002847	Putative uncharacterized protein
			Sfur002850	Pancreatic lipase-related protein 2
			Sfur002851	Putative uncharacterized protein
			Sfur002862	Fatty acyl-CoA reductase 1
			Sfur002864	2-oxoglutarate and iron-dependent oxygenase domain-containing protein 3
			Sfur002875	Rac GTPase-activating protein 1
			Sfur002876	Probable ATP-dependent RNA helicase DDX17
			Sfur002886	UDP-N-acetylglucosamine--dolichyl-phosphate N-acetylglucosaminephosphotransferase
			Sfur002888	Sodium/calcium exchanger 1
			Sfur002894	BTB/POZ domain-containing protein 19
			Sfur002897	Enoyl-CoA delta isomerase 2
			Sfur002901	Cadherin-related tumor suppressor
			Sfur002923	Polypeptide N-acetylgalactosaminyltransferase 2
			Sfur002924	Phenoloxidase-activating factor 2
			Sfur002925	GPI ethanolamine phosphate transferase 1
			Sfur002933	Nucleoprotein TPR
			Sfur002960	Noggin
			Sfur002974	Pancreatic triacylglycerol lipase (Fragment)
			Sfur002977	ATP-binding cassette sub-family G member 1
			Sfur002981	Venom acid phosphatase Acph-1
			Sfur003002	ATP-dependent RNA helicase A
			Sfur003025	Actin-like protein 6B
			Sfur003030	Putative uncharacterized protein
			Sfur003040	Kinesin-like protein KIF23
			Sfur003053	Putative uncharacterized protein
			Sfur003057	Kelch-like protein 10
			Sfur003068	Protein THEM6
			Sfur003077	DNA cross-link repair 1A protein
			Sfur003094	Cadherin-related tumor suppressor
			Sfur003099	Glutamate receptor ionotropic, NMDA 2B
			Sfur003100	Protein peste
			Sfur003112	Protein brunelleschi
			Sfur003132	Sodium-dependent dopamine transporter
			Sfur003142	Mevalonate kinase
			Sfur003158	Luciferin sulfotransferase
			Sfur003159	Probable cytochrome P450 6a14
			Sfur003161	Lymphokine-activated killer T-cell-originated protein kinase
			Sfur003162	U4/U6 small nuclear ribonucleoprotein Prp31
			Sfur003164	Zinc metalloproteinase nas-14
			Sfur003165	Putative uncharacterized protein
			Sfur003173	Parathyroid hormone/parathyroid hormone-related peptide receptor
			Sfur003180	Putative uncharacterized protein
			Sfur003182	Superoxide dismutase [Cu-Zn]
			Sfur003185	Protein HGH1 homolog
			Sfur003192	UDP-glycosyltransferase UGT5
			Sfur003196	G-protein coupled receptor Mth2
			Sfur003200	eIF-2-alpha kinase activator GCN1
			Sfur003201	L-ascorbate oxidase
			Sfur003211	tRNA (adenine(58)-N(1))-methyltransferase catalytic subunit TRMT61A
			Sfur003212	Sodium- and chloride-dependent GABA transporter ine
			Sfur003228	Parathyroid hormone/parathyroid hormone-related peptide receptor
			Sfur003254	Putative uncharacterized protein
			Sfur003256	Replication factor C subunit 5
			Sfur003257	Annexin B10
			Sfur003263	Endoplasmic reticulum resident protein 44
			Sfur003266	A-kinase anchor protein 1, mitochondrial
			Sfur003275	Cytochrome b5-related protein
			Sfur003278	DNA-directed RNA polymerase II subunit RPB11
			Sfur003280	Protein NATD1
			Sfur003283	Putative uncharacterized protein
			Sfur003300	Ecdysone-induced protein 75B, isoform B
			Sfur003304	Unconventional myosin IC
			Sfur003307	Probable G-protein coupled receptor Mth-like 11
			Sfur003310	Glycine receptor subunit alpha-2
			Sfur003318	Putative uncharacterized protein
			Sfur003323	Carbohydrate-responsive element-binding protein
			Sfur003329	Syntaxin-1A
			Sfur003342	Putative uncharacterized protein
			Sfur003355	Prenylated Rab acceptor protein 1
			Sfur003362	Phospholipase A2 isozymes PA3A/PA3B/PA5
			Sfur003366	Cytochrome b5-related protein
			Sfur003369	UDP-glycosyltransferase UGT5
			Sfur003370	DNA ligase 1
			Sfur003371	Amyloid protein-binding protein 2
			Sfur003374	Separin
			Sfur003392	Putative uncharacterized protein
			Sfur003400	Putative uncharacterized protein
			Sfur003410	Ral GTPase-activating protein subunit beta
			Sfur003418	Putative uncharacterized protein
			Sfur003424	SEC14-like protein 1
			Sfur003434	Magnesium-dependent phosphatase 1
			Sfur003437	Putative uncharacterized protein
			Sfur003438	CAD protein
			Sfur003442	-
			Sfur003462	Carboxypeptidase M
			Sfur003469	SH3 domain-containing protein Dlish
			Sfur003473	Cilia- and flagella-associated protein 299
			Sfur003484	Tetratricopeptide repeat protein 21B
			Sfur003489	Putative uncharacterized protein
			Sfur003501	Cytochrome P450 4V2
			Sfur003502	Serine/threonine-protein kinase NLK
			Sfur003508	Putative uncharacterized protein
			Sfur003517	Lysosome membrane protein 2
			Sfur003519	tRNA (uracil-5-)-methyltransferase homolog A
			Sfur003520	Putative uncharacterized protein
			Sfur003528	Transcription initiation factor TFIID subunit 2
			Sfur003542	PRKR-interacting protein 1 homolog
			Sfur003547	Zinc metalloproteinase nas-13
			Sfur003563	Calcineurin-binding protein cabin-1
			Sfur003569	tRNA-specific adenosine deaminase 1
			Sfur003580	E3 ubiquitin-protein ligase MARCHF3
			Sfur003581	Putative uncharacterized protein
			Sfur003582	NAD(+) hydrolase sarm1
			Sfur003598	Protein deltex
			Sfur003600	P3 protein
			Sfur003606	Putative uncharacterized protein
			Sfur003607	RNA-binding protein cabeza
			Sfur003619	Putative uncharacterized protein
			Sfur003642	Putative uncharacterized protein
			Sfur003657	E3 ubiquitin-protein ligase MARCHF2
			Sfur003658	Smoothelin
			Sfur003664	Tectonin beta-propeller repeat-containing protein
			Sfur003666	Syntaxin-1A
			Sfur003676	Inositol polyphosphate 5-phosphatase K
			Sfur003677	Retinol dehydrogenase 14
			Sfur003689	Odorant receptor 10a
			Sfur003690	Apolipoprotein D
			Sfur003700	Estradiol 17-beta-dehydrogenase 11
			Sfur003704	Putative uncharacterized protein
			Sfur003731	Paxillin
			Sfur003735	rRNA methyltransferase 3, mitochondrial
			Sfur003744	Probable DNA replication complex GINS protein PSF2
			Sfur003745	Inosine-uridine preferring nucleoside hydrolase
			Sfur003749	RNA-binding protein with serine-rich domain 1-A
			Sfur003751	Putative uncharacterized protein
			Sfur003752	Putative uncharacterized protein
			Sfur003756	Vesicular glutamate transporter 3
			Sfur003758	Putative uncharacterized protein
			Sfur003759	FACT complex subunit Ssrp1
			Sfur003762	Putative uncharacterized protein
			Sfur003764	Putative uncharacterized protein
			Sfur003765	Solute carrier family 2, facilitated glucose transporter member 4
			Sfur003768	E3 ubiquitin-protein ligase Bre1
			Sfur003772	Putative uncharacterized protein
			Sfur003782	G-protein coupled receptor Mth2
			Sfur003783	Dolichol-phosphate mannosyltransferase subunit 1
			Sfur003784	Neuferricin
			Sfur003786	Parathyroid hormone/parathyroid hormone-related peptide receptor
			Sfur003789	tRNA (cytosine(72)-C(5))-methyltransferase NSUN6
			Sfur003790	Putative uncharacterized protein
			Sfur003791	Putative uncharacterized protein
			Sfur003793	Luciferin sulfotransferase
			Sfur003796	Putative uncharacterized protein
			Sfur003804	Cytochrome P450 315a1, mitochondrial
			Sfur003810	Putative uncharacterized protein
			Sfur003819	CD63 antigen
			Sfur003827	Putative uncharacterized protein
			Sfur003828	Cytochrome P450 306a1
			Sfur003829	Tigger transposable element-derived protein 2
			Sfur003837	Putative uncharacterized protein
			Sfur003853	Putative uncharacterized protein
			Sfur003860	Chaperone protein DnaJ
			Sfur003875	Pro-resilin
			Sfur003876	Decaprenyl-diphosphate synthase subunit 2
			Sfur003906	Lipase 1
			Sfur003909	Lipase 3
			Sfur003933	Proteasome subunit alpha type-6
			Sfur003971	Putative U5 small nuclear ribonucleoprotein 200 kDa helicase
			Sfur003975	Protein FAM50 homolog
			Sfur003977	Protein takeout
			Sfur003979	Pancreatic lipase-related protein 2
			Sfur003989	Lysine histidine transporter 2
			Sfur003991	Intraflagellar transport protein 140 homolog
			Sfur003997	Protein serrate
			Sfur004001	Transmembrane emp24 domain-containing protein eca
			Sfur004019	Putative deoxyribonuclease TATDN1
			Sfur004029	Serine/threonine-protein phosphatase PP1-gamma catalytic subunit A
			Sfur004035	Muscle LIM protein Mlp84B
			Sfur004042	Broad-complex core protein isoforms 1/2/3/4/5
			Sfur004047	Pogo transposable element with ZNF domain
			Sfur004050	Putative uncharacterized protein
			Sfur004072	High affinity cationic amino acid transporter 1
			Sfur004083	Mortality factor 4-like protein 1
			Sfur004090	Histone-lysine N-methyltransferase eggless
			Sfur004096	Calcitonin gene-related peptide type 1 receptor
			Sfur004099	Protein melted
			Sfur004107	Putative uncharacterized protein
			Sfur004116	Protein RER1
			Sfur004132	Ubiquitin carboxyl-terminal hydrolase 5
			Sfur004136	Tetratricopeptide repeat protein 36
			Sfur004150	Patched domain-containing protein 3
			Sfur004151	Echinoderm microtubule-associated protein-like CG42247
			Sfur004154	Protein melted
			Sfur004157	Serine/threonine-protein phosphatase PP1-gamma catalytic subunit A
			Sfur004159	Dynactin subunit 2
			Sfur004181	ORM1-like protein
			Sfur004182	Putative uncharacterized protein
			Sfur004192	E3 ubiquitin-protein ligase HECW2
			Sfur004207	Death-associated protein kinase related
			Sfur004212	High affinity cationic amino acid transporter 1
			Sfur004217	Putative uncharacterized protein
			Sfur004220	Putative uncharacterized protein
			Sfur004223	Serine/threonine-protein kinase 17A
			Sfur004229	Collagen alpha-3(VI) chain
			Sfur004232	Echinoderm microtubule-associated protein-like CG42247
			Sfur004248	AP-2 complex subunit mu
			Sfur004268	Acetyl-coenzyme A transporter 1
			Sfur004288	SOSS complex subunit C
			Sfur004295	Fibulin-7
			Sfur004313	Putative uncharacterized protein
			Sfur004324	Putative uncharacterized protein
			Sfur004330	Ejaculatory bulb-specific protein 3
			Sfur004335	Myosin-IIIa
			Sfur004336	Ejaculatory bulb-specific protein 3
			Sfur004342	PDZ domain-containing protein 2
			Sfur004371	Testis-specific serine/threonine-protein kinase 4
			Sfur004373	Ras GTPase-activating-like protein IQGAP1
			Sfur004380	Putative uncharacterized protein
			Sfur004383	Peptidylprolyl isomerase domain and WD repeat-containing protein 1
			Sfur004404	Proteasome subunit alpha type-4
			Sfur004407	Xanthine dehydrogenase
			Sfur004410	Farnesyl pyrophosphate synthase
			Sfur004415	Putative uncharacterized protein
			Sfur004421	Mitotic-spindle organizing protein 1
			Sfur004424	Putative uncharacterized protein
			Sfur004446	Fibrous sheath-interacting protein 2
			Sfur004450	Transmembrane emp24 domain-containing protein 6
			Sfur004455	Chorion peroxidase
			Sfur004459	N-sulphoglucosamine sulphohydrolase
			Sfur004463	Putative uncharacterized protein
			Sfur004465	Putative uncharacterized protein
			Sfur004469	BTB/POZ domain-containing protein 3
			Sfur004480	Serine protease Hayan
			Sfur004484	Minor histocompatibility antigen H13
			Sfur004486	Protein SET
			Sfur004491	DNA-directed RNA polymerases I, II, and III subunit RPABC1
			Sfur004497	Tctex1 domain-containing protein 2
			Sfur004504	PDZ domain-containing protein 2
			Sfur004509	Putative uncharacterized protein
			Sfur004514	Putative nuclease HARBI1
			Sfur004521	Ejaculatory bulb-specific protein 3
			Sfur004533	E-selectin
			Sfur004536	Allergen Tha p 1
			Sfur004552	Probable cytochrome P450 6a14
			Sfur004553	Caspase-1
			Sfur004560	RYamide receptor
			Sfur004563	Thymidine kinase 2, mitochondrial
			Sfur004571	Putative phosphatidate phosphatase
			Sfur004581	Growth arrest and DNA damage-inducible protein GADD45 alpha
			Sfur004587	Putative uncharacterized protein
			Sfur004598	-
			Sfur004599	Vesicle transport protein USE1
			Sfur004605	Peptidase inhibitor 16
			Sfur004612	Polyadenylate-binding protein 2
			Sfur004613	Putative GPI-anchor transamidase
			Sfur004627	Cohesin subunit SA-1
			Sfur004630	Putative uncharacterized protein
			Sfur004633	Putative uncharacterized protein
			Sfur004635	Eukaryotic translation elongation factor 1 epsilon-1
			Sfur004642	Cytochrome P450 4C1
			Sfur004647	Peptidyl-prolyl cis-trans isomerase B
			Sfur004656	Peptidyl-prolyl cis-trans isomerase A
			Sfur004671	Venom allergen 5
			Sfur004675	Putative uncharacterized protein
			Sfur004677	Putative uncharacterized protein
			Sfur004691	Ubiquitin-conjugating enzyme E2 R1
			Sfur004693	Coatomer subunit epsilon
			Sfur004694	Putative uncharacterized protein
			Sfur004696	Coiled-coil domain-containing protein 134
			Sfur004700	Putative uncharacterized protein
			Sfur004707	Putative uncharacterized protein
			Sfur004713	Phospholipase B1, membrane-associated
			Sfur004715	Putative uncharacterized protein
			Sfur004720	Defensin
			Sfur004740	Histidine triad nucleotide-binding protein 1
			Sfur004759	Major facilitator superfamily domain-containing protein 12
			Sfur004761	Tolloid-like protein 1
			Sfur004764	Ran GTPase-activating protein 1
			Sfur004777	Transitional endoplasmic reticulum ATPase TER94
			Sfur004779	GILT-like protein 1
			Sfur004784	Glutamine--fructose-6-phosphate aminotransferase [isomerizing] 2
			Sfur004788	Proteasome subunit beta type-2
			Sfur004790	Nuclear pore membrane glycoprotein 210
			Sfur004801	Putative uncharacterized protein
			Sfur004802	WD repeat-containing protein on Y chromosome
			Sfur004809	Pachytene checkpoint protein 2 homolog
			Sfur004816	Putative uncharacterized protein
			Sfur004822	Tyrosine decarboxylase
			Sfur004829	Putative uncharacterized protein
			Sfur004835	Putative ferric-chelate reductase 1 homolog
			Sfur004849	Putative uncharacterized protein
			Sfur004855	Putative uncharacterized protein
			Sfur004862	Probable protein BRICK1-B
			Sfur004863	Protein transport protein Sec24C
			Sfur004865	Putative uncharacterized protein
			Sfur004871	Trypsin 3A1
			Sfur004872	High-affinity choline transporter 1
			Sfur004874	Phosphoserine phosphatase
			Sfur004876	Protein patched
			Sfur004883	Probable U3 small nucleolar RNA-associated protein 11
			Sfur004885	17-beta-hydroxysteroid dehydrogenase 13
			Sfur004887	Ethanolamine-phosphate phospho-lyase
			Sfur004891	CDGSH iron-sulfur domain-containing protein 2 homolog
			Sfur004900	Fanconi-associated nuclease 1
			Sfur004906	Lipase maturation factor 2
			Sfur004914	THUMP domain-containing protein 3
			Sfur004918	Glucosidase 2 subunit beta
			Sfur004919	LINE-1 retrotransposable element ORF2 protein
			Sfur004922	Ejaculatory bulb-specific protein 3
			Sfur004927	Tetratricopeptide repeat protein 25
			Sfur004940	Fanconi anemia group I protein homolog
			Sfur004945	Adenylate kinase 9
			Sfur004946	Sestrin homolog
			Sfur004963	Ejaculatory bulb-specific protein 3
			Sfur004964	RNA 3'-terminal phosphate cyclase
			Sfur004965	Endoplasmic reticulum metallopeptidase 1
			Sfur004970	Putative uncharacterized protein
			Sfur004971	Zinc finger protein 423 homolog
			Sfur004981	Putative uncharacterized protein
			Sfur004985	Peptidyl-prolyl cis-trans isomerase
			Sfur004996	Mitochondrial import inner membrane translocase subunit Tim23
			Sfur005004	Putative uncharacterized protein
			Sfur005008	Zinc finger matrin-type protein CG9776
			Sfur005014	Putative uncharacterized protein
			Sfur005017	Putative uncharacterized protein
			Sfur005022	Transmembrane protein 214-A
			Sfur005023	Muscle-specific protein 20
			Sfur005043	Ejaculatory bulb-specific protein 3
			Sfur005046	Tubulin beta-3 chain
			Sfur005053	Tafazzin homolog
			Sfur005061	Putative uncharacterized protein
			Sfur005064	Protein anon-37Cs
			Sfur005069	Putative uncharacterized protein
			Sfur005078	Transcription initiation factor TFIID subunit 13
			Sfur005101	CDK5 regulatory subunit-associated protein 2
			Sfur005103	Putative uncharacterized protein
			Sfur005107	Angiogenic factor with G patch and FHA domains 1
			Sfur005108	Leukotriene A-4 hydrolase
			Sfur005121	Putative uncharacterized protein
			Sfur005122	Retrovirus-related Pol polyprotein from transposon 412
			Sfur005125	Putative uncharacterized protein
			Sfur005128	Putative uncharacterized protein
			Sfur005136	Putative uncharacterized protein
			Sfur005138	Transcription factor TFIIIB component B'' homolog
			Sfur005158	Putative uncharacterized protein
			Sfur005166	Putative uncharacterized protein
			Sfur005167	Kinesin-like protein KIF20B
			Sfur005178	Structural maintenance of chromosomes protein 2
			Sfur005181	Putative uncharacterized protein
			Sfur005183	NADPH oxidase 5
			Sfur005188	Biogenesis of lysosome-related organelles complex 1 subunit 4
			Sfur005192	Coiled-coil domain-containing protein 112
			Sfur005193	Diphosphomevalonate decarboxylase
			Sfur005197	Heparan-alpha-glucosaminide N-acetyltransferase
			Sfur005208	Putative uncharacterized protein
			Sfur005213	Putative uncharacterized protein
			Sfur005238	Putative uncharacterized protein
			Sfur005244	Elongation of very long chain fatty acids protein
			Sfur005262	Forkhead box protein O
			Sfur005278	Histone H2A.V
			Sfur005279	Glucose-6-phosphate 1-epimerase
			Sfur005284	Putative uncharacterized protein
			Sfur005293	Transcription factor sem-2
			Sfur005297	Probable RNA-directed DNA polymerase from transposon BS
			Sfur005302	Fukutin
			Sfur005308	Gonadotropin-releasing hormone II receptor
			Sfur005317	Probable cytochrome P450 6a13
			Sfur005323	Myocyte-specific enhancer factor 2
			Sfur005326	T-complex protein 11-like protein 1
			Sfur005328	Proton-coupled folate transporter
			Sfur005329	Phospholipase B1, membrane-associated
			Sfur005332	Neuroglian
			Sfur005336	Glutathione S-transferase
			Sfur005342	Growth arrest and DNA damage-inducible protein GADD45 gamma
			Sfur005353	Putative uncharacterized protein
			Sfur005358	Putative uncharacterized protein
			Sfur005382	Polycystin-2
			Sfur005392	U-scoloptoxin(01)-Cw1a
			Sfur005401	Unconventional myosin-XIX
			Sfur005404	Ribonucleoside-diphosphate reductase large subunit
			Sfur005415	G1/S-specific cyclin-E
			Sfur005418	Putative uncharacterized protein
			Sfur005445	Peroxiredoxin-4
			Sfur005461	Low-density lipoprotein receptor (Fragment)
			Sfur005462	Replication protein A 70 kDa DNA-binding subunit
			Sfur005470	Putative uncharacterized protein
			Sfur005474	CCR4-NOT transcription complex subunit 10
			Sfur005482	Putative uncharacterized protein
			Sfur005488	Phosphoglycerate kinase 1
			Sfur005496	Heterogeneous nuclear ribonucleoprotein K
			Sfur005498	Putative uncharacterized protein
			Sfur005509	Nicastrin
			Sfur005514	COBW domain-containing protein 2
			Sfur005516	U6 snRNA-associated Sm-like protein LSm6
			Sfur005530	Putative uncharacterized protein
			Sfur005534	Sodium- and chloride-dependent glycine transporter 2
			Sfur005538	Ubiquitin-conjugating enzyme E2 T
			Sfur005549	Putative uncharacterized protein
			Sfur005567	Serrate RNA effector molecule homolog
			Sfur005568	Phospholipase B1, membrane-associated
			Sfur005571	Translocon-associated protein subunit beta
			Sfur005578	Glutathione peroxidase 6
			Sfur005579	Organic cation transporter protein
			Sfur005584	Alpha-tocopherol transfer protein-like
			Sfur005590	INO80 complex subunit C
			Sfur005596	Ankyrin-3
			Sfur005599	Putative uncharacterized protein
			Sfur005617	Putative uncharacterized protein
			Sfur005618	Gonadotropin-releasing hormone II receptor
			Sfur005627	Zwei Ig domain protein zig-8
			Sfur005629	Phosphatidylinositol glycan anchor biosynthesis class U protein
			Sfur005641	Cytosol aminopeptidase
			Sfur005644	U-scoloptoxin(01)-Cw1a
			Sfur005656	Putative uncharacterized protein
			Sfur005662	Ejaculatory bulb-specific protein 3
			Sfur005664	Putative glycerol kinase 5
			Sfur005695	Protein artemis
			Sfur005707	Putative uncharacterized protein
			Sfur005709	Dynein light chain roadblock-type 2
			Sfur005716	Progestin and adipoQ receptor family member 3
			Sfur005717	THO complex subunit 6 homolog
			Sfur005721	Protein fem-1 homolog B
			Sfur005723	Troponin C, isoallergen Bla g 6.0201
			Sfur005726	La-related protein 7
			Sfur005737	Putative uncharacterized protein
			Sfur005739	Putative uncharacterized protein
			Sfur005753	Thymidine kinase 2, mitochondrial
			Sfur005765	Putative uncharacterized protein
			Sfur005769	Lamin Dm0
			Sfur005776	Putative uncharacterized protein
			Sfur005777	Calcium-independent phospholipase A2-gamma
			Sfur005780	3-hydroxy-3-methylglutaryl-coenzyme A reductase
			Sfur005785	Putative uncharacterized protein
			Sfur005789	Putative uncharacterized protein
			Sfur005793	Protein prickle
			Sfur005794	Prefoldin subunit 1
			Sfur005796	Peptidyl-alpha-hydroxyglycine alpha-amidating lyase 1
			Sfur005801	Putative uncharacterized protein
			Sfur005802	Putative uncharacterized protein
			Sfur005803	PDZ domain-containing protein 2
			Sfur005808	Serine proteinase stubble
			Sfur005809	Cyclin-Q
			Sfur005812	RNA-binding protein spenito
			Sfur005818	Putative uncharacterized protein
			Sfur005823	Putative uncharacterized protein
			Sfur005835	Centromere/kinetochore protein zw10 homolog
			Sfur005841	RB1-inducible coiled-coil protein 1
			Sfur005842	Protein peste
			Sfur005857	Putative uncharacterized protein
			Sfur005866	Putative uncharacterized protein
			Sfur005877	Putative uncharacterized protein
			Sfur005880	Proliferating cell nuclear antigen
			Sfur005884	Putative uncharacterized protein
			Sfur005885	Counting factor associated protein D
			Sfur005894	Cuticle protein 7
			Sfur005895	DNA-directed RNA polymerases I, II, and III subunit RPABC2
			Sfur005903	Putative uncharacterized protein
			Sfur005907	Luciferin sulfotransferase
			Sfur005909	Cardioacceleratory peptide receptor
			Sfur005914	Putative uncharacterized protein
			Sfur005921	Protein sprint
			Sfur005925	Putative uncharacterized protein
			Sfur005937	Cuticle protein 19
			Sfur005942	Putative uncharacterized protein
			Sfur005958	Putative uncharacterized protein
			Sfur005959	Transmembrane protein fend
			Sfur005965	Putative uncharacterized protein
			Sfur005967	Cuticle protein 19
			Sfur005970	Tachykinin-like peptides receptor 99D
			Sfur005971	Protein Flattop
			Sfur005972	Cuticle protein 19
			Sfur005981	Tubulin-specific chaperone cofactor E-like protein
			Sfur005982	Nuclear factor related to kappa-B-binding protein
			Sfur005985	Translocation protein SEC63 homolog
			Sfur005989	Endocuticle structural glycoprotein SgAbd-2
			Sfur005991	Helix-loop-helix protein delilah
			Sfur005992	Cadherin-23
			Sfur005994	Protein transport protein Sec61 subunit gamma
			Sfur005999	Putative uncharacterized protein
			Sfur006005	Putative uncharacterized protein
			Sfur006006	Putative uncharacterized protein
			Sfur006014	Putative uncharacterized protein
			Sfur006020	Anaphase-promoting complex subunit 1
			Sfur006026	Putative uncharacterized protein
			Sfur006029	Putative uncharacterized protein
			Sfur006033	Mitochondrial 2-oxodicarboxylate carrier
			Sfur006039	Cuticle protein
			Sfur006045	Endocuticle structural glycoprotein SgAbd-8
			Sfur006057	Putative uncharacterized protein
			Sfur006058	Tryptophan--tRNA ligase, mitochondrial
			Sfur006062	Cuticle protein 19
			Sfur006074	Protein TIS11
			Sfur006078	Endocuticle structural glycoprotein SgAbd-2
			Sfur006079	Cilia- and flagella-associated protein 61
			Sfur006084	Putative uncharacterized protein
			Sfur006085	Organic solute transporter alpha-like protein
			Sfur006087	Protein sprint
			Sfur006090	Endocuticle structural glycoprotein SgAbd-8
			Sfur006093	D-beta-hydroxybutyrate dehydrogenase, mitochondrial
			Sfur006097	Putative uncharacterized protein
			Sfur006102	Probable cytochrome P450 49a1
			Sfur006104	Putative uncharacterized protein
			Sfur006106	Dopamine N-acetyltransferase
			Sfur006108	Putative uncharacterized protein
			Sfur006110	Cytosol aminopeptidase
			Sfur006111	Putative uncharacterized protein
			Sfur006115	Transmembrane protein 50A
			Sfur006117	Luciferin sulfotransferase
			Sfur006119	Putative uncharacterized protein
			Sfur006122	Putative uncharacterized protein
			Sfur006128	Cuticle protein 19
			Sfur006129	Protein tramtrack, alpha isoform
			Sfur006139	Putative uncharacterized protein
			Sfur006140	Putative uncharacterized protein
			Sfur006141	Putative uncharacterized protein
			Sfur006142	Putative uncharacterized protein
			Sfur006151	Probable 4-coumarate--CoA ligase 3
			Sfur006153	Putative uncharacterized protein
			Sfur006164	Putative uncharacterized protein
			Sfur006173	Putative uncharacterized protein
			Sfur006176	Larval cuticle protein A3A
			Sfur006194	Organic solute transporter alpha-like protein
			Sfur006200	Broad-complex core protein isoforms 1/2/3/4/5
			Sfur006204	Putative uncharacterized protein
			Sfur006208	Putative uncharacterized protein
			Sfur006211	Putative uncharacterized protein
			Sfur006218	Choline/ethanolamine kinase
			Sfur006228	Putative uncharacterized protein
			Sfur006233	Copper-transporting ATPase 1
			Sfur006235	Exportin-2
			Sfur006236	Putative uncharacterized protein
			Sfur006238	Nipped-B-like protein
			Sfur006246	General odorant-binding protein 70
			Sfur006248	Protein spaetzle 5
			Sfur006252	Putative uncharacterized protein
			Sfur006256	Symplekin
			Sfur006268	Kunitz-type serine protease inhibitor 1
			Sfur006274	Uncharacterized protein CG43867
			Sfur006275	Cytochrome P450 3A11
			Sfur006281	Quinone oxidoreductase-like protein 1
			Sfur006284	Transmembrane protein fend
			Sfur006300	Lipase 1
			Sfur006303	Putative uncharacterized protein
			Sfur006309	Putative uncharacterized protein
			Sfur006317	Putative uncharacterized protein
			Sfur006325	Exportin-2
			Sfur006339	Putative uncharacterized protein
			Sfur006345	Neuroglobin
			Sfur006352	Endocuticle structural glycoprotein SgAbd-9
			Sfur006362	Symplekin
			Sfur006364	Cytochrome P450 4C1
			Sfur006366	Putative uncharacterized protein
			Sfur006368	Putative uncharacterized protein
			Sfur006371	Hypoxia up-regulated protein 1
			Sfur006372	Neprilysin-11
			Sfur006374	Leucine-rich repeat-containing protein 71
			Sfur006377	SH3 domain-containing protein Dlish
			Sfur006378	Radial spoke head protein 3 homolog
			Sfur006380	Protein transport protein Sec61 subunit alpha isoform 2
			Sfur006381	Pupal cuticle protein 36
			Sfur006389	Fatty acyl-CoA reductase wat
			Sfur006390	Putative uncharacterized protein
			Sfur006408	Neurotrophin 1
			Sfur006409	Putative uncharacterized protein
			Sfur006413	Transmembrane protein fend
			Sfur006419	Putative uncharacterized protein
			Sfur006421	Cytochrome P450 4C1
			Sfur006427	Insulin-like receptor
			Sfur006431	Putative uncharacterized protein
			Sfur006433	PI-PLC X domain-containing protein 1
			Sfur006444	Putative uncharacterized protein
			Sfur006446	Putative uncharacterized protein
			Sfur006451	Putative uncharacterized protein
			Sfur006454	Putative uncharacterized protein
			Sfur006457	Putative uncharacterized protein
			Sfur006476	Putative uncharacterized protein
			Sfur006482	Protein sprint
			Sfur006488	Gamma-butyrobetaine dioxygenase
			Sfur006493	Protein lethal(3)malignant blood neoplasm 1
			Sfur006494	Putative uncharacterized protein
			Sfur006496	Protein sprint
			Sfur006499	Dopamine N-acetyltransferase
			Sfur006506	Helix-loop-helix protein delilah
			Sfur006509	Putative uncharacterized protein
			Sfur006511	Putative uncharacterized protein
			Sfur006520	Putative uncharacterized protein
			Sfur006521	Putative uncharacterized protein
			Sfur006522	Putative uncharacterized protein
			Sfur006523	Putative uncharacterized protein
			Sfur006528	Putative uncharacterized protein
			Sfur006530	Putative uncharacterized protein
			Sfur006531	Tyrosine--tRNA ligase, cytoplasmic
			Sfur006535	Putative uncharacterized protein
			Sfur006538	Carbonic anhydrase 9
			Sfur006539	Alpha-tocopherol transfer protein
			Sfur006540	Uncharacterized protein K02A2.6
			Sfur006564	Protein-cysteine N-palmitoyltransferase HHAT
			Sfur006568	Retrovirus-related Pol polyprotein from transposon TNT 1-94
			Sfur006576	Putative uncharacterized protein
			Sfur006592	Putative uncharacterized protein
			Sfur006594	3'-5' RNA helicase YTHDC2
			Sfur006606	Arrestin domain-containing protein 17
			Sfur006608	Chromatin assembly factor 1 subunit A-A
			Sfur006618	Putative uncharacterized protein
			Sfur006631	Synaptic vesicle glycoprotein 2B
			Sfur006651	Uncharacterized 50 kDa protein in type I retrotransposable element R1DM
			Sfur006653	Interferon-related developmental regulator 2
			Sfur006666	Putative uncharacterized protein
			Sfur006684	Nose resistant to fluoxetine protein 6
			Sfur006696	DmX-like protein 2
			Sfur006701	Alpha-tocopherol transfer protein-like
			Sfur006712	Structural maintenance of chromosomes protein 4
			Sfur006724	Neuroendocrine convertase 1
			Sfur006727	Putative uncharacterized protein
			Sfur006731	Elongation of very long chain fatty acids protein 4
			Sfur006735	Probable phosphoglycerate kinase
			Sfur006745	Semaphorin-2A
			Sfur006756	Putative fatty acyl-CoA reductase CG5065
			Sfur006762	Putative uncharacterized protein
			Sfur006764	Putative uncharacterized protein
			Sfur006769	Putative uncharacterized protein
			Sfur006772	Fatty acyl-CoA reductase wat
			Sfur006779	Putative uncharacterized protein
			Sfur006780	Putative uncharacterized protein
			Sfur006786	Alpha-tocopherol transfer protein-like
			Sfur006792	Putative uncharacterized protein
			Sfur006821	Casein kinase I isoform gamma-1
			Sfur006825	Retinol-binding protein pinta
			Sfur006826	Transcription elongation factor 1 homolog
			Sfur006827	Putative uncharacterized protein
			Sfur006836	Putative uncharacterized protein
			Sfur006841	Prostaglandin E synthase
			Sfur006845	Nuclear cap-binding protein subunit 1
			Sfur006861	Alpha-tocopherol transfer protein-like
			Sfur006865	Casein kinase I isoform gamma-2
			Sfur006894	Probable glucosamine 6-phosphate N-acetyltransferase
			Sfur006905	Activated Cdc42 kinase Ack
			Sfur006906	Putative uncharacterized protein
			Sfur006908	Brahma-associated protein of 60 kDa
			Sfur006909	Probable RNA-directed DNA polymerase from transposon BS
			Sfur006915	UDP-glucose:glycoprotein glucosyltransferase
			Sfur006939	LIM and SH3 domain protein F42H10.3
			Sfur006940	Alpha-tocopherol transfer protein-like
			Sfur006951	Putative fatty acyl-CoA reductase CG5065
			Sfur006953	Putative fatty acyl-CoA reductase CG8306
			Sfur006955	Putative uncharacterized protein
			Sfur006966	Protein seele
			Sfur006971	Agrin
			Sfur006981	Zinc metalloproteinase nas-15
			Sfur006982	Solute carrier family 26 member 10
			Sfur006992	Transmembrane emp24 domain-containing protein 2
			Sfur006994	Putative uncharacterized protein
			Sfur006998	Alpha-tocopherol transfer protein-like
			Sfur007011	Krueppel-like factor 2
			Sfur007015	Fas apoptotic inhibitory molecule 1
			Sfur007020	Alpha-tocopherol transfer protein-like
			Sfur007035	Putative uncharacterized protein
			Sfur007041	Retinol-binding protein pinta
			Sfur007050	Protein yellow
			Sfur007057	Mitogen-activated protein kinase-binding protein 1
			Sfur007058	Odorant receptor coreceptor
			Sfur007062	Glucose dehydrogenase [FAD, quinone]
			Sfur007067	Tubulointerstitial nephritis antigen-like
			Sfur007076	Pyruvate dehydrogenase E1 component subunit beta, mitochondrial
			Sfur007088	Adhesion G-protein coupled receptor G6
			Sfur007090	Putative uncharacterized protein
			Sfur007091	Zinc finger protein 367
			Sfur007093	Transmembrane channel-like protein 3
			Sfur007112	Trifunctional nucleotide phosphoesterase protein YfkN
			Sfur007115	Laminin subunit beta-1
			Sfur007136	Glucose dehydrogenase [FAD, quinone]
			Sfur007142	Interferon-inducible double-stranded RNA-dependent protein kinase activator A homolog A
			Sfur007170	Extracellular serine/threonine protein kinase four-jointed
			Sfur007172	Probable RNA-directed DNA polymerase from transposon BS
			Sfur007189	Prenylcysteine oxidase 1
			Sfur007194	Ribonucleoprotein PTB-binding 2
			Sfur007212	Putative uncharacterized protein
			Sfur007226	Putative uncharacterized protein
			Sfur007230	Thymidine kinase 2, mitochondrial
			Sfur007267	Plasma kallikrein
			Sfur007273	Protein ERGIC-53
			Sfur007281	Synaptic vesicle 2-related protein
			Sfur007287	KxDL motif-containing protein CG10681
			Sfur007288	Prolow-density lipoprotein receptor-related protein 1
			Sfur007298	Putative uncharacterized protein
			Sfur007301	Putative uncharacterized protein
			Sfur007307	Putative uncharacterized protein
			Sfur007339	Putative uncharacterized protein
			Sfur007344	Serine proteinase stubble
			Sfur007351	Putative uncharacterized protein
			Sfur007376	L-threonine ammonia-lyase
			Sfur007380	Clotting factor C
			Sfur007397	Putative uncharacterized protein
			Sfur007412	Putative uncharacterized protein
			Sfur007443	Probable nuclear hormone receptor HR3
			Sfur007447	Glucose dehydrogenase [FAD, quinone]
			Sfur007449	Dihydropyrimidinase
			Sfur007457	Actin-related protein 2/3 complex subunit 4
			Sfur007459	MAM and LDL-receptor class A domain-containing protein 2 (Fragment)
			Sfur007463	Fatty acid synthase
			Sfur007465	Rhophilin-2
			Sfur007481	Glucose dehydrogenase [FAD, quinone]
			Sfur007483	Fasciclin-3
			Sfur007488	Protein seele
			Sfur007492	Cuticlin-1
			Sfur007497	Vitellogenin
			Sfur007505	Putative uncharacterized protein
			Sfur007516	Tyrosine-protein phosphatase 69D
			Sfur007520	Putative uncharacterized protein
			Sfur007534	Death-associated protein 1
			Sfur007535	Sulfate transporter
			Sfur007538	Very-long-chain 3-oxoacyl-CoA reductase
			Sfur007548	Translin
			Sfur007556	Ras-related protein Rab-7L1
			Sfur007561	Ankyrin repeat, SAM and basic leucine zipper domain-containing protein 1
			Sfur007574	Putative uncharacterized protein
			Sfur007575	Contactin
			Sfur007577	Putative uncharacterized protein
			Sfur007578	Long-chain fatty acid transport protein 4
			Sfur007589	Protein BTG1
			Sfur007597	Putative uncharacterized protein
			Sfur007609	Putative uncharacterized protein
			Sfur007623	PiggyBac transposable element-derived protein 4
			Sfur007624	Kinetochore-associated protein 1
			Sfur007638	Carbohydrate sulfotransferase 11
			Sfur007641	Putative uncharacterized protein
			Sfur007652	Hexuronate transporter
			Sfur007656	Zinc metalloproteinase nas-15
			Sfur007680	Putative uncharacterized protein
			Sfur007688	Polycomb protein eed
			Sfur007692	Ubiquitin-conjugating enzyme E2 C
			Sfur007701	Peroxiredoxin 1
			Sfur007704	Putative uncharacterized protein
			Sfur007714	Acetyl-CoA carboxylase
			Sfur007723	Carbohydrate sulfotransferase 11
			Sfur007726	Putative fatty acyl-CoA reductase CG5065
			Sfur007734	Vitellogenin-1
			Sfur007736	Serine protease filzig
			Sfur007741	Calcium/calmodulin-dependent protein kinase kinase 1
			Sfur007752	U-scoloptoxin(01)-Cw1a
			Sfur007759	U-scoloptoxin(01)-Er1a
			Sfur007763	Nuclear factor interleukin-3-regulated protein
			Sfur007767	Putative uncharacterized protein
			Sfur007771	Cuticlin-4
			Sfur007789	Transcription factor AP-2-epsilon
			Sfur007790	Putative uncharacterized protein
			Sfur007792	DnaJ homolog subfamily C member 25 homolog
			Sfur007796	Probable RNA-directed DNA polymerase from transposon BS
			Sfur007797	Bone morphogenetic protein receptor type-2
			Sfur007802	Rhophilin-2
			Sfur007825	Rab11 family-interacting protein 1
			Sfur007830	Dolichol-phosphate mannosyltransferase subunit 1
			Sfur007841	Beta-1,3-galactosyltransferase 1
			Sfur007842	Protein Hook homolog 1
			Sfur007844	Glucose dehydrogenase [FAD, quinone]
			Sfur007851	Putative uncharacterized protein
			Sfur007859	Anillin
			Sfur007863	Putative uncharacterized protein
			Sfur007876	Protein bric-a-brac 1
			Sfur007883	O-acyltransferase like protein
			Sfur007891	Trehalase
			Sfur007895	Scavenger receptor class B member 1
			Sfur007901	Putative uncharacterized protein
			Sfur007915	Obscurin
			Sfur007922	Putative tyrosine-protein kinase Wsck
			Sfur007924	Dolichyl-diphosphooligosaccharide--protein glycosyltransferase subunit 1
			Sfur007930	Putative uncharacterized protein
			Sfur007933	SH3 domain-binding protein 5-like
			Sfur007936	Stromal membrane-associated protein 1
			Sfur007941	Serine proteinase stubble
			Sfur007942	Fumarylacetoacetase
			Sfur007952	Putative uncharacterized protein
			Sfur007959	Zinc finger MYM-type protein 1
			Sfur007960	Putative uncharacterized protein
			Sfur007970	Putative uncharacterized protein
			Sfur007976	Calmodulin-binding transcription activator 1
			Sfur007979	Putative uncharacterized protein
			Sfur007998	Putative uncharacterized protein
			Sfur008014	Transmembrane protease serine 3
			Sfur008019	Putative uncharacterized protein
			Sfur008068	Cytosolic carboxypeptidase Nna1
			Sfur008084	Patronin
			Sfur008088	Growth factor receptor-bound protein 14
			Sfur008099	Pre-mRNA-splicing factor syf1 homolog
			Sfur008113	Valine--tRNA ligase
			Sfur008118	Negative elongation factor B
			Sfur008124	Alpha-tocopherol transfer protein-like
			Sfur008125	WD repeat-containing protein 35
			Sfur008139	Cytochrome P450 4g15
			Sfur008141	Inner centromere protein B
			Sfur008153	Major facilitator superfamily domain-containing protein 6
			Sfur008158	PiggyBac transposable element-derived protein 4
			Sfur008160	Putative uncharacterized protein
			Sfur008169	-
			Sfur008171	Small nuclear ribonucleoprotein-associated protein B
			Sfur008183	NF-kappa-B inhibitor-interacting Ras-like protein
			Sfur008184	DNA polymerase delta catalytic subunit
			Sfur008185	Putative uncharacterized protein
			Sfur008187	Glyceraldehyde-3-phosphate dehydrogenase
			Sfur008193	Probable signal peptidase complex subunit 2
			Sfur008200	-
			Sfur008202	Retinaldehyde-binding protein 1
			Sfur008209	Putative uncharacterized protein
			Sfur008211	Synaptic vesicle membrane protein VAT-1
			Sfur008225	A disintegrin and metalloproteinase with thrombospondin motifs 12
			Sfur008227	Probable sodium/potassium/calcium exchanger CG1090
			Sfur008231	Periaxin
			Sfur008235	Putative uncharacterized protein
			Sfur008236	Mannose-P-dolichol utilization defect 1 protein homolog
			Sfur008237	Alanine--tRNA ligase, cytoplasmic
			Sfur008251	Putative uncharacterized protein
			Sfur008253	Tyrosine-protein phosphatase non-receptor type 11
			Sfur008254	General odorant-binding protein 83a
			Sfur008260	Large neutral amino acids transporter small subunit 1
			Sfur008263	Cytochrome P450 4C1
			Sfur008271	Transmembrane protein 69
			Sfur008276	Putative uncharacterized protein
			Sfur008299	Putative uncharacterized protein
			Sfur008300	Coronin-7
			Sfur008312	Aurora kinase B-A
			Sfur008329	Protein muscleblind
			Sfur008333	Chymotrypsin-1
			Sfur008336	Putative uncharacterized protein
			Sfur008342	Fatty acyl-CoA reductase wat
			Sfur008343	Putative uncharacterized protein
			Sfur008345	Methylthioribulose-1-phosphate dehydratase
			Sfur008347	Putative uncharacterized protein
			Sfur008351	Fatty acyl-CoA reductase wat
			Sfur008362	Bcl-2-related ovarian killer protein homolog A
			Sfur008374	Arylsulfatase J
			Sfur008376	Tectonin beta-propeller repeat-containing protein 2
			Sfur008378	Spaetzle-processing enzyme
			Sfur008383	Cholecystokinin receptor
			Sfur008397	Endoplasmic reticulum-Golgi intermediate compartment protein 3
			Sfur008400	Putative methyltransferase DDB_G0268948
			Sfur008404	Whirlin
			Sfur008405	D-2-hydroxyglutarate dehydrogenase, mitochondrial
			Sfur008414	Putative uncharacterized protein
			Sfur008416	Fl(2)d-associated complex component
			Sfur008419	Pleckstrin homology domain-containing family G member 1
			Sfur008420	Solute carrier family 23 member 2
			Sfur008425	Putative uncharacterized protein
			Sfur008436	Transcription elongation factor S-II
			Sfur008452	Endochitinase
			Sfur008454	Ankyrin repeat and BTB/POZ domain-containing protein 2
			Sfur008457	Alanine--tRNA ligase, cytoplasmic
			Sfur008486	DNA primase large subunit
			Sfur008490	Putative uncharacterized protein
			Sfur008493	Trypsin-1
			Sfur008497	Putative uncharacterized protein
			Sfur008501	Saccharopine dehydrogenase-like oxidoreductase
			Sfur008503	Putative uncharacterized protein
			Sfur008504	cAMP-dependent protein kinase catalytic subunit 1
			Sfur008509	Copia protein
			Sfur008511	Pyruvate kinase
			Sfur008514	Origin recognition complex subunit 1
			Sfur008520	RNA-binding protein Rsf1
			Sfur008523	Rho guanine nucleotide exchange factor 7
			Sfur008531	Coiled-coil domain-containing protein AGAP005037
			Sfur008550	Basement membrane-specific heparan sulfate proteoglycan core protein
			Sfur008554	ADP-ribosylation factor-like protein 5B
			Sfur008559	Putative uncharacterized protein
			Sfur008566	Cell adhesion molecule 3
			Sfur008567	Putative uncharacterized protein
			Sfur008569	Meiotic recombination protein SPO11
			Sfur008572	Proton-coupled amino acid transporter-like protein pathetic
			Sfur008580	Endoplasmic reticulum-Golgi intermediate compartment protein 2
			Sfur008588	EGF domain-specific O-linked N-acetylglucosamine transferase
			Sfur008590	RNA-binding protein 45
			Sfur008604	Chitin synthase chs-2
			Sfur008615	Putative uncharacterized protein
			Sfur008617	Peroxiredoxin-6
			Sfur008637	Putative uncharacterized protein
			Sfur008639	Sister chromatid cohesion protein DCC1
			Sfur008657	Alpha-methylacyl-CoA racemase
			Sfur008662	Putative uncharacterized protein
			Sfur008669	Putative uncharacterized protein
			Sfur008676	Multiple inositol polyphosphate phosphatase 1
			Sfur008677	Putative uncharacterized protein
			Sfur008678	Carnitine O-acetyltransferase
			Sfur008681	Putative uncharacterized protein
			Sfur008684	Mitochondrial amidoxime-reducing component 1
			Sfur008704	Homocysteine S-methyltransferase YbgG
			Sfur008708	Putative uncharacterized protein
			Sfur008714	Kinesin-like protein KIF18A
			Sfur008719	ALK tyrosine kinase receptor
			Sfur008722	Inactive tyrosine-protein kinase 7
			Sfur008731	Retinoic acid receptor RXR
			Sfur008733	Tonsoku-like protein
			Sfur008739	Putative uncharacterized protein
			Sfur008761	Suppressor of cytokine signaling 5
			Sfur008764	Iodotyrosine deiodinase 1
			Sfur008771	Alpha-tocopherol transfer protein
			Sfur008772	Dual specificity tyrosine-phosphorylation-regulated kinase 2
			Sfur008774	Cytosol aminopeptidase
			Sfur008779	Chimeric ERCC6-PGBD3 protein
			Sfur008782	Nucleoporin Nup37
			Sfur008789	Putative uncharacterized protein
			Sfur008831	Clavesin-1
			Sfur008843	Protein sly1 homolog
			Sfur008852	Zinc transporter zipt-7.2
			Sfur008860	Death-associated protein kinase related
			Sfur008864	Sex peptide receptor
			Sfur008871	Actin-related protein 2/3 complex subunit 5-B
			Sfur008872	Putative uncharacterized protein
			Sfur008878	Putative uncharacterized protein
			Sfur008892	Pro-resilin
			Sfur008896	Thioredoxin reductase-like selenoprotein T homolog CG3887
			Sfur008908	Periostin
			Sfur008909	M-phase phosphoprotein 6
			Sfur008914	Glycerol-3-phosphate dehydrogenase, mitochondrial
			Sfur008918	Uncharacterized protein C05D11.1
			Sfur008919	Uncharacterized protein C12B10.15c
			Sfur008921	Protein RCC2
			Sfur008932	Putative uncharacterized protein
			Sfur008940	Origin recognition complex subunit 5
			Sfur008942	Putative uncharacterized protein
			Sfur008948	Vitellogenic carboxypeptidase
			Sfur008961	Protein transport protein Sec61 subunit beta
			Sfur008964	Putative uncharacterized protein
			Sfur008966	Sodium/potassium/calcium exchanger 3
			Sfur008970	Tigger transposable element-derived protein 1
			Sfur009002	Putative uncharacterized protein
			Sfur009009	Homologous-pairing protein 2 homolog
			Sfur009016	Putative uncharacterized protein
			Sfur009020	Arylsulfatase B
			Sfur009023	Thioredoxin-related transmembrane protein 1
			Sfur009028	Cytochrome P450 4g15
			Sfur009031	Histidine--tRNA ligase
			Sfur009033	Putative uncharacterized protein
			Sfur009036	Serine/threonine-protein kinase PLK1
			Sfur009038	Putative uncharacterized protein
			Sfur009043	Putative fatty acyl-CoA reductase CG5065
			Sfur009049	m7GpppX diphosphatase
			Sfur009057	3,4-dihydroxyphenylacetaldehyde synthase
			Sfur009062	Peritrophin-48
			Sfur009063	Eukaryotic translation initiation factor 4 gamma 2
			Sfur009069	Putative uncharacterized protein
			Sfur009070	Putative uncharacterized protein
			Sfur009085	Nuclear pore complex protein Nup50
			Sfur009105	Cytosol aminopeptidase
			Sfur009114	Arylsulfatase B
			Sfur009115	Intraflagellar transport protein 140 homolog
			Sfur009119	Serine--tRNA ligase, cytoplasmic
			Sfur009121	Protein nessun dorma
			Sfur009134	Putative uncharacterized protein
			Sfur009143	Polypeptide N-acetylgalactosaminyltransferase 35A
			Sfur009159	Putative uncharacterized protein
			Sfur009168	Putative uncharacterized protein
			Sfur009180	Protein FAM136A
			Sfur009184	Probable signal peptidase complex subunit 2
			Sfur009189	Autophagy-related protein 9A
			Sfur009196	Protein O-mannosyltransferase 1
			Sfur009198	60S ribosomal protein L35
			Sfur009201	LINE-1 retrotransposable element ORF2 protein
			Sfur009204	Clavesin-2
			Sfur009205	Uroporphyrinogen-III synthase
			Sfur009207	Putative uncharacterized protein
			Sfur009218	Transforming growth factor-beta-induced protein ig-h3
			Sfur009221	SET and MYND domain-containing protein 4
			Sfur009223	Armadillo repeat-containing protein 6 homolog
			Sfur009226	Putative uncharacterized protein
			Sfur009235	Testis-expressed protein 264
			Sfur009250	SH3 and multiple ankyrin repeat domains protein 3
			Sfur009252	Putative uncharacterized protein
			Sfur009255	Signal recognition particle 9 kDa protein
			Sfur009256	Proteasome subunit alpha type-7
			Sfur009270	Probable G-protein coupled receptor 158
			Sfur009272	Alpha-tocopherol transfer protein-like
			Sfur009284	Chitin deacetylase 1
			Sfur009307	Actin-binding Rho-activating protein
			Sfur009313	DNA (cytosine-5)-methyltransferase PliMCI
			Sfur009332	Coatomer subunit beta'
			Sfur009374	Cyclic nucleotide-gated cation channel beta-1
			Sfur009383	Calcium channel flower
			Sfur009384	Sodium-coupled monocarboxylate transporter 2
			Sfur009385	Protein commissureless 2 homolog
			Sfur009390	Putative uncharacterized protein
			Sfur009397	SCO-spondin
			Sfur009399	Ubiquitin-conjugating enzyme E2Q-like protein CG4502
			Sfur009405	Venom dipeptidyl peptidase 4
			Sfur009431	PITH domain-containing protein GA19395
			Sfur009433	Putative uncharacterized protein
			Sfur009434	Trypsin beta
			Sfur009446	Profilin
			Sfur009447	Uricase
			Sfur009448	Putative uncharacterized protein
			Sfur009450	Transcriptional regulator ovo
			Sfur009453	-
			Sfur009454	ER membrane protein complex subunit 4
			Sfur009455	Putative uncharacterized protein
			Sfur009466	Alpha-methylacyl-CoA racemase
			Sfur009479	Putative uncharacterized protein
			Sfur009485	Alpha-tocopherol transfer protein
			Sfur009493	Proteasome subunit beta type-6
			Sfur009496	Serine/threonine-protein kinase PLK4
			Sfur009500	Putative uncharacterized protein
			Sfur009516	V-type proton ATPase 21 kDa proteolipid subunit
			Sfur009521	Putative uncharacterized protein
			Sfur009529	Aquaporin AQPcic
			Sfur009533	Regulator of chromosome condensation
			Sfur009553	Breast cancer anti-estrogen resistance protein 3 homolog
			Sfur009558	GDP-fucose protein O-fucosyltransferase 2
			Sfur009562	Mediator of RNA polymerase II transcription subunit 11
			Sfur009564	Methylosome subunit pICln
			Sfur009568	Coatomer subunit alpha
			Sfur009575	RNA pseudouridylate synthase domain-containing protein 2
			Sfur009577	SH3 and multiple ankyrin repeat domains protein 3
			Sfur009593	Putative uncharacterized protein
			Sfur009600	Nostrin
			Sfur009613	cAMP-dependent protein kinase catalytic subunit 3
			Sfur009619	Putative uncharacterized protein
			Sfur009643	Putative uncharacterized protein
			Sfur009664	Putative uncharacterized protein
			Sfur009688	Tubulin glycylase 3A
			Sfur009691	DNA polymerase delta catalytic subunit
			Sfur009702	Jerky protein homolog-like
			Sfur009703	Sodium-coupled monocarboxylate transporter 2
			Sfur009706	Putative uncharacterized protein
			Sfur009710	Luciferin sulfotransferase
			Sfur009733	Putative uncharacterized protein
			Sfur009737	Ubiquitin-conjugating enzyme E2 L5
			Sfur009741	mRNA cap guanine-N7 methyltransferase
			Sfur009743	Ribosomal protein S6 kinase alpha-5
			Sfur009744	Zinc finger E-box-binding homeobox 2
			Sfur009752	Baculoviral IAP repeat-containing protein 5
			Sfur009753	Protein escargot
			Sfur009756	Chitin deacetylase 1
			Sfur009770	Putative uncharacterized protein
			Sfur009780	Spermine oxidase
			Sfur009790	Neutral alpha-glucosidase AB
			Sfur009794	Putative defense protein 1
			Sfur009796	3-oxoacyl-[acyl-carrier-protein] reductase FabG
			Sfur009804	WD repeat and HMG-box DNA-binding protein 1
			Sfur009805	Chitin deacetylase 1
			Sfur009806	Putative uncharacterized protein
			Sfur009812	Limbic system-associated membrane protein
			Sfur009822	Putative uncharacterized protein
			Sfur009829	Dedicator of cytokinesis protein 11
			Sfur009841	Aquaporin
			Sfur009864	Alpha-tocopherol transfer protein
			Sfur009865	Probable cytochrome P450 49a1
			Sfur009868	Putative uncharacterized protein
			Sfur009881	Putative uncharacterized protein
			Sfur009882	Putative uncharacterized protein
			Sfur009889	Septin-2
			Sfur009909	Respirasome Complex Assembly Factor 1
			Sfur009910	Trypsin-3 (Fragment)
			Sfur009918	Putative uncharacterized protein
			Sfur009930	Putative uncharacterized protein
			Sfur009946	Ribosome biogenesis protein BMS1 homolog
			Sfur009964	Uncharacterized protein K02A2.6
			Sfur009965	Inositol 1,4,5-trisphosphate receptor
			Sfur009969	Lipopolysaccharide-induced tumor necrosis factor-alpha factor
			Sfur009976	Putative uncharacterized protein
			Sfur009985	ABC transporter G family member 23
			Sfur009994	Catalase
			Sfur009996	CUB and sushi domain-containing protein 3
			Sfur009998	Staphylococcal nuclease domain-containing protein 1
			Sfur010000	Putative uncharacterized protein
			Sfur010021	NEDD8-activating enzyme E1 regulatory subunit
			Sfur010024	Putative uncharacterized protein
			Sfur010027	N-acetylgalactosamine kinase
			Sfur010033	Flightin
			Sfur010039	Glycosyltransferase 25 family member
			Sfur010040	Diphthine methyltransferase
			Sfur010046	Carnitine O-palmitoyltransferase 1, muscle isoform
			Sfur010052	Charged multivesicular body protein 2b
			Sfur010065	Protein furry
			Sfur010066	Proton-coupled amino acid transporter-like protein pathetic
			Sfur010070	Lipase 1
			Sfur010080	NEDD8-activating enzyme E1 regulatory subunit
			Sfur010095	Apolipophorins
			Sfur010097	U1 small nuclear ribonucleoprotein A
			Sfur010098	Alpha-L-fucosidase
			Sfur010114	Myosin regulatory light chain sqh
			Sfur010127	Putative uncharacterized protein
			Sfur010129	Transmembrane protein 258
			Sfur010134	Juvenile hormone epoxide hydrolase 2
			Sfur010138	Mitochondrial carrier homolog 2
			Sfur010141	Transmembrane protein 208
[truncated: 817 more rows]

## Sheet: DE-vs-AE cis and trans
DE-vs-AE cis and trans target gene				DE-vs-AE trans target gene
id	Description			id	Description
Sfur002163	Protein borderless			MSTRG.10770	cuticle protein 19-like, partial [Nilaparvata lugens]
				MSTRG.12076	heat shock protein 70-5 [Laodelphax striatellus]
				MSTRG.12228	breast cancer type 1 susceptibility protein homolog [Nilaparvata lugens]
				MSTRG.13167	pyrokinin [Nilaparvata lugens]
				MSTRG.13565	nose resistant to fluoxetine protein 6-like isoform X1 [Nilaparvata lugens]
				MSTRG.15952	defensin [Sogatella furcifera]
				MSTRG.27057	reverse ribonuclease integrase [Lasius niger]
				MSTRG.28022	PI-actitoxin-Axm2b-like [Nilaparvata lugens]
				MSTRG.28836	-
				MSTRG.30965	ATP-dependent DNA helicase PIF1 [Araneus ventricosus]
				MSTRG.31097	dynamin-1-like protein [Nilaparvata lugens]
				MSTRG.36537	intraflagellar transport protein 27 homolog, partial [Nilaparvata lugens]
				MSTRG.37156	uncharacterized protein LOC111050532 [Nilaparvata lugens]
				MSTRG.8635	cuticle protein 19.8-like [Nilaparvata lugens]
				MSTRG.8636	cuticle protein 19.8-like [Nilaparvata lugens]
				Sfur000539	Putative uncharacterized protein
				Sfur001403	Nose resistant to fluoxetine protein 6
				Sfur002043	Putative uncharacterized protein
				Sfur002423	Cytochrome P450 4V2
				Sfur002924	Phenoloxidase-activating factor 2
				Sfur003501	Cytochrome P450 4V2
				Sfur003977	Protein takeout
				Sfur004915	Bardet-Biedl syndrome 4 protein
				Sfur004971	Zinc finger protein 423 homolog
				Sfur005135	Putative uncharacterized protein
				Sfur005166	Putative uncharacterized protein
				Sfur005942	Putative uncharacterized protein
				Sfur006006	Putative uncharacterized protein
				Sfur006302	Alpha-actinin, sarcomeric
				Sfur006579	Chimeric ERCC6-PGBD3 protein
				Sfur006630	Putative uncharacterized protein
				Sfur007641	Putative uncharacterized protein
				Sfur008084	Patronin
				Sfur008263	Cytochrome P450 4C1
				Sfur008477	Alpha-tocopherol transfer protein-like
				Sfur009253	Protein yellow
				Sfur010438	Uncharacterized protein K02A2.6
				Sfur010509	Hepatic leukemia factor
				Sfur011724	BTB/POZ domain-containing protein 3
				Sfur011918	Putative uncharacterized protein
				Sfur013047	Uncharacterized protein K02A2.6
				Sfur013419	Putative uncharacterized protein
				Sfur013740	Pyrokinin-1 receptor
				Sfur013901	Centromere-associated protein E
				Sfur014522	Putative uncharacterized protein
				Sfur014878	Trafficking protein particle complex subunit 10
				Sfur014940	Putative uncharacterized protein
				Sfur015083	Putative uncharacterized protein
				Sfur015291	TBC1 domain family member 22B
				Sfur015320	Putative uncharacterized protein
				Sfur015368	Sodium-dependent proline transporter
