# Supplementary material for: Interaction Analysis of lncRNA and mRNA Based on the Full-Length Transcriptome of the Nymph-to-Adult Developmental Transition of Sogatella furcifera
Source: Insects. 2023 Mar 23;14(4):308. doi: 10.3390/insects14040308 (PMC10141146; doi:10.3390/insects14040308)
Supplement: Supplementary file 1 [file insects-14-00308-s001.zip › Table S8. GO enrichment analysis of target gene..xlsx]

## Sheet: PE-VS-DE  cis GO
cis-diff.C
GO ID	Description	cis_diff (61)	All (9162)	pvalue	p.adjust	Genes
GO:0034045	pre-autophagosomal structure membrane	3	9	2.2929e-05	0.00509024	Sfur005841(RB1CC1);Sfur008091(RB1CC1);Sfur013517(ATG16L1)
GO:1990316	ATG1/ULK1 kinase complex	2	3	0.000130257	0.0144585	Sfur005841(RB1CC1);Sfur008091(RB1CC1)
GO:0000407	pre-autophagosomal structure	3	21	0.000342937	0.0253773	Sfur005841(RB1CC1);Sfur008091(RB1CC1);Sfur013517(ATG16L1)
GO:0044326	dendritic spine neck	1	1	0.00665793	0.295612	Sfur002079(PPP1R9A)
GO:1990761	growth cone lamellipodium	1	1	0.00665793	0.295612	Sfur002079(PPP1R9A)
GO:0033391	chromatoid body	1	2	0.0132723	0.491074	Sfur010797(Arntl)
GO:0005677	chromatin silencing complex	1	3	0.0198433	0.5132	Sfur006024(BAHD1)
GO:0043190	ATP-binding cassette (ABC) transporter complex	1	4	0.0263712	0.5132	Sfur010345(abcG23)
GO:0044300	cerebellar mossy fiber	1	4	0.0263712	0.5132	Sfur006059(SLC17A7)
GO:0005576	extracellular region	12	1002	0.0305217	0.5132	Sfur000631(SPE);Sfur000838(SLC26A11);Sfur000881(Lip1);Sfur004160(TFPI);Sfur004871(--);Sfur005266(EbpIII);Sfur007299(--);Sfur008488(TFPI2);Sfur011205(MP1);Sfur011639(MP1);Sfur012506(APOD);Sfur012615(--)
GO:0005773	vacuole	6	360	0.0318876	0.5132	Sfur000028(GD10667);Sfur000424(CG17119);Sfur000838(SLC26A11);Sfur005841(RB1CC1);Sfur008091(RB1CC1);Sfur013517(ATG16L1)
GO:1902554	serine/threonine protein kinase complex	2	44	0.0344903	0.5132	Sfur005841(RB1CC1);Sfur008091(RB1CC1)
GO:1902911	protein kinase complex	2	46	0.0374183	0.5132	Sfur005841(RB1CC1);Sfur008091(RB1CC1)
GO:0005764	lysosome	5	282	0.039114	0.5132	Sfur000028(GD10667);Sfur000424(CG17119);Sfur000838(SLC26A11);Sfur005841(RB1CC1);Sfur008091(RB1CC1)
GO:0042765	GPI-anchor transamidase complex	1	6	0.0392991	0.5132	Sfur005629(Pigu)
GO:0055120	striated muscle dense body	1	6	0.0392991	0.5132	Sfur006939(F42H10.3)
GO:0071564	npBAF complex	1	6	0.0392991	0.5132	Sfur009576(SS18L1)
GO:0000323	lytic vacuole	5	292	0.0443485	0.546965	Sfur000028(GD10667);Sfur000424(CG17119);Sfur000838(SLC26A11);Sfur005841(RB1CC1);Sfur008091(RB1CC1)
GO:0016514	SWI/SNF complex	1	10	0.0646504	0.755389	Sfur009576(SS18L1)
GO:0098533	ATPase dependent transmembrane transport complex	1	13	0.0832309	0.822992	Sfur010345(abcG23)
GO:1904949	ATPase complex	1	14	0.0893434	0.822992	Sfur010345(abcG23)
GO:0000421	autophagosome membrane	1	15	0.0954158	0.822992	Sfur013517(ATG16L1)
GO:0090544	BAF-type complex	1	16	0.101448	0.822992	Sfur009576(SS18L1)
GO:0030992	intraciliary transport particle B	1	17	0.107441	0.822992	Sfur001170(IFT27)
GO:0012507	ER to Golgi transport vesicle membrane	1	20	0.125185	0.822992	Sfur009541(GF10347)
GO:0060076	excitatory synapse	2	94	0.129398	0.822992	Sfur002079(PPP1R9A);Sfur006059(SLC17A7)
GO:0033116	endoplasmic reticulum-Golgi intermediate compartment membrane	1	21	0.131022	0.822992	Sfur009541(GF10347)
GO:0030658	transport vesicle membrane	2	95	0.131639	0.822992	Sfur006059(SLC17A7);Sfur009541(GF10347)
GO:0034707	chloride channel complex	1	22	0.136821	0.822992	Sfur010100(BEST3)
GO:0044449	contractile fiber part	2	98	0.138414	0.822992	Sfur006939(F42H10.3);Sfur011490(ball)
GO:0031430	M band	1	23	0.142582	0.822992	Sfur011490(ball)
GO:0043292	contractile fiber	2	100	0.142974	0.822992	Sfur006939(F42H10.3);Sfur011490(ball)
GO:0005774	vacuolar membrane	3	202	0.151071	0.822992	Sfur000424(CG17119);Sfur000838(SLC26A11);Sfur013517(ATG16L1)
GO:0030864	cortical actin cytoskeleton	1	25	0.153991	0.822992	Sfur002079(PPP1R9A)
GO:0044444	cytoplasmic part	34	4444	0.15731	0.822992	MSTRG.14617(RANBP1);MSTRG.22969(--);MSTRG.29743(nas-13);Sfur000028(GD10667);Sfur000424(CG17119);Sfur000572(Pdia5);Sfur000712(PEX11G);Sfur000838(SLC26A11);Sfur001080(Ppig);Sfur001170(IFT27);Sfur002079(PPP1R9A);Sfur003398(MMAB);Sfur003483(Madm);Sfur003978(PUDP);Sfur005310(Ucp2);Sfur005629(Pigu);Sfur005767(ACAA2);Sfur005841(RB1CC1);Sfur006059(SLC17A7);Sfur006776(ASH1L);Sfur006937(LMJF_27_0420);Sfur0…
GO:0005779	integral component of peroxisomal membrane	1	26	0.159639	0.822992	Sfur000712(PEX11G)
GO:0030990	intraciliary transport particle	1	28	0.170824	0.822992	Sfur001170(IFT27)
GO:0031231	intrinsic component of peroxisomal membrane	1	28	0.170824	0.822992	Sfur000712(PEX11G)
GO:0031965	nuclear membrane	2	112	0.170953	0.822992	Sfur005841(RB1CC1);Sfur008091(RB1CC1)
GO:0031301	integral component of organelle membrane	3	215	0.171988	0.822992	Sfur000712(PEX11G);Sfur005629(Pigu);Sfur006059(SLC17A7)
GO:0030285	integral component of synaptic vesicle membrane	1	29	0.176361	0.822992	Sfur006059(SLC17A7)
GO:0005777	peroxisome	2	116	0.180479	0.822992	Sfur000712(PEX11G);Sfur009447(Uro)
GO:0044437	vacuolar part	3	221	0.181917	0.822992	Sfur000424(CG17119);Sfur000838(SLC26A11);Sfur013517(ATG16L1)
GO:0042579	microbody	2	117	0.182874	0.822992	Sfur000712(PEX11G);Sfur009447(Uro)
GO:0044432	endoplasmic reticulum part	6	576	0.183233	0.822992	Sfur000572(Pdia5);Sfur005629(Pigu);Sfur005841(RB1CC1);Sfur008091(RB1CC1);Sfur009541(GF10347);Sfur014600(CYP4C1)
GO:0005783	endoplasmic reticulum	8	830	0.184125	0.822992	Sfur000572(Pdia5);Sfur000838(SLC26A11);Sfur005629(Pigu);Sfur005841(RB1CC1);Sfur008091(RB1CC1);Sfur009541(GF10347);Sfur012506(APOD);Sfur014600(CYP4C1)
GO:0030134	ER to Golgi transport vesicle	1	31	0.187327	0.822992	Sfur009541(GF10347)
GO:0031300	intrinsic component of organelle membrane	3	225	0.188622	0.822992	Sfur000712(PEX11G);Sfur005629(Pigu);Sfur006059(SLC17A7)
GO:0019898	extrinsic component of membrane	2	121	0.1925	0.822992	Sfur005841(RB1CC1);Sfur008091(RB1CC1)
GO:0030863	cortical cytoskeleton	1	33	0.19815	0.822992	Sfur002079(PPP1R9A)
GO:0031672	A band	1	34	0.203508	0.822992	Sfur011490(ball)
GO:0098588	bounding membrane of organelle	11	1265	0.214114	0.822992	Sfur000424(CG17119);Sfur000712(PEX11G);Sfur000838(SLC26A11);Sfur001170(IFT27);Sfur005629(Pigu);Sfur005841(RB1CC1);Sfur006059(SLC17A7);Sfur008091(RB1CC1);Sfur009541(GF10347);Sfur013517(ATG16L1);Sfur014600(CYP4C1)
GO:0036126	sperm flagellum	1	38	0.22459	0.822992	Sfur001170(IFT27)
GO:0005759	mitochondrial matrix	3	248	0.228332	0.822992	Sfur003398(MMAB);Sfur005767(ACAA2);Sfur012973(Mipep)
GO:0048786	presynaptic active zone	1	39	0.229774	0.822992	Sfur006059(SLC17A7)
GO:0005776	autophagosome	1	42	0.245123	0.822992	Sfur013517(ATG16L1)
GO:0005923	bicellular tight junction	1	42	0.245123	0.822992	Sfur006776(ASH1L)
GO:0031224	intrinsic component of membrane	19	2430	0.245909	0.822992	MSTRG.14666(Stt3a);Sfur000424(CG17119);Sfur000712(PEX11G);Sfur000838(SLC26A11);Sfur001481(Oacyl);Sfur002163(bdl);Sfur002387(SLC17A5);Sfur005310(Ucp2);Sfur005629(Pigu);Sfur006059(SLC17A7);Sfur007675(Gpr161);Sfur008722(PTK7);Sfur009541(GF10347);Sfur010100(BEST3);Sfur010345(abcG23);Sfur010546(--);Sfur011940(DppIII);Sfur012962(Tret1);Sfur013239(FAAH2)
GO:0016363	nuclear matrix	1	43	0.250172	0.822992	Sfur001080(Ppig)
GO:0030175	filopodium	1	43	0.250172	0.822992	Sfur002079(PPP1R9A)
GO:0005789	endoplasmic reticulum membrane	5	513	0.255056	0.822992	Sfur005629(Pigu);Sfur005841(RB1CC1);Sfur008091(RB1CC1);Sfur009541(GF10347);Sfur014600(CYP4C1)
GO:0005765	lysosomal membrane	2	147	0.256293	0.822992	Sfur000424(CG17119);Sfur000838(SLC26A11)
GO:0016605	PML body	1	45	0.26017	0.822992	Sfur010797(Arntl)
GO:0043197	dendritic spine	1	45	0.26017	0.822992	Sfur002079(PPP1R9A)
GO:0098852	lytic vacuole membrane	2	149	0.261246	0.822992	Sfur000424(CG17119);Sfur000838(SLC26A11)
GO:0016021	integral component of membrane	18	2315	0.263856	0.822992	Sfur000424(CG17119);Sfur000712(PEX11G);Sfur000838(SLC26A11);Sfur001481(Oacyl);Sfur002163(bdl);Sfur002387(SLC17A5);Sfur005310(Ucp2);Sfur005629(Pigu);Sfur006059(SLC17A7);Sfur007675(Gpr161);Sfur008722(PTK7);Sfur009541(GF10347);Sfur010100(BEST3);Sfur010345(abcG23);Sfur010546(--);Sfur011940(DppIII);Sfur012962(Tret1);Sfur013239(FAAH2)
GO:0005811	lipid particle	1	46	0.265121	0.822992	Sfur013239(FAAH2)
GO:0005778	peroxisomal membrane	1	47	0.270038	0.822992	Sfur000712(PEX11G)
GO:0031903	microbody membrane	1	47	0.270038	0.822992	Sfur000712(PEX11G)
GO:0042175	nuclear outer membrane-endoplasmic reticulum membrane network	5	525	0.270413	0.822992	Sfur005629(Pigu);Sfur005841(RB1CC1);Sfur008091(RB1CC1);Sfur009541(GF10347);Sfur014600(CYP4C1)
GO:1902495	transmembrane transporter complex	2	156	0.278591	0.822992	Sfur010100(BEST3);Sfur010345(abcG23)
GO:0044309	neuron spine	1	50	0.284597	0.822992	Sfur002079(PPP1R9A)
GO:1990351	transporter complex	2	159	0.286021	0.822992	Sfur010100(BEST3);Sfur010345(abcG23)
GO:0022626	cytosolic ribosome	1	52	0.294144	0.822992	Sfur012506(APOD)
GO:0005793	endoplasmic reticulum-Golgi intermediate compartment	1	55	0.30823	0.822992	Sfur009541(GF10347)
GO:0034399	nuclear periphery	1	55	0.30823	0.822992	Sfur001080(Ppig)
GO:0005911	cell-cell junction	2	169	0.310732	0.822992	Sfur006776(ASH1L);Sfur008722(PTK7)
GO:0005788	endoplasmic reticulum lumen	1	56	0.312863	0.822992	Sfur000572(Pdia5)
GO:0030018	Z disc	1	56	0.312863	0.822992	Sfur011490(ball)
GO:0030027	lamellipodium	1	56	0.312863	0.822992	Sfur002079(PPP1R9A)
GO:0030672	synaptic vesicle membrane	1	56	0.312863	0.822992	Sfur006059(SLC17A7)
GO:0031594	neuromuscular junction	1	56	0.312863	0.822992	Sfur002079(PPP1R9A)
GO:0097223	sperm part	1	56	0.312863	0.822992	Sfur001170(IFT27)
GO:0099501	exocytic vesicle membrane	1	56	0.312863	0.822992	Sfur006059(SLC17A7)
GO:0070603	SWI/SNF superfamily-type complex	1	60	0.331094	0.822992	Sfur009576(SS18L1)
GO:0031674	I band	1	61	0.335577	0.822992	Sfur011490(ball)
GO:0044438	microbody part	1	61	0.335577	0.822992	Sfur000712(PEX11G)
GO:0044439	peroxisomal part	1	61	0.335577	0.822992	Sfur000712(PEX11G)
GO:0005635	nuclear envelope	2	182	0.342606	0.822992	Sfur005841(RB1CC1);Sfur008091(RB1CC1)
GO:0005615	extracellular space	3	311	0.342769	0.822992	Sfur004871(--);Sfur007299(--);Sfur012506(APOD)
GO:0030662	coated vesicle membrane	1	63	0.344455	0.822992	Sfur009541(GF10347)
GO:0061695	transferase complex, transferring phosphorus-containing groups	2	183	0.345042	0.822992	Sfur005841(RB1CC1);Sfur008091(RB1CC1)
GO:0044425	membrane part	22	3020	0.347008	0.822992	MSTRG.14666(Stt3a);Sfur000424(CG17119);Sfur000712(PEX11G);Sfur000838(SLC26A11);Sfur001481(Oacyl);Sfur002163(bdl);Sfur002387(SLC17A5);Sfur005310(Ucp2);Sfur005629(Pigu);Sfur005841(RB1CC1);Sfur006059(SLC17A7);Sfur007675(Gpr161);Sfur008091(RB1CC1);Sfur008722(PTK7);Sfur009541(GF10347);Sfur010100(BEST3);Sfur010345(abcG23);Sfur010546(--);Sfur011940(DppIII);Sfur012962(Tret1);Sfur013239(FAAH2);Sfur014600(…
GO:0030426	growth cone	1	65	0.353215	0.822992	Sfur002079(PPP1R9A)
GO:0030133	transport vesicle	2	188	0.357177	0.822992	Sfur006059(SLC17A7);Sfur009541(GF10347)
GO:0031090	organelle membrane	13	1726	0.359058	0.822992	MSTRG.14666(Stt3a);Sfur000424(CG17119);Sfur000712(PEX11G);Sfur000838(SLC26A11);Sfur001170(IFT27);Sfur005310(Ucp2);Sfur005629(Pigu);Sfur005841(RB1CC1);Sfur006059(SLC17A7);Sfur008091(RB1CC1);Sfur009541(GF10347);Sfur013517(ATG16L1);Sfur014600(CYP4C1)
GO:0005938	cell cortex	2	189	0.359595	0.822992	Sfur002079(PPP1R9A);Sfur003483(Madm)
GO:0030427	site of polarized growth	1	71	0.378812	0.858125	Sfur002079(PPP1R9A)
GO:0030054	cell junction	3	335	0.386734	0.865846	Sfur006776(ASH1L);Sfur006939(F42H10.3);Sfur008722(PTK7)
GO:0070062	extracellular exosome	2	207	0.40253	0.865846	Sfur000838(SLC26A11);Sfur012506(APOD)
GO:0005829	cytosol	12	1634	0.40429	0.865846	Sfur001080(Ppig);Sfur002079(PPP1R9A);Sfur003483(Madm);Sfur003978(PUDP);Sfur005841(RB1CC1);Sfur006937(LMJF_27_0420);Sfur008091(RB1CC1);Sfur008868(ATOX1);Sfur011940(DppIII);Sfur012506(APOD);Sfur013517(ATG16L1);Sfur014923(Rabgap1)
GO:0065010	extracellular membrane-bounded organelle	2	212	0.414231	0.865846	Sfur000838(SLC26A11);Sfur012506(APOD)
GO:0005930	axoneme	1	80	0.41535	0.865846	Sfur013517(ATG16L1)
GO:0070160	occluding junction	1	80	0.41535	0.865846	Sfur006776(ASH1L)
GO:1903561	extracellular vesicle	2	213	0.416558	0.865846	Sfur000838(SLC26A11);Sfur012506(APOD)
GO:0043230	extracellular organelle	2	217	0.425822	0.865846	Sfur000838(SLC26A11);Sfur012506(APOD)
GO:0005925	focal adhesion	1	83	0.427052	0.865846	Sfur006939(F42H10.3)
GO:0097014	ciliary plasm	1	83	0.427052	0.865846	Sfur013517(ATG16L1)
GO:0014069	postsynaptic density	1	85	0.434726	0.865846	Sfur002079(PPP1R9A)
GO:0099572	postsynaptic specialization	1	85	0.434726	0.865846	Sfur002079(PPP1R9A)
GO:0098794	postsynapse	2	222	0.437298	0.865846	Sfur002079(PPP1R9A);Sfur006059(SLC17A7)
GO:0043296	apical junction complex	1	88	0.446047	0.865846	Sfur006776(ASH1L)
GO:0099568	cytoplasmic region	2	226	0.446392	0.865846	Sfur002079(PPP1R9A);Sfur003483(Madm)
GO:0030176	integral component of endoplasmic reticulum membrane	1	90	0.453471	0.865846	Sfur005629(Pigu)
GO:0098805	whole membrane	8	1102	0.45459	0.865846	Sfur000424(CG17119);Sfur000712(PEX11G);Sfur000838(SLC26A11);Sfur005841(RB1CC1);Sfur006059(SLC17A7);Sfur008091(RB1CC1);Sfur009541(GF10347);Sfur013517(ATG16L1)
GO:0044448	cell cortex part	1	91	0.457145	0.865846	Sfur002079(PPP1R9A)
GO:0030017	sarcomere	1	92	0.460796	0.865846	Sfur011490(ball)
GO:0031514	motile cilium	1	92	0.460796	0.865846	Sfur001170(IFT27)
GO:0012505	endomembrane system	13	1852	0.465854	0.865846	MSTRG.14617(RANBP1);Sfur000572(Pdia5);Sfur000838(SLC26A11);Sfur001170(IFT27);Sfur003483(Madm);Sfur005629(Pigu);Sfur005841(RB1CC1);Sfur006059(SLC17A7);Sfur006776(ASH1L);Sfur008091(RB1CC1);Sfur009541(GF10347);Sfur012506(APOD);Sfur014600(CYP4C1)
GO:0030016	myofibril	1	94	0.468025	0.865846	Sfur011490(ball)
GO:0030659	cytoplasmic vesicle membrane	2	239	0.475389	0.86872	Sfur006059(SLC17A7);Sfur009541(GF10347)
GO:0031227	intrinsic component of endoplasmic reticulum membrane	1	97	0.47869	0.86872	Sfur005629(Pigu)
GO:0044445	cytosolic part	1	99	0.485682	0.86872	Sfur012506(APOD)
GO:0043025	neuronal cell body	2	245	0.488471	0.86872	Sfur002079(PPP1R9A);Sfur012506(APOD)
GO:0098858	actin-based cell projection	1	100	0.489144	0.86872	Sfur002079(PPP1R9A)
GO:0012506	vesicle membrane	2	251	0.501355	0.883339	Sfur006059(SLC17A7);Sfur009541(GF10347)
GO:0005924	cell-substrate adherens junction	1	108	0.516025	0.893654	Sfur006939(F42H10.3)
GO:0030055	cell-substrate junction	1	109	0.519286	0.893654	Sfur006939(F42H10.3)
GO:0036464	cytoplasmic ribonucleoprotein granule	1	109	0.519286	0.893654	Sfur010797(Arntl)
GO:0044421	extracellular region part	4	568	0.528422	0.902382	Sfur000838(SLC26A11);Sfur004871(--);Sfur007299(--);Sfur012506(APOD)
GO:0005887	integral component of plasma membrane	4	571	0.532666	0.902686	Sfur000838(SLC26A11);Sfur002163(bdl);Sfur007675(Gpr161);Sfur010546(--)
GO:0008021	synaptic vesicle	1	115	0.538401	0.90526	Sfur006059(SLC17A7)
GO:0030425	dendrite	2	274	0.548824	0.90526	Sfur002079(PPP1R9A);Sfur012506(APOD)
GO:0044433	cytoplasmic vesicle part	2	275	0.550817	0.90526	Sfur006059(SLC17A7);Sfur009541(GF10347)
GO:0031226	intrinsic component of plasma membrane	4	588	0.556376	0.90526	Sfur000838(SLC26A11);Sfur002163(bdl);Sfur007675(Gpr161);Sfur010546(--)
GO:0035770	ribonucleoprotein granule	1	121	0.556768	0.90526	Sfur010797(Arntl)
GO:0044297	cell body	2	281	0.562649	0.90526	Sfur002079(PPP1R9A);Sfur012506(APOD)
GO:0070382	exocytic vesicle	1	123	0.562729	0.90526	Sfur006059(SLC17A7)
GO:0030135	coated vesicle	1	128	0.577289	0.922002	Sfur009541(GF10347)
GO:0034702	ion channel complex	1	134	0.594133	0.942125	Sfur010100(BEST3)
GO:0044429	mitochondrial part	4	629	0.610932	0.961115	Sfur003398(MMAB);Sfur005310(Ucp2);Sfur005767(ACAA2);Sfur012973(Mipep)
GO:0043005	neuron projection	4	632	0.614767	0.961115	Sfur002079(PPP1R9A);Sfur002163(bdl);Sfur006059(SLC17A7);Sfur012506(APOD)
GO:0030424	axon	2	314	0.623799	0.961498	Sfur002163(bdl);Sfur006059(SLC17A7)
GO:0005667	transcription factor complex	1	147	0.628395	0.961498	Sfur010797(Arntl)
GO:0005929	cilium	2	319	0.632482	0.961498	Sfur001170(IFT27);Sfur013517(ATG16L1)
GO:0031252	cell leading edge	1	150	0.635889	0.961498	Sfur002079(PPP1R9A)
GO:0031982	vesicle	5	810	0.636667	0.961498	MSTRG.29743(nas-13);Sfur000838(SLC26A11);Sfur006059(SLC17A7);Sfur009541(GF10347);Sfur012506(APOD)
GO:0005840	ribosome	1	174	0.690719	1	Sfur012506(APOD)
GO:0016607	nuclear speck	1	174	0.690719	1	Sfur001080(Ppig)
GO:0098796	membrane protein complex	3	529	0.692413	1	Sfur005629(Pigu);Sfur010100(BEST3);Sfur010345(abcG23)
GO:0015629	actin cytoskeleton	1	177	0.696975	1	Sfur002079(PPP1R9A)
GO:0005794	Golgi apparatus	4	704	0.699838	1	Sfur000838(SLC26A11);Sfur001170(IFT27);Sfur003483(Madm);Sfur006776(ASH1L)
GO:0005912	adherens junction	1	179	0.701075	1	Sfur006939(F42H10.3)
GO:0005815	microtubule organizing center	2	364	0.703827	1	MSTRG.14617(RANBP1);Sfur014923(Rabgap1)
GO:0070161	anchoring junction	1	181	0.705122	1	Sfur006939(F42H10.3)
GO:0031988	membrane-bounded vesicle	4	713	0.7095	1	Sfur000838(SLC26A11);Sfur006059(SLC17A7);Sfur009541(GF10347);Sfur012506(APOD)
GO:0016604	nuclear body	2	370	0.712438	1	Sfur001080(Ppig);Sfur010797(Arntl)
GO:0044430	cytoskeletal part	4	717	0.713724	1	MSTRG.14617(RANBP1);MSTRG.16085(Mapre3);Sfur002079(PPP1R9A);Sfur014923(Rabgap1)
GO:0005819	spindle	1	192	0.726431	1	MSTRG.16085(Mapre3)
GO:0031410	cytoplasmic vesicle	3	561	0.730512	1	MSTRG.29743(nas-13);Sfur006059(SLC17A7);Sfur009541(GF10347)
GO:0098797	plasma membrane protein complex	1	195	0.731975	1	Sfur010345(abcG23)
GO:0036477	somatodendritic compartment	2	387	0.735726	1	Sfur002079(PPP1R9A);Sfur012506(APOD)
GO:0044441	ciliary part	1	200	0.74097	1	Sfur013517(ATG16L1)
GO:1902494	catalytic complex	4	748	0.744991	1	Sfur005629(Pigu);Sfur005841(RB1CC1);Sfur008091(RB1CC1);Sfur010345(abcG23)
GO:0044422	organelle part	29	4666	0.745149	1	MSTRG.14617(RANBP1);MSTRG.14666(Stt3a);MSTRG.16085(Mapre3);Sfur000424(CG17119);Sfur000572(Pdia5);Sfur000712(PEX11G);Sfur000838(SLC26A11);Sfur001080(Ppig);Sfur001170(IFT27);Sfur002079(PPP1R9A);Sfur003398(MMAB);Sfur005310(Ucp2);Sfur005629(Pigu);Sfur005767(ACAA2);Sfur005841(RB1CC1);Sfur006024(BAHD1);Sfur006059(SLC17A7);Sfur006776(ASH1L);Sfur006939(F42H10.3);Sfur008091(RB1CC1);Sfur009541(GF10347);Sfu…
GO:0099503	secretory vesicle	1	211	0.759728	1	Sfur006059(SLC17A7)
GO:0042995	cell projection	6	1122	0.773929	1	Sfur001170(IFT27);Sfur002079(PPP1R9A);Sfur002163(bdl);Sfur006059(SLC17A7);Sfur012506(APOD);Sfur013517(ATG16L1)
GO:0044456	synapse part	2	423	0.779878	1	Sfur002079(PPP1R9A);Sfur006059(SLC17A7)
GO:0005874	microtubule	1	224	0.780179	1	MSTRG.16085(Mapre3)
GO:0005737	cytoplasm	35	5635	0.788143	1	MSTRG.14617(RANBP1);MSTRG.22969(--);MSTRG.29743(nas-13);Sfur000028(GD10667);Sfur000424(CG17119);Sfur000572(Pdia5);Sfur000712(PEX11G);Sfur000838(SLC26A11);Sfur001080(Ppig);Sfur001170(IFT27);Sfur002079(PPP1R9A);Sfur003398(MMAB);Sfur003483(Madm);Sfur003978(PUDP);Sfur005310(Ucp2);Sfur005629(Pigu);Sfur005767(ACAA2);Sfur005841(RB1CC1);Sfur006059(SLC17A7);Sfur006776(ASH1L);Sfur006937(LMJF_27_0420);Sfur0…
GO:0015630	microtubule cytoskeleton	3	619	0.790235	1	MSTRG.14617(RANBP1);MSTRG.16085(Mapre3);Sfur014923(Rabgap1)
GO:0031967	organelle envelope	3	622	0.793011	1	Sfur005310(Ucp2);Sfur005841(RB1CC1);Sfur008091(RB1CC1)
GO:0031975	envelope	3	623	0.793929	1	Sfur005310(Ucp2);Sfur005841(RB1CC1);Sfur008091(RB1CC1)
GO:0016020	membrane	24	4009	0.795149	1	MSTRG.14666(Stt3a);Sfur000424(CG17119);Sfur000712(PEX11G);Sfur000838(SLC26A11);Sfur001170(IFT27);Sfur001481(Oacyl);Sfur002163(bdl);Sfur002387(SLC17A5);Sfur005310(Ucp2);Sfur005629(Pigu);Sfur005841(RB1CC1);Sfur006059(SLC17A7);Sfur007675(Gpr161);Sfur008091(RB1CC1);Sfur008722(PTK7);Sfur009541(GF10347);Sfur010100(BEST3);Sfur010345(abcG23);Sfur010546(--);Sfur011940(DppIII);Sfur012962(Tret1);Sfur013239(…
GO:0098793	presynapse	1	249	0.81481	1	Sfur006059(SLC17A7)
GO:0099513	polymeric cytoskeletal fiber	1	259	0.827107	1	MSTRG.16085(Mapre3)
GO:0099512	supramolecular fiber	1	260	0.828292	1	MSTRG.16085(Mapre3)
GO:0044446	intracellular organelle part	27	4536	0.829095	1	MSTRG.14617(RANBP1);MSTRG.16085(Mapre3);Sfur000424(CG17119);Sfur000572(Pdia5);Sfur000712(PEX11G);Sfur000838(SLC26A11);Sfur001080(Ppig);Sfur001170(IFT27);Sfur002079(PPP1R9A);Sfur003398(MMAB);Sfur005310(Ucp2);Sfur005629(Pigu);Sfur005767(ACAA2);Sfur005841(RB1CC1);Sfur006024(BAHD1);Sfur006059(SLC17A7);Sfur006776(ASH1L);Sfur008091(RB1CC1);Sfur009541(GF10347);Sfur009576(SS18L1);Sfur009957(Upp1);Sfur010…
GO:0048471	perinuclear region of cytoplasm	1	261	0.829469	1	Sfur012506(APOD)
GO:0097458	neuron part	4	868	0.842398	1	Sfur002079(PPP1R9A);Sfur002163(bdl);Sfur006059(SLC17A7);Sfur012506(APOD)
GO:0044459	plasma membrane part	5	1050	0.843432	1	Sfur000838(SLC26A11);Sfur002163(bdl);Sfur007675(Gpr161);Sfur010345(abcG23);Sfur010546(--)
GO:0016023	cytoplasmic, membrane-bounded vesicle	2	491	0.84619	1	Sfur006059(SLC17A7);Sfur009541(GF10347)
GO:0044463	cell projection part	2	505	0.857409	1	Sfur002079(PPP1R9A);Sfur013517(ATG16L1)
GO:0005743	mitochondrial inner membrane	1	288	0.858405	1	Sfur005310(Ucp2)
GO:0071944	cell periphery	11	2110	0.861941	1	Sfur000838(SLC26A11);Sfur002079(PPP1R9A);Sfur002163(bdl);Sfur003483(Madm);Sfur005629(Pigu);Sfur007675(Gpr161);Sfur010100(BEST3);Sfur010345(abcG23);Sfur010546(--);Sfur011940(DppIII);Sfur012962(Tret1)
GO:1990234	transferase complex	2	517	0.866436	1	Sfur005841(RB1CC1);Sfur008091(RB1CC1)
GO:0019866	organelle inner membrane	1	315	0.882497	1	Sfur005310(Ucp2)
GO:0005694	chromosome	3	749	0.885606	1	Sfur006024(BAHD1);Sfur006776(ASH1L);Sfur011490(ball)
GO:0005739	mitochondrion	4	952	0.890668	1	Sfur003398(MMAB);Sfur005310(Ucp2);Sfur005767(ACAA2);Sfur012973(Mipep)
GO:0005856	cytoskeleton	4	963	0.895949	1	MSTRG.14617(RANBP1);MSTRG.16085(Mapre3);Sfur002079(PPP1R9A);Sfur014923(Rabgap1)
GO:0000139	Golgi membrane	1	340	0.901185	1	Sfur001170(IFT27)
GO:0045202	synapse	2	582	0.906967	1	Sfur002079(PPP1R9A);Sfur006059(SLC17A7)
GO:0030529	intracellular ribonucleoprotein complex	2	583	0.907492	1	Sfur010797(Arntl);Sfur012506(APOD)
GO:0070013	intracellular organelle lumen	11	2247	0.912457	1	Sfur000572(Pdia5);Sfur000838(SLC26A11);Sfur001080(Ppig);Sfur003398(MMAB);Sfur005767(ACAA2);Sfur006024(BAHD1);Sfur006776(ASH1L);Sfur009957(Upp1);Sfur010797(Arntl);Sfur011490(ball);Sfur012973(Mipep)
GO:0043233	organelle lumen	11	2258	0.91577	1	Sfur000572(Pdia5);Sfur000838(SLC26A11);Sfur001080(Ppig);Sfur003398(MMAB);Sfur005767(ACAA2);Sfur006024(BAHD1);Sfur006776(ASH1L);Sfur009957(Upp1);Sfur010797(Arntl);Sfur011490(ball);Sfur012973(Mipep)
GO:0000785	chromatin	1	368	0.918657	1	Sfur011490(ball)
GO:1990904	ribonucleoprotein complex	2	617	0.923793	1	Sfur010797(Arntl);Sfur012506(APOD)
GO:0031974	membrane-enclosed lumen	11	2294	0.925912	1	Sfur000572(Pdia5);Sfur000838(SLC26A11);Sfur001080(Ppig);Sfur003398(MMAB);Sfur005767(ACAA2);Sfur006024(BAHD1);Sfur006776(ASH1L);Sfur009957(Upp1);Sfur010797(Arntl);Sfur011490(ball);Sfur012973(Mipep)
GO:0031966	mitochondrial membrane	1	406	0.937597	1	Sfur005310(Ucp2)
GO:0043228	non-membrane-bounded organelle	11	2345	0.938554	1	MSTRG.14617(RANBP1);MSTRG.16085(Mapre3);Sfur002079(PPP1R9A);Sfur006024(BAHD1);Sfur006776(ASH1L);Sfur006939(F42H10.3);Sfur010797(Arntl);Sfur011490(ball);Sfur012506(APOD);Sfur013239(FAAH2);Sfur014923(Rabgap1)
GO:0043232	intracellular non-membrane-bounded organelle	11	2345	0.938554	1	MSTRG.14617(RANBP1);MSTRG.16085(Mapre3);Sfur002079(PPP1R9A);Sfur006024(BAHD1);Sfur006776(ASH1L);Sfur006939(F42H10.3);Sfur010797(Arntl);Sfur011490(ball);Sfur012506(APOD);Sfur013239(FAAH2);Sfur014923(Rabgap1)
GO:0005730	nucleolus	1	411	0.939741	1	Sfur011490(ball)
GO:0005886	plasma membrane	9	2015	0.942161	1	Sfur000838(SLC26A11);Sfur002163(bdl);Sfur005629(Pigu);Sfur007675(Gpr161);Sfur010100(BEST3);Sfur010345(abcG23);Sfur010546(--);Sfur011940(DppIII);Sfur012962(Tret1)
GO:0044428	nuclear part	10	2191	0.942538	1	Sfur000838(SLC26A11);Sfur001080(Ppig);Sfur005841(RB1CC1);Sfur006024(BAHD1);Sfur006776(ASH1L);Sfur008091(RB1CC1);Sfur009576(SS18L1);Sfur009957(Upp1);Sfur010797(Arntl);Sfur011490(ball)
GO:0005740	mitochondrial envelope	1	431	0.947617	1	Sfur005310(Ucp2)
GO:0044451	nucleoplasm part	2	686	0.949029	1	Sfur001080(Ppig);Sfur010797(Arntl)
GO:0043229	intracellular organelle	38	6523	0.950832	1	MSTRG.14617(RANBP1);MSTRG.14666(Stt3a);MSTRG.16085(Mapre3);MSTRG.29743(nas-13);Sfur000028(GD10667);Sfur000424(CG17119);Sfur000572(Pdia5);Sfur000712(PEX11G);Sfur000838(SLC26A11);Sfur001080(Ppig);Sfur001170(IFT27);Sfur001639(RIBC2);Sfur002079(PPP1R9A);Sfur003398(MMAB);Sfur003483(Madm);Sfur005310(Ucp2);Sfur005629(Pigu);Sfur005767(ACAA2);Sfur005841(RB1CC1);Sfur006024(BAHD1);Sfur006059(SLC17A7);Sfur00…
GO:0005654	nucleoplasm	6	1514	0.951741	1	Sfur000838(SLC26A11);Sfur001080(Ppig);Sfur006024(BAHD1);Sfur006776(ASH1L);Sfur009957(Upp1);Sfur010797(Arntl)
GO:0044431	Golgi apparatus part	1	443	0.951846	1	Sfur001170(IFT27)
GO:0043226	organelle	38	6641	0.970327	1	MSTRG.14617(RANBP1);MSTRG.14666(Stt3a);MSTRG.16085(Mapre3);MSTRG.29743(nas-13);Sfur000028(GD10667);Sfur000424(CG17119);Sfur000572(Pdia5);Sfur000712(PEX11G);Sfur000838(SLC26A11);Sfur001080(Ppig);Sfur001170(IFT27);Sfur001639(RIBC2);Sfur002079(PPP1R9A);Sfur003398(MMAB);Sfur003483(Madm);Sfur005310(Ucp2);Sfur005629(Pigu);Sfur005767(ACAA2);Sfur005841(RB1CC1);Sfur006024(BAHD1);Sfur006059(SLC17A7);Sfur00…
GO:0043234	protein complex	9	2202	0.97348	1	Sfur001170(IFT27);Sfur005629(Pigu);Sfur005841(RB1CC1);Sfur006024(BAHD1);Sfur008091(RB1CC1);Sfur009576(SS18L1);Sfur010100(BEST3);Sfur010345(abcG23);Sfur010797(Arntl)
GO:0043231	intracellular membrane-bounded organelle	32	5873	0.977624	1	MSTRG.14617(RANBP1);MSTRG.14666(Stt3a);Sfur000028(GD10667);Sfur000424(CG17119);Sfur000572(Pdia5);Sfur000712(PEX11G);Sfur000838(SLC26A11);Sfur001080(Ppig);Sfur001170(IFT27);Sfur001639(RIBC2);Sfur003398(MMAB);Sfur003483(Madm);Sfur005310(Ucp2);Sfur005629(Pigu);Sfur005767(ACAA2);Sfur005841(RB1CC1);Sfur006024(BAHD1);Sfur006059(SLC17A7);Sfur006776(ASH1L);Sfur006937(LMJF_27_0420);Sfur008091(RB1CC1);Sfur…
GO:0031981	nuclear lumen	7	1937	0.98374	1	Sfur000838(SLC26A11);Sfur001080(Ppig);Sfur006024(BAHD1);Sfur006776(ASH1L);Sfur009957(Upp1);Sfur010797(Arntl);Sfur011490(ball)
GO:0044427	chromosomal part	1	614	0.985676	1	Sfur011490(ball)
GO:0043227	membrane-bounded organelle	32	5978	0.986087	1	MSTRG.14617(RANBP1);MSTRG.14666(Stt3a);Sfur000028(GD10667);Sfur000424(CG17119);Sfur000572(Pdia5);Sfur000712(PEX11G);Sfur000838(SLC26A11);Sfur001080(Ppig);Sfur001170(IFT27);Sfur001639(RIBC2);Sfur003398(MMAB);Sfur003483(Madm);Sfur005310(Ucp2);Sfur005629(Pigu);Sfur005767(ACAA2);Sfur005841(RB1CC1);Sfur006024(BAHD1);Sfur006059(SLC17A7);Sfur006776(ASH1L);Sfur006937(LMJF_27_0420);Sfur008091(RB1CC1);Sfur…
GO:0032991	macromolecular complex	12	3033	0.993277	1	Sfur000712(PEX11G);Sfur001170(IFT27);Sfur005629(Pigu);Sfur005841(RB1CC1);Sfur006024(BAHD1);Sfur008091(RB1CC1);Sfur009576(SS18L1);Sfur010100(BEST3);Sfur010345(abcG23);Sfur010797(Arntl);Sfur011490(ball);Sfur012506(APOD)
GO:0044424	intracellular part	42	7434	0.993397	1	MSTRG.14617(RANBP1);MSTRG.14666(Stt3a);MSTRG.16085(Mapre3);MSTRG.22969(--);MSTRG.29743(nas-13);Sfur000028(GD10667);Sfur000424(CG17119);Sfur000572(Pdia5);Sfur000712(PEX11G);Sfur000838(SLC26A11);Sfur001080(Ppig);Sfur001170(IFT27);Sfur001639(RIBC2);Sfur002079(PPP1R9A);Sfur003398(MMAB);Sfur003483(Madm);Sfur003978(PUDP);Sfur005310(Ucp2);Sfur005629(Pigu);Sfur005767(ACAA2);Sfur005841(RB1CC1);Sfur006024(…
GO:0005622	intracellular	42	7436	0.993484	1	MSTRG.14617(RANBP1);MSTRG.14666(Stt3a);MSTRG.16085(Mapre3);MSTRG.22969(--);MSTRG.29743(nas-13);Sfur000028(GD10667);Sfur000424(CG17119);Sfur000572(Pdia5);Sfur000712(PEX11G);Sfur000838(SLC26A11);Sfur001080(Ppig);Sfur001170(IFT27);Sfur001639(RIBC2);Sfur002079(PPP1R9A);Sfur003398(MMAB);Sfur003483(Madm);Sfur003978(PUDP);Sfur005310(Ucp2);Sfur005629(Pigu);Sfur005767(ACAA2);Sfur005841(RB1CC1);Sfur006024(…
GO:0005634	nucleus	13	3560	0.998942	1	Sfur000838(SLC26A11);Sfur001080(Ppig);Sfur001639(RIBC2);Sfur005841(RB1CC1);Sfur006024(BAHD1);Sfur006776(ASH1L);Sfur006937(LMJF_27_0420);Sfur008091(RB1CC1);Sfur009576(SS18L1);Sfur009957(Upp1);Sfur010797(Arntl);Sfur011490(ball);Sfur013880(ken)
GO:0044464	cell part	48	8408	0.999662	1	MSTRG.14617(RANBP1);MSTRG.14666(Stt3a);MSTRG.16085(Mapre3);MSTRG.22969(--);MSTRG.29743(nas-13);Sfur000028(GD10667);Sfur000424(CG17119);Sfur000572(Pdia5);Sfur000712(PEX11G);Sfur000838(SLC26A11);Sfur001080(Ppig);Sfur001170(IFT27);Sfur001639(RIBC2);Sfur002079(PPP1R9A);Sfur002163(bdl);Sfur003398(MMAB);Sfur003483(Madm);Sfur003978(PUDP);Sfur005310(Ucp2);Sfur005629(Pigu);Sfur005767(ACAA2);Sfur005841(RB1…
GO:0005623	cell	48	8409	0.999666	1	MSTRG.14617(RANBP1);MSTRG.14666(Stt3a);MSTRG.16085(Mapre3);MSTRG.22969(--);MSTRG.29743(nas-13);Sfur000028(GD10667);Sfur000424(CG17119);Sfur000572(Pdia5);Sfur000712(PEX11G);Sfur000838(SLC26A11);Sfur001080(Ppig);Sfur001170(IFT27);Sfur001639(RIBC2);Sfur002079(PPP1R9A);Sfur002163(bdl);Sfur003398(MMAB);Sfur003483(Madm);Sfur003978(PUDP);Sfur005310(Ucp2);Sfur005629(Pigu);Sfur005767(ACAA2);Sfur005841(RB1…
GO:0005575	cellular_component	61	9162	1	1	MSTRG.14617(RANBP1);MSTRG.14666(Stt3a);MSTRG.16085(Mapre3);MSTRG.22969(--);MSTRG.29743(nas-13);Sfur000028(GD10667);Sfur000424(CG17119);Sfur000572(Pdia5);Sfur000631(SPE);Sfur000712(PEX11G);Sfur000838(SLC26A11);Sfur000881(Lip1);Sfur001080(Ppig);Sfur001170(IFT27);Sfur001481(Oacyl);Sfur001639(RIBC2);Sfur002079(PPP1R9A);Sfur002163(bdl);Sfur002387(SLC17A5);Sfur003398(MMAB);Sfur003483(Madm);Sfur003978(P…
cis-diff.F
GO ID	Description	cis_diff (63)	All (8732)	pvalue	p.adjust	Genes
GO:0061134	peptidase regulator activity	4	55	0.000637074	0.19367	Sfur004160(TFPI);Sfur008488(TFPI2);Sfur011205(MP1);Sfur011639(MP1)
GO:0015103	inorganic anion transmembrane transporter activity	4	79	0.00246698	0.201097	Sfur000838(SLC26A11);Sfur002387(SLC17A5);Sfur006059(SLC17A7);Sfur010100(BEST3)
GO:0042302	structural constituent of cuticle	4	80	0.00258293	0.201097	MSTRG.32769(Ccp84Ab);MSTRG.32778(ACP21);Sfur014800(ACP21);Sfur015309(ACP21)
GO:0016504	peptidase activator activity	2	11	0.00270211	0.201097	Sfur011205(MP1);Sfur011639(MP1)
GO:0004747	ribokinase activity	1	1	0.00721484	0.201097	Sfur006937(LMJF_27_0420)
GO:0004846	urate oxidase activity	1	1	0.00721484	0.201097	Sfur009447(Uro)
GO:0004850	uridine phosphorylase activity	1	1	0.00721484	0.201097	Sfur009957(Upp1)
GO:0008817	cob(I)yrinic acid a,c-diamide adenosyltransferase activity	1	1	0.00721484	0.201097	Sfur003398(MMAB)
GO:0016663	oxidoreductase activity, acting on other nitrogenous compounds as donors, oxygen as acceptor	1	1	0.00721484	0.201097	Sfur009447(Uro)
GO:0017077	oxidative phosphorylation uncoupler activity	1	1	0.00721484	0.201097	Sfur005310(Ucp2)
GO:0015114	phosphate ion transmembrane transporter activity	2	18	0.00727653	0.201097	Sfur002387(SLC17A5);Sfur006059(SLC17A7)
GO:0004252	serine-type endopeptidase activity	4	114	0.00908586	0.230175	Sfur000631(SPE);Sfur004871(--);Sfur011205(MP1);Sfur011639(MP1)
GO:0005214	structural constituent of chitin-based cuticle	2	23	0.0117573	0.261333	MSTRG.32769(Ccp84Ab);MSTRG.32778(ACP21)
GO:0004068	aspartate 1-decarboxylase activity	1	2	0.0143785	0.261333	Sfur011355(gadl1)
GO:0004782	sulfinoalanine decarboxylase activity	1	2	0.0143785	0.261333	Sfur011355(gadl1)
GO:0004867	serine-type endopeptidase inhibitor activity	2	26	0.0148955	0.261333	Sfur004160(TFPI);Sfur008488(TFPI2)
GO:1901682	sulfur compound transmembrane transporter activity	2	26	0.0148955	0.261333	Sfur000424(CG17119);Sfur000838(SLC26A11)
GO:0008509	anion transmembrane transporter activity	5	210	0.0174419	0.261333	Sfur000424(CG17119);Sfur000838(SLC26A11);Sfur002387(SLC17A5);Sfur006059(SLC17A7);Sfur010100(BEST3)
GO:0008236	serine-type peptidase activity	4	141	0.0186083	0.261333	Sfur000631(SPE);Sfur004871(--);Sfur011205(MP1);Sfur011639(MP1)
GO:0017171	serine hydrolase activity	4	142	0.0190464	0.261333	Sfur000631(SPE);Sfur004871(--);Sfur011205(MP1);Sfur011639(MP1)
GO:0003948	N4-(beta-N-acetylglucosaminyl)-L-asparaginase activity	1	3	0.0214912	0.261333	Sfur000028(GD10667)
GO:0003986	acetyl-CoA hydrolase activity	1	3	0.0214912	0.261333	Sfur005767(ACAA2)
GO:0004576	oligosaccharyl transferase activity	1	3	0.0214912	0.261333	MSTRG.14666(Stt3a)
GO:0015319	sodium:inorganic phosphate symporter activity	1	3	0.0214912	0.261333	Sfur006059(SLC17A7)
GO:1990738	pseudouridine 5'-phosphatase activity	1	3	0.0214912	0.261333	Sfur003978(PUDP)
GO:0005254	chloride channel activity	2	35	0.0261637	0.267319	Sfur006059(SLC17A7);Sfur010100(BEST3)
GO:0003985	acetyl-CoA C-acetyltransferase activity	1	4	0.0285534	0.267319	Sfur005767(ACAA2)
GO:0004118	cGMP-stimulated cyclic-nucleotide phosphodiesterase activity	1	4	0.0285534	0.267319	Sfur010067(pde-5)
GO:0005436	sodium:phosphate symporter activity	1	4	0.0285534	0.267319	Sfur006059(SLC17A7)
GO:0016453	C-acetyltransferase activity	1	4	0.0285534	0.267319	Sfur005767(ACAA2)
GO:0016531	copper chaperone activity	1	4	0.0285534	0.267319	Sfur008868(ATOX1)
GO:0017064	fatty acid amide hydrolase activity	1	4	0.0285534	0.267319	Sfur013239(FAAH2)
GO:0005253	anion channel activity	2	37	0.0290182	0.267319	Sfur006059(SLC17A7);Sfur010100(BEST3)
GO:0004866	endopeptidase inhibitor activity	2	41	0.0350793	0.273271	Sfur004160(TFPI);Sfur008488(TFPI2)
GO:0008068	extracellular-glutamate-gated chloride channel activity	1	5	0.0355654	0.273271	Sfur006059(SLC17A7)
GO:0008157	protein phosphatase 1 binding	1	5	0.0355654	0.273271	Sfur002079(PPP1R9A)
GO:0015184	L-cystine transmembrane transporter activity	1	5	0.0355654	0.273271	Sfur000424(CG17119)
GO:0016290	palmitoyl-CoA hydrolase activity	1	5	0.0355654	0.273271	Sfur005767(ACAA2)
GO:0016530	metallochaperone activity	1	5	0.0355654	0.273271	Sfur008868(ATOX1)
GO:0030414	peptidase inhibitor activity	2	43	0.0382782	0.273271	Sfur004160(TFPI);Sfur008488(TFPI2)
GO:0061135	endopeptidase regulator activity	2	44	0.0399181	0.273271	Sfur004160(TFPI);Sfur008488(TFPI2)
GO:0031419	cobalamin binding	1	6	0.0425277	0.273271	Sfur003398(MMAB)
GO:0035184	histone threonine kinase activity	1	6	0.0425277	0.273271	Sfur011490(ball)
GO:0046975	histone methyltransferase activity (H3-K36 specific)	1	6	0.0425277	0.273271	Sfur006776(ASH1L)
GO:0047617	acyl-CoA hydrolase activity	1	6	0.0425277	0.273271	Sfur005767(ACAA2)
GO:0015108	chloride transmembrane transporter activity	2	46	0.0432766	0.273271	Sfur006059(SLC17A7);Sfur010100(BEST3)
GO:0015179	L-amino acid transmembrane transporter activity	2	46	0.0432766	0.273271	Sfur000424(CG17119);Sfur006059(SLC17A7)
GO:0016811	hydrolase activity, acting on carbon-nitrogen (but not peptide) bonds, in linear amides	2	48	0.0467368	0.273271	Sfur000028(GD10667);Sfur013239(FAAH2)
GO:0008047	enzyme activator activity	4	191	0.0486643	0.273271	MSTRG.14617(RANBP1);Sfur011205(MP1);Sfur011639(MP1);Sfur014923(Rabgap1)
GO:0000099	sulfur amino acid transmembrane transporter activity	1	7	0.0494404	0.273271	Sfur000424(CG17119)
GO:0003988	acetyl-CoA C-acyltransferase activity	1	7	0.0494404	0.273271	Sfur005767(ACAA2)
GO:0004937	alpha1-adrenergic receptor activity	1	7	0.0494404	0.273271	Sfur007675(Gpr161)
GO:0015037	peptide disulfide oxidoreductase activity	1	7	0.0494404	0.273271	Sfur000572(Pdia5)
GO:0042800	histone methyltransferase activity (H3-K4 specific)	1	7	0.0494404	0.273271	Sfur006776(ASH1L)
GO:0046974	histone methyltransferase activity (H3-K9 specific)	1	7	0.0494404	0.273271	Sfur006776(ASH1L)
GO:0030234	enzyme regulator activity	6	372	0.050814	0.275847	MSTRG.14617(RANBP1);Sfur004160(TFPI);Sfur008488(TFPI2);Sfur011205(MP1);Sfur011639(MP1);Sfur014923(Rabgap1)
GO:0004936	alpha-adrenergic receptor activity	1	8	0.0563041	0.290109	Sfur007675(Gpr161)
GO:0016289	CoA hydrolase activity	1	8	0.0563041	0.290109	Sfur005767(ACAA2)
GO:0016661	oxidoreductase activity, acting on other nitrogenous compounds as donors	1	8	0.0563041	0.290109	Sfur009447(Uro)
GO:0008233	peptidase activity	8	589	0.0599348	0.295202	MSTRG.29743(nas-13);Sfur000028(GD10667);Sfur000631(SPE);Sfur004871(--);Sfur011205(MP1);Sfur011639(MP1);Sfur011940(DppIII);Sfur012973(Mipep)
GO:0003756	protein disulfide isomerase activity	1	9	0.0631189	0.295202	Sfur000572(Pdia5)
GO:0004935	adrenergic receptor activity	1	9	0.0631189	0.295202	Sfur007675(Gpr161)
GO:0008271	secondary active sulfate transmembrane transporter activity	1	9	0.0631189	0.295202	Sfur000838(SLC26A11)
GO:0016864	intramolecular oxidoreductase activity, transposing S-S bonds	1	9	0.0631189	0.295202	Sfur000572(Pdia5)
GO:0047555	3',5'-cyclic-GMP phosphodiesterase activity	1	9	0.0631189	0.295202	Sfur010067(pde-5)
GO:0005215	transporter activity	10	815	0.0653764	0.301128	Sfur000424(CG17119);Sfur000838(SLC26A11);Sfur002387(SLC17A5);Sfur005310(Ucp2);Sfur006059(SLC17A7);Sfur010100(BEST3);Sfur010345(abcG23);Sfur010546(--);Sfur012506(APOD);Sfur012962(Tret1)
GO:0046906	tetrapyrrole binding	3	132	0.0696777	0.307901	Sfur000550(cyp-44A1);Sfur003398(MMAB);Sfur014600(CYP4C1)
GO:0005234	extracellular-glutamate-gated ion channel activity	1	10	0.0698854	0.307901	Sfur006059(SLC17A7)
GO:0035173	histone kinase activity	1	10	0.0698854	0.307901	Sfur011490(ball)
GO:0008239	dipeptidyl-peptidase activity	1	11	0.0766037	0.318962	Sfur011940(DppIII)
GO:0016018	cyclosporin A binding	1	11	0.0766037	0.318962	Sfur001080(Ppig)
GO:0016408	C-acyltransferase activity	1	11	0.0766037	0.318962	Sfur005767(ACAA2)
GO:0019901	protein kinase binding	4	223	0.0768281	0.318962	Sfur002079(PPP1R9A);Sfur005841(RB1CC1);Sfur008091(RB1CC1);Sfur011490(ball)
GO:0022857	transmembrane transporter activity	9	731	0.0776421	0.318962	Sfur000424(CG17119);Sfur000838(SLC26A11);Sfur002387(SLC17A5);Sfur005310(Ucp2);Sfur006059(SLC17A7);Sfur010100(BEST3);Sfur010345(abcG23);Sfur010546(--);Sfur012962(Tret1)
GO:0016810	hydrolase activity, acting on carbon-nitrogen (but not peptide) bonds	2	68	0.0862029	0.349409	Sfur000028(GD10667);Sfur013239(FAAH2)
GO:0015116	sulfate transmembrane transporter activity	1	13	0.0898974	0.35492	Sfur000838(SLC26A11)
GO:0070888	E-box binding	1	13	0.0898974	0.35492	Sfur010797(Arntl)
GO:0004114	3',5'-cyclic-nucleotide phosphodiesterase activity	1	14	0.0964734	0.360476	Sfur010067(pde-5)
GO:0005313	L-glutamate transmembrane transporter activity	1	14	0.0964734	0.360476	Sfur006059(SLC17A7)
GO:0015172	acidic amino acid transmembrane transporter activity	1	14	0.0964734	0.360476	Sfur006059(SLC17A7)
GO:0045309	protein phosphorylated amino acid binding	1	14	0.0964734	0.360476	MSTRG.22969(--)
GO:1902936	phosphatidylinositol bisphosphate binding	2	73	0.0972337	0.360476	MSTRG.32168(sestd1-a);Sfur008477(Ttpal)
GO:0004112	cyclic-nucleotide phosphodiesterase activity	1	15	0.103003	0.364103	Sfur010067(pde-5)
GO:0005326	neurotransmitter transporter activity	1	15	0.103003	0.364103	Sfur006059(SLC17A7)
GO:0016790	thiolester hydrolase activity	1	15	0.103003	0.364103	Sfur005767(ACAA2)
GO:0019200	carbohydrate kinase activity	1	15	0.103003	0.364103	Sfur006937(LMJF_27_0420)
GO:0022804	active transmembrane transporter activity	4	251	0.106926	0.373626	Sfur000838(SLC26A11);Sfur002387(SLC17A5);Sfur006059(SLC17A7);Sfur010345(abcG23)
GO:0015291	secondary active transmembrane transporter activity	3	160	0.108458	0.373973	Sfur000838(SLC26A11);Sfur002387(SLC17A5);Sfur006059(SLC17A7)
GO:0004771	sterol esterase activity	1	16	0.109486	0.373973	Sfur000881(Lip1)
GO:0070011	peptidase activity, acting on L-amino acid peptides	7	565	0.110974	0.374845	MSTRG.29743(nas-13);Sfur000631(SPE);Sfur004871(--);Sfur011205(MP1);Sfur011639(MP1);Sfur011940(DppIII);Sfur012973(Mipep)
GO:0019900	kinase binding	4	258	0.115189	0.384806	Sfur002079(PPP1R9A);Sfur005841(RB1CC1);Sfur008091(RB1CC1);Sfur011490(ball)
GO:0060090	binding, bridging	2	82	0.118014	0.389959	Sfur005841(RB1CC1);Sfur008091(RB1CC1)
GO:0015171	amino acid transmembrane transporter activity	2	83	0.120388	0.393528	Sfur000424(CG17119);Sfur006059(SLC17A7)
GO:0015301	anion:anion antiporter activity	1	18	0.122313	0.395566	Sfur000838(SLC26A11)
GO:0051015	actin filament binding	2	89	0.134877	0.422004	Sfur002079(PPP1R9A);Sfur006939(F42H10.3)
GO:0016763	transferase activity, transferring pentosyl groups	1	20	0.134959	0.422004	Sfur009957(Upp1)
GO:0051219	phosphoprotein binding	1	20	0.134959	0.422004	MSTRG.22969(--)
GO:0022892	substrate-specific transporter activity	8	709	0.136041	0.422004	Sfur000424(CG17119);Sfur000838(SLC26A11);Sfur002387(SLC17A5);Sfur006059(SLC17A7);Sfur010100(BEST3);Sfur010546(--);Sfur012506(APOD);Sfur012962(Tret1)
GO:0005231	excitatory extracellular ligand-gated ion channel activity	1	21	0.141214	0.424005	Sfur006059(SLC17A7)
GO:0070330	aromatase activity	1	21	0.141214	0.424005	Sfur014600(CYP4C1)
GO:0072349	modified amino acid transmembrane transporter activity	1	21	0.141214	0.424005	Sfur000424(CG17119)
GO:0015081	sodium ion transmembrane transporter activity	2	92	0.142265	0.424005	Sfur006059(SLC17A7);Sfur010546(--)
GO:0005310	dicarboxylic acid transmembrane transporter activity	1	22	0.147425	0.425906	Sfur006059(SLC17A7)
GO:0004497	monooxygenase activity	2	96	0.152247	0.425906	Sfur000550(cyp-44A1);Sfur014600(CYP4C1)
GO:0005507	copper ion binding	1	23	0.153592	0.425906	Sfur008868(ATOX1)
GO:0015036	disulfide oxidoreductase activity	1	23	0.153592	0.425906	Sfur000572(Pdia5)
GO:0018024	histone-lysine N-methyltransferase activity	1	23	0.153592	0.425906	Sfur006776(ASH1L)
GO:0016853	isomerase activity	2	97	0.154764	0.425906	Sfur000572(Pdia5);Sfur001080(Ppig)
GO:0051020	GTPase binding	3	190	0.157257	0.425906	MSTRG.14617(RANBP1);Sfur002079(PPP1R9A);Sfur013517(ATG16L1)
GO:0008144	drug binding	1	24	0.159715	0.425906	Sfur001080(Ppig)
GO:0016712	oxidoreductase activity, acting on paired donors, with incorporation or reduction of molecular oxygen, reduced flavin or flavoprotein as one donor, and incorporation of one atom of oxygen	1	24	0.159715	0.425906	Sfur014600(CYP4C1)
GO:0030374	ligand-dependent nuclear receptor transcription coactivator activity	1	24	0.159715	0.425906	Sfur009576(SS18L1)
GO:0098631	protein binding involved in cell adhesion	1	24	0.159715	0.425906	Sfur002163(bdl)
GO:0098632	protein binding involved in cell-cell adhesion	1	24	0.159715	0.425906	Sfur002163(bdl)
GO:0003755	peptidyl-prolyl cis-trans isomerase activity	1	25	0.165794	0.428612	Sfur001080(Ppig)
GO:0015280	ligand-gated sodium channel activity	1	25	0.165794	0.428612	Sfur010546(--)
GO:0015296	anion:cation symporter activity	1	25	0.165794	0.428612	Sfur006059(SLC17A7)
GO:0015293	symporter activity	2	102	0.16747	0.428612	Sfur002387(SLC17A5);Sfur006059(SLC17A7)
GO:0022891	substrate-specific transmembrane transporter activity	7	631	0.167779	0.428612	Sfur000424(CG17119);Sfur000838(SLC26A11);Sfur002387(SLC17A5);Sfur006059(SLC17A7);Sfur010100(BEST3);Sfur010546(--);Sfur012962(Tret1)
GO:0004175	endopeptidase activity	5	407	0.169255	0.42878	Sfur000631(SPE);Sfur004871(--);Sfur011205(MP1);Sfur011639(MP1);Sfur012973(Mipep)
GO:0016859	cis-trans isomerase activity	1	27	0.177823	0.439497	Sfur001080(Ppig)
GO:0016860	intramolecular oxidoreductase activity	1	27	0.177823	0.439497	Sfur000572(Pdia5)
GO:0042054	histone methyltransferase activity	1	27	0.177823	0.439497	Sfur006776(ASH1L)
GO:0098772	molecular function regulator	6	530	0.181701	0.44493	MSTRG.14617(RANBP1);Sfur004160(TFPI);Sfur008488(TFPI2);Sfur011205(MP1);Sfur011639(MP1);Sfur014923(Rabgap1)
GO:1901981	phosphatidylinositol phosphate binding	2	108	0.182948	0.44493	MSTRG.32168(sestd1-a);Sfur008477(Ttpal)
GO:0004857	enzyme inhibitor activity	2	109	0.185549	0.447001	Sfur004160(TFPI);Sfur008488(TFPI2)
GO:0008227	G-protein coupled amine receptor activity	1	29	0.189681	0.447001	Sfur007675(Gpr161)
GO:0016278	lysine N-methyltransferase activity	1	29	0.189681	0.447001	Sfur006776(ASH1L)
GO:0016279	protein-lysine N-methyltransferase activity	1	29	0.189681	0.447001	Sfur006776(ASH1L)
GO:0016831	carboxy-lyase activity	1	30	0.195547	0.453788	Sfur011355(gadl1)
GO:0044325	ion channel binding	1	30	0.195547	0.453788	Sfur002079(PPP1R9A)
GO:0015075	ion transmembrane transporter activity	6	544	0.197165	0.454017	Sfur000424(CG17119);Sfur000838(SLC26A11);Sfur002387(SLC17A5);Sfur006059(SLC17A7);Sfur010100(BEST3);Sfur010546(--)
GO:0046943	carboxylic acid transmembrane transporter activity	2	114	0.198633	0.454017	Sfur000424(CG17119);Sfur006059(SLC17A7)
GO:0005342	organic acid transmembrane transporter activity	2	115	0.201263	0.456598	Sfur000424(CG17119);Sfur006059(SLC17A7)
GO:0015276	ligand-gated ion channel activity	2	117	0.206538	0.461673	Sfur006059(SLC17A7);Sfur010546(--)
GO:0022834	ligand-gated channel activity	2	117	0.206538	0.461673	Sfur006059(SLC17A7);Sfur010546(--)
GO:0005506	iron ion binding	2	121	0.217133	0.478642	Sfur000550(cyp-44A1);Sfur014600(CYP4C1)
GO:0015485	cholesterol binding	1	34	0.218595	0.478642	Sfur012506(APOD)
GO:0015151	alpha-glucoside transmembrane transporter activity	1	35	0.224255	0.478642	Sfur012962(Tret1)
GO:0015574	trehalose transmembrane transporter activity	1	35	0.224255	0.478642	Sfur012962(Tret1)
GO:0042947	glucoside transmembrane transporter activity	1	35	0.224255	0.478642	Sfur012962(Tret1)
GO:0020037	heme binding	2	125	0.227778	0.478642	Sfur000550(cyp-44A1);Sfur014600(CYP4C1)
GO:0030695	GTPase regulator activity	2	125	0.227778	0.478642	MSTRG.14617(RANBP1);Sfur014923(Rabgap1)
GO:0015154	disaccharide transmembrane transporter activity	1	36	0.229874	0.478642	Sfur012962(Tret1)
GO:0015157	oligosaccharide transmembrane transporter activity	1	36	0.229874	0.478642	Sfur012962(Tret1)
GO:0099516	ion antiporter activity	1	36	0.229874	0.478642	Sfur000838(SLC26A11)
GO:0008081	phosphoric diester hydrolase activity	1	37	0.235454	0.486925	Sfur010067(pde-5)
GO:0070006	metalloaminopeptidase activity	1	39	0.246493	0.50631	Sfur011940(DppIII)
GO:0016765	transferase activity, transferring alkyl or aryl (other than methyl) groups	1	40	0.251954	0.510627	Sfur003398(MMAB)
GO:0032934	sterol binding	1	40	0.251954	0.510627	Sfur012506(APOD)
GO:0016705	oxidoreductase activity, acting on paired donors, with incorporation or reduction of molecular oxygen	2	136	0.257222	0.511388	Sfur000550(cyp-44A1);Sfur014600(CYP4C1)
GO:0005230	extracellular ligand-gated ion channel activity	1	41	0.257376	0.511388	Sfur006059(SLC17A7)
GO:0005272	sodium channel activity	1	41	0.257376	0.511388	Sfur010546(--)
GO:0005216	ion channel activity	3	246	0.261519	0.512054	Sfur006059(SLC17A7);Sfur010100(BEST3);Sfur010546(--)
GO:0016830	carbon-carbon lyase activity	1	42	0.262759	0.512054	Sfur011355(gadl1)
GO:0005198	structural molecule activity	4	361	0.262765	0.512054	MSTRG.32769(Ccp84Ab);MSTRG.32778(ACP21);Sfur014800(ACP21);Sfur015309(ACP21)
GO:0022838	substrate-specific channel activity	3	248	0.265436	0.513964	Sfur006059(SLC17A7);Sfur010100(BEST3);Sfur010546(--)
GO:0016667	oxidoreductase activity, acting on a sulfur group of donors	1	43	0.268104	0.515846	Sfur000572(Pdia5)
GO:0008237	metallopeptidase activity	2	142	0.273332	0.516254	Sfur011940(DppIII);Sfur012973(Mipep)
GO:0004806	triglyceride lipase activity	1	44	0.273411	0.516254	Sfur000881(Lip1)
GO:0005496	steroid binding	1	44	0.273411	0.516254	Sfur012506(APOD)
GO:0015294	solute:cation symporter activity	1	45	0.278679	0.516618	Sfur006059(SLC17A7)
GO:0019903	protein phosphatase binding	1	45	0.278679	0.516618	Sfur002079(PPP1R9A)
GO:0008514	organic anion transmembrane transporter activity	2	144	0.278702	0.516618	Sfur000424(CG17119);Sfur006059(SLC17A7)
GO:0060589	nucleoside-triphosphatase regulator activity	2	146	0.28407	0.519519	MSTRG.14617(RANBP1);Sfur014923(Rabgap1)
GO:0015267	channel activity	3	258	0.285125	0.519519	Sfur006059(SLC17A7);Sfur010100(BEST3);Sfur010546(--)
GO:0035091	phosphatidylinositol binding	2	147	0.286753	0.519519	MSTRG.32168(sestd1-a);Sfur008477(Ttpal)
GO:0022803	passive transmembrane transporter activity	3	259	0.287103	0.519519	Sfur006059(SLC17A7);Sfur010100(BEST3);Sfur010546(--)
GO:0008276	protein methyltransferase activity	1	48	0.294261	0.520089	Sfur006776(ASH1L)
GO:0015144	carbohydrate transmembrane transporter activity	1	48	0.294261	0.520089	Sfur012962(Tret1)
GO:0051119	sugar transmembrane transporter activity	1	48	0.294261	0.520089	Sfur012962(Tret1)
GO:1901476	carbohydrate transporter activity	1	48	0.294261	0.520089	Sfur012962(Tret1)
GO:0030170	pyridoxal phosphate binding	1	49	0.299381	0.52608	Sfur011355(gadl1)
GO:0015297	antiporter activity	1	50	0.304464	0.531938	Sfur000838(SLC26A11)
GO:0019842	vitamin binding	1	53	0.319498	0.555013	Sfur003398(MMAB)
GO:0016747	transferase activity, transferring acyl groups other than amino-acyl groups	2	160	0.321516	0.555346	Sfur001481(Oacyl);Sfur005767(ACAA2)
GO:0008170	N-methyltransferase activity	1	54	0.324437	0.557226	Sfur006776(ASH1L)
GO:0016757	transferase activity, transferring glycosyl groups	2	164	0.332145	0.567259	MSTRG.14666(Stt3a);Sfur009957(Upp1)
GO:0019902	phosphatase binding	1	56	0.334211	0.567599	Sfur002079(PPP1R9A)
GO:0016746	transferase activity, transferring acyl groups	2	172	0.353265	0.594778	Sfur001481(Oacyl);Sfur005767(ACAA2)
GO:0004177	aminopeptidase activity	1	61	0.358041	0.594778	Sfur011940(DppIII)
GO:0004222	metalloendopeptidase activity	1	61	0.358041	0.594778	Sfur012973(Mipep)
GO:0008235	metalloexopeptidase activity	1	61	0.358041	0.594778	Sfur011940(DppIII)
GO:0016773	phosphotransferase activity, alcohol group as acceptor	4	422	0.362975	0.599698	Sfur003483(Madm);Sfur006937(LMJF_27_0420);Sfur008722(PTK7);Sfur011490(ball)
GO:0016407	acetyltransferase activity	1	63	0.367336	0.603622	Sfur005767(ACAA2)
GO:0005319	lipid transporter activity	1	66	0.381031	0.62276	Sfur012506(APOD)
GO:0008022	protein C-terminus binding	1	68	0.389998	0.630635	Sfur002079(PPP1R9A)
GO:0043178	alcohol binding	1	68	0.389998	0.630635	Sfur012506(APOD)
GO:0004713	protein tyrosine kinase activity	1	70	0.398838	0.641517	Sfur008722(PTK7)
GO:0015077	monovalent inorganic cation transmembrane transporter activity	2	194	0.410081	0.65613	Sfur006059(SLC17A7);Sfur010546(--)
GO:0003779	actin binding	2	197	0.417654	0.664748	Sfur002079(PPP1R9A);Sfur006939(F42H10.3)
GO:1901505	carbohydrate derivative transporter activity	1	76	0.424607	0.672294	Sfur012962(Tret1)
GO:0022836	gated channel activity	2	202	0.430171	0.677574	Sfur006059(SLC17A7);Sfur010546(--)
GO:0016301	kinase activity	4	476	0.45206	0.695171	Sfur003483(Madm);Sfur006937(LMJF_27_0420);Sfur008722(PTK7);Sfur011490(ball)
GO:0016820	hydrolase activity, acting on acid anhydrides, catalyzing transmembrane movement of substances	1	83	0.453299	0.695171	Sfur010345(abcG23)
GO:0042626	ATPase activity, coupled to transmembrane movement of substances	1	83	0.453299	0.695171	Sfur010345(abcG23)
GO:0043492	ATPase activity, coupled to movement of substances	1	83	0.453299	0.695171	Sfur010345(abcG23)
GO:0042578	phosphoric ester hydrolase activity	2	213	0.457213	0.695171	Sfur003978(PUDP);Sfur010067(pde-5)
GO:0016298	lipase activity	1	84	0.457281	0.695171	Sfur000881(Lip1)
GO:0004672	protein kinase activity	3	346	0.45825	0.695171	Sfur003483(Madm);Sfur008722(PTK7);Sfur011490(ball)
GO:0019787	ubiquitin-like protein transferase activity	2	214	0.459636	0.695171	MSTRG.22969(--);Sfur013517(ATG16L1)
GO:0008289	lipid binding	3	348	0.462044	0.695354	MSTRG.32168(sestd1-a);Sfur008477(Ttpal);Sfur012506(APOD)
GO:0008757	S-adenosylmethionine-dependent methyltransferase activity	1	89	0.476768	0.704078	Sfur006776(ASH1L)
GO:0005543	phospholipid binding	2	222	0.4788	0.704078	MSTRG.32168(sestd1-a);Sfur008477(Ttpal)
GO:0046873	metal ion transmembrane transporter activity	2	222	0.4788	0.704078	Sfur006059(SLC17A7);Sfur010546(--)
GO:0015399	primary active transmembrane transporter activity	1	90	0.480582	0.704078	Sfur010345(abcG23)
GO:0015405	P-P-bond-hydrolysis-driven transmembrane transporter activity	1	90	0.480582	0.704078	Sfur010345(abcG23)
GO:0003824	catalytic activity	32	4341	0.481738	0.704078	MSTRG.14666(Stt3a);MSTRG.22969(--);MSTRG.29743(nas-13);Sfur000028(GD10667);Sfur000550(cyp-44A1);Sfur000572(Pdia5);Sfur000631(SPE);Sfur000881(Lip1);Sfur001080(Ppig);Sfur001170(IFT27);Sfur001481(Oacyl);Sfur003398(MMAB);Sfur003483(Madm);Sfur003978(PUDP);Sfur004871(--);Sfur005767(ACAA2);Sfur006776(ASH1L);Sfur006937(LMJF_27_0420);Sfur008722(PTK7);Sfur009447(Uro);Sfur009957(Upp1);Sfur010067(pde-5);Sfur…
GO:0019899	enzyme binding	6	781	0.499408	0.726411	MSTRG.14617(RANBP1);Sfur002079(PPP1R9A);Sfur005841(RB1CC1);Sfur008091(RB1CC1);Sfur011490(ball);Sfur013517(ATG16L1)
GO:0016787	hydrolase activity	15	2033	0.509427	0.737456	MSTRG.29743(nas-13);Sfur000028(GD10667);Sfur000631(SPE);Sfur000881(Lip1);Sfur001170(IFT27);Sfur003978(PUDP);Sfur004871(--);Sfur005767(ACAA2);Sfur010067(pde-5);Sfur010345(abcG23);Sfur011205(MP1);Sfur011639(MP1);Sfur011940(DppIII);Sfur012973(Mipep);Sfur013239(FAAH2)
GO:0008238	exopeptidase activity	1	105	0.534613	0.770248	Sfur011940(DppIII)
GO:0003682	chromatin binding	2	252	0.546932	0.78428	Sfur006024(BAHD1);Sfur006776(ASH1L)
GO:0004674	protein serine/threonine kinase activity	2	255	0.553405	0.788975	Sfur003483(Madm);Sfur011490(ball)
GO:0042802	identical protein binding	5	684	0.555397	0.788975	Sfur002079(PPP1R9A);Sfur003483(Madm);Sfur006937(LMJF_27_0420);Sfur009957(Upp1);Sfur013517(ATG16L1)
GO:0005096	GTPase activator activity	1	116	0.570681	0.806917	Sfur014923(Rabgap1)
GO:0042277	peptide binding	1	119	0.580031	0.81634	Sfur001080(Ppig)
GO:0003713	transcription coactivator activity	1	120	0.583103	0.816882	Sfur009576(SS18L1)
GO:0099600	transmembrane receptor activity	3	418	0.586702	0.818153	Sfur006059(SLC17A7);Sfur007675(Gpr161);Sfur010546(--)
GO:0008168	methyltransferase activity	1	125	0.598134	0.830286	Sfur006776(ASH1L)
GO:0052689	carboxylic ester hydrolase activity	1	126	0.601075	0.830577	Sfur000881(Lip1)
GO:0046914	transition metal ion binding	5	723	0.60617	0.833827	MSTRG.22969(--);MSTRG.29743(nas-13);Sfur000550(cyp-44A1);Sfur008868(ATOX1);Sfur014600(CYP4C1)
GO:0022890	inorganic cation transmembrane transporter activity	2	283	0.610722	0.836304	Sfur006059(SLC17A7);Sfur010546(--)
GO:0016758	transferase activity, transferring hexosyl groups	1	132	0.618285	0.842864	MSTRG.14666(Stt3a)
GO:0016741	transferase activity, transferring one-carbon groups	1	134	0.623857	0.844648	Sfur006776(ASH1L)
GO:0008092	cytoskeletal protein binding	3	442	0.62515	0.844648	MSTRG.16085(Mapre3);Sfur002079(PPP1R9A);Sfur006939(F42H10.3)
GO:0016740	transferase activity	12	1753	0.630898	0.848641	MSTRG.14666(Stt3a);MSTRG.22969(--);Sfur001481(Oacyl);Sfur003398(MMAB);Sfur003483(Madm);Sfur005767(ACAA2);Sfur006776(ASH1L);Sfur006937(LMJF_27_0420);Sfur008722(PTK7);Sfur009957(Upp1);Sfur011490(ball);Sfur013517(ATG16L1)
GO:0016491	oxidoreductase activity	4	603	0.641289	0.85678	Sfur000550(cyp-44A1);Sfur000572(Pdia5);Sfur009447(Uro);Sfur014600(CYP4C1)
GO:0033218	amide binding	1	141	0.642737	0.85678	Sfur001080(Ppig)
GO:0046872	metal ion binding	17	2480	0.645404	0.85678	MSTRG.22969(--);MSTRG.29743(nas-13);Sfur000550(cyp-44A1);Sfur000631(SPE);Sfur003978(PUDP);Sfur006776(ASH1L);Sfur006937(LMJF_27_0420);Sfur006939(F42H10.3);Sfur008868(ATOX1);Sfur010067(pde-5);Sfur011205(MP1);Sfur011490(ball);Sfur011639(MP1);Sfur011940(DppIII);Sfur012973(Mipep);Sfur013880(ken);Sfur014600(CYP4C1)
GO:0003924	GTPase activity	1	148	0.660684	0.873252	Sfur001170(IFT27)
GO:0016829	lyase activity	1	153	0.672957	0.885623	Sfur011355(gadl1)
GO:0005261	cation channel activity	1	157	0.68246	0.894258	Sfur010546(--)
GO:0043169	cation binding	17	2536	0.686283	0.895408	MSTRG.22969(--);MSTRG.29743(nas-13);Sfur000550(cyp-44A1);Sfur000631(SPE);Sfur003978(PUDP);Sfur006776(ASH1L);Sfur006937(LMJF_27_0420);Sfur006939(F42H10.3);Sfur008868(ATOX1);Sfur010067(pde-5);Sfur011205(MP1);Sfur011490(ball);Sfur011639(MP1);Sfur011940(DppIII);Sfur012973(Mipep);Sfur013880(ken);Sfur014600(CYP4C1)
GO:0017016	Ras GTPase binding	1	167	0.705045	0.915955	MSTRG.14617(RANBP1)
GO:0008324	cation transmembrane transporter activity	2	346	0.719253	0.929992	Sfur006059(SLC17A7);Sfur010546(--)
GO:0016791	phosphatase activity	1	175	0.721967	0.929992	Sfur003978(PUDP)
GO:0031267	small GTPase binding	1	178	0.728064	0.933888	MSTRG.14617(RANBP1)
GO:0004872	receptor activity	3	522	0.735532	0.934723	Sfur006059(SLC17A7);Sfur007675(Gpr161);Sfur010546(--)
GO:0015631	tubulin binding	1	182	0.735989	0.934723	MSTRG.16085(Mapre3)
GO:0060089	molecular transducer activity	3	524	0.737939	0.934723	Sfur006059(SLC17A7);Sfur007675(Gpr161);Sfur010546(--)
GO:0042623	ATPase activity, coupled	1	188	0.747451	0.941429	Sfur010345(abcG23)
GO:0032403	protein complex binding	2	367	0.749427	0.941429	Sfur002079(PPP1R9A);Sfur006939(F42H10.3)
GO:0043167	ion binding	25	3781	0.75989	0.950644	MSTRG.22969(--);MSTRG.29743(nas-13);MSTRG.32168(sestd1-a);Sfur000550(cyp-44A1);Sfur000631(SPE);Sfur001170(IFT27);Sfur003398(MMAB);Sfur003483(Madm);Sfur003978(PUDP);Sfur006776(ASH1L);Sfur006937(LMJF_27_0420);Sfur006939(F42H10.3);Sfur008477(Ttpal);Sfur008722(PTK7);Sfur008868(ATOX1);Sfur010067(pde-5);Sfur010345(abcG23);Sfur011205(MP1);Sfur011355(gadl1);Sfur011490(ball);Sfur011639(MP1);Sfur011940(Dpp…
GO:0048037	cofactor binding	1	203	0.774008	0.964338	Sfur011355(gadl1)
GO:0005525	GTP binding	1	205	0.777334	0.964529	Sfur001170(IFT27)
GO:0004930	G-protein coupled receptor activity	1	209	0.783843	0.968652	Sfur007675(Gpr161)
GO:0019001	guanyl nucleotide binding	1	216	0.794787	0.974255	Sfur001170(IFT27)
GO:0032561	guanyl ribonucleotide binding	1	216	0.794787	0.974255	Sfur001170(IFT27)
GO:0016788	hydrolase activity, acting on ester bonds	4	748	0.799956	0.976653	Sfur000881(Lip1);Sfur003978(PUDP);Sfur005767(ACAA2);Sfur010067(pde-5)
GO:0044877	macromolecular complex binding	4	767	0.815955	0.985769	Sfur002079(PPP1R9A);Sfur006024(BAHD1);Sfur006776(ASH1L);Sfur006939(F42H10.3)
GO:0003712	transcription cofactor activity	1	231	0.816433	0.985769	Sfur009576(SS18L1)
GO:0000989	transcription factor activity, transcription factor binding	1	234	0.820485	0.985769	Sfur009576(SS18L1)
GO:0019904	protein domain specific binding	1	236	0.823137	0.985769	Sfur002079(PPP1R9A)
GO:0000988	transcription factor activity, protein binding	1	243	0.832119	0.985769	Sfur009576(SS18L1)
GO:0005524	ATP binding	6	1120	0.835483	0.985769	Sfur003398(MMAB);Sfur003483(Madm);Sfur006937(LMJF_27_0420);Sfur008722(PTK7);Sfur010345(abcG23);Sfur011490(ball)
GO:0032559	adenyl ribonucleotide binding	6	1136	0.845593	0.985769	Sfur003398(MMAB);Sfur003483(Madm);Sfur006937(LMJF_27_0420);Sfur008722(PTK7);Sfur010345(abcG23);Sfur011490(ball)
GO:0035639	purine ribonucleoside triphosphate binding	7	1297	0.846122	0.985769	Sfur001170(IFT27);Sfur003398(MMAB);Sfur003483(Madm);Sfur006937(LMJF_27_0420);Sfur008722(PTK7);Sfur010345(abcG23);Sfur011490(ball)
GO:0030554	adenyl nucleotide binding	6	1139	0.847434	0.985769	Sfur003398(MMAB);Sfur003483(Madm);Sfur006937(LMJF_27_0420);Sfur008722(PTK7);Sfur010345(abcG23);Sfur011490(ball)
GO:0043168	anion binding	10	1768	0.847915	0.985769	MSTRG.32168(sestd1-a);Sfur001170(IFT27);Sfur003398(MMAB);Sfur003483(Madm);Sfur006937(LMJF_27_0420);Sfur008477(Ttpal);Sfur008722(PTK7);Sfur010345(abcG23);Sfur011355(gadl1);Sfur011490(ball)
GO:0032555	purine ribonucleotide binding	7	1317	0.857472	0.985769	Sfur001170(IFT27);Sfur003398(MMAB);Sfur003483(Madm);Sfur006937(LMJF_27_0420);Sfur008722(PTK7);Sfur010345(abcG23);Sfur011490(ball)
GO:0000978	RNA polymerase II core promoter proximal region sequence-specific DNA binding	1	265	0.857524	0.985769	Sfur010797(Arntl)
GO:0017076	purine nucleotide binding	7	1321	0.859662	0.985769	Sfur001170(IFT27);Sfur003398(MMAB);Sfur003483(Madm);Sfur006937(LMJF_27_0420);Sfur008722(PTK7);Sfur010345(abcG23);Sfur011490(ball)
GO:0000987	core promoter proximal region sequence-specific DNA binding	1	270	0.862747	0.985769	Sfur010797(Arntl)
GO:0001159	core promoter proximal region DNA binding	1	270	0.862747	0.985769	Sfur010797(Arntl)
GO:0046983	protein dimerization activity	2	474	0.863795	0.985769	Sfur003483(Madm);Sfur010797(Arntl)
GO:0032553	ribonucleotide binding	7	1329	0.863963	0.985769	Sfur001170(IFT27);Sfur003398(MMAB);Sfur003483(Madm);Sfur006937(LMJF_27_0420);Sfur008722(PTK7);Sfur010345(abcG23);Sfur011490(ball)
GO:0042803	protein homodimerization activity	1	273	0.86579	0.985769	Sfur003483(Madm)
GO:0001883	purine nucleoside binding	7	1359	0.879172	0.988385	Sfur001170(IFT27);Sfur003398(MMAB);Sfur003483(Madm);Sfur006937(LMJF_27_0420);Sfur008722(PTK7);Sfur010345(abcG23);Sfur011490(ball)
GO:0032550	purine ribonucleoside binding	7	1359	0.879172	0.988385	Sfur001170(IFT27);Sfur003398(MMAB);Sfur003483(Madm);Sfur006937(LMJF_27_0420);Sfur008722(PTK7);Sfur010345(abcG23);Sfur011490(ball)
GO:0032549	ribonucleoside binding	7	1362	0.880616	0.988385	Sfur001170(IFT27);Sfur003398(MMAB);Sfur003483(Madm);Sfur006937(LMJF_27_0420);Sfur008722(PTK7);Sfur010345(abcG23);Sfur011490(ball)
GO:0001882	nucleoside binding	7	1363	0.881094	0.988385	Sfur001170(IFT27);Sfur003398(MMAB);Sfur003483(Madm);Sfur006937(LMJF_27_0420);Sfur008722(PTK7);Sfur010345(abcG23);Sfur011490(ball)
GO:0003700	transcription factor activity, sequence-specific DNA binding	2	505	0.886775	0.991101	Sfur010797(Arntl);Sfur013880(ken)
GO:0001071	nucleic acid binding transcription factor activity	2	511	0.890793	0.991435	Sfur010797(Arntl);Sfur013880(ken)
GO:0016887	ATPase activity	1	304	0.893596	0.991435	Sfur010345(abcG23)
GO:0016772	transferase activity, transferring phosphorus-containing groups	4	920	0.910542	0.998972	Sfur003483(Madm);Sfur006937(LMJF_27_0420);Sfur008722(PTK7);Sfur011490(ball)
GO:0005102	receptor binding	1	352	0.92585	0.998972	MSTRG.22969(--)
GO:0000166	nucleotide binding	7	1487	0.929426	0.998972	Sfur001170(IFT27);Sfur003398(MMAB);Sfur003483(Madm);Sfur006937(LMJF_27_0420);Sfur008722(PTK7);Sfur010345(abcG23);Sfur011490(ball)
GO:1901265	nucleoside phosphate binding	7	1487	0.929426	0.998972	Sfur001170(IFT27);Sfur003398(MMAB);Sfur003483(Madm);Sfur006937(LMJF_27_0420);Sfur008722(PTK7);Sfur010345(abcG23);Sfur011490(ball)
GO:0000977	RNA polymerase II regulatory region sequence-specific DNA binding	1	364	0.932274	0.998972	Sfur010797(Arntl)
GO:0001012	RNA polymerase II regulatory region DNA binding	1	364	0.932274	0.998972	Sfur010797(Arntl)
GO:0004888	transmembrane signaling receptor activity	1	367	0.933792	0.998972	Sfur007675(Gpr161)
GO:0097367	carbohydrate derivative binding	7	1538	0.943818	0.998972	Sfur001170(IFT27);Sfur003398(MMAB);Sfur003483(Madm);Sfur006937(LMJF_27_0420);Sfur008722(PTK7);Sfur010345(abcG23);Sfur011490(ball)
GO:0036094	small molecule binding	8	1713	0.945736	0.998972	Sfur001170(IFT27);Sfur003398(MMAB);Sfur003483(Madm);Sfur006937(LMJF_27_0420);Sfur008722(PTK7);Sfur010345(abcG23);Sfur011490(ball);Sfur012506(APOD)
GO:0017111	nucleoside-triphosphatase activity	2	641	0.951412	0.998972	Sfur001170(IFT27);Sfur010345(abcG23)
GO:0000976	transcription regulatory region sequence-specific DNA binding	1	419	0.955367	0.998972	Sfur010797(Arntl)
GO:0005515	protein binding	14	2716	0.955708	0.998972	MSTRG.14617(RANBP1);MSTRG.16085(Mapre3);MSTRG.22969(--);Sfur002079(PPP1R9A);Sfur002163(bdl);Sfur003483(Madm);Sfur005841(RB1CC1);Sfur006937(LMJF_27_0420);Sfur006939(F42H10.3);Sfur008091(RB1CC1);Sfur009957(Upp1);Sfur010797(Arntl);Sfur011490(ball);Sfur013517(ATG16L1)
GO:0044212	transcription regulatory region DNA binding	1	431	0.959264	0.998972	Sfur010797(Arntl)
GO:0000975	regulatory region DNA binding	1	434	0.960184	0.998972	Sfur010797(Arntl)
GO:0001067	regulatory region nucleic acid binding	1	438	0.96138	0.998972	Sfur010797(Arntl)
GO:0016462	pyrophosphatase activity	2	680	0.962234	0.998972	Sfur001170(IFT27);Sfur010345(abcG23)
GO:0016817	hydrolase activity, acting on acid anhydrides	2	682	0.962723	0.998972	Sfur001170(IFT27);Sfur010345(abcG23)
GO:0016818	hydrolase activity, acting on acid anhydrides, in phosphorus-containing anhydrides	2	682	0.962723	0.998972	Sfur001170(IFT27);Sfur010345(abcG23)
GO:0038023	signaling receptor activity	1	443	0.962825	0.998972	Sfur007675(Gpr161)
GO:1990837	sequence-specific double-stranded DNA binding	1	475	0.970891	1	Sfur010797(Arntl)
GO:0003690	double-stranded DNA binding	1	521	0.979555	1	Sfur010797(Arntl)
GO:0004871	signal transducer activity	1	521	0.979555	1	Sfur007675(Gpr161)
GO:0003723	RNA binding	2	877	0.989975	1	Sfur001080(Ppig);Sfur005767(ACAA2)
GO:0043565	sequence-specific DNA binding	1	662	0.993163	1	Sfur010797(Arntl)
GO:0005488	binding	39	6630	0.995811	1	MSTRG.14617(RANBP1);MSTRG.14666(Stt3a);MSTRG.16085(Mapre3);MSTRG.22969(--);MSTRG.29743(nas-13);MSTRG.32168(sestd1-a);Sfur000550(cyp-44A1);Sfur000631(SPE);Sfur001080(Ppig);Sfur001170(IFT27);Sfur002079(PPP1R9A);Sfur002163(bdl);Sfur003398(MMAB);Sfur003483(Madm);Sfur003978(PUDP);Sfur005767(ACAA2);Sfur005841(RB1CC1);Sfur006024(BAHD1);Sfur006776(ASH1L);Sfur006937(LMJF_27_0420);Sfur006939(F42H10.3);Sfur…
GO:0003677	DNA binding	3	1261	0.99645	1	Sfur006776(ASH1L);Sfur010797(Arntl);Sfur013880(ken)
GO:0097159	organic cyclic compound binding	16	3646	0.997803	1	Sfur000550(cyp-44A1);Sfur001080(Ppig);Sfur001170(IFT27);Sfur003398(MMAB);Sfur003483(Madm);Sfur005767(ACAA2);Sfur006776(ASH1L);Sfur006937(LMJF_27_0420);Sfur008722(PTK7);Sfur010345(abcG23);Sfur010797(Arntl);Sfur011355(gadl1);Sfur011490(ball);Sfur012506(APOD);Sfur013880(ken);Sfur014600(CYP4C1)
GO:1901363	heterocyclic compound binding	15	3608	0.998888	1	Sfur000550(cyp-44A1);Sfur001080(Ppig);Sfur001170(IFT27);Sfur003398(MMAB);Sfur003483(Madm);Sfur005767(ACAA2);Sfur006776(ASH1L);Sfur006937(LMJF_27_0420);Sfur008722(PTK7);Sfur010345(abcG23);Sfur010797(Arntl);Sfur011355(gadl1);Sfur011490(ball);Sfur013880(ken);Sfur014600(CYP4C1)
GO:0003676	nucleic acid binding	5	2241	0.999924	1	Sfur001080(Ppig);Sfur005767(ACAA2);Sfur006776(ASH1L);Sfur010797(Arntl);Sfur013880(ken)
GO:0003674	molecular_function	63	8732	1	1	MSTRG.14617(RANBP1);MSTRG.14666(Stt3a);MSTRG.16085(Mapre3);MSTRG.22969(--);MSTRG.29743(nas-13);MSTRG.32168(sestd1-a);MSTRG.32769(Ccp84Ab);MSTRG.32778(ACP21);Sfur000028(GD10667);Sfur000424(CG17119);Sfur000550(cyp-44A1);Sfur000572(Pdia5);Sfur000631(SPE);Sfur000838(SLC26A11);Sfur000881(Lip1);Sfur001080(Ppig);Sfur001170(IFT27);Sfur001481(Oacyl);Sfur002079(PPP1R9A);Sfur002163(bdl);Sfur002387(SLC17A5);…
cis-diff.P
GO ID	Description	cis_diff (57)	All (8939)	pvalue	p.adjust	Genes
GO:0016237	lysosomal microautophagy	2	4	0.000237747	0.112704	Sfur005841(RB1CC1);Sfur008091(RB1CC1)
GO:0034727	piecemeal microautophagy of nucleus	2	4	0.000237747	0.112704	Sfur005841(RB1CC1);Sfur008091(RB1CC1)
GO:0061709	reticulophagy	2	4	0.000237747	0.112704	Sfur005841(RB1CC1);Sfur008091(RB1CC1)
GO:0061723	glycophagy	2	5	0.00039462	0.112704	Sfur005841(RB1CC1);Sfur008091(RB1CC1)
GO:1902534	single-organism membrane invagination	2	5	0.00039462	0.112704	Sfur005841(RB1CC1);Sfur008091(RB1CC1)
GO:0030242	pexophagy	2	6	0.000589505	0.140302	Sfur005841(RB1CC1);Sfur008091(RB1CC1)
GO:0043097	pyrimidine nucleoside salvage	2	9	0.00139751	0.20972	Sfur003978(PUDP);Sfur009957(Upp1)
GO:0097150	neuronal stem cell population maintenance	2	9	0.00139751	0.20972	Sfur009576(SS18L1);Sfur011490(ball)
GO:0007031	peroxisome organization	3	37	0.00163792	0.20972	Sfur000712(PEX11G);Sfur005841(RB1CC1);Sfur008091(RB1CC1)
GO:0008655	pyrimidine-containing compound salvage	2	10	0.00173974	0.20972	Sfur003978(PUDP);Sfur009957(Upp1)
GO:0044804	nucleophagy	2	10	0.00173974	0.20972	Sfur005841(RB1CC1);Sfur008091(RB1CC1)
GO:0051051	negative regulation of transport	5	139	0.00185126	0.20972	Sfur002079(PPP1R9A);Sfur005310(Ucp2);Sfur005767(ACAA2);Sfur010100(BEST3);Sfur012506(APOD)
GO:0000045	autophagosome assembly	3	39	0.00190922	0.20972	Sfur005841(RB1CC1);Sfur008091(RB1CC1);Sfur013517(ATG16L1)
GO:0023057	negative regulation of signaling	9	465	0.00249626	0.240932	Sfur002079(PPP1R9A);Sfur005310(Ucp2);Sfur005767(ACAA2);Sfur005841(RB1CC1);Sfur006776(ASH1L);Sfur008091(RB1CC1);Sfur010067(pde-5);Sfur010797(Arntl);Sfur012506(APOD)
GO:0043174	nucleoside salvage	2	12	0.0025308	0.240932	Sfur003978(PUDP);Sfur009957(Upp1)
GO:0010648	negative regulation of cell communication	9	476	0.00292327	0.260902	Sfur002079(PPP1R9A);Sfur005310(Ucp2);Sfur005767(ACAA2);Sfur005841(RB1CC1);Sfur006776(ASH1L);Sfur008091(RB1CC1);Sfur010067(pde-5);Sfur010797(Arntl);Sfur012506(APOD)
GO:0001889	liver development	3	53	0.00459513	0.303524	Sfur005310(Ucp2);Sfur005841(RB1CC1);Sfur008091(RB1CC1)
GO:2001234	negative regulation of apoptotic signaling pathway	3	54	0.00484363	0.303524	Sfur005767(ACAA2);Sfur005841(RB1CC1);Sfur008091(RB1CC1)
GO:0061008	hepaticobiliary system development	3	57	0.00563735	0.303524	Sfur005310(Ucp2);Sfur005841(RB1CC1);Sfur008091(RB1CC1)
GO:0046134	pyrimidine nucleoside biosynthetic process	2	19	0.00637209	0.303524	Sfur003978(PUDP);Sfur009957(Upp1)
GO:0002674	negative regulation of acute inflammatory response	1	1	0.00637655	0.303524	Sfur006776(ASH1L)
GO:0006218	uridine catabolic process	1	1	0.00637655	0.303524	Sfur009957(Upp1)
GO:0019303	D-ribose catabolic process	1	1	0.00637655	0.303524	Sfur006937(LMJF_27_0420)
GO:0039689	negative stranded viral RNA replication	1	1	0.00637655	0.303524	Sfur013517(ATG16L1)
GO:0044034	multi-organism biosynthetic process	1	1	0.00637655	0.303524	Sfur013517(ATG16L1)
GO:0046108	uridine metabolic process	1	1	0.00637655	0.303524	Sfur009957(Upp1)
GO:0090403	oxidative stress-induced premature senescence	1	1	0.00637655	0.303524	Sfur010797(Arntl)
GO:1900454	positive regulation of long term synaptic depression	1	1	0.00637655	0.303524	Sfur002079(PPP1R9A)
GO:1902109	negative regulation of mitochondrial membrane permeability involved in apoptotic process	1	1	0.00637655	0.303524	Sfur005767(ACAA2)
GO:1903709	uterine gland development	1	1	0.00637655	0.303524	Sfur006776(ASH1L)
GO:0007568	aging	5	190	0.00704749	0.314663	Sfur002079(PPP1R9A);Sfur005310(Ucp2);Sfur010067(pde-5);Sfur010797(Arntl);Sfur012506(APOD)
GO:0070542	response to fatty acid	2	20	0.00705127	0.314663	MSTRG.14617(RANBP1);Sfur005310(Ucp2)
GO:0090066	regulation of anatomical structure size	6	274	0.0076854	0.319542	Sfur000712(PEX11G);Sfur002079(PPP1R9A);Sfur003483(Madm);Sfur005841(RB1CC1);Sfur007675(Gpr161);Sfur008091(RB1CC1)
GO:2001237	negative regulation of extrinsic apoptotic signaling pathway	2	21	0.00776179	0.319542	Sfur005841(RB1CC1);Sfur008091(RB1CC1)
GO:0006979	response to oxidative stress	5	197	0.00818117	0.319542	Sfur005310(Ucp2);Sfur008868(ATOX1);Sfur010067(pde-5);Sfur010797(Arntl);Sfur012506(APOD)
GO:0006213	pyrimidine nucleoside metabolic process	2	22	0.00850323	0.319542	Sfur003978(PUDP);Sfur009957(Upp1)
GO:0043094	cellular metabolic compound salvage	2	22	0.00850323	0.319542	Sfur003978(PUDP);Sfur009957(Upp1)
GO:0045793	positive regulation of cell size	2	22	0.00850323	0.319542	Sfur005841(RB1CC1);Sfur008091(RB1CC1)
GO:0032535	regulation of cellular component size	5	204	0.00943636	0.340773	Sfur000712(PEX11G);Sfur002079(PPP1R9A);Sfur003483(Madm);Sfur005841(RB1CC1);Sfur008091(RB1CC1)
GO:0072348	sulfur compound transport	2	25	0.010909	0.340773	Sfur000424(CG17119);Sfur000838(SLC26A11)
GO:0006014	D-ribose metabolic process	1	2	0.0127132	0.340773	Sfur006937(LMJF_27_0420)
GO:0010446	response to alkaline pH	1	2	0.0127132	0.340773	Sfur010067(pde-5)
GO:0019628	urate catabolic process	1	2	0.0127132	0.340773	Sfur009447(Uro)
GO:0044375	regulation of peroxisome size	1	2	0.0127132	0.340773	Sfur000712(PEX11G)
GO:0046133	pyrimidine ribonucleoside catabolic process	1	2	0.0127132	0.340773	Sfur009957(Upp1)
GO:0060361	flight	1	2	0.0127132	0.340773	Sfur011490(ball)
GO:0090400	stress-induced premature senescence	1	2	0.0127132	0.340773	Sfur010797(Arntl)
GO:0097676	histone H3-K36 dimethylation	1	2	0.0127132	0.340773	Sfur006776(ASH1L)
GO:1900272	negative regulation of long-term synaptic potentiation	1	2	0.0127132	0.340773	Sfur002079(PPP1R9A)
GO:1901029	negative regulation of mitochondrial outer membrane permeabilization involved in apoptotic signaling pathway	1	2	0.0127132	0.340773	Sfur005767(ACAA2)
GO:1903699	tarsal gland development	1	2	0.0127132	0.340773	Sfur006776(ASH1L)
GO:1904048	regulation of spontaneous neurotransmitter secretion	1	2	0.0127132	0.340773	Sfur002079(PPP1R9A)
GO:1904049	negative regulation of spontaneous neurotransmitter secretion	1	2	0.0127132	0.340773	Sfur002079(PPP1R9A)
GO:0000302	response to reactive oxygen species	3	77	0.0128864	0.340773	Sfur005310(Ucp2);Sfur010067(pde-5);Sfur012506(APOD)
GO:0044706	multi-multicellular organism process	4	144	0.0131866	0.342373	Sfur005266(EbpIII);Sfur005310(Ucp2);Sfur006776(ASH1L);Sfur007299(--)
GO:0010324	membrane invagination	2	30	0.0154997	0.377033	Sfur005841(RB1CC1);Sfur008091(RB1CC1)
GO:0007338	single fertilization	2	31	0.0165015	0.377033	MSTRG.29743(nas-13);Sfur006776(ASH1L)
GO:0009968	negative regulation of signal transduction	7	419	0.0165192	0.377033	Sfur005767(ACAA2);Sfur005841(RB1CC1);Sfur006776(ASH1L);Sfur008091(RB1CC1);Sfur010067(pde-5);Sfur010797(Arntl);Sfur012506(APOD)
GO:0048585	negative regulation of response to stimulus	8	526	0.0176399	0.377033	Sfur005310(Ucp2);Sfur005767(ACAA2);Sfur005841(RB1CC1);Sfur006776(ASH1L);Sfur008091(RB1CC1);Sfur010067(pde-5);Sfur010797(Arntl);Sfur012506(APOD)
GO:0002673	regulation of acute inflammatory response	1	3	0.01901	0.377033	Sfur006776(ASH1L)
GO:0006878	cellular copper ion homeostasis	1	3	0.01901	0.377033	Sfur008868(ATOX1)
GO:0019323	pentose catabolic process	1	3	0.01901	0.377033	Sfur006937(LMJF_27_0420)
GO:0035795	negative regulation of mitochondrial membrane permeability	1	3	0.01901	0.377033	Sfur005767(ACAA2)
GO:0045496	male analia development	1	3	0.01901	0.377033	Sfur013880(ken)
GO:0045497	female analia development	1	3	0.01901	0.377033	Sfur013880(ken)
GO:0061038	uterus morphogenesis	1	3	0.01901	0.377033	Sfur006776(ASH1L)
GO:0061179	negative regulation of insulin secretion involved in cellular response to glucose stimulus	1	3	0.01901	0.377033	Sfur005310(Ucp2)
GO:0070072	vacuolar proton-transporting V-type ATPase complex assembly	1	3	0.01901	0.377033	Sfur009541(GF10347)
GO:1900452	regulation of long term synaptic depression	1	3	0.01901	0.377033	Sfur002079(PPP1R9A)
GO:1990845	adaptive thermogenesis	1	3	0.01901	0.377033	Sfur005310(Ucp2)
GO:2000074	regulation of type B pancreatic cell development	1	3	0.01901	0.377033	Sfur010797(Arntl)
GO:2001016	positive regulation of skeletal muscle cell differentiation	1	3	0.01901	0.377033	Sfur010797(Arntl)
GO:0072528	pyrimidine-containing compound biosynthetic process	2	34	0.0196675	0.384728	Sfur003978(PUDP);Sfur009957(Upp1)
GO:0031667	response to nutrient levels	5	251	0.0214428	0.386733	Sfur005310(Ucp2);Sfur005841(RB1CC1);Sfur007299(--);Sfur008091(RB1CC1);Sfur009957(Upp1)
GO:0007565	female pregnancy	2	36	0.0219082	0.386733	Sfur005310(Ucp2);Sfur006776(ASH1L)
GO:0015807	L-amino acid transport	2	37	0.0230665	0.386733	Sfur000424(CG17119);Sfur006059(SLC17A7)
GO:2001236	regulation of extrinsic apoptotic signaling pathway	2	37	0.0230665	0.386733	Sfur005841(RB1CC1);Sfur008091(RB1CC1)
GO:0007033	vacuole organization	3	99	0.0250525	0.386733	Sfur005841(RB1CC1);Sfur008091(RB1CC1);Sfur013517(ATG16L1)
GO:0009991	response to extracellular stimulus	5	262	0.0252542	0.386733	Sfur005310(Ucp2);Sfur005841(RB1CC1);Sfur007299(--);Sfur008091(RB1CC1);Sfur009957(Upp1)
GO:0006627	protein processing involved in protein targeting to mitochondrion	1	4	0.0252675	0.386733	Sfur012973(Mipep)
GO:0007487	analia development	1	4	0.0252675	0.386733	Sfur013880(ken)
GO:0010138	pyrimidine ribonucleotide salvage	1	4	0.0252675	0.386733	Sfur009957(Upp1)
GO:0010754	negative regulation of cGMP-mediated signaling	1	4	0.0252675	0.386733	Sfur010067(pde-5)
GO:0032262	pyrimidine nucleotide salvage	1	4	0.0252675	0.386733	Sfur009957(Upp1)
GO:0042137	sequestering of neurotransmitter	1	4	0.0252675	0.386733	Sfur006059(SLC17A7)
GO:0044206	UMP salvage	1	4	0.0252675	0.386733	Sfur009957(Upp1)
GO:0046415	urate metabolic process	1	4	0.0252675	0.386733	Sfur009447(Uro)
GO:0051775	response to redox state	1	4	0.0252675	0.386733	Sfur010797(Arntl)
GO:0070070	proton-transporting V-type ATPase complex assembly	1	4	0.0252675	0.386733	Sfur009541(GF10347)
GO:0097401	synaptic vesicle lumen acidification	1	4	0.0252675	0.386733	Sfur006059(SLC17A7)
GO:0000422	mitophagy	2	39	0.0254572	0.386733	Sfur005841(RB1CC1);Sfur008091(RB1CC1)
GO:0046330	positive regulation of JNK cascade	2	39	0.0254572	0.386733	Sfur005841(RB1CC1);Sfur008091(RB1CC1)
GO:0050728	negative regulation of inflammatory response	2	39	0.0254572	0.386733	Sfur006776(ASH1L);Sfur012506(APOD)
GO:0061726	mitochondrion disassembly	2	39	0.0254572	0.386733	Sfur005841(RB1CC1);Sfur008091(RB1CC1)
GO:2001233	regulation of apoptotic signaling pathway	3	101	0.0263826	0.396573	Sfur005767(ACAA2);Sfur005841(RB1CC1);Sfur008091(RB1CC1)
GO:0009566	fertilization	2	41	0.0279444	0.40572	MSTRG.29743(nas-13);Sfur006776(ASH1L)
GO:1903531	negative regulation of secretion by cell	2	41	0.0279444	0.40572	Sfur002079(PPP1R9A);Sfur005310(Ucp2)
GO:0044712	single-organism catabolic process	8	574	0.0281191	0.40572	Sfur000881(Lip1);Sfur005767(ACAA2);Sfur005841(RB1CC1);Sfur006937(LMJF_27_0420);Sfur008091(RB1CC1);Sfur009447(Uro);Sfur009957(Upp1);Sfur013239(FAAH2)
GO:0008361	regulation of cell size	3	104	0.028448	0.40572	Sfur003483(Madm);Sfur005841(RB1CC1);Sfur008091(RB1CC1)
GO:0042493	response to drug	3	104	0.028448	0.40572	MSTRG.14617(RANBP1);Sfur009576(SS18L1);Sfur012506(APOD)
GO:0003323	type B pancreatic cell development	1	5	0.0314857	0.40572	Sfur010797(Arntl)
GO:0015811	L-cystine transport	1	5	0.0314857	0.40572	Sfur000424(CG17119)
GO:0042065	glial cell growth	1	5	0.0314857	0.40572	Sfur002163(bdl)
GO:0046135	pyrimidine nucleoside catabolic process	1	5	0.0314857	0.40572	Sfur009957(Upp1)
GO:0046697	decidualization	1	5	0.0314857	0.40572	Sfur006776(ASH1L)
GO:0048643	positive regulation of skeletal muscle tissue development	1	5	0.0314857	0.40572	Sfur010797(Arntl)
GO:0048733	sebaceous gland development	1	5	0.0314857	0.40572	Sfur006776(ASH1L)
GO:0060292	long term synaptic depression	1	5	0.0314857	0.40572	Sfur002079(PPP1R9A)
GO:0032874	positive regulation of stress-activated MAPK cascade	2	44	0.0318501	0.40572	Sfur005841(RB1CC1);Sfur008091(RB1CC1)
GO:0050796	regulation of insulin secretion	2	44	0.0318501	0.40572	Sfur005310(Ucp2);Sfur010797(Arntl)
GO:0070304	positive regulation of stress-activated protein kinase signaling cascade	2	44	0.0318501	0.40572	Sfur005841(RB1CC1);Sfur008091(RB1CC1)
GO:0006865	amino acid transport	3	109	0.0320769	0.40572	MSTRG.32271(CG1139);Sfur000424(CG17119);Sfur006059(SLC17A7)
GO:0006839	mitochondrial transport	3	110	0.0328305	0.40572	Sfur005310(Ucp2);Sfur005767(ACAA2);Sfur012973(Mipep)
GO:0072527	pyrimidine-containing compound metabolic process	2	46	0.0345666	0.40572	Sfur003978(PUDP);Sfur009957(Upp1)
GO:0043408	regulation of MAPK cascade	4	194	0.0347974	0.40572	Sfur005841(RB1CC1);Sfur006776(ASH1L);Sfur007675(Gpr161);Sfur008091(RB1CC1)
GO:0051048	negative regulation of secretion	2	48	0.0373702	0.40572	Sfur002079(PPP1R9A);Sfur005310(Ucp2)
GO:0000101	sulfur amino acid transport	1	6	0.0376649	0.40572	Sfur000424(CG17119)
GO:0001993	regulation of systemic arterial blood pressure by norepinephrine-epinephrine	1	6	0.0376649	0.40572	Sfur007675(Gpr161)
GO:0001996	positive regulation of heart rate by epinephrine-norepinephrine	1	6	0.0376649	0.40572	Sfur007675(Gpr161)
GO:0002068	glandular epithelial cell development	1	6	0.0376649	0.40572	Sfur010797(Arntl)
GO:0002526	acute inflammatory response	1	6	0.0376649	0.40572	Sfur006776(ASH1L)
GO:0003321	positive regulation of blood pressure by epinephrine-norepinephrine	1	6	0.0376649	0.40572	Sfur007675(Gpr161)
GO:0039694	viral RNA genome replication	1	6	0.0376649	0.40572	Sfur013517(ATG16L1)
GO:0039703	RNA replication	1	6	0.0376649	0.40572	Sfur013517(ATG16L1)
GO:0051234	establishment of localization	21	2279	0.0380036	0.40572	MSTRG.14617(RANBP1);MSTRG.16085(Mapre3);MSTRG.22969(--);MSTRG.32271(CG1139);Sfur000424(CG17119);Sfur000838(SLC26A11);Sfur001170(IFT27);Sfur002079(PPP1R9A);Sfur002387(SLC17A5);Sfur003483(Madm);Sfur005310(Ucp2);Sfur005767(ACAA2);Sfur006059(SLC17A7);Sfur008868(ATOX1);Sfur010100(BEST3);Sfur010546(--);Sfur010797(Arntl);Sfur012506(APOD);Sfur012962(Tret1);Sfur012973(Mipep);Sfur013517(ATG16L1)
GO:0010035	response to inorganic substance	4	203	0.0400701	0.40572	MSTRG.14617(RANBP1);Sfur005310(Ucp2);Sfur010067(pde-5);Sfur010546(--)
GO:0097191	extrinsic apoptotic signaling pathway	2	50	0.0402583	0.40572	Sfur005841(RB1CC1);Sfur008091(RB1CC1)
GO:0001101	response to acid chemical	3	120	0.0408736	0.40572	MSTRG.14617(RANBP1);Sfur005310(Ucp2);Sfur010546(--)
GO:0006811	ion transport	9	734	0.0412935	0.40572	MSTRG.32271(CG1139);Sfur000424(CG17119);Sfur000838(SLC26A11);Sfur002387(SLC17A5);Sfur005310(Ucp2);Sfur006059(SLC17A7);Sfur008868(ATOX1);Sfur010100(BEST3);Sfur010546(--)
GO:0007586	digestion	2	51	0.0417333	0.40572	Sfur000881(Lip1);Sfur004871(--)
GO:0032387	negative regulation of intracellular transport	2	51	0.0417333	0.40572	Sfur005767(ACAA2);Sfur012506(APOD)
GO:1903008	organelle disassembly	2	52	0.0432284	0.40572	Sfur005841(RB1CC1);Sfur008091(RB1CC1)
GO:0016236	macroautophagy	3	123	0.0434642	0.40572	Sfur005841(RB1CC1);Sfur008091(RB1CC1);Sfur013517(ATG16L1)
GO:0002815	biosynthetic process of antibacterial peptides active against Gram-positive bacteria	1	7	0.0438054	0.40572	Sfur000631(SPE)
GO:0002816	regulation of biosynthetic process of antibacterial peptides active against Gram-positive bacteria	1	7	0.0438054	0.40572	Sfur000631(SPE)
GO:0003309	type B pancreatic cell differentiation	1	7	0.0438054	0.40572	Sfur010797(Arntl)
GO:0006965	positive regulation of biosynthetic process of antibacterial peptides active against Gram-positive bacteria	1	7	0.0438054	0.40572	Sfur000631(SPE)
GO:0009235	cobalamin metabolic process	1	7	0.0438054	0.40572	Sfur003398(MMAB)
GO:0010452	histone H3-K36 methylation	1	7	0.0438054	0.40572	Sfur006776(ASH1L)
GO:0016255	attachment of GPI anchor to protein	1	7	0.0438054	0.40572	Sfur005629(Pigu)
GO:0019369	arachidonic acid metabolic process	1	7	0.0438054	0.40572	Sfur013239(FAAH2)
GO:0030588	pseudocleavage	1	7	0.0438054	0.40572	MSTRG.16085(Mapre3)
GO:0046676	negative regulation of insulin secretion	1	7	0.0438054	0.40572	Sfur005310(Ucp2)
GO:0051823	regulation of synapse structural plasticity	1	7	0.0438054	0.40572	Sfur002079(PPP1R9A)
GO:0051938	L-glutamate import	1	7	0.0438054	0.40572	Sfur006059(SLC17A7)
GO:0060065	uterus development	1	7	0.0438054	0.40572	Sfur006776(ASH1L)
GO:2001014	regulation of skeletal muscle cell differentiation	1	7	0.0438054	0.40572	Sfur010797(Arntl)
GO:0043410	positive regulation of MAPK cascade	3	126	0.0461358	0.40572	Sfur005841(RB1CC1);Sfur007675(Gpr161);Sfur008091(RB1CC1)
GO:0030073	insulin secretion	2	54	0.046278	0.40572	Sfur005310(Ucp2);Sfur010797(Arntl)
GO:1903035	negative regulation of response to wounding	2	54	0.046278	0.40572	Sfur006776(ASH1L);Sfur012506(APOD)
GO:0042594	response to starvation	3	127	0.0470441	0.40572	Sfur005310(Ucp2);Sfur007299(--);Sfur009957(Upp1)
GO:0034440	lipid oxidation	2	56	0.0494048	0.40572	Sfur005767(ACAA2);Sfur012506(APOD)
GO:0006810	transport	20	2200	0.0494982	0.40572	MSTRG.14617(RANBP1);MSTRG.22969(--);MSTRG.32271(CG1139);Sfur000424(CG17119);Sfur000838(SLC26A11);Sfur001170(IFT27);Sfur002079(PPP1R9A);Sfur002387(SLC17A5);Sfur003483(Madm);Sfur005310(Ucp2);Sfur005767(ACAA2);Sfur006059(SLC17A7);Sfur008868(ATOX1);Sfur010100(BEST3);Sfur010546(--);Sfur010797(Arntl);Sfur012506(APOD);Sfur012962(Tret1);Sfur012973(Mipep);Sfur013517(ATG16L1)
GO:0006098	pentose-phosphate shunt	1	8	0.0499074	0.40572	Sfur006937(LMJF_27_0420)
GO:0007130	synaptonemal complex assembly	1	8	0.0499074	0.40572	Sfur011490(ball)
GO:0016188	synaptic vesicle maturation	1	8	0.0499074	0.40572	Sfur006059(SLC17A7)
GO:0018027	peptidyl-lysine dimethylation	1	8	0.0499074	0.40572	Sfur006776(ASH1L)
GO:0030717	karyosome formation	1	8	0.0499074	0.40572	Sfur011490(ball)
GO:0036098	male germ-line stem cell population maintenance	1	8	0.0499074	0.40572	Sfur011490(ball)
GO:0043173	nucleotide salvage	1	8	0.0499074	0.40572	Sfur009957(Upp1)
GO:0097237	cellular response to toxic substance	1	8	0.0499074	0.40572	Sfur002079(PPP1R9A)
GO:1901028	regulation of mitochondrial outer membrane permeabilization involved in apoptotic signaling pathway	1	8	0.0499074	0.40572	Sfur005767(ACAA2)
GO:0044703	multi-organism reproductive process	9	774	0.054751	0.40572	MSTRG.22969(--);MSTRG.29743(nas-13);Sfur001170(IFT27);Sfur005266(EbpIII);Sfur005310(Ucp2);Sfur006776(ASH1L);Sfur007299(--);Sfur010797(Arntl);Sfur011490(ball)
GO:0000165	MAPK cascade	4	225	0.0547893	0.40572	Sfur005841(RB1CC1);Sfur006776(ASH1L);Sfur007675(Gpr161);Sfur008091(RB1CC1)
GO:0043066	negative regulation of apoptotic process	4	225	0.0547893	0.40572	Sfur005310(Ucp2);Sfur005767(ACAA2);Sfur005841(RB1CC1);Sfur008091(RB1CC1)
GO:0023014	signal transduction by protein phosphorylation	4	226	0.05552	0.40572	Sfur005841(RB1CC1);Sfur006776(ASH1L);Sfur007675(Gpr161);Sfur008091(RB1CC1)
GO:0051224	negative regulation of protein transport	2	60	0.0558801	0.40572	Sfur005310(Ucp2);Sfur012506(APOD)
GO:0002781	antifungal peptide production	1	9	0.0559712	0.40572	Sfur000631(SPE)
GO:0002788	regulation of antifungal peptide production	1	9	0.0559712	0.40572	Sfur000631(SPE)
GO:0002804	positive regulation of antifungal peptide production	1	9	0.0559712	0.40572	Sfur000631(SPE)
GO:0006222	UMP biosynthetic process	1	9	0.0559712	0.40572	Sfur009957(Upp1)
GO:0006825	copper ion transport	1	9	0.0559712	0.40572	Sfur008868(ATOX1)
GO:0019732	antifungal humoral response	1	9	0.0559712	0.40572	Sfur000631(SPE)
GO:0030540	female genitalia development	1	9	0.0559712	0.40572	Sfur013880(ken)
GO:0034439	lipoprotein lipid oxidation	1	9	0.0559712	0.40572	Sfur012506(APOD)
GO:0034442	regulation of lipoprotein oxidation	1	9	0.0559712	0.40572	Sfur012506(APOD)
GO:0034443	negative regulation of lipoprotein oxidation	1	9	0.0559712	0.40572	Sfur012506(APOD)
GO:0042160	lipoprotein modification	1	9	0.0559712	0.40572	Sfur012506(APOD)
GO:0042161	lipoprotein oxidation	1	9	0.0559712	0.40572	Sfur012506(APOD)
GO:0042454	ribonucleoside catabolic process	1	9	0.0559712	0.40572	Sfur009957(Upp1)
GO:0045907	positive regulation of vasoconstriction	1	9	0.0559712	0.40572	Sfur007675(Gpr161)
GO:0046049	UMP metabolic process	1	9	0.0559712	0.40572	Sfur009957(Upp1)
GO:0046929	negative regulation of neurotransmitter secretion	1	9	0.0559712	0.40572	Sfur002079(PPP1R9A)
GO:0050748	negative regulation of lipoprotein metabolic process	1	9	0.0559712	0.40572	Sfur012506(APOD)
GO:0051156	glucose 6-phosphate metabolic process	1	9	0.0559712	0.40572	Sfur006937(LMJF_27_0420)
GO:0051589	negative regulation of neurotransmitter transport	1	9	0.0559712	0.40572	Sfur002079(PPP1R9A)
GO:0060587	regulation of lipoprotein lipid oxidation	1	9	0.0559712	0.40572	Sfur012506(APOD)
GO:0060588	negative regulation of lipoprotein lipid oxidation	1	9	0.0559712	0.40572	Sfur012506(APOD)
GO:0070071	proton-transporting two-sector ATPase complex assembly	1	9	0.0559712	0.40572	Sfur009541(GF10347)
GO:0071398	cellular response to fatty acid	1	9	0.0559712	0.40572	MSTRG.14617(RANBP1)
GO:0097345	mitochondrial outer membrane permeabilization	1	9	0.0559712	0.40572	Sfur005767(ACAA2)
GO:1900016	negative regulation of cytokine production involved in inflammatory response	1	9	0.0559712	0.40572	Sfur012506(APOD)
GO:1900150	regulation of defense response to fungus	1	9	0.0559712	0.40572	Sfur000631(SPE)
GO:2000097	regulation of smooth muscle cell-matrix adhesion	1	9	0.0559712	0.40572	Sfur012506(APOD)
GO:2000098	negative regulation of smooth muscle cell-matrix adhesion	1	9	0.0559712	0.40572	Sfur012506(APOD)
GO:2000402	negative regulation of lymphocyte migration	1	9	0.0559712	0.40572	Sfur012506(APOD)
GO:2000405	negative regulation of T cell migration	1	9	0.0559712	0.40572	Sfur012506(APOD)
GO:0048732	gland development	4	228	0.0569972	0.40798	Sfur005310(Ucp2);Sfur005841(RB1CC1);Sfur006776(ASH1L);Sfur008091(RB1CC1)
GO:0046328	regulation of JNK cascade	2	62	0.0592241	0.40798	Sfur005841(RB1CC1);Sfur008091(RB1CC1)
GO:1904950	negative regulation of establishment of protein localization	2	62	0.0592241	0.40798	Sfur005310(Ucp2);Sfur012506(APOD)
GO:0090276	regulation of peptide hormone secretion	2	63	0.0609217	0.40798	Sfur005310(Ucp2);Sfur010797(Arntl)
GO:0043069	negative regulation of programmed cell death	4	234	0.0615563	0.40798	Sfur005310(Ucp2);Sfur005767(ACAA2);Sfur005841(RB1CC1);Sfur008091(RB1CC1)
GO:0001893	maternal placenta development	1	10	0.0619969	0.40798	Sfur006776(ASH1L)
GO:0002686	negative regulation of leukocyte migration	1	10	0.0619969	0.40798	Sfur012506(APOD)
GO:0010460	positive regulation of heart rate	1	10	0.0619969	0.40798	Sfur007675(Gpr161)
GO:0014012	peripheral nervous system axon regeneration	1	10	0.0619969	0.40798	Sfur012506(APOD)
GO:0019321	pentose metabolic process	1	10	0.0619969	0.40798	Sfur006937(LMJF_27_0420)
GO:0031018	endocrine pancreas development	1	10	0.0619969	0.40798	Sfur010797(Arntl)
GO:0031507	heterochromatin assembly	1	10	0.0619969	0.40798	Sfur006024(BAHD1)
GO:0042634	regulation of hair cycle	1	10	0.0619969	0.40798	Sfur010797(Arntl)
GO:0043124	negative regulation of I-kappaB kinase/NF-kappaB signaling	1	10	0.0619969	0.40798	Sfur006776(ASH1L)
GO:0048641	regulation of skeletal muscle tissue development	1	10	0.0619969	0.40798	Sfur010797(Arntl)
GO:0055070	copper ion homeostasis	1	10	0.0619969	0.40798	Sfur008868(ATOX1)
GO:0061669	spontaneous neurotransmitter secretion	1	10	0.0619969	0.40798	Sfur002079(PPP1R9A)
GO:0070193	synaptonemal complex organization	1	10	0.0619969	0.40798	Sfur011490(ball)
GO:0098814	spontaneous synaptic transmission	1	10	0.0619969	0.40798	Sfur002079(PPP1R9A)
GO:1902110	positive regulation of mitochondrial membrane permeability involved in apoptotic process	1	10	0.0619969	0.40798	Sfur005767(ACAA2)
GO:0044708	single-organism behavior	5	337	0.0627807	0.411243	MSTRG.16085(Mapre3);Sfur005266(EbpIII);Sfur006059(SLC17A7);Sfur007299(--);Sfur010067(pde-5)
GO:0002791	regulation of peptide secretion	2	65	0.0643667	0.416662	Sfur005310(Ucp2);Sfur010797(Arntl)
GO:0016241	regulation of macroautophagy	2	67	0.0678763	0.416662	Sfur005841(RB1CC1);Sfur008091(RB1CC1)
GO:0007176	regulation of epidermal growth factor-activated receptor activity	1	11	0.0679848	0.416662	MSTRG.22969(--)
GO:0009173	pyrimidine ribonucleoside monophosphate metabolic process	1	11	0.0679848	0.416662	Sfur009957(Upp1)
GO:0009174	pyrimidine ribonucleoside monophosphate biosynthetic process	1	11	0.0679848	0.416662	Sfur009957(Upp1)
GO:0016559	peroxisome fission	1	11	0.0679848	0.416662	Sfur000712(PEX11G)
GO:0032682	negative regulation of chemokine production	1	11	0.0679848	0.416662	Sfur012506(APOD)
GO:0042628	mating plug formation	1	11	0.0679848	0.416662	Sfur005266(EbpIII)
GO:0044704	single-organism reproductive behavior	1	11	0.0679848	0.416662	Sfur005266(EbpIII)
GO:0045297	post-mating behavior	1	11	0.0679848	0.416662	Sfur005266(EbpIII)
GO:0061302	smooth muscle cell-matrix adhesion	1	11	0.0679848	0.416662	Sfur012506(APOD)
GO:0071605	monocyte chemotactic protein-1 production	1	11	0.0679848	0.416662	Sfur012506(APOD)
GO:0071637	regulation of monocyte chemotactic protein-1 production	1	11	0.0679848	0.416662	Sfur012506(APOD)
GO:0071638	negative regulation of monocyte chemotactic protein-1 production	1	11	0.0679848	0.416662	Sfur012506(APOD)
GO:1902108	regulation of mitochondrial membrane permeability involved in apoptotic process	1	11	0.0679848	0.416662	Sfur005767(ACAA2)
GO:0006468	protein phosphorylation	8	688	0.0688729	0.420301	MSTRG.22969(--);Sfur002079(PPP1R9A);Sfur003483(Madm);Sfur005841(RB1CC1);Sfur006776(ASH1L);Sfur007675(Gpr161);Sfur008091(RB1CC1);Sfur011490(ball)
GO:0009306	protein secretion	3	150	0.0703204	0.42335	Sfur003483(Madm);Sfur005310(Ucp2);Sfur010797(Arntl)
GO:0009163	nucleoside biosynthetic process	2	69	0.0714483	0.42335	Sfur003978(PUDP);Sfur009957(Upp1)
GO:0090087	regulation of peptide transport	2	69	0.0714483	0.42335	Sfur005310(Ucp2);Sfur010797(Arntl)
GO:0001932	regulation of protein phosphorylation	6	463	0.0732172	0.42335	MSTRG.22969(--);Sfur002079(PPP1R9A);Sfur005841(RB1CC1);Sfur006776(ASH1L);Sfur007675(Gpr161);Sfur008091(RB1CC1)
GO:0002534	cytokine production involved in inflammatory response	1	12	0.0739352	0.42335	Sfur012506(APOD)
GO:0010752	regulation of cGMP-mediated signaling	1	12	0.0739352	0.42335	Sfur010067(pde-5)
GO:0015813	L-glutamate transport	1	12	0.0739352	0.42335	Sfur006059(SLC17A7)
GO:0034394	protein localization to cell surface	1	12	0.0739352	0.42335	Sfur005629(Pigu)
GO:0045777	positive regulation of blood pressure	1	12	0.0739352	0.42335	Sfur007675(Gpr161)
GO:0045823	positive regulation of heart contraction	1	12	0.0739352	0.42335	Sfur007675(Gpr161)
GO:1900015	regulation of cytokine production involved in inflammatory response	1	12	0.0739352	0.42335	Sfur012506(APOD)
GO:1900271	regulation of long-term synaptic potentiation	1	12	0.0739352	0.42335	Sfur002079(PPP1R9A)
GO:2000404	regulation of T cell migration	1	12	0.0739352	0.42335	Sfur012506(APOD)
GO:0023051	regulation of signaling	13	1338	0.0750649	0.42335	MSTRG.22969(--);Sfur000631(SPE);Sfur002079(PPP1R9A);Sfur005310(Ucp2);Sfur005629(Pigu);Sfur005767(ACAA2);Sfur005841(RB1CC1);Sfur006776(ASH1L);Sfur007675(Gpr161);Sfur008091(RB1CC1);Sfur010067(pde-5);Sfur010797(Arntl);Sfur012506(APOD)
GO:0009267	cellular response to starvation	2	73	0.0787714	0.42335	Sfur005310(Ucp2);Sfur009957(Upp1)
GO:0050727	regulation of inflammatory response	2	73	0.0787714	0.42335	Sfur006776(ASH1L);Sfur012506(APOD)
GO:1901659	glycosyl compound biosynthetic process	2	73	0.0787714	0.42335	Sfur003978(PUDP);Sfur009957(Upp1)
GO:0046942	carboxylic acid transport	3	158	0.079438	0.42335	MSTRG.32271(CG1139);Sfur000424(CG17119);Sfur006059(SLC17A7)
GO:0008272	sulfate transport	1	13	0.0798482	0.42335	Sfur000838(SLC26A11)
GO:0010642	negative regulation of platelet-derived growth factor receptor signaling pathway	1	13	0.0798482	0.42335	Sfur012506(APOD)
GO:0015800	acidic amino acid transport	1	13	0.0798482	0.42335	Sfur006059(SLC17A7)
GO:0019229	regulation of vasoconstriction	1	13	0.0798482	0.42335	Sfur007675(Gpr161)
GO:0034982	mitochondrial protein processing	1	13	0.0798482	0.42335	Sfur012973(Mipep)
GO:0035794	positive regulation of mitochondrial membrane permeability	1	13	0.0798482	0.42335	Sfur005767(ACAA2)
GO:0036335	intestinal stem cell homeostasis	1	13	0.0798482	0.42335	Sfur003483(Madm)
GO:0045599	negative regulation of fat cell differentiation	1	13	0.0798482	0.42335	Sfur010797(Arntl)
GO:0048013	ephrin receptor signaling pathway	1	13	0.0798482	0.42335	Sfur009576(SS18L1)
GO:0050746	regulation of lipoprotein metabolic process	1	13	0.0798482	0.42335	Sfur012506(APOD)
GO:0051497	negative regulation of stress fiber assembly	1	13	0.0798482	0.42335	Sfur002079(PPP1R9A)
GO:0072678	T cell migration	1	13	0.0798482	0.42335	Sfur012506(APOD)
GO:0097421	liver regeneration	1	13	0.0798482	0.42335	Sfur005310(Ucp2)
GO:0098700	neurotransmitter loading into synaptic vesicle	1	13	0.0798482	0.42335	Sfur006059(SLC17A7)
GO:1902686	mitochondrial outer membrane permeabilization involved in programmed cell death	1	13	0.0798482	0.42335	Sfur005767(ACAA2)
GO:2000401	regulation of lymphocyte migration	1	13	0.0798482	0.42335	Sfur012506(APOD)
GO:0015849	organic acid transport	3	159	0.0806128	0.42335	MSTRG.32271(CG1139);Sfur000424(CG17119);Sfur006059(SLC17A7)
GO:0031099	regeneration	2	74	0.080638	0.42335	Sfur005310(Ucp2);Sfur012506(APOD)
GO:0032104	regulation of response to extracellular stimulus	2	74	0.080638	0.42335	Sfur005841(RB1CC1);Sfur008091(RB1CC1)
GO:0032107	regulation of response to nutrient levels	2	74	0.080638	0.42335	Sfur005841(RB1CC1);Sfur008091(RB1CC1)
GO:0010646	regulation of cell communication	13	1356	0.081697	0.426522	MSTRG.22969(--);Sfur000631(SPE);Sfur002079(PPP1R9A);Sfur005310(Ucp2);Sfur005629(Pigu);Sfur005767(ACAA2);Sfur005841(RB1CC1);Sfur006776(ASH1L);Sfur007675(Gpr161);Sfur008091(RB1CC1);Sfur010067(pde-5);Sfur010797(Arntl);Sfur012506(APOD)
GO:0030072	peptide hormone secretion	2	75	0.0825185	0.426522	Sfur005310(Ucp2);Sfur010797(Arntl)
GO:0046883	regulation of hormone secretion	2	75	0.0825185	0.426522	Sfur005310(Ucp2);Sfur010797(Arntl)
GO:0055082	cellular chemical homeostasis	4	259	0.0825718	0.426522	Sfur005310(Ucp2);Sfur006059(SLC17A7);Sfur007675(Gpr161);Sfur008868(ATOX1)
GO:1902532	negative regulation of intracellular signal transduction	3	162	0.0841829	0.426522	Sfur006776(ASH1L);Sfur010067(pde-5);Sfur010797(Arntl)
GO:0007254	JNK cascade	2	76	0.0844125	0.426522	Sfur005841(RB1CC1);Sfur008091(RB1CC1)
GO:0071705	nitrogen compound transport	5	369	0.0851679	0.426522	MSTRG.32271(CG1139);Sfur000424(CG17119);Sfur005310(Ucp2);Sfur006059(SLC17A7);Sfur010797(Arntl)
GO:0044699	single-organism process	51	7313	0.0854524	0.426522	MSTRG.14617(RANBP1);MSTRG.14666(Stt3a);MSTRG.16085(Mapre3);MSTRG.20533(SLC16A14);MSTRG.22969(--);MSTRG.29743(nas-13);MSTRG.32271(CG1139);MSTRG.32769(Ccp84Ab);MSTRG.32773(ACP21);MSTRG.32778(ACP21);Sfur000424(CG17119);Sfur000631(SPE);Sfur000712(PEX11G);Sfur000838(SLC26A11);Sfur000881(Lip1);Sfur001170(IFT27);Sfur002079(PPP1R9A);Sfur002163(bdl);Sfur002387(SLC17A5);Sfur003398(MMAB);Sfur003483(Madm);Sf…
GO:0000303	response to superoxide	1	14	0.0857242	0.426522	Sfur005310(Ucp2)
GO:0000305	response to oxygen radical	1	14	0.0857242	0.426522	Sfur005310(Ucp2)
GO:0009164	nucleoside catabolic process	1	14	0.0857242	0.426522	Sfur009957(Upp1)
GO:0009409	response to cold	1	14	0.0857242	0.426522	Sfur005310(Ucp2)
GO:0019682	glyceraldehyde-3-phosphate metabolic process	1	14	0.0857242	0.426522	Sfur006937(LMJF_27_0420)
GO:0046132	pyrimidine ribonucleoside biosynthetic process	1	14	0.0857242	0.426522	Sfur009957(Upp1)
GO:0060135	maternal process involved in female pregnancy	1	14	0.0857242	0.426522	Sfur006776(ASH1L)
GO:1902578	single-organism localization	18	2056	0.0860634	0.426522	MSTRG.16085(Mapre3);MSTRG.32271(CG1139);Sfur000424(CG17119);Sfur000838(SLC26A11);Sfur001170(IFT27);Sfur002079(PPP1R9A);Sfur002387(SLC17A5);Sfur003483(Madm);Sfur005310(Ucp2);Sfur005767(ACAA2);Sfur006059(SLC17A7);Sfur008868(ATOX1);Sfur010100(BEST3);Sfur010546(--);Sfur010797(Arntl);Sfur012506(APOD);Sfur012962(Tret1);Sfur012973(Mipep)
GO:0042157	lipoprotein metabolic process	2	77	0.0863198	0.426522	Sfur005629(Pigu);Sfur012506(APOD)
GO:0097190	apoptotic signaling pathway	3	165	0.0878206	0.431503	Sfur005767(ACAA2);Sfur005841(RB1CC1);Sfur008091(RB1CC1)
GO:0044765	single-organism transport	17	1924	0.088965	0.431503	MSTRG.32271(CG1139);Sfur000424(CG17119);Sfur000838(SLC26A11);Sfur001170(IFT27);Sfur002079(PPP1R9A);Sfur002387(SLC17A5);Sfur003483(Madm);Sfur005310(Ucp2);Sfur005767(ACAA2);Sfur006059(SLC17A7);Sfur008868(ATOX1);Sfur010100(BEST3);Sfur010546(--);Sfur010797(Arntl);Sfur012506(APOD);Sfur012962(Tret1);Sfur012973(Mipep)
GO:0032872	regulation of stress-activated MAPK cascade	2	79	0.0901736	0.431503	Sfur005841(RB1CC1);Sfur008091(RB1CC1)
GO:0032101	regulation of response to external stimulus	5	376	0.0905687	0.431503	Sfur000631(SPE);Sfur005841(RB1CC1);Sfur006776(ASH1L);Sfur008091(RB1CC1);Sfur012506(APOD)
GO:0003401	axis elongation	1	15	0.0915632	0.431503	Sfur008722(PTK7)
GO:0009218	pyrimidine ribonucleotide metabolic process	1	15	0.0915632	0.431503	Sfur009957(Upp1)
GO:0009220	pyrimidine ribonucleotide biosynthetic process	1	15	0.0915632	0.431503	Sfur009957(Upp1)
GO:0032528	microvillus organization	1	15	0.0915632	0.431503	Sfur010067(pde-5)
GO:0035883	enteroendocrine cell differentiation	1	15	0.0915632	0.431503	Sfur010797(Arntl)
GO:0035914	skeletal muscle cell differentiation	1	15	0.0915632	0.431503	Sfur010797(Arntl)
GO:0046131	pyrimidine ribonucleoside metabolic process	1	15	0.0915632	0.431503	Sfur009957(Upp1)
GO:0051231	spindle elongation	1	15	0.0915632	0.431503	MSTRG.16085(Mapre3)
GO:1901985	positive regulation of protein acetylation	1	15	0.0915632	0.431503	Sfur010797(Arntl)
GO:1903524	positive regulation of blood circulation	1	15	0.0915632	0.431503	Sfur007675(Gpr161)
GO:0051704	multi-organism process	12	1248	0.0918606	0.431503	MSTRG.14617(RANBP1);MSTRG.22969(--);MSTRG.29743(nas-13);Sfur000631(SPE);Sfur001170(IFT27);Sfur005266(EbpIII);Sfur005310(Ucp2);Sfur006776(ASH1L);Sfur007299(--);Sfur010797(Arntl);Sfur011490(ball);Sfur013517(ATG16L1)
GO:0002790	peptide secretion	2	81	0.094078	0.433141	Sfur005310(Ucp2);Sfur010797(Arntl)
GO:0006323	DNA packaging	2	81	0.094078	0.433141	Sfur006024(BAHD1);Sfur011490(ball)
GO:0031348	negative regulation of defense response	2	81	0.094078	0.433141	Sfur006776(ASH1L);Sfur012506(APOD)
GO:0019953	sexual reproduction	8	737	0.0941199	0.433141	MSTRG.22969(--);MSTRG.29743(nas-13);Sfur001170(IFT27);Sfur005266(EbpIII);Sfur006776(ASH1L);Sfur007299(--);Sfur010797(Arntl);Sfur011490(ball)
GO:0031669	cellular response to nutrient levels	2	82	0.0960485	0.433141	Sfur005310(Ucp2);Sfur009957(Upp1)
GO:0070302	regulation of stress-activated protein kinase signaling cascade	2	82	0.0960485	0.433141	Sfur005841(RB1CC1);Sfur008091(RB1CC1)
GO:0071229	cellular response to acid chemical	2	82	0.0960485	0.433141	MSTRG.14617(RANBP1);Sfur010546(--)
GO:0002532	production of molecular mediator involved in inflammatory response	1	16	0.0973657	0.433141	Sfur012506(APOD)
GO:0003044	regulation of systemic arterial blood pressure mediated by a chemical signal	1	16	0.0973657	0.433141	Sfur007675(Gpr161)
GO:0007143	female meiotic division	1	16	0.0973657	0.433141	Sfur011490(ball)
GO:0032232	negative regulation of actin filament bundle assembly	1	16	0.0973657	0.433141	Sfur002079(PPP1R9A)
GO:0032642	regulation of chemokine production	1	16	0.0973657	0.433141	Sfur012506(APOD)
GO:0045844	positive regulation of striated muscle tissue development	1	16	0.0973657	0.433141	Sfur010797(Arntl)
GO:0071875	adrenergic receptor signaling pathway	1	16	0.0973657	0.433141	Sfur007675(Gpr161)
GO:0071880	adenylate cyclase-activating adrenergic receptor signaling pathway	1	16	0.0973657	0.433141	Sfur007675(Gpr161)
GO:0072676	lymphocyte migration	1	16	0.0973657	0.433141	Sfur012506(APOD)
GO:1901863	positive regulation of muscle tissue development	1	16	0.0973657	0.433141	Sfur010797(Arntl)
GO:0019827	stem cell population maintenance	2	83	0.098031	0.4334	Sfur009576(SS18L1);Sfur011490(ball)
GO:0098727	maintenance of cell number	2	83	0.098031	0.4334	Sfur009576(SS18L1);Sfur011490(ball)
GO:0022414	reproductive process	10	1001	0.0992402	0.437392	MSTRG.22969(--);MSTRG.29743(nas-13);Sfur001170(IFT27);Sfur005266(EbpIII);Sfur005310(Ucp2);Sfur006776(ASH1L);Sfur007299(--);Sfur010797(Arntl);Sfur011490(ball);Sfur013880(ken)
GO:0007631	feeding behavior	2	84	0.100025	0.43831	Sfur007299(--);Sfur010546(--)
GO:0023061	signal release	3	177	0.103022	0.43831	Sfur002079(PPP1R9A);Sfur005310(Ucp2);Sfur010797(Arntl)
GO:0002792	negative regulation of peptide secretion	1	17	0.103132	0.43831	Sfur005310(Ucp2)
GO:0006144	purine nucleobase metabolic process	1	17	0.103132	0.43831	Sfur009447(Uro)
GO:0007320	insemination	1	17	0.103132	0.43831	Sfur005266(EbpIII)
GO:0016572	histone phosphorylation	1	17	0.103132	0.43831	Sfur011490(ball)
GO:0032602	chemokine production	1	17	0.103132	0.43831	Sfur012506(APOD)
GO:0042595	behavioral response to starvation	1	17	0.103132	0.43831	Sfur007299(--)
GO:0046902	regulation of mitochondrial membrane permeability	1	17	0.103132	0.43831	Sfur005767(ACAA2)
GO:0061178	regulation of insulin secretion involved in cellular response to glucose stimulus	1	17	0.103132	0.43831	Sfur005310(Ucp2)
GO:0072529	pyrimidine-containing compound catabolic process	1	17	0.103132	0.43831	Sfur009957(Upp1)
GO:0090278	negative regulation of peptide hormone secretion	1	17	0.103132	0.43831	Sfur005310(Ucp2)
GO:0007166	cell surface receptor signaling pathway	10	1010	0.103832	0.439975	MSTRG.22969(--);Sfur000631(SPE);Sfur001170(IFT27);Sfur002079(PPP1R9A);Sfur005841(RB1CC1);Sfur008091(RB1CC1);Sfur008722(PTK7);Sfur009576(SS18L1);Sfur010797(Arntl);Sfur012506(APOD)
GO:0060548	negative regulation of cell death	4	282	0.104664	0.441749	Sfur005310(Ucp2);Sfur005767(ACAA2);Sfur005841(RB1CC1);Sfur008091(RB1CC1)
GO:0000003	reproduction	10	1012	0.104869	0.441749	MSTRG.22969(--);MSTRG.29743(nas-13);Sfur001170(IFT27);Sfur005266(EbpIII);Sfur005310(Ucp2);Sfur006776(ASH1L);Sfur007299(--);Sfur010797(Arntl);Sfur011490(ball);Sfur013880(ken)
GO:0016042	lipid catabolic process	3	180	0.106978	0.444155	Sfur000881(Lip1);Sfur005767(ACAA2);Sfur013239(FAAH2)
GO:0000413	protein peptidyl-prolyl isomerization	1	18	0.108862	0.444155	Sfur001080(Ppig)
GO:0008343	adult feeding behavior	1	18	0.108862	0.444155	Sfur007299(--)
GO:0010640	regulation of platelet-derived growth factor receptor signaling pathway	1	18	0.108862	0.444155	Sfur012506(APOD)
GO:0010823	negative regulation of mitochondrion organization	1	18	0.108862	0.444155	Sfur005767(ACAA2)
GO:0035773	insulin secretion involved in cellular response to glucose stimulus	1	18	0.108862	0.444155	Sfur005310(Ucp2)
GO:0048636	positive regulation of muscle organ development	1	18	0.108862	0.444155	Sfur010797(Arntl)
GO:0050709	negative regulation of protein secretion	1	18	0.108862	0.444155	Sfur005310(Ucp2)
GO:0051895	negative regulation of focal adhesion assembly	1	18	0.108862	0.444155	Sfur012506(APOD)
GO:0090559	regulation of membrane permeability	1	18	0.108862	0.444155	Sfur005767(ACAA2)
GO:1903392	negative regulation of adherens junction organization	1	18	0.108862	0.444155	Sfur012506(APOD)
GO:0042325	regulation of phosphorylation	6	519	0.111401	0.45263	MSTRG.22969(--);Sfur002079(PPP1R9A);Sfur005841(RB1CC1);Sfur006776(ASH1L);Sfur007675(Gpr161);Sfur008091(RB1CC1)
GO:0009605	response to external stimulus	11	1157	0.111573	0.45263	Sfur000631(SPE);Sfur002163(bdl);Sfur005266(EbpIII);Sfur005310(Ucp2);Sfur005841(RB1CC1);Sfur006776(ASH1L);Sfur007299(--);Sfur008091(RB1CC1);Sfur009957(Upp1);Sfur010067(pde-5);Sfur012506(APOD)
GO:0009966	regulation of signal transduction	11	1161	0.113622	0.453144	MSTRG.22969(--);Sfur000631(SPE);Sfur005629(Pigu);Sfur005767(ACAA2);Sfur005841(RB1CC1);Sfur006776(ASH1L);Sfur007675(Gpr161);Sfur008091(RB1CC1);Sfur010067(pde-5);Sfur010797(Arntl);Sfur012506(APOD)
GO:0046879	hormone secretion	2	91	0.114294	0.453144	Sfur005310(Ucp2);Sfur010797(Arntl)
GO:0001676	long-chain fatty acid metabolic process	1	19	0.114555	0.453144	Sfur013239(FAAH2)
GO:0002067	glandular epithelial cell differentiation	1	19	0.114555	0.453144	Sfur010797(Arntl)
GO:0002803	positive regulation of antibacterial peptide production	1	19	0.114555	0.453144	Sfur000631(SPE)
GO:0006963	positive regulation of antibacterial peptide biosynthetic process	1	19	0.114555	0.453144	Sfur000631(SPE)
GO:0036099	female germ-line stem cell population maintenance	1	19	0.114555	0.453144	Sfur011490(ball)
GO:0042753	positive regulation of circadian rhythm	1	19	0.114555	0.453144	Sfur010797(Arntl)
GO:1901889	negative regulation of cell junction assembly	1	19	0.114555	0.453144	Sfur012506(APOD)
GO:1902531	regulation of intracellular signal transduction	7	646	0.114891	0.453216	Sfur005629(Pigu);Sfur005841(RB1CC1);Sfur006776(ASH1L);Sfur007675(Gpr161);Sfur008091(RB1CC1);Sfur010067(pde-5);Sfur010797(Arntl)
GO:0001666	response to hypoxia	2	93	0.118464	0.460227	Sfur005310(Ucp2);Sfur005767(ACAA2)
GO:0015833	peptide transport	2	93	0.118464	0.460227	Sfur005310(Ucp2);Sfur010797(Arntl)
GO:0031668	cellular response to extracellular stimulus	2	93	0.118464	0.460227	Sfur005310(Ucp2);Sfur009957(Upp1)
GO:0002807	positive regulation of antimicrobial peptide biosynthetic process	1	20	0.120213	0.460227	Sfur000631(SPE)
GO:0009268	response to pH	1	20	0.120213	0.460227	Sfur010067(pde-5)
GO:0042149	cellular response to glucose starvation	1	20	0.120213	0.460227	Sfur009957(Upp1)
GO:0043092	L-amino acid import	1	20	0.120213	0.460227	Sfur006059(SLC17A7)
GO:0046365	monosaccharide catabolic process	1	20	0.120213	0.460227	Sfur006937(LMJF_27_0420)
GO:0046888	negative regulation of hormone secretion	1	20	0.120213	0.460227	Sfur005310(Ucp2)
GO:0070828	heterochromatin organization	1	20	0.120213	0.460227	Sfur006024(BAHD1)
GO:2000772	regulation of cellular senescence	1	20	0.120213	0.460227	Sfur010797(Arntl)
GO:0009914	hormone transport	2	95	0.122672	0.463129	Sfur005310(Ucp2);Sfur010797(Arntl)
GO:0002778	antibacterial peptide production	1	21	0.125836	0.463129	Sfur000631(SPE)
GO:0002780	antibacterial peptide biosynthetic process	1	21	0.125836	0.463129	Sfur000631(SPE)
GO:0002786	regulation of antibacterial peptide production	1	21	0.125836	0.463129	Sfur000631(SPE)
GO:0002808	regulation of antibacterial peptide biosynthetic process	1	21	0.125836	0.463129	Sfur000631(SPE)
GO:0006739	NADP metabolic process	1	21	0.125836	0.463129	Sfur006937(LMJF_27_0420)
GO:0007129	synapsis	1	21	0.125836	0.463129	Sfur011490(ball)
GO:0009129	pyrimidine nucleoside monophosphate metabolic process	1	21	0.125836	0.463129	Sfur009957(Upp1)
GO:0009130	pyrimidine nucleoside monophosphate biosynthetic process	1	21	0.125836	0.463129	Sfur009957(Upp1)
GO:0019934	cGMP-mediated signaling	1	21	0.125836	0.463129	Sfur010067(pde-5)
GO:0031100	organ regeneration	1	21	0.125836	0.463129	Sfur005310(Ucp2)
GO:0042308	negative regulation of protein import into nucleus	1	21	0.125836	0.463129	Sfur012506(APOD)
GO:0043090	amino acid import	1	21	0.125836	0.463129	Sfur006059(SLC17A7)
GO:0044033	multi-organism metabolic process	1	21	0.125836	0.463129	Sfur013517(ATG16L1)
GO:1904590	negative regulation of protein import	1	21	0.125836	0.463129	Sfur012506(APOD)
GO:0051403	stress-activated MAPK cascade	2	97	0.126917	0.465906	Sfur005841(RB1CC1);Sfur008091(RB1CC1)
GO:0006820	anion transport	4	304	0.128084	0.466152	MSTRG.32271(CG1139);Sfur000424(CG17119);Sfur000838(SLC26A11);Sfur006059(SLC17A7)
GO:0031401	positive regulation of protein modification process	5	421	0.129398	0.466152	Sfur002079(PPP1R9A);Sfur005841(RB1CC1);Sfur007675(Gpr161);Sfur008091(RB1CC1);Sfur010797(Arntl)
GO:0002777	antimicrobial peptide biosynthetic process	1	22	0.131423	0.466152	Sfur000631(SPE)
GO:0002805	regulation of antimicrobial peptide biosynthetic process	1	22	0.131423	0.466152	Sfur000631(SPE)
GO:0032007	negative regulation of TOR signaling	1	22	0.131423	0.466152	Sfur010797(Arntl)
GO:0042756	drinking behavior	1	22	0.131423	0.466152	Sfur010546(--)
GO:0045851	pH reduction	1	22	0.131423	0.466152	Sfur006059(SLC17A7)
GO:0048662	negative regulation of smooth muscle cell proliferation	1	22	0.131423	0.466152	Sfur012506(APOD)
GO:0050830	defense response to Gram-positive bacterium	1	22	0.131423	0.466152	Sfur000631(SPE)
GO:0051452	intracellular pH reduction	1	22	0.131423	0.466152	Sfur006059(SLC17A7)
GO:0060999	positive regulation of dendritic spine development	1	22	0.131423	0.466152	Sfur002079(PPP1R9A)
GO:0072337	modified amino acid transport	1	22	0.131423	0.466152	Sfur000424(CG17119)
GO:0001934	positive regulation of protein phosphorylation	4	307	0.131439	0.466152	Sfur002079(PPP1R9A);Sfur005841(RB1CC1);Sfur007675(Gpr161);Sfur008091(RB1CC1)
GO:0051179	localization	23	2908	0.131554	0.466152	MSTRG.14617(RANBP1);MSTRG.16085(Mapre3);MSTRG.22969(--);MSTRG.32271(CG1139);Sfur000424(CG17119);Sfur000838(SLC26A11);Sfur001170(IFT27);Sfur002079(PPP1R9A);Sfur002387(SLC17A5);Sfur003483(Madm);Sfur005310(Ucp2);Sfur005629(Pigu);Sfur005767(ACAA2);Sfur006059(SLC17A7);Sfur006776(ASH1L);Sfur008868(ATOX1);Sfur010100(BEST3);Sfur010546(--);Sfur010797(Arntl);Sfur012506(APOD);Sfur012962(Tret1);Sfur012973(Mi…
GO:0018208	peptidyl-proline modification	1	23	0.136976	0.478242	Sfur001080(Ppig)
GO:0030539	male genitalia development	1	23	0.136976	0.478242	Sfur013880(ken)
GO:0042310	vasoconstriction	1	23	0.136976	0.478242	Sfur007675(Gpr161)
GO:0045840	positive regulation of mitotic nuclear division	1	23	0.136976	0.478242	MSTRG.14617(RANBP1)
GO:0060291	long-term synaptic potentiation	1	23	0.136976	0.478242	Sfur002079(PPP1R9A)
GO:0090342	regulation of cell aging	1	23	0.136976	0.478242	Sfur010797(Arntl)
GO:0042886	amide transport	2	102	0.13768	0.479528	Sfur005310(Ucp2);Sfur010797(Arntl)
GO:0071496	cellular response to external stimulus	2	103	0.139857	0.484476	Sfur005310(Ucp2);Sfur009957(Upp1)
GO:0036293	response to decreased oxygen levels	2	104	0.142041	0.484476	Sfur005310(Ucp2);Sfur005767(ACAA2)
GO:0001953	negative regulation of cell-matrix adhesion	1	24	0.142493	0.484476	Sfur012506(APOD)
GO:0002027	regulation of heart rate	1	24	0.142493	0.484476	Sfur007675(Gpr161)
GO:0031016	pancreas development	1	24	0.142493	0.484476	Sfur010797(Arntl)
GO:0032635	interleukin-6 production	1	24	0.142493	0.484476	Sfur006776(ASH1L)
GO:0034198	cellular response to amino acid starvation	1	24	0.142493	0.484476	Sfur005310(Ucp2)
GO:0045143	homologous chromosome segregation	1	24	0.142493	0.484476	Sfur011490(ball)
GO:0051881	regulation of mitochondrial membrane potential	1	24	0.142493	0.484476	Sfur005310(Ucp2)
GO:1900426	positive regulation of defense response to bacterium	1	24	0.142493	0.484476	Sfur000631(SPE)
GO:0031399	regulation of protein modification process	7	685	0.143619	0.486076	MSTRG.22969(--);Sfur002079(PPP1R9A);Sfur005841(RB1CC1);Sfur006776(ASH1L);Sfur007675(Gpr161);Sfur008091(RB1CC1);Sfur010797(Arntl)
GO:0035556	intracellular signal transduction	9	946	0.143644	0.486076	Sfur003483(Madm);Sfur005629(Pigu);Sfur005841(RB1CC1);Sfur006776(ASH1L);Sfur007675(Gpr161);Sfur008091(RB1CC1);Sfur009576(SS18L1);Sfur010067(pde-5);Sfur010797(Arntl)
GO:0044282	small molecule catabolic process	3	207	0.1451	0.489069	Sfur005767(ACAA2);Sfur006937(LMJF_27_0420);Sfur009447(Uro)
GO:0031098	stress-activated protein kinase signaling cascade	2	106	0.146432	0.489069	Sfur005841(RB1CC1);Sfur008091(RB1CC1)
GO:0007158	neuron cell-cell adhesion	1	25	0.147976	0.489069	Sfur002163(bdl)
GO:0007620	copulation	1	25	0.147976	0.489069	Sfur005266(EbpIII)
GO:0044236	multicellular organism metabolic process	1	25	0.147976	0.489069	Sfur005310(Ucp2)
GO:0045598	regulation of fat cell differentiation	1	25	0.147976	0.489069	Sfur010797(Arntl)
GO:0048008	platelet-derived growth factor receptor signaling pathway	1	25	0.147976	0.489069	Sfur012506(APOD)
GO:0051785	positive regulation of nuclear division	1	25	0.147976	0.489069	MSTRG.14617(RANBP1)
GO:0061097	regulation of protein tyrosine kinase activity	1	25	0.147976	0.489069	MSTRG.22969(--)
GO:0070050	neuron cellular homeostasis	1	25	0.147976	0.489069	Sfur006059(SLC17A7)
GO:0050708	regulation of protein secretion	2	107	0.148639	0.489069	Sfur005310(Ucp2);Sfur010797(Arntl)
GO:0070482	response to oxygen levels	2	107	0.148639	0.489069	Sfur005310(Ucp2);Sfur005767(ACAA2)
GO:0007618	mating	2	108	0.150852	0.492335	Sfur005266(EbpIII);Sfur007299(--)
GO:0019725	cellular homeostasis	4	325	0.152329	0.492335	Sfur005310(Ucp2);Sfur006059(SLC17A7);Sfur007675(Gpr161);Sfur008868(ATOX1)
GO:1903530	regulation of secretion by cell	3	212	0.152608	0.492335	Sfur002079(PPP1R9A);Sfur005310(Ucp2);Sfur010797(Arntl)
GO:0002685	regulation of leukocyte migration	1	26	0.153424	0.492335	Sfur012506(APOD)
GO:0019731	antibacterial humoral response	1	26	0.153424	0.492335	Sfur000631(SPE)
GO:0046823	negative regulation of nucleocytoplasmic transport	1	26	0.153424	0.492335	Sfur012506(APOD)
GO:0061001	regulation of dendritic spine morphogenesis	1	26	0.153424	0.492335	Sfur002079(PPP1R9A)
GO:0072523	purine-containing compound catabolic process	1	26	0.153424	0.492335	Sfur009447(Uro)
GO:0090398	cellular senescence	1	26	0.153424	0.492335	Sfur010797(Arntl)
GO:1900181	negative regulation of protein localization to nucleus	1	26	0.153424	0.492335	Sfur012506(APOD)
GO:1901658	glycosyl compound catabolic process	1	26	0.153424	0.492335	Sfur009957(Upp1)
GO:0032102	negative regulation of response to external stimulus	2	110	0.155299	0.497234	Sfur006776(ASH1L);Sfur012506(APOD)
GO:0006954	inflammatory response	2	111	0.157532	0.498506	Sfur006776(ASH1L);Sfur012506(APOD)
GO:0007610	behavior	6	575	0.158127	0.498506	MSTRG.16085(Mapre3);Sfur005266(EbpIII);Sfur006059(SLC17A7);Sfur007299(--);Sfur010067(pde-5);Sfur010546(--)
GO:0007154	cell communication	19	2380	0.158635	0.498506	MSTRG.22969(--);Sfur000631(SPE);Sfur001170(IFT27);Sfur002079(PPP1R9A);Sfur003483(Madm);Sfur005310(Ucp2);Sfur005629(Pigu);Sfur005767(ACAA2);Sfur005841(RB1CC1);Sfur006059(SLC17A7);Sfur006776(ASH1L);Sfur007675(Gpr161);Sfur008091(RB1CC1);Sfur008722(PTK7);Sfur009576(SS18L1);Sfur009957(Upp1);Sfur010067(pde-5);Sfur010797(Arntl);Sfur012506(APOD)
GO:0006221	pyrimidine nucleotide biosynthetic process	1	27	0.158838	0.498506	Sfur009957(Upp1)
GO:0006690	icosanoid metabolic process	1	27	0.158838	0.498506	Sfur013239(FAAH2)
GO:0032922	circadian regulation of gene expression	1	27	0.158838	0.498506	Sfur010797(Arntl)
GO:0050880	regulation of blood vessel size	1	27	0.158838	0.498506	Sfur007675(Gpr161)
GO:0071462	cellular response to water stimulus	1	27	0.158838	0.498506	Sfur010546(--)
GO:1901568	fatty acid derivative metabolic process	1	27	0.158838	0.498506	Sfur013239(FAAH2)
GO:0007051	spindle organization	2	112	0.159771	0.500336	MSTRG.16085(Mapre3);Sfur011490(ball)
GO:0030003	cellular cation homeostasis	3	217	0.160241	0.500708	Sfur006059(SLC17A7);Sfur007675(Gpr161);Sfur008868(ATOX1)
GO:0080134	regulation of response to stress	6	578	0.160852	0.501521	Sfur000631(SPE);Sfur005841(RB1CC1);Sfur006776(ASH1L);Sfur008091(RB1CC1);Sfur010797(Arntl);Sfur012506(APOD)
GO:0019098	reproductive behavior	2	113	0.162017	0.504052	Sfur005266(EbpIII);Sfur007299(--)
GO:0006873	cellular ion homeostasis	3	219	0.163327	0.505549	Sfur006059(SLC17A7);Sfur007675(Gpr161);Sfur008868(ATOX1)
GO:0006081	cellular aldehyde metabolic process	1	28	0.164218	0.505549	Sfur006937(LMJF_27_0420)
GO:0006220	pyrimidine nucleotide metabolic process	1	28	0.164218	0.505549	Sfur009957(Upp1)
GO:0060997	dendritic spine morphogenesis	1	28	0.164218	0.505549	Sfur002079(PPP1R9A)
GO:0006814	sodium ion transport	2	114	0.164268	0.505549	Sfur002387(SLC17A5);Sfur010546(--)
GO:0006796	phosphate-containing compound metabolic process	12	1389	0.165001	0.506714	MSTRG.22969(--);Sfur002079(PPP1R9A);Sfur003483(Madm);Sfur003978(PUDP);Sfur005629(Pigu);Sfur005841(RB1CC1);Sfur006776(ASH1L);Sfur006937(LMJF_27_0420);Sfur007675(Gpr161);Sfur008091(RB1CC1);Sfur009957(Upp1);Sfur011490(ball)
GO:0006914	autophagy	3	222	0.16799	0.509762	Sfur005841(RB1CC1);Sfur008091(RB1CC1);Sfur013517(ATG16L1)
GO:0006505	GPI anchor metabolic process	1	29	0.169564	0.509762	Sfur005629(Pigu)
GO:0006506	GPI anchor biosynthetic process	1	29	0.169564	0.509762	Sfur005629(Pigu)
GO:0007200	phospholipase C-activating G-protein coupled receptor signaling pathway	1	29	0.169564	0.509762	Sfur007675(Gpr161)
GO:0019079	viral genome replication	1	29	0.169564	0.509762	Sfur013517(ATG16L1)
GO:0035215	genital disc development	1	29	0.169564	0.509762	Sfur013880(ken)
GO:0042633	hair cycle	1	29	0.169564	0.509762	Sfur010797(Arntl)
GO:0050832	defense response to fungus	1	29	0.169564	0.509762	Sfur000631(SPE)
GO:0051893	regulation of focal adhesion assembly	1	29	0.169564	0.509762	Sfur012506(APOD)
GO:0090109	regulation of cell-substrate junction assembly	1	29	0.169564	0.509762	Sfur012506(APOD)
GO:0060341	regulation of cellular localization	5	463	0.171503	0.51451	Sfur002079(PPP1R9A);Sfur005310(Ucp2);Sfur005767(ACAA2);Sfur010797(Arntl);Sfur012506(APOD)
GO:0031032	actomyosin structure organization	2	118	0.17333	0.516694	Sfur002079(PPP1R9A);Sfur011490(ball)
GO:0003073	regulation of systemic arterial blood pressure	1	30	0.174876	0.516694	Sfur007675(Gpr161)
GO:0033013	tetrapyrrole metabolic process	1	30	0.174876	0.516694	Sfur003398(MMAB)
GO:0042246	tissue regeneration	1	30	0.174876	0.516694	Sfur012506(APOD)
GO:0045752	positive regulation of Toll signaling pathway	1	30	0.174876	0.516694	Sfur000631(SPE)
GO:0045833	negative regulation of lipid metabolic process	1	30	0.174876	0.516694	Sfur012506(APOD)
GO:1901983	regulation of protein acetylation	1	30	0.174876	0.516694	Sfur010797(Arntl)
GO:0006836	neurotransmitter transport	2	119	0.175608	0.516694	Sfur002079(PPP1R9A);Sfur006059(SLC17A7)
GO:0042327	positive regulation of phosphorylation	4	344	0.175679	0.516694	Sfur002079(PPP1R9A);Sfur005841(RB1CC1);Sfur007675(Gpr161);Sfur008091(RB1CC1)
GO:0051223	regulation of protein transport	3	227	0.17585	0.516694	Sfur005310(Ucp2);Sfur010797(Arntl);Sfur012506(APOD)
GO:0015711	organic anion transport	3	228	0.177434	0.519721	MSTRG.32271(CG1139);Sfur000424(CG17119);Sfur006059(SLC17A7)
GO:0019932	second-messenger-mediated signaling	2	120	0.177892	0.519721	Sfur002079(PPP1R9A);Sfur010067(pde-5)
GO:0002225	positive regulation of antimicrobial peptide production	1	31	0.180156	0.519721	Sfur000631(SPE)
GO:0002760	positive regulation of antimicrobial humoral response	1	31	0.180156	0.519721	Sfur000631(SPE)
GO:0002922	positive regulation of humoral immune response	1	31	0.180156	0.519721	Sfur000631(SPE)
GO:0006767	water-soluble vitamin metabolic process	1	31	0.180156	0.519721	Sfur003398(MMAB)
GO:0010812	negative regulation of cell-substrate adhesion	1	31	0.180156	0.519721	Sfur012506(APOD)
GO:0035270	endocrine system development	1	31	0.180156	0.519721	Sfur010797(Arntl)
GO:0070593	dendrite self-avoidance	1	31	0.180156	0.519721	Sfur002163(bdl)
GO:0071702	organic substance transport	11	1274	0.180552	0.519816	MSTRG.32271(CG1139);Sfur000424(CG17119);Sfur001170(IFT27);Sfur003483(Madm);Sfur005310(Ucp2);Sfur006059(SLC17A7);Sfur010797(Arntl);Sfur012506(APOD);Sfur012962(Tret1);Sfur012973(Mipep);Sfur013517(ATG16L1)
GO:0023056	positive regulation of signaling	6	600	0.181461	0.521381	Sfur000631(SPE);Sfur002079(PPP1R9A);Sfur005841(RB1CC1);Sfur007675(Gpr161);Sfur008091(RB1CC1);Sfur010797(Arntl)
GO:0030258	lipid modification	2	122	0.182474	0.523238	Sfur005767(ACAA2);Sfur012506(APOD)
GO:1903034	regulation of response to wounding	2	123	0.184771	0.526349	Sfur006776(ASH1L);Sfur012506(APOD)
GO:0009112	nucleobase metabolic process	1	32	0.185402	0.526349	Sfur009447(Uro)
GO:0051492	regulation of stress fiber assembly	1	32	0.185402	0.526349	Sfur002079(PPP1R9A)
GO:0051568	histone H3-K4 methylation	1	32	0.185402	0.526349	Sfur006776(ASH1L)
GO:1903391	regulation of adherens junction organization	1	32	0.185402	0.526349	Sfur012506(APOD)
GO:0007017	microtubule-based process	5	477	0.186638	0.526494	MSTRG.14617(RANBP1);MSTRG.16085(Mapre3);Sfur001170(IFT27);Sfur009576(SS18L1);Sfur011490(ball)
GO:0010506	regulation of autophagy	2	124	0.187073	0.526494	Sfur005841(RB1CC1);Sfur008091(RB1CC1)
GO:0019220	regulation of phosphate metabolic process	6	608	0.189218	0.526494	MSTRG.22969(--);Sfur002079(PPP1R9A);Sfur005841(RB1CC1);Sfur006776(ASH1L);Sfur007675(Gpr161);Sfur008091(RB1CC1)
GO:0001505	regulation of neurotransmitter levels	2	125	0.18938	0.526494	Sfur002079(PPP1R9A);Sfur006059(SLC17A7)
GO:0044702	single organism reproductive process	8	874	0.189454	0.526494	MSTRG.22969(--);MSTRG.29743(nas-13);Sfur001170(IFT27);Sfur005266(EbpIII);Sfur006776(ASH1L);Sfur010797(Arntl);Sfur011490(ball);Sfur013880(ken)
GO:0032940	secretion by cell	4	355	0.189743	0.526494	Sfur002079(PPP1R9A);Sfur003483(Madm);Sfur005310(Ucp2);Sfur010797(Arntl)
GO:0010647	positive regulation of cell communication	6	609	0.190197	0.526494	Sfur000631(SPE);Sfur002079(PPP1R9A);Sfur005841(RB1CC1);Sfur007675(Gpr161);Sfur008091(RB1CC1);Sfur010797(Arntl)
GO:0051174	regulation of phosphorus metabolic process	6	609	0.190197	0.526494	MSTRG.22969(--);Sfur002079(PPP1R9A);Sfur005841(RB1CC1);Sfur006776(ASH1L);Sfur007675(Gpr161);Sfur008091(RB1CC1)
GO:0016310	phosphorylation	8	875	0.190273	0.526494	MSTRG.22969(--);Sfur002079(PPP1R9A);Sfur003483(Madm);Sfur005841(RB1CC1);Sfur006776(ASH1L);Sfur007675(Gpr161);Sfur008091(RB1CC1);Sfur011490(ball)
GO:0009415	response to water	1	33	0.190615	0.526494	Sfur010546(--)
GO:0031102	neuron projection regeneration	1	33	0.190615	0.526494	Sfur012506(APOD)
GO:0031103	axon regeneration	1	33	0.190615	0.526494	Sfur012506(APOD)
GO:0060079	excitatory postsynaptic potential	1	33	0.190615	0.526494	Sfur002079(PPP1R9A)
GO:1901888	regulation of cell junction assembly	1	33	0.190615	0.526494	Sfur012506(APOD)
GO:0051046	regulation of secretion	3	237	0.191876	0.528195	Sfur002079(PPP1R9A);Sfur005310(Ucp2);Sfur010797(Arntl)
GO:0000226	microtubule cytoskeleton organization	4	357	0.19234	0.528195	MSTRG.14617(RANBP1);MSTRG.16085(Mapre3);Sfur009576(SS18L1);Sfur011490(ball)
GO:0070925	organelle assembly	4	357	0.19234	0.528195	Sfur005841(RB1CC1);Sfur008091(RB1CC1);Sfur011490(ball);Sfur013517(ATG16L1)
GO:0048609	multicellular organismal reproductive process	7	746	0.194883	0.530541	MSTRG.22969(--);Sfur001170(IFT27);Sfur005266(EbpIII);Sfur006776(ASH1L);Sfur007299(--);Sfur010797(Arntl);Sfur011490(ball)
GO:0002775	antimicrobial peptide production	1	34	0.195795	0.530541	Sfur000631(SPE)
GO:0002784	regulation of antimicrobial peptide production	1	34	0.195795	0.530541	Sfur000631(SPE)
GO:0003018	vascular process in circulatory system	1	34	0.195795	0.530541	Sfur007675(Gpr161)
GO:0060998	regulation of dendritic spine development	1	34	0.195795	0.530541	Sfur002079(PPP1R9A)
GO:0070192	chromosome organization involved in meiotic cell cycle	1	34	0.195795	0.530541	Sfur011490(ball)
GO:0097061	dendritic spine organization	1	34	0.195795	0.530541	Sfur002079(PPP1R9A)
GO:0009611	response to wounding	3	240	0.196757	0.531381	MSTRG.16085(Mapre3);Sfur006776(ASH1L);Sfur012506(APOD)
GO:0006793	phosphorus metabolic process	12	1440	0.197464	0.531381	MSTRG.22969(--);Sfur002079(PPP1R9A);Sfur003483(Madm);Sfur003978(PUDP);Sfur005629(Pigu);Sfur005841(RB1CC1);Sfur006776(ASH1L);Sfur006937(LMJF_27_0420);Sfur007675(Gpr161);Sfur008091(RB1CC1);Sfur009957(Upp1);Sfur011490(ball)
GO:0070201	regulation of establishment of protein localization	3	241	0.198391	0.531381	Sfur005310(Ucp2);Sfur010797(Arntl);Sfur012506(APOD)
GO:0001890	placenta development	1	35	0.200942	0.531381	Sfur006776(ASH1L)
GO:0006695	cholesterol biosynthetic process	1	35	0.200942	0.531381	Sfur005767(ACAA2)
GO:0006835	dicarboxylic acid transport	1	35	0.200942	0.531381	Sfur006059(SLC17A7)
GO:0007045	cell-substrate adherens junction assembly	1	35	0.200942	0.531381	Sfur012506(APOD)
GO:0009620	response to fungus	1	35	0.200942	0.531381	Sfur000631(SPE)
GO:0043271	negative regulation of ion transport	1	35	0.200942	0.531381	Sfur010100(BEST3)
GO:0048041	focal adhesion assembly	1	35	0.200942	0.531381	Sfur012506(APOD)
GO:0050805	negative regulation of synaptic transmission	1	35	0.200942	0.531381	Sfur002079(PPP1R9A)
GO:0051453	regulation of intracellular pH	1	35	0.200942	0.531381	Sfur006059(SLC17A7)
GO:1900424	regulation of defense response to bacterium	1	35	0.200942	0.531381	Sfur000631(SPE)
GO:0032504	multicellular organism reproduction	7	754	0.202122	0.533512	MSTRG.22969(--);Sfur001170(IFT27);Sfur005266(EbpIII);Sfur006776(ASH1L);Sfur007299(--);Sfur010797(Arntl);Sfur011490(ball)
GO:0001816	cytokine production	2	131	0.203299	0.534888	Sfur006776(ASH1L);Sfur012506(APOD)
GO:0007267	cell-cell signaling	5	492	0.203392	0.534888	Sfur002079(PPP1R9A);Sfur005310(Ucp2);Sfur006059(SLC17A7);Sfur007675(Gpr161);Sfur010797(Arntl)
GO:0002759	regulation of antimicrobial humoral response	1	36	0.206058	0.536953	Sfur000631(SPE)
GO:0051293	establishment of spindle localization	1	36	0.206058	0.536953	MSTRG.16085(Mapre3)
GO:0051653	spindle localization	1	36	0.206058	0.536953	MSTRG.16085(Mapre3)
GO:0099565	chemical synaptic transmission, postsynaptic	1	36	0.206058	0.536953	Sfur002079(PPP1R9A)
GO:1900006	positive regulation of dendrite development	1	36	0.206058	0.536953	Sfur002079(PPP1R9A)
GO:0007005	mitochondrion organization	4	368	0.206826	0.537449	Sfur005767(ACAA2);Sfur005841(RB1CC1);Sfur008091(RB1CC1);Sfur012973(Mipep)
GO:0005996	monosaccharide metabolic process	2	133	0.207966	0.537449	Sfur006937(LMJF_27_0420);Sfur012506(APOD)
GO:0030534	adult behavior	2	134	0.210304	0.537449	MSTRG.16085(Mapre3);Sfur007299(--)
GO:0002920	regulation of humoral immune response	1	37	0.211141	0.537449	Sfur000631(SPE)
GO:0006635	fatty acid beta-oxidation	1	37	0.211141	0.537449	Sfur005767(ACAA2)
GO:0006885	regulation of pH	1	37	0.211141	0.537449	Sfur006059(SLC17A7)
GO:0007519	skeletal muscle tissue development	1	37	0.211141	0.537449	Sfur010797(Arntl)
GO:0030261	chromosome condensation	1	37	0.211141	0.537449	Sfur011490(ball)
GO:0030641	regulation of cellular pH	1	37	0.211141	0.537449	Sfur006059(SLC17A7)
GO:0030718	germ-line stem cell population maintenance	1	37	0.211141	0.537449	Sfur011490(ball)
GO:0035006	melanization defense response	1	37	0.211141	0.537449	MSTRG.16085(Mapre3)
GO:0060996	dendritic spine development	1	37	0.211141	0.537449	Sfur002079(PPP1R9A)
GO:1903650	negative regulation of cytoplasmic transport	1	37	0.211141	0.537449	Sfur012506(APOD)
GO:0044700	single organism signaling	18	2338	0.213979	0.541849	MSTRG.22969(--);Sfur000631(SPE);Sfur001170(IFT27);Sfur002079(PPP1R9A);Sfur003483(Madm);Sfur005310(Ucp2);Sfur005629(Pigu);Sfur005767(ACAA2);Sfur005841(RB1CC1);Sfur006059(SLC17A7);Sfur006776(ASH1L);Sfur007675(Gpr161);Sfur008091(RB1CC1);Sfur008722(PTK7);Sfur009576(SS18L1);Sfur010067(pde-5);Sfur010797(Arntl);Sfur012506(APOD)
GO:0003333	amino acid transmembrane transport	1	38	0.216192	0.541849	Sfur000424(CG17119)
GO:0006626	protein targeting to mitochondrion	1	38	0.216192	0.541849	Sfur012973(Mipep)
GO:0007044	cell-substrate junction assembly	1	38	0.216192	0.541849	Sfur012506(APOD)
GO:0015766	disaccharide transport	1	38	0.216192	0.541849	Sfur012962(Tret1)
GO:0015771	trehalose transport	1	38	0.216192	0.541849	Sfur012962(Tret1)
GO:0015772	oligosaccharide transport	1	38	0.216192	0.541849	Sfur012962(Tret1)
GO:0046916	cellular transition metal ion homeostasis	1	38	0.216192	0.541849	Sfur008868(ATOX1)
GO:0023052	signaling	18	2342	0.216284	0.541849	MSTRG.22969(--);Sfur000631(SPE);Sfur001170(IFT27);Sfur002079(PPP1R9A);Sfur003483(Madm);Sfur005310(Ucp2);Sfur005629(Pigu);Sfur005767(ACAA2);Sfur005841(RB1CC1);Sfur006059(SLC17A7);Sfur006776(ASH1L);Sfur007675(Gpr161);Sfur008091(RB1CC1);Sfur008722(PTK7);Sfur009576(SS18L1);Sfur010067(pde-5);Sfur010797(Arntl);Sfur012506(APOD)
GO:1901137	carbohydrate derivative biosynthetic process	4	378	0.220273	0.545628	MSTRG.14666(Stt3a);Sfur003978(PUDP);Sfur005629(Pigu);Sfur009957(Upp1)
GO:0001818	negative regulation of cytokine production	1	39	0.221211	0.545628	Sfur012506(APOD)
GO:0006766	vitamin metabolic process	1	39	0.221211	0.545628	Sfur003398(MMAB)
GO:0008637	apoptotic mitochondrial changes	1	39	0.221211	0.545628	Sfur005767(ACAA2)
GO:0042542	response to hydrogen peroxide	1	39	0.221211	0.545628	Sfur010067(pde-5)
GO:0048806	genitalia development	1	39	0.221211	0.545628	Sfur013880(ken)
GO:0010562	positive regulation of phosphorus metabolic process	4	379	0.221631	0.545628	Sfur002079(PPP1R9A);Sfur005841(RB1CC1);Sfur007675(Gpr161);Sfur008091(RB1CC1)
GO:0045937	positive regulation of phosphate metabolic process	4	379	0.221631	0.545628	Sfur002079(PPP1R9A);Sfur005841(RB1CC1);Sfur007675(Gpr161);Sfur008091(RB1CC1)
GO:0051049	regulation of transport	6	641	0.22256	0.545628	Sfur002079(PPP1R9A);Sfur005310(Ucp2);Sfur005767(ACAA2);Sfur010100(BEST3);Sfur010797(Arntl);Sfur012506(APOD)
GO:0015672	monovalent inorganic cation transport	3	257	0.224972	0.545628	Sfur002387(SLC17A5);Sfur005310(Ucp2);Sfur010546(--)
GO:0055086	nucleobase-containing small molecule metabolic process	4	382	0.22572	0.545628	Sfur003978(PUDP);Sfur006937(LMJF_27_0420);Sfur009447(Uro);Sfur009957(Upp1)
GO:0008592	regulation of Toll signaling pathway	1	40	0.226199	0.545628	Sfur000631(SPE)
GO:0016202	regulation of striated muscle tissue development	1	40	0.226199	0.545628	Sfur010797(Arntl)
GO:0031497	chromatin assembly	1	40	0.226199	0.545628	Sfur006024(BAHD1)
GO:0032231	regulation of actin filament bundle assembly	1	40	0.226199	0.545628	Sfur002079(PPP1R9A)
GO:0033559	unsaturated fatty acid metabolic process	1	40	0.226199	0.545628	Sfur013239(FAAH2)
GO:0060078	regulation of postsynaptic membrane potential	1	40	0.226199	0.545628	Sfur002079(PPP1R9A)
GO:0071326	cellular response to monosaccharide stimulus	1	40	0.226199	0.545628	Sfur005310(Ucp2)
GO:0071331	cellular response to hexose stimulus	1	40	0.226199	0.545628	Sfur005310(Ucp2)
GO:0071333	cellular response to glucose stimulus	1	40	0.226199	0.545628	Sfur005310(Ucp2)
GO:0090317	negative regulation of intracellular protein transport	1	40	0.226199	0.545628	Sfur012506(APOD)
GO:1901861	regulation of muscle tissue development	1	40	0.226199	0.545628	Sfur010797(Arntl)
GO:0055080	cation homeostasis	3	258	0.226658	0.545813	Sfur006059(SLC17A7);Sfur007675(Gpr161);Sfur008868(ATOX1)
GO:0006950	response to stress	13	1628	0.227675	0.547341	MSTRG.16085(Mapre3);Sfur000631(SPE);Sfur005310(Ucp2);Sfur005767(ACAA2);Sfur005841(RB1CC1);Sfur006776(ASH1L);Sfur007299(--);Sfur008091(RB1CC1);Sfur008868(ATOX1);Sfur009957(Upp1);Sfur010067(pde-5);Sfur010797(Arntl);Sfur012506(APOD)
GO:0098771	inorganic ion homeostasis	3	259	0.228346	0.548031	Sfur006059(SLC17A7);Sfur007675(Gpr161);Sfur008868(ATOX1)
GO:0010469	regulation of receptor activity	1	41	0.231155	0.551068	MSTRG.22969(--)
GO:0030038	contractile actin filament bundle assembly	1	41	0.231155	0.551068	Sfur002079(PPP1R9A)
GO:0043122	regulation of I-kappaB kinase/NF-kappaB signaling	1	41	0.231155	0.551068	Sfur006776(ASH1L)
GO:0043149	stress fiber assembly	1	41	0.231155	0.551068	Sfur002079(PPP1R9A)
GO:0044707	single-multicellular organism process	24	3273	0.232496	0.553341	MSTRG.14617(RANBP1);MSTRG.16085(Mapre3);MSTRG.22969(--);MSTRG.32769(Ccp84Ab);MSTRG.32778(ACP21);Sfur000881(Lip1);Sfur001170(IFT27);Sfur002079(PPP1R9A);Sfur002163(bdl);Sfur004871(--);Sfur005310(Ucp2);Sfur005841(RB1CC1);Sfur006059(SLC17A7);Sfur006776(ASH1L);Sfur007299(--);Sfur007675(Gpr161);Sfur008091(RB1CC1);Sfur009576(SS18L1);Sfur010067(pde-5);Sfur010546(--);Sfur010797(Arntl);Sfur011490(ball);Sfu…
GO:0007189	adenylate cyclase-activating G-protein coupled receptor signaling pathway	1	42	0.23608	0.555019	Sfur007675(Gpr161)
GO:0009247	glycolipid biosynthetic process	1	42	0.23608	0.555019	Sfur005629(Pigu)
GO:0018107	peptidyl-threonine phosphorylation	1	42	0.23608	0.555019	Sfur011490(ball)
GO:0030317	sperm motility	1	42	0.23608	0.555019	Sfur006776(ASH1L)
GO:0035002	liquid clearance, open tracheal system	1	42	0.23608	0.555019	Sfur010546(--)
GO:0042058	regulation of epidermal growth factor receptor signaling pathway	1	42	0.23608	0.555019	MSTRG.22969(--)
GO:0048678	response to axon injury	1	42	0.23608	0.555019	Sfur012506(APOD)
GO:0007165	signal transduction	16	2083	0.238527	0.555019	MSTRG.22969(--);Sfur000631(SPE);Sfur001170(IFT27);Sfur002079(PPP1R9A);Sfur003483(Madm);Sfur005629(Pigu);Sfur005767(ACAA2);Sfur005841(RB1CC1);Sfur006776(ASH1L);Sfur007675(Gpr161);Sfur008091(RB1CC1);Sfur008722(PTK7);Sfur009576(SS18L1);Sfur010067(pde-5);Sfur010797(Arntl);Sfur012506(APOD)
GO:0007169	transmembrane receptor protein tyrosine kinase signaling pathway	3	266	0.240234	0.555019	MSTRG.22969(--);Sfur009576(SS18L1);Sfur012506(APOD)
GO:0001678	cellular glucose homeostasis	1	43	0.240975	0.555019	Sfur005310(Ucp2)
GO:0002833	positive regulation of response to biotic stimulus	1	43	0.240975	0.555019	Sfur000631(SPE)
GO:0018210	peptidyl-threonine modification	1	43	0.240975	0.555019	Sfur011490(ball)
GO:0019730	antimicrobial humoral response	1	43	0.240975	0.555019	Sfur000631(SPE)
GO:0042073	intraciliary transport	1	43	0.240975	0.555019	Sfur001170(IFT27)
GO:0048634	regulation of muscle organ development	1	43	0.240975	0.555019	Sfur010797(Arntl)
GO:0048660	regulation of smooth muscle cell proliferation	1	43	0.240975	0.555019	Sfur012506(APOD)
GO:0050829	defense response to Gram-negative bacterium	1	43	0.240975	0.555019	Sfur000631(SPE)
GO:0051781	positive regulation of cell division	1	43	0.240975	0.555019	MSTRG.14617(RANBP1)
GO:0098840	protein transport along microtubule	1	43	0.240975	0.555019	Sfur001170(IFT27)
GO:1902653	secondary alcohol biosynthetic process	1	43	0.240975	0.555019	Sfur005767(ACAA2)
GO:0009967	positive regulation of signal transduction	5	527	0.244368	0.560832	Sfur000631(SPE);Sfur005841(RB1CC1);Sfur007675(Gpr161);Sfur008091(RB1CC1);Sfur010797(Arntl)
GO:0019935	cyclic-nucleotide-mediated signaling	1	44	0.245838	0.560832	Sfur010067(pde-5)
GO:0048659	smooth muscle cell proliferation	1	44	0.245838	0.560832	Sfur012506(APOD)
GO:0050730	regulation of peptidyl-tyrosine phosphorylation	1	44	0.245838	0.560832	MSTRG.22969(--)
GO:1901184	regulation of ERBB signaling pathway	1	44	0.245838	0.560832	MSTRG.22969(--)
GO:0048583	regulation of response to stimulus	12	1509	0.245855	0.560832	MSTRG.22969(--);Sfur000631(SPE);Sfur005310(Ucp2);Sfur005629(Pigu);Sfur005767(ACAA2);Sfur005841(RB1CC1);Sfur006776(ASH1L);Sfur007675(Gpr161);Sfur008091(RB1CC1);Sfur010067(pde-5);Sfur010797(Arntl);Sfur012506(APOD)
GO:0002702	positive regulation of production of molecular mediator of immune response	1	45	0.250671	0.566389	Sfur000631(SPE)
GO:0007635	chemosensory behavior	1	45	0.250671	0.566389	Sfur010067(pde-5)
GO:0016126	sterol biosynthetic process	1	45	0.250671	0.566389	Sfur005767(ACAA2)
GO:0045214	sarcomere organization	1	45	0.250671	0.566389	Sfur011490(ball)
GO:0045444	fat cell differentiation	1	45	0.250671	0.566389	Sfur010797(Arntl)
GO:0050900	leukocyte migration	1	45	0.250671	0.566389	Sfur012506(APOD)
GO:0007067	mitotic nuclear division	2	153	0.255133	0.568703	MSTRG.14617(RANBP1);Sfur011490(ball)
GO:0001952	regulation of cell-matrix adhesion	1	46	0.255473	0.568703	Sfur012506(APOD)
GO:0019395	fatty acid oxidation	1	46	0.255473	0.568703	Sfur005767(ACAA2)
GO:0045132	meiotic chromosome segregation	1	46	0.255473	0.568703	Sfur011490(ball)
GO:0045467	R7 cell development	1	46	0.255473	0.568703	Sfur002163(bdl)
GO:0046928	regulation of neurotransmitter secretion	1	46	0.255473	0.568703	Sfur002079(PPP1R9A)
GO:0071322	cellular response to carbohydrate stimulus	1	46	0.255473	0.568703	Sfur005310(Ucp2)
GO:0071456	cellular response to hypoxia	1	46	0.255473	0.568703	Sfur005767(ACAA2)
GO:1902600	hydrogen ion transmembrane transport	1	46	0.255473	0.568703	Sfur005310(Ucp2)
GO:0031347	regulation of defense response	3	275	0.255677	0.568703	Sfur000631(SPE);Sfur006776(ASH1L);Sfur012506(APOD)
GO:0046903	secretion	4	405	0.257699	0.571738	Sfur002079(PPP1R9A);Sfur003483(Madm);Sfur005310(Ucp2);Sfur010797(Arntl)
GO:0006487	protein N-linked glycosylation	1	47	0.260245	0.571738	MSTRG.14666(Stt3a)
GO:0007616	long-term memory	1	47	0.260245	0.571738	Sfur006059(SLC17A7)
GO:0008063	Toll signaling pathway	1	47	0.260245	0.571738	Sfur000631(SPE)
GO:0034333	adherens junction assembly	1	47	0.260245	0.571738	Sfur012506(APOD)
GO:0042306	regulation of protein import into nucleus	1	47	0.260245	0.571738	Sfur012506(APOD)
GO:0043409	negative regulation of MAPK cascade	1	47	0.260245	0.571738	Sfur006776(ASH1L)
GO:0051588	regulation of neurotransmitter transport	1	47	0.260245	0.571738	Sfur002079(PPP1R9A)
GO:0071103	DNA conformation change	2	156	0.262252	0.575262	Sfur006024(BAHD1);Sfur011490(ball)
GO:0001751	compound eye photoreceptor cell differentiation	2	157	0.264626	0.576832	MSTRG.22969(--);Sfur002163(bdl)
GO:0006333	chromatin assembly or disassembly	1	48	0.264987	0.576832	Sfur006024(BAHD1)
GO:0007204	positive regulation of cytosolic calcium ion concentration	1	48	0.264987	0.576832	Sfur007675(Gpr161)
GO:1903825	organic acid transmembrane transport	1	48	0.264987	0.576832	Sfur000424(CG17119)
GO:1904589	regulation of protein import	1	48	0.264987	0.576832	Sfur012506(APOD)
GO:1902533	positive regulation of intracellular signal transduction	3	282	0.267791	0.581768	Sfur005841(RB1CC1);Sfur007675(Gpr161);Sfur008091(RB1CC1)
GO:0007249	I-kappaB kinase/NF-kappaB signaling	1	49	0.269699	0.581768	Sfur006776(ASH1L)
GO:0008217	regulation of blood pressure	1	49	0.269699	0.581768	Sfur007675(Gpr161)
GO:0030004	cellular monovalent inorganic cation homeostasis	1	49	0.269699	0.581768	Sfur006059(SLC17A7)
GO:0042045	epithelial fluid transport	1	49	0.269699	0.581768	Sfur010546(--)
GO:0043588	skin development	1	49	0.269699	0.581768	Sfur006776(ASH1L)
GO:1901700	response to oxygen-containing compound	5	550	0.272475	0.58687	MSTRG.14617(RANBP1);Sfur005310(Ucp2);Sfur010067(pde-5);Sfur010546(--);Sfur012506(APOD)
GO:0042391	regulation of membrane potential	2	161	0.274123	0.588314	Sfur002079(PPP1R9A);Sfur005310(Ucp2)
GO:0072655	establishment of protein localization to mitochondrion	1	50	0.274382	0.588314	Sfur012973(Mipep)
GO:0090263	positive regulation of canonical Wnt signaling pathway	1	50	0.274382	0.588314	Sfur010797(Arntl)
GO:0007623	circadian rhythm	2	162	0.276498	0.591962	Sfur007299(--);Sfur010797(Arntl)
GO:0051649	establishment of localization in cell	10	1260	0.277457	0.593126	MSTRG.16085(Mapre3);Sfur001170(IFT27);Sfur002079(PPP1R9A);Sfur003483(Madm);Sfur005310(Ucp2);Sfur005767(ACAA2);Sfur006059(SLC17A7);Sfur010797(Arntl);Sfur012506(APOD);Sfur012973(Mipep)
GO:0000041	transition metal ion transport	1	51	0.279035	0.593832	Sfur008868(ATOX1)
GO:0008366	axon ensheathment	1	51	0.279035	0.593832	Sfur002163(bdl)
GO:0009062	fatty acid catabolic process	1	51	0.279035	0.593832	Sfur005767(ACAA2)
GO:0015031	protein transport	7	835	0.280863	0.596833	Sfur001170(IFT27);Sfur003483(Madm);Sfur005310(Ucp2);Sfur010797(Arntl);Sfur012506(APOD);Sfur012973(Mipep);Sfur013517(ATG16L1)
GO:0048285	organelle fission	3	291	0.283472	0.598322	MSTRG.14617(RANBP1);Sfur000712(PEX11G);Sfur011490(ball)
GO:0022411	cellular component disassembly	2	165	0.283619	0.598322	Sfur005841(RB1CC1);Sfur008091(RB1CC1)
GO:0007602	phototransduction	1	52	0.283658	0.598322	Sfur010067(pde-5)
GO:0009166	nucleotide catabolic process	1	52	0.283658	0.598322	Sfur009957(Upp1)
GO:0030239	myofibril assembly	1	52	0.283658	0.598322	Sfur011490(ball)
GO:0042981	regulation of apoptotic process	4	426	0.287692	0.601791	Sfur005310(Ucp2);Sfur005767(ACAA2);Sfur005841(RB1CC1);Sfur008091(RB1CC1)
GO:0002700	regulation of production of molecular mediator of immune response	1	53	0.288253	0.601791	Sfur000631(SPE)
GO:0007006	mitochondrial membrane organization	1	53	0.288253	0.601791	Sfur005767(ACAA2)
GO:0007272	ensheathment of neurons	1	53	0.288253	0.601791	Sfur002163(bdl)
GO:0008049	male courtship behavior	1	53	0.288253	0.601791	Sfur007299(--)
GO:0051489	regulation of filopodium assembly	1	53	0.288253	0.601791	Sfur002079(PPP1R9A)
GO:1901292	nucleoside phosphate catabolic process	1	53	0.288253	0.601791	Sfur009957(Upp1)
GO:0050801	ion homeostasis	3	296	0.292224	0.607768	Sfur006059(SLC17A7);Sfur007675(Gpr161);Sfur008868(ATOX1)
GO:0006664	glycolipid metabolic process	1	54	0.292818	0.607768	Sfur005629(Pigu)
GO:0042044	fluid transport	1	54	0.292818	0.607768	Sfur010546(--)
GO:1903828	negative regulation of cellular protein localization	1	54	0.292818	0.607768	Sfur012506(APOD)
GO:0032270	positive regulation of cellular protein metabolic process	5	567	0.293717	0.608749	Sfur002079(PPP1R9A);Sfur005841(RB1CC1);Sfur007675(Gpr161);Sfur008091(RB1CC1);Sfur010797(Arntl)
GO:0044403	symbiosis, encompassing mutualism through parasitism	2	170	0.295476	0.609216	MSTRG.14617(RANBP1);Sfur013517(ATG16L1)
GO:0044419	interspecies interaction between organisms	2	170	0.295476	0.609216	MSTRG.14617(RANBP1);Sfur013517(ATG16L1)
GO:0006661	phosphatidylinositol biosynthetic process	1	55	0.297355	0.609216	Sfur005629(Pigu)
GO:0006959	humoral immune response	1	55	0.297355	0.609216	Sfur000631(SPE)
GO:0015992	proton transport	1	55	0.297355	0.609216	Sfur005310(Ucp2)
GO:0055076	transition metal ion homeostasis	1	55	0.297355	0.609216	Sfur008868(ATOX1)
GO:0070585	protein localization to mitochondrion	1	55	0.297355	0.609216	Sfur012973(Mipep)
GO:1903509	liposaccharide metabolic process	1	55	0.297355	0.609216	Sfur005629(Pigu)
GO:0007569	cell aging	1	56	0.301863	0.615801	Sfur010797(Arntl)
GO:0036294	cellular response to decreased oxygen levels	1	56	0.301863	0.615801	Sfur005767(ACAA2)
GO:0048814	regulation of dendrite morphogenesis	1	56	0.301863	0.615801	Sfur002079(PPP1R9A)
GO:0010817	regulation of hormone levels	2	174	0.304946	0.618753	Sfur005310(Ucp2);Sfur010797(Arntl)
GO:0006818	hydrogen transport	1	57	0.306343	0.618753	Sfur005310(Ucp2)
GO:0009749	response to glucose	1	57	0.306343	0.618753	Sfur005310(Ucp2)
GO:0031503	protein complex localization	1	57	0.306343	0.618753	Sfur001170(IFT27)
GO:0032845	negative regulation of homeostatic process	1	57	0.306343	0.618753	Sfur005310(Ucp2)
GO:0071453	cellular response to oxygen levels	1	57	0.306343	0.618753	Sfur005767(ACAA2)
GO:0072329	monocarboxylic acid catabolic process	1	57	0.306343	0.618753	Sfur005767(ACAA2)
GO:0048878	chemical homeostasis	4	441	0.30945	0.62072	Sfur005310(Ucp2);Sfur006059(SLC17A7);Sfur007675(Gpr161);Sfur008868(ATOX1)
GO:0002066	columnar/cuboidal epithelial cell development	2	176	0.309673	0.62072	MSTRG.22969(--);Sfur010797(Arntl)
GO:0006582	melanin metabolic process	1	58	0.310795	0.62072	MSTRG.16085(Mapre3)
GO:0008016	regulation of heart contraction	1	58	0.310795	0.62072	Sfur007675(Gpr161)
GO:0009156	ribonucleoside monophosphate biosynthetic process	1	58	0.310795	0.62072	Sfur009957(Upp1)
GO:0009746	response to hexose	1	58	0.310795	0.62072	Sfur005310(Ucp2)
GO:0015698	inorganic anion transport	1	58	0.310795	0.62072	Sfur000838(SLC26A11)
GO:0034284	response to monosaccharide	1	58	0.310795	0.62072	Sfur005310(Ucp2)
GO:0044281	small molecule metabolic process	9	1157	0.314651	0.627545	Sfur003398(MMAB);Sfur003978(PUDP);Sfur005767(ACAA2);Sfur006937(LMJF_27_0420);Sfur009447(Uro);Sfur009957(Upp1);Sfur011355(gadl1);Sfur012506(APOD);Sfur013239(FAAH2)
GO:0010639	negative regulation of organelle organization	2	180	0.319111	0.633901	Sfur002079(PPP1R9A);Sfur005767(ACAA2)
GO:0009583	detection of light stimulus	1	60	0.319614	0.633901	Sfur010067(pde-5)
GO:0033002	muscle cell proliferation	1	60	0.319614	0.633901	Sfur012506(APOD)
GO:1990542	mitochondrial transmembrane transport	1	60	0.319614	0.633901	Sfur005310(Ucp2)
GO:0043067	regulation of programmed cell death	4	449	0.321135	0.634929	Sfur005310(Ucp2);Sfur005767(ACAA2);Sfur005841(RB1CC1);Sfur008091(RB1CC1)
GO:0006631	fatty acid metabolic process	2	181	0.321466	0.634929	Sfur005767(ACAA2);Sfur013239(FAAH2)
GO:0050803	regulation of synapse structure or activity	2	181	0.321466	0.634929	Sfur002079(PPP1R9A);Sfur006059(SLC17A7)
GO:0051129	negative regulation of cellular component organization	3	314	0.323881	0.636376	Sfur002079(PPP1R9A);Sfur005767(ACAA2);Sfur012506(APOD)
GO:0006497	protein lipidation	1	61	0.323982	0.636376	Sfur005629(Pigu)
GO:0035249	synaptic transmission, glutamatergic	1	61	0.323982	0.636376	Sfur006059(SLC17A7)
GO:0046847	filopodium assembly	1	61	0.323982	0.636376	Sfur002079(PPP1R9A)
GO:0006812	cation transport	4	452	0.325528	0.637882	Sfur002387(SLC17A5);Sfur005310(Ucp2);Sfur008868(ATOX1);Sfur010546(--)
GO:0006875	cellular metal ion homeostasis	2	183	0.326171	0.637882	Sfur007675(Gpr161);Sfur008868(ATOX1)
GO:0051716	cellular response to stimulus	20	2821	0.327834	0.637882	MSTRG.14617(RANBP1);MSTRG.22969(--);Sfur000631(SPE);Sfur001170(IFT27);Sfur002079(PPP1R9A);Sfur003483(Madm);Sfur005310(Ucp2);Sfur005629(Pigu);Sfur005767(ACAA2);Sfur005841(RB1CC1);Sfur006776(ASH1L);Sfur007675(Gpr161);Sfur008091(RB1CC1);Sfur008722(PTK7);Sfur009576(SS18L1);Sfur009957(Upp1);Sfur010067(pde-5);Sfur010546(--);Sfur010797(Arntl);Sfur012506(APOD)
GO:0007619	courtship behavior	1	62	0.328322	0.637882	Sfur007299(--)
GO:0030336	negative regulation of cell migration	1	62	0.328322	0.637882	Sfur012506(APOD)
GO:0042158	lipoprotein biosynthetic process	1	62	0.328322	0.637882	Sfur005629(Pigu)
GO:0042303	molting cycle	1	62	0.328322	0.637882	Sfur010797(Arntl)
GO:0055067	monovalent inorganic cation homeostasis	1	62	0.328322	0.637882	Sfur006059(SLC17A7)
GO:0045184	establishment of protein localization	7	884	0.332108	0.644363	Sfur001170(IFT27);Sfur003483(Madm);Sfur005310(Ucp2);Sfur010797(Arntl);Sfur012506(APOD);Sfur012973(Mipep);Sfur013517(ATG16L1)
GO:0060538	skeletal muscle organ development	1	63	0.332635	0.644508	Sfur010797(Arntl)
GO:0006996	organelle organization	15	2072	0.334201	0.646666	MSTRG.14617(RANBP1);MSTRG.16085(Mapre3);Sfur000712(PEX11G);Sfur001170(IFT27);Sfur002079(PPP1R9A);Sfur005767(ACAA2);Sfur005841(RB1CC1);Sfur006024(BAHD1);Sfur006059(SLC17A7);Sfur006776(ASH1L);Sfur008091(RB1CC1);Sfur009576(SS18L1);Sfur011490(ball);Sfur012973(Mipep);Sfur013517(ATG16L1)
GO:0002699	positive regulation of immune effector process	1	64	0.33692	0.649288	Sfur000631(SPE)
GO:0030856	regulation of epithelial cell differentiation	1	64	0.33692	0.649288	Sfur010797(Arntl)
GO:0042455	ribonucleoside biosynthetic process	1	64	0.33692	0.649288	Sfur009957(Upp1)
GO:0001754	eye photoreceptor cell differentiation	2	189	0.340239	0.653088	MSTRG.22969(--);Sfur002163(bdl)
GO:0007188	adenylate cyclase-modulating G-protein coupled receptor signaling pathway	1	65	0.341179	0.653088	Sfur007675(Gpr161)
GO:0030177	positive regulation of Wnt signaling pathway	1	65	0.341179	0.653088	Sfur010797(Arntl)
GO:0034332	adherens junction organization	1	65	0.341179	0.653088	Sfur012506(APOD)
GO:1903533	regulation of protein targeting	1	65	0.341179	0.653088	Sfur012506(APOD)
GO:0007049	cell cycle	7	893	0.341714	0.653235	MSTRG.14617(RANBP1);MSTRG.16085(Mapre3);Sfur005841(RB1CC1);Sfur008091(RB1CC1);Sfur010797(Arntl);Sfur011490(ball);Sfur014923(Rabgap1)
GO:0016568	chromatin modification	3	325	0.343273	0.654326	Sfur006024(BAHD1);Sfur006776(ASH1L);Sfur011490(ball)
GO:0051247	positive regulation of protein metabolic process	5	606	0.34349	0.654326	Sfur002079(PPP1R9A);Sfur005841(RB1CC1);Sfur007675(Gpr161);Sfur008091(RB1CC1);Sfur010797(Arntl)
GO:0032501	multicellular organismal process	25	3613	0.343659	0.654326	MSTRG.14617(RANBP1);MSTRG.16085(Mapre3);MSTRG.22969(--);MSTRG.32769(Ccp84Ab);MSTRG.32778(ACP21);Sfur000881(Lip1);Sfur001170(IFT27);Sfur002079(PPP1R9A);Sfur002163(bdl);Sfur004871(--);Sfur005266(EbpIII);Sfur005310(Ucp2);Sfur005841(RB1CC1);Sfur006059(SLC17A7);Sfur006776(ASH1L);Sfur007299(--);Sfur007675(Gpr161);Sfur008091(RB1CC1);Sfur009576(SS18L1);Sfur010067(pde-5);Sfur010546(--);Sfur010797(Arntl);S…
GO:0007162	negative regulation of cell adhesion	1	66	0.345411	0.655042	Sfur012506(APOD)
GO:1903522	regulation of blood circulation	1	66	0.345411	0.655042	Sfur007675(Gpr161)
GO:2000146	negative regulation of cell motility	1	66	0.345411	0.655042	Sfur012506(APOD)
GO:0016055	Wnt signaling pathway	2	193	0.349571	0.658643	Sfur008722(PTK7);Sfur010797(Arntl)
GO:0007052	mitotic spindle organization	1	67	0.349616	0.658643	Sfur011490(ball)
GO:0007160	cell-matrix adhesion	1	67	0.349616	0.658643	Sfur012506(APOD)
GO:0010810	regulation of cell-substrate adhesion	1	67	0.349616	0.658643	Sfur012506(APOD)
GO:0051494	negative regulation of cytoskeleton organization	1	67	0.349616	0.658643	Sfur002079(PPP1R9A)
GO:0051246	regulation of protein metabolic process	8	1048	0.350673	0.659763	MSTRG.22969(--);Sfur002079(PPP1R9A);Sfur005841(RB1CC1);Sfur006776(ASH1L);Sfur007675(Gpr161);Sfur008091(RB1CC1);Sfur010797(Arntl);Sfur012506(APOD)
GO:1901701	cellular response to oxygen-containing compound	3	330	0.352082	0.661544	MSTRG.14617(RANBP1);Sfur005310(Ucp2);Sfur010546(--)
GO:0009124	nucleoside monophosphate biosynthetic process	1	68	0.353794	0.663016	Sfur009957(Upp1)
GO:0060179	male mating behavior	1	68	0.353794	0.663016	Sfur007299(--)
GO:0002440	production of molecular mediator of immune response	1	69	0.357947	0.666425	Sfur000631(SPE)
GO:0007173	epidermal growth factor receptor signaling pathway	1	69	0.357947	0.666425	MSTRG.22969(--)
GO:0007187	G-protein coupled receptor signaling pathway, coupled to cyclic nucleotide second messenger	1	69	0.357947	0.666425	Sfur007675(Gpr161)
GO:0019722	calcium-mediated signaling	1	69	0.357947	0.666425	Sfur002079(PPP1R9A)
GO:1900180	regulation of protein localization to nucleus	1	69	0.357947	0.666425	Sfur012506(APOD)
GO:0030001	metal ion transport	3	334	0.359123	0.667148	Sfur002387(SLC17A5);Sfur008868(ATOX1);Sfur010546(--)
GO:0008203	cholesterol metabolic process	1	70	0.362073	0.667148	Sfur005767(ACAA2)
GO:0009636	response to toxic substance	1	70	0.362073	0.667148	Sfur002079(PPP1R9A)
GO:0032006	regulation of TOR signaling	1	70	0.362073	0.667148	Sfur010797(Arntl)
GO:0034968	histone lysine methylation	1	70	0.362073	0.667148	Sfur006776(ASH1L)
GO:0035725	sodium ion transmembrane transport	1	70	0.362073	0.667148	Sfur010546(--)
GO:0045931	positive regulation of mitotic cell cycle	1	70	0.362073	0.667148	MSTRG.14617(RANBP1)
GO:0050806	positive regulation of synaptic transmission	1	70	0.362073	0.667148	Sfur002079(PPP1R9A)
GO:0035150	regulation of tube size	1	71	0.366172	0.673833	Sfur007675(Gpr161)
GO:0007127	meiosis I	1	72	0.370246	0.676402	Sfur011490(ball)
GO:0007622	rhythmic behavior	1	72	0.370246	0.676402	Sfur007299(--)
GO:0008344	adult locomotory behavior	1	72	0.370246	0.676402	MSTRG.16085(Mapre3)
GO:0046660	female sex differentiation	1	72	0.370246	0.676402	Sfur013880(ken)
GO:0051271	negative regulation of cellular component movement	1	72	0.370246	0.676402	Sfur012506(APOD)
GO:0002065	columnar/cuboidal epithelial cell differentiation	2	202	0.370411	0.676402	MSTRG.22969(--);Sfur010797(Arntl)
GO:0050896	response to stimulus	25	3656	0.371538	0.677564	MSTRG.14617(RANBP1);MSTRG.16085(Mapre3);MSTRG.22969(--);Sfur000631(SPE);Sfur001170(IFT27);Sfur002079(PPP1R9A);Sfur002163(bdl);Sfur003483(Madm);Sfur005266(EbpIII);Sfur005310(Ucp2);Sfur005629(Pigu);Sfur005767(ACAA2);Sfur005841(RB1CC1);Sfur006776(ASH1L);Sfur007299(--);Sfur007675(Gpr161);Sfur008091(RB1CC1);Sfur008722(PTK7);Sfur008868(ATOX1);Sfur009576(SS18L1);Sfur009957(Upp1);Sfur010067(pde-5);Sfur01…
GO:0009056	catabolic process	9	1218	0.372015	0.677564	Sfur000881(Lip1);Sfur005767(ACAA2);Sfur005841(RB1CC1);Sfur006937(LMJF_27_0420);Sfur008091(RB1CC1);Sfur009447(Uro);Sfur009957(Upp1);Sfur010797(Arntl);Sfur013239(FAAH2)
GO:0051641	cellular localization	11	1518	0.37247	0.677564	MSTRG.16085(Mapre3);Sfur001170(IFT27);Sfur002079(PPP1R9A);Sfur003483(Madm);Sfur005310(Ucp2);Sfur005629(Pigu);Sfur005767(ACAA2);Sfur006059(SLC17A7);Sfur010797(Arntl);Sfur012506(APOD);Sfur012973(Mipep)
GO:0042335	cuticle development	1	73	0.374295	0.680016	MSTRG.32769(Ccp84Ab)
GO:0044270	cellular nitrogen compound catabolic process	2	205	0.377303	0.684611	Sfur009447(Uro);Sfur009957(Upp1)
GO:0018022	peptidyl-lysine methylation	1	74	0.378317	0.684711	Sfur006776(ASH1L)
GO:0046467	membrane lipid biosynthetic process	1	74	0.378317	0.684711	Sfur005629(Pigu)
GO:0045859	regulation of protein kinase activity	2	207	0.381882	0.687589	MSTRG.22969(--);Sfur002079(PPP1R9A)
GO:0032880	regulation of protein localization	3	347	0.381938	0.687589	Sfur005310(Ucp2);Sfur010797(Arntl);Sfur012506(APOD)
GO:0032869	cellular response to insulin stimulus	1	75	0.382315	0.687589	Sfur005310(Ucp2)
GO:0046822	regulation of nucleocytoplasmic transport	1	75	0.382315	0.687589	Sfur012506(APOD)
GO:0051480	regulation of cytosolic calcium ion concentration	1	75	0.382315	0.687589	Sfur007675(Gpr161)
GO:0009117	nucleotide metabolic process	3	348	0.383688	0.688088	Sfur003978(PUDP);Sfur006937(LMJF_27_0420);Sfur009957(Upp1)
GO:0046530	photoreceptor cell differentiation	2	208	0.384166	0.688088	MSTRG.22969(--);Sfur002163(bdl)
GO:0006694	steroid biosynthetic process	1	76	0.386287	0.688088	Sfur005767(ACAA2)
GO:0031929	TOR signaling	1	76	0.386287	0.688088	Sfur010797(Arntl)
GO:0038127	ERBB signaling pathway	1	76	0.386287	0.688088	MSTRG.22969(--)
GO:0048167	regulation of synaptic plasticity	1	76	0.386287	0.688088	Sfur002079(PPP1R9A)
GO:0048872	homeostasis of number of cells	1	76	0.386287	0.688088	Sfur003483(Madm)
GO:0046700	heterocycle catabolic process	2	209	0.386447	0.688088	Sfur009447(Uro);Sfur009957(Upp1)
GO:0006888	ER to Golgi vesicle-mediated transport	1	77	0.390234	0.689598	Sfur003483(Madm)
GO:0008340	determination of adult lifespan	1	77	0.390234	0.689598	Sfur010067(pde-5)
GO:0018108	peptidyl-tyrosine phosphorylation	1	77	0.390234	0.689598	MSTRG.22969(--)
GO:0019748	secondary metabolic process	1	77	0.390234	0.689598	MSTRG.16085(Mapre3)
GO:0045466	R7 cell differentiation	1	77	0.390234	0.689598	Sfur002163(bdl)
GO:0060047	heart contraction	1	77	0.390234	0.689598	Sfur007675(Gpr161)
GO:0006753	nucleoside phosphate metabolic process	3	352	0.390676	0.689598	Sfur003978(PUDP);Sfur006937(LMJF_27_0420);Sfur009957(Upp1)
GO:1902589	single-organism organelle organization	11	1542	0.393426	0.690619	MSTRG.14617(RANBP1);MSTRG.16085(Mapre3);Sfur001170(IFT27);Sfur002079(PPP1R9A);Sfur005767(ACAA2);Sfur005841(RB1CC1);Sfur006059(SLC17A7);Sfur006776(ASH1L);Sfur008091(RB1CC1);Sfur009576(SS18L1);Sfur011490(ball)
GO:1901135	carbohydrate derivative metabolic process	5	645	0.393981	0.690619	MSTRG.14666(Stt3a);Sfur003978(PUDP);Sfur005629(Pigu);Sfur006937(LMJF_27_0420);Sfur009957(Upp1)
GO:0009743	response to carbohydrate	1	78	0.394156	0.690619	Sfur005310(Ucp2)
GO:0040013	negative regulation of locomotion	1	78	0.394156	0.690619	Sfur012506(APOD)
GO:0046661	male sex differentiation	1	78	0.394156	0.690619	Sfur013880(ken)
GO:1902652	secondary alcohol metabolic process	1	78	0.394156	0.690619	Sfur005767(ACAA2)
GO:0080135	regulation of cellular response to stress	3	357	0.399387	0.698911	Sfur005841(RB1CC1);Sfur008091(RB1CC1);Sfur010797(Arntl)
GO:0006006	glucose metabolic process	1	80	0.401925	0.698911	Sfur012506(APOD)
GO:0007088	regulation of mitotic nuclear division	1	80	0.401925	0.698911	MSTRG.14617(RANBP1)
GO:0018212	peptidyl-tyrosine modification	1	80	0.401925	0.698911	MSTRG.22969(--)
GO:0042752	regulation of circadian rhythm	1	80	0.401925	0.698911	Sfur010797(Arntl)
GO:0090068	positive regulation of cell cycle process	1	80	0.401925	0.698911	MSTRG.14617(RANBP1)
GO:0032386	regulation of intracellular transport	2	216	0.402314	0.698911	Sfur005767(ACAA2);Sfur012506(APOD)
GO:0006952	defense response	4	506	0.404936	0.701325	MSTRG.16085(Mapre3);Sfur000631(SPE);Sfur006776(ASH1L);Sfur012506(APOD)
GO:0016125	sterol metabolic process	1	81	0.405773	0.701325	Sfur005767(ACAA2)
GO:0046165	alcohol biosynthetic process	1	81	0.405773	0.701325	Sfur005767(ACAA2)
GO:0051017	actin filament bundle assembly	1	81	0.405773	0.701325	Sfur002079(PPP1R9A)
GO:0019439	aromatic compound catabolic process	2	218	0.406814	0.701325	Sfur009447(Uro);Sfur009957(Upp1)
GO:0010941	regulation of cell death	4	508	0.407866	0.701325	Sfur005310(Ucp2);Sfur005767(ACAA2);Sfur005841(RB1CC1);Sfur008091(RB1CC1)
GO:0001745	compound eye morphogenesis	2	219	0.409058	0.701325	MSTRG.22969(--);Sfur002163(bdl)
GO:0048511	rhythmic process	2	219	0.409058	0.701325	Sfur007299(--);Sfur010797(Arntl)
GO:0055065	metal ion homeostasis	2	219	0.409058	0.701325	Sfur007675(Gpr161);Sfur008868(ATOX1)
GO:1901565	organonitrogen compound catabolic process	2	219	0.409058	0.701325	Sfur009447(Uro);Sfur009957(Upp1)
GO:0007156	homophilic cell adhesion via plasma membrane adhesion molecules	1	82	0.409597	0.701325	Sfur002163(bdl)
GO:0008643	carbohydrate transport	1	82	0.409597	0.701325	Sfur012962(Tret1)
GO:0048608	reproductive structure development	2	220	0.411298	0.702553	Sfur006776(ASH1L);Sfur013880(ken)
GO:0061458	reproductive system development	2	220	0.411298	0.702553	Sfur006776(ASH1L);Sfur013880(ken)
GO:0007297	ovarian follicle cell migration	1	83	0.413397	0.703847	MSTRG.22969(--)
GO:0050773	regulation of dendrite development	1	83	0.413397	0.703847	Sfur002079(PPP1R9A)
GO:0009116	nucleoside metabolic process	2	221	0.413535	0.703847	Sfur003978(PUDP);Sfur009957(Upp1)
GO:0048856	anatomical structure development	20	2947	0.414796	0.705153	MSTRG.14617(RANBP1);MSTRG.16085(Mapre3);MSTRG.22969(--);MSTRG.32769(Ccp84Ab);MSTRG.32778(ACP21);Sfur001170(IFT27);Sfur002079(PPP1R9A);Sfur002163(bdl);Sfur005266(EbpIII);Sfur005310(Ucp2);Sfur005841(RB1CC1);Sfur006776(ASH1L);Sfur008091(RB1CC1);Sfur008722(PTK7);Sfur009576(SS18L1);Sfur010546(--);Sfur010797(Arntl);Sfur011490(ball);Sfur012506(APOD);Sfur013880(ken)
GO:0019058	viral life cycle	1	84	0.417172	0.707152	Sfur013517(ATG16L1)
GO:0061572	actin filament bundle organization	1	84	0.417172	0.707152	Sfur002079(PPP1R9A)
GO:0006606	protein import into nucleus	1	85	0.420924	0.707152	Sfur012506(APOD)
GO:0007269	neurotransmitter secretion	1	85	0.420924	0.707152	Sfur002079(PPP1R9A)
GO:0044744	protein targeting to nucleus	1	85	0.420924	0.707152	Sfur012506(APOD)
GO:0046425	regulation of JAK-STAT cascade	1	85	0.420924	0.707152	Sfur005629(Pigu)
GO:0051963	regulation of synapse assembly	1	85	0.420924	0.707152	Sfur002079(PPP1R9A)
GO:0071375	cellular response to peptide hormone stimulus	1	85	0.420924	0.707152	Sfur005310(Ucp2)
GO:1902593	single-organism nuclear import	1	85	0.420924	0.707152	Sfur012506(APOD)
GO:1904892	regulation of STAT cascade	1	85	0.420924	0.707152	Sfur005629(Pigu)
GO:0009581	detection of external stimulus	1	86	0.424652	0.710074	Sfur010067(pde-5)
GO:0016571	histone methylation	1	86	0.424652	0.710074	Sfur006776(ASH1L)
GO:0030833	regulation of actin filament polymerization	1	86	0.424652	0.710074	Sfur002079(PPP1R9A)
GO:0042593	glucose homeostasis	1	86	0.424652	0.710074	Sfur005310(Ucp2)
GO:0032268	regulation of cellular protein metabolic process	7	971	0.426136	0.711722	MSTRG.22969(--);Sfur002079(PPP1R9A);Sfur005841(RB1CC1);Sfur006776(ASH1L);Sfur007675(Gpr161);Sfur008091(RB1CC1);Sfur010797(Arntl)
GO:0003015	heart process	1	87	0.428356	0.712766	Sfur007675(Gpr161)
GO:0009582	detection of abiotic stimulus	1	87	0.428356	0.712766	Sfur010067(pde-5)
GO:0032868	response to insulin	1	87	0.428356	0.712766	Sfur005310(Ucp2)
GO:0072358	cardiovascular system development	3	374	0.428758	0.712766	Sfur005841(RB1CC1);Sfur008091(RB1CC1);Sfur012506(APOD)
GO:0072359	circulatory system development	3	375	0.430472	0.714784	Sfur005841(RB1CC1);Sfur008091(RB1CC1);Sfur012506(APOD)
GO:0010970	establishment of localization by movement along microtubule	1	88	0.432037	0.715351	Sfur001170(IFT27)
GO:0099531	presynaptic process involved in synaptic transmission	1	88	0.432037	0.715351	Sfur002079(PPP1R9A)
GO:1901361	organic cyclic compound catabolic process	2	230	0.433476	0.715351	Sfur009447(Uro);Sfur009957(Upp1)
GO:0044723	single-organism carbohydrate metabolic process	3	378	0.435604	0.715351	MSTRG.14666(Stt3a);Sfur006937(LMJF_27_0420);Sfur012506(APOD)
GO:0072594	establishment of protein localization to organelle	2	231	0.43567	0.715351	Sfur012506(APOD);Sfur012973(Mipep)
GO:0007617	mating behavior	1	89	0.435695	0.715351	Sfur007299(--)
GO:0051170	nuclear import	1	89	0.435695	0.715351	Sfur012506(APOD)
GO:0051783	regulation of nuclear division	1	89	0.435695	0.715351	MSTRG.14617(RANBP1)
GO:0033993	response to lipid	2	232	0.43786	0.715351	MSTRG.14617(RANBP1);Sfur005310(Ucp2)
GO:0008064	regulation of actin polymerization or depolymerization	1	90	0.43933	0.715351	Sfur002079(PPP1R9A)
GO:0010821	regulation of mitochondrion organization	1	90	0.43933	0.715351	Sfur005767(ACAA2)
GO:0030832	regulation of actin filament length	1	90	0.43933	0.715351	Sfur002079(PPP1R9A)
GO:0033057	multicellular organism reproductive behavior	1	90	0.43933	0.715351	Sfur007299(--)
GO:0034599	cellular response to oxidative stress	1	90	0.43933	0.715351	Sfur010797(Arntl)
GO:0042051	compound eye photoreceptor development	1	90	0.43933	0.715351	Sfur002163(bdl)
GO:0044724	single-organism carbohydrate catabolic process	1	90	0.43933	0.715351	Sfur006937(LMJF_27_0420)
GO:0050954	sensory perception of mechanical stimulus	1	90	0.43933	0.715351	MSTRG.16085(Mapre3)
GO:0044255	cellular lipid metabolic process	4	531	0.441369	0.717659	Sfur005629(Pigu);Sfur005767(ACAA2);Sfur012506(APOD);Sfur013239(FAAH2)
GO:0006464	cellular protein modification process	12	1751	0.442255	0.717659	MSTRG.14666(Stt3a);MSTRG.22969(--);Sfur001080(Ppig);Sfur002079(PPP1R9A);Sfur003483(Madm);Sfur005629(Pigu);Sfur005841(RB1CC1);Sfur006776(ASH1L);Sfur007675(Gpr161);Sfur008091(RB1CC1);Sfur010797(Arntl);Sfur011490(ball)
GO:0036211	protein modification process	12	1751	0.442255	0.717659	MSTRG.14666(Stt3a);MSTRG.22969(--);Sfur001080(Ppig);Sfur002079(PPP1R9A);Sfur003483(Madm);Sfur005629(Pigu);Sfur005841(RB1CC1);Sfur006776(ASH1L);Sfur007675(Gpr161);Sfur008091(RB1CC1);Sfur010797(Arntl);Sfur011490(ball)
GO:0001822	kidney development	1	92	0.44653	0.723773	Sfur001170(IFT27)
GO:1901657	glycosyl compound metabolic process	2	237	0.448744	0.723802	Sfur003978(PUDP);Sfur009957(Upp1)
GO:0007259	JAK-STAT cascade	1	93	0.450096	0.723802	Sfur005629(Pigu)
GO:0030041	actin filament polymerization	1	93	0.450096	0.723802	Sfur002079(PPP1R9A)
GO:0046488	phosphatidylinositol metabolic process	1	93	0.450096	0.723802	Sfur005629(Pigu)
GO:0060491	regulation of cell projection assembly	1	93	0.450096	0.723802	Sfur002079(PPP1R9A)
GO:0060828	regulation of canonical Wnt signaling pathway	1	93	0.450096	0.723802	Sfur010797(Arntl)
GO:0097696	STAT cascade	1	93	0.450096	0.723802	Sfur005629(Pigu)
GO:0045087	innate immune response	2	238	0.450907	0.724291	MSTRG.16085(Mapre3);Sfur000631(SPE)
GO:0046474	glycerophospholipid biosynthetic process	1	94	0.453639	0.727044	Sfur005629(Pigu)
GO:0098656	anion transmembrane transport	1	94	0.453639	0.727044	Sfur000424(CG17119)
GO:0044767	single-organism developmental process	22	3314	0.455099	0.728567	MSTRG.14617(RANBP1);MSTRG.16085(Mapre3);MSTRG.22969(--);MSTRG.32769(Ccp84Ab);MSTRG.32778(ACP21);Sfur001170(IFT27);Sfur002079(PPP1R9A);Sfur002163(bdl);Sfur005266(EbpIII);Sfur005310(Ucp2);Sfur005841(RB1CC1);Sfur006059(SLC17A7);Sfur006776(ASH1L);Sfur008091(RB1CC1);Sfur008722(PTK7);Sfur009576(SS18L1);Sfur010067(pde-5);Sfur010546(--);Sfur010797(Arntl);Sfur011490(ball);Sfur012506(APOD);Sfur013880(ken)
GO:0010259	multicellular organism aging	1	95	0.45716	0.729413	Sfur010067(pde-5)
GO:0033500	carbohydrate homeostasis	1	95	0.45716	0.729413	Sfur005310(Ucp2)
GO:0046496	nicotinamide nucleotide metabolic process	1	95	0.45716	0.729413	Sfur006937(LMJF_27_0420)
GO:0002064	epithelial cell development	2	242	0.459513	0.731532	MSTRG.22969(--);Sfur010797(Arntl)
GO:0007283	spermatogenesis	2	242	0.459513	0.731532	Sfur001170(IFT27);Sfur010797(Arntl)
GO:0001752	compound eye photoreceptor fate commitment	1	96	0.460659	0.731725	MSTRG.22969(--)
GO:0019362	pyridine nucleotide metabolic process	1	96	0.460659	0.731725	Sfur006937(LMJF_27_0420)
GO:0033554	cellular response to stress	7	1004	0.461886	0.732859	Sfur005310(Ucp2);Sfur005767(ACAA2);Sfur005841(RB1CC1);Sfur008091(RB1CC1);Sfur009957(Upp1);Sfur010797(Arntl);Sfur012506(APOD)
GO:0010975	regulation of neuron projection development	2	244	0.463787	0.733981	MSTRG.14617(RANBP1);Sfur002079(PPP1R9A)
GO:0006338	chromatin remodeling	1	97	0.464135	0.733981	Sfur006024(BAHD1)
GO:1901653	cellular response to peptide	1	97	0.464135	0.733981	Sfur005310(Ucp2)
GO:0043549	regulation of kinase activity	2	245	0.465918	0.73596	MSTRG.22969(--);Sfur002079(PPP1R9A)
GO:0006629	lipid metabolic process	5	702	0.467335	0.73596	Sfur000881(Lip1);Sfur005629(Pigu);Sfur005767(ACAA2);Sfur012506(APOD);Sfur013239(FAAH2)
GO:0042706	eye photoreceptor cell fate commitment	1	98	0.467589	0.73596	MSTRG.22969(--)
GO:0009628	response to abiotic stimulus	4	550	0.468675	0.73596	Sfur005310(Ucp2);Sfur005767(ACAA2);Sfur010067(pde-5);Sfur010546(--)
GO:0007167	enzyme linked receptor protein signaling pathway	3	398	0.469387	0.73596	MSTRG.22969(--);Sfur009576(SS18L1);Sfur012506(APOD)
GO:0007507	heart development	2	247	0.470164	0.73596	Sfur005841(RB1CC1);Sfur008091(RB1CC1)
GO:0007613	memory	1	99	0.471022	0.73596	Sfur006059(SLC17A7)
GO:0008154	actin polymerization or depolymerization	1	99	0.471022	0.73596	Sfur002079(PPP1R9A)
GO:0042440	pigment metabolic process	1	99	0.471022	0.73596	MSTRG.16085(Mapre3)
GO:0072524	pyridine-containing compound metabolic process	1	99	0.471022	0.73596	Sfur006937(LMJF_27_0420)
GO:0022607	cellular component assembly	9	1321	0.471056	0.73596	MSTRG.16085(Mapre3);Sfur002079(PPP1R9A);Sfur005841(RB1CC1);Sfur006024(BAHD1);Sfur008091(RB1CC1);Sfur009541(GF10347);Sfur011490(ball);Sfur012506(APOD);Sfur013517(ATG16L1)
GO:0006605	protein targeting	2	248	0.47228	0.737066	Sfur012506(APOD);Sfur012973(Mipep)
GO:0048749	compound eye development	2	249	0.47439	0.737204	MSTRG.22969(--);Sfur002163(bdl)
GO:0032271	regulation of protein polymerization	1	100	0.474433	0.737204	Sfur002079(PPP1R9A)
GO:0034250	positive regulation of cellular amide metabolic process	1	100	0.474433	0.737204	Sfur000631(SPE)
GO:0046434	organophosphate catabolic process	1	100	0.474433	0.737204	Sfur009957(Upp1)
GO:0006325	chromatin organization	3	402	0.476044	0.738452	Sfur006024(BAHD1);Sfur006776(ASH1L);Sfur011490(ball)
GO:0006479	protein methylation	1	101	0.477822	0.738452	Sfur006776(ASH1L)
GO:0008213	protein alkylation	1	101	0.477822	0.738452	Sfur006776(ASH1L)
GO:0055002	striated muscle cell development	1	101	0.477822	0.738452	Sfur011490(ball)
GO:1901136	carbohydrate derivative catabolic process	1	101	0.477822	0.738452	Sfur009957(Upp1)
GO:0048232	male gamete generation	2	252	0.480694	0.739655	Sfur001170(IFT27);Sfur010797(Arntl)
GO:0050767	regulation of neurogenesis	3	405	0.481014	0.739655	MSTRG.14617(RANBP1);Sfur002079(PPP1R9A);Sfur010797(Arntl)
GO:0018958	phenol-containing compound metabolic process	1	102	0.48119	0.739655	MSTRG.16085(Mapre3)
GO:0044705	multi-organism reproductive behavior	1	102	0.48119	0.739655	Sfur007299(--)
GO:0098742	cell-cell adhesion via plasma-membrane adhesion molecules	1	102	0.48119	0.739655	Sfur002163(bdl)
GO:0032502	developmental process	22	3353	0.482418	0.740745	MSTRG.14617(RANBP1);MSTRG.16085(Mapre3);MSTRG.22969(--);MSTRG.32769(Ccp84Ab);MSTRG.32778(ACP21);Sfur001170(IFT27);Sfur002079(PPP1R9A);Sfur002163(bdl);Sfur005266(EbpIII);Sfur005310(Ucp2);Sfur005841(RB1CC1);Sfur006059(SLC17A7);Sfur006776(ASH1L);Sfur008091(RB1CC1);Sfur008722(PTK7);Sfur009576(SS18L1);Sfur010067(pde-5);Sfur010546(--);Sfur010797(Arntl);Sfur011490(ball);Sfur012506(APOD);Sfur013880(ken)
GO:0018193	peptidyl-amino acid modification	4	561	0.484286	0.741605	MSTRG.22969(--);Sfur001080(Ppig);Sfur006776(ASH1L);Sfur011490(ball)
GO:0006643	membrane lipid metabolic process	1	103	0.484536	0.741605	Sfur005629(Pigu)
GO:0030705	cytoskeleton-dependent intracellular transport	1	103	0.484536	0.741605	Sfur001170(IFT27)
GO:0098662	inorganic cation transmembrane transport	2	255	0.486952	0.744505	Sfur005310(Ucp2);Sfur010546(--)
GO:0007270	neuron-neuron synaptic transmission	1	104	0.487861	0.744569	Sfur006059(SLC17A7)
GO:0019538	protein metabolic process	17	2585	0.489873	0.744569	MSTRG.14666(Stt3a);MSTRG.22969(--);MSTRG.29743(nas-13);Sfur000631(SPE);Sfur001080(Ppig);Sfur002079(PPP1R9A);Sfur003483(Madm);Sfur005629(Pigu);Sfur005841(RB1CC1);Sfur006776(ASH1L);Sfur007675(Gpr161);Sfur008091(RB1CC1);Sfur010797(Arntl);Sfur011490(ball);Sfur011940(DppIII);Sfur012506(APOD);Sfur012973(Mipep)
GO:0034220	ion transmembrane transport	3	411	0.49089	0.744569	Sfur000424(CG17119);Sfur005310(Ucp2);Sfur010546(--)
GO:0000280	nuclear division	2	257	0.491099	0.744569	MSTRG.14617(RANBP1);Sfur011490(ball)
GO:0031589	cell-substrate adhesion	1	105	0.491166	0.744569	Sfur012506(APOD)
GO:0043902	positive regulation of multi-organism process	1	105	0.491166	0.744569	Sfur000631(SPE)
GO:0046552	photoreceptor cell fate commitment	1	105	0.491166	0.744569	MSTRG.22969(--)
GO:0099504	synaptic vesicle cycle	1	105	0.491166	0.744569	Sfur006059(SLC17A7)
GO:0007010	cytoskeleton organization	5	723	0.493831	0.747167	MSTRG.14617(RANBP1);MSTRG.16085(Mapre3);Sfur002079(PPP1R9A);Sfur009576(SS18L1);Sfur011490(ball)
GO:0000070	mitotic sister chromatid segregation	1	106	0.494449	0.747167	Sfur011490(ball)
GO:0010038	response to metal ion	1	106	0.494449	0.747167	MSTRG.14617(RANBP1)
GO:0006733	oxidoreduction coenzyme metabolic process	1	107	0.497711	0.749717	Sfur006937(LMJF_27_0420)
GO:0007224	smoothened signaling pathway	1	107	0.497711	0.749717	Sfur001170(IFT27)
GO:0055001	muscle cell development	1	107	0.497711	0.749717	Sfur011490(ball)
GO:0002683	negative regulation of immune system process	1	108	0.500953	0.752857	Sfur012506(APOD)
GO:0031349	positive regulation of defense response	1	108	0.500953	0.752857	Sfur000631(SPE)
GO:0016570	histone modification	2	262	0.501378	0.752857	Sfur006776(ASH1L);Sfur011490(ball)
GO:0040011	locomotion	6	886	0.502574	0.75386	MSTRG.22969(--);Sfur002163(bdl);Sfur006776(ASH1L);Sfur010067(pde-5);Sfur011490(ball);Sfur012506(APOD)
GO:0034329	cell junction assembly	1	109	0.504174	0.755467	Sfur012506(APOD)
GO:0008104	protein localization	8	1201	0.505544	0.756457	Sfur001170(IFT27);Sfur003483(Madm);Sfur005310(Ucp2);Sfur005629(Pigu);Sfur010797(Arntl);Sfur012506(APOD);Sfur012973(Mipep);Sfur013517(ATG16L1)
GO:0007126	meiotic nuclear division	1	110	0.507375	0.756457	Sfur011490(ball)
GO:0042742	defense response to bacterium	1	110	0.507375	0.756457	Sfur000631(SPE)
GO:0050807	regulation of synapse organization	1	110	0.507375	0.756457	Sfur002079(PPP1R9A)
GO:0016569	covalent chromatin modification	2	265	0.507483	0.756457	Sfur006776(ASH1L);Sfur011490(ball)
GO:0009260	ribonucleotide biosynthetic process	1	111	0.510555	0.75866	Sfur009957(Upp1)
GO:0032103	positive regulation of response to external stimulus	1	111	0.510555	0.75866	Sfur000631(SPE)
GO:0060070	canonical Wnt signaling pathway	1	111	0.510555	0.75866	Sfur010797(Arntl)
GO:0065008	regulation of biological quality	11	1676	0.511244	0.758894	Sfur000712(PEX11G);Sfur002079(PPP1R9A);Sfur003483(Madm);Sfur005310(Ucp2);Sfur005767(ACAA2);Sfur005841(RB1CC1);Sfur006059(SLC17A7);Sfur007675(Gpr161);Sfur008091(RB1CC1);Sfur008868(ATOX1);Sfur010797(Arntl)
GO:0070887	cellular response to chemical stimulus	6	895	0.512797	0.760409	MSTRG.14617(RANBP1);Sfur002079(PPP1R9A);Sfur005310(Ucp2);Sfur005767(ACAA2);Sfur010546(--);Sfur010797(Arntl)
GO:0042462	eye photoreceptor cell development	1	112	0.513715	0.760981	Sfur002163(bdl)
GO:0019693	ribose phosphate metabolic process	2	269	0.51555	0.762907	Sfur006937(LMJF_27_0420);Sfur009957(Upp1)
GO:0014706	striated muscle tissue development	1	113	0.516855	0.762975	Sfur010797(Arntl)
GO:0046390	ribose phosphate biosynthetic process	1	113	0.516855	0.762975	Sfur009957(Upp1)
GO:0006082	organic acid metabolic process	4	585	0.517741	0.762975	Sfur005767(ACAA2);Sfur009447(Uro);Sfur011355(gadl1);Sfur013239(FAAH2)
GO:0042592	homeostatic process	5	743	0.518657	0.762975	Sfur003483(Madm);Sfur005310(Ucp2);Sfur006059(SLC17A7);Sfur007675(Gpr161);Sfur008868(ATOX1)
GO:0001817	regulation of cytokine production	1	114	0.519976	0.762975	Sfur012506(APOD)
GO:0006473	protein acetylation	1	114	0.519976	0.762975	Sfur010797(Arntl)
GO:0045017	glycerolipid biosynthetic process	1	114	0.519976	0.762975	Sfur005629(Pigu)
GO:0071396	cellular response to lipid	1	114	0.519976	0.762975	MSTRG.14617(RANBP1)
GO:1901575	organic substance catabolic process	7	1059	0.520497	0.762975	Sfur000881(Lip1);Sfur005767(ACAA2);Sfur006937(LMJF_27_0420);Sfur009447(Uro);Sfur009957(Upp1);Sfur010797(Arntl);Sfur013239(FAAH2)
GO:1902582	single-organism intracellular transport	6	904	0.52295	0.762975	Sfur001170(IFT27);Sfur003483(Madm);Sfur005310(Ucp2);Sfur005767(ACAA2);Sfur012506(APOD);Sfur012973(Mipep)
GO:0000819	sister chromatid segregation	1	115	0.523076	0.762975	Sfur011490(ball)
GO:0001525	angiogenesis	1	115	0.523076	0.762975	Sfur012506(APOD)
GO:0019318	hexose metabolic process	1	115	0.523076	0.762975	Sfur012506(APOD)
GO:0045787	positive regulation of cell cycle	1	115	0.523076	0.762975	MSTRG.14617(RANBP1)
GO:0032787	monocarboxylic acid metabolic process	2	274	0.525514	0.764599	Sfur005767(ACAA2);Sfur013239(FAAH2)
GO:0009266	response to temperature stimulus	1	116	0.526157	0.764599	Sfur005310(Ucp2)
GO:0060537	muscle tissue development	1	116	0.526157	0.764599	Sfur010797(Arntl)
GO:0048589	developmental growth	3	433	0.526331	0.764599	Sfur002163(bdl);Sfur008722(PTK7);Sfur012506(APOD)
GO:0006457	protein folding	1	117	0.529218	0.767232	Sfur001080(Ppig)
GO:0016052	carbohydrate catabolic process	1	117	0.529218	0.767232	Sfur006937(LMJF_27_0420)
GO:0019637	organophosphate metabolic process	4	595	0.531403	0.768398	Sfur003978(PUDP);Sfur005629(Pigu);Sfur006937(LMJF_27_0420);Sfur009957(Upp1)
GO:0001736	establishment of planar polarity	1	118	0.53226	0.768398	Sfur008722(PTK7)
GO:0007164	establishment of tissue polarity	1	118	0.53226	0.768398	Sfur008722(PTK7)
GO:0043434	response to peptide hormone	1	118	0.53226	0.768398	Sfur005310(Ucp2)
GO:0043412	macromolecule modification	12	1858	0.532713	0.768398	MSTRG.14666(Stt3a);MSTRG.22969(--);Sfur001080(Ppig);Sfur002079(PPP1R9A);Sfur003483(Madm);Sfur005629(Pigu);Sfur005841(RB1CC1);Sfur006776(ASH1L);Sfur007675(Gpr161);Sfur008091(RB1CC1);Sfur010797(Arntl);Sfur011490(ball)
GO:0033157	regulation of intracellular protein transport	1	119	0.535282	0.771325	Sfur012506(APOD)
GO:0044710	single-organism metabolic process	19	2960	0.535827	0.771332	MSTRG.14666(Stt3a);MSTRG.16085(Mapre3);Sfur000881(Lip1);Sfur003398(MMAB);Sfur003978(PUDP);Sfur005310(Ucp2);Sfur005629(Pigu);Sfur005767(ACAA2);Sfur005841(RB1CC1);Sfur006776(ASH1L);Sfur006937(LMJF_27_0420);Sfur007675(Gpr161);Sfur008091(RB1CC1);Sfur009447(Uro);Sfur009957(Upp1);Sfur011355(gadl1);Sfur011490(ball);Sfur012506(APOD);Sfur013239(FAAH2)
GO:0030111	regulation of Wnt signaling pathway	1	120	0.538285	0.773312	Sfur010797(Arntl)
GO:0044242	cellular lipid catabolic process	1	120	0.538285	0.773312	Sfur005767(ACAA2)
GO:0098655	cation transmembrane transport	2	283	0.543111	0.77946	Sfur005310(Ucp2);Sfur010546(--)
GO:0008202	steroid metabolic process	1	122	0.544235	0.780289	Sfur005767(ACAA2)
GO:0001933	negative regulation of protein phosphorylation	1	124	0.550109	0.784771	Sfur006776(ASH1L)
GO:0008654	phospholipid biosynthetic process	1	124	0.550109	0.784771	Sfur005629(Pigu)
GO:0017038	protein import	1	124	0.550109	0.784771	Sfur012506(APOD)
GO:0045860	positive regulation of protein kinase activity	1	124	0.550109	0.784771	Sfur002079(PPP1R9A)
GO:1901617	organic hydroxy compound biosynthetic process	1	124	0.550109	0.784771	Sfur005767(ACAA2)
GO:0048592	eye morphogenesis	2	288	0.552696	0.786274	MSTRG.22969(--);Sfur002163(bdl)
GO:0098660	inorganic ion transmembrane transport	2	288	0.552696	0.786274	Sfur005310(Ucp2);Sfur010546(--)
GO:0044802	single-organism membrane organization	3	450	0.552815	0.786274	Sfur005767(ACAA2);Sfur005841(RB1CC1);Sfur008091(RB1CC1)
GO:0010976	positive regulation of neuron projection development	1	126	0.555909	0.786757	Sfur002079(PPP1R9A)
GO:0042060	wound healing	1	126	0.555909	0.786757	Sfur012506(APOD)
GO:0043087	regulation of GTPase activity	1	126	0.555909	0.786757	MSTRG.14617(RANBP1)
GO:0045216	cell-cell junction organization	1	126	0.555909	0.786757	Sfur012506(APOD)
GO:1903046	meiotic cell cycle process	1	126	0.555909	0.786757	Sfur011490(ball)
GO:0090407	organophosphate biosynthetic process	2	290	0.556491	0.786801	Sfur005629(Pigu);Sfur009957(Upp1)
GO:0042063	gliogenesis	1	127	0.558781	0.788478	Sfur002163(bdl)
GO:0051606	detection of stimulus	1	127	0.558781	0.788478	Sfur010067(pde-5)
GO:0006915	apoptotic process	4	616	0.559502	0.788715	Sfur005310(Ucp2);Sfur005767(ACAA2);Sfur005841(RB1CC1);Sfur008091(RB1CC1)
GO:0055114	oxidation-reduction process	2	292	0.560264	0.789011	Sfur005767(ACAA2);Sfur012506(APOD)
GO:0001501	skeletal system development	1	128	0.561635	0.790085	Sfur006776(ASH1L)
GO:0007276	gamete generation	4	618	0.562133	0.790085	MSTRG.22969(--);Sfur001170(IFT27);Sfur010797(Arntl);Sfur011490(ball)
GO:0016054	organic acid catabolic process	1	129	0.564471	0.790978	Sfur005767(ACAA2)
GO:0046395	carboxylic acid catabolic process	1	129	0.564471	0.790978	Sfur005767(ACAA2)
GO:1903649	regulation of cytoplasmic transport	1	129	0.564471	0.790978	Sfur012506(APOD)
GO:0042221	response to chemical	10	1580	0.564984	0.790978	MSTRG.14617(RANBP1);Sfur002079(PPP1R9A);Sfur002163(bdl);Sfur005310(Ucp2);Sfur005767(ACAA2);Sfur009576(SS18L1);Sfur010067(pde-5);Sfur010546(--);Sfur010797(Arntl);Sfur012506(APOD)
GO:0009798	axis specification	1	130	0.567289	0.791102	MSTRG.22969(--)
GO:0042461	photoreceptor cell development	1	130	0.567289	0.791102	Sfur002163(bdl)
GO:0048663	neuron fate commitment	1	130	0.567289	0.791102	MSTRG.22969(--)
GO:0071214	cellular response to abiotic stimulus	1	130	0.567289	0.791102	Sfur010546(--)
GO:0005975	carbohydrate metabolic process	3	461	0.5695	0.793411	MSTRG.14666(Stt3a);Sfur006937(LMJF_27_0420);Sfur012506(APOD)
GO:0007416	synapse assembly	1	131	0.570089	0.793457	Sfur002079(PPP1R9A)
GO:0048584	positive regulation of response to stimulus	5	788	0.572678	0.795004	Sfur000631(SPE);Sfur005841(RB1CC1);Sfur007675(Gpr161);Sfur008091(RB1CC1);Sfur010797(Arntl)
GO:0008015	blood circulation	1	132	0.572871	0.795004	Sfur007675(Gpr161)
GO:0051235	maintenance of location	1	132	0.572871	0.795004	Sfur006059(SLC17A7)
GO:0043543	protein acylation	1	133	0.575635	0.797291	Sfur010797(Arntl)
GO:0051258	protein polymerization	1	133	0.575635	0.797291	Sfur002079(PPP1R9A)
GO:0006874	cellular calcium ion homeostasis	1	134	0.578382	0.797317	Sfur007675(Gpr161)
GO:0016050	vesicle organization	1	134	0.578382	0.797317	Sfur006059(SLC17A7)
GO:0032844	regulation of homeostatic process	1	134	0.578382	0.797317	Sfur005310(Ucp2)
GO:0042326	negative regulation of phosphorylation	1	134	0.578382	0.797317	Sfur006776(ASH1L)
GO:0051960	regulation of nervous system development	3	467	0.578446	0.797317	MSTRG.14617(RANBP1);Sfur002079(PPP1R9A);Sfur010797(Arntl)
GO:0030030	cell projection organization	6	957	0.581069	0.798679	MSTRG.14617(RANBP1);Sfur001170(IFT27);Sfur002079(PPP1R9A);Sfur002163(bdl);Sfur010067(pde-5);Sfur012506(APOD)
GO:0034504	protein localization to nucleus	1	135	0.581112	0.798679	Sfur012506(APOD)
GO:0048588	developmental cell growth	1	135	0.581112	0.798679	Sfur002163(bdl)
GO:0034330	cell junction organization	1	136	0.583824	0.800096	Sfur012506(APOD)
GO:0044782	cilium organization	1	136	0.583824	0.800096	Sfur001170(IFT27)
GO:0051705	multi-organism behavior	1	136	0.583824	0.800096	Sfur007299(--)
GO:1901652	response to peptide	1	137	0.586518	0.803018	Sfur005310(Ucp2)
GO:0048513	animal organ development	10	1606	0.587491	0.803579	MSTRG.22969(--);Sfur001170(IFT27);Sfur002163(bdl);Sfur005310(Ucp2);Sfur005841(RB1CC1);Sfur006776(ASH1L);Sfur008091(RB1CC1);Sfur010797(Arntl);Sfur012506(APOD);Sfur013880(ken)
GO:0055074	calcium ion homeostasis	1	138	0.589196	0.80514	Sfur007675(Gpr161)
GO:0016485	protein processing	1	139	0.591857	0.807231	Sfur012973(Mipep)
GO:0072001	renal system development	1	139	0.591857	0.807231	Sfur001170(IFT27)
GO:0031175	neuron projection development	4	644	0.595594	0.811553	MSTRG.14617(RANBP1);Sfur002079(PPP1R9A);Sfur002163(bdl);Sfur012506(APOD)
GO:0001738	morphogenesis of a polarized epithelium	1	141	0.597127	0.812867	Sfur008722(PTK7)
GO:0009165	nucleotide biosynthetic process	1	143	0.602331	0.818932	Sfur009957(Upp1)
GO:1901615	organic hydroxy compound metabolic process	2	316	0.6038	0.818932	MSTRG.16085(Mapre3);Sfur005767(ACAA2)
GO:0002831	regulation of response to biotic stimulus	1	144	0.604908	0.818932	Sfur000631(SPE)
GO:0072503	cellular divalent inorganic cation homeostasis	1	144	0.604908	0.818932	Sfur007675(Gpr161)
GO:0031344	regulation of cell projection organization	2	317	0.605544	0.818932	MSTRG.14617(RANBP1);Sfur002079(PPP1R9A)
GO:0090596	sensory organ morphogenesis	2	317	0.605544	0.818932	MSTRG.22969(--);Sfur002163(bdl)
GO:0003006	developmental process involved in reproduction	4	652	0.605597	0.818932	MSTRG.22969(--);Sfur006776(ASH1L);Sfur011490(ball);Sfur013880(ken)
GO:0003013	circulatory system process	1	145	0.607468	0.820685	Sfur007675(Gpr161)
GO:0001655	urogenital system development	1	147	0.612541	0.823642	Sfur001170(IFT27)
GO:0007611	learning or memory	1	147	0.612541	0.823642	Sfur006059(SLC17A7)
GO:0019216	regulation of lipid metabolic process	1	147	0.612541	0.823642	Sfur012506(APOD)
GO:0051146	striated muscle cell differentiation	1	147	0.612541	0.823642	Sfur011490(ball)
GO:1901293	nucleoside phosphate biosynthetic process	1	147	0.612541	0.823642	Sfur009957(Upp1)
GO:0016032	viral process	1	148	0.615052	0.825465	Sfur013517(ATG16L1)
GO:0051302	regulation of cell division	1	148	0.615052	0.825465	MSTRG.14617(RANBP1)
GO:0006486	protein glycosylation	1	149	0.617548	0.826492	MSTRG.14666(Stt3a)
GO:0043413	macromolecule glycosylation	1	149	0.617548	0.826492	MSTRG.14666(Stt3a)
GO:0032879	regulation of localization	6	993	0.618603	0.826492	Sfur002079(PPP1R9A);Sfur005310(Ucp2);Sfur005767(ACAA2);Sfur010100(BEST3);Sfur010797(Arntl);Sfur012506(APOD)
GO:0007155	cell adhesion	3	495	0.618684	0.826492	Sfur002163(bdl);Sfur008722(PTK7);Sfur012506(APOD)
GO:0048523	negative regulation of cellular process	11	1804	0.618711	0.826492	MSTRG.22969(--);Sfur002079(PPP1R9A);Sfur005310(Ucp2);Sfur005767(ACAA2);Sfur005841(RB1CC1);Sfur006024(BAHD1);Sfur006776(ASH1L);Sfur008091(RB1CC1);Sfur010067(pde-5);Sfur010797(Arntl);Sfur012506(APOD)
GO:0006869	lipid transport	1	150	0.620028	0.826705	Sfur012506(APOD)
GO:0071417	cellular response to organonitrogen compound	1	150	0.620028	0.826705	Sfur005310(Ucp2)
GO:0033674	positive regulation of kinase activity	1	151	0.622493	0.827667	Sfur002079(PPP1R9A)
GO:0051338	regulation of transferase activity	2	327	0.62267	0.827667	MSTRG.22969(--);Sfur002079(PPP1R9A)
GO:0031329	regulation of cellular catabolic process	2	328	0.624352	0.827667	Sfur005841(RB1CC1);Sfur008091(RB1CC1)
GO:0048519	negative regulation of biological process	12	1972	0.624498	0.827667	MSTRG.22969(--);Sfur002079(PPP1R9A);Sfur005310(Ucp2);Sfur005767(ACAA2);Sfur005841(RB1CC1);Sfur006024(BAHD1);Sfur006776(ASH1L);Sfur008091(RB1CC1);Sfur010067(pde-5);Sfur010100(BEST3);Sfur010797(Arntl);Sfur012506(APOD)
GO:0007517	muscle organ development	1	152	0.624941	0.827667	Sfur010797(Arntl)
GO:0009615	response to virus	1	152	0.624941	0.827667	Sfur005266(EbpIII)
GO:0070085	glycosylation	1	152	0.624941	0.827667	MSTRG.14666(Stt3a)
GO:0010604	positive regulation of macromolecule metabolic process	8	1327	0.625515	0.827667	Sfur002079(PPP1R9A);Sfur005841(RB1CC1);Sfur006776(ASH1L);Sfur007675(Gpr161);Sfur008091(RB1CC1);Sfur009576(SS18L1);Sfur010067(pde-5);Sfur010797(Arntl)
GO:0045664	regulation of neuron differentiation	2	329	0.626028	0.827667	MSTRG.14617(RANBP1);Sfur002079(PPP1R9A)
GO:0008038	neuron recognition	1	153	0.627374	0.827667	Sfur002163(bdl)
GO:0048514	blood vessel morphogenesis	1	153	0.627374	0.827667	Sfur012506(APOD)
GO:0044085	cellular component biogenesis	9	1492	0.627705	0.827667	MSTRG.16085(Mapre3);Sfur002079(PPP1R9A);Sfur005841(RB1CC1);Sfur006024(BAHD1);Sfur008091(RB1CC1);Sfur009541(GF10347);Sfur011490(ball);Sfur012506(APOD);Sfur013517(ATG16L1)
GO:0060284	regulation of cell development	3	502	0.628345	0.827745	MSTRG.14617(RANBP1);Sfur002079(PPP1R9A);Sfur010797(Arntl)
GO:0061024	membrane organization	3	503	0.629711	0.828124	Sfur005767(ACAA2);Sfur005841(RB1CC1);Sfur008091(RB1CC1)
GO:0032956	regulation of actin cytoskeleton organization	1	154	0.629792	0.828124	Sfur002079(PPP1R9A)
GO:0012501	programmed cell death	4	673	0.631166	0.829167	Sfur005310(Ucp2);Sfur005767(ACAA2);Sfur005841(RB1CC1);Sfur008091(RB1CC1)
GO:0072507	divalent inorganic cation homeostasis	1	155	0.632194	0.829675	Sfur007675(Gpr161)
GO:0046907	intracellular transport	6	1007	0.632715	0.829675	Sfur001170(IFT27);Sfur003483(Madm);Sfur005310(Ucp2);Sfur005767(ACAA2);Sfur012506(APOD);Sfur012973(Mipep)
GO:0050778	positive regulation of immune response	1	156	0.63458	0.831336	Sfur000631(SPE)
GO:0006886	intracellular protein transport	3	507	0.635146	0.831336	Sfur001170(IFT27);Sfur012506(APOD);Sfur012973(Mipep)
GO:0030707	ovarian follicle cell development	1	157	0.636952	0.832175	MSTRG.22969(--)
GO:0051604	protein maturation	1	157	0.636952	0.832175	Sfur012973(Mipep)
GO:0043623	cellular protein complex assembly	2	336	0.637603	0.832264	Sfur002079(PPP1R9A);Sfur009541(GF10347)
GO:0044248	cellular catabolic process	6	1015	0.64065	0.833724	Sfur005767(ACAA2);Sfur005841(RB1CC1);Sfur008091(RB1CC1);Sfur009447(Uro);Sfur009957(Upp1);Sfur010797(Arntl)
GO:0008610	lipid biosynthetic process	2	338	0.640859	0.833724	Sfur005629(Pigu);Sfur005767(ACAA2)
GO:0032970	regulation of actin filament-based process	1	159	0.64165	0.833724	Sfur002079(PPP1R9A)
GO:0022610	biological adhesion	3	512	0.641863	0.833724	Sfur002163(bdl);Sfur008722(PTK7);Sfur012506(APOD)
GO:0031325	positive regulation of cellular metabolic process	8	1346	0.642347	0.833724	Sfur000631(SPE);Sfur002079(PPP1R9A);Sfur005841(RB1CC1);Sfur006776(ASH1L);Sfur007675(Gpr161);Sfur008091(RB1CC1);Sfur009576(SS18L1);Sfur010797(Arntl)
GO:0043414	macromolecule methylation	1	160	0.643976	0.833724	Sfur006776(ASH1L)
GO:0050890	cognition	1	160	0.643976	0.833724	Sfur006059(SLC17A7)
GO:0060560	developmental growth involved in morphogenesis	1	160	0.643976	0.833724	Sfur008722(PTK7)
GO:0098813	nuclear chromosome segregation	1	160	0.643976	0.833724	Sfur011490(ball)
GO:0007626	locomotory behavior	1	163	0.650867	0.841882	MSTRG.16085(Mapre3)
GO:0018105	peptidyl-serine phosphorylation	1	164	0.653134	0.843287	Sfur011490(ball)
GO:0043254	regulation of protein complex assembly	1	164	0.653134	0.843287	Sfur002079(PPP1R9A)
GO:0044764	multi-organism cellular process	1	165	0.655387	0.845065	Sfur013517(ATG16L1)
GO:0002697	regulation of immune effector process	1	166	0.657626	0.845065	Sfur000631(SPE)
GO:0006650	glycerophospholipid metabolic process	1	166	0.657626	0.845065	Sfur005629(Pigu)
GO:0008037	cell recognition	1	166	0.657626	0.845065	Sfur002163(bdl)
GO:0045666	positive regulation of neuron differentiation	1	166	0.657626	0.845065	Sfur002079(PPP1R9A)
GO:0006935	chemotaxis	2	350	0.659929	0.845065	Sfur002163(bdl);Sfur010067(pde-5)
GO:0048699	generation of neurons	6	1035	0.660066	0.845065	MSTRG.14617(RANBP1);MSTRG.22969(--);Sfur002079(PPP1R9A);Sfur002163(bdl);Sfur010797(Arntl);Sfur012506(APOD)
GO:0007268	synaptic transmission	2	351	0.661482	0.845065	Sfur002079(PPP1R9A);Sfur006059(SLC17A7)
GO:0030036	actin cytoskeleton organization	2	351	0.661482	0.845065	Sfur002079(PPP1R9A);Sfur011490(ball)
GO:0061061	muscle structure development	2	351	0.661482	0.845065	Sfur010797(Arntl);Sfur011490(ball)
GO:0099537	trans-synaptic signaling	2	351	0.661482	0.845065	Sfur002079(PPP1R9A);Sfur006059(SLC17A7)
GO:0019752	carboxylic acid metabolic process	3	529	0.664072	0.845065	Sfur005767(ACAA2);Sfur011355(gadl1);Sfur013239(FAAH2)
GO:0001568	blood vessel development	1	169	0.664257	0.845065	Sfur012506(APOD)
GO:0006913	nucleocytoplasmic transport	1	169	0.664257	0.845065	Sfur012506(APOD)
GO:0051169	nuclear transport	1	169	0.664257	0.845065	Sfur012506(APOD)
GO:0051321	meiotic cell cycle	1	169	0.664257	0.845065	Sfur011490(ball)
GO:0099536	synaptic signaling	2	353	0.664571	0.845065	Sfur002079(PPP1R9A);Sfur006059(SLC17A7)
GO:0018209	peptidyl-serine modification	1	170	0.666439	0.846686	Sfur011490(ball)
GO:0045597	positive regulation of cell differentiation	2	355	0.667639	0.847456	Sfur002079(PPP1R9A);Sfur010797(Arntl)
GO:0010631	epithelial cell migration	1	172	0.670762	0.849606	MSTRG.22969(--)
GO:0009893	positive regulation of metabolic process	9	1545	0.671563	0.849606	Sfur000631(SPE);Sfur002079(PPP1R9A);Sfur005841(RB1CC1);Sfur006776(ASH1L);Sfur007675(Gpr161);Sfur008091(RB1CC1);Sfur009576(SS18L1);Sfur010067(pde-5);Sfur010797(Arntl)
GO:0030855	epithelial cell differentiation	2	358	0.672198	0.849606	MSTRG.22969(--);Sfur010797(Arntl)
GO:0048477	oogenesis	2	358	0.672198	0.849606	MSTRG.22969(--);Sfur011490(ball)
GO:0044057	regulation of system process	1	173	0.672902	0.849606	Sfur007675(Gpr161)
GO:0090132	epithelium migration	1	173	0.672902	0.849606	MSTRG.22969(--)
GO:0006461	protein complex assembly	3	538	0.675434	0.849701	MSTRG.16085(Mapre3);Sfur002079(PPP1R9A);Sfur009541(GF10347)
GO:0070271	protein complex biogenesis	3	538	0.675434	0.849701	MSTRG.16085(Mapre3);Sfur002079(PPP1R9A);Sfur009541(GF10347)
GO:0016043	cellular component organization	20	3325	0.676593	0.849701	MSTRG.14617(RANBP1);MSTRG.16085(Mapre3);Sfur000712(PEX11G);Sfur001170(IFT27);Sfur002079(PPP1R9A);Sfur002163(bdl);Sfur003483(Madm);Sfur005767(ACAA2);Sfur005841(RB1CC1);Sfur006024(BAHD1);Sfur006059(SLC17A7);Sfur006776(ASH1L);Sfur008091(RB1CC1);Sfur009541(GF10347);Sfur009576(SS18L1);Sfur010067(pde-5);Sfur011490(ball);Sfur012506(APOD);Sfur012973(Mipep);Sfur013517(ATG16L1)
GO:0040007	growth	3	539	0.67668	0.849701	Sfur002163(bdl);Sfur008722(PTK7);Sfur012506(APOD)
GO:0010769	regulation of cell morphogenesis involved in differentiation	1	175	0.677143	0.849701	Sfur002079(PPP1R9A)
GO:0021700	developmental maturation	1	175	0.677143	0.849701	Sfur006059(SLC17A7)
GO:0030155	regulation of cell adhesion	1	175	0.677143	0.849701	Sfur012506(APOD)
GO:0010876	lipid localization	1	176	0.679242	0.850379	Sfur012506(APOD)
GO:0016337	single organismal cell-cell adhesion	1	176	0.679242	0.850379	Sfur002163(bdl)
GO:0031346	positive regulation of cell projection organization	1	177	0.681329	0.850379	Sfur002079(PPP1R9A)
GO:0090130	tissue migration	1	177	0.681329	0.850379	MSTRG.22969(--)
GO:0009101	glycoprotein biosynthetic process	1	178	0.683402	0.850379	MSTRG.14666(Stt3a)
GO:0009161	ribonucleoside monophosphate metabolic process	1	178	0.683402	0.850379	Sfur009957(Upp1)
GO:0009416	response to light stimulus	1	178	0.683402	0.850379	Sfur010067(pde-5)
GO:0032870	cellular response to hormone stimulus	1	178	0.683402	0.850379	Sfur005310(Ucp2)
GO:0007275	multicellular organism development	17	2858	0.683545	0.850379	MSTRG.14617(RANBP1);MSTRG.16085(Mapre3);MSTRG.22969(--);MSTRG.32769(Ccp84Ab);MSTRG.32778(ACP21);Sfur001170(IFT27);Sfur002079(PPP1R9A);Sfur002163(bdl);Sfur005310(Ucp2);Sfur005841(RB1CC1);Sfur006776(ASH1L);Sfur008091(RB1CC1);Sfur010067(pde-5);Sfur010546(--);Sfur010797(Arntl);Sfur012506(APOD);Sfur013880(ken)
GO:0035114	imaginal disc-derived appendage morphogenesis	1	179	0.685462	0.850379	MSTRG.22969(--)
GO:0010563	negative regulation of phosphorus metabolic process	1	180	0.687508	0.850379	Sfur006776(ASH1L)
GO:0045936	negative regulation of phosphate metabolic process	1	180	0.687508	0.850379	Sfur006776(ASH1L)
GO:0030029	actin filament-based process	2	369	0.688496	0.850379	Sfur002079(PPP1R9A);Sfur011490(ball)
GO:0006508	proteolysis	4	725	0.689966	0.850379	Sfur000631(SPE);Sfur010797(Arntl);Sfur011940(DppIII);Sfur012973(Mipep)
GO:0034655	nucleobase-containing compound catabolic process	1	182	0.691563	0.850379	Sfur009957(Upp1)
GO:0048813	dendrite morphogenesis	1	182	0.691563	0.850379	Sfur002079(PPP1R9A)
GO:0033036	macromolecule localization	8	1405	0.691999	0.850379	Sfur001170(IFT27);Sfur003483(Madm);Sfur005310(Ucp2);Sfur005629(Pigu);Sfur010797(Arntl);Sfur012506(APOD);Sfur012973(Mipep);Sfur013517(ATG16L1)
GO:0051248	negative regulation of protein metabolic process	2	372	0.692826	0.850379	Sfur006776(ASH1L);Sfur012506(APOD)
GO:0001944	vasculature development	1	183	0.69357	0.850379	Sfur012506(APOD)
GO:0048193	Golgi vesicle transport	1	183	0.69357	0.850379	Sfur003483(Madm)
GO:0050804	modulation of synaptic transmission	1	183	0.69357	0.850379	Sfur002079(PPP1R9A)
GO:0043207	response to external biotic stimulus	2	373	0.694259	0.850379	Sfur000631(SPE);Sfur005266(EbpIII)
GO:0051707	response to other organism	2	373	0.694259	0.850379	Sfur000631(SPE);Sfur005266(EbpIII)
GO:0051240	positive regulation of multicellular organismal process	3	554	0.694954	0.850379	Sfur002079(PPP1R9A);Sfur007675(Gpr161);Sfur010797(Arntl)
GO:0055085	transmembrane transport	3	554	0.694954	0.850379	Sfur000424(CG17119);Sfur005310(Ucp2);Sfur010546(--)
GO:0007018	microtubule-based movement	1	184	0.695565	0.850379	Sfur001170(IFT27)
GO:0007059	chromosome segregation	1	184	0.695565	0.850379	Sfur011490(ball)
GO:0048870	cell motility	3	555	0.696145	0.850379	MSTRG.22969(--);Sfur006776(ASH1L);Sfur012506(APOD)
GO:0008219	cell death	4	731	0.696324	0.850379	Sfur005310(Ucp2);Sfur005767(ACAA2);Sfur005841(RB1CC1);Sfur008091(RB1CC1)
GO:0007292	female gamete generation	2	375	0.697109	0.850379	MSTRG.22969(--);Sfur011490(ball)
GO:0051674	localization of cell	3	556	0.697333	0.850379	MSTRG.22969(--);Sfur006776(ASH1L);Sfur012506(APOD)
GO:0048737	imaginal disc-derived appendage development	1	185	0.697547	0.850379	MSTRG.22969(--)
GO:1901699	cellular response to nitrogen compound	1	185	0.697547	0.850379	Sfur005310(Ucp2)
GO:0009894	regulation of catabolic process	2	376	0.698525	0.850379	Sfur005841(RB1CC1);Sfur008091(RB1CC1)
GO:1903047	mitotic cell cycle process	2	376	0.698525	0.850379	MSTRG.14617(RANBP1);Sfur011490(ball)
GO:0032259	methylation	1	186	0.699516	0.85086	Sfur006776(ASH1L)
GO:0009607	response to biotic stimulus	2	378	0.701343	0.851887	Sfur000631(SPE);Sfur005266(EbpIII)
GO:0016265	death	4	736	0.701554	0.851887	Sfur005310(Ucp2);Sfur005767(ACAA2);Sfur005841(RB1CC1);Sfur008091(RB1CC1)
GO:0009123	nucleoside monophosphate metabolic process	1	188	0.703417	0.8527	Sfur009957(Upp1)
GO:0051347	positive regulation of transferase activity	1	188	0.703417	0.8527	Sfur002079(PPP1R9A)
GO:0016482	cytoplasmic transport	3	562	0.704388	0.853152	Sfur003483(Madm);Sfur012506(APOD);Sfur012973(Mipep)
GO:0007424	open tracheal system development	1	189	0.705349	0.853592	Sfur010546(--)
GO:0009617	response to bacterium	1	191	0.709176	0.856771	Sfur000631(SPE)
GO:0010942	positive regulation of cell death	1	191	0.709176	0.856771	Sfur005310(Ucp2)
GO:0043269	regulation of ion transport	1	192	0.711071	0.858334	Sfur010100(BEST3)
GO:0008285	negative regulation of cell proliferation	1	194	0.714824	0.861231	Sfur012506(APOD)
GO:0009100	glycoprotein metabolic process	1	194	0.714824	0.861231	MSTRG.14666(Stt3a)
GO:1901564	organonitrogen compound metabolic process	7	1266	0.71528	0.861231	Sfur000631(SPE);Sfur003398(MMAB);Sfur003978(PUDP);Sfur006937(LMJF_27_0420);Sfur009447(Uro);Sfur009957(Upp1);Sfur012973(Mipep)
GO:0001654	eye development	2	389	0.71646	0.861924	MSTRG.22969(--);Sfur002163(bdl)
GO:0006066	alcohol metabolic process	1	196	0.71853	0.862961	Sfur005767(ACAA2)
GO:0050769	positive regulation of neurogenesis	1	196	0.71853	0.862961	Sfur002079(PPP1R9A)
GO:0043436	oxoacid metabolic process	3	575	0.719257	0.863108	Sfur005767(ACAA2);Sfur011355(gadl1);Sfur013239(FAAH2)
GO:0030031	cell projection assembly	1	197	0.720365	0.863116	Sfur002079(PPP1R9A)
GO:0033365	protein localization to organelle	2	392	0.720472	0.863116	Sfur012506(APOD);Sfur012973(Mipep)
GO:0022008	neurogenesis	6	1103	0.721313	0.863399	MSTRG.14617(RANBP1);MSTRG.22969(--);Sfur002079(PPP1R9A);Sfur002163(bdl);Sfur010797(Arntl);Sfur012506(APOD)
GO:0050776	regulation of immune response	1	200	0.7258	0.867316	Sfur000631(SPE)
GO:0098602	single organism cell adhesion	1	200	0.7258	0.867316	Sfur002163(bdl)
GO:0042330	taxis	2	397	0.727056	0.868	Sfur002163(bdl);Sfur010067(pde-5)
GO:0042692	muscle cell differentiation	1	201	0.727588	0.868	Sfur011490(ball)
GO:0065003	macromolecular complex assembly	4	763	0.728716	0.86816	MSTRG.16085(Mapre3);Sfur002079(PPP1R9A);Sfur006024(BAHD1);Sfur009541(GF10347)
GO:0006928	movement of cell or subcellular component	5	939	0.728938	0.86816	MSTRG.22969(--);Sfur001170(IFT27);Sfur002163(bdl);Sfur006776(ASH1L);Sfur012506(APOD)
GO:0033043	regulation of organelle organization	3	585	0.730308	0.869066	MSTRG.14617(RANBP1);Sfur002079(PPP1R9A);Sfur005767(ACAA2)
GO:1903827	regulation of cellular protein localization	1	203	0.731131	0.869321	Sfur012506(APOD)
GO:0006955	immune response	2	404	0.736058	0.874452	MSTRG.16085(Mapre3);Sfur000631(SPE)
GO:0051726	regulation of cell cycle	2	405	0.737324	0.874672	MSTRG.14617(RANBP1);Sfur010797(Arntl)
GO:0009119	ribonucleoside metabolic process	1	207	0.738081	0.874672	Sfur009957(Upp1)
GO:0046486	glycerolipid metabolic process	1	207	0.738081	0.874672	Sfur005629(Pigu)
GO:0010927	cellular component assembly involved in morphogenesis	1	210	0.743177	0.879981	Sfur011490(ball)
GO:0007548	sex differentiation	1	211	0.744854	0.881236	Sfur013880(ken)
GO:0018205	peptidyl-lysine modification	1	212	0.746521	0.882476	Sfur006776(ASH1L)
GO:0044087	regulation of cellular component biogenesis	2	413	0.747269	0.882631	Sfur002079(PPP1R9A);Sfur012506(APOD)
GO:0007015	actin filament organization	1	213	0.748176	0.882972	Sfur002079(PPP1R9A)
GO:0008283	cell proliferation	3	603	0.749363	0.883642	MSTRG.22969(--);Sfur003483(Madm);Sfur012506(APOD)
GO:0030182	neuron differentiation	5	965	0.751391	0.884605	MSTRG.14617(RANBP1);MSTRG.22969(--);Sfur002079(PPP1R9A);Sfur002163(bdl);Sfur012506(APOD)
GO:0006732	coenzyme metabolic process	1	215	0.751456	0.884605	Sfur006937(LMJF_27_0420)
GO:0061564	axon development	2	417	0.752123	0.884605	Sfur002163(bdl);Sfur012506(APOD)
GO:0050808	synapse organization	1	216	0.75308	0.884605	Sfur002079(PPP1R9A)
GO:0001667	ameboidal-type cell migration	1	217	0.754693	0.884605	MSTRG.22969(--)
GO:0006644	phospholipid metabolic process	1	217	0.754693	0.884605	Sfur005629(Pigu)
GO:0071840	cellular component organization or biogenesis	20	3459	0.755414	0.884605	MSTRG.14617(RANBP1);MSTRG.16085(Mapre3);Sfur000712(PEX11G);Sfur001170(IFT27);Sfur002079(PPP1R9A);Sfur002163(bdl);Sfur003483(Madm);Sfur005767(ACAA2);Sfur005841(RB1CC1);Sfur006024(BAHD1);Sfur006059(SLC17A7);Sfur006776(ASH1L);Sfur008091(RB1CC1);Sfur009541(GF10347);Sfur009576(SS18L1);Sfur010067(pde-5);Sfur011490(ball);Sfur012506(APOD);Sfur012973(Mipep);Sfur013517(ATG16L1)
GO:0071822	protein complex subunit organization	4	792	0.755869	0.884605	MSTRG.16085(Mapre3);Sfur002079(PPP1R9A);Sfur009541(GF10347);Sfur011490(ball)
GO:0009888	tissue development	6	1147	0.756846	0.884605	MSTRG.22969(--);Sfur006776(ASH1L);Sfur008722(PTK7);Sfur010797(Arntl);Sfur012506(APOD);Sfur013880(ken)
GO:0031328	positive regulation of cellular biosynthetic process	4	794	0.757665	0.884605	Sfur000631(SPE);Sfur006776(ASH1L);Sfur009576(SS18L1);Sfur010797(Arntl)
GO:0016358	dendrite development	1	219	0.757889	0.884605	Sfur002079(PPP1R9A)
GO:0051301	cell division	2	422	0.758079	0.884605	MSTRG.14617(RANBP1);Sfur011490(ball)
GO:0048666	neuron development	4	796	0.759451	0.884605	MSTRG.14617(RANBP1);Sfur002079(PPP1R9A);Sfur002163(bdl);Sfur012506(APOD)
GO:0016049	cell growth	1	220	0.759472	0.884605	Sfur002163(bdl)
GO:0031400	negative regulation of protein modification process	1	220	0.759472	0.884605	Sfur006776(ASH1L)
GO:0044267	cellular protein metabolic process	13	2336	0.76194	0.886757	MSTRG.14666(Stt3a);MSTRG.22969(--);Sfur001080(Ppig);Sfur002079(PPP1R9A);Sfur003483(Madm);Sfur005629(Pigu);Sfur005841(RB1CC1);Sfur006776(ASH1L);Sfur007675(Gpr161);Sfur008091(RB1CC1);Sfur010797(Arntl);Sfur011490(ball);Sfur012973(Mipep)
GO:0048731	system development	13	2338	0.763116	0.887402	MSTRG.14617(RANBP1);MSTRG.22969(--);Sfur001170(IFT27);Sfur002079(PPP1R9A);Sfur002163(bdl);Sfur005310(Ucp2);Sfur005841(RB1CC1);Sfur006776(ASH1L);Sfur008091(RB1CC1);Sfur010546(--);Sfur010797(Arntl);Sfur012506(APOD);Sfur013880(ken)
GO:0002682	regulation of immune system process	2	429	0.766216	0.890281	Sfur000631(SPE);Sfur012506(APOD)
GO:0002684	positive regulation of immune system process	1	227	0.770269	0.894263	Sfur000631(SPE)
GO:0009891	positive regulation of biosynthetic process	4	813	0.774239	0.898005	Sfur000631(SPE);Sfur006776(ASH1L);Sfur009576(SS18L1);Sfur010797(Arntl)
GO:0009314	response to radiation	1	230	0.774749	0.898005	Sfur010067(pde-5)
GO:0034613	cellular protein localization	4	815	0.775932	0.898255	Sfur001170(IFT27);Sfur005629(Pigu);Sfur012506(APOD);Sfur012973(Mipep)
GO:0051493	regulation of cytoskeleton organization	1	231	0.776223	0.898255	Sfur002079(PPP1R9A)
GO:0007552	metamorphosis	1	232	0.777688	0.898494	Sfur005266(EbpIII)
GO:0035107	appendage morphogenesis	1	232	0.777688	0.898494	MSTRG.22969(--)
GO:1902580	single-organism cellular localization	3	633	0.778781	0.898721	MSTRG.16085(Mapre3);Sfur012506(APOD);Sfur012973(Mipep)
GO:0034248	regulation of cellular amide metabolic process	1	233	0.779143	0.898721	Sfur000631(SPE)
GO:0051962	positive regulation of nervous system development	1	234	0.780589	0.899662	Sfur002079(PPP1R9A)
GO:0007346	regulation of mitotic cell cycle	1	235	0.782026	0.900591	MSTRG.14617(RANBP1)
GO:0050790	regulation of catalytic activity	3	641	0.786144	0.904604	MSTRG.14617(RANBP1);MSTRG.22969(--);Sfur002079(PPP1R9A)
GO:0022402	cell cycle process	3	642	0.787051	0.904918	MSTRG.14617(RANBP1);MSTRG.16085(Mapre3);Sfur011490(ball)
GO:0051186	cofactor metabolic process	1	241	0.790454	0.9081	Sfur006937(LMJF_27_0420)
GO:0045944	positive regulation of transcription from RNA polymerase II promoter	2	453	0.792369	0.908322	Sfur006776(ASH1L);Sfur009576(SS18L1)
GO:0070727	cellular macromolecule localization	4	836	0.793136	0.908322	Sfur001170(IFT27);Sfur005629(Pigu);Sfur012506(APOD);Sfur012973(Mipep)
GO:0030334	regulation of cell migration	1	243	0.793192	0.908322	Sfur012506(APOD)
GO:0060249	anatomical structure homeostasis	1	243	0.793192	0.908322	Sfur006059(SLC17A7)
GO:0007281	germ cell development	2	455	0.794431	0.909012	MSTRG.22969(--);Sfur011490(ball)
GO:0010243	response to organonitrogen compound	1	245	0.795894	0.909098	Sfur005310(Ucp2)
GO:0051656	establishment of organelle localization	1	245	0.795894	0.909098	MSTRG.16085(Mapre3)
GO:0060541	respiratory system development	1	246	0.797232	0.909098	Sfur010546(--)
GO:0045893	positive regulation of transcription, DNA-templated	3	654	0.797689	0.909098	Sfur006776(ASH1L);Sfur009576(SS18L1);Sfur010797(Arntl)
GO:1903508	positive regulation of nucleic acid-templated transcription	3	654	0.797689	0.909098	Sfur006776(ASH1L);Sfur009576(SS18L1);Sfur010797(Arntl)
GO:1902680	positive regulation of RNA biosynthetic process	3	656	0.799419	0.910344	Sfur006776(ASH1L);Sfur009576(SS18L1);Sfur010797(Arntl)
GO:0043900	regulation of multi-organism process	1	249	0.801195	0.911639	Sfur000631(SPE)
GO:0048736	appendage development	1	250	0.802499	0.912396	MSTRG.22969(--)
GO:0098542	defense response to other organism	1	252	0.805082	0.914602	Sfur000631(SPE)
GO:0007186	G-protein coupled receptor signaling pathway	1	253	0.806361	0.914602	Sfur007675(Gpr161)
GO:0010638	positive regulation of organelle organization	1	253	0.806361	0.914602	MSTRG.14617(RANBP1)
GO:0010720	positive regulation of cell development	1	256	0.810149	0.916714	Sfur002079(PPP1R9A)
GO:0045596	negative regulation of cell differentiation	1	256	0.810149	0.916714	Sfur010797(Arntl)
GO:2000145	regulation of cell motility	1	256	0.810149	0.916714	Sfur012506(APOD)
GO:0043161	proteasome-mediated ubiquitin-dependent protein catabolic process	1	257	0.811395	0.917344	Sfur010797(Arntl)
GO:0051276	chromosome organization	3	671	0.812018	0.917344	Sfur006024(BAHD1);Sfur006776(ASH1L);Sfur011490(ball)
GO:0009259	ribonucleotide metabolic process	1	258	0.812633	0.917344	Sfur009957(Upp1)
GO:0007423	sensory organ development	2	477	0.815964	0.920377	MSTRG.22969(--);Sfur002163(bdl)
GO:0042127	regulation of cell proliferation	2	482	0.820575	0.924847	Sfur003483(Madm);Sfur012506(APOD)
GO:0009725	response to hormone	1	269	0.825738	0.927226	Sfur005310(Ucp2)
GO:0010564	regulation of cell cycle process	1	269	0.825738	0.927226	MSTRG.14617(RANBP1)
GO:0098609	cell-cell adhesion	1	269	0.825738	0.927226	Sfur002163(bdl)
GO:0051094	positive regulation of developmental process	2	488	0.825974	0.927226	Sfur002079(PPP1R9A);Sfur010797(Arntl)
GO:0016477	cell migration	2	489	0.826859	0.927226	MSTRG.22969(--);Sfur012506(APOD)
GO:0010498	proteasomal protein catabolic process	1	270	0.826884	0.927226	Sfur010797(Arntl)
GO:0060429	epithelium development	4	882	0.827231	0.927226	MSTRG.22969(--);Sfur008722(PTK7);Sfur010797(Arntl);Sfur013880(ken)
GO:0009653	anatomical structure morphogenesis	9	1783	0.829479	0.929016	MSTRG.22969(--);Sfur002079(PPP1R9A);Sfur002163(bdl);Sfur005266(EbpIII);Sfur006776(ASH1L);Sfur008722(PTK7);Sfur009576(SS18L1);Sfur011490(ball);Sfur012506(APOD)
GO:0022604	regulation of cell morphogenesis	1	273	0.830276	0.929181	Sfur002079(PPP1R9A)
GO:1901362	organic cyclic compound biosynthetic process	9	1786	0.831041	0.929308	Sfur003978(PUDP);Sfur005767(ACAA2);Sfur006024(BAHD1);Sfur006776(ASH1L);Sfur009576(SS18L1);Sfur009957(Upp1);Sfur010797(Arntl);Sfur013517(ATG16L1);Sfur013880(ken)
GO:0051254	positive regulation of RNA metabolic process	3	697	0.832313	0.929986	Sfur006776(ASH1L);Sfur009576(SS18L1);Sfur010797(Arntl)
GO:0048667	cell morphogenesis involved in neuron differentiation	2	496	0.83295	0.929986	Sfur002079(PPP1R9A);Sfur002163(bdl)
GO:0010628	positive regulation of gene expression	4	894	0.835345	0.931379	Sfur006776(ASH1L);Sfur009576(SS18L1);Sfur010067(pde-5);Sfur010797(Arntl)
GO:0000278	mitotic cell cycle	2	499	0.835502	0.931379	MSTRG.14617(RANBP1);Sfur011490(ball)
GO:0022412	cellular process involved in reproduction in multicellular organism	2	500	0.836345	0.931592	MSTRG.22969(--);Sfur011490(ball)
GO:0072521	purine-containing compound metabolic process	1	282	0.840068	0.934724	Sfur009447(Uro)
GO:0002252	immune effector process	1	283	0.841121	0.934724	Sfur000631(SPE)
GO:0044283	small molecule biosynthetic process	1	283	0.841121	0.934724	Sfur005767(ACAA2)
GO:0007411	axon guidance	1	284	0.842167	0.93492	Sfur002163(bdl)
GO:1901698	response to nitrogen compound	1	285	0.843206	0.93492	Sfur005310(Ucp2)
GO:0034654	nucleobase-containing compound biosynthetic process	8	1636	0.843728	0.93492	Sfur003978(PUDP);Sfur006024(BAHD1);Sfur006776(ASH1L);Sfur009576(SS18L1);Sfur009957(Upp1);Sfur010797(Arntl);Sfur013517(ATG16L1);Sfur013880(ken)
GO:0007600	sensory perception	1	286	0.844239	0.93492	MSTRG.16085(Mapre3)
GO:0045595	regulation of cell differentiation	3	714	0.84457	0.93492	MSTRG.14617(RANBP1);Sfur002079(PPP1R9A);Sfur010797(Arntl)
GO:0050877	neurological system process	2	511	0.845369	0.935079	MSTRG.16085(Mapre3);Sfur006059(SLC17A7)
GO:0048468	cell development	7	1467	0.848139	0.937417	MSTRG.14617(RANBP1);MSTRG.22969(--);Sfur002079(PPP1R9A);Sfur002163(bdl);Sfur010797(Arntl);Sfur011490(ball);Sfur012506(APOD)
GO:0051336	regulation of hydrolase activity	1	291	0.849303	0.937978	MSTRG.14617(RANBP1)
GO:0051173	positive regulation of nitrogen compound metabolic process	4	919	0.851261	0.939413	Sfur000631(SPE);Sfur006776(ASH1L);Sfur009576(SS18L1);Sfur010797(Arntl)
GO:0048812	neuron projection morphogenesis	2	520	0.852421	0.939967	Sfur002079(PPP1R9A);Sfur002163(bdl)
GO:0006518	peptide metabolic process	2	521	0.853186	0.940085	Sfur000631(SPE);Sfur012973(Mipep)
GO:0051270	regulation of cellular component movement	1	296	0.854206	0.940482	Sfur012506(APOD)
GO:0097485	neuron projection guidance	1	297	0.855167	0.940816	Sfur002163(bdl)
GO:0044711	single-organism biosynthetic process	4	930	0.857854	0.942497	Sfur003978(PUDP);Sfur005629(Pigu);Sfur005767(ACAA2);Sfur009957(Upp1)
GO:0009887	organ morphogenesis	3	734	0.858016	0.942497	MSTRG.22969(--);Sfur002163(bdl);Sfur006776(ASH1L)
GO:0003008	system process	3	741	0.862482	0.946648	MSTRG.16085(Mapre3);Sfur006059(SLC17A7);Sfur007675(Gpr161)
GO:0007444	imaginal disc development	1	306	0.863545	0.946648	Sfur013880(ken)
GO:0007420	brain development	1	307	0.864446	0.946648	Sfur012506(APOD)
GO:0008380	RNA splicing	1	307	0.864446	0.946648	Sfur001080(Ppig)
GO:0045165	cell fate commitment	1	308	0.865341	0.946902	MSTRG.22969(--)
GO:0043933	macromolecular complex subunit organization	6	1321	0.866028	0.946928	MSTRG.16085(Mapre3);Sfur002079(PPP1R9A);Sfur006024(BAHD1);Sfur006776(ASH1L);Sfur009541(GF10347);Sfur011490(ball)
GO:0051239	regulation of multicellular organismal process	5	1138	0.86757	0.947888	MSTRG.14617(RANBP1);Sfur002079(PPP1R9A);Sfur007675(Gpr161);Sfur010797(Arntl);Sfur012506(APOD)
GO:0040012	regulation of locomotion	1	313	0.86973	0.949038	Sfur012506(APOD)
GO:0051640	organelle localization	1	315	0.871446	0.949038	MSTRG.16085(Mapre3)
GO:0018130	heterocycle biosynthetic process	8	1695	0.871556	0.949038	Sfur003978(PUDP);Sfur006024(BAHD1);Sfur006776(ASH1L);Sfur009576(SS18L1);Sfur009957(Upp1);Sfur010797(Arntl);Sfur013517(ATG16L1);Sfur013880(ken)
GO:0010557	positive regulation of macromolecule biosynthetic process	3	756	0.87165	0.949038	Sfur006776(ASH1L);Sfur009576(SS18L1);Sfur010797(Arntl)
GO:0031324	negative regulation of cellular metabolic process	4	955	0.871946	0.949038	MSTRG.22969(--);Sfur006024(BAHD1);Sfur006776(ASH1L);Sfur012506(APOD)
GO:0051130	positive regulation of cellular component organization	2	554	0.876543	0.952574	MSTRG.14617(RANBP1);Sfur002079(PPP1R9A)
GO:0019438	aromatic compound biosynthetic process	8	1708	0.877136	0.952574	Sfur003978(PUDP);Sfur006024(BAHD1);Sfur006776(ASH1L);Sfur009576(SS18L1);Sfur009957(Upp1);Sfur010797(Arntl);Sfur013517(ATG16L1);Sfur013880(ken)
GO:0034622	cellular macromolecular complex assembly	2	555	0.877195	0.952574	Sfur002079(PPP1R9A);Sfur009541(GF10347)
GO:0032989	cellular component morphogenesis	4	981	0.885345	0.960693	Sfur002079(PPP1R9A);Sfur002163(bdl);Sfur009576(SS18L1);Sfur011490(ball)
GO:0019222	regulation of metabolic process	14	2777	0.888452	0.962376	MSTRG.14617(RANBP1);MSTRG.22969(--);Sfur000631(SPE);Sfur002079(PPP1R9A);Sfur005841(RB1CC1);Sfur006024(BAHD1);Sfur006776(ASH1L);Sfur007675(Gpr161);Sfur008091(RB1CC1);Sfur009576(SS18L1);Sfur010067(pde-5);Sfur010797(Arntl);Sfur012506(APOD);Sfur013880(ken)
GO:0060255	regulation of macromolecule metabolic process	12	2438	0.888751	0.962376	MSTRG.22969(--);Sfur002079(PPP1R9A);Sfur005841(RB1CC1);Sfur006024(BAHD1);Sfur006776(ASH1L);Sfur007675(Gpr161);Sfur008091(RB1CC1);Sfur009576(SS18L1);Sfur010067(pde-5);Sfur010797(Arntl);Sfur012506(APOD);Sfur013880(ken)
GO:0060322	head development	1	337	0.888917	0.962376	Sfur012506(APOD)
GO:0031323	regulation of cellular metabolic process	12	2454	0.894266	0.966433	MSTRG.22969(--);Sfur000631(SPE);Sfur002079(PPP1R9A);Sfur005841(RB1CC1);Sfur006024(BAHD1);Sfur006776(ASH1L);Sfur007675(Gpr161);Sfur008091(RB1CC1);Sfur009576(SS18L1);Sfur010797(Arntl);Sfur012506(APOD);Sfur013880(ken)
GO:1901566	organonitrogen compound biosynthetic process	3	798	0.894572	0.966433	Sfur000631(SPE);Sfur003978(PUDP);Sfur009957(Upp1)
GO:0000904	cell morphogenesis involved in differentiation	2	584	0.894812	0.966433	Sfur002079(PPP1R9A);Sfur002163(bdl)
GO:0032269	negative regulation of cellular protein metabolic process	1	346	0.895372	0.966433	Sfur006776(ASH1L)
GO:0043603	cellular amide metabolic process	2	588	0.897053	0.967516	Sfur000631(SPE);Sfur012973(Mipep)
GO:0065009	regulation of molecular function	3	807	0.898991	0.968875	MSTRG.14617(RANBP1);MSTRG.22969(--);Sfur002079(PPP1R9A)
GO:0032774	RNA biosynthetic process	6	1400	0.900621	0.969583	Sfur006024(BAHD1);Sfur006776(ASH1L);Sfur009576(SS18L1);Sfur010797(Arntl);Sfur013517(ATG16L1);Sfur013880(ken)
GO:0007399	nervous system development	6	1401	0.901006	0.969583	MSTRG.14617(RANBP1);MSTRG.22969(--);Sfur002079(PPP1R9A);Sfur002163(bdl);Sfur010797(Arntl);Sfur012506(APOD)
GO:2000026	regulation of multicellular organismal development	3	815	0.902782	0.970763	MSTRG.14617(RANBP1);Sfur002079(PPP1R9A);Sfur010797(Arntl)
GO:0051093	negative regulation of developmental process	1	359	0.904049	0.971394	Sfur010797(Arntl)
GO:0006511	ubiquitin-dependent protein catabolic process	1	362	0.905949	0.972703	Sfur010797(Arntl)
GO:0043085	positive regulation of catalytic activity	1	365	0.907812	0.973971	Sfur002079(PPP1R9A)
GO:0051241	negative regulation of multicellular organismal process	1	368	0.909639	0.975198	Sfur012506(APOD)
GO:0031326	regulation of cellular biosynthetic process	7	1616	0.911231	0.976172	MSTRG.22969(--);Sfur000631(SPE);Sfur006024(BAHD1);Sfur006776(ASH1L);Sfur009576(SS18L1);Sfur010797(Arntl);Sfur013880(ken)
GO:0019941	modification-dependent protein catabolic process	1	373	0.912604	0.976911	Sfur010797(Arntl)
GO:0002376	immune system process	3	839	0.913415	0.977046	MSTRG.16085(Mapre3);Sfur000631(SPE);Sfur012506(APOD)
GO:0045935	positive regulation of nucleobase-containing compound metabolic process	3	841	0.914252	0.977179	Sfur006776(ASH1L);Sfur009576(SS18L1);Sfur010797(Arntl)
GO:0016567	protein ubiquitination	1	377	0.914908	0.977179	MSTRG.22969(--)
GO:0043632	modification-dependent macromolecule catabolic process	1	382	0.917703	0.979432	Sfur010797(Arntl)
GO:0048522	positive regulation of cellular process	10	2186	0.919444	0.980209	MSTRG.14617(RANBP1);Sfur000631(SPE);Sfur002079(PPP1R9A);Sfur005310(Ucp2);Sfur005841(RB1CC1);Sfur006776(ASH1L);Sfur007675(Gpr161);Sfur008091(RB1CC1);Sfur009576(SS18L1);Sfur010797(Arntl)
GO:0007409	axonogenesis	1	386	0.919875	0.980209	Sfur002163(bdl)
GO:0009889	regulation of biosynthetic process	7	1647	0.921179	0.980209	MSTRG.22969(--);Sfur000631(SPE);Sfur006024(BAHD1);Sfur006776(ASH1L);Sfur009576(SS18L1);Sfur010797(Arntl);Sfur013880(ken)
GO:0080090	regulation of primary metabolic process	11	2370	0.921547	0.980209	MSTRG.22969(--);Sfur002079(PPP1R9A);Sfur005841(RB1CC1);Sfur006024(BAHD1);Sfur006776(ASH1L);Sfur007675(Gpr161);Sfur008091(RB1CC1);Sfur009576(SS18L1);Sfur010797(Arntl);Sfur012506(APOD);Sfur013880(ken)
GO:0031327	negative regulation of cellular biosynthetic process	2	639	0.922047	0.980209	MSTRG.22969(--);Sfur006024(BAHD1)
GO:0044763	single-organism cellular process	37	6485	0.922951	0.980209	MSTRG.14617(RANBP1);MSTRG.14666(Stt3a);MSTRG.16085(Mapre3);MSTRG.20533(SLC16A14);MSTRG.22969(--);MSTRG.32778(ACP21);Sfur000424(CG17119);Sfur000631(SPE);Sfur000712(PEX11G);Sfur001170(IFT27);Sfur002079(PPP1R9A);Sfur002163(bdl);Sfur003398(MMAB);Sfur003483(Madm);Sfur003978(PUDP);Sfur005310(Ucp2);Sfur005629(Pigu);Sfur005767(ACAA2);Sfur005841(RB1CC1);Sfur006059(SLC17A7);Sfur006776(ASH1L);Sfur006937(LMJ…
GO:0008152	metabolic process	35	6196	0.923236	0.980209	MSTRG.14617(RANBP1);MSTRG.14666(Stt3a);MSTRG.16085(Mapre3);MSTRG.22969(--);MSTRG.29743(nas-13);MSTRG.33278(--);Sfur000631(SPE);Sfur000881(Lip1);Sfur001080(Ppig);Sfur002079(PPP1R9A);Sfur003398(MMAB);Sfur003483(Madm);Sfur003978(PUDP);Sfur005310(Ucp2);Sfur005629(Pigu);Sfur005767(ACAA2);Sfur005841(RB1CC1);Sfur006024(BAHD1);Sfur006776(ASH1L);Sfur006937(LMJF_27_0420);Sfur007675(Gpr161);Sfur008091(RB1CC…
GO:0009890	negative regulation of biosynthetic process	2	645	0.924587	0.980915	MSTRG.22969(--);Sfur006024(BAHD1)
GO:0009791	post-embryonic development	1	400	0.92704	0.982022	Sfur006776(ASH1L)
GO:0000902	cell morphogenesis	3	874	0.927074	0.982022	Sfur002079(PPP1R9A);Sfur002163(bdl);Sfur009576(SS18L1)
GO:0009892	negative regulation of metabolic process	4	1085	0.927695	0.982022	MSTRG.22969(--);Sfur006024(BAHD1);Sfur006776(ASH1L);Sfur012506(APOD)
GO:0006355	regulation of transcription, DNA-templated	5	1291	0.929387	0.982272	Sfur006024(BAHD1);Sfur006776(ASH1L);Sfur009576(SS18L1);Sfur010797(Arntl);Sfur013880(ken)
GO:0048646	anatomical structure formation involved in morphogenesis	2	658	0.929833	0.982272	Sfur011490(ball);Sfur012506(APOD)
GO:1903506	regulation of nucleic acid-templated transcription	5	1293	0.929994	0.982272	Sfur006024(BAHD1);Sfur006776(ASH1L);Sfur009576(SS18L1);Sfur010797(Arntl);Sfur013880(ken)
GO:0051603	proteolysis involved in cellular protein catabolic process	1	408	0.930848	0.9824	Sfur010797(Arntl)
GO:2001141	regulation of RNA biosynthetic process	5	1298	0.931492	0.9824	Sfur006024(BAHD1);Sfur006776(ASH1L);Sfur009576(SS18L1);Sfur010797(Arntl);Sfur013880(ken)
GO:0032446	protein modification by small protein conjugation	1	413	0.933128	0.9834	MSTRG.22969(--)
GO:0044257	cellular protein catabolic process	1	419	0.935767	0.984728	Sfur010797(Arntl)
GO:0071495	cellular response to endogenous stimulus	1	419	0.935767	0.984728	Sfur005310(Ucp2)
GO:0048869	cellular developmental process	10	2267	0.939926	0.988047	MSTRG.14617(RANBP1);MSTRG.22969(--);MSTRG.32778(ACP21);Sfur001170(IFT27);Sfur002079(PPP1R9A);Sfur002163(bdl);Sfur009576(SS18L1);Sfur010797(Arntl);Sfur011490(ball);Sfur012506(APOD)
GO:0030154	cell differentiation	9	2088	0.940305	0.988047	MSTRG.14617(RANBP1);MSTRG.22969(--);MSTRG.32778(ACP21);Sfur001170(IFT27);Sfur002079(PPP1R9A);Sfur002163(bdl);Sfur010797(Arntl);Sfur011490(ball);Sfur012506(APOD)
GO:0048518	positive regulation of biological process	11	2460	0.943122	0.989274	MSTRG.14617(RANBP1);Sfur000631(SPE);Sfur002079(PPP1R9A);Sfur005310(Ucp2);Sfur005841(RB1CC1);Sfur006776(ASH1L);Sfur007675(Gpr161);Sfur008091(RB1CC1);Sfur009576(SS18L1);Sfur010067(pde-5);Sfur010797(Arntl)
GO:0016192	vesicle-mediated transport	2	696	0.943291	0.989274	MSTRG.22969(--);Sfur003483(Madm)
GO:0044271	cellular nitrogen compound biosynthetic process	9	2105	0.944067	0.989274	Sfur000631(SPE);Sfur003978(PUDP);Sfur006024(BAHD1);Sfur006776(ASH1L);Sfur009576(SS18L1);Sfur009957(Upp1);Sfur010797(Arntl);Sfur013517(ATG16L1);Sfur013880(ken)
GO:0071310	cellular response to organic substance	2	699	0.944244	0.989274	MSTRG.14617(RANBP1);Sfur005310(Ucp2)
GO:0051128	regulation of cellular component organization	4	1150	0.946577	0.990861	MSTRG.14617(RANBP1);Sfur002079(PPP1R9A);Sfur005767(ACAA2);Sfur012506(APOD)
GO:0044093	positive regulation of molecular function	1	448	0.947146	0.990861	Sfur002079(PPP1R9A)
GO:0043043	peptide biosynthetic process	1	450	0.947854	0.990875	Sfur000631(SPE)
GO:0048858	cell projection morphogenesis	2	716	0.949368	0.991732	Sfur002079(PPP1R9A);Sfur002163(bdl)
GO:0030163	protein catabolic process	1	458	0.950591	0.992263	Sfur010797(Arntl)
GO:0006351	transcription, DNA-templated	5	1380	0.952373	0.992263	Sfur006024(BAHD1);Sfur006776(ASH1L);Sfur009576(SS18L1);Sfur010797(Arntl);Sfur013880(ken)
GO:0097659	nucleic acid-templated transcription	5	1382	0.952804	0.992263	Sfur006024(BAHD1);Sfur006776(ASH1L);Sfur009576(SS18L1);Sfur010797(Arntl);Sfur013880(ken)
GO:0071704	organic substance metabolic process	32	5888	0.952811	0.992263	MSTRG.14666(Stt3a);MSTRG.16085(Mapre3);MSTRG.22969(--);MSTRG.29743(nas-13);Sfur000631(SPE);Sfur000881(Lip1);Sfur001080(Ppig);Sfur002079(PPP1R9A);Sfur003398(MMAB);Sfur003483(Madm);Sfur003978(PUDP);Sfur005629(Pigu);Sfur005767(ACAA2);Sfur005841(RB1CC1);Sfur006024(BAHD1);Sfur006776(ASH1L);Sfur006937(LMJF_27_0420);Sfur007675(Gpr161);Sfur008091(RB1CC1);Sfur009447(Uro);Sfur009576(SS18L1);Sfur009957(Upp1…
GO:0022603	regulation of anatomical structure morphogenesis	1	467	0.953502	0.992263	Sfur002079(PPP1R9A)
GO:0032990	cell part morphogenesis	2	733	0.95405	0.992263	Sfur002079(PPP1R9A);Sfur002163(bdl)
GO:0007389	pattern specification process	1	471	0.954741	0.992263	MSTRG.22969(--)
GO:0010605	negative regulation of macromolecule metabolic process	3	978	0.95701	0.993898	Sfur006024(BAHD1);Sfur006776(ASH1L);Sfur012506(APOD)
GO:0007417	central nervous system development	1	487	0.959381	0.993901	Sfur012506(APOD)
GO:0043604	amide biosynthetic process	1	487	0.959381	0.993901	Sfur000631(SPE)
GO:0070647	protein modification by small protein conjugation or removal	1	487	0.959381	0.993901	MSTRG.22969(--)
GO:0051252	regulation of RNA metabolic process	5	1417	0.959796	0.993901	Sfur006024(BAHD1);Sfur006776(ASH1L);Sfur009576(SS18L1);Sfur010797(Arntl);Sfur013880(ken)
GO:0045892	negative regulation of transcription, DNA-templated	1	498	0.962296	0.995046	Sfur006024(BAHD1)
GO:1903507	negative regulation of nucleic acid-templated transcription	1	498	0.962296	0.995046	Sfur006024(BAHD1)
GO:1902679	negative regulation of RNA biosynthetic process	1	502	0.963304	0.995368	Sfur006024(BAHD1)
GO:0009058	biosynthetic process	13	2934	0.96409	0.99546	MSTRG.14666(Stt3a);MSTRG.22969(--);Sfur000631(SPE);Sfur003978(PUDP);Sfur005629(Pigu);Sfur005767(ACAA2);Sfur006024(BAHD1);Sfur006776(ASH1L);Sfur009576(SS18L1);Sfur009957(Upp1);Sfur010797(Arntl);Sfur013517(ATG16L1);Sfur013880(ken)
GO:0002009	morphogenesis of an epithelium	1	533	0.970271	0.999643	Sfur008722(PTK7)
GO:0051253	negative regulation of RNA metabolic process	1	534	0.970472	0.999643	Sfur006024(BAHD1)
GO:0044249	cellular biosynthetic process	12	2814	0.971173	0.999643	MSTRG.14666(Stt3a);MSTRG.22969(--);Sfur000631(SPE);Sfur003978(PUDP);Sfur005629(Pigu);Sfur006024(BAHD1);Sfur006776(ASH1L);Sfur009576(SS18L1);Sfur009957(Upp1);Sfur010797(Arntl);Sfur013517(ATG16L1);Sfur013880(ken)
GO:0044265	cellular macromolecule catabolic process	1	541	0.971846	0.999643	Sfur010797(Arntl)
GO:0050793	regulation of developmental process	3	1073	0.974052	0.999643	MSTRG.14617(RANBP1);Sfur002079(PPP1R9A);Sfur010797(Arntl)
GO:0065007	biological regulation	25	4990	0.974525	0.999643	MSTRG.14617(RANBP1);MSTRG.22969(--);MSTRG.29743(nas-13);Sfur000631(SPE);Sfur000712(PEX11G);Sfur001170(IFT27);Sfur002079(PPP1R9A);Sfur003483(Madm);Sfur005310(Ucp2);Sfur005629(Pigu);Sfur005767(ACAA2);Sfur005841(RB1CC1);Sfur006024(BAHD1);Sfur006059(SLC17A7);Sfur006776(ASH1L);Sfur007675(Gpr161);Sfur008091(RB1CC1);Sfur008722(PTK7);Sfur008868(ATOX1);Sfur009576(SS18L1);Sfur010067(pde-5);Sfur010100(BEST3…
GO:0009719	response to endogenous stimulus	1	561	0.975435	0.999643	Sfur005310(Ucp2)
GO:2000112	regulation of cellular macromolecule biosynthetic process	5	1531	0.976623	0.999643	Sfur006024(BAHD1);Sfur006776(ASH1L);Sfur009576(SS18L1);Sfur010797(Arntl);Sfur013880(ken)
GO:1901576	organic substance biosynthetic process	12	2867	0.976779	0.999643	MSTRG.14666(Stt3a);Sfur000631(SPE);Sfur003978(PUDP);Sfur005629(Pigu);Sfur005767(ACAA2);Sfur006024(BAHD1);Sfur006776(ASH1L);Sfur009576(SS18L1);Sfur009957(Upp1);Sfur010797(Arntl);Sfur013517(ATG16L1);Sfur013880(ken)
GO:0010556	regulation of macromolecule biosynthetic process	5	1549	0.978599	0.999643	Sfur006024(BAHD1);Sfur006776(ASH1L);Sfur009576(SS18L1);Sfur010797(Arntl);Sfur013880(ken)
GO:0035295	tube development	1	586	0.979294	0.999643	Sfur013880(ken)
GO:0048729	tissue morphogenesis	1	589	0.979715	0.999643	Sfur008722(PTK7)
GO:0045934	negative regulation of nucleobase-containing compound metabolic process	1	599	0.981059	0.999643	Sfur006024(BAHD1)
GO:0050789	regulation of biological process	22	4601	0.981685	0.999643	MSTRG.14617(RANBP1);MSTRG.22969(--);MSTRG.29743(nas-13);Sfur000631(SPE);Sfur001170(IFT27);Sfur002079(PPP1R9A);Sfur003483(Madm);Sfur005310(Ucp2);Sfur005629(Pigu);Sfur005767(ACAA2);Sfur005841(RB1CC1);Sfur006024(BAHD1);Sfur006776(ASH1L);Sfur007675(Gpr161);Sfur008091(RB1CC1);Sfur008722(PTK7);Sfur009576(SS18L1);Sfur010067(pde-5);Sfur010100(BEST3);Sfur010797(Arntl);Sfur012506(APOD);Sfur013880(ken)
GO:2000113	negative regulation of cellular macromolecule biosynthetic process	1	605	0.981823	0.999643	Sfur006024(BAHD1)
GO:0010558	negative regulation of macromolecule biosynthetic process	1	610	0.982436	0.999643	Sfur006024(BAHD1)
GO:0009057	macromolecule catabolic process	1	616	0.983145	0.999643	Sfur010797(Arntl)
GO:0010468	regulation of gene expression	6	1807	0.983327	0.999643	Sfur006024(BAHD1);Sfur006776(ASH1L);Sfur009576(SS18L1);Sfur010067(pde-5);Sfur010797(Arntl);Sfur013880(ken)
GO:0051171	regulation of nitrogen compound metabolic process	6	1816	0.984042	0.999643	Sfur000631(SPE);Sfur006024(BAHD1);Sfur006776(ASH1L);Sfur009576(SS18L1);Sfur010797(Arntl);Sfur013880(ken)
GO:0050794	regulation of cellular process	20	4317	0.98428	0.999643	MSTRG.14617(RANBP1);MSTRG.22969(--);Sfur000631(SPE);Sfur001170(IFT27);Sfur002079(PPP1R9A);Sfur003483(Madm);Sfur005310(Ucp2);Sfur005629(Pigu);Sfur005767(ACAA2);Sfur005841(RB1CC1);Sfur006024(BAHD1);Sfur006776(ASH1L);Sfur007675(Gpr161);Sfur008091(RB1CC1);Sfur008722(PTK7);Sfur009576(SS18L1);Sfur010067(pde-5);Sfur010797(Arntl);Sfur012506(APOD);Sfur013880(ken)
GO:0009059	macromolecule biosynthetic process	8	2231	0.985314	0.999643	MSTRG.14666(Stt3a);Sfur005629(Pigu);Sfur006024(BAHD1);Sfur006776(ASH1L);Sfur009576(SS18L1);Sfur010797(Arntl);Sfur013517(ATG16L1);Sfur013880(ken)
GO:0019219	regulation of nucleobase-containing compound metabolic process	5	1638	0.986314	0.999643	Sfur006024(BAHD1);Sfur006776(ASH1L);Sfur009576(SS18L1);Sfur010797(Arntl);Sfur013880(ken)
GO:0006396	RNA processing	1	651	0.986755	0.999643	Sfur001080(Ppig)
GO:0016070	RNA metabolic process	7	2059	0.986924	0.999643	Sfur001080(Ppig);Sfur006024(BAHD1);Sfur006776(ASH1L);Sfur009576(SS18L1);Sfur010797(Arntl);Sfur013517(ATG16L1);Sfur013880(ken)
GO:0044238	primary metabolic process	28	5601	0.986949	0.999643	MSTRG.14666(Stt3a);MSTRG.22969(--);MSTRG.29743(nas-13);Sfur000631(SPE);Sfur000881(Lip1);Sfur001080(Ppig);Sfur002079(PPP1R9A);Sfur003483(Madm);Sfur003978(PUDP);Sfur005629(Pigu);Sfur005767(ACAA2);Sfur005841(RB1CC1);Sfur006024(BAHD1);Sfur006776(ASH1L);Sfur006937(LMJF_27_0420);Sfur007675(Gpr161);Sfur008091(RB1CC1);Sfur009447(Uro);Sfur009576(SS18L1);Sfur009957(Upp1);Sfur010797(Arntl);Sfur011490(ball);…
GO:0006357	regulation of transcription from RNA polymerase II promoter	2	961	0.988155	0.999643	Sfur006776(ASH1L);Sfur009576(SS18L1)
GO:0051172	negative regulation of nitrogen compound metabolic process	1	671	0.988464	0.999643	Sfur006024(BAHD1)
GO:0009790	embryo development	1	677	0.988934	0.999643	MSTRG.16085(Mapre3)
GO:0010629	negative regulation of gene expression	1	690	0.989887	0.999643	Sfur006024(BAHD1)
GO:0043170	macromolecule metabolic process	22	4745	0.990217	0.999643	MSTRG.14666(Stt3a);MSTRG.22969(--);MSTRG.29743(nas-13);Sfur000631(SPE);Sfur001080(Ppig);Sfur002079(PPP1R9A);Sfur003483(Madm);Sfur005629(Pigu);Sfur005841(RB1CC1);Sfur006024(BAHD1);Sfur006776(ASH1L);Sfur007675(Gpr161);Sfur008091(RB1CC1);Sfur009576(SS18L1);Sfur010067(pde-5);Sfur010797(Arntl);Sfur011490(ball);Sfur011940(DppIII);Sfur012506(APOD);Sfur012973(Mipep);Sfur013517(ATG16L1);Sfur013880(ken)
GO:0044237	cellular metabolic process	28	5663	0.990258	0.999643	MSTRG.14666(Stt3a);MSTRG.16085(Mapre3);MSTRG.22969(--);Sfur000631(SPE);Sfur001080(Ppig);Sfur002079(PPP1R9A);Sfur003398(MMAB);Sfur003483(Madm);Sfur003978(PUDP);Sfur005629(Pigu);Sfur005767(ACAA2);Sfur005841(RB1CC1);Sfur006024(BAHD1);Sfur006776(ASH1L);Sfur006937(LMJF_27_0420);Sfur007675(Gpr161);Sfur008091(RB1CC1);Sfur009447(Uro);Sfur009576(SS18L1);Sfur009957(Upp1);Sfur010797(Arntl);Sfur011355(gadl1)…
GO:0010033	response to organic substance	2	999	0.990635	0.999643	MSTRG.14617(RANBP1);Sfur005310(Ucp2)
GO:0006366	transcription from RNA polymerase II promoter	2	1020	0.991784	0.999643	Sfur006776(ASH1L);Sfur009576(SS18L1)
GO:1901360	organic cyclic compound metabolic process	14	3462	0.991943	0.999643	MSTRG.16085(Mapre3);Sfur001080(Ppig);Sfur003398(MMAB);Sfur003978(PUDP);Sfur005767(ACAA2);Sfur006024(BAHD1);Sfur006776(ASH1L);Sfur006937(LMJF_27_0420);Sfur009447(Uro);Sfur009576(SS18L1);Sfur009957(Upp1);Sfur010797(Arntl);Sfur013517(ATG16L1);Sfur013880(ken)
GO:0034645	cellular macromolecule biosynthetic process	7	2199	0.993485	1	MSTRG.14666(Stt3a);Sfur005629(Pigu);Sfur006024(BAHD1);Sfur006776(ASH1L);Sfur009576(SS18L1);Sfur010797(Arntl);Sfur013880(ken)
GO:0006725	cellular aromatic compound metabolic process	13	3347	0.993959	1	MSTRG.16085(Mapre3);Sfur001080(Ppig);Sfur003398(MMAB);Sfur003978(PUDP);Sfur006024(BAHD1);Sfur006776(ASH1L);Sfur006937(LMJF_27_0420);Sfur009447(Uro);Sfur009576(SS18L1);Sfur009957(Upp1);Sfur010797(Arntl);Sfur013517(ATG16L1);Sfur013880(ken)
GO:0046483	heterocycle metabolic process	12	3277	0.996481	1	Sfur001080(Ppig);Sfur003398(MMAB);Sfur003978(PUDP);Sfur006024(BAHD1);Sfur006776(ASH1L);Sfur006937(LMJF_27_0420);Sfur009447(Uro);Sfur009576(SS18L1);Sfur009957(Upp1);Sfur010797(Arntl);Sfur013517(ATG16L1);Sfur013880(ken)
GO:0010467	gene expression	8	2610	0.997848	1	Sfur001080(Ppig);Sfur006024(BAHD1);Sfur006776(ASH1L);Sfur009576(SS18L1);Sfur010067(pde-5);Sfur010797(Arntl);Sfur012973(Mipep);Sfur013880(ken)
GO:0006139	nucleobase-containing compound metabolic process	11	3190	0.99787	1	Sfur001080(Ppig);Sfur003978(PUDP);Sfur006024(BAHD1);Sfur006776(ASH1L);Sfur006937(LMJF_27_0420);Sfur009447(Uro);Sfur009576(SS18L1);Sfur009957(Upp1);Sfur010797(Arntl);Sfur013517(ATG16L1);Sfur013880(ken)
GO:0034641	cellular nitrogen compound metabolic process	13	3672	0.998872	1	Sfur000631(SPE);Sfur001080(Ppig);Sfur003978(PUDP);Sfur006024(BAHD1);Sfur006776(ASH1L);Sfur006937(LMJF_27_0420);Sfur009447(Uro);Sfur009576(SS18L1);Sfur009957(Upp1);Sfur010797(Arntl);Sfur012973(Mipep);Sfur013517(ATG16L1);Sfur013880(ken)
GO:0006807	nitrogen compound metabolic process	14	3890	0.999102	1	Sfur000631(SPE);Sfur001080(Ppig);Sfur003398(MMAB);Sfur003978(PUDP);Sfur006024(BAHD1);Sfur006776(ASH1L);Sfur006937(LMJF_27_0420);Sfur009447(Uro);Sfur009576(SS18L1);Sfur009957(Upp1);Sfur010797(Arntl);Sfur012973(Mipep);Sfur013517(ATG16L1);Sfur013880(ken)
GO:0044260	cellular macromolecule metabolic process	17	4412	0.999149	1	MSTRG.14666(Stt3a);MSTRG.22969(--);Sfur001080(Ppig);Sfur002079(PPP1R9A);Sfur003483(Madm);Sfur005629(Pigu);Sfur005841(RB1CC1);Sfur006024(BAHD1);Sfur006776(ASH1L);Sfur007675(Gpr161);Sfur008091(RB1CC1);Sfur009576(SS18L1);Sfur010797(Arntl);Sfur011490(ball);Sfur012973(Mipep);Sfur013517(ATG16L1);Sfur013880(ken)
GO:0009987	cellular process	44	8081	0.999233	1	MSTRG.14617(RANBP1);MSTRG.14666(Stt3a);MSTRG.16085(Mapre3);MSTRG.20533(SLC16A14);MSTRG.22969(--);MSTRG.29743(nas-13);MSTRG.32778(ACP21);Sfur000424(CG17119);Sfur000631(SPE);Sfur000712(PEX11G);Sfur001080(Ppig);Sfur001170(IFT27);Sfur002079(PPP1R9A);Sfur002163(bdl);Sfur003398(MMAB);Sfur003483(Madm);Sfur003978(PUDP);Sfur005310(Ucp2);Sfur005629(Pigu);Sfur005767(ACAA2);Sfur005841(RB1CC1);Sfur006024(BAHD…
GO:0090304	nucleic acid metabolic process	7	2825	0.999824	1	Sfur001080(Ppig);Sfur006024(BAHD1);Sfur006776(ASH1L);Sfur009576(SS18L1);Sfur010797(Arntl);Sfur013517(ATG16L1);Sfur013880(ken)
GO:0008150	biological_process	57	8939	1	1	MSTRG.14617(RANBP1);MSTRG.14666(Stt3a);MSTRG.16085(Mapre3);MSTRG.20533(SLC16A14);MSTRG.22969(--);MSTRG.29743(nas-13);MSTRG.32271(CG1139);MSTRG.32769(Ccp84Ab);MSTRG.32773(ACP21);MSTRG.32778(ACP21);MSTRG.33278(--);Sfur000424(CG17119);Sfur000631(SPE);Sfur000712(PEX11G);Sfur000838(SLC26A11);Sfur000881(Lip1);Sfur001080(Ppig);Sfur001170(IFT27);Sfur002079(PPP1R9A);Sfur002163(bdl);Sfur002387(SLC17A5);Sfu…

## Sheet: PE-VS-DE  trans GO
trans.C
GO ID	Description	trans (1623)	All (9162)	pvalue	p.adjust	Genes
GO:0005576	extracellular region	303	1002	3.51292e-25	3.17216e-22	MSTRG.17552(C5);MSTRG.21722(ck);MSTRG.2266(--);MSTRG.28763(PNLIPRP1);MSTRG.28765(PNLIPRP1);MSTRG.32397(Hspa2);MSTRG.32775(ACP21);MSTRG.32805(ACP21);MSTRG.32806(ACP21);MSTRG.34003(Hsc70-3);MSTRG.34004(Hsc70-3);MSTRG.36634(IHH);Sfur000053(to);Sfur000122(--);Sfur000141(--);Sfur000151(--);Sfur000166(--);Sfur000186(--);Sfur000193(Pnliprp2);Sfur000246(--);Sfur000311(--);Sfur000315(Acy1);Sfur000318(to);…
GO:0005783	endoplasmic reticulum	228	830	1.6123e-13	7.27954e-11	MSTRG.14537(ELOVL);MSTRG.34003(Hsc70-3);MSTRG.34004(Hsc70-3);MSTRG.38817(Itpr);Sfur000047(AAEL008004);Sfur000100(CYP4C1);Sfur000111(Arsb);Sfur000209(Uggt);Sfur000238(CHERP);Sfur000240(HADHB);Sfur000268(AAEL008004);Sfur000273(AAEL008004);Sfur000286(Cyp4ac1);Sfur000301(AAEL008004);Sfur000302(Hsp90b1);Sfur000323(CYP4C1);Sfur000337(AAEL008004);Sfur000343(Alg9);Sfur000392(Hsp90b1);Sfur000400(AAEL00800…
GO:0044432	endoplasmic reticulum part	170	576	4.55579e-13	1.37129e-10	MSTRG.14537(ELOVL);MSTRG.34003(Hsc70-3);MSTRG.34004(Hsc70-3);Sfur000047(AAEL008004);Sfur000100(CYP4C1);Sfur000209(Uggt);Sfur000238(CHERP);Sfur000268(AAEL008004);Sfur000273(AAEL008004);Sfur000286(Cyp4ac1);Sfur000301(AAEL008004);Sfur000302(Hsp90b1);Sfur000323(CYP4C1);Sfur000337(AAEL008004);Sfur000343(Alg9);Sfur000392(Hsp90b1);Sfur000400(AAEL008004);Sfur000419(Calr);Sfur000572(Pdia5);Sfur000808(PLD3…
GO:0005789	endoplasmic reticulum membrane	152	513	6.39626e-12	1.44396e-09	MSTRG.14537(ELOVL);MSTRG.34003(Hsc70-3);MSTRG.34004(Hsc70-3);Sfur000047(AAEL008004);Sfur000100(CYP4C1);Sfur000238(CHERP);Sfur000268(AAEL008004);Sfur000273(AAEL008004);Sfur000286(Cyp4ac1);Sfur000301(AAEL008004);Sfur000302(Hsp90b1);Sfur000323(CYP4C1);Sfur000337(AAEL008004);Sfur000343(Alg9);Sfur000392(Hsp90b1);Sfur000400(AAEL008004);Sfur000419(Calr);Sfur000808(PLD3);Sfur000867(SEC11A);Sfur001021(Cyp…
GO:0042175	nuclear outer membrane-endoplasmic reticulum membrane network	153	525	2.22268e-11	4.01416e-09	MSTRG.14537(ELOVL);MSTRG.34003(Hsc70-3);MSTRG.34004(Hsc70-3);Sfur000047(AAEL008004);Sfur000100(CYP4C1);Sfur000238(CHERP);Sfur000268(AAEL008004);Sfur000273(AAEL008004);Sfur000286(Cyp4ac1);Sfur000301(AAEL008004);Sfur000302(Hsp90b1);Sfur000323(CYP4C1);Sfur000337(AAEL008004);Sfur000343(Alg9);Sfur000392(Hsp90b1);Sfur000400(AAEL008004);Sfur000419(Calr);Sfur000808(PLD3);Sfur000867(SEC11A);Sfur001021(Cyp…
GO:0044421	extracellular region part	156	568	1.7637e-09	2.65438e-07	MSTRG.17552(C5);MSTRG.21722(ck);MSTRG.2266(--);MSTRG.32397(Hspa2);MSTRG.32775(ACP21);MSTRG.32805(ACP21);MSTRG.32806(ACP21);MSTRG.34003(Hsc70-3);MSTRG.34004(Hsc70-3);MSTRG.36634(IHH);Sfur000053(to);Sfur000122(--);Sfur000141(--);Sfur000151(--);Sfur000166(--);Sfur000186(--);Sfur000193(Pnliprp2);Sfur000246(--);Sfur000311(--);Sfur000315(Acy1);Sfur000318(to);Sfur000349(to);Sfur000352(--);Sfur000393(to)…
GO:0005615	extracellular space	94	311	2.84633e-08	3.67177e-06	Sfur000053(to);Sfur000122(--);Sfur000141(--);Sfur000151(--);Sfur000166(--);Sfur000186(--);Sfur000193(Pnliprp2);Sfur000246(--);Sfur000311(--);Sfur000318(to);Sfur000349(to);Sfur000352(--);Sfur000393(to);Sfur000398(PNLIPRP2);Sfur000419(Calr);Sfur000426(--);Sfur000608(Klkb1);Sfur001151(PDIA3);Sfur001295(tsl);Sfur001572(tsl);Sfur001745(--);Sfur001898(Gabbr1);Sfur002072(Ppt1);Sfur002558(Pdi);Sfur002672…
GO:0099513	polymeric cytoskeletal fiber	77	259	1.06719e-06	0.000120459	MSTRG.16085(Mapre3);MSTRG.36688(UPP2);Sfur000095(polo);Sfur000269(alphaTub84B);Sfur000345(--);Sfur000616(TUBB4B);Sfur000619(Dhc64C);Sfur000821(DCXR);Sfur000852(DCXR);Sfur001116(ctp);Sfur001301(Dnah1);Sfur001362(--);Sfur001563(GAS2L3);Sfur002272(alphaTub84B);Sfur002283(CG14535);Sfur002413(Tekt2);Sfur002673(TUBB4B);Sfur002696(alphaTub84B);Sfur002884(NINL);Sfur002888(Slc8a1);Sfur002967(DNAI2);Sfur00…
GO:0099512	supramolecular fiber	77	260	1.25937e-06	0.000126357	MSTRG.16085(Mapre3);MSTRG.36688(UPP2);Sfur000095(polo);Sfur000269(alphaTub84B);Sfur000345(--);Sfur000616(TUBB4B);Sfur000619(Dhc64C);Sfur000821(DCXR);Sfur000852(DCXR);Sfur001116(ctp);Sfur001301(Dnah1);Sfur001362(--);Sfur001563(GAS2L3);Sfur002272(alphaTub84B);Sfur002283(CG14535);Sfur002413(Tekt2);Sfur002673(TUBB4B);Sfur002696(alphaTub84B);Sfur002884(NINL);Sfur002888(Slc8a1);Sfur002967(DNAI2);Sfur00…
GO:0005874	microtubule	68	224	2.01774e-06	0.000182202	MSTRG.16085(Mapre3);Sfur000095(polo);Sfur000269(alphaTub84B);Sfur000345(--);Sfur000616(TUBB4B);Sfur000619(Dhc64C);Sfur000821(DCXR);Sfur000852(DCXR);Sfur001116(ctp);Sfur001301(Dnah1);Sfur001362(--);Sfur001563(GAS2L3);Sfur002272(alphaTub84B);Sfur002283(CG14535);Sfur002413(Tekt2);Sfur002673(TUBB4B);Sfur002696(alphaTub84B);Sfur002884(NINL);Sfur002888(Slc8a1);Sfur002967(DNAI2);Sfur003040(Kif23);Sfur00…
GO:0031227	intrinsic component of endoplasmic reticulum membrane	36	97	4.07053e-06	0.000334154	MSTRG.14537(ELOVL);MSTRG.34003(Hsc70-3);MSTRG.34004(Hsc70-3);Sfur000047(AAEL008004);Sfur000268(AAEL008004);Sfur000273(AAEL008004);Sfur000301(AAEL008004);Sfur000337(AAEL008004);Sfur000400(AAEL008004);Sfur001151(PDIA3);Sfur001418(AAEL008004);Sfur001468(ELOVL4);Sfur002488(Elovl7);Sfur004484(Hm13);Sfur005031(Dad1);Sfur005057(DERL1);Sfur005244(ELOVL);Sfur005629(Pigu);Sfur006731(ELOVL4);Sfur008226(DOLP…
GO:0051233	spindle midzone	12	18	5.93279e-06	0.000446442	Sfur000095(polo);Sfur002371(Gem);Sfur005167(KIF20B);Sfur008714(Kif18a);Sfur008921(Rcc2);Sfur009036(plk1);Sfur009486(CDC6);Sfur010114(sqh);Sfur012148(plk1);Sfur012861(Cenpe);Sfur013467(Rif1);Sfur013901(--)
GO:0030176	integral component of endoplasmic reticulum membrane	33	90	1.36625e-05	0.000949018	Sfur000047(AAEL008004);Sfur000268(AAEL008004);Sfur000273(AAEL008004);Sfur000301(AAEL008004);Sfur000337(AAEL008004);Sfur000400(AAEL008004);Sfur001151(PDIA3);Sfur001418(AAEL008004);Sfur001468(ELOVL4);Sfur002488(Elovl7);Sfur004484(Hm13);Sfur005031(Dad1);Sfur005057(DERL1);Sfur005244(ELOVL);Sfur005629(Pigu);Sfur006731(ELOVL4);Sfur008226(DOLPP1);Sfur008433(CLN3);Sfur008723(PIGT);Sfur011425(--);Sfur0114…
GO:0044430	cytoskeletal part	166	717	7.08587e-05	0.00443257	MSTRG.14617(RANBP1);MSTRG.16085(Mapre3);MSTRG.21722(ck);MSTRG.36688(UPP2);Sfur000095(polo);Sfur000109(ddx11);Sfur000243(Tbl1x);Sfur000269(alphaTub84B);Sfur000294(EFHC2);Sfur000345(--);Sfur000386(--);Sfur000547(--);Sfur000565(SNX4);Sfur000616(TUBB4B);Sfur000619(Dhc64C);Sfur000626(Tmod1);Sfur000736(--);Sfur000804(--);Sfur000821(DCXR);Sfur000852(DCXR);Sfur000902(Mlc1);Sfur000970(zip);Sfur000977(Wdr1…
GO:0042579	microbody	38	117	7.36307e-05	0.00443257	MSTRG.10604(dnm1l);Sfur000157(HAO1);Sfur000712(PEX11G);Sfur001025(wat);Sfur001132(urad);Sfur001691(Pex16);Sfur001994(--);Sfur002158(dnm1l);Sfur002862(Far1);Sfur002897(Eci2);Sfur003182(SOD1);Sfur003650(DNM1L);Sfur004749(PEX11A);Sfur005193(Mvd);Sfur005777(Pnpla8);Sfur006389(wat);Sfur006756(CG5065);Sfur006772(wat);Sfur006951(CG5065);Sfur006953(CG8306);Sfur007726(CG5065);Sfur008342(wat);Sfur008351(wa…
GO:0098588	bounding membrane of organelle	273	1265	8.37954e-05	0.0047292	MSTRG.14537(ELOVL);MSTRG.21722(ck);MSTRG.34003(Hsc70-3);MSTRG.34004(Hsc70-3);MSTRG.38817(Itpr);Sfur000035(csbC);Sfur000047(AAEL008004);Sfur000079(RRAGA);Sfur000100(CYP4C1);Sfur000193(Pnliprp2);Sfur000238(CHERP);Sfur000240(HADHB);Sfur000268(AAEL008004);Sfur000273(AAEL008004);Sfur000286(Cyp4ac1);Sfur000301(AAEL008004);Sfur000302(Hsp90b1);Sfur000323(CYP4C1);Sfur000337(AAEL008004);Sfur000343(Alg9);Sf…
GO:0005777	peroxisome	37	116	0.00013895	0.00738069	Sfur000157(HAO1);Sfur000712(PEX11G);Sfur001025(wat);Sfur001132(urad);Sfur001691(Pex16);Sfur001994(--);Sfur002158(dnm1l);Sfur002862(Far1);Sfur002897(Eci2);Sfur003182(SOD1);Sfur003650(DNM1L);Sfur004749(PEX11A);Sfur005193(Mvd);Sfur005777(Pnpla8);Sfur006389(wat);Sfur006756(CG5065);Sfur006772(wat);Sfur006951(CG5065);Sfur006953(CG8306);Sfur007726(CG5065);Sfur008342(wat);Sfur008351(wat);Sfur008657(Amacr…
GO:0005791	rough endoplasmic reticulum	14	30	0.000241004	0.0120904	Sfur000111(Arsb);Sfur000209(Uggt);Sfur002558(Pdi);Sfur004484(Hm13);Sfur005985(Sec63);Sfur006380(SEC61A2);Sfur006724(Pcsk1);Sfur006915(Uggt);Sfur008174(Arsb);Sfur008961(SEC61B);Sfur009020(Arsb);Sfur009100(Arsb);Sfur009114(ARSI);Sfur013903(--)
GO:0005788	endoplasmic reticulum lumen	21	56	0.000343488	0.0154234	Sfur000209(Uggt);Sfur000302(Hsp90b1);Sfur000392(Hsp90b1);Sfur000419(Calr);Sfur000572(Pdia5);Sfur001151(PDIA3);Sfur001250(calub);Sfur002558(Pdi);Sfur002836(Sumf1);Sfur003263(Erp44);Sfur004229(Eppin);Sfur004647(PPIB);Sfur006371(hyou1);Sfur006915(Uggt);Sfur008374(ARSJ);Sfur008588(Eogt);Sfur010039(AGAP012208);Sfur010228(FKBP14);Sfur012920(--);Sfur013111(CaBP1);Sfur013903(--)
GO:0012505	endomembrane system	379	1852	0.000346317	0.0154234	MSTRG.14537(ELOVL);MSTRG.14617(RANBP1);MSTRG.23723(lva);MSTRG.34003(Hsc70-3);MSTRG.34004(Hsc70-3);MSTRG.38817(Itpr);Sfur000035(csbC);Sfur000047(AAEL008004);Sfur000070(pola1);Sfur000079(RRAGA);Sfur000095(polo);Sfur000100(CYP4C1);Sfur000111(Arsb);Sfur000112(ZMYND8);Sfur000193(Pnliprp2);Sfur000209(Uggt);Sfur000238(CHERP);Sfur000240(HADHB);Sfur000268(AAEL008004);Sfur000273(AAEL008004);Sfur000286(Cyp4…
GO:0000779	condensed chromosome, centromeric region	18	45	0.000358684	0.0154234	Sfur000038(BUB1);Sfur000095(polo);Sfur001100(--);Sfur003408(Mad2l1);Sfur004029(ppp1cc-a);Sfur004157(ppp1cc-a);Sfur004764(RANGAP1);Sfur005835(mit(1)15);Sfur007624(--);Sfur008141(INCENP);Sfur009752(BIRC6);Sfur011952(NCAPG);Sfur012861(Cenpe);Sfur013570(Ncapd3);Sfur013711(NCAPG);Sfur013901(--);Sfur014246(NCAPD2);Sfur015321(--)
GO:0015630	microtubule cytoskeleton	141	619	0.000535909	0.0214905	MSTRG.10604(dnm1l);MSTRG.14617(RANBP1);MSTRG.16085(Mapre3);Sfur000095(polo);Sfur000109(ddx11);Sfur000243(Tbl1x);Sfur000269(alphaTub84B);Sfur000294(EFHC2);Sfur000345(--);Sfur000386(--);Sfur000547(--);Sfur000560(Tekt4);Sfur000565(SNX4);Sfur000616(TUBB4B);Sfur000619(Dhc64C);Sfur000736(--);Sfur000821(DCXR);Sfur000852(DCXR);Sfur000977(Wdr13);Sfur001116(ctp);Sfur001301(Dnah1);Sfur001320(cep135);Sfur001…
GO:0000796	condensin complex	6	8	0.000618773	0.0214905	Sfur001825(--);Sfur005178(SMC2);Sfur011952(NCAPG);Sfur013570(Ncapd3);Sfur013711(NCAPG);Sfur014246(NCAPD2)
GO:0008250	oligosaccharyltransferase complex	6	8	0.000618773	0.0214905	Sfur005031(Dad1);Sfur007924(RPN1);Sfur010129(TMEM258);Sfur011285(Stt3b);Sfur013406(RPN2);Sfur014350(RPN1)
GO:0070938	contractile ring	6	8	0.000618773	0.0214905	Sfur000804(--);Sfur000970(zip);Sfur005167(KIF20B);Sfur007859(scra);Sfur010114(sqh);Sfur014357(zip)
GO:1990023	mitotic spindle midzone	6	8	0.000618773	0.0214905	Sfur000095(polo);Sfur005167(KIF20B);Sfur008714(Kif18a);Sfur008921(Rcc2);Sfur012861(Cenpe);Sfur013901(--)
GO:0000775	chromosome, centromeric region	32	104	0.000773344	0.0258641	MSTRG.36572(smc1a);Sfur000038(BUB1);Sfur000095(polo);Sfur000619(Dhc64C);Sfur001100(--);Sfur001142(Esco2);Sfur003408(Mad2l1);Sfur004029(ppp1cc-a);Sfur004157(ppp1cc-a);Sfur004764(RANGAP1);Sfur004856(CBX1);Sfur005835(mit(1)15);Sfur007624(--);Sfur008141(INCENP);Sfur008312(aurkb-a);Sfur008639(dscc1);Sfur008714(Kif18a);Sfur008806(XNP);Sfur008921(Rcc2);Sfur009036(plk1);Sfur009752(BIRC6);Sfur009804(wdhd1…
GO:0005826	actomyosin contractile ring	5	6	0.000887998	0.0286379	Sfur000804(--);Sfur000970(zip);Sfur007859(scra);Sfur010114(sqh);Sfur014357(zip)
GO:0034663	endoplasmic reticulum chaperone complex	4	4	0.000981727	0.0305689	Sfur000302(Hsp90b1);Sfur000392(Hsp90b1);Sfur004647(PPIB);Sfur006371(hyou1)
GO:0005819	spindle	51	192	0.00131857	0.039689	MSTRG.16085(Mapre3);Sfur000095(polo);Sfur000109(ddx11);Sfur000243(Tbl1x);Sfur000269(alphaTub84B);Sfur000294(EFHC2);Sfur000345(--);Sfur000386(--);Sfur002272(alphaTub84B);Sfur002323(Mak);Sfur002371(Gem);Sfur002696(alphaTub84B);Sfur003040(Kif23);Sfur003374(--);Sfur003408(Mad2l1);Sfur004421(Mzt1);Sfur004627(Stag1);Sfur004764(RANGAP1);Sfur004856(CBX1);Sfur005101(CDK5RAP2);Sfur005167(KIF20B);Sfur005835…
GO:0005856	cytoskeleton	205	963	0.0014927	0.0424892	MSTRG.10604(dnm1l);MSTRG.14617(RANBP1);MSTRG.16085(Mapre3);MSTRG.21722(ck);MSTRG.36688(UPP2);Sfur000095(polo);Sfur000109(ddx11);Sfur000219(FLNA);Sfur000243(Tbl1x);Sfur000269(alphaTub84B);Sfur000294(EFHC2);Sfur000345(--);Sfur000363(cfap300);Sfur000386(--);Sfur000547(--);Sfur000560(Tekt4);Sfur000565(SNX4);Sfur000616(TUBB4B);Sfur000619(Dhc64C);Sfur000626(Tmod1);Sfur000736(--);Sfur000804(--);Sfur0008…
GO:0042555	MCM complex	6	9	0.00157739	0.0424892	Sfur000071(Mcm7);Sfur000145(Mcm7);Sfur002315(dpa);Sfur011647(Mcm5);Sfur013773(Mcm3);Sfur015063(Mcm2)
GO:0000777	condensed chromosome kinetochore	14	35	0.00159547	0.0424892	Sfur000038(BUB1);Sfur000095(polo);Sfur001100(--);Sfur003408(Mad2l1);Sfur004029(ppp1cc-a);Sfur004157(ppp1cc-a);Sfur004764(RANGAP1);Sfur005835(mit(1)15);Sfur007624(--);Sfur008141(INCENP);Sfur009752(BIRC6);Sfur012861(Cenpe);Sfur013901(--);Sfur015321(--)
GO:0000776	kinetochore	21	62	0.00159982	0.0424892	MSTRG.36572(smc1a);Sfur000038(BUB1);Sfur000095(polo);Sfur000619(Dhc64C);Sfur001100(--);Sfur003408(Mad2l1);Sfur004029(ppp1cc-a);Sfur004157(ppp1cc-a);Sfur004764(RANGAP1);Sfur005835(mit(1)15);Sfur007624(--);Sfur008141(INCENP);Sfur008714(Kif18a);Sfur009036(plk1);Sfur009752(BIRC6);Sfur012148(plk1);Sfur012839(Dhc64C);Sfur012861(Cenpe);Sfur013901(--);Sfur014629(ttk);Sfur015321(--)
GO:0031514	motile cilium	28	92	0.00192498	0.0496424	Sfur000363(cfap300);Sfur000560(Tekt4);Sfur000736(--);Sfur000792(CFAP52);Sfur001170(IFT27);Sfur001301(Dnah1);Sfur001591(SLC9C1);Sfur001804(TEKT3);Sfur001975(ccdc103);Sfur002318(Ift172);Sfur002323(Mak);Sfur002511(--);Sfur003548(SEPTIN4);Sfur004150(Ptchd3);Sfur004371(Tssk4);Sfur004446(--);Sfur006079(Cfap61);Sfur010453(Dnah17);Sfur010527(gas8);Sfur011276(Tcte1);Sfur011670(AK7);Sfur011750(Gas8);Sfur01…
GO:0072686	mitotic spindle	21	63	0.00200648	0.0496424	Sfur000095(polo);Sfur000243(Tbl1x);Sfur000294(EFHC2);Sfur000345(--);Sfur002323(Mak);Sfur002371(Gem);Sfur003040(Kif23);Sfur003374(--);Sfur003408(Mad2l1);Sfur004627(Stag1);Sfur004764(RANGAP1);Sfur005167(KIF20B);Sfur007057(Wdr62);Sfur008317(Golga2);Sfur008714(Kif18a);Sfur008921(Rcc2);Sfur009121(nesd);Sfur010875(Cdc14a);Sfur011203(Klp61F);Sfur012861(Cenpe);Sfur013901(--)
GO:0030864	cortical actin cytoskeleton	11	25	0.00203407	0.0496424	Sfur000626(Tmod1);Sfur000804(--);Sfur000970(zip);Sfur000982(l(2)gl);Sfur002079(PPP1R9A);Sfur004373(Iqgap1);Sfur007859(scra);Sfur009051(Lancl2);Sfur010114(sqh);Sfur010434(fgt-1);Sfur014357(zip)
GO:0016514	SWI/SNF complex	6	10	0.00335323	0.0772899	Sfur003025(ACTL6B);Sfur006908(Bap60);Sfur009576(SS18L1);Sfur011893(SMARCC2);Sfur014542(osa);Sfur014709(brm)
GO:0031224	intrinsic component of membrane	475	2430	0.00335644	0.0772899	MSTRG.14537(ELOVL);MSTRG.14666(Stt3a);MSTRG.15448(Calcrl);MSTRG.1598(AAEL008004);MSTRG.17552(C5);MSTRG.2266(--);MSTRG.32264(CG1139);MSTRG.32447(NINJ1);MSTRG.34003(Hsc70-3);MSTRG.34004(Hsc70-3);MSTRG.36382(SLC25A27);MSTRG.38817(Itpr);MSTRG.8273(GPAA1);Sfur000035(csbC);Sfur000047(AAEL008004);Sfur000082(stan);Sfur000117(l(2)03659);Sfur000224(NLGN4Y);Sfur000262(Nnt);Sfur000268(AAEL008004);Sfur000273(…
GO:0031261	DNA replication preinitiation complex	7	13	0.0034237	0.0772899	Sfur000071(Mcm7);Sfur000145(Mcm7);Sfur002315(dpa);Sfur011647(Mcm5);Sfur013773(Mcm3);Sfur015063(Mcm2);Sfur015375(Orc3)
GO:0005881	cytoplasmic microtubule	14	38	0.00393459	0.0841998	Sfur000269(alphaTub84B);Sfur000345(--);Sfur000619(Dhc64C);Sfur000821(DCXR);Sfur000852(DCXR);Sfur001362(--);Sfur002272(alphaTub84B);Sfur002696(alphaTub84B);Sfur005022(tmem214-a);Sfur008714(Kif18a);Sfur009752(BIRC6);Sfur012839(Dhc64C);Sfur013114(cep162);Sfur013303(CFAP20)
GO:0036126	sperm flagellum	14	38	0.00393459	0.0841998	Sfur000560(Tekt4);Sfur001170(IFT27);Sfur001301(Dnah1);Sfur001804(TEKT3);Sfur002318(Ift172);Sfur002511(--);Sfur004150(Ptchd3);Sfur004371(Tssk4);Sfur004446(--);Sfur011276(Tcte1);Sfur011750(Gas8);Sfur011838(Dnajb13);Sfur013083(Spag6);Sfur015342(--)
GO:0016021	integral component of membrane	453	2315	0.00400951	0.0841998	MSTRG.15448(Calcrl);Sfur000035(csbC);Sfur000047(AAEL008004);Sfur000082(stan);Sfur000117(l(2)03659);Sfur000224(NLGN4Y);Sfur000262(Nnt);Sfur000268(AAEL008004);Sfur000273(AAEL008004);Sfur000297(AGAP006244);Sfur000301(AAEL008004);Sfur000322(SLC2A7);Sfur000330(D11DS);Sfur000336(slc20a1-a);Sfur000337(AAEL008004);Sfur000343(Alg9);Sfur000347(NNT);Sfur000400(AAEL008004);Sfur000422(SLC18B1);Sfur000424(CG17…
GO:0005787	signal peptidase complex	4	5	0.00421441	0.0845693	Sfur000867(SEC11A);Sfur001681(Spase22-23);Sfur008193(spcs2);Sfur009184(spcs2)
GO:0035060	brahma complex	4	5	0.00421441	0.0845693	Sfur001869(Act5C);Sfur006908(Bap60);Sfur014542(osa);Sfur014709(brm)
GO:0030496	midbody	26	89	0.00506556	0.0994392	Sfur000095(polo);Sfur000109(ddx11);Sfur000302(Hsp90b1);Sfur000392(Hsp90b1);Sfur002323(Mak);Sfur002371(Gem);Sfur003040(Kif23);Sfur004029(ppp1cc-a);Sfur004157(ppp1cc-a);Sfur004373(Iqgap1);Sfur005167(KIF20B);Sfur008141(INCENP);Sfur008312(aurkb-a);Sfur008501(SCCPDH);Sfur008921(Rcc2);Sfur009036(plk1);Sfur009105(LAP3);Sfur009121(nesd);Sfur009752(BIRC6);Sfur010114(sqh);Sfur011083(pik3c3);Sfur011189(kif4…
GO:0060102	collagen and cuticulin-based cuticle extracellular matrix	3	3	0.00555039	0.106638	Sfur007492(--);Sfur013084(--);Sfur013442(--)
GO:0031300	intrinsic component of organelle membrane	55	225	0.00618463	0.113541	MSTRG.14537(ELOVL);MSTRG.34003(Hsc70-3);MSTRG.34004(Hsc70-3);Sfur000047(AAEL008004);Sfur000268(AAEL008004);Sfur000273(AAEL008004);Sfur000301(AAEL008004);Sfur000337(AAEL008004);Sfur000400(AAEL008004);Sfur000702(Svopl);Sfur000712(PEX11G);Sfur001151(PDIA3);Sfur001418(AAEL008004);Sfur001468(ELOVL4);Sfur001691(Pex16);Sfur001994(--);Sfur002175(pip);Sfur002488(Elovl7);Sfur002862(Far1);Sfur003756(slc17a8…
GO:0045172	germline ring canal	6	11	0.00627738	0.113541	MSTRG.21722(ck);Sfur002202(Src64B);Sfur002767(Src64B);Sfur007859(scra);Sfur009121(nesd);Sfur010114(sqh)
GO:0097223	sperm part	18	56	0.00628689	0.113541	Sfur000560(Tekt4);Sfur000821(DCXR);Sfur001170(IFT27);Sfur001301(Dnah1);Sfur001804(TEKT3);Sfur002318(Ift172);Sfur002511(--);Sfur004150(Ptchd3);Sfur004371(Tssk4);Sfur004446(--);Sfur006631(Sv2b);Sfur011276(Tcte1);Sfur011750(Gas8);Sfur011838(Dnajb13);Sfur013083(Spag6);Sfur013979(TSSK2);Sfur014686(Atp6v1e2);Sfur015342(--)
GO:0048770	pigment granule	16	48	0.00660271	0.116907	MSTRG.21722(ck);MSTRG.32397(Hspa2);MSTRG.34003(Hsc70-3);MSTRG.34004(Hsc70-3);Sfur000302(Hsp90b1);Sfur000392(Hsp90b1);Sfur001151(PDIA3);Sfur001250(calub);Sfur002528(Fasn);Sfur003819(Cd63);Sfur004647(PPIB);Sfur007556(RAB29);Sfur007924(RPN1);Sfur009790(Ganab);Sfur012400(GGH);Sfur014350(RPN1)
GO:0044425	membrane part	576	3020	0.00939384	0.160873	MSTRG.14537(ELOVL);MSTRG.14666(Stt3a);MSTRG.14814(SLC2A3);MSTRG.14815(SLC2A3);MSTRG.15448(Calcrl);MSTRG.1598(AAEL008004);MSTRG.17552(C5);MSTRG.2266(--);MSTRG.32264(CG1139);MSTRG.3233(SI);MSTRG.32447(NINJ1);MSTRG.34003(Hsc70-3);MSTRG.34004(Hsc70-3);MSTRG.36382(SLC25A27);MSTRG.36634(IHH);MSTRG.38817(Itpr);MSTRG.8273(GPAA1);Sfur000035(csbC);Sfur000047(AAEL008004);Sfur000079(RRAGA);Sfur000082(stan);S…
GO:0031301	integral component of organelle membrane	52	215	0.00944215	0.160873	Sfur000047(AAEL008004);Sfur000268(AAEL008004);Sfur000273(AAEL008004);Sfur000301(AAEL008004);Sfur000337(AAEL008004);Sfur000400(AAEL008004);Sfur000702(Svopl);Sfur000712(PEX11G);Sfur001151(PDIA3);Sfur001418(AAEL008004);Sfur001468(ELOVL4);Sfur001691(Pex16);Sfur001994(--);Sfur002175(pip);Sfur002488(Elovl7);Sfur002862(Far1);Sfur003756(slc17a8);Sfur004484(Hm13);Sfur004749(PEX11A);Sfur004996(to);Sfur0050…
GO:0005779	integral component of peroxisomal membrane	10	26	0.0100499	0.168057	Sfur000712(PEX11G);Sfur001691(Pex16);Sfur001994(--);Sfur002862(Far1);Sfur004749(PEX11A);Sfur006756(CG5065);Sfur006951(CG5065);Sfur007726(CG5065);Sfur009043(CG5065);Sfur010174(CG5065)
GO:0071162	CMG complex	6	12	0.010691	0.17216	Sfur000071(Mcm7);Sfur000145(Mcm7);Sfur002315(dpa);Sfur011647(Mcm5);Sfur013773(Mcm3);Sfur015063(Mcm2)
GO:0000235	astral microtubule	4	6	0.0108672	0.17216	Sfur000269(alphaTub84B);Sfur002272(alphaTub84B);Sfur002696(alphaTub84B);Sfur008714(Kif18a)
GO:0071565	nBAF complex	4	6	0.0108672	0.17216	Sfur003025(ACTL6B);Sfur006908(Bap60);Sfur011893(SMARCC2);Sfur014542(osa)
GO:0005790	smooth endoplasmic reticulum	5	9	0.0116233	0.17493	Sfur000302(Hsp90b1);Sfur000392(Hsp90b1);Sfur005445(PRDX4);Sfur009965(Itpr);Sfur010881(--)
GO:0005818	aster	5	9	0.0116233	0.17493	Sfur000269(alphaTub84B);Sfur002272(alphaTub84B);Sfur002696(alphaTub84B);Sfur008714(Kif18a);Sfur011203(Klp61F)
GO:0032426	stereocilium tip	5	9	0.0116233	0.17493	Sfur004335(MYO3A);Sfur005992(Cad87A);Sfur008404(WHRN);Sfur010875(Cdc14a);Sfur013669(Cdh23)
GO:0005778	peroxisomal membrane	15	47	0.0129343	0.188382	Sfur000712(PEX11G);Sfur001691(Pex16);Sfur001994(--);Sfur002862(Far1);Sfur004749(PEX11A);Sfur005777(Pnpla8);Sfur006756(CG5065);Sfur006951(CG5065);Sfur007726(CG5065);Sfur009043(CG5065);Sfur010174(CG5065);Sfur010521(ABCD);Sfur012982(Acsl1);Sfur013917(--);Sfur014193(--)
GO:0031903	microbody membrane	15	47	0.0129343	0.188382	Sfur000712(PEX11G);Sfur001691(Pex16);Sfur001994(--);Sfur002862(Far1);Sfur004749(PEX11A);Sfur005777(Pnpla8);Sfur006756(CG5065);Sfur006951(CG5065);Sfur007726(CG5065);Sfur009043(CG5065);Sfur010174(CG5065);Sfur010521(ABCD);Sfur012982(Acsl1);Sfur013917(--);Sfur014193(--)
GO:0030134	ER to Golgi transport vesicle	11	31	0.0138345	0.191031	Sfur004450(TMED6);Sfur004863(SEC24C);Sfur006992(TMED2);Sfur007273(LMAN1);Sfur008317(Golga2);Sfur008580(ERGIC2);Sfur009541(GF10347);Sfur010881(--);Sfur011598(Pdcd6);Sfur012403(SEC31A);Sfur014927(SEC16A)
GO:0016529	sarcoplasmic reticulum	7	16	0.0139624	0.191031	Sfur000238(CHERP);Sfur000302(Hsp90b1);Sfur000392(Hsp90b1);Sfur001250(calub);Sfur003765(--);Sfur005596(Ank3);Sfur009965(Itpr)
GO:0044815	DNA packaging complex	7	16	0.0139624	0.191031	Sfur001825(--);Sfur005178(SMC2);Sfur005278(H2AZ2);Sfur011952(NCAPG);Sfur013570(Ncapd3);Sfur013711(NCAPG);Sfur014246(NCAPD2)
GO:0090544	BAF-type complex	7	16	0.0139624	0.191031	Sfur001869(Act5C);Sfur003025(ACTL6B);Sfur006908(Bap60);Sfur009576(SS18L1);Sfur011893(SMARCC2);Sfur014542(osa);Sfur014709(brm)
GO:0016528	sarcoplasm	8	20	0.0160287	0.20782	Sfur000219(FLNA);Sfur000238(CHERP);Sfur000302(Hsp90b1);Sfur000392(Hsp90b1);Sfur001250(calub);Sfur003765(--);Sfur005596(Ank3);Sfur009965(Itpr)
GO:0032993	protein-DNA complex	18	61	0.0161101	0.20782	MSTRG.9032(Mcm6);MSTRG.9036(Mcm6);Sfur000070(pola1);Sfur000071(Mcm7);Sfur000145(Mcm7);Sfur002315(dpa);Sfur005278(H2AZ2);Sfur005462(RpA-70);Sfur007731(Kdm5a);Sfur008184(DNApol-delta);Sfur008486(DNApol-alpha60);Sfur009691(DNApol-delta);Sfur010285(POLE3);Sfur011216(Pole);Sfur011647(Mcm5);Sfur013773(Mcm3);Sfur015063(Mcm2);Sfur015375(Orc3)
GO:0044438	microbody part	18	61	0.0161101	0.20782	Sfur000157(HAO1);Sfur000712(PEX11G);Sfur001691(Pex16);Sfur001994(--);Sfur002862(Far1);Sfur002897(Eci2);Sfur004749(PEX11A);Sfur005193(Mvd);Sfur005777(Pnpla8);Sfur006756(CG5065);Sfur006951(CG5065);Sfur007726(CG5065);Sfur009043(CG5065);Sfur010174(CG5065);Sfur010521(ABCD);Sfur012982(Acsl1);Sfur013917(--);Sfur014193(--)
GO:0044439	peroxisomal part	18	61	0.0161101	0.20782	Sfur000157(HAO1);Sfur000712(PEX11G);Sfur001691(Pex16);Sfur001994(--);Sfur002862(Far1);Sfur002897(Eci2);Sfur004749(PEX11A);Sfur005193(Mvd);Sfur005777(Pnpla8);Sfur006756(CG5065);Sfur006951(CG5065);Sfur007726(CG5065);Sfur009043(CG5065);Sfur010174(CG5065);Sfur010521(ABCD);Sfur012982(Acsl1);Sfur013917(--);Sfur014193(--)
GO:0031231	intrinsic component of peroxisomal membrane	10	28	0.0177169	0.219173	Sfur000712(PEX11G);Sfur001691(Pex16);Sfur001994(--);Sfur002862(Far1);Sfur004749(PEX11A);Sfur006756(CG5065);Sfur006951(CG5065);Sfur007726(CG5065);Sfur009043(CG5065);Sfur010174(CG5065)
GO:0043596	nuclear replication fork	10	28	0.0177169	0.219173	Sfur000070(pola1);Sfur000171(--);Sfur001206(Timeless);Sfur005462(RpA-70);Sfur008184(DNApol-delta);Sfur008486(DNApol-alpha60);Sfur009691(DNApol-delta);Sfur009804(wdhd1);Sfur010285(POLE3);Sfur011216(Pole)
GO:0000793	condensed chromosome	25	93	0.0177183	0.219173	MSTRG.36572(smc1a);Sfur000038(BUB1);Sfur000095(polo);Sfur001100(--);Sfur001825(--);Sfur003408(Mad2l1);Sfur004029(ppp1cc-a);Sfur004157(ppp1cc-a);Sfur004627(Stag1);Sfur004764(RANGAP1);Sfur005178(SMC2);Sfur005835(mit(1)15);Sfur007624(--);Sfur008141(INCENP);Sfur009752(BIRC6);Sfur011952(NCAPG);Sfur012861(Cenpe);Sfur013467(Rif1);Sfur013570(Ncapd3);Sfur013711(NCAPG);Sfur013816(FANCD2);Sfur013892(rad50);…
GO:0032133	chromosome passenger complex	3	4	0.0192564	0.223636	Sfur008141(INCENP);Sfur008312(aurkb-a);Sfur009752(BIRC6)
GO:0036387	pre-replicative complex	3	4	0.0192564	0.223636	MSTRG.9032(Mcm6);MSTRG.9036(Mcm6);Sfur015375(Orc3)
GO:0042589	zymogen granule membrane	3	4	0.0192564	0.223636	Sfur000193(Pnliprp2);Sfur002850(PNLIP);Sfur006992(TMED2)
GO:0043190	ATP-binding cassette (ABC) transporter complex	3	4	0.0192564	0.223636	Sfur010345(abcG23);Sfur012519(abcG23);Sfur014302(ABCB6)
GO:0005930	axoneme	22	80	0.0194194	0.223636	Sfur000294(EFHC2);Sfur001156(--);Sfur001301(Dnah1);Sfur001975(ccdc103);Sfur002318(Ift172);Sfur002323(Mak);Sfur002511(--);Sfur004927(ttc25);Sfur006079(Cfap61);Sfur009115(Ift140);Sfur011066(DNAL1);Sfur011133(Traf3ip1);Sfur011750(Gas8);Sfur011786(Wdr11);Sfur011838(Dnajb13);Sfur012390(CFAP206);Sfur013083(Spag6);Sfur013114(cep162);Sfur013303(CFAP20);Sfur013517(ATG16L1);Sfur013612(Dnaaf1);Sfur013943(DN…
GO:0005875	microtubule associated complex	27	103	0.0195651	0.223636	Sfur000565(SNX4);Sfur000619(Dhc64C);Sfur001116(ctp);Sfur001301(Dnah1);Sfur001975(ccdc103);Sfur002283(CG14535);Sfur002511(--);Sfur002967(DNAI2);Sfur003040(Kif23);Sfur003371(APPBP2);Sfur003731(PXN);Sfur004159(DCTN2-p50);Sfur004497(TCTEX1D2);Sfur005048(KIF3A);Sfur005167(KIF20B);Sfur005709(DYNLRB2);Sfur008141(INCENP);Sfur008312(aurkb-a);Sfur008714(Kif18a);Sfur009752(BIRC6);Sfur010146(osm-3);Sfur01045…
GO:0005828	kinetochore microtubule	5	10	0.0198933	0.224546	Sfur000095(polo);Sfur007624(--);Sfur008714(Kif18a);Sfur012861(Cenpe);Sfur013901(--)
GO:0097228	sperm principal piece	4	7	0.0218202	0.243254	Sfur000560(Tekt4);Sfur002318(Ift172);Sfur004446(--);Sfur013083(Spag6)
GO:0030863	cortical cytoskeleton	11	33	0.0225235	0.248033	Sfur000626(Tmod1);Sfur000804(--);Sfur000970(zip);Sfur000982(l(2)gl);Sfur002079(PPP1R9A);Sfur004373(Iqgap1);Sfur007859(scra);Sfur009051(Lancl2);Sfur010114(sqh);Sfur010434(fgt-1);Sfur014357(zip)
GO:0015629	actin cytoskeleton	42	177	0.0248218	0.27005	MSTRG.21722(ck);Sfur000219(FLNA);Sfur000626(Tmod1);Sfur000804(--);Sfur000902(Mlc1);Sfur000970(zip);Sfur000982(l(2)gl);Sfur001371(MYLK);Sfur001439(up);Sfur001563(GAS2L3);Sfur001926(hum-6);Sfur002079(PPP1R9A);Sfur002555(arpc1a-b);Sfur003002(mle);Sfur003658(Smtn);Sfur003710(DDB_G0271356);Sfur003731(PXN);Sfur004159(DCTN2-p50);Sfur004335(MYO3A);Sfur004373(Iqgap1);Sfur005401(myo19);Sfur007457(arpc4);Sf…
GO:0016459	myosin complex	13	42	0.0257228	0.272395	MSTRG.21722(ck);Sfur000804(--);Sfur000902(Mlc1);Sfur000970(zip);Sfur001926(hum-6);Sfur004335(MYO3A);Sfur005401(myo19);Sfur009080(Mlc-c);Sfur010033(fln);Sfur010114(sqh);Sfur013089(--);Sfur014357(zip);Sfur014851(ck)
GO:0070062	extracellular exosome	48	207	0.0258445	0.272395	Sfur000315(Acy1);Sfur000490(--);Sfur000667(PCBP3);Sfur000838(SLC26A11);Sfur001004(atp6v0a1);Sfur001100(--);Sfur001151(PDIA3);Sfur001369(Plaa);Sfur001804(TEKT3);Sfur003765(--);Sfur003819(Cd63);Sfur004229(Eppin);Sfur004459(SGSH);Sfur005445(PRDX4);Sfur005488(PGK1);Sfur006238(NIPBL);Sfur006423(PI4KA);Sfur007189(PCYOX1);Sfur007421(Rreb1);Sfur007449(DPYS);Sfur007535(SLC26A2);Sfur007556(RAB29);Sfur00778…
GO:0065010	extracellular membrane-bounded organelle	49	212	0.0259423	0.272395	Sfur000315(Acy1);Sfur000490(--);Sfur000667(PCBP3);Sfur000838(SLC26A11);Sfur001004(atp6v0a1);Sfur001024(ALPL);Sfur001100(--);Sfur001151(PDIA3);Sfur001369(Plaa);Sfur001804(TEKT3);Sfur003765(--);Sfur003819(Cd63);Sfur004229(Eppin);Sfur004459(SGSH);Sfur005445(PRDX4);Sfur005488(PGK1);Sfur006238(NIPBL);Sfur006423(PI4KA);Sfur007189(PCYOX1);Sfur007421(Rreb1);Sfur007449(DPYS);Sfur007535(SLC26A2);Sfur007556…
GO:0005876	spindle microtubule	12	38	0.0269918	0.277667	Sfur000095(polo);Sfur000269(alphaTub84B);Sfur000345(--);Sfur002272(alphaTub84B);Sfur002696(alphaTub84B);Sfur007624(--);Sfur008714(Kif18a);Sfur009752(BIRC6);Sfur011189(kif4);Sfur011203(Klp61F);Sfur012861(Cenpe);Sfur013901(--)
GO:0009925	basal plasma membrane	11	34	0.0281181	0.277667	Sfur002128(Lar);Sfur004072(Slc7a1);Sfur004104(Slc7a1);Sfur004212(Slc7a1);Sfur004876(ptc);Sfur005596(Ank3);Sfur007797(BMPR2);Sfur008260(Slc7a5);Sfur011914(ABCC1);Sfur012938(Ldlrap1);Sfur013450(ClC-a)
GO:0097014	ciliary plasm	22	83	0.0291683	0.277667	Sfur000294(EFHC2);Sfur001156(--);Sfur001301(Dnah1);Sfur001975(ccdc103);Sfur002318(Ift172);Sfur002323(Mak);Sfur002511(--);Sfur004927(ttc25);Sfur006079(Cfap61);Sfur009115(Ift140);Sfur011066(DNAL1);Sfur011133(Traf3ip1);Sfur011750(Gas8);Sfur011786(Wdr11);Sfur011838(Dnajb13);Sfur012390(CFAP206);Sfur013083(Spag6);Sfur013114(cep162);Sfur013303(CFAP20);Sfur013517(ATG16L1);Sfur013612(Dnaaf1);Sfur013943(DN…
GO:0030663	COPI-coated vesicle membrane	5	11	0.03124	0.277667	Sfur001531(COPB1);Sfur004693(COPE);Sfur006992(TMED2);Sfur011292(TMED2);Sfur014226(gammaCop)
GO:0044291	cell-cell contact zone	5	11	0.03124	0.277667	Sfur000970(zip);Sfur002888(Slc8a1);Sfur005596(Ank3);Sfur012596(RAP2C);Sfur014357(zip)
GO:0000797	condensin core heterodimer	2	2	0.0313643	0.277667	Sfur005178(SMC2);Sfur014246(NCAPD2)
GO:0000942	condensed nuclear chromosome outer kinetochore	2	2	0.0313643	0.277667	Sfur000038(BUB1);Sfur015321(--)
GO:0005784	Sec61 translocon complex	2	2	0.0313643	0.277667	Sfur006380(SEC61A2);Sfur008961(SEC61B)
GO:0009331	glycerol-3-phosphate dehydrogenase complex	2	2	0.0313643	0.277667	Sfur000649(Gpdh);Sfur008914(GPD2)
GO:0017177	glucosidase II complex	2	2	0.0313643	0.277667	Sfur004918(PRKCSH);Sfur009790(Ganab)
GO:0031205	endoplasmic reticulum Sec complex	2	2	0.0313643	0.277667	Sfur005985(Sec63);Sfur008961(SEC61B)
GO:0034998	oligosaccharyltransferase I complex	2	2	0.0313643	0.277667	Sfur010129(TMEM258);Sfur011285(Stt3b)
GO:0035323	male germline ring canal	2	2	0.0313643	0.277667	Sfur007859(scra);Sfur009121(nesd)
GO:0036063	acroblast	2	2	0.0313643	0.277667	Sfur003112(brun);Sfur013935(brun)
GO:0071256	translocon complex	2	2	0.0313643	0.277667	Sfur006380(SEC61A2);Sfur008961(SEC61B)
GO:0097224	sperm connecting piece	2	2	0.0313643	0.277667	Sfur004446(--);Sfur011838(Dnajb13)
GO:0042470	melanosome	12	39	0.0328977	0.288414	Sfur000302(Hsp90b1);Sfur000392(Hsp90b1);Sfur001151(PDIA3);Sfur001250(calub);Sfur002528(Fasn);Sfur003819(Cd63);Sfur004647(PPIB);Sfur007556(RAB29);Sfur007924(RPN1);Sfur009790(Ganab);Sfur012400(GGH);Sfur014350(RPN1)
GO:0016324	apical plasma membrane	43	186	0.0350623	0.304435	Sfur000082(stan);Sfur000490(--);Sfur001004(atp6v0a1);Sfur001025(wat);Sfur001562(KLK13);Sfur001637(--);Sfur001652(alpha-Spec);Sfur002336(ft);Sfur002358(Slc5a12);Sfur002394(Ano4);Sfur002672(Lrp2);Sfur002901(ft);Sfur003094(ft);Sfur003997(Ser);Sfur004072(Slc7a1);Sfur004104(Slc7a1);Sfur004212(Slc7a1);Sfur004483(lft);Sfur004713(PLB1);Sfur005329(PLB1);Sfur005568(PLB1);Sfur005971(--);Sfur006233(ATP7A);Sf…
GO:0000940	condensed chromosome outer kinetochore	4	8	0.0375981	0.307015	Sfur000038(BUB1);Sfur000095(polo);Sfur012861(Cenpe);Sfur015321(--)
GO:0030894	replisome	7	19	0.0378419	0.307015	Sfur000070(pola1);Sfur005462(RpA-70);Sfur008184(DNApol-delta);Sfur008486(DNApol-alpha60);Sfur009691(DNApol-delta);Sfur010285(POLE3);Sfur011216(Pole)
GO:0043601	nuclear replisome	7	19	0.0378419	0.307015	Sfur000070(pola1);Sfur005462(RpA-70);Sfur008184(DNApol-delta);Sfur008486(DNApol-alpha60);Sfur009691(DNApol-delta);Sfur010285(POLE3);Sfur011216(Pole)
GO:0045169	fusome	7	19	0.0378419	0.307015	Sfur000419(Calr);Sfur000619(Dhc64C);Sfur001652(alpha-Spec);Sfur002558(Pdi);Sfur009121(nesd);Sfur011203(Klp61F);Sfur012839(Dhc64C)
GO:0043230	extracellular organelle	49	217	0.0380717	0.307015	Sfur000315(Acy1);Sfur000490(--);Sfur000667(PCBP3);Sfur000838(SLC26A11);Sfur001004(atp6v0a1);Sfur001024(ALPL);Sfur001100(--);Sfur001151(PDIA3);Sfur001369(Plaa);Sfur001804(TEKT3);Sfur003765(--);Sfur003819(Cd63);Sfur004229(Eppin);Sfur004459(SGSH);Sfur005445(PRDX4);Sfur005488(PGK1);Sfur006238(NIPBL);Sfur006423(PI4KA);Sfur007189(PCYOX1);Sfur007421(Rreb1);Sfur007449(DPYS);Sfur007535(SLC26A2);Sfur007556…
GO:1903561	extracellular vesicle	48	213	0.0410295	0.307015	Sfur000315(Acy1);Sfur000490(--);Sfur000667(PCBP3);Sfur000838(SLC26A11);Sfur001004(atp6v0a1);Sfur001100(--);Sfur001151(PDIA3);Sfur001369(Plaa);Sfur001804(TEKT3);Sfur003765(--);Sfur003819(Cd63);Sfur004229(Eppin);Sfur004459(SGSH);Sfur005445(PRDX4);Sfur005488(PGK1);Sfur006238(NIPBL);Sfur006423(PI4KA);Sfur007189(PCYOX1);Sfur007421(Rreb1);Sfur007449(DPYS);Sfur007535(SLC26A2);Sfur007556(RAB29);Sfur00778…
GO:0000164	protein phosphatase type 1 complex	3	5	0.0418194	0.307015	Sfur004029(ppp1cc-a);Sfur004157(ppp1cc-a);Sfur011478(PPP1R3C)
GO:0000778	condensed nuclear chromosome kinetochore	3	5	0.0418194	0.307015	Sfur000038(BUB1);Sfur012861(Cenpe);Sfur015321(--)
GO:0005786	signal recognition particle, endoplasmic reticulum targeting	3	5	0.0418194	0.307015	Sfur000897(Srp19);Sfur009255(ZK512.4);Sfur011421(SRP72)
GO:0031904	endosome lumen	3	5	0.0418194	0.307015	Sfur002672(Lrp2);Sfur003819(Cd63);Sfur013903(--)
GO:0033018	sarcoplasmic reticulum lumen	3	5	0.0418194	0.307015	Sfur000302(Hsp90b1);Sfur000392(Hsp90b1);Sfur001250(calub)
GO:0035324	female germline ring canal	3	5	0.0418194	0.307015	MSTRG.21722(ck);Sfur009121(nesd);Sfur010114(sqh)
GO:0036056	filtration diaphragm	3	5	0.0418194	0.307015	Sfur004373(Iqgap1);Sfur008802(NPHS1);Sfur012055(KIRREL3)
GO:0036057	slit diaphragm	3	5	0.0418194	0.307015	Sfur004373(Iqgap1);Sfur008802(NPHS1);Sfur012055(KIRREL3)
GO:0036513	Derlin-1 retrotranslocation complex	3	5	0.0418194	0.307015	Sfur004484(Hm13);Sfur005057(DERL1);Sfur011425(--)
GO:0042588	zymogen granule	3	5	0.0418194	0.307015	Sfur000193(Pnliprp2);Sfur002850(PNLIP);Sfur006992(TMED2)
GO:0048500	signal recognition particle	3	5	0.0418194	0.307015	Sfur000897(Srp19);Sfur009255(ZK512.4);Sfur011421(SRP72)
GO:0048787	presynaptic active zone membrane	3	5	0.0418194	0.307015	Sfur003329(--);Sfur003666(unc-64);Sfur010346(otof)
GO:1990071	TRAPPII protein complex	3	5	0.0418194	0.307015	Sfur003112(brun);Sfur013935(brun);Sfur014878(Trappc10)
GO:0012507	ER to Golgi transport vesicle membrane	7	20	0.0495875	0.361109	Sfur004863(SEC24C);Sfur006992(TMED2);Sfur009541(GF10347);Sfur010881(--);Sfur011598(Pdcd6);Sfur012403(SEC31A);Sfur014927(SEC16A)
GO:0005793	endoplasmic reticulum-Golgi intermediate compartment	15	55	0.051422	0.371472	Sfur000209(Uggt);Sfur003263(Erp44);Sfur004450(TMED6);Sfur006894(Gnpnat);Sfur006915(Uggt);Sfur006992(TMED2);Sfur007273(LMAN1);Sfur008317(Golga2);Sfur008580(ERGIC2);Sfur009541(GF10347);Sfur010881(--);Sfur011128(Gnpnat);Sfur011292(TMED2);Sfur013903(--);Sfur014715(Mcfd2)
GO:0005929	cilium	68	319	0.0528409	0.378693	MSTRG.21722(ck);Sfur000294(EFHC2);Sfur000345(--);Sfur000363(cfap300);Sfur000560(Tekt4);Sfur000736(--);Sfur000792(CFAP52);Sfur000970(zip);Sfur001156(--);Sfur001170(IFT27);Sfur001301(Dnah1);Sfur001333(tropG);Sfur001591(SLC9C1);Sfur001637(--);Sfur001804(TEKT3);Sfur001975(ccdc103);Sfur002098(--);Sfur002318(Ift172);Sfur002323(Mak);Sfur002511(--);Sfur002967(DNAI2);Sfur003548(SEPTIN4);Sfur003655(Rttn);S…
GO:0045171	intercellular bridge	9	29	0.0575903	0.409481	MSTRG.21722(ck);Sfur002202(Src64B);Sfur002767(Src64B);Sfur002884(NINL);Sfur003040(Kif23);Sfur005167(KIF20B);Sfur007859(scra);Sfur009121(nesd);Sfur010114(sqh)
GO:0030660	Golgi-associated vesicle membrane	7	21	0.0634008	0.443806	Sfur001531(COPB1);Sfur004693(COPE);Sfur006423(PI4KA);Sfur006992(TMED2);Sfur009374(CNGB1);Sfur011292(TMED2);Sfur014226(gammaCop)
GO:0033116	endoplasmic reticulum-Golgi intermediate compartment membrane	7	21	0.0634008	0.443806	Sfur006992(TMED2);Sfur007273(LMAN1);Sfur008317(Golga2);Sfur008580(ERGIC2);Sfur009541(GF10347);Sfur010881(--);Sfur011292(TMED2)
GO:0016460	myosin II complex	5	13	0.0640412	0.44484	Sfur000970(zip);Sfur009080(Mlc-c);Sfur010033(fln);Sfur010114(sqh);Sfur014357(zip)
GO:0005868	cytoplasmic dynein complex	6	17	0.0648816	0.447237	Sfur000565(SNX4);Sfur000619(Dhc64C);Sfur001116(ctp);Sfur004497(TCTEX1D2);Sfur005709(DYNLRB2);Sfur012839(Dhc64C)
GO:0000323	lytic vacuole	62	292	0.0662834	0.453438	MSTRG.3233(SI);Sfur000028(GD10667);Sfur000035(csbC);Sfur000079(RRAGA);Sfur000110(Ppt2);Sfur000111(Arsb);Sfur000424(CG17119);Sfur000770(TMEM165);Sfur000808(PLD3);Sfur000838(SLC26A11);Sfur001004(atp6v0a1);Sfur001643(NAGA);Sfur002072(Ppt1);Sfur002443(znrf2);Sfur003099(grin2b);Sfur003329(--);Sfur003517(--);Sfur003580(MARCHF8);Sfur003657(--);Sfur003664(Pex23);Sfur003666(unc-64);Sfur003819(Cd63);Sfur00…
GO:0005764	lysosome	60	282	0.067606	0.459009	Sfur000028(GD10667);Sfur000035(csbC);Sfur000079(RRAGA);Sfur000110(Ppt2);Sfur000111(Arsb);Sfur000424(CG17119);Sfur000770(TMEM165);Sfur000808(PLD3);Sfur000838(SLC26A11);Sfur001004(atp6v0a1);Sfur001643(NAGA);Sfur002072(Ppt1);Sfur002443(znrf2);Sfur003099(grin2b);Sfur003329(--);Sfur003517(--);Sfur003580(MARCHF8);Sfur003657(--);Sfur003664(Pex23);Sfur003666(unc-64);Sfur003819(Cd63);Sfur004459(SGSH);Sfur…
GO:0071564	npBAF complex	3	6	0.0727715	0.490393	Sfur006908(Bap60);Sfur009576(SS18L1);Sfur011893(SMARCC2)
GO:0098862	cluster of actin-based cell projections	16	63	0.0796331	0.52407	MSTRG.21722(ck);Sfur000821(DCXR);Sfur001004(atp6v0a1);Sfur002672(Lrp2);Sfur003650(DNM1L);Sfur004335(MYO3A);Sfur004713(PLB1);Sfur005568(PLB1);Sfur005992(Cad87A);Sfur006233(ATP7A);Sfur007578(Slc27a4);Sfur008404(WHRN);Sfur010875(Cdc14a);Sfur011683(MFSD10);Sfur013669(Cdh23);Sfur014042(Corin)
GO:0030017	sarcomere	22	92	0.0802722	0.52407	MSTRG.32159(Mylk);MSTRG.32162(unc-89);MSTRG.32164(CCDC141);Sfur000219(FLNA);Sfur000626(Tmod1);Sfur000649(Gpdh);Sfur000970(zip);Sfur001439(up);Sfur002888(Slc8a1);Sfur004035(Mlp84B);Sfur005596(Ank3);Sfur007273(LMAN1);Sfur007915(--);Sfur008329(mbl);Sfur009307(Abra);Sfur010033(fln);Sfur011490(ball);Sfur014357(zip);Sfur014738(--);Sfur015029(Ald1);Sfur015261(aldo-2);Sfur015428(--)
GO:0045177	apical part of cell	53	249	0.0812007	0.52407	Sfur000082(stan);Sfur000490(--);Sfur001004(atp6v0a1);Sfur001025(wat);Sfur001313(Insc);Sfur001562(KLK13);Sfur001637(--);Sfur001652(alpha-Spec);Sfur002336(ft);Sfur002358(Slc5a12);Sfur002394(Ano4);Sfur002672(Lrp2);Sfur002901(ft);Sfur003094(ft);Sfur003469(--);Sfur003997(Ser);Sfur004072(Slc7a1);Sfur004104(Slc7a1);Sfur004212(Slc7a1);Sfur004463(Pdzd2);Sfur004483(lft);Sfur004571(--);Sfur004713(PLB1);Sfur…
GO:0002139	stereocilia coupling link	2	3	0.0829922	0.52407	MSTRG.21722(ck);Sfur008404(WHRN)
GO:0005946	alpha,alpha-trehalose-phosphate synthase complex (UDP-forming)	2	3	0.0829922	0.52407	Sfur002027(TPS1);Sfur011156(tpsA)
GO:0031021	interphase microtubule organizing center	2	3	0.0829922	0.52407	Sfur004421(Mzt1);Sfur009752(BIRC6)
GO:0031362	anchored component of external side of plasma membrane	2	3	0.0829922	0.52407	Sfur000490(--);Sfur008676(Mipp1)
GO:0033186	CAF-1 complex	2	3	0.0829922	0.52407	Sfur006608(Chaf1a);Sfur013976(CHAF1B)
GO:1990316	ATG1/ULK1 kinase complex	2	3	0.0829922	0.52407	Sfur005841(RB1CC1);Sfur008091(RB1CC1)
GO:0097225	sperm midpiece	4	10	0.0840343	0.526965	Sfur000560(Tekt4);Sfur002318(Ift172);Sfur004150(Ptchd3);Sfur004446(--)
GO:0005773	vacuole	74	360	0.0870698	0.542235	MSTRG.21722(ck);MSTRG.3233(SI);Sfur000028(GD10667);Sfur000035(csbC);Sfur000079(RRAGA);Sfur000110(Ppt2);Sfur000111(Arsb);Sfur000424(CG17119);Sfur000770(TMEM165);Sfur000808(PLD3);Sfur000838(SLC26A11);Sfur001004(atp6v0a1);Sfur001363(MTMR2);Sfur001376(--);Sfur001643(NAGA);Sfur002072(Ppt1);Sfur002443(znrf2);Sfur003099(grin2b);Sfur003329(--);Sfur003517(--);Sfur003580(MARCHF8);Sfur003657(--);Sfur003664(…
GO:0044449	contractile fiber part	23	98	0.0889525	0.550165	MSTRG.32159(Mylk);MSTRG.32162(unc-89);MSTRG.32164(CCDC141);Sfur000219(FLNA);Sfur000626(Tmod1);Sfur000649(Gpdh);Sfur000970(zip);Sfur001439(up);Sfur002888(Slc8a1);Sfur004035(Mlp84B);Sfur005596(Ank3);Sfur006939(F42H10.3);Sfur007273(LMAN1);Sfur007915(--);Sfur008329(mbl);Sfur009307(Abra);Sfur010033(fln);Sfur011490(ball);Sfur014357(zip);Sfur014738(--);Sfur015029(Ald1);Sfur015261(aldo-2);Sfur015428(--)
GO:0030286	dynein complex	14	55	0.0953247	0.585566	Sfur000565(SNX4);Sfur000619(Dhc64C);Sfur001116(ctp);Sfur001301(Dnah1);Sfur001975(ccdc103);Sfur002511(--);Sfur002967(DNAI2);Sfur004159(DCTN2-p50);Sfur004497(TCTEX1D2);Sfur005709(DYNLRB2);Sfur010453(Dnah17);Sfur011066(DNAL1);Sfur012839(Dhc64C);Sfur013943(DNALI1)
GO:0030016	myofibril	22	94	0.0968818	0.59111	MSTRG.32159(Mylk);MSTRG.32162(unc-89);MSTRG.32164(CCDC141);Sfur000219(FLNA);Sfur000626(Tmod1);Sfur000649(Gpdh);Sfur000970(zip);Sfur001439(up);Sfur002888(Slc8a1);Sfur004035(Mlp84B);Sfur005596(Ank3);Sfur007273(LMAN1);Sfur007915(--);Sfur008329(mbl);Sfur009307(Abra);Sfur010033(fln);Sfur011490(ball);Sfur014357(zip);Sfur014738(--);Sfur015029(Ald1);Sfur015261(aldo-2);Sfur015428(--)
GO:0043292	contractile fiber	23	100	0.106169	0.642107	MSTRG.32159(Mylk);MSTRG.32162(unc-89);MSTRG.32164(CCDC141);Sfur000219(FLNA);Sfur000626(Tmod1);Sfur000649(Gpdh);Sfur000970(zip);Sfur001439(up);Sfur002888(Slc8a1);Sfur004035(Mlp84B);Sfur005596(Ank3);Sfur006939(F42H10.3);Sfur007273(LMAN1);Sfur007915(--);Sfur008329(mbl);Sfur009307(Abra);Sfur010033(fln);Sfur011490(ball);Sfur014357(zip);Sfur014738(--);Sfur015029(Ald1);Sfur015261(aldo-2);Sfur015428(--)
GO:0030672	synaptic vesicle membrane	14	56	0.107373	0.642107	Sfur000702(Svopl);Sfur002158(dnm1l);Sfur003329(--);Sfur003650(DNM1L);Sfur003666(unc-64);Sfur003756(slc17a8);Sfur004681(Slc17a5);Sfur006059(SLC17A7);Sfur006631(Sv2b);Sfur006696(DMXL1);Sfur007281(Svop);Sfur008211(VAT1L);Sfur010346(otof);Sfur014303(SLC18A2)
GO:0099501	exocytic vesicle membrane	14	56	0.107373	0.642107	Sfur000702(Svopl);Sfur002158(dnm1l);Sfur003329(--);Sfur003650(DNM1L);Sfur003666(unc-64);Sfur003756(slc17a8);Sfur004681(Slc17a5);Sfur006059(SLC17A7);Sfur006631(Sv2b);Sfur006696(DMXL1);Sfur007281(Svop);Sfur008211(VAT1L);Sfur010346(otof);Sfur014303(SLC18A2)
GO:0031674	I band	15	61	0.109663	0.650165	MSTRG.32162(unc-89);MSTRG.32164(CCDC141);Sfur000219(FLNA);Sfur000649(Gpdh);Sfur000970(zip);Sfur002888(Slc8a1);Sfur004035(Mlp84B);Sfur005596(Ank3);Sfur007915(--);Sfur008329(mbl);Sfur011490(ball);Sfur014357(zip);Sfur015029(Ald1);Sfur015261(aldo-2);Sfur015428(--)
GO:0030137	COPI-coated vesicle	5	15	0.110422	0.650165	Sfur001531(COPB1);Sfur004693(COPE);Sfur006992(TMED2);Sfur011292(TMED2);Sfur014226(gammaCop)
GO:0030659	cytoplasmic vesicle membrane	50	239	0.110881	0.650165	MSTRG.38817(Itpr);Sfur000035(csbC);Sfur000193(Pnliprp2);Sfur000322(SLC2A7);Sfur000702(Svopl);Sfur001004(atp6v0a1);Sfur001531(COPB1);Sfur001804(TEKT3);Sfur002158(dnm1l);Sfur002850(PNLIP);Sfur003329(--);Sfur003371(APPBP2);Sfur003517(--);Sfur003580(MARCHF8);Sfur003650(DNM1L);Sfur003666(unc-64);Sfur003756(slc17a8);Sfur003765(--);Sfur004248(AP2M1);Sfur004681(Slc17a5);Sfur004693(COPE);Sfur004863(SEC24C…
GO:0005847	mRNA cleavage and polyadenylation specificity factor complex	4	11	0.114203	0.656847	Sfur001236(Sym);Sfur006256(SYMPK);Sfur009759(Cpsf1);Sfur012743(CSTF2)
GO:0032839	dendrite cytoplasm	4	11	0.114203	0.656847	Sfur001969(GRIK2);Sfur003182(SOD1);Sfur005383(--);Sfur010146(osm-3)
GO:0033179	proton-transporting V-type ATPase, V0 domain	4	11	0.114203	0.656847	Sfur001004(atp6v0a1);Sfur009516(ATP6V0B);Sfur011405(VhaAC39-1);Sfur013642(ATP6V0D1)
GO:0031090	organelle membrane	323	1726	0.120923	0.691096	MSTRG.10604(dnm1l);MSTRG.14537(ELOVL);MSTRG.14666(Stt3a);MSTRG.15727(ACAA2);MSTRG.21722(ck);MSTRG.34003(Hsc70-3);MSTRG.34004(Hsc70-3);MSTRG.36382(SLC25A27);MSTRG.38817(Itpr);MSTRG.7349(Rheb);Sfur000035(csbC);Sfur000047(AAEL008004);Sfur000079(RRAGA);Sfur000100(CYP4C1);Sfur000193(Pnliprp2);Sfur000238(CHERP);Sfur000240(HADHB);Sfur000262(Nnt);Sfur000268(AAEL008004);Sfur000273(AAEL008004);Sfur000286(C…
GO:0016323	basolateral plasma membrane	24	107	0.124922	0.705026	Sfur000490(--);Sfur001652(alpha-Spec);Sfur001806(Slc16a10);Sfur002128(Lar);Sfur002888(Slc8a1);Sfur003212(ine);Sfur004072(Slc7a1);Sfur004104(Slc7a1);Sfur004212(Slc7a1);Sfur004876(ptc);Sfur005382(PKD2);Sfur005596(Ank3);Sfur006233(ATP7A);Sfur006538(Ca9);Sfur007288(LRP1);Sfur007797(BMPR2);Sfur008260(Slc7a5);Sfur008676(Mipp1);Sfur010346(otof);Sfur011914(ABCC1);Sfur012938(Ldlrap1);Sfur013162(mttp);Sfur…
GO:0031012	extracellular matrix	24	107	0.124922	0.705026	MSTRG.36634(IHH);Sfur000334(Mmp10);Sfur000982(l(2)gl);Sfur002746(Hsd17b12);Sfur003875(--);Sfur004229(Eppin);Sfur006039(Ccp84Ab);Sfur006971(Agrn);Sfur007492(--);Sfur008225(Adamts12);Sfur008550(Hspg2);Sfur008762(--);Sfur008892(--);Sfur008908(Tgfbi);Sfur009218(--);Sfur010462(LanB2);Sfur010789(CR1L);Sfur011585(sas);Sfur012521(--);Sfur012780(HPSE);Sfur013084(--);Sfur013442(--);Sfur015067(Toll-7);Sfur0…
GO:0031988	membrane-bounded vesicle	138	713	0.126932	0.710941	MSTRG.15727(ACAA2);MSTRG.21722(ck);MSTRG.32397(Hspa2);MSTRG.34003(Hsc70-3);MSTRG.34004(Hsc70-3);MSTRG.38817(Itpr);MSTRG.7349(Rheb);Sfur000035(csbC);Sfur000193(Pnliprp2);Sfur000302(Hsp90b1);Sfur000315(Acy1);Sfur000322(SLC2A7);Sfur000392(Hsp90b1);Sfur000490(--);Sfur000667(PCBP3);Sfur000702(Svopl);Sfur000821(DCXR);Sfur000838(SLC26A11);Sfur001004(atp6v0a1);Sfur001100(--);Sfur001151(PDIA3);Sfur001250(…
GO:0005903	brush border	10	39	0.138939	0.710941	Sfur000821(DCXR);Sfur001004(atp6v0a1);Sfur002672(Lrp2);Sfur003650(DNM1L);Sfur004713(PLB1);Sfur005568(PLB1);Sfur006233(ATP7A);Sfur007578(Slc27a4);Sfur011683(MFSD10);Sfur014042(Corin)
GO:0005871	kinesin complex	7	25	0.139435	0.710941	Sfur002283(CG14535);Sfur003040(Kif23);Sfur005048(KIF3A);Sfur005167(KIF20B);Sfur008714(Kif18a);Sfur010146(osm-3);Sfur011203(Klp61F)
GO:0000799	nuclear condensin complex	2	4	0.146728	0.710941	Sfur013570(Ncapd3);Sfur014246(NCAPD2)
GO:0005658	alpha DNA polymerase:primase complex	2	4	0.146728	0.710941	Sfur000070(pola1);Sfur008486(DNApol-alpha60)
GO:0005688	U6 snRNP	2	4	0.146728	0.710941	Sfur005516(LSM6);Sfur014004(LSM3)
GO:0016586	RSC complex	2	4	0.146728	0.710941	Sfur006908(Bap60);Sfur014709(brm)
GO:0031233	intrinsic component of external side of plasma membrane	2	4	0.146728	0.710941	Sfur000490(--);Sfur008676(Mipp1)
GO:0097431	mitotic spindle pole	4	12	0.148345	0.710941	Sfur004627(Stag1);Sfur005167(KIF20B);Sfur007057(Wdr62);Sfur011203(Klp61F)
GO:0016023	cytoplasmic, membrane-bounded vesicle	96	491	0.150366	0.710941	MSTRG.21722(ck);MSTRG.32397(Hspa2);MSTRG.34003(Hsc70-3);MSTRG.34004(Hsc70-3);MSTRG.38817(Itpr);Sfur000035(csbC);Sfur000193(Pnliprp2);Sfur000302(Hsp90b1);Sfur000322(SLC2A7);Sfur000392(Hsp90b1);Sfur000702(Svopl);Sfur000821(DCXR);Sfur001004(atp6v0a1);Sfur001151(PDIA3);Sfur001250(calub);Sfur001531(COPB1);Sfur001638(Ttpa);Sfur001804(TEKT3);Sfur001898(Gabbr1);Sfur002072(Ppt1);Sfur002158(dnm1l);Sfur0025…
GO:0005885	Arp2/3 protein complex	3	8	0.155017	0.710941	Sfur002555(arpc1a-b);Sfur007457(arpc4);Sfur008871(arpc5-b)
GO:0030126	COPI vesicle coat	3	8	0.155017	0.710941	Sfur001531(COPB1);Sfur004693(COPE);Sfur014226(gammaCop)
GO:0030127	COPII vesicle coat	3	8	0.155017	0.710941	Sfur004863(SEC24C);Sfur011598(Pdcd6);Sfur012403(SEC31A)
GO:0060091	kinocilium	3	8	0.155017	0.710941	Sfur005992(Cad87A);Sfur010875(Cdc14a);Sfur013669(Cdh23)
GO:0030658	transport vesicle membrane	21	95	0.160269	0.710941	Sfur000702(Svopl);Sfur002158(dnm1l);Sfur003329(--);Sfur003650(DNM1L);Sfur003666(unc-64);Sfur003756(slc17a8);Sfur004681(Slc17a5);Sfur004863(SEC24C);Sfur006059(SLC17A7);Sfur006631(Sv2b);Sfur006696(DMXL1);Sfur006992(TMED2);Sfur007281(Svop);Sfur008211(VAT1L);Sfur009541(GF10347);Sfur010346(otof);Sfur010881(--);Sfur011598(Pdcd6);Sfur012403(SEC31A);Sfur014303(SLC18A2);Sfur014927(SEC16A)
GO:0031526	brush border membrane	7	26	0.163291	0.710941	Sfur001004(atp6v0a1);Sfur002672(Lrp2);Sfur004713(PLB1);Sfur005568(PLB1);Sfur006233(ATP7A);Sfur007578(Slc27a4);Sfur011683(MFSD10)
GO:0005720	nuclear heterochromatin	5	17	0.168883	0.710941	MSTRG.7293(--);Sfur000803(uhrf1);Sfur001142(Esco2);Sfur004856(CBX1);Sfur013570(Ncapd3)
GO:0000792	heterochromatin	8	31	0.169909	0.710941	MSTRG.7293(--);Sfur000803(uhrf1);Sfur001142(Esco2);Sfur001144(Hrb87F);Sfur004856(CBX1);Sfur008806(XNP);Sfur009742(Sall3);Sfur013570(Ncapd3)
GO:0044441	ciliary part	41	200	0.170565	0.710941	Sfur000294(EFHC2);Sfur000560(Tekt4);Sfur000736(--);Sfur001156(--);Sfur001301(Dnah1);Sfur001591(SLC9C1);Sfur001975(ccdc103);Sfur002098(--);Sfur002318(Ift172);Sfur002323(Mak);Sfur002511(--);Sfur003655(Rttn);Sfur004150(Ptchd3);Sfur004446(--);Sfur004927(ttc25);Sfur005382(PKD2);Sfur005971(--);Sfur006079(Cfap61);Sfur008404(WHRN);Sfur009115(Ift140);Sfur009374(CNGB1);Sfur009577(Shank3);Sfur010146(osm-3);…
GO:0033267	axon part	26	122	0.175579	0.710941	MSTRG.32397(Hspa2);Sfur000619(Dhc64C);Sfur001898(Gabbr1);Sfur001969(GRIK2);Sfur002672(Lrp2);Sfur002888(Slc8a1);Sfur003182(SOD1);Sfur003329(--);Sfur003666(unc-64);Sfur003997(Ser);Sfur004764(RANGAP1);Sfur005048(KIF3A);Sfur005188(--);Sfur005596(Ank3);Sfur006724(Pcsk1);Sfur006971(Agrn);Sfur007288(LRP1);Sfur007718(Dagla);Sfur009374(CNGB1);Sfur009965(Itpr);Sfur011189(kif4);Sfur012301(BLVRB);Sfur012489(…
GO:0044433	cytoplasmic vesicle part	55	275	0.17611	0.710941	MSTRG.38817(Itpr);Sfur000035(csbC);Sfur000193(Pnliprp2);Sfur000322(SLC2A7);Sfur000702(Svopl);Sfur001004(atp6v0a1);Sfur001531(COPB1);Sfur001804(TEKT3);Sfur002158(dnm1l);Sfur002850(PNLIP);Sfur003329(--);Sfur003371(APPBP2);Sfur003517(--);Sfur003580(MARCHF8);Sfur003650(DNM1L);Sfur003666(unc-64);Sfur003756(slc17a8);Sfur003765(--);Sfur004248(AP2M1);Sfur004681(Slc17a5);Sfur004693(COPE);Sfur004863(SEC24C…
GO:0001741	XY body	1	1	0.177145	0.710941	Sfur001142(Esco2)
GO:0001939	female pronucleus	1	1	0.177145	0.710941	Sfur013467(Rif1)
GO:0001940	male pronucleus	1	1	0.177145	0.710941	Sfur013467(Rif1)
GO:0002133	polycystin complex	1	1	0.177145	0.710941	Sfur005382(PKD2)
GO:0002140	stereocilia tip link	1	1	0.177145	0.710941	MSTRG.21722(ck)
GO:0005589	collagen type VI trimer	1	1	0.177145	0.710941	Sfur004229(Eppin)
GO:0005846	nuclear cap binding complex	1	1	0.177145	0.710941	Sfur006845(Cbp80)
GO:0005880	nuclear microtubule	1	1	0.177145	0.710941	Sfur010670(awd)
GO:0005883	neurofilament	1	1	0.177145	0.710941	Sfur012938(Ldlrap1)
GO:0005945	6-phosphofructokinase complex	1	1	0.177145	0.710941	Sfur013438(Pfk)
GO:0005971	ribonucleoside-diphosphate reductase complex	1	1	0.177145	0.710941	Sfur005404(Rrm1)
GO:0019034	viral replication complex	1	1	0.177145	0.710941	Sfur006423(PI4KA)
GO:0019185	snRNA-activating protein complex	1	1	0.177145	0.710941	Sfur002619(--)
GO:0020003	symbiont-containing vacuole	1	1	0.177145	0.710941	Sfur007556(RAB29)
GO:0030428	cell septum	1	1	0.177145	0.710941	Sfur008604(chs-2)
GO:0031207	Sec62/Sec63 complex	1	1	0.177145	0.710941	Sfur005985(Sec63)
GO:0031262	Ndc80 complex	1	1	0.177145	0.710941	Sfur015321(--)
GO:0032591	dendritic spine membrane	1	1	0.177145	0.710941	Sfur007718(Dagla)
GO:0034506	chromosome, centromeric core domain	1	1	0.177145	0.710941	Sfur008921(Rcc2)
GO:0035059	RCAF complex	1	1	0.177145	0.710941	Sfur010077(asf1)
GO:0035686	sperm fibrous sheath	1	1	0.177145	0.710941	Sfur001156(--)
GO:0036502	Derlin-1-VIMP complex	1	1	0.177145	0.710941	Sfur005057(DERL1)
GO:0042824	MHC class I peptide loading complex	1	1	0.177145	0.710941	Sfur001151(PDIA3)
GO:0043626	PCNA complex	1	1	0.177145	0.710941	Sfur005880(PCNA)
GO:0044094	host cell nuclear part	1	1	0.177145	0.710941	Sfur006423(PI4KA)
GO:0044220	host cell perinuclear region of cytoplasm	1	1	0.177145	0.710941	Sfur007273(LMAN1)
GO:0044326	dendritic spine neck	1	1	0.177145	0.710941	Sfur002079(PPP1R9A)
GO:0044462	external encapsulating structure part	1	1	0.177145	0.710941	MSTRG.21722(ck)
GO:0044796	DNA polymerase processivity factor complex	1	1	0.177145	0.710941	Sfur005880(PCNA)
GO:0048237	rough endoplasmic reticulum lumen	1	1	0.177145	0.710941	Sfur013903(--)
GO:0060187	cell pole	1	1	0.177145	0.710941	Sfur002558(Pdi)
GO:0070081	clathrin-sculpted monoamine transport vesicle	1	1	0.177145	0.710941	Sfur014303(SLC18A2)
GO:0070083	clathrin-sculpted monoamine transport vesicle membrane	1	1	0.177145	0.710941	Sfur014303(SLC18A2)
GO:0070695	FHF complex	1	1	0.177145	0.710941	Sfur007842(hook)
GO:0070732	spindle envelope	1	1	0.177145	0.710941	Sfur002558(Pdi)
GO:0071920	cleavage body	1	1	0.177145	0.710941	Sfur012743(CSTF2)
GO:0097229	sperm end piece	1	1	0.177145	0.710941	Sfur004446(--)
GO:0097540	axonemal central pair	1	1	0.177145	0.710941	Sfur013303(CFAP20)
GO:0097598	sperm cytoplasmic droplet	1	1	0.177145	0.710941	Sfur002318(Ift172)
GO:0098647	collagen beaded filament	1	1	0.177145	0.710941	Sfur004229(Eppin)
GO:1903144	actomyosin contractile ring actin filament	1	1	0.177145	0.710941	Sfur010114(sqh)
GO:1990427	stereocilia tip-link density	1	1	0.177145	0.710941	MSTRG.21722(ck)
GO:1990723	cytoplasmic periphery of the nuclear pore complex	1	1	0.177145	0.710941	Sfur004764(RANGAP1)
GO:1990761	growth cone lamellipodium	1	1	0.177145	0.710941	Sfur002079(PPP1R9A)
GO:0045178	basal part of cell	11	46	0.179061	0.715453	Sfur002128(Lar);Sfur004072(Slc7a1);Sfur004104(Slc7a1);Sfur004212(Slc7a1);Sfur004876(ptc);Sfur005596(Ank3);Sfur007797(BMPR2);Sfur008260(Slc7a5);Sfur011914(ABCC1);Sfur012938(Ldlrap1);Sfur013450(ClC-a)
GO:0045121	membrane raft	18	82	0.191463	0.744076	Sfur001001(SCARB1);Sfur001898(Gabbr1);Sfur002072(Ppt1);Sfur002394(Ano4);Sfur002672(Lrp2);Sfur003765(--);Sfur004373(Iqgap1);Sfur005488(PGK1);Sfur006233(ATP7A);Sfur006417(UNC5B);Sfur007797(BMPR2);Sfur007895(SCARB2);Sfur008433(CLN3);Sfur008451(CBLB);Sfur008714(Kif18a);Sfur010080(Nae1);Sfur010484(K12H4.7);Sfur012437(SMPD1)
GO:0098857	membrane microdomain	18	82	0.191463	0.744076	Sfur001001(SCARB1);Sfur001898(Gabbr1);Sfur002072(Ppt1);Sfur002394(Ano4);Sfur002672(Lrp2);Sfur003765(--);Sfur004373(Iqgap1);Sfur005488(PGK1);Sfur006233(ATP7A);Sfur006417(UNC5B);Sfur007797(BMPR2);Sfur007895(SCARB2);Sfur008433(CLN3);Sfur008451(CBLB);Sfur008714(Kif18a);Sfur010080(Nae1);Sfur010484(K12H4.7);Sfur012437(SMPD1)
GO:0005884	actin filament	8	32	0.19359	0.744076	Sfur001563(GAS2L3);Sfur003658(Smtn);Sfur004335(MYO3A);Sfur008404(WHRN);Sfur010114(sqh);Sfur013089(--);Sfur014918(Gel);Sfur015324(-)
GO:0032580	Golgi cisterna membrane	8	32	0.19359	0.744076	Sfur001835(FucTA);Sfur006715(CHSY1);Sfur006992(TMED2);Sfur008317(Golga2);Sfur009795(B3GALT6);Sfur011292(TMED2);Sfur012470(uxs1);Sfur014714(FucTA)
GO:0012506	vesicle membrane	50	251	0.197838	0.744076	MSTRG.38817(Itpr);Sfur000035(csbC);Sfur000193(Pnliprp2);Sfur000322(SLC2A7);Sfur000702(Svopl);Sfur001004(atp6v0a1);Sfur001531(COPB1);Sfur001804(TEKT3);Sfur002158(dnm1l);Sfur002850(PNLIP);Sfur003329(--);Sfur003371(APPBP2);Sfur003517(--);Sfur003580(MARCHF8);Sfur003650(DNM1L);Sfur003666(unc-64);Sfur003756(slc17a8);Sfur003765(--);Sfur004248(AP2M1);Sfur004681(Slc17a5);Sfur004693(COPE);Sfur004863(SEC24C…
GO:0005798	Golgi-associated vesicle	10	42	0.198064	0.744076	Sfur001531(COPB1);Sfur003765(--);Sfur004693(COPE);Sfur006233(ATP7A);Sfur006423(PI4KA);Sfur006992(TMED2);Sfur008843(Slh);Sfur009374(CNGB1);Sfur011292(TMED2);Sfur014226(gammaCop)
GO:0032838	cell projection cytoplasm	10	42	0.198064	0.744076	Sfur000619(Dhc64C);Sfur001969(GRIK2);Sfur003182(SOD1);Sfur004764(RANGAP1);Sfur005048(KIF3A);Sfur005188(--);Sfur005383(--);Sfur010146(osm-3);Sfur011189(kif4);Sfur012839(Dhc64C)
GO:0036064	ciliary basal body	20	93	0.201727	0.744076	Sfur000294(EFHC2);Sfur000736(--);Sfur002098(--);Sfur002318(Ift172);Sfur002511(--);Sfur003655(Rttn);Sfur005971(--);Sfur008404(WHRN);Sfur009115(Ift140);Sfur010146(osm-3);Sfur010527(gas8);Sfur010875(Cdc14a);Sfur011133(Traf3ip1);Sfur011326(cfap157);Sfur011750(Gas8);Sfur011786(Wdr11);Sfur012390(CFAP206);Sfur012776(ttll6);Sfur013303(CFAP20);Sfur014379(Cep78)
GO:0005801	cis-Golgi network	5	18	0.201807	0.744076	Sfur001043(KdelR);Sfur007556(RAB29);Sfur008317(Golga2);Sfur008843(Slh);Sfur013903(--)
GO:0005849	mRNA cleavage factor complex	5	18	0.201807	0.744076	Sfur001236(Sym);Sfur006256(SYMPK);Sfur009759(Cpsf1);Sfur012743(CSTF2);Sfur013708(CSTF1)
GO:0010369	chromocenter	3	9	0.203337	0.744076	Sfur001142(Esco2);Sfur008806(XNP);Sfur009742(Sall3)
GO:0033643	host cell part	3	9	0.203337	0.744076	Sfur006423(PI4KA);Sfur007273(LMAN1);Sfur007556(RAB29)
GO:0033646	host intracellular part	3	9	0.203337	0.744076	Sfur006423(PI4KA);Sfur007273(LMAN1);Sfur007556(RAB29)
GO:0034045	pre-autophagosomal structure membrane	3	9	0.203337	0.744076	Sfur005841(RB1CC1);Sfur008091(RB1CC1);Sfur013517(ATG16L1)
GO:0036019	endolysosome	3	9	0.203337	0.744076	Sfur008572(path);Sfur010066(path);Sfur010342(path)
GO:0036157	outer dynein arm	3	9	0.203337	0.744076	Sfur001975(ccdc103);Sfur002511(--);Sfur011066(DNAL1)
GO:0043656	intracellular region of host	3	9	0.203337	0.744076	Sfur006423(PI4KA);Sfur007273(LMAN1);Sfur007556(RAB29)
GO:0009986	cell surface	45	225	0.204173	0.744076	Sfur000111(Arsb);Sfur000224(NLGN4Y);Sfur000490(--);Sfur000804(--);Sfur000970(zip);Sfur001001(SCARB1);Sfur001151(PDIA3);Sfur001371(MYLK);Sfur001562(KLK13);Sfur002128(Lar);Sfur002197(ABCG1);Sfur002394(Ano4);Sfur002672(Lrp2);Sfur002977(Abcg1);Sfur003263(Erp44);Sfur003765(--);Sfur003819(Cd63);Sfur003997(Ser);Sfur004029(ppp1cc-a);Sfur004157(ppp1cc-a);Sfur004484(Hm13);Sfur005461(Ldlr);Sfur005596(Ank3);…
GO:0098687	chromosomal region	42	209	0.204181	0.744076	MSTRG.36572(smc1a);MSTRG.7293(--);Sfur000038(BUB1);Sfur000095(polo);Sfur000619(Dhc64C);Sfur001100(--);Sfur001142(Esco2);Sfur001144(Hrb87F);Sfur003077(DCLRE1A);Sfur003408(Mad2l1);Sfur003759(Ssrp);Sfur004029(ppp1cc-a);Sfur004157(ppp1cc-a);Sfur004764(RANGAP1);Sfur004856(CBX1);Sfur005835(mit(1)15);Sfur007624(--);Sfur008141(INCENP);Sfur008312(aurkb-a);Sfur008569(SPO11);Sfur008639(dscc1);Sfur008714(Kif…
GO:0031410	cytoplasmic vesicle	107	561	0.2071	0.744076	MSTRG.21722(ck);MSTRG.29743(nas-13);MSTRG.32397(Hspa2);MSTRG.34003(Hsc70-3);MSTRG.34004(Hsc70-3);MSTRG.38817(Itpr);Sfur000035(csbC);Sfur000193(Pnliprp2);Sfur000302(Hsp90b1);Sfur000322(SLC2A7);Sfur000392(Hsp90b1);Sfur000702(Svopl);Sfur000821(DCXR);Sfur001004(atp6v0a1);Sfur001151(PDIA3);Sfur001250(calub);Sfur001531(COPB1);Sfur001638(Ttpa);Sfur001804(TEKT3);Sfur001898(Gabbr1);Sfur002072(Ppt1);Sfur00…
GO:0001669	acrosomal vesicle	6	23	0.210764	0.744076	Sfur000821(DCXR);Sfur001804(TEKT3);Sfur004371(Tssk4);Sfur006631(Sv2b);Sfur013979(TSSK2);Sfur014686(Atp6v1e2)
GO:0016327	apicolateral plasma membrane	6	23	0.210764	0.744076	Sfur000982(l(2)gl);Sfur002336(ft);Sfur002901(ft);Sfur003094(ft);Sfur003469(--);Sfur006377(Dlish)
GO:0030662	coated vesicle membrane	14	63	0.215001	0.744076	Sfur000035(csbC);Sfur001531(COPB1);Sfur004248(AP2M1);Sfur004693(COPE);Sfur004863(SEC24C);Sfur006992(TMED2);Sfur009541(GF10347);Sfur010881(--);Sfur011292(TMED2);Sfur011598(Pdcd6);Sfur012403(SEC31A);Sfur014226(gammaCop);Sfur014303(SLC18A2);Sfur014927(SEC16A)
GO:1904115	axon cytoplasm	7	28	0.215833	0.744076	Sfur000619(Dhc64C);Sfur003182(SOD1);Sfur004764(RANGAP1);Sfur005048(KIF3A);Sfur005188(--);Sfur011189(kif4);Sfur012839(Dhc64C)
GO:0000808	origin recognition complex	2	5	0.216667	0.744076	Sfur008514(Orc1);Sfur015375(Orc3)
GO:0005664	nuclear origin of replication recognition complex	2	5	0.216667	0.744076	Sfur008514(Orc1);Sfur015375(Orc3)
GO:0005879	axonemal microtubule	2	5	0.216667	0.744076	Sfur013114(cep162);Sfur013303(CFAP20)
GO:0005952	cAMP-dependent protein kinase complex	2	5	0.216667	0.744076	Sfur001156(--);Sfur009613(Pka-C3)
GO:0005967	mitochondrial pyruvate dehydrogenase complex	2	5	0.216667	0.744076	Sfur000898(T05H10.6);Sfur013548(PDHB)
GO:0008278	cohesin complex	2	5	0.216667	0.744076	MSTRG.36572(smc1a);Sfur004627(Stag1)
GO:0008622	epsilon DNA polymerase complex	2	5	0.216667	0.744076	Sfur010285(POLE3);Sfur011216(Pole)
GO:0031105	septin complex	2	5	0.216667	0.744076	Sfur003548(SEPTIN4);Sfur009889(Sep2)
GO:0032156	septin cytoskeleton	2	5	0.216667	0.744076	Sfur003548(SEPTIN4);Sfur009889(Sep2)
GO:0032593	insulin-responsive compartment	2	5	0.216667	0.744076	Sfur003765(--);Sfur007288(LRP1)
GO:0043625	delta DNA polymerase complex	2	5	0.216667	0.744076	Sfur008184(DNApol-delta);Sfur009691(DNApol-delta)
GO:0097149	centralspindlin complex	2	5	0.216667	0.744076	Sfur003040(Kif23);Sfur009121(nesd)
GO:0044437	vacuolar part	44	221	0.216713	0.744076	MSTRG.21722(ck);Sfur000035(csbC);Sfur000079(RRAGA);Sfur000424(CG17119);Sfur000770(TMEM165);Sfur000808(PLD3);Sfur000838(SLC26A11);Sfur001004(atp6v0a1);Sfur001363(MTMR2);Sfur001376(--);Sfur002443(znrf2);Sfur003329(--);Sfur003517(--);Sfur003657(--);Sfur003664(Pex23);Sfur003666(unc-64);Sfur003819(Cd63);Sfur004459(SGSH);Sfur004681(Slc17a5);Sfur004759(MFSD12);Sfur005197(Hgsnat);Sfur007288(LRP1);Sfur008…
GO:0031982	vesicle	152	810	0.218935	0.748857	MSTRG.15727(ACAA2);MSTRG.21722(ck);MSTRG.29743(nas-13);MSTRG.32397(Hspa2);MSTRG.34003(Hsc70-3);MSTRG.34004(Hsc70-3);MSTRG.38817(Itpr);MSTRG.7349(Rheb);Sfur000035(csbC);Sfur000193(Pnliprp2);Sfur000302(Hsp90b1);Sfur000315(Acy1);Sfur000322(SLC2A7);Sfur000392(Hsp90b1);Sfur000490(--);Sfur000667(PCBP3);Sfur000702(Svopl);Sfur000821(DCXR);Sfur000838(SLC26A11);Sfur001004(atp6v0a1);Sfur001100(--);Sfur00115…
GO:0098858	actin-based cell projection	21	100	0.227689	0.775862	MSTRG.21722(ck);MSTRG.22592(RAPH1);Sfur000490(--);Sfur000821(DCXR);Sfur001926(hum-6);Sfur002079(PPP1R9A);Sfur004335(MYO3A);Sfur005332(Nrg);Sfur005992(Cad87A);Sfur006233(ATP7A);Sfur006538(Ca9);Sfur007535(SLC26A2);Sfur007578(Slc27a4);Sfur008260(Slc7a5);Sfur008404(WHRN);Sfur008676(Mipp1);Sfur008930(Cbr3);Sfur010875(Cdc14a);Sfur012122(stac);Sfur013669(Cdh23);Sfur013943(DNALI1)
GO:0005911	cell-cell junction	34	169	0.231319	0.785266	MSTRG.17552(C5);MSTRG.2266(--);Sfur000082(stan);Sfur000970(zip);Sfur000982(l(2)gl);Sfur001236(Sym);Sfur001562(KLK13);Sfur002456(ccdc85c);Sfur002888(Slc8a1);Sfur003731(PXN);Sfur004373(Iqgap1);Sfur004463(Pdzd2);Sfur004483(lft);Sfur004571(--);Sfur004921(--);Sfur005332(Nrg);Sfur005596(Ank3);Sfur005803(Pdzd2);Sfur005992(Cad87A);Sfur006167(--);Sfur006256(SYMPK);Sfur006776(ASH1L);Sfur007483(--);Sfur0075…
GO:0033176	proton-transporting V-type ATPase complex	5	19	0.236647	0.800346	Sfur001004(atp6v0a1);Sfur001376(--);Sfur009516(ATP6V0B);Sfur011405(VhaAC39-1);Sfur013642(ATP6V0D1)
GO:0070160	occluding junction	17	80	0.241549	0.811972	MSTRG.17552(C5);MSTRG.2266(--);Sfur000982(l(2)gl);Sfur001236(Sym);Sfur002456(ccdc85c);Sfur004571(--);Sfur004921(--);Sfur005332(Nrg);Sfur006256(SYMPK);Sfur006776(ASH1L);Sfur007483(--);Sfur007575(Cont);Sfur008028(TBCD);Sfur010240(Wnk3);Sfur010439(Shroom2);Sfur011648(Lac);Sfur012596(RAP2C)
GO:0001917	photoreceptor inner segment	6	24	0.241883	0.811972	Sfur002323(Mak);Sfur005992(Cad87A);Sfur008404(WHRN);Sfur010434(fgt-1);Sfur012792(ZBED6);Sfur013669(Cdh23)
GO:0030120	vesicle coat	7	29	0.244132	0.815046	Sfur001531(COPB1);Sfur004248(AP2M1);Sfur004693(COPE);Sfur004863(SEC24C);Sfur011598(Pdcd6);Sfur012403(SEC31A);Sfur014226(gammaCop)
GO:0031672	A band	8	34	0.244604	0.815046	Sfur000649(Gpdh);Sfur007915(--);Sfur008329(mbl);Sfur010033(fln);Sfur011490(ball);Sfur015029(Ald1);Sfur015261(aldo-2);Sfur015428(--)
GO:0000780	condensed nuclear chromosome, centromeric region	3	10	0.254466	0.832547	Sfur000038(BUB1);Sfur012861(Cenpe);Sfur015321(--)
GO:0017101	aminoacyl-tRNA synthetase multienzyme complex	3	10	0.254466	0.832547	Sfur011788(GluProRS);Sfur013112(GlnRS);Sfur013349(GlnRS)
GO:0030008	TRAPP complex	3	10	0.254466	0.832547	Sfur003112(brun);Sfur013935(brun);Sfur014878(Trappc10)
GO:0030867	rough endoplasmic reticulum membrane	3	10	0.254466	0.832547	Sfur005985(Sec63);Sfur006380(SEC61A2);Sfur008961(SEC61B)
GO:0032992	protein-carbohydrate complex	3	10	0.254466	0.832547	Sfur003875(--);Sfur008762(--);Sfur008892(--)
GO:0044450	microtubule organizing center part	20	97	0.262171	0.845221	Sfur000095(polo);Sfur000736(--);Sfur000977(Wdr13);Sfur001116(ctp);Sfur001320(cep135);Sfur001637(--);Sfur002098(--);Sfur003655(Rttn);Sfur004421(Mzt1);Sfur005101(CDK5RAP2);Sfur008880(neurl4);Sfur009115(Ift140);Sfur009496(SAK);Sfur009752(BIRC6);Sfur010920(--);Sfur012709(DLGAP1);Sfur013114(cep162);Sfur013979(TSSK2);Sfur013995(--);Sfur014379(Cep78)
GO:0030133	transport vesicle	37	188	0.264588	0.845221	Sfur000035(csbC);Sfur000322(SLC2A7);Sfur000702(Svopl);Sfur001898(Gabbr1);Sfur002072(Ppt1);Sfur002158(dnm1l);Sfur003329(--);Sfur003650(DNM1L);Sfur003666(unc-64);Sfur003756(slc17a8);Sfur003765(--);Sfur004450(TMED6);Sfur004681(Slc17a5);Sfur004863(SEC24C);Sfur006059(SLC17A7);Sfur006233(ATP7A);Sfur006631(Sv2b);Sfur006696(DMXL1);Sfur006724(Pcsk1);Sfur006992(TMED2);Sfur007273(LMAN1);Sfur007281(Svop);Sfu…
GO:0000421	autophagosome membrane	4	15	0.267896	0.845221	Sfur003664(Pex23);Sfur009189(ATG9A);Sfur010881(--);Sfur013517(ATG16L1)
GO:0070971	endoplasmic reticulum exit site	4	15	0.267896	0.845221	Sfur004863(SEC24C);Sfur011598(Pdcd6);Sfur012403(SEC31A);Sfur014927(SEC16A)
GO:0032420	stereocilium	5	20	0.272968	0.845221	Sfur004335(MYO3A);Sfur005992(Cad87A);Sfur008404(WHRN);Sfur010875(Cdc14a);Sfur013669(Cdh23)
GO:0043202	lysosomal lumen	5	20	0.272968	0.845221	Sfur000808(PLD3);Sfur003517(--);Sfur004459(SGSH);Sfur010398(NAGLU);Sfur010406(SERPINB13)
GO:0035861	site of double-strand break	7	30	0.2735	0.845221	Sfur001142(Esco2);Sfur001206(Timeless);Sfur002555(arpc1a-b);Sfur007457(arpc4);Sfur008871(arpc5-b);Sfur013467(Rif1);Sfur013892(rad50)
GO:0032421	stereocilium bundle	6	25	0.274235	0.845221	MSTRG.21722(ck);Sfur004335(MYO3A);Sfur005992(Cad87A);Sfur008404(WHRN);Sfur010875(Cdc14a);Sfur013669(Cdh23)
GO:0030018	Z disc	12	56	0.28089	0.845221	Sfur000219(FLNA);Sfur000649(Gpdh);Sfur000970(zip);Sfur002888(Slc8a1);Sfur004035(Mlp84B);Sfur005596(Ank3);Sfur007915(--);Sfur008329(mbl);Sfur011490(ball);Sfur014357(zip);Sfur015029(Ald1);Sfur015261(aldo-2)
GO:0005815	microtubule organizing center	69	364	0.283496	0.845221	MSTRG.14617(RANBP1);Sfur000095(polo);Sfur000109(ddx11);Sfur000269(alphaTub84B);Sfur000294(EFHC2);Sfur000345(--);Sfur000547(--);Sfur000736(--);Sfur000977(Wdr13);Sfur001116(ctp);Sfur001320(cep135);Sfur001637(--);Sfur002098(--);Sfur002272(alphaTub84B);Sfur002318(Ift172);Sfur002323(Mak);Sfur002344(l(2)dtl);Sfur002511(--);Sfur002696(alphaTub84B);Sfur002884(NINL);Sfur003002(mle);Sfur003040(Kif23);Sfur0…
GO:0005663	DNA replication factor C complex	2	6	0.288615	0.845221	Sfur003256(Rfc5);Sfur013525(chtf18)
GO:0005920	smooth septate junction	2	6	0.288615	0.845221	Sfur000982(l(2)gl);Sfur007483(--)
GO:0014704	intercalated disc	2	6	0.288615	0.845221	Sfur002888(Slc8a1);Sfur005596(Ank3)
GO:0019773	proteasome core complex, alpha-subunit complex	2	6	0.288615	0.845221	Sfur003933(PSMA6);Sfur009256(PSMA7)
GO:0031298	replication fork protection complex	2	6	0.288615	0.845221	Sfur001206(Timeless);Sfur009804(wdhd1)
GO:0031618	nuclear pericentric heterochromatin	2	6	0.288615	0.845221	Sfur001142(Esco2);Sfur013570(Ncapd3)
GO:0033181	plasma membrane proton-transporting V-type ATPase complex	2	6	0.288615	0.845221	Sfur001376(--);Sfur013642(ATP6V0D1)
GO:0033655	host cell cytoplasm part	2	6	0.288615	0.845221	Sfur007273(LMAN1);Sfur007556(RAB29)
GO:0042765	GPI-anchor transamidase complex	2	6	0.288615	0.845221	Sfur005629(Pigu);Sfur008723(PIGT)
GO:0045252	oxoglutarate dehydrogenase complex	2	6	0.288615	0.845221	Sfur014793(OGDH);Sfur015330(ogdh-1)
GO:0045254	pyruvate dehydrogenase complex	2	6	0.288615	0.845221	Sfur000898(T05H10.6);Sfur013548(PDHB)
GO:0097165	nuclear stress granule	2	6	0.288615	0.845221	Sfur003002(mle);Sfur006256(SYMPK)
GO:0098576	lumenal side of membrane	2	6	0.288615	0.845221	Sfur004484(Hm13);Sfur006093(HSD11B2)
GO:0005811	lipid particle	10	46	0.290216	0.845221	Sfur001415(Pnpla2);Sfur003266(Akap1);Sfur003700(Hsd17b11);Sfur004885(HSD17B13);Sfur005835(mit(1)15);Sfur008501(SCCPDH);Sfur013239(FAAH2);Sfur013334(FAAH2);Sfur013917(--);Sfur014855(Stard13)
GO:0032154	cleavage furrow	9	41	0.294866	0.845221	Sfur000804(--);Sfur000970(zip);Sfur001371(MYLK);Sfur004029(ppp1cc-a);Sfur004157(ppp1cc-a);Sfur007859(scra);Sfur010114(sqh);Sfur014357(zip);Sfur015102(Hmcn1)
GO:0097610	cell surface furrow	9	41	0.294866	0.845221	Sfur000804(--);Sfur000970(zip);Sfur001371(MYLK);Sfur004029(ppp1cc-a);Sfur004157(ppp1cc-a);Sfur007859(scra);Sfur010114(sqh);Sfur014357(zip);Sfur015102(Hmcn1)
GO:0005774	vacuolar membrane	39	202	0.301398	0.845221	MSTRG.21722(ck);Sfur000035(csbC);Sfur000079(RRAGA);Sfur000424(CG17119);Sfur000770(TMEM165);Sfur000838(SLC26A11);Sfur001004(atp6v0a1);Sfur001363(MTMR2);Sfur001376(--);Sfur002443(znrf2);Sfur003329(--);Sfur003517(--);Sfur003657(--);Sfur003664(Pex23);Sfur003666(unc-64);Sfur003819(Cd63);Sfur004681(Slc17a5);Sfur004759(MFSD12);Sfur005197(Hgsnat);Sfur007288(LRP1);Sfur008260(Slc7a5);Sfur008433(CLN3);Sfur0…
GO:0005751	mitochondrial respiratory chain complex IV	3	11	0.307065	0.845221	Sfur005773(COX5A);Sfur013176(Cox6a1);Sfur014287(COX4I2)
GO:0016471	vacuolar proton-transporting V-type ATPase complex	3	11	0.307065	0.845221	Sfur001004(atp6v0a1);Sfur001376(--);Sfur013642(ATP6V0D1)
GO:0005775	vacuolar lumen	6	26	0.307518	0.845221	Sfur000808(PLD3);Sfur003517(--);Sfur004459(SGSH);Sfur010398(NAGLU);Sfur010406(SERPINB13);Sfur012400(GGH)
GO:0042575	DNA polymerase complex	4	16	0.311096	0.845221	Sfur008184(DNApol-delta);Sfur009691(DNApol-delta);Sfur010285(POLE3);Sfur011216(Pole)
GO:0005813	centrosome	48	253	0.322265	0.845221	Sfur000095(polo);Sfur000269(alphaTub84B);Sfur000736(--);Sfur000977(Wdr13);Sfur001116(ctp);Sfur001320(cep135);Sfur001637(--);Sfur002098(--);Sfur002272(alphaTub84B);Sfur002323(Mak);Sfur002344(l(2)dtl);Sfur002696(alphaTub84B);Sfur002884(NINL);Sfur003002(mle);Sfur003040(Kif23);Sfur003135(--);Sfur003374(--);Sfur003655(Rttn);Sfur004421(Mzt1);Sfur005101(CDK5RAP2);Sfur005167(KIF20B);Sfur005415(CycE);Sfur…
GO:0000308	cytoplasmic cyclin-dependent protein kinase holoenzyme complex	1	2	0.322925	0.845221	Sfur001932(cdk14)
GO:0000324	fungal-type vacuole	1	2	0.322925	0.845221	Sfur011075(--)
GO:0000329	fungal-type vacuole membrane	1	2	0.322925	0.845221	Sfur011075(--)
GO:0002141	stereocilia ankle link	1	2	0.322925	0.845221	Sfur008404(WHRN)
GO:0002142	stereocilia ankle link complex	1	2	0.322925	0.845221	Sfur008404(WHRN)
GO:0005656	nuclear pre-replicative complex	1	2	0.322925	0.845221	Sfur015375(Orc3)
GO:0005674	transcription factor TFIIF complex	1	2	0.322925	0.845221	Sfur010293(TfIIFalpha)
GO:0005848	mRNA cleavage stimulating factor complex	1	2	0.322925	0.845221	Sfur013708(CSTF1)
GO:0005861	troponin complex	1	2	0.322925	0.845221	Sfur001439(up)
GO:0014731	spectrin-associated cytoskeleton	1	2	0.322925	0.845221	Sfur005596(Ank3)
GO:0019030	icosahedral viral capsid	1	2	0.322925	0.845221	Sfur011543(--)
GO:0030868	smooth endoplasmic reticulum membrane	1	2	0.322925	0.845221	Sfur010881(--)
GO:0031083	BLOC-1 complex	1	2	0.322925	0.845221	Sfur005188(--)
GO:0031475	myosin V complex	1	2	0.322925	0.845221	Sfur009080(Mlc-c)
GO:0031476	myosin VI complex	1	2	0.322925	0.845221	Sfur009080(Mlc-c)
GO:0031477	myosin VII complex	1	2	0.322925	0.845221	Sfur009080(Mlc-c)
GO:0031515	tRNA (m1A) methyltransferase complex	1	2	0.322925	0.845221	Sfur003211(Trmt61a)
GO:0031673	H zone	1	2	0.322925	0.845221	Sfur008329(mbl)
GO:0033268	node of Ranvier	1	2	0.322925	0.845221	Sfur005596(Ank3)
GO:0033391	chromatoid body	1	2	0.322925	0.845221	Sfur010797(Arntl)
GO:0034361	very-low-density lipoprotein particle	1	2	0.322925	0.845221	Sfur007189(PCYOX1)
GO:0034385	triglyceride-rich lipoprotein particle	1	2	0.322925	0.845221	Sfur007189(PCYOX1)
GO:0035101	FACT complex	1	2	0.322925	0.845221	Sfur003759(Ssrp)
GO:0035363	histone locus body	1	2	0.322925	0.845221	Sfur001236(Sym)
GO:0039615	T=1 icosahedral viral capsid	1	2	0.322925	0.845221	Sfur011543(--)
GO:0042600	chorion	1	2	0.322925	0.845221	Sfur000653(Pxd)
GO:0060198	clathrin-sculpted vesicle	1	2	0.322925	0.845221	Sfur014303(SLC18A2)
GO:0061673	mitotic spindle astral microtubule	1	2	0.322925	0.845221	Sfur008714(Kif18a)
GO:0071458	integral component of cytoplasmic side of endoplasmic reticulum membrane	1	2	0.322925	0.845221	Sfur004484(Hm13)
GO:0097487	multivesicular body, internal vesicle	1	2	0.322925	0.845221	Sfur003819(Cd63)
GO:0097545	axonemal outer doublet	1	2	0.322925	0.845221	Sfur013303(CFAP20)
GO:1990357	terminal web	1	2	0.322925	0.845221	Sfur000626(Tmod1)
GO:1990423	RZZ complex	1	2	0.322925	0.845221	Sfur007624(--)
GO:1990498	mitotic spindle microtubule	1	2	0.322925	0.845221	Sfur011203(Klp61F)
GO:1990513	CLOCK-BMAL transcription complex	1	2	0.322925	0.845221	Sfur002772(Clk)
GO:1990604	IRE1-TRAF2-ASK1 complex	1	2	0.322925	0.845221	Sfur003703(At1g06840)
GO:1990696	USH2 complex	1	2	0.322925	0.845221	Sfur008404(WHRN)
GO:0030135	coated vesicle	25	128	0.328035	0.856115	Sfur000035(csbC);Sfur001531(COPB1);Sfur001638(Ttpa);Sfur003765(--);Sfur004248(AP2M1);Sfur004450(TMED6);Sfur004693(COPE);Sfur004863(SEC24C);Sfur006233(ATP7A);Sfur006992(TMED2);Sfur007273(LMAN1);Sfur007288(LRP1);Sfur008317(Golga2);Sfur008580(ERGIC2);Sfur008831(CLVS1);Sfur009204(--);Sfur009541(GF10347);Sfur010615(Scyl2);Sfur010881(--);Sfur011292(TMED2);Sfur011598(Pdcd6);Sfur012403(SEC31A);Sfur014226…
GO:0044448	cell cortex part	18	91	0.342602	0.891285	MSTRG.21722(ck);Sfur000626(Tmod1);Sfur000804(--);Sfur000970(zip);Sfur000982(l(2)gl);Sfur001313(Insc);Sfur002079(PPP1R9A);Sfur003469(--);Sfur003548(SEPTIN4);Sfur003997(Ser);Sfur004373(Iqgap1);Sfur006377(Dlish);Sfur007859(scra);Sfur009051(Lancl2);Sfur009889(Sep2);Sfur010114(sqh);Sfur010434(fgt-1);Sfur014357(zip)
GO:0099503	secretory vesicle	40	211	0.343485	0.891285	MSTRG.38817(Itpr);Sfur000035(csbC);Sfur000193(Pnliprp2);Sfur000322(SLC2A7);Sfur000702(Svopl);Sfur000821(DCXR);Sfur001804(TEKT3);Sfur001898(Gabbr1);Sfur002072(Ppt1);Sfur002158(dnm1l);Sfur002850(PNLIP);Sfur003329(--);Sfur003650(DNM1L);Sfur003666(unc-64);Sfur003756(slc17a8);Sfur003765(--);Sfur004371(Tssk4);Sfur004681(Slc17a5);Sfur005445(PRDX4);Sfur005534(--);Sfur006059(SLC17A7);Sfur006233(ATP7A);Sfu…
GO:0030175	filopodium	9	43	0.348108	0.900692	MSTRG.22592(RAPH1);Sfur000490(--);Sfur001926(hum-6);Sfur002079(PPP1R9A);Sfur004335(MYO3A);Sfur005332(Nrg);Sfur008676(Mipp1);Sfur012122(stac);Sfur013943(DNALI1)
GO:0005845	mRNA cap binding complex	2	7	0.359667	0.905444	Sfur006845(Cbp80);Sfur009741(Rnmt)
GO:0005882	intermediate filament	2	7	0.359667	0.905444	MSTRG.36688(UPP2);Sfur012938(Ldlrap1)
GO:0031390	Ctf18 RFC-like complex	2	7	0.359667	0.905444	Sfur003256(Rfc5);Sfur008639(dscc1)
GO:0034358	plasma lipoprotein particle	2	7	0.359667	0.905444	Sfur005461(Ldlr);Sfur007189(PCYOX1)
GO:0036396	MIS complex	2	7	0.359667	0.905444	Sfur005812(nito);Sfur008416(Flacc)
GO:0044214	spanning component of plasma membrane	2	7	0.359667	0.905444	Sfur007797(BMPR2);Sfur009383(flower)
GO:0045240	dihydrolipoyl dehydrogenase complex	2	7	0.359667	0.905444	Sfur014793(OGDH);Sfur015330(ogdh-1)
GO:0045293	mRNA editing complex	2	7	0.359667	0.905444	Sfur005812(nito);Sfur008416(Flacc)
GO:1990777	lipoprotein particle	2	7	0.359667	0.905444	Sfur005461(Ldlr);Sfur007189(PCYOX1)
GO:0045277	respiratory chain complex IV	3	12	0.359972	0.905444	Sfur005773(COX5A);Sfur013176(Cox6a1);Sfur014287(COX4I2)
GO:0030141	secretory granule	20	103	0.363287	0.911246	MSTRG.38817(Itpr);Sfur000193(Pnliprp2);Sfur000821(DCXR);Sfur001804(TEKT3);Sfur002850(PNLIP);Sfur003765(--);Sfur004371(Tssk4);Sfur005445(PRDX4);Sfur005534(--);Sfur006233(ATP7A);Sfur006631(Sv2b);Sfur006724(Pcsk1);Sfur006992(TMED2);Sfur007288(LRP1);Sfur008501(SCCPDH);Sfur009965(Itpr);Sfur012400(GGH);Sfur013979(TSSK2);Sfur014316(CG5235);Sfur014686(Atp6v1e2)
GO:0030667	secretory granule membrane	7	33	0.365781	0.912433	MSTRG.38817(Itpr);Sfur000193(Pnliprp2);Sfur001804(TEKT3);Sfur002850(PNLIP);Sfur006992(TMED2);Sfur009965(Itpr);Sfur014316(CG5235)
GO:0034451	centriolar satellite	7	33	0.365781	0.912433	Sfur000736(--);Sfur000977(Wdr13);Sfur001637(--);Sfur002098(--);Sfur010920(--);Sfur012709(DLGAP1);Sfur013995(--)
GO:0000922	spindle pole	16	82	0.37787	0.934418	Sfur000095(polo);Sfur000109(ddx11);Sfur003408(Mad2l1);Sfur004627(Stag1);Sfur005101(CDK5RAP2);Sfur005167(KIF20B);Sfur007057(Wdr62);Sfur007624(--);Sfur008317(Golga2);Sfur009486(CDC6);Sfur010875(Cdc14a);Sfur011203(Klp61F);Sfur011472(-);Sfur012709(DLGAP1);Sfur014869(KATNAL1);Sfur015091(KATNAL1)
GO:0031430	M band	5	23	0.386532	0.934418	Sfur000649(Gpdh);Sfur007915(--);Sfur011490(ball);Sfur015029(Ald1);Sfur015261(aldo-2)
GO:0032432	actin filament bundle	5	23	0.386532	0.934418	Sfur000804(--);Sfur001371(MYLK);Sfur003710(DDB_G0271356);Sfur003731(PXN);Sfur015324(-)
GO:0031901	early endosome membrane	12	61	0.394649	0.934418	Sfur000565(SNX4);Sfur000770(TMEM165);Sfur000808(PLD3);Sfur001363(MTMR2);Sfur001638(Ttpa);Sfur003580(MARCHF8);Sfur007718(Dagla);Sfur008433(CLN3);Sfur008831(CLVS1);Sfur008921(Rcc2);Sfur009204(--);Sfur009969(--)
GO:0098852	lytic vacuole membrane	28	149	0.397326	0.934418	Sfur000035(csbC);Sfur000424(CG17119);Sfur000770(TMEM165);Sfur000838(SLC26A11);Sfur001004(atp6v0a1);Sfur002443(znrf2);Sfur003329(--);Sfur003517(--);Sfur003657(--);Sfur003664(Pex23);Sfur003666(unc-64);Sfur003819(Cd63);Sfur004681(Slc17a5);Sfur004759(MFSD12);Sfur005197(Hgsnat);Sfur007288(LRP1);Sfur008260(Slc7a5);Sfur008433(CLN3);Sfur008572(path);Sfur009969(--);Sfur010066(path);Sfur010342(path);Sfur01…
GO:0042383	sarcolemma	9	45	0.402547	0.934418	Sfur000167(STAC2);Sfur000219(FLNA);Sfur002888(Slc8a1);Sfur003765(--);Sfur004229(Eppin);Sfur005596(Ank3);Sfur006971(Agrn);Sfur007915(--);Sfur015324(-)
GO:0030315	T-tubule	3	13	0.412219	0.934418	Sfur002888(Slc8a1);Sfur003765(--);Sfur005596(Ank3)
GO:0031941	filamentous actin	3	13	0.412219	0.934418	Sfur003658(Smtn);Sfur004335(MYO3A);Sfur013089(--)
GO:0098533	ATPase dependent transmembrane transport complex	3	13	0.412219	0.934418	Sfur010345(abcG23);Sfur012519(abcG23);Sfur014302(ABCB6)
GO:0005902	microvillus	8	40	0.414876	0.934418	MSTRG.21722(ck);Sfur000821(DCXR);Sfur006233(ATP7A);Sfur006538(Ca9);Sfur007535(SLC26A2);Sfur007578(Slc27a4);Sfur008260(Slc7a5);Sfur008930(Cbr3)
GO:0030666	endocytic vesicle membrane	8	40	0.414876	0.934418	Sfur001004(atp6v0a1);Sfur003517(--);Sfur004248(AP2M1);Sfur006233(ATP7A);Sfur007288(LRP1);Sfur007825(RAB11FIP5);Sfur009600(VAV3);Sfur009680(VAV3)
GO:0044447	axoneme part	8	40	0.414876	0.934418	Sfur001301(Dnah1);Sfur001975(ccdc103);Sfur002511(--);Sfur011066(DNAL1);Sfur012390(CFAP206);Sfur013083(Spag6);Sfur013114(cep162);Sfur013303(CFAP20)
GO:0016020	membrane	714	4009	0.426923	0.934418	MSTRG.10604(dnm1l);MSTRG.14537(ELOVL);MSTRG.14666(Stt3a);MSTRG.14807(SWEET14);MSTRG.14814(SLC2A3);MSTRG.14815(SLC2A3);MSTRG.15131(BAMBI);MSTRG.1537(SYMPK);MSTRG.15448(Calcrl);MSTRG.15727(ACAA2);MSTRG.1598(AAEL008004);MSTRG.17552(C5);MSTRG.21722(ck);MSTRG.2174(--);MSTRG.2266(--);MSTRG.23721(ADCY9);MSTRG.32264(CG1139);MSTRG.3233(SI);MSTRG.32397(Hspa2);MSTRG.32447(NINJ1);MSTRG.34003(Hsc70-3);MSTRG.3…
GO:0016461	unconventional myosin complex	2	8	0.427884	0.934418	MSTRG.21722(ck);Sfur009080(Mlc-c)
GO:0030430	host cell cytoplasm	2	8	0.427884	0.934418	Sfur007273(LMAN1);Sfur007556(RAB29)
GO:0005657	replication fork	14	74	0.439749	0.934418	Sfur000070(pola1);Sfur000171(--);Sfur000803(uhrf1);Sfur001206(Timeless);Sfur003256(Rfc5);Sfur005462(RpA-70);Sfur008184(DNApol-delta);Sfur008486(DNApol-alpha60);Sfur009691(DNApol-delta);Sfur009804(wdhd1);Sfur010278(hmces);Sfur010285(POLE3);Sfur011216(Pole);Sfur013525(chtf18)
GO:0001725	stress fiber	4	19	0.441763	0.934418	Sfur000804(--);Sfur001371(MYLK);Sfur003710(DDB_G0271356);Sfur003731(PXN)
GO:0097517	contractile actin filament bundle	4	19	0.441763	0.934418	Sfur000804(--);Sfur001371(MYLK);Sfur003710(DDB_G0271356);Sfur003731(PXN)
GO:0000127	transcription factor TFIIIC complex	1	3	0.442892	0.934418	Sfur000321(Gtf3c1)
GO:0000931	gamma-tubulin large complex	1	3	0.442892	0.934418	Sfur004421(Mzt1)
GO:0001534	radial spoke	1	3	0.442892	0.934418	Sfur012390(CFAP206)
GO:0002081	outer acrosomal membrane	1	3	0.442892	0.934418	Sfur001804(TEKT3)
GO:0002177	manchette	1	3	0.442892	0.934418	Sfur003135(--)
GO:0005677	chromatin silencing complex	1	3	0.442892	0.934418	Sfur006024(BAHD1)
GO:0008274	gamma-tubulin ring complex	1	3	0.442892	0.934418	Sfur004421(Mzt1)
GO:0010009	cytoplasmic side of endosome membrane	1	3	0.442892	0.934418	Sfur009969(--)
GO:0017071	intracellular cyclic nucleotide activated cation channel complex	1	3	0.442892	0.934418	Sfur009374(CNGB1)
GO:0030122	AP-2 adaptor complex	1	3	0.442892	0.934418	Sfur004248(AP2M1)
GO:0030870	Mre11 complex	1	3	0.442892	0.934418	Sfur013892(rad50)
GO:0030956	glutamyl-tRNA(Gln) amidotransferase complex	1	3	0.442892	0.934418	Sfur015226(CPIJ001717)
GO:0031093	platelet alpha granule lumen	1	3	0.442892	0.934418	Sfur008501(SCCPDH)
GO:0031213	RSF complex	1	3	0.442892	0.934418	Sfur012812(RSF1)
GO:0031465	Cul4B-RING E3 ubiquitin ligase complex	1	3	0.442892	0.934418	Sfur002344(l(2)dtl)
GO:0032116	SMC loading complex	1	3	0.442892	0.934418	Sfur006238(NIPBL)
GO:0032301	MutSalpha complex	1	3	0.442892	0.934418	Sfur015216(MSH2)
GO:0033185	dolichol-phosphate-mannose synthase complex	1	3	0.442892	0.934418	Sfur007830(CG10166)
GO:0033270	paranode region of axon	1	3	0.442892	0.934418	Sfur005596(Ank3)
GO:0034448	EGO complex	1	3	0.442892	0.934418	Sfur000079(RRAGA)
GO:0034715	pICln-Sm protein complex	1	3	0.442892	0.934418	Sfur009564(CLNS1A)
GO:0035062	omega speckle	1	3	0.442892	0.934418	Sfur001144(Hrb87F)
GO:0035183	female germline ring canal inner rim	1	3	0.442892	0.934418	Sfur010114(sqh)
GO:0042025	host cell nucleus	1	3	0.442892	0.934418	Sfur006423(PI4KA)
GO:0043196	varicosity	1	3	0.442892	0.934418	Sfur007718(Dagla)
GO:0043291	RAVE complex	1	3	0.442892	0.934418	Sfur006696(DMXL1)
GO:0043527	tRNA methyltransferase complex	1	3	0.442892	0.934418	Sfur003211(Trmt61a)
GO:0045120	pronucleus	1	3	0.442892	0.934418	Sfur013467(Rif1)
GO:0061177	type Is terminal bouton	1	3	0.442892	0.934418	Sfur012489(Abp1)
GO:0061689	tricellular tight junction	1	3	0.442892	0.934418	Sfur001236(Sym)
GO:0070449	elongin complex	1	3	0.442892	0.934418	Sfur014346(gus)
GO:0070876	SOSS complex	1	3	0.442892	0.934418	Sfur004288(inip)
GO:0071546	pi-body	1	3	0.442892	0.934418	Sfur007561(ASZ1)
GO:0071556	integral component of lumenal side of endoplasmic reticulum membrane	1	3	0.442892	0.934418	Sfur004484(Hm13)
GO:0072669	tRNA-splicing ligase complex	1	3	0.442892	0.934418	Sfur001859(Fam98a)
GO:0097134	cyclin E1-CDK2 complex	1	3	0.442892	0.934418	Sfur005415(CycE)
GO:0097425	smooth endoplasmic reticulum part	1	3	0.442892	0.934418	Sfur010881(--)
GO:0098553	lumenal side of endoplasmic reticulum membrane	1	3	0.442892	0.934418	Sfur004484(Hm13)
GO:0098559	cytoplasmic side of early endosome membrane	1	3	0.442892	0.934418	Sfur009969(--)
GO:0098560	cytoplasmic side of late endosome membrane	1	3	0.442892	0.934418	Sfur009969(--)
GO:0098644	complex of collagen trimers	1	3	0.442892	0.934418	Sfur004229(Eppin)
GO:0099617	matrix side of mitochondrial inner membrane	1	3	0.442892	0.934418	Sfur006093(HSD11B2)
GO:1902636	kinociliary basal body	1	3	0.442892	0.934418	Sfur010875(Cdc14a)
GO:1904724	tertiary granule lumen	1	3	0.442892	0.934418	Sfur012400(GGH)
GO:1990075	periciliary membrane compartment	1	3	0.442892	0.934418	Sfur008404(WHRN)
GO:1990131	Gtr1-Gtr2 GTPase complex	1	3	0.442892	0.934418	Sfur000079(RRAGA)
GO:1990184	amino acid transport complex	1	3	0.442892	0.934418	Sfur008260(Slc7a5)
GO:0032153	cell division site	10	52	0.442892	0.934418	Sfur000804(--);Sfur000970(zip);Sfur001371(MYLK);Sfur004029(ppp1cc-a);Sfur004157(ppp1cc-a);Sfur007859(scra);Sfur009889(Sep2);Sfur010114(sqh);Sfur014357(zip);Sfur015102(Hmcn1)
GO:0044444	cytoplasmic part	790	4444	0.450502	0.947552	MSTRG.10604(dnm1l);MSTRG.14537(ELOVL);MSTRG.14617(RANBP1);MSTRG.15727(ACAA2);MSTRG.2001(Pde11);MSTRG.2005(UGGT1);MSTRG.21722(ck);MSTRG.22416(DCPS);MSTRG.22969(--);MSTRG.23723(lva);MSTRG.29743(nas-13);MSTRG.32159(Mylk);MSTRG.32162(unc-89);MSTRG.32164(CCDC141);MSTRG.3233(SI);MSTRG.32397(Hspa2);MSTRG.34003(Hsc70-3);MSTRG.34004(Hsc70-3);MSTRG.36572(smc1a);MSTRG.36634(IHH);MSTRG.36688(UPP2);MSTRG.3881…
GO:0005765	lysosomal membrane	27	147	0.451215	0.947552	Sfur000035(csbC);Sfur000424(CG17119);Sfur000770(TMEM165);Sfur000838(SLC26A11);Sfur001004(atp6v0a1);Sfur002443(znrf2);Sfur003329(--);Sfur003517(--);Sfur003657(--);Sfur003664(Pex23);Sfur003666(unc-64);Sfur003819(Cd63);Sfur004681(Slc17a5);Sfur004759(MFSD12);Sfur005197(Hgsnat);Sfur007288(LRP1);Sfur008260(Slc7a5);Sfur008433(CLN3);Sfur008572(path);Sfur009969(--);Sfur010066(path);Sfur010342(path);Sfur01…
GO:0005918	septate junction	7	36	0.459774	0.952434	Sfur000982(l(2)gl);Sfur004571(--);Sfur004921(--);Sfur005332(Nrg);Sfur007483(--);Sfur007575(Cont);Sfur011648(Lac)
GO:0099568	cytoplasmic region	41	226	0.460164	0.952434	MSTRG.21722(ck);Sfur000619(Dhc64C);Sfur000626(Tmod1);Sfur000804(--);Sfur000970(zip);Sfur000982(l(2)gl);Sfur001313(Insc);Sfur001652(alpha-Spec);Sfur001969(GRIK2);Sfur002079(PPP1R9A);Sfur003182(SOD1);Sfur003469(--);Sfur003483(Madm);Sfur003548(SEPTIN4);Sfur003731(PXN);Sfur003997(Ser);Sfur004373(Iqgap1);Sfur004764(RANGAP1);Sfur005048(KIF3A);Sfur005188(--);Sfur005383(--);Sfur005921(spri);Sfur006287(sp…
GO:0005721	pericentric heterochromatin	3	14	0.463033	0.952434	Sfur001142(Esco2);Sfur008806(XNP);Sfur013570(Ncapd3)
GO:0018995	host	3	14	0.463033	0.952434	Sfur006423(PI4KA);Sfur007273(LMAN1);Sfur007556(RAB29)
GO:0043657	host cell	3	14	0.463033	0.952434	Sfur006423(PI4KA);Sfur007273(LMAN1);Sfur007556(RAB29)
GO:0044215	other organism	3	14	0.463033	0.952434	Sfur006423(PI4KA);Sfur007273(LMAN1);Sfur007556(RAB29)
GO:0044216	other organism cell	3	14	0.463033	0.952434	Sfur006423(PI4KA);Sfur007273(LMAN1);Sfur007556(RAB29)
GO:0044217	other organism part	3	14	0.463033	0.952434	Sfur006423(PI4KA);Sfur007273(LMAN1);Sfur007556(RAB29)
GO:1904949	ATPase complex	3	14	0.463033	0.952434	Sfur010345(abcG23);Sfur012519(abcG23);Sfur014302(ABCB6)
GO:0044306	neuron projection terminus	12	64	0.464734	0.95376	Sfur000405(Ptbp1);Sfur001969(GRIK2);Sfur002888(Slc8a1);Sfur003329(--);Sfur003666(unc-64);Sfur006167(--);Sfur006724(Pcsk1);Sfur009374(CNGB1);Sfur012301(BLVRB);Sfur012489(Abp1);Sfur013148(HNRNPR);Sfur014303(SLC18A2)
GO:0005923	bicellular tight junction	8	42	0.47284	0.968196	Sfur002456(ccdc85c);Sfur005332(Nrg);Sfur006256(SYMPK);Sfur006776(ASH1L);Sfur008028(TBCD);Sfur010240(Wnk3);Sfur010439(Shroom2);Sfur012596(RAP2C)
GO:0008021	synaptic vesicle	21	115	0.477096	0.974002	Sfur000035(csbC);Sfur000322(SLC2A7);Sfur000702(Svopl);Sfur001898(Gabbr1);Sfur002072(Ppt1);Sfur002158(dnm1l);Sfur003329(--);Sfur003650(DNM1L);Sfur003666(unc-64);Sfur003756(slc17a8);Sfur004681(Slc17a5);Sfur006059(SLC17A7);Sfur006631(Sv2b);Sfur006696(DMXL1);Sfur007281(Svop);Sfur008211(VAT1L);Sfur008433(CLN3);Sfur009383(flower);Sfur010346(otof);Sfur012122(stac);Sfur014303(SLC18A2)
GO:0016328	lateral plasma membrane	6	31	0.477833	0.974002	Sfur001652(alpha-Spec);Sfur004373(Iqgap1);Sfur005596(Ank3);Sfur008028(TBCD);Sfur010714(Pis);Sfur011914(ABCC1)
GO:0043204	perikaryon	14	76	0.482694	0.981696	Sfur001318(rg);Sfur001541(rg);Sfur001588(rg);Sfur001608(rg);Sfur001969(GRIK2);Sfur004822(tdc-1);Sfur006233(ATP7A);Sfur006345(--);Sfur006724(Pcsk1);Sfur008572(path);Sfur010066(path);Sfur010310(ple);Sfur010342(path);Sfur015338(PDE10A)
GO:0033177	proton-transporting two-sector ATPase complex, proton-transporting domain	4	20	0.483962	0.982063	Sfur001004(atp6v0a1);Sfur009516(ATP6V0B);Sfur011405(VhaAC39-1);Sfur013642(ATP6V0D1)
GO:0098805	whole membrane	196	1102	0.487645	0.985804	MSTRG.21722(ck);MSTRG.3233(SI);MSTRG.36634(IHH);MSTRG.38817(Itpr);Sfur000035(csbC);Sfur000079(RRAGA);Sfur000082(stan);Sfur000193(Pnliprp2);Sfur000224(NLGN4Y);Sfur000240(HADHB);Sfur000424(CG17119);Sfur000490(--);Sfur000492(Vps13);Sfur000565(SNX4);Sfur000702(Svopl);Sfur000712(PEX11G);Sfur000770(TMEM165);Sfur000808(PLD3);Sfur000838(SLC26A11);Sfur000982(l(2)gl);Sfur001001(SCARB1);Sfur001004(atp6v0a1)…
GO:0005802	trans-Golgi network	20	110	0.48799	0.985804	Sfur000770(TMEM165);Sfur001638(Ttpa);Sfur001906(ARFGEF1);Sfur003112(brun);Sfur003765(--);Sfur006233(ATP7A);Sfur006724(Pcsk1);Sfur007556(RAB29);Sfur008300(Coro7);Sfur008433(CLN3);Sfur008554(ARL5B);Sfur008831(CLVS1);Sfur008908(Tgfbi);Sfur009204(--);Sfur009218(--);Sfur011472(-);Sfur011723(Atp11a);Sfur011786(Wdr11);Sfur012084(Atp11a);Sfur013935(brun)
GO:0005905	coated pit	7	37	0.490566	0.988797	Sfur002158(dnm1l);Sfur002672(Lrp2);Sfur003650(DNM1L);Sfur003765(--);Sfur004248(AP2M1);Sfur005461(Ldlr);Sfur007288(LRP1)
GO:0016580	Sin3 complex	2	9	0.49204	0.98956	Sfur004083(Morf4l1);Sfur004267(Morf4l1)
GO:0005901	caveola	5	26	0.499015	0.994057	Sfur001001(SCARB1);Sfur007797(BMPR2);Sfur007895(SCARB2);Sfur008433(CLN3);Sfur008714(Kif18a)
GO:0031201	SNARE complex	5	26	0.499015	0.994057	Sfur000565(SNX4);Sfur003329(--);Sfur003666(unc-64);Sfur004599(use1);Sfur010881(--)
GO:0005814	centriole	11	60	0.502833	0.994057	Sfur000095(polo);Sfur001116(ctp);Sfur001320(cep135);Sfur003655(Rttn);Sfur008880(neurl4);Sfur009115(Ift140);Sfur009496(SAK);Sfur009752(BIRC6);Sfur013114(cep162);Sfur013979(TSSK2);Sfur014379(Cep78)
GO:0070603	SWI/SNF superfamily-type complex	11	60	0.502833	0.994057	Sfur001869(Act5C);Sfur003025(ACTL6B);Sfur006908(Bap60);Sfur009576(SS18L1);Sfur009742(Sall3);Sfur010285(POLE3);Sfur010534(ACTR6);Sfur011893(SMARCC2);Sfur012812(RSF1);Sfur014542(osa);Sfur014709(brm)
GO:0032155	cell division site part	9	49	0.510743	0.994057	Sfur000804(--);Sfur000970(zip);Sfur001371(MYLK);Sfur004029(ppp1cc-a);Sfur004157(ppp1cc-a);Sfur007859(scra);Sfur010114(sqh);Sfur014357(zip);Sfur015102(Hmcn1)
GO:0005925	focal adhesion	15	83	0.511094	0.994057	Sfur001151(PDIA3);Sfur002128(Lar);Sfur003710(DDB_G0271356);Sfur003731(PXN);Sfur004295(--);Sfur004373(Iqgap1);Sfur005383(--);Sfur006167(--);Sfur006423(PI4KA);Sfur006939(F42H10.3);Sfur007288(LRP1);Sfur008802(NPHS1);Sfur009553(BCAR3);Sfur012055(KIRREL3);Sfur014883(PPFIA1)
GO:0005782	peroxisomal matrix	3	15	0.511817	0.994057	Sfur000157(HAO1);Sfur002897(Eci2);Sfur005193(Mvd)
GO:0031907	microbody lumen	3	15	0.511817	0.994057	Sfur000157(HAO1);Sfur002897(Eci2);Sfur005193(Mvd)
GO:0036379	myofilament	3	15	0.511817	0.994057	Sfur000626(Tmod1);Sfur001439(up);Sfur010033(fln)
GO:0070847	core mediator complex	3	15	0.511817	0.994057	Sfur010563(MED6);Sfur012341(MED6);Sfur014137(MED14)
GO:0043679	axon terminus	10	55	0.519093	0.994057	Sfur001969(GRIK2);Sfur002888(Slc8a1);Sfur003329(--);Sfur003666(unc-64);Sfur006724(Pcsk1);Sfur009374(CNGB1);Sfur012301(BLVRB);Sfur012489(Abp1);Sfur013148(HNRNPR);Sfur014303(SLC18A2)
GO:0000407	pre-autophagosomal structure	4	21	0.524816	0.994057	Sfur005841(RB1CC1);Sfur008091(RB1CC1);Sfur009189(ATG9A);Sfur013517(ATG16L1)
GO:0031983	vesicle lumen	4	21	0.524816	0.994057	Sfur005445(PRDX4);Sfur006724(Pcsk1);Sfur008501(SCCPDH);Sfur012400(GGH)
GO:0034774	secretory granule lumen	4	21	0.524816	0.994057	Sfur005445(PRDX4);Sfur006724(Pcsk1);Sfur008501(SCCPDH);Sfur012400(GGH)
GO:0043198	dendritic shaft	4	21	0.524816	0.994057	Sfur000112(ZMYND8);Sfur001898(Gabbr1);Sfur002888(Slc8a1);Sfur008404(WHRN)
GO:0044304	main axon	4	21	0.524816	0.994057	Sfur001898(Gabbr1);Sfur003997(Ser);Sfur005596(Ank3);Sfur007718(Dagla)
GO:0045111	intermediate filament cytoskeleton	4	21	0.524816	0.994057	MSTRG.36688(UPP2);Sfur001901(DDX60);Sfur012938(Ldlrap1);Sfur013255(DDX60)
GO:0060205	cytoplasmic membrane-bounded vesicle lumen	4	21	0.524816	0.994057	Sfur005445(PRDX4);Sfur006724(Pcsk1);Sfur008501(SCCPDH);Sfur012400(GGH)
GO:0001750	photoreceptor outer segment	5	27	0.534829	0.994057	Sfur001333(tropG);Sfur002323(Mak);Sfur003677(RDH14);Sfur009115(Ift140);Sfur009374(CNGB1)
GO:0005770	late endosome	23	130	0.539121	0.994057	Sfur000492(Vps13);Sfur000770(TMEM165);Sfur000808(PLD3);Sfur003099(grin2b);Sfur003819(Cd63);Sfur004759(MFSD12);Sfur005057(DERL1);Sfur005461(Ldlr);Sfur005509(Nct);Sfur006233(ATP7A);Sfur006539(--);Sfur008433(CLN3);Sfur008572(path);Sfur008771(Ttpa);Sfur009189(ATG9A);Sfur009485(CLVS1);Sfur009864(CLVS1);Sfur009969(--);Sfur010052(chmp2b);Sfur010066(path);Sfur010342(path);Sfur010740(sca);Sfur012122(stac)
GO:0044463	cell projection part	89	505	0.541216	0.994057	MSTRG.21722(ck);MSTRG.32397(Hspa2);Sfur000112(ZMYND8);Sfur000294(EFHC2);Sfur000405(Ptbp1);Sfur000560(Tekt4);Sfur000619(Dhc64C);Sfur000736(--);Sfur001004(atp6v0a1);Sfur001156(--);Sfur001301(Dnah1);Sfur001591(SLC9C1);Sfur001898(Gabbr1);Sfur001926(hum-6);Sfur001969(GRIK2);Sfur001975(ccdc103);Sfur002079(PPP1R9A);Sfur002098(--);Sfur002318(Ift172);Sfur002323(Mak);Sfur002511(--);Sfur002672(Lrp2);Sfur002…
GO:0000220	vacuolar proton-transporting V-type ATPase, V0 domain	1	4	0.541613	0.994057	Sfur001004(atp6v0a1)
GO:0000322	storage vacuole	1	4	0.541613	0.994057	Sfur011075(--)
GO:0000506	glycosylphosphatidylinositol-N-acetylglucosaminyltransferase (GPI-GnT) complex	1	4	0.541613	0.994057	Sfur014370(Pigp)
GO:0000839	Hrd1p ubiquitin ligase ERAD-L complex	1	4	0.541613	0.994057	Sfur005057(DERL1)
GO:0002080	acrosomal membrane	1	4	0.541613	0.994057	Sfur001804(TEKT3)
GO:0005722	beta-heterochromatin	1	4	0.541613	0.994057	Sfur008806(XNP)
GO:0005726	perichromatin fibrils	1	4	0.541613	0.994057	Sfur003002(mle)
GO:0005940	septin ring	1	4	0.541613	0.994057	Sfur009889(Sep2)
GO:0008623	CHRAC	1	4	0.541613	0.994057	Sfur010285(POLE3)
GO:0031501	mannosyltransferase complex	1	4	0.541613	0.994057	Sfur007830(CG10166)
GO:0034709	methylosome	1	4	0.541613	0.994057	Sfur009564(CLNS1A)
GO:0042587	glycogen granule	1	4	0.541613	0.994057	Sfur002528(Fasn)
GO:0044300	cerebellar mossy fiber	1	4	0.541613	0.994057	Sfur006059(SLC17A7)
GO:0044611	nuclear pore inner ring	1	4	0.541613	0.994057	Sfur015099(--)
GO:0044614	nuclear pore cytoplasmic filaments	1	4	0.541613	0.994057	Sfur004764(RANGAP1)
GO:0070765	gamma-secretase complex	1	4	0.541613	0.994057	Sfur005509(Nct)
GO:0070776	MOZ/MORF histone acetyltransferase complex	1	4	0.541613	0.994057	Sfur000997(Phf14)
GO:0070937	CRD-mediated mRNA stability complex	1	4	0.541613	0.994057	Sfur003002(mle)
GO:0071797	LUBAC complex	1	4	0.541613	0.994057	Sfur001830(LUBEL)
GO:0098574	cytoplasmic side of lysosomal membrane	1	4	0.541613	0.994057	Sfur009969(--)
GO:0098591	external side of apical plasma membrane	1	4	0.541613	0.994057	Sfur008260(Slc7a5)
GO:1990726	Lsm1-7-Pat1 complex	1	4	0.541613	0.994057	Sfur014004(LSM3)
GO:0005865	striated muscle thin filament	2	10	0.551434	0.999889	Sfur000626(Tmod1);Sfur001439(up)
GO:0017119	Golgi transport complex	2	10	0.551434	0.999889	Sfur012247(Cog7);Sfur013624(CG1968)
GO:0046658	anchored component of plasma membrane	2	10	0.551434	0.999889	Sfur000490(--);Sfur008676(Mipp1)
GO:0071014	post-mRNA release spliceosomal complex	2	10	0.551434	0.999889	Sfur002293(HNRNPM);Sfur005096(Cwf19l1)
GO:0071683	sensory dendrite	2	10	0.551434	0.999889	Sfur004151(DCX-EMAP);Sfur004232(DCX-EMAP)
GO:0098595	perivitelline space	2	10	0.551434	0.999889	Sfur007736(flz);Sfur011413(ea)
GO:0043025	neuronal cell body	43	245	0.553974	1	Sfur001318(rg);Sfur001541(rg);Sfur001562(KLK13);Sfur001588(rg);Sfur001608(rg);Sfur001898(Gabbr1);Sfur001969(GRIK2);Sfur002072(Ppt1);Sfur002079(PPP1R9A);Sfur002558(Pdi);Sfur002888(Slc8a1);Sfur003132(DAT);Sfur003182(SOD1);Sfur003582(Ect4);Sfur003690(--);Sfur004822(tdc-1);Sfur005332(Nrg);Sfur005404(Rrm1);Sfur005796(Pal1);Sfur006167(--);Sfur006233(ATP7A);Sfur006345(--);Sfur006724(Pcsk1);Sfur007288(LR…
GO:0089717	spanning component of membrane	3	16	0.558137	1	Sfur000224(NLGN4Y);Sfur007797(BMPR2);Sfur009383(flower)
GO:0034707	chloride channel complex	4	22	0.564037	1	Sfur002394(Ano4);Sfur003310(ggr-1);Sfur010100(BEST3);Sfur013450(ClC-a)
GO:0035267	NuA4 histone acetyltransferase complex	4	22	0.564037	1	Sfur000927(Mrgbp);Sfur003025(ACTL6B);Sfur004083(Morf4l1);Sfur004267(Morf4l1)
GO:0042641	actomyosin	4	22	0.564037	1	Sfur000804(--);Sfur001371(MYLK);Sfur003710(DDB_G0271356);Sfur003731(PXN)
GO:0044295	axonal growth cone	4	22	0.564037	1	Sfur002672(Lrp2);Sfur006971(Agrn);Sfur007288(LRP1);Sfur009965(Itpr)
GO:0005938	cell cortex	33	189	0.567236	1	MSTRG.21722(ck);Sfur000619(Dhc64C);Sfur000626(Tmod1);Sfur000804(--);Sfur000970(zip);Sfur000982(l(2)gl);Sfur001313(Insc);Sfur001652(alpha-Spec);Sfur002079(PPP1R9A);Sfur003469(--);Sfur003483(Madm);Sfur003548(SEPTIN4);Sfur003731(PXN);Sfur003997(Ser);Sfur004373(Iqgap1);Sfur005921(spri);Sfur006287(spri);Sfur006377(Dlish);Sfur006482(spri);Sfur006496(--);Sfur007859(scra);Sfur009051(Lancl2);Sfur009889(Se…
GO:0044297	cell body	49	281	0.574265	1	MSTRG.32397(Hspa2);MSTRG.36382(SLC25A27);MSTRG.7349(Rheb);Sfur001318(rg);Sfur001541(rg);Sfur001562(KLK13);Sfur001588(rg);Sfur001608(rg);Sfur001898(Gabbr1);Sfur001969(GRIK2);Sfur002072(Ppt1);Sfur002079(PPP1R9A);Sfur002558(Pdi);Sfur002888(Slc8a1);Sfur003132(DAT);Sfur003182(SOD1);Sfur003582(Ect4);Sfur003690(--);Sfur004822(tdc-1);Sfur005332(Nrg);Sfur005404(Rrm1);Sfur005796(Pal1);Sfur006167(--);Sfur00…
GO:0005741	mitochondrial outer membrane	15	87	0.590436	1	Sfur000240(HADHB);Sfur002158(dnm1l);Sfur003266(Akap1);Sfur003650(DNM1L);Sfur005383(--);Sfur005401(myo19);Sfur008362(boka);Sfur008684(MTARC1);Sfur010046(CPT1B);Sfur010138(Mtch2);Sfur012970(GPAM);Sfur012982(Acsl1);Sfur013509(Tspo);Sfur014127(Lpin1);Sfur014302(ABCB6)
GO:0098791	Golgi subcompartment	31	180	0.600297	1	Sfur000770(TMEM165);Sfur001638(Ttpa);Sfur001835(FucTA);Sfur001906(ARFGEF1);Sfur001931(Pgant7);Sfur002923(Pgant2);Sfur003112(brun);Sfur003765(--);Sfur006233(ATP7A);Sfur006715(CHSY1);Sfur006724(Pcsk1);Sfur006992(TMED2);Sfur007556(RAB29);Sfur008300(Coro7);Sfur008317(Golga2);Sfur008433(CLN3);Sfur008554(ARL5B);Sfur008831(CLVS1);Sfur008908(Tgfbi);Sfur009204(--);Sfur009218(--);Sfur009795(B3GALT6);Sfur01…
GO:0005858	axonemal dynein complex	4	23	0.601406	1	Sfur001301(Dnah1);Sfur001975(ccdc103);Sfur002511(--);Sfur011066(DNAL1)
GO:0043189	H4/H2A histone acetyltransferase complex	4	23	0.601406	1	Sfur000927(Mrgbp);Sfur003025(ACTL6B);Sfur004083(Morf4l1);Sfur004267(Morf4l1)
GO:1902562	H4 histone acetyltransferase complex	4	23	0.601406	1	Sfur000927(Mrgbp);Sfur003025(ACTL6B);Sfur004083(Morf4l1);Sfur004267(Morf4l1)
GO:0005637	nuclear inner membrane	3	17	0.601698	1	Sfur011683(MFSD10);Sfur012887(Dpy19l1);Sfur015211(Zmpste24)
GO:0030992	intraciliary transport particle B	3	17	0.601698	1	Sfur001170(IFT27);Sfur002318(Ift172);Sfur011133(Traf3ip1)
GO:0030285	integral component of synaptic vesicle membrane	5	29	0.602637	1	Sfur000702(Svopl);Sfur003756(slc17a8);Sfur006059(SLC17A7);Sfur006631(Sv2b);Sfur009383(flower)
GO:0044853	plasma membrane raft	5	29	0.602637	1	Sfur001001(SCARB1);Sfur007797(BMPR2);Sfur007895(SCARB2);Sfur008433(CLN3);Sfur008714(Kif18a)
GO:0005839	proteasome core complex	2	11	0.605738	1	Sfur003933(PSMA6);Sfur009256(PSMA7)
GO:0016442	RISC complex	2	11	0.605738	1	Sfur003002(mle);Sfur009998(SND1)
GO:0030312	external encapsulating structure	2	11	0.605738	1	MSTRG.21722(ck);Sfur000653(Pxd)
GO:0030673	axolemma	2	11	0.605738	1	Sfur001898(Gabbr1);Sfur003997(Ser)
GO:0032809	neuronal cell body membrane	2	11	0.605738	1	Sfur003132(DAT);Sfur006167(--)
GO:0032994	protein-lipid complex	2	11	0.605738	1	Sfur005461(Ldlr);Sfur007189(PCYOX1)
GO:0034518	RNA cap binding complex	2	11	0.605738	1	Sfur006845(Cbp80);Sfur009741(Rnmt)
GO:0044298	cell body membrane	2	11	0.605738	1	Sfur003132(DAT);Sfur006167(--)
GO:0016592	mediator complex	7	41	0.606923	1	Sfur000721(MED21);Sfur002437(cdk9);Sfur009562(MED11);Sfur010563(MED6);Sfur012341(MED6);Sfur014137(MED14);Sfur014170(MED24)
GO:0043195	terminal bouton	7	41	0.606923	1	Sfur001969(GRIK2);Sfur003329(--);Sfur003666(unc-64);Sfur009374(CNGB1);Sfur012301(BLVRB);Sfur012489(Abp1);Sfur014303(SLC18A2)
GO:0043296	apical junction complex	15	88	0.60943	1	Sfur000982(l(2)gl);Sfur002456(ccdc85c);Sfur004483(lft);Sfur004571(--);Sfur004921(--);Sfur005332(Nrg);Sfur006256(SYMPK);Sfur006776(ASH1L);Sfur007483(--);Sfur007575(Cont);Sfur008028(TBCD);Sfur010240(Wnk3);Sfur010439(Shroom2);Sfur011648(Lac);Sfur012596(RAP2C)
GO:0070382	exocytic vesicle	21	123	0.611549	1	Sfur000035(csbC);Sfur000322(SLC2A7);Sfur000702(Svopl);Sfur001898(Gabbr1);Sfur002072(Ppt1);Sfur002158(dnm1l);Sfur003329(--);Sfur003650(DNM1L);Sfur003666(unc-64);Sfur003756(slc17a8);Sfur004681(Slc17a5);Sfur006059(SLC17A7);Sfur006631(Sv2b);Sfur006696(DMXL1);Sfur007281(Svop);Sfur008211(VAT1L);Sfur008433(CLN3);Sfur009383(flower);Sfur010346(otof);Sfur012122(stac);Sfur014303(SLC18A2)
GO:0005578	proteinaceous extracellular matrix	9	53	0.612078	1	Sfur004229(Eppin);Sfur006971(Agrn);Sfur007492(--);Sfur008550(Hspg2);Sfur009218(--);Sfur010462(LanB2);Sfur013084(--);Sfur013442(--);Sfur015102(Hmcn1)
GO:0030426	growth cone	11	65	0.61744	1	Sfur002079(PPP1R9A);Sfur002672(Lrp2);Sfur004373(Iqgap1);Sfur005167(KIF20B);Sfur006971(Agrn);Sfur007288(LRP1);Sfur008404(WHRN);Sfur009965(Itpr);Sfur011425(--);Sfur012489(Abp1);Sfur013148(HNRNPR)
GO:0030427	site of polarized growth	12	71	0.62012	1	Sfur002079(PPP1R9A);Sfur002672(Lrp2);Sfur004373(Iqgap1);Sfur005167(KIF20B);Sfur006971(Agrn);Sfur007288(LRP1);Sfur008404(WHRN);Sfur009965(Itpr);Sfur010065(fry);Sfur011425(--);Sfur012489(Abp1);Sfur013148(HNRNPR)
GO:0000137	Golgi cis cisterna	1	5	0.622849	1	Sfur008317(Golga2)
GO:0000835	ER ubiquitin ligase complex	1	5	0.622849	1	Sfur005057(DERL1)
GO:0000836	Hrd1p ubiquitin ligase complex	1	5	0.622849	1	Sfur005057(DERL1)
GO:0001674	female germ cell nucleus	1	5	0.622849	1	Sfur008806(XNP)
GO:0005641	nuclear envelope lumen	1	5	0.622849	1	Sfur006841(PTGES)
GO:0005662	DNA replication factor A complex	1	5	0.622849	1	Sfur005462(RpA-70)
GO:0005863	striated muscle myosin thick filament	1	5	0.622849	1	Sfur010033(fln)
GO:0005869	dynactin complex	1	5	0.622849	1	Sfur004159(DCTN2-p50)
GO:0005919	pleated septate junction	1	5	0.622849	1	Sfur005332(Nrg)
GO:0030061	mitochondrial crista	1	5	0.622849	1	Sfur003266(Akap1)
GO:0030128	clathrin coat of endocytic vesicle	1	5	0.622849	1	Sfur004248(AP2M1)
GO:0030132	clathrin coat of coated pit	1	5	0.622849	1	Sfur004248(AP2M1)
GO:0031464	Cul4A-RING E3 ubiquitin ligase complex	1	5	0.622849	1	Sfur002344(l(2)dtl)
GO:0031466	Cul5-RING ubiquitin ligase complex	1	5	0.622849	1	Sfur014346(gus)
GO:0031616	spindle pole centrosome	1	5	0.622849	1	Sfur012709(DLGAP1)
GO:0032281	AMPA glutamate receptor complex	1	5	0.622849	1	Sfur014188(por)
GO:0032585	multivesicular body membrane	1	5	0.622849	1	Sfur003819(Cd63)
GO:0032982	myosin filament	1	5	0.622849	1	Sfur010033(fln)
GO:0034362	low-density lipoprotein particle	1	5	0.622849	1	Sfur005461(Ldlr)
GO:0035580	specific granule lumen	1	5	0.622849	1	Sfur012400(GGH)
GO:0042585	germinal vesicle	1	5	0.622849	1	Sfur008806(XNP)
GO:0061176	type Ib terminal bouton	1	5	0.622849	1	Sfur012489(Abp1)
GO:0090576	RNA polymerase III transcription factor complex	1	5	0.622849	1	Sfur000321(Gtf3c1)
GO:0098554	cytoplasmic side of endoplasmic reticulum membrane	1	5	0.622849	1	Sfur004484(Hm13)
GO:1990716	axonemal central apparatus	1	5	0.622849	1	Sfur013083(Spag6)
GO:0019867	outer membrane	16	95	0.630578	1	Sfur000240(HADHB);Sfur002158(dnm1l);Sfur003266(Akap1);Sfur003650(DNM1L);Sfur005383(--);Sfur005401(myo19);Sfur008362(boka);Sfur008684(MTARC1);Sfur010046(CPT1B);Sfur010138(Mtch2);Sfur012970(GPAM);Sfur012982(Acsl1);Sfur013509(Tspo);Sfur014127(Lpin1);Sfur014302(ABCB6);Sfur014738(--)
GO:0031968	organelle outer membrane	16	95	0.630578	1	Sfur000240(HADHB);Sfur002158(dnm1l);Sfur003266(Akap1);Sfur003650(DNM1L);Sfur005383(--);Sfur005401(myo19);Sfur008362(boka);Sfur008684(MTARC1);Sfur010046(CPT1B);Sfur010138(Mtch2);Sfur012970(GPAM);Sfur012982(Acsl1);Sfur013509(Tspo);Sfur014127(Lpin1);Sfur014302(ABCB6);Sfur014738(--)
GO:0016469	proton-transporting two-sector ATPase complex	6	36	0.633557	1	Sfur001004(atp6v0a1);Sfur001376(--);Sfur009516(ATP6V0B);Sfur011405(VhaAC39-1);Sfur013642(ATP6V0D1);Sfur014686(Atp6v1e2)
GO:0060170	ciliary membrane	4	24	0.636768	1	Sfur001591(SLC9C1);Sfur005382(PKD2);Sfur009374(CNGB1);Sfur009577(Shank3)
GO:0005797	Golgi medial cisterna	3	18	0.642322	1	Sfur001835(FucTA);Sfur009795(B3GALT6);Sfur014714(FucTA)
GO:0031528	microvillus membrane	3	18	0.642322	1	Sfur006538(Ca9);Sfur007535(SLC26A2);Sfur008260(Slc7a5)
GO:0005924	cell-substrate adherens junction	18	108	0.652073	1	MSTRG.32397(Hspa2);MSTRG.34003(Hsc70-3);MSTRG.34004(Hsc70-3);Sfur001151(PDIA3);Sfur002128(Lar);Sfur003710(DDB_G0271356);Sfur003731(PXN);Sfur004295(--);Sfur004373(Iqgap1);Sfur005383(--);Sfur006167(--);Sfur006423(PI4KA);Sfur006939(F42H10.3);Sfur007288(LRP1);Sfur008802(NPHS1);Sfur009553(BCAR3);Sfur012055(KIRREL3);Sfur014883(PPFIA1)
GO:0030140	trans-Golgi network transport vesicle	2	12	0.654891	1	Sfur003765(--);Sfur006233(ATP7A)
GO:0031332	RNAi effector complex	2	12	0.654891	1	Sfur003002(mle);Sfur009998(SND1)
GO:0070822	Sin3-type complex	2	12	0.654891	1	Sfur004083(Morf4l1);Sfur004267(Morf4l1)
GO:0016363	nuclear matrix	7	43	0.659481	1	Sfur000070(pola1);Sfur001080(Ppig);Sfur001100(--);Sfur001906(ARFGEF1);Sfur003933(PSMA6);Sfur004627(Stag1);Sfur011189(kif4)
GO:0031234	extrinsic component of cytoplasmic side of plasma membrane	6	37	0.661233	1	Sfur000167(STAC2);Sfur002202(Src64B);Sfur002767(Src64B);Sfur004373(Iqgap1);Sfur007922(TEK);Sfur009577(Shank3)
GO:0005737	cytoplasm	991	5635	0.668122	1	MSTRG.10604(dnm1l);MSTRG.14537(ELOVL);MSTRG.14617(RANBP1);MSTRG.15727(ACAA2);MSTRG.2001(Pde11);MSTRG.2005(UGGT1);MSTRG.21722(ck);MSTRG.22416(DCPS);MSTRG.22969(--);MSTRG.23723(lva);MSTRG.29743(nas-13);MSTRG.32159(Mylk);MSTRG.32162(unc-89);MSTRG.32164(CCDC141);MSTRG.3233(SI);MSTRG.32397(Hspa2);MSTRG.34003(Hsc70-3);MSTRG.34004(Hsc70-3);MSTRG.36572(smc1a);MSTRG.36634(IHH);MSTRG.36688(UPP2);MSTRG.3881…
GO:0030055	cell-substrate junction	18	109	0.668164	1	MSTRG.32397(Hspa2);MSTRG.34003(Hsc70-3);MSTRG.34004(Hsc70-3);Sfur001151(PDIA3);Sfur002128(Lar);Sfur003710(DDB_G0271356);Sfur003731(PXN);Sfur004295(--);Sfur004373(Iqgap1);Sfur005383(--);Sfur006167(--);Sfur006423(PI4KA);Sfur006939(F42H10.3);Sfur007288(LRP1);Sfur008802(NPHS1);Sfur009553(BCAR3);Sfur012055(KIRREL3);Sfur014883(PPFIA1)
GO:0044427	chromosomal part	105	614	0.676838	1	MSTRG.36572(smc1a);MSTRG.7293(--);Sfur000038(BUB1);Sfur000070(pola1);Sfur000071(Mcm7);Sfur000095(polo);Sfur000145(Mcm7);Sfur000171(--);Sfur000619(Dhc64C);Sfur000803(uhrf1);Sfur001100(--);Sfur001142(Esco2);Sfur001144(Hrb87F);Sfur001206(Timeless);Sfur001323(SOX5);Sfur001686(Kr);Sfur001825(--);Sfur001869(Act5C);Sfur002054(kni);Sfur002315(dpa);Sfur002398(ZFHX4);Sfur002555(arpc1a-b);Sfur002833(eg);Sfu…
GO:0008287	protein serine/threonine phosphatase complex	3	19	0.679926	1	Sfur004029(ppp1cc-a);Sfur004157(ppp1cc-a);Sfur011478(PPP1R3C)
GO:0043186	P granule	3	19	0.679926	1	Sfur000483(PKLR);Sfur007561(ASZ1);Sfur008511(PyK)
GO:0060293	germ plasm	3	19	0.679926	1	Sfur000483(PKLR);Sfur007561(ASZ1);Sfur008511(PyK)
GO:0070069	cytochrome complex	3	19	0.679926	1	Sfur005773(COX5A);Sfur013176(Cox6a1);Sfur014287(COX4I2)
GO:1903293	phosphatase complex	3	19	0.679926	1	Sfur004029(ppp1cc-a);Sfur004157(ppp1cc-a);Sfur011478(PPP1R3C)
GO:0000242	pericentriolar material	1	6	0.689696	1	Sfur005101(CDK5RAP2)
GO:0000803	sex chromosome	1	6	0.689696	1	Sfur001142(Esco2)
GO:0000815	ESCRT III complex	1	6	0.689696	1	Sfur010052(chmp2b)
GO:0001891	phagocytic cup	1	6	0.689696	1	Sfur001926(hum-6)
GO:0005701	polytene chromosome chromocenter	1	6	0.689696	1	Sfur008806(XNP)
GO:0016581	NuRD complex	1	6	0.689696	1	Sfur009742(Sall3)
GO:0019028	viral capsid	1	6	0.689696	1	Sfur011543(--)
GO:0031082	BLOC complex	1	6	0.689696	1	Sfur005188(--)
GO:0032300	mismatch repair complex	1	6	0.689696	1	Sfur015216(MSH2)
GO:0032797	SMN complex	1	6	0.689696	1	Sfur000549(STRAP)
GO:0032983	kainate selective glutamate receptor complex	1	6	0.689696	1	Sfur001969(GRIK2)
GO:0035578	azurophil granule lumen	1	6	0.689696	1	Sfur012400(GGH)
GO:0043194	axon initial segment	1	6	0.689696	1	Sfur005596(Ank3)
GO:0043240	Fanconi anaemia nuclear complex	1	6	0.689696	1	Sfur004940(PGBD2)
GO:0044233	ER-mitochondrion membrane contact site	1	6	0.689696	1	Sfur010881(--)
GO:0044754	autolysosome	1	6	0.689696	1	Sfur008433(CLN3)
GO:0045170	spectrosome	1	6	0.689696	1	Sfur001652(alpha-Spec)
GO:0055120	striated muscle dense body	1	6	0.689696	1	Sfur006939(F42H10.3)
GO:0070578	RISC-loading complex	1	6	0.689696	1	Sfur003002(mle)
GO:0090545	CHD-type complex	1	6	0.689696	1	Sfur009742(Sall3)
GO:0005685	U1 snRNP	2	13	0.699014	1	Sfur000443(SmD2);Sfur010768(snRNP-U1-70K)
GO:0044232	organelle membrane contact site	2	13	0.699014	1	Sfur010636(Mospd2);Sfur010881(--)
GO:0045239	tricarboxylic acid cycle enzyme complex	2	13	0.699014	1	Sfur014793(OGDH);Sfur015330(ogdh-1)
GO:0031513	nonmotile primary cilium	10	63	0.699843	1	MSTRG.21722(ck);Sfur001333(tropG);Sfur002323(Mak);Sfur003677(RDH14);Sfur005992(Cad87A);Sfur008404(WHRN);Sfur009115(Ift140);Sfur009374(CNGB1);Sfur010875(Cdc14a);Sfur013669(Cdh23)
GO:0072372	primary cilium	10	63	0.699843	1	MSTRG.21722(ck);Sfur001333(tropG);Sfur002323(Mak);Sfur003677(RDH14);Sfur005992(Cad87A);Sfur008404(WHRN);Sfur009115(Ift140);Sfur009374(CNGB1);Sfur010875(Cdc14a);Sfur013669(Cdh23)
GO:0045495	pole plasm	4	26	0.701113	1	Sfur000483(PKLR);Sfur007561(ASZ1);Sfur008511(PyK);Sfur014346(gus)
GO:0030117	membrane coat	7	45	0.707547	1	Sfur001531(COPB1);Sfur004248(AP2M1);Sfur004693(COPE);Sfur004863(SEC24C);Sfur011598(Pdcd6);Sfur012403(SEC31A);Sfur014226(gammaCop)
GO:0048475	coated membrane	7	45	0.707547	1	Sfur001531(COPB1);Sfur004248(AP2M1);Sfur004693(COPE);Sfur004863(SEC24C);Sfur011598(Pdcd6);Sfur012403(SEC31A);Sfur014226(gammaCop)
GO:0005771	multivesicular body	3	20	0.714508	1	Sfur003765(--);Sfur003819(Cd63);Sfur010052(chmp2b)
GO:0032391	photoreceptor connecting cilium	3	20	0.714508	1	Sfur002323(Mak);Sfur008404(WHRN);Sfur009115(Ift140)
GO:0048471	perinuclear region of cytoplasm	43	261	0.726989	1	Sfur000238(CHERP);Sfur000269(alphaTub84B);Sfur000302(Hsp90b1);Sfur000392(Hsp90b1);Sfur000874(USP2);Sfur001363(MTMR2);Sfur001906(ARFGEF1);Sfur002272(alphaTub84B);Sfur002558(Pdi);Sfur002696(alphaTub84B);Sfur002827(ubxn-1);Sfur003408(Mad2l1);Sfur003650(DNM1L);Sfur003690(--);Sfur003765(--);Sfur004647(PPIB);Sfur004764(RANGAP1);Sfur005101(CDK5RAP2);Sfur005107(--);Sfur005167(KIF20B);Sfur006167(--);Sfur0…
GO:1990391	DNA repair complex	4	27	0.730032	1	Sfur010285(POLE3);Sfur011216(Pole);Sfur014618(KDM1A);Sfur015216(MSH2)
GO:0098589	membrane region	99	588	0.734258	1	MSTRG.3233(SI);MSTRG.36634(IHH);Sfur000082(stan);Sfur000224(NLGN4Y);Sfur000490(--);Sfur000982(l(2)gl);Sfur001001(SCARB1);Sfur001004(atp6v0a1);Sfur001025(wat);Sfur001562(KLK13);Sfur001591(SLC9C1);Sfur001637(--);Sfur001652(alpha-Spec);Sfur001804(TEKT3);Sfur001806(Slc16a10);Sfur001898(Gabbr1);Sfur001969(GRIK2);Sfur002072(Ppt1);Sfur002128(Lar);Sfur002158(dnm1l);Sfur002336(ft);Sfur002358(Slc5a12);Sfur…
GO:0000109	nucleotide-excision repair complex	2	14	0.738344	1	Sfur010285(POLE3);Sfur011216(Pole)
GO:0005796	Golgi lumen	2	14	0.738344	1	Sfur008550(Hspg2);Sfur013903(--)
GO:0005942	phosphatidylinositol 3-kinase complex	2	14	0.738344	1	Sfur001129(CISH);Sfur008761(SOCS5)
GO:0032433	filopodium tip	2	14	0.738344	1	Sfur001926(hum-6);Sfur004335(MYO3A)
GO:0098839	postsynaptic density membrane	2	14	0.738344	1	Sfur000224(NLGN4Y);Sfur007718(Dagla)
GO:0045179	apical cortex	5	34	0.744635	1	Sfur001313(Insc);Sfur003469(--);Sfur003997(Ser);Sfur006377(Dlish);Sfur010114(sqh)
GO:0005671	Ada2/Gcn5/Ada3 transcription activator complex	1	7	0.744701	1	Sfur010285(POLE3)
GO:0016235	aggresome	1	7	0.744701	1	Sfur004764(RANGAP1)
GO:0016342	catenin complex	1	7	0.744701	1	Sfur013669(Cdh23)
GO:0030669	clathrin-coated endocytic vesicle membrane	1	7	0.744701	1	Sfur004248(AP2M1)
GO:0031045	dense core granule	1	7	0.744701	1	Sfur005534(--)
GO:0033017	sarcoplasmic reticulum membrane	1	7	0.744701	1	Sfur000238(CHERP)
GO:0033647	host intracellular organelle	1	7	0.744701	1	Sfur006423(PI4KA)
GO:0033648	host intracellular membrane-bounded organelle	1	7	0.744701	1	Sfur006423(PI4KA)
GO:0036156	inner dynein arm	1	7	0.744701	1	Sfur001301(Dnah1)
GO:0042788	polysomal ribosome	1	7	0.744701	1	Sfur003002(mle)
GO:0044615	nuclear pore nuclear basket	1	7	0.744701	1	Sfur003408(Mad2l1)
GO:0070775	H3 histone acetyltransferase complex	1	7	0.744701	1	Sfur000997(Phf14)
GO:0072487	MSL complex	1	7	0.744701	1	Sfur014205(MSL2)
GO:0072546	ER membrane protein complex	1	7	0.744701	1	Sfur014148(EMC1)
GO:0005703	polytene chromosome puff	3	21	0.746124	1	Sfur001144(Hrb87F);Sfur003759(Ssrp);Sfur011719(cnc)
GO:0030990	intraciliary transport particle	4	28	0.7568	1	Sfur001170(IFT27);Sfur002318(Ift172);Sfur009115(Ift140);Sfur011133(Traf3ip1)
GO:0031985	Golgi cisterna	8	54	0.764359	1	Sfur001835(FucTA);Sfur006715(CHSY1);Sfur006992(TMED2);Sfur008317(Golga2);Sfur009795(B3GALT6);Sfur011292(TMED2);Sfur012470(uxs1);Sfur014714(FucTA)
GO:0042734	presynaptic membrane	8	54	0.764359	1	Sfur000982(l(2)gl);Sfur001898(Gabbr1);Sfur001969(GRIK2);Sfur002443(znrf2);Sfur003132(DAT);Sfur003329(--);Sfur003666(unc-64);Sfur010346(otof)
GO:0000791	euchromatin	2	15	0.773194	1	Sfur000803(uhrf1);Sfur006908(Bap60)
GO:0090543	Flemming body	2	15	0.773194	1	Sfur003040(Kif23);Sfur011472(-)
GO:0046540	U4/U6 x U5 tri-snRNP complex	3	22	0.774874	1	Sfur000443(SmD2);Sfur005516(LSM6);Sfur014004(LSM3)
GO:0030424	axon	51	314	0.777705	1	MSTRG.32397(Hspa2);Sfur000619(Dhc64C);Sfur001363(MTMR2);Sfur001898(Gabbr1);Sfur001969(GRIK2);Sfur002072(Ppt1);Sfur002128(Lar);Sfur002163(bdl);Sfur002672(Lrp2);Sfur002888(Slc8a1);Sfur003182(SOD1);Sfur003329(--);Sfur003582(Ect4);Sfur003666(unc-64);Sfur003997(Ser);Sfur004373(Iqgap1);Sfur004764(RANGAP1);Sfur004822(tdc-1);Sfur005048(KIF3A);Sfur005188(--);Sfur005332(Nrg);Sfur005596(Ank3);Sfur006059(SLC…
GO:0000794	condensed nuclear chromosome	6	42	0.778927	1	Sfur000038(BUB1);Sfur012861(Cenpe);Sfur013570(Ncapd3);Sfur013892(rad50);Sfur014246(NCAPD2);Sfur015321(--)
GO:0005795	Golgi stack	12	80	0.780428	1	Sfur001835(FucTA);Sfur001931(Pgant7);Sfur002923(Pgant2);Sfur006715(CHSY1);Sfur006992(TMED2);Sfur008317(Golga2);Sfur008433(CLN3);Sfur009795(B3GALT6);Sfur011292(TMED2);Sfur012470(uxs1);Sfur012958(Pgant3);Sfur014714(FucTA)
GO:0034399	nuclear periphery	8	55	0.782376	1	Sfur000070(pola1);Sfur001080(Ppig);Sfur001100(--);Sfur001474(Anapc4);Sfur001906(ARFGEF1);Sfur003933(PSMA6);Sfur004627(Stag1);Sfur011189(kif4)
GO:0000118	histone deacetylase complex	5	36	0.789656	1	Sfur000243(Tbl1x);Sfur004083(Morf4l1);Sfur004267(Morf4l1);Sfur009742(Sall3);Sfur012262(JMJD1C)
GO:0000786	nucleosome	1	8	0.78996	1	Sfur005278(H2AZ2)
GO:0000930	gamma-tubulin complex	1	8	0.78996	1	Sfur004421(Mzt1)
GO:0005640	nuclear outer membrane	1	8	0.78996	1	Sfur014738(--)
GO:0005719	nuclear euchromatin	1	8	0.78996	1	Sfur006908(Bap60)
GO:0005767	secondary lysosome	1	8	0.78996	1	Sfur008433(CLN3)
GO:0005859	muscle myosin complex	1	8	0.78996	1	Sfur010033(fln)
GO:0031091	platelet alpha granule	1	8	0.78996	1	Sfur008501(SCCPDH)
GO:0031209	SCAR complex	1	8	0.78996	1	Sfur005383(--)
GO:0034992	microtubule organizing center attachment site	1	8	0.78996	1	Sfur014738(--)
GO:0034993	LINC complex	1	8	0.78996	1	Sfur014738(--)
GO:0035003	subapical complex	1	8	0.78996	1	Sfur004483(lft)
GO:0070820	tertiary granule	1	8	0.78996	1	Sfur012400(GGH)
GO:0005694	chromosome	125	749	0.792213	1	MSTRG.3655(--);MSTRG.36572(smc1a);MSTRG.7293(--);Sfur000038(BUB1);Sfur000070(pola1);Sfur000071(Mcm7);Sfur000095(polo);Sfur000145(Mcm7);Sfur000171(--);Sfur000619(Dhc64C);Sfur000803(uhrf1);Sfur001100(--);Sfur001142(Esco2);Sfur001144(Hrb87F);Sfur001206(Timeless);Sfur001323(SOX5);Sfur001478(REPTOR-BP);Sfur001686(Kr);Sfur001825(--);Sfur001869(Act5C);Sfur002054(kni);Sfur002175(pip);Sfur002315(dpa);Sfur…
GO:0030139	endocytic vesicle	15	100	0.799218	1	Sfur001004(atp6v0a1);Sfur001151(PDIA3);Sfur002672(Lrp2);Sfur003517(--);Sfur004248(AP2M1);Sfur004876(ptc);Sfur005921(spri);Sfur006233(ATP7A);Sfur006287(spri);Sfur006482(spri);Sfur006496(--);Sfur007288(LRP1);Sfur007825(RAB11FIP5);Sfur009600(VAV3);Sfur009680(VAV3)
GO:0005794	Golgi apparatus	117	704	0.799776	1	MSTRG.23723(lva);Sfur000111(Arsb);Sfur000112(ZMYND8);Sfur000597(A4galt);Sfur000619(Dhc64C);Sfur000770(TMEM165);Sfur000808(PLD3);Sfur000838(SLC26A11);Sfur000982(l(2)gl);Sfur001043(KdelR);Sfur001142(Esco2);Sfur001170(IFT27);Sfur001250(calub);Sfur001531(COPB1);Sfur001638(Ttpa);Sfur001652(alpha-Spec);Sfur001835(FucTA);Sfur001906(ARFGEF1);Sfur001931(Pgant7);Sfur002072(Ppt1);Sfur002158(dnm1l);Sfur00217…
GO:0005844	polysome	3	23	0.800894	1	Sfur003002(mle);Sfur003200(GCN1);Sfur003933(PSMA6)
GO:0035327	transcriptionally active chromatin	2	16	0.803916	1	Sfur014771(Rbp1);Sfur015414(B52)
GO:0044454	nuclear chromosome part	61	378	0.812233	1	MSTRG.7293(--);Sfur000038(BUB1);Sfur000070(pola1);Sfur000071(Mcm7);Sfur000145(Mcm7);Sfur000171(--);Sfur000803(uhrf1);Sfur001142(Esco2);Sfur001206(Timeless);Sfur001323(SOX5);Sfur001686(Kr);Sfur001869(Act5C);Sfur002054(kni);Sfur002315(dpa);Sfur002398(ZFHX4);Sfur002833(eg);Sfur003002(mle);Sfur003077(DCLRE1A);Sfur004083(Morf4l1);Sfur004267(Morf4l1);Sfur004856(CBX1);Sfur005278(H2AZ2);Sfur005283(JUN);S…
GO:1902554	serine/threonine protein kinase complex	6	44	0.816329	1	Sfur001156(--);Sfur001932(cdk14);Sfur005415(CycE);Sfur005841(RB1CC1);Sfur008091(RB1CC1);Sfur009613(Pka-C3)
GO:0031984	organelle subcompartment	31	200	0.821327	1	Sfur000770(TMEM165);Sfur001638(Ttpa);Sfur001835(FucTA);Sfur001906(ARFGEF1);Sfur001931(Pgant7);Sfur002923(Pgant2);Sfur003112(brun);Sfur003765(--);Sfur006233(ATP7A);Sfur006715(CHSY1);Sfur006724(Pcsk1);Sfur006992(TMED2);Sfur007556(RAB29);Sfur008300(Coro7);Sfur008317(Golga2);Sfur008433(CLN3);Sfur008554(ARL5B);Sfur008831(CLVS1);Sfur008908(Tgfbi);Sfur009204(--);Sfur009218(--);Sfur009795(B3GALT6);Sfur01…
GO:0030670	phagocytic vesicle membrane	3	24	0.824341	1	Sfur001004(atp6v0a1);Sfur006233(ATP7A);Sfur007825(RAB11FIP5)
GO:0000228	nuclear chromosome	65	404	0.826526	1	MSTRG.36572(smc1a);MSTRG.7293(--);Sfur000038(BUB1);Sfur000070(pola1);Sfur000071(Mcm7);Sfur000145(Mcm7);Sfur000171(--);Sfur000803(uhrf1);Sfur001142(Esco2);Sfur001206(Timeless);Sfur001323(SOX5);Sfur001686(Kr);Sfur001869(Act5C);Sfur002054(kni);Sfur002315(dpa);Sfur002398(ZFHX4);Sfur002833(eg);Sfur003002(mle);Sfur003077(DCLRE1A);Sfur004083(Morf4l1);Sfur004267(Morf4l1);Sfur004856(CBX1);Sfur005178(SMC2)…
GO:0005744	mitochondrial inner membrane presequence translocase complex	1	9	0.8272	1	Sfur004996(to)
GO:0030014	CCR4-NOT complex	1	9	0.8272	1	Sfur005015(Cnot11)
GO:0030131	clathrin adaptor complex	1	9	0.8272	1	Sfur004248(AP2M1)
GO:0030897	HOPS complex	1	9	0.8272	1	Sfur010881(--)
GO:0031307	integral component of mitochondrial outer membrane	1	9	0.8272	1	Sfur014302(ABCB6)
GO:0034719	SMN-Sm protein complex	1	9	0.8272	1	Sfur000549(STRAP)
GO:0038039	G-protein coupled receptor heterodimeric complex	1	9	0.8272	1	Sfur001898(Gabbr1)
GO:0044423	virion part	1	9	0.8272	1	Sfur011543(--)
GO:0061174	type I terminal bouton	1	9	0.8272	1	Sfur012489(Abp1)
GO:1902710	GABA receptor complex	1	9	0.8272	1	Sfur001898(Gabbr1)
GO:0005680	anaphase-promoting complex	2	17	0.830879	1	Sfur001474(Anapc4);Sfur006367(ANAPC1)
GO:0031010	ISWI-type complex	2	17	0.830879	1	Sfur010285(POLE3);Sfur012812(RSF1)
GO:0031225	anchored component of membrane	10	71	0.831162	1	Sfur000490(--);Sfur001024(ALPL);Sfur001496(ZFAND2B);Sfur003462(CPM);Sfur004921(--);Sfur007575(Cont);Sfur008676(Mipp1);Sfur009812(--);Sfur011648(Lac);Sfur011825(vanin-like)
GO:0043197	dendritic spine	6	45	0.833064	1	Sfur000112(ZMYND8);Sfur001898(Gabbr1);Sfur002079(PPP1R9A);Sfur002888(Slc8a1);Sfur009577(Shank3);Sfur014883(PPFIA1)
GO:0009897	external side of plasma membrane	9	65	0.837201	1	Sfur000490(--);Sfur002197(ABCG1);Sfur002394(Ano4);Sfur002672(Lrp2);Sfur002977(Abcg1);Sfur003765(--);Sfur008260(Slc7a5);Sfur008676(Mipp1);Sfur015067(Toll-7)
GO:0030054	cell junction	53	335	0.840855	1	MSTRG.17552(C5);MSTRG.2266(--);MSTRG.32397(Hspa2);MSTRG.34003(Hsc70-3);MSTRG.34004(Hsc70-3);Sfur000082(stan);Sfur000490(--);Sfur000970(zip);Sfur000982(l(2)gl);Sfur001142(Esco2);Sfur001151(PDIA3);Sfur001236(Sym);Sfur001562(KLK13);Sfur002128(Lar);Sfur002456(ccdc85c);Sfur002888(Slc8a1);Sfur003710(DDB_G0271356);Sfur003731(PXN);Sfur004295(--);Sfur004373(Iqgap1);Sfur004463(Pdzd2);Sfur004483(lft);Sfur00…
GO:0048786	presynaptic active zone	5	39	0.84525	1	Sfur003329(--);Sfur003666(unc-64);Sfur006059(SLC17A7);Sfur010346(otof);Sfur014883(PPFIA1)
GO:0097526	spliceosomal tri-snRNP complex	3	25	0.845385	1	Sfur000443(SmD2);Sfur005516(LSM6);Sfur014004(LSM3)
GO:0044420	extracellular matrix component	6	46	0.848553	1	Sfur004229(Eppin);Sfur006971(Agrn);Sfur008550(Hspg2);Sfur009218(--);Sfur010462(LanB2);Sfur015102(Hmcn1)
GO:1902911	protein kinase complex	6	46	0.848553	1	Sfur001156(--);Sfur001932(cdk14);Sfur005415(CycE);Sfur005841(RB1CC1);Sfur008091(RB1CC1);Sfur009613(Pka-C3)
GO:0005669	transcription factor TFIID complex	2	18	0.854448	1	Sfur003528(Taf2);Sfur003607(caz)
GO:0031463	Cul3-RING ubiquitin ligase complex	2	18	0.854448	1	Sfur011598(Pdcd6);Sfur015428(--)
GO:0000153	cytoplasmic ubiquitin ligase complex	1	10	0.857841	1	Sfur005057(DERL1)
GO:0000812	Swr1 complex	1	10	0.857841	1	Sfur010534(ACTR6)
GO:0005705	polytene chromosome interband	1	10	0.857841	1	Sfur003759(Ssrp)
GO:0031306	intrinsic component of mitochondrial outer membrane	1	10	0.857841	1	Sfur014302(ABCB6)
GO:0032590	dendrite membrane	1	10	0.857841	1	Sfur007718(Dagla)
GO:0035371	microtubule plus-end	1	10	0.857841	1	Sfur005101(CDK5RAP2)
GO:0101002	ficolin-1-rich granule	1	10	0.857841	1	Sfur005445(PRDX4)
GO:1904813	ficolin-1-rich granule lumen	1	10	0.857841	1	Sfur005445(PRDX4)
GO:0005604	basement membrane	5	40	0.86085	1	Sfur006971(Agrn);Sfur008550(Hspg2);Sfur009218(--);Sfur010462(LanB2);Sfur015102(Hmcn1)
GO:0098590	plasma membrane region	83	519	0.868724	1	Sfur000082(stan);Sfur000224(NLGN4Y);Sfur000490(--);Sfur000982(l(2)gl);Sfur001001(SCARB1);Sfur001004(atp6v0a1);Sfur001025(wat);Sfur001562(KLK13);Sfur001591(SLC9C1);Sfur001637(--);Sfur001652(alpha-Spec);Sfur001806(Slc16a10);Sfur001898(Gabbr1);Sfur001969(GRIK2);Sfur002128(Lar);Sfur002336(ft);Sfur002358(Slc5a12);Sfur002394(Ano4);Sfur002443(znrf2);Sfur002672(Lrp2);Sfur002888(Slc8a1);Sfur002901(ft);Sfu…
GO:0005769	early endosome	22	151	0.871957	1	Sfur000565(SNX4);Sfur000770(TMEM165);Sfur000808(PLD3);Sfur001363(MTMR2);Sfur001638(Ttpa);Sfur003580(MARCHF8);Sfur005057(DERL1);Sfur005461(Ldlr);Sfur007288(LRP1);Sfur007556(RAB29);Sfur007718(Dagla);Sfur008433(CLN3);Sfur008831(CLVS1);Sfur008921(Rcc2);Sfur009204(--);Sfur009969(--);Sfur010080(Nae1);Sfur011723(Atp11a);Sfur012084(Atp11a);Sfur012938(Ldlrap1);Sfur013642(ATP6V0D1);Sfur014832(Lipg)
GO:0043209	myelin sheath	2	19	0.87498	1	Sfur004656(Ppia);Sfur013176(Cox6a1)
GO:0031902	late endosome membrane	10	75	0.877674	1	Sfur000492(Vps13);Sfur000770(TMEM165);Sfur000808(PLD3);Sfur003819(Cd63);Sfur008572(path);Sfur009189(ATG9A);Sfur009969(--);Sfur010052(chmp2b);Sfur010066(path);Sfur010342(path)
GO:0098562	cytoplasmic side of membrane	10	75	0.877674	1	Sfur000167(STAC2);Sfur002202(Src64B);Sfur002371(Gem);Sfur002767(Src64B);Sfur004373(Iqgap1);Sfur004484(Hm13);Sfur007922(TEK);Sfur009577(Shank3);Sfur009969(--);Sfur012938(Ldlrap1)
GO:0044440	endosomal part	32	214	0.878755	1	Sfur000079(RRAGA);Sfur000492(Vps13);Sfur000565(SNX4);Sfur000770(TMEM165);Sfur000808(PLD3);Sfur001004(atp6v0a1);Sfur001151(PDIA3);Sfur001363(MTMR2);Sfur001638(Ttpa);Sfur002443(znrf2);Sfur002672(Lrp2);Sfur003112(brun);Sfur003580(MARCHF8);Sfur003657(--);Sfur003819(Cd63);Sfur007718(Dagla);Sfur008433(CLN3);Sfur008572(path);Sfur008831(CLVS1);Sfur008921(Rcc2);Sfur009189(ATG9A);Sfur009204(--);Sfur009969(…
GO:0019012	virion	1	11	0.883051	1	Sfur011543(--)
GO:0030991	intraciliary transport particle A	1	11	0.883051	1	Sfur009115(Ift140)
GO:0044322	endoplasmic reticulum quality control compartment	1	11	0.883051	1	Sfur011425(--)
GO:1990752	microtubule end	1	11	0.883051	1	Sfur005101(CDK5RAP2)
GO:0009898	cytoplasmic side of plasma membrane	9	69	0.884072	1	Sfur000167(STAC2);Sfur002202(Src64B);Sfur002371(Gem);Sfur002767(Src64B);Sfur004373(Iqgap1);Sfur007922(TEK);Sfur009577(Shank3);Sfur009969(--);Sfur012938(Ldlrap1)
GO:0005776	autophagosome	5	42	0.888106	1	Sfur003664(Pex23);Sfur008433(CLN3);Sfur009189(ATG9A);Sfur010881(--);Sfur013517(ATG16L1)
GO:0031594	neuromuscular junction	7	56	0.889331	1	Sfur001652(alpha-Spec);Sfur002079(PPP1R9A);Sfur003266(Akap1);Sfur005596(Ank3);Sfur007483(--);Sfur008908(Tgfbi);Sfur012489(Abp1)
GO:0000307	cyclin-dependent protein kinase holoenzyme complex	2	20	0.892811	1	Sfur001932(cdk14);Sfur005415(CycE)
GO:0044309	neuron spine	6	50	0.899157	1	Sfur000112(ZMYND8);Sfur001898(Gabbr1);Sfur002079(PPP1R9A);Sfur002888(Slc8a1);Sfur009577(Shank3);Sfur014883(PPFIA1)
GO:0016607	nuclear speck	25	174	0.900157	1	Sfur000672(SRSF2);Sfur001080(Ppig);Sfur001144(Hrb87F);Sfur002834(PPIH);Sfur003749(rnps1-b);Sfur004029(ppp1cc-a);Sfur004083(Morf4l1);Sfur004157(ppp1cc-a);Sfur004267(Morf4l1);Sfur004691(UBE2R2);Sfur005717(thoc6);Sfur006678(AKAP17A);Sfur006704(ascc3);Sfur007421(Rreb1);Sfur008520(Rsf1);Sfur010406(SERPINB13);Sfur010768(snRNP-U1-70K);Sfur011211(POLI);Sfur011765(ZNF106);Sfur012020(NRDE2);Sfur014771(Rbp1…
GO:0005581	collagen trimer	1	12	0.903793	1	Sfur004229(Eppin)
GO:0005666	DNA-directed RNA polymerase III complex	1	12	0.903793	1	Sfur000753(POLR3F)
GO:0005682	U5 snRNP	1	12	0.903793	1	Sfur000443(SmD2)
GO:0030125	clathrin vesicle coat	1	12	0.903793	1	Sfur004248(AP2M1)
GO:0042581	specific granule	1	12	0.903793	1	Sfur012400(GGH)
GO:0090568	nuclear transcriptional repressor complex	1	12	0.903793	1	Sfur009742(Sall3)
GO:0097542	ciliary tip	1	12	0.903793	1	Sfur002323(Mak)
GO:0097546	ciliary base	1	12	0.903793	1	Sfur014779(MOK)
GO:0098552	side of membrane	20	143	0.904132	1	Sfur000167(STAC2);Sfur000490(--);Sfur002197(ABCG1);Sfur002202(Src64B);Sfur002371(Gem);Sfur002394(Ano4);Sfur002672(Lrp2);Sfur002767(Src64B);Sfur002977(Abcg1);Sfur003765(--);Sfur004373(Iqgap1);Sfur004484(Hm13);Sfur006093(HSD11B2);Sfur007922(TEK);Sfur008260(Slc7a5);Sfur008676(Mipp1);Sfur009577(Shank3);Sfur009969(--);Sfur012938(Ldlrap1);Sfur015067(Toll-7)
GO:0008328	ionotropic glutamate receptor complex	3	29	0.909076	1	Sfur001969(GRIK2);Sfur003099(grin2b);Sfur014188(por)
GO:0032588	trans-Golgi network membrane	3	29	0.909076	1	Sfur000770(TMEM165);Sfur001638(Ttpa);Sfur008831(CLVS1)
GO:0019897	extrinsic component of plasma membrane	7	58	0.909216	1	Sfur000167(STAC2);Sfur002202(Src64B);Sfur002767(Src64B);Sfur004373(Iqgap1);Sfur007922(TEK);Sfur009577(Shank3);Sfur013669(Cdh23)
GO:0031253	cell projection membrane	18	131	0.909277	1	Sfur001004(atp6v0a1);Sfur001591(SLC9C1);Sfur001898(Gabbr1);Sfur002672(Lrp2);Sfur003997(Ser);Sfur004713(PLB1);Sfur005382(PKD2);Sfur005568(PLB1);Sfur006233(ATP7A);Sfur006538(Ca9);Sfur007535(SLC26A2);Sfur007578(Slc27a4);Sfur007718(Dagla);Sfur008260(Slc7a5);Sfur008404(WHRN);Sfur009374(CNGB1);Sfur009577(Shank3);Sfur011683(MFSD10)
GO:0030136	clathrin-coated vesicle	10	79	0.9132	1	Sfur000035(csbC);Sfur001638(Ttpa);Sfur003765(--);Sfur004248(AP2M1);Sfur006233(ATP7A);Sfur007288(LRP1);Sfur008831(CLVS1);Sfur009204(--);Sfur010615(Scyl2);Sfur014303(SLC18A2)
GO:0008023	transcription elongation factor complex	4	37	0.914043	1	MSTRG.32291(Nelf-E);Sfur003759(Ssrp);Sfur006826(CG40228);Sfur014346(gus)
GO:0022626	cytosolic ribosome	6	52	0.918498	1	Sfur003690(--);Sfur012506(APOD);Sfur012609(--);Sfur013683(APOD);Sfur013954(APOD);Sfur014182(APOD)
GO:0043073	germ cell nucleus	1	13	0.920858	1	Sfur008806(XNP)
GO:0071004	U2-type prespliceosome	1	13	0.920858	1	Sfur010768(snRNP-U1-70K)
GO:0071010	prespliceosome	1	13	0.920858	1	Sfur010768(snRNP-U1-70K)
GO:0005700	polytene chromosome	11	87	0.922221	1	Sfur001144(Hrb87F);Sfur003759(Ssrp);Sfur008806(XNP);Sfur010077(asf1);Sfur011719(cnc);Sfur011934(bab2);Sfur012574(Skeletor);Sfur013315(Skeletor);Sfur014542(osa);Sfur014709(brm);Sfur015414(B52)
GO:0000152	nuclear ubiquitin ligase complex	3	31	0.931019	1	MSTRG.7293(--);Sfur001474(Anapc4);Sfur006367(ANAPC1)
GO:0019005	SCF ubiquitin ligase complex	3	31	0.931019	1	Sfur000380(--);Sfur011621(Fbxl7);Sfur014346(gus)
GO:0097346	INO80-type complex	2	23	0.933084	1	Sfur001869(Act5C);Sfur010534(ACTR6)
GO:0005732	small nucleolar ribonucleoprotein complex	1	14	0.934897	1	Sfur005516(LSM6)
GO:0005766	primary lysosome	1	14	0.934897	1	Sfur012400(GGH)
GO:0017146	NMDA selective glutamate receptor complex	1	14	0.934897	1	Sfur003099(grin2b)
GO:0031011	Ino80 complex	1	14	0.934897	1	Sfur001869(Act5C)
GO:0035098	ESC/E(Z) complex	1	14	0.934897	1	Sfur007688(eed)
GO:0042582	azurophil granule	1	14	0.934897	1	Sfur012400(GGH)
GO:0045334	clathrin-coated endocytic vesicle	1	14	0.934897	1	Sfur004248(AP2M1)
GO:0048188	Set1C/COMPASS complex	1	14	0.934897	1	Sfur007793(Hcfc1)
GO:0036477	somatodendritic compartment	58	387	0.93609	1	Sfur000112(ZMYND8);Sfur001318(rg);Sfur001541(rg);Sfur001562(KLK13);Sfur001588(rg);Sfur001608(rg);Sfur001898(Gabbr1);Sfur001969(GRIK2);Sfur002072(Ppt1);Sfur002079(PPP1R9A);Sfur002558(Pdi);Sfur002672(Lrp2);Sfur002888(Slc8a1);Sfur003132(DAT);Sfur003182(SOD1);Sfur003582(Ect4);Sfur003690(--);Sfur004151(DCX-EMAP);Sfur004232(DCX-EMAP);Sfur004764(RANGAP1);Sfur004822(tdc-1);Sfur005332(Nrg);Sfur005383(--);…
GO:0000932	cytoplasmic mRNA processing body	5	47	0.936977	1	Sfur002739(--);Sfur003933(PSMA6);Sfur005516(LSM6);Sfur014004(LSM3);Sfur014738(--)
GO:0042995	cell projection	181	1122	0.937412	1	MSTRG.14692(MMP14);MSTRG.21722(ck);MSTRG.22592(RAPH1);MSTRG.23721(ADCY9);MSTRG.32397(Hspa2);MSTRG.36634(IHH);MSTRG.7349(Rheb);Sfur000112(ZMYND8);Sfur000294(EFHC2);Sfur000345(--);Sfur000363(cfap300);Sfur000405(Ptbp1);Sfur000490(--);Sfur000560(Tekt4);Sfur000619(Dhc64C);Sfur000702(Svopl);Sfur000736(--);Sfur000792(CFAP52);Sfur000804(--);Sfur000821(DCXR);Sfur000970(zip);Sfur001004(atp6v0a1);Sfur001156…
GO:0005768	endosome	65	431	0.939442	1	Sfur000079(RRAGA);Sfur000492(Vps13);Sfur000565(SNX4);Sfur000770(TMEM165);Sfur000808(PLD3);Sfur001004(atp6v0a1);Sfur001151(PDIA3);Sfur001305(gol);Sfur001363(MTMR2);Sfur001638(Ttpa);Sfur002197(ABCG1);Sfur002443(znrf2);Sfur002672(Lrp2);Sfur002977(Abcg1);Sfur003099(grin2b);Sfur003112(brun);Sfur003580(MARCHF8);Sfur003657(--);Sfur003765(--);Sfur003819(Cd63);Sfur004759(MFSD12);Sfur005057(DERL1);Sfur0054…
GO:1990204	oxidoreductase complex	8	70	0.945126	1	Sfur000649(Gpdh);Sfur000898(T05H10.6);Sfur002817(Y94H6A.8);Sfur005404(Rrm1);Sfur008914(GPD2);Sfur013548(PDHB);Sfur014793(OGDH);Sfur015330(ogdh-1)
GO:0033178	proton-transporting two-sector ATPase complex, catalytic domain	1	15	0.946448	1	Sfur014686(Atp6v1e2)
GO:0030027	lamellipodium	6	56	0.947677	1	Sfur001371(MYLK);Sfur002079(PPP1R9A);Sfur003731(PXN);Sfur005383(--);Sfur012489(Abp1);Sfur013136(PTPN13)
GO:0030665	clathrin-coated vesicle membrane	3	33	0.94799	1	Sfur000035(csbC);Sfur004248(AP2M1);Sfur014303(SLC18A2)
GO:0030425	dendrite	39	274	0.949719	1	Sfur000112(ZMYND8);Sfur001898(Gabbr1);Sfur001969(GRIK2);Sfur002072(Ppt1);Sfur002079(PPP1R9A);Sfur002672(Lrp2);Sfur002888(Slc8a1);Sfur003182(SOD1);Sfur003582(Ect4);Sfur003690(--);Sfur004151(DCX-EMAP);Sfur004232(DCX-EMAP);Sfur004764(RANGAP1);Sfur005332(Nrg);Sfur005383(--);Sfur005596(Ank3);Sfur006724(Pcsk1);Sfur007288(LRP1);Sfur007797(BMPR2);Sfur008404(WHRN);Sfur008504(Pka-C1);Sfur008572(path);Sfur0…
GO:0005912	adherens junction	24	179	0.951768	1	MSTRG.32397(Hspa2);MSTRG.34003(Hsc70-3);MSTRG.34004(Hsc70-3);Sfur001151(PDIA3);Sfur002128(Lar);Sfur002456(ccdc85c);Sfur003710(DDB_G0271356);Sfur003731(PXN);Sfur004295(--);Sfur004373(Iqgap1);Sfur005383(--);Sfur006167(--);Sfur006423(PI4KA);Sfur006939(F42H10.3);Sfur007288(LRP1);Sfur007797(BMPR2);Sfur008028(TBCD);Sfur008802(NPHS1);Sfur009553(BCAR3);Sfur010240(Wnk3);Sfur010439(Shroom2);Sfur012055(KIRR…
GO:0044431	Golgi apparatus part	66	443	0.953424	1	Sfur000597(A4galt);Sfur000770(TMEM165);Sfur000808(PLD3);Sfur000982(l(2)gl);Sfur001170(IFT27);Sfur001531(COPB1);Sfur001638(Ttpa);Sfur001835(FucTA);Sfur001906(ARFGEF1);Sfur001931(Pgant7);Sfur002175(pip);Sfur002197(ABCG1);Sfur002923(Pgant2);Sfur002977(Abcg1);Sfur003112(brun);Sfur003765(--);Sfur004693(COPE);Sfur004863(SEC24C);Sfur005716(PAQR3);Sfur006233(ATP7A);Sfur006423(PI4KA);Sfur006715(CHSY1);Sfu…
GO:0005643	nuclear pore	4	42	0.954672	1	Sfur001100(--);Sfur003408(Mad2l1);Sfur004764(RANGAP1);Sfur015099(--)
GO:0033202	DNA helicase complex	1	16	0.95595	1	Sfur001869(Act5C)
GO:0099738	cell cortex region	5	50	0.956125	1	Sfur001313(Insc);Sfur003469(--);Sfur003997(Ser);Sfur006377(Dlish);Sfur010114(sqh)
GO:0035770	ribonucleoprotein granule	15	121	0.956959	1	Sfur000483(PKLR);Sfur002739(--);Sfur003002(mle);Sfur003933(PSMA6);Sfur004373(Iqgap1);Sfur005516(LSM6);Sfur006256(SYMPK);Sfur006594(Ythdc2);Sfur007561(ASZ1);Sfur008511(PyK);Sfur010797(Arntl);Sfur011211(POLI);Sfur012432(TDRD7);Sfur014004(LSM3);Sfur014738(--)
GO:0070161	anchoring junction	24	181	0.957987	1	MSTRG.32397(Hspa2);MSTRG.34003(Hsc70-3);MSTRG.34004(Hsc70-3);Sfur001151(PDIA3);Sfur002128(Lar);Sfur002456(ccdc85c);Sfur003710(DDB_G0271356);Sfur003731(PXN);Sfur004295(--);Sfur004373(Iqgap1);Sfur005383(--);Sfur006167(--);Sfur006423(PI4KA);Sfur006939(F42H10.3);Sfur007288(LRP1);Sfur007797(BMPR2);Sfur008028(TBCD);Sfur008802(NPHS1);Sfur009553(BCAR3);Sfur010240(Wnk3);Sfur010439(Shroom2);Sfur012055(KIRR…
GO:0000139	Golgi membrane	49	340	0.958043	1	Sfur000597(A4galt);Sfur000770(TMEM165);Sfur000808(PLD3);Sfur000982(l(2)gl);Sfur001170(IFT27);Sfur001531(COPB1);Sfur001638(Ttpa);Sfur001835(FucTA);Sfur001906(ARFGEF1);Sfur001931(Pgant7);Sfur002175(pip);Sfur002197(ABCG1);Sfur002923(Pgant2);Sfur002977(Abcg1);Sfur004693(COPE);Sfur004863(SEC24C);Sfur005716(PAQR3);Sfur006423(PI4KA);Sfur006715(CHSY1);Sfur006992(TMED2);Sfur007170(fj);Sfur007273(LMAN1);Sf…
GO:0032040	small-subunit processome	2	26	0.958726	1	Sfur004883(CG1789);Sfur006361(CG3527)
GO:0055038	recycling endosome membrane	2	26	0.958726	1	Sfur001151(PDIA3);Sfur012596(RAP2C)
GO:0055037	recycling endosome	12	101	0.958848	1	Sfur001151(PDIA3);Sfur002197(ABCG1);Sfur002977(Abcg1);Sfur005509(Nct);Sfur007483(--);Sfur007556(RAB29);Sfur007825(RAB11FIP5);Sfur008433(CLN3);Sfur011723(Atp11a);Sfur012084(Atp11a);Sfur012596(RAP2C);Sfur012938(Ldlrap1)
GO:0005635	nuclear envelope	24	182	0.960827	1	Sfur000070(pola1);Sfur000095(polo);Sfur000209(Uggt);Sfur001100(--);Sfur002558(Pdi);Sfur003408(Mad2l1);Sfur004764(RANGAP1);Sfur004945(AK9);Sfur005404(Rrm1);Sfur005841(RB1CC1);Sfur006235(Cse1);Sfur006325(Cse1);Sfur006841(PTGES);Sfur006915(Uggt);Sfur007483(--);Sfur008091(RB1CC1);Sfur009780(Smox);Sfur011683(MFSD10);Sfur012887(Dpy19l1);Sfur013467(Rif1);Sfur014127(Lpin1);Sfur014738(--);Sfur015099(--);S…
GO:0032589	neuron projection membrane	3	35	0.961003	1	Sfur001898(Gabbr1);Sfur003997(Ser);Sfur007718(Dagla)
GO:0031252	cell leading edge	19	150	0.963701	1	Sfur000804(--);Sfur000970(zip);Sfur000982(l(2)gl);Sfur001371(MYLK);Sfur001898(Gabbr1);Sfur001926(hum-6);Sfur002079(PPP1R9A);Sfur002128(Lar);Sfur003731(PXN);Sfur003997(Ser);Sfur004373(Iqgap1);Sfur005383(--);Sfur006233(ATP7A);Sfur007718(Dagla);Sfur008714(Kif18a);Sfur011207(DPP9);Sfur012489(Abp1);Sfur013136(PTPN13);Sfur014357(zip)
GO:0036452	ESCRT complex	1	17	0.963767	1	Sfur010052(chmp2b)
GO:0038037	G-protein coupled receptor dimeric complex	1	17	0.963767	1	Sfur001898(Gabbr1)
GO:0097648	G-protein coupled receptor complex	1	17	0.963767	1	Sfur001898(Gabbr1)
GO:0010008	endosome membrane	26	198	0.968062	1	Sfur000492(Vps13);Sfur000565(SNX4);Sfur000770(TMEM165);Sfur000808(PLD3);Sfur001004(atp6v0a1);Sfur001151(PDIA3);Sfur001363(MTMR2);Sfur001638(Ttpa);Sfur002443(znrf2);Sfur003580(MARCHF8);Sfur003657(--);Sfur003819(Cd63);Sfur007718(Dagla);Sfur008433(CLN3);Sfur008572(path);Sfur008831(CLVS1);Sfur008921(Rcc2);Sfur009189(ATG9A);Sfur009204(--);Sfur009969(--);Sfur010052(chmp2b);Sfur010066(path);Sfur010342(p…
GO:0000790	nuclear chromatin	39	282	0.968328	1	MSTRG.7293(--);Sfur000803(uhrf1);Sfur001142(Esco2);Sfur001206(Timeless);Sfur001323(SOX5);Sfur001686(Kr);Sfur001869(Act5C);Sfur002054(kni);Sfur002398(ZFHX4);Sfur002833(eg);Sfur003002(mle);Sfur004083(Morf4l1);Sfur004267(Morf4l1);Sfur004856(CBX1);Sfur005278(H2AZ2);Sfur005283(JUN);Sfur005293(sem-2);Sfur005323(Mef2);Sfur006238(NIPBL);Sfur006908(Bap60);Sfur007011(KLF2);Sfur007091(znf367);Sfur009744(--)…
GO:0030118	clathrin coat	1	18	0.970197	1	Sfur004248(AP2M1)
GO:0030119	AP-type membrane coat adaptor complex	1	18	0.970197	1	Sfur004248(AP2M1)
GO:0032039	integrator complex	1	18	0.970197	1	Sfur006238(NIPBL)
GO:0043083	synaptic cleft	1	18	0.970197	1	Sfur006971(Agrn)
GO:0031965	nuclear membrane	13	112	0.971588	1	Sfur001100(--);Sfur004764(RANGAP1);Sfur004945(AK9);Sfur005841(RB1CC1);Sfur007483(--);Sfur008091(RB1CC1);Sfur009780(Smox);Sfur011683(MFSD10);Sfur012887(Dpy19l1);Sfur013467(Rif1);Sfur014127(Lpin1);Sfur014738(--);Sfur015211(Zmpste24)
GO:0000785	chromatin	52	368	0.974344	1	MSTRG.7293(--);Sfur000803(uhrf1);Sfur001142(Esco2);Sfur001144(Hrb87F);Sfur001206(Timeless);Sfur001323(SOX5);Sfur001686(Kr);Sfur001869(Act5C);Sfur002054(kni);Sfur002398(ZFHX4);Sfur002833(eg);Sfur003002(mle);Sfur004083(Morf4l1);Sfur004267(Morf4l1);Sfur004627(Stag1);Sfur004856(CBX1);Sfur005278(H2AZ2);Sfur005283(JUN);Sfur005293(sem-2);Sfur005323(Mef2);Sfur005880(PCNA);Sfur006238(NIPBL);Sfur006908(Bap…
GO:0005689	U12-type spliceosomal complex	1	19	0.975487	1	Sfur006774(--)
GO:0008076	voltage-gated potassium channel complex	1	19	0.975487	1	Sfur009604(Dpp10)
GO:0016234	inclusion body	1	19	0.975487	1	Sfur004764(RANGAP1)
GO:0071007	U2-type catalytic step 2 spliceosome	1	19	0.975487	1	Sfur010216(Ppil1)
GO:1902555	endoribonuclease complex	1	19	0.975487	1	Sfur003002(mle)
GO:0045335	phagocytic vesicle	4	47	0.976892	1	Sfur001004(atp6v0a1);Sfur001151(PDIA3);Sfur006233(ATP7A);Sfur007825(RAB11FIP5)
GO:0061695	transferase complex, transferring phosphorus-containing groups	23	183	0.9776	1	Sfur000070(pola1);Sfur000753(POLR3F);Sfur001129(CISH);Sfur001156(--);Sfur001932(cdk14);Sfur003528(Taf2);Sfur003607(caz);Sfur005415(CycE);Sfur005841(RB1CC1);Sfur006238(NIPBL);Sfur008091(RB1CC1);Sfur008184(DNApol-delta);Sfur008486(DNApol-alpha60);Sfur008761(SOCS5);Sfur009613(Pka-C3);Sfur009691(DNApol-delta);Sfur010285(POLE3);Sfur010293(TfIIFalpha);Sfur010563(MED6);Sfur011216(Pole);Sfur012341(MED6);…
GO:0060076	excitatory synapse	10	94	0.979591	1	Sfur001969(GRIK2);Sfur002079(PPP1R9A);Sfur002888(Slc8a1);Sfur003756(slc17a8);Sfur004463(Pdzd2);Sfur005803(Pdzd2);Sfur006059(SLC17A7);Sfur007797(BMPR2);Sfur009577(Shank3);Sfur012489(Abp1)
GO:0034705	potassium channel complex	1	20	0.979838	1	Sfur009604(Dpp10)
GO:0071339	MLL1 complex	1	20	0.979838	1	Sfur007793(Hcfc1)
GO:0080008	Cul4-RING E3 ubiquitin ligase complex	1	20	0.979838	1	Sfur002344(l(2)dtl)
GO:0036464	cytoplasmic ribonucleoprotein granule	12	109	0.980707	1	Sfur000483(PKLR);Sfur002739(--);Sfur003002(mle);Sfur003933(PSMA6);Sfur004373(Iqgap1);Sfur005516(LSM6);Sfur007561(ASZ1);Sfur008511(PyK);Sfur010797(Arntl);Sfur011211(POLI);Sfur014004(LSM3);Sfur014738(--)
GO:0000123	histone acetyltransferase complex	8	80	0.981295	1	Sfur000927(Mrgbp);Sfur000997(Phf14);Sfur003025(ACTL6B);Sfur004083(Morf4l1);Sfur004267(Morf4l1);Sfur007793(Hcfc1);Sfur010285(POLE3);Sfur014205(MSL2)
GO:0030532	small nuclear ribonucleoprotein complex	5	57	0.98196	1	Sfur000443(SmD2);Sfur001906(ARFGEF1);Sfur005516(LSM6);Sfur010768(snRNP-U1-70K);Sfur014004(LSM3)
GO:0000784	nuclear chromosome, telomeric region	4	49	0.982494	1	Sfur003077(DCLRE1A);Sfur004856(CBX1);Sfur013892(rad50);Sfur014618(KDM1A)
GO:0005686	U2 snRNP	1	21	0.983418	1	Sfur000443(SmD2)
GO:0001650	fibrillar center	3	41	0.984026	1	Sfur007421(Rreb1);Sfur012397(CAMK4);Sfur013136(PTPN13)
GO:0030173	integral component of Golgi membrane	2	32	0.984729	1	Sfur002175(pip);Sfur015167(SLC35B1)
GO:0098793	presynapse	32	249	0.985832	1	Sfur000035(csbC);Sfur000224(NLGN4Y);Sfur000322(SLC2A7);Sfur000643(st);Sfur000702(Svopl);Sfur000982(l(2)gl);Sfur001898(Gabbr1);Sfur001969(GRIK2);Sfur002072(Ppt1);Sfur002158(dnm1l);Sfur002443(znrf2);Sfur003132(DAT);Sfur003329(--);Sfur003650(DNM1L);Sfur003666(unc-64);Sfur003756(slc17a8);Sfur003765(--);Sfur004681(Slc17a5);Sfur006059(SLC17A7);Sfur006631(Sv2b);Sfur006696(DMXL1);Sfur007281(Svop);Sfur008…
GO:0098803	respiratory chain complex	4	51	0.986793	1	Sfur002817(Y94H6A.8);Sfur005773(COX5A);Sfur013176(Cox6a1);Sfur014287(COX4I2)
GO:0044798	nuclear transcription factor complex	9	91	0.987324	1	Sfur000321(Gtf3c1);Sfur002619(--);Sfur002772(Clk);Sfur003528(Taf2);Sfur003607(caz);Sfur010293(TfIIFalpha);Sfur010563(MED6);Sfur012341(MED6);Sfur014137(MED14)
GO:0071944	cell periphery	340	2110	0.987567	1	MSTRG.17552(C5);MSTRG.21722(ck);MSTRG.2266(--);Sfur000035(csbC);Sfur000082(stan);Sfur000167(STAC2);Sfur000219(FLNA);Sfur000224(NLGN4Y);Sfur000302(Hsp90b1);Sfur000322(SLC2A7);Sfur000336(slc20a1-a);Sfur000392(Hsp90b1);Sfur000490(--);Sfur000565(SNX4);Sfur000619(Dhc64C);Sfur000626(Tmod1);Sfur000643(st);Sfur000653(Pxd);Sfur000791(Tret1);Sfur000804(--);Sfur000838(SLC26A11);Sfur000935(Trhde);Sfur000970(…
GO:0019898	extrinsic component of membrane	13	121	0.988003	1	Sfur000167(STAC2);Sfur000492(Vps13);Sfur001129(CISH);Sfur002202(Src64B);Sfur002767(Src64B);Sfur004373(Iqgap1);Sfur005841(RB1CC1);Sfur007922(TEK);Sfur008091(RB1CC1);Sfur008761(SOCS5);Sfur009577(Shank3);Sfur011825(vanin-like);Sfur013669(Cdh23)
GO:0032592	integral component of mitochondrial membrane	3	43	0.988234	1	Sfur004996(to);Sfur008638(Adck1);Sfur014302(ABCB6)
GO:0045211	postsynaptic membrane	12	114	0.988316	1	Sfur000224(NLGN4Y);Sfur001898(Gabbr1);Sfur001969(GRIK2);Sfur002888(Slc8a1);Sfur003099(grin2b);Sfur003266(Akap1);Sfur003310(ggr-1);Sfur005596(Ank3);Sfur007718(Dagla);Sfur012489(Abp1);Sfur014738(--);Sfur015324(-)
GO:0000502	proteasome complex	4	52	0.988546	1	Sfur001496(ZFAND2B);Sfur003933(PSMA6);Sfur005057(DERL1);Sfur009256(PSMA7)
GO:0031228	intrinsic component of Golgi membrane	2	34	0.98911	1	Sfur002175(pip);Sfur015167(SLC35B1)
GO:0097458	neuron part	130	868	0.989382	1	MSTRG.14692(MMP14);MSTRG.21722(ck);MSTRG.23721(ADCY9);MSTRG.32397(Hspa2);MSTRG.36634(IHH);MSTRG.7349(Rheb);Sfur000035(csbC);Sfur000112(ZMYND8);Sfur000224(NLGN4Y);Sfur000322(SLC2A7);Sfur000405(Ptbp1);Sfur000619(Dhc64C);Sfur000643(st);Sfur000702(Svopl);Sfur000982(l(2)gl);Sfur001318(rg);Sfur001333(tropG);Sfur001363(MTMR2);Sfur001541(rg);Sfur001562(KLK13);Sfur001588(rg);Sfur001608(rg);Sfur001898(Gabb…
GO:0014069	postsynaptic density	8	85	0.989484	1	Sfur001969(GRIK2);Sfur002079(PPP1R9A);Sfur002888(Slc8a1);Sfur004463(Pdzd2);Sfur005803(Pdzd2);Sfur007797(BMPR2);Sfur009577(Shank3);Sfur012489(Abp1)
GO:0031248	protein acetyltransferase complex	8	85	0.989484	1	Sfur000927(Mrgbp);Sfur000997(Phf14);Sfur003025(ACTL6B);Sfur004083(Morf4l1);Sfur004267(Morf4l1);Sfur007793(Hcfc1);Sfur010285(POLE3);Sfur014205(MSL2)
GO:0099572	postsynaptic specialization	8	85	0.989484	1	Sfur001969(GRIK2);Sfur002079(PPP1R9A);Sfur002888(Slc8a1);Sfur004463(Pdzd2);Sfur005803(Pdzd2);Sfur007797(BMPR2);Sfur009577(Shank3);Sfur012489(Abp1)
GO:1902493	acetyltransferase complex	8	85	0.989484	1	Sfur000927(Mrgbp);Sfur000997(Phf14);Sfur003025(ACTL6B);Sfur004083(Morf4l1);Sfur004267(Morf4l1);Sfur007793(Hcfc1);Sfur010285(POLE3);Sfur014205(MSL2)
GO:0001726	ruffle	3	44	0.989916	1	Sfur000804(--);Sfur004373(Iqgap1);Sfur008714(Kif18a)
GO:0098573	intrinsic component of mitochondrial membrane	3	44	0.989916	1	Sfur004996(to);Sfur008638(Adck1);Sfur014302(ABCB6)
GO:0005746	mitochondrial respiratory chain	4	53	0.990075	1	Sfur002817(Y94H6A.8);Sfur005773(COX5A);Sfur013176(Cox6a1);Sfur014287(COX4I2)
GO:0097525	spliceosomal snRNP complex	4	53	0.990075	1	Sfur000443(SmD2);Sfur005516(LSM6);Sfur010768(snRNP-U1-70K);Sfur014004(LSM3)
GO:0034708	methyltransferase complex	7	78	0.990464	1	Sfur003211(Trmt61a);Sfur005812(nito);Sfur007688(eed);Sfur007731(Kdm5a);Sfur007793(Hcfc1);Sfur008416(Flacc);Sfur009564(CLNS1A)
GO:0071005	U2-type precatalytic spliceosome	2	35	0.990813	1	Sfur005516(LSM6);Sfur014004(LSM3)
GO:0016605	PML body	3	45	0.991364	1	Sfur010101(sumo3l);Sfur010797(Arntl);Sfur014606(--)
GO:0044459	plasma membrane part	159	1050	0.991755	1	MSTRG.17552(C5);MSTRG.2266(--);Sfur000035(csbC);Sfur000082(stan);Sfur000167(STAC2);Sfur000224(NLGN4Y);Sfur000322(SLC2A7);Sfur000336(slc20a1-a);Sfur000490(--);Sfur000838(SLC26A11);Sfur000982(l(2)gl);Sfur001001(SCARB1);Sfur001004(atp6v0a1);Sfur001025(wat);Sfur001091(SPE);Sfur001376(--);Sfur001562(KLK13);Sfur001591(SLC9C1);Sfur001637(--);Sfur001652(alpha-Spec);Sfur001672(LHCGR);Sfur001806(Slc16a10);…
GO:0005667	transcription factor complex	16	147	0.992206	1	Sfur000321(Gtf3c1);Sfur002398(ZFHX4);Sfur002619(--);Sfur002772(Clk);Sfur002946(ATF7IP);Sfur003528(Taf2);Sfur003607(caz);Sfur005283(JUN);Sfur010293(TfIIFalpha);Sfur010563(MED6);Sfur010797(Arntl);Sfur011335(LDB2);Sfur012341(MED6);Sfur014127(Lpin1);Sfur014137(MED14);Sfur014618(KDM1A)
GO:0005886	plasma membrane	321	2015	0.992411	1	MSTRG.17552(C5);MSTRG.21722(ck);MSTRG.2266(--);Sfur000035(csbC);Sfur000082(stan);Sfur000167(STAC2);Sfur000219(FLNA);Sfur000224(NLGN4Y);Sfur000302(Hsp90b1);Sfur000322(SLC2A7);Sfur000336(slc20a1-a);Sfur000392(Hsp90b1);Sfur000490(--);Sfur000565(SNX4);Sfur000643(st);Sfur000791(Tret1);Sfur000804(--);Sfur000838(SLC26A11);Sfur000935(Trhde);Sfur000977(Wdr13);Sfur000982(l(2)gl);Sfur001000(Drip);Sfur001001…
GO:0042645	mitochondrial nucleoid	1	25	0.992414	1	Sfur014797(Dbt)
GO:0097060	synaptic membrane	18	162	0.992741	1	Sfur000224(NLGN4Y);Sfur000982(l(2)gl);Sfur001898(Gabbr1);Sfur001969(GRIK2);Sfur002443(znrf2);Sfur002888(Slc8a1);Sfur003099(grin2b);Sfur003132(DAT);Sfur003266(Akap1);Sfur003310(ggr-1);Sfur003329(--);Sfur003666(unc-64);Sfur005596(Ank3);Sfur007718(Dagla);Sfur010346(otof);Sfur012489(Abp1);Sfur014738(--);Sfur015324(-)
GO:0071011	precatalytic spliceosome	6	73	0.993545	1	Sfur000443(SmD2);Sfur005516(LSM6);Sfur005812(nito);Sfur010768(snRNP-U1-70K);Sfur014004(LSM3);Sfur015414(B52)
GO:0017053	transcriptional repressor complex	3	47	0.993683	1	Sfur000243(Tbl1x);Sfur009742(Sall3);Sfur010077(asf1)
GO:0009295	nucleoid	1	26	0.993761	1	Sfur014797(Dbt)
GO:0005887	integral component of plasma membrane	80	571	0.993974	1	Sfur000035(csbC);Sfur000224(NLGN4Y);Sfur000322(SLC2A7);Sfur000336(slc20a1-a);Sfur000838(SLC26A11);Sfur001001(SCARB1);Sfur001091(SPE);Sfur001562(KLK13);Sfur001672(LHCGR);Sfur001806(Slc16a10);Sfur001898(Gabbr1);Sfur001969(GRIK2);Sfur001985(fz2);Sfur002163(bdl);Sfur002336(ft);Sfur002394(Ano4);Sfur002888(Slc8a1);Sfur002901(ft);Sfur003094(ft);Sfur003099(grin2b);Sfur003132(DAT);Sfur003173(PTH1R);Sfur00…
GO:0044665	MLL1/2 complex	1	27	0.99487	1	Sfur007793(Hcfc1)
GO:0071013	catalytic step 2 spliceosome	7	83	0.9949	1	Sfur000443(SmD2);Sfur003607(caz);Sfur010216(Ppil1);Sfur010768(snRNP-U1-70K);Sfur013148(HNRNPR);Sfur014004(LSM3);Sfur015414(B52)
GO:0031226	intrinsic component of plasma membrane	82	588	0.995256	1	Sfur000035(csbC);Sfur000224(NLGN4Y);Sfur000322(SLC2A7);Sfur000336(slc20a1-a);Sfur000490(--);Sfur000838(SLC26A11);Sfur001001(SCARB1);Sfur001091(SPE);Sfur001562(KLK13);Sfur001672(LHCGR);Sfur001806(Slc16a10);Sfur001898(Gabbr1);Sfur001969(GRIK2);Sfur001985(fz2);Sfur002163(bdl);Sfur002336(ft);Sfur002394(Ano4);Sfur002888(Slc8a1);Sfur002901(ft);Sfur003094(ft);Sfur003099(grin2b);Sfur003132(DAT);Sfur00317…
GO:0031461	cullin-RING ubiquitin ligase complex	8	92	0.995472	1	Sfur000380(--);Sfur001474(Anapc4);Sfur002344(l(2)dtl);Sfur006367(ANAPC1);Sfur011598(Pdcd6);Sfur011621(Fbxl7);Sfur014346(gus);Sfur015428(--)
GO:0000781	chromosome, telomeric region	6	76	0.995663	1	Sfur003077(DCLRE1A);Sfur004856(CBX1);Sfur008569(SPO11);Sfur013467(Rif1);Sfur013892(rad50);Sfur014618(KDM1A)
GO:0005747	mitochondrial respiratory chain complex I	1	28	0.995781	1	Sfur002817(Y94H6A.8)
GO:0030964	NADH dehydrogenase complex	1	28	0.995781	1	Sfur002817(Y94H6A.8)
GO:0045271	respiratory chain complex I	1	28	0.995781	1	Sfur002817(Y94H6A.8)
GO:0031256	leading edge membrane	4	59	0.995875	1	Sfur000982(l(2)gl);Sfur001898(Gabbr1);Sfur003997(Ser);Sfur007718(Dagla)
GO:0055029	nuclear DNA-directed RNA polymerase complex	10	111	0.996915	1	Sfur000070(pola1);Sfur000753(POLR3F);Sfur003528(Taf2);Sfur003607(caz);Sfur006238(NIPBL);Sfur008486(DNApol-alpha60);Sfur010293(TfIIFalpha);Sfur010563(MED6);Sfur012341(MED6);Sfur014137(MED14)
GO:0070469	respiratory chain	4	61	0.996941	1	Sfur002817(Y94H6A.8);Sfur005773(COX5A);Sfur013176(Cox6a1);Sfur014287(COX4I2)
GO:0000428	DNA-directed RNA polymerase complex	10	112	0.997259	1	Sfur000070(pola1);Sfur000753(POLR3F);Sfur003528(Taf2);Sfur003607(caz);Sfur006238(NIPBL);Sfur008486(DNApol-alpha60);Sfur010293(TfIIFalpha);Sfur010563(MED6);Sfur012341(MED6);Sfur014137(MED14)
GO:0090575	RNA polymerase II transcription factor complex	6	80	0.997476	1	Sfur003528(Taf2);Sfur003607(caz);Sfur010293(TfIIFalpha);Sfur010563(MED6);Sfur012341(MED6);Sfur014137(MED14)
GO:0043005	neuron projection	87	632	0.99762	1	MSTRG.14692(MMP14);MSTRG.23721(ADCY9);MSTRG.32397(Hspa2);MSTRG.36634(IHH);MSTRG.7349(Rheb);Sfur000112(ZMYND8);Sfur000405(Ptbp1);Sfur000619(Dhc64C);Sfur000702(Svopl);Sfur001363(MTMR2);Sfur001898(Gabbr1);Sfur001969(GRIK2);Sfur002072(Ppt1);Sfur002079(PPP1R9A);Sfur002128(Lar);Sfur002163(bdl);Sfur002672(Lrp2);Sfur002888(Slc8a1);Sfur003132(DAT);Sfur003182(SOD1);Sfur003310(ggr-1);Sfur003329(--);Sfur0035…
GO:0043228	non-membrane-bounded organelle	371	2345	0.997745	1	MSTRG.10604(dnm1l);MSTRG.14617(RANBP1);MSTRG.15727(ACAA2);MSTRG.16085(Mapre3);MSTRG.21722(ck);MSTRG.32159(Mylk);MSTRG.32162(unc-89);MSTRG.32164(CCDC141);MSTRG.32397(Hspa2);MSTRG.34003(Hsc70-3);MSTRG.34004(Hsc70-3);MSTRG.3655(--);MSTRG.36572(smc1a);MSTRG.36688(UPP2);MSTRG.7293(--);MSTRG.9150(DDX52);Sfur000038(BUB1);Sfur000070(pola1);Sfur000071(Mcm7);Sfur000095(polo);Sfur000109(ddx11);Sfur000145(Mc…
GO:0043232	intracellular non-membrane-bounded organelle	371	2345	0.997745	1	MSTRG.10604(dnm1l);MSTRG.14617(RANBP1);MSTRG.15727(ACAA2);MSTRG.16085(Mapre3);MSTRG.21722(ck);MSTRG.32159(Mylk);MSTRG.32162(unc-89);MSTRG.32164(CCDC141);MSTRG.32397(Hspa2);MSTRG.34003(Hsc70-3);MSTRG.34004(Hsc70-3);MSTRG.3655(--);MSTRG.36572(smc1a);MSTRG.36688(UPP2);MSTRG.7293(--);MSTRG.9150(DDX52);Sfur000038(BUB1);Sfur000070(pola1);Sfur000071(Mcm7);Sfur000095(polo);Sfur000109(ddx11);Sfur000145(Mc…
GO:0030880	RNA polymerase complex	10	114	0.997839	1	Sfur000070(pola1);Sfur000753(POLR3F);Sfur003528(Taf2);Sfur003607(caz);Sfur006238(NIPBL);Sfur008486(DNApol-alpha60);Sfur010293(TfIIFalpha);Sfur010563(MED6);Sfur012341(MED6);Sfur014137(MED14)
GO:0031304	intrinsic component of mitochondrial inner membrane	1	32	0.998071	1	Sfur004996(to)
GO:0031305	integral component of mitochondrial inner membrane	1	32	0.998071	1	Sfur004996(to)
GO:0016604	nuclear body	46	370	0.998111	1	Sfur000672(SRSF2);Sfur001080(Ppig);Sfur001144(Hrb87F);Sfur001236(Sym);Sfur002398(ZFHX4);Sfur002834(PPIH);Sfur002946(ATF7IP);Sfur003002(mle);Sfur003749(rnps1-b);Sfur004029(ppp1cc-a);Sfur004083(Morf4l1);Sfur004157(ppp1cc-a);Sfur004267(Morf4l1);Sfur004627(Stag1);Sfur004691(UBE2R2);Sfur005717(thoc6);Sfur006056(--);Sfur006579(PGBD2);Sfur006678(AKAP17A);Sfur006704(ascc3);Sfur007421(Rreb1);Sfur007915(--…
GO:0044445	cytosolic part	8	99	0.998122	1	Sfur003690(--);Sfur005188(--);Sfur012506(APOD);Sfur012609(--);Sfur013438(Pfk);Sfur013683(APOD);Sfur013954(APOD);Sfur014182(APOD)
GO:0044422	organelle part	774	4666	0.998159	1	MSTRG.10604(dnm1l);MSTRG.14537(ELOVL);MSTRG.14617(RANBP1);MSTRG.14666(Stt3a);MSTRG.1499(--);MSTRG.1537(SYMPK);MSTRG.15727(ACAA2);MSTRG.16085(Mapre3);MSTRG.21722(ck);MSTRG.22416(DCPS);MSTRG.23723(lva);MSTRG.32159(Mylk);MSTRG.32162(unc-89);MSTRG.32164(CCDC141);MSTRG.32291(Nelf-E);MSTRG.3384(Claspin);MSTRG.34003(Hsc70-3);MSTRG.34004(Hsc70-3);MSTRG.36382(SLC25A27);MSTRG.36572(smc1a);MSTRG.36688(UPP2)…
GO:0031519	PcG protein complex	1	33	0.998414	1	Sfur007688(eed)
GO:0016591	DNA-directed RNA polymerase II, holoenzyme	7	93	0.998623	1	Sfur003528(Taf2);Sfur003607(caz);Sfur006238(NIPBL);Sfur010293(TfIIFalpha);Sfur010563(MED6);Sfur012341(MED6);Sfur014137(MED14)
GO:0005681	spliceosomal complex	17	172	0.998675	1	Sfur000443(SmD2);Sfur000450(gpkow);Sfur000672(SRSF2);Sfur002293(HNRNPM);Sfur002834(PPIH);Sfur003542(prkrip1);Sfur003607(caz);Sfur005096(Cwf19l1);Sfur005516(LSM6);Sfur005812(nito);Sfur006678(AKAP17A);Sfur006774(--);Sfur010216(Ppil1);Sfur010768(snRNP-U1-70K);Sfur013148(HNRNPR);Sfur014004(LSM3);Sfur015414(B52)
GO:0030684	preribosome	3	58	0.998923	1	MSTRG.15727(ACAA2);Sfur004883(CG1789);Sfur006361(CG3527)
GO:0005684	U2-type spliceosomal complex	4	71	0.999341	1	Sfur005516(LSM6);Sfur010216(Ppil1);Sfur010768(snRNP-U1-70K);Sfur014004(LSM3)
GO:1902495	transmembrane transporter complex	14	156	0.999374	1	Sfur001969(GRIK2);Sfur002394(Ano4);Sfur003099(grin2b);Sfur003310(ggr-1);Sfur005382(PKD2);Sfur009374(CNGB1);Sfur009604(Dpp10);Sfur010100(BEST3);Sfur010345(abcG23);Sfur012519(abcG23);Sfur013450(ClC-a);Sfur014188(por);Sfur014302(ABCB6);Sfur014776(pyx)
GO:0005829	cytosol	245	1634	0.99945	1	Sfur000038(BUB1);Sfur000157(HAO1);Sfur000167(STAC2);Sfur000219(FLNA);Sfur000302(Hsp90b1);Sfur000380(--);Sfur000386(--);Sfur000392(Hsp90b1);Sfur000483(PKLR);Sfur000549(STRAP);Sfur000649(Gpdh);Sfur000667(PCBP3);Sfur000672(SRSF2);Sfur000753(POLR3F);Sfur000804(--);Sfur000970(zip);Sfur001080(Ppig);Sfur001100(--);Sfur001129(CISH);Sfur001261(aop);Sfur001318(rg);Sfur001363(MTMR2);Sfur001415(Pnpla2);Sfur0…
GO:0044446	intracellular organelle part	744	4536	0.999494	1	MSTRG.10604(dnm1l);MSTRG.14537(ELOVL);MSTRG.14617(RANBP1);MSTRG.1499(--);MSTRG.1537(SYMPK);MSTRG.15727(ACAA2);MSTRG.16085(Mapre3);MSTRG.21722(ck);MSTRG.22416(DCPS);MSTRG.23723(lva);MSTRG.32291(Nelf-E);MSTRG.3384(Claspin);MSTRG.34003(Hsc70-3);MSTRG.34004(Hsc70-3);MSTRG.36382(SLC25A27);MSTRG.36572(smc1a);MSTRG.36688(UPP2);MSTRG.38817(Itpr);MSTRG.7293(--);MSTRG.9032(Mcm6);MSTRG.9036(Mcm6);Sfur000035…
GO:0034702	ion channel complex	11	134	0.999497	1	Sfur001969(GRIK2);Sfur002394(Ano4);Sfur003099(grin2b);Sfur003310(ggr-1);Sfur005382(PKD2);Sfur009374(CNGB1);Sfur009604(Dpp10);Sfur010100(BEST3);Sfur013450(ClC-a);Sfur014188(por);Sfur014776(pyx)
GO:0034703	cation channel complex	4	73	0.999518	1	Sfur005382(PKD2);Sfur009374(CNGB1);Sfur009604(Dpp10);Sfur014776(pyx)
GO:0035097	histone methyltransferase complex	3	63	0.999529	1	Sfur007688(eed);Sfur007731(Kdm5a);Sfur007793(Hcfc1)
GO:0098796	membrane protein complex	67	529	0.999537	1	Sfur000079(RRAGA);Sfur000565(SNX4);Sfur000867(SEC11A);Sfur001004(atp6v0a1);Sfur001129(CISH);Sfur001151(PDIA3);Sfur001376(--);Sfur001531(COPB1);Sfur001681(Spase22-23);Sfur001898(Gabbr1);Sfur001969(GRIK2);Sfur002394(Ano4);Sfur002817(Y94H6A.8);Sfur003099(grin2b);Sfur003310(ggr-1);Sfur003329(--);Sfur003666(unc-64);Sfur003703(At1g06840);Sfur004248(AP2M1);Sfur004484(Hm13);Sfur004599(use1);Sfur004693(CO…
GO:1990351	transporter complex	14	159	0.999557	1	Sfur001969(GRIK2);Sfur002394(Ano4);Sfur003099(grin2b);Sfur003310(ggr-1);Sfur005382(PKD2);Sfur009374(CNGB1);Sfur009604(Dpp10);Sfur010100(BEST3);Sfur010345(abcG23);Sfur012519(abcG23);Sfur013450(ClC-a);Sfur014188(por);Sfur014302(ABCB6);Sfur014776(pyx)
GO:1990234	transferase complex	65	517	0.999575	1	MSTRG.7293(--);Sfur000070(pola1);Sfur000380(--);Sfur000753(POLR3F);Sfur000867(SEC11A);Sfur000927(Mrgbp);Sfur000997(Phf14);Sfur001129(CISH);Sfur001156(--);Sfur001474(Anapc4);Sfur001681(Spase22-23);Sfur001830(LUBEL);Sfur001932(cdk14);Sfur002027(TPS1);Sfur002344(l(2)dtl);Sfur003025(ACTL6B);Sfur003211(Trmt61a);Sfur003528(Taf2);Sfur003607(caz);Sfur004083(Morf4l1);Sfur004267(Morf4l1);Sfur005031(Dad1);S…
GO:0098802	plasma membrane receptor complex	4	74	0.999589	1	Sfur001898(Gabbr1);Sfur001969(GRIK2);Sfur003099(grin2b);Sfur014188(por)
GO:0098794	postsynapse	22	222	0.999647	1	Sfur000112(ZMYND8);Sfur000224(NLGN4Y);Sfur001898(Gabbr1);Sfur001969(GRIK2);Sfur002079(PPP1R9A);Sfur002888(Slc8a1);Sfur003099(grin2b);Sfur003266(Akap1);Sfur003310(ggr-1);Sfur004463(Pdzd2);Sfur005383(--);Sfur005596(Ank3);Sfur005803(Pdzd2);Sfur006059(SLC17A7);Sfur007718(Dagla);Sfur007797(BMPR2);Sfur009256(PSMA7);Sfur009577(Shank3);Sfur012489(Abp1);Sfur014738(--);Sfur014883(PPFIA1);Sfur015324(-)
GO:0000151	ubiquitin ligase complex	14	161	0.999649	1	MSTRG.7293(--);Sfur000380(--);Sfur001474(Anapc4);Sfur001830(LUBEL);Sfur002344(l(2)dtl);Sfur005057(DERL1);Sfur006367(ANAPC1);Sfur009737(UBE2L5);Sfur011425(--);Sfur011598(Pdcd6);Sfur011621(Fbxl7);Sfur013823(UBE2L3);Sfur014346(gus);Sfur015428(--)
GO:0098800	inner mitochondrial membrane protein complex	5	85	0.999666	1	Sfur002817(Y94H6A.8);Sfur004996(to);Sfur005773(COX5A);Sfur013176(Cox6a1);Sfur014287(COX4I2)
GO:1902494	catalytic complex	99	748	0.999774	1	MSTRG.7293(--);Sfur000070(pola1);Sfur000243(Tbl1x);Sfur000380(--);Sfur000565(SNX4);Sfur000619(Dhc64C);Sfur000649(Gpdh);Sfur000753(POLR3F);Sfur000867(SEC11A);Sfur000898(T05H10.6);Sfur000927(Mrgbp);Sfur000997(Phf14);Sfur001116(ctp);Sfur001129(CISH);Sfur001156(--);Sfur001301(Dnah1);Sfur001474(Anapc4);Sfur001681(Spase22-23);Sfur001830(LUBEL);Sfur001869(Act5C);Sfur001932(cdk14);Sfur001975(ccdc103);Sfu…
GO:0044452	nucleolar part	3	68	0.999796	1	Sfur007421(Rreb1);Sfur012397(CAMK4);Sfur013136(PTPN13)
GO:0031966	mitochondrial membrane	47	406	0.999804	1	MSTRG.10604(dnm1l);Sfur000240(HADHB);Sfur000262(Nnt);Sfur000347(NNT);Sfur000966(OMA1);Sfur001154(RDH13);Sfur001254(Cyp301a1);Sfur001898(Gabbr1);Sfur001998(SLC25A19);Sfur002158(dnm1l);Sfur002537(Bmcp);Sfur002817(Y94H6A.8);Sfur003266(Akap1);Sfur003650(DNM1L);Sfur004996(to);Sfur005053(Taz);Sfur005310(Ucp2);Sfur005383(--);Sfur005401(myo19);Sfur005773(COX5A);Sfur005777(Pnpla8);Sfur006033(SLC25A21);Sfu…
GO:0044456	synapse part	49	423	0.99985	1	Sfur000035(csbC);Sfur000112(ZMYND8);Sfur000224(NLGN4Y);Sfur000322(SLC2A7);Sfur000643(st);Sfur000702(Svopl);Sfur000982(l(2)gl);Sfur001898(Gabbr1);Sfur001969(GRIK2);Sfur002072(Ppt1);Sfur002079(PPP1R9A);Sfur002158(dnm1l);Sfur002443(znrf2);Sfur002888(Slc8a1);Sfur003099(grin2b);Sfur003132(DAT);Sfur003266(Akap1);Sfur003310(ggr-1);Sfur003329(--);Sfur003650(DNM1L);Sfur003666(unc-64);Sfur003756(slc17a8);S…
GO:0005759	mitochondrial matrix	24	248	0.999888	1	Sfur000815(AUH);Sfur000898(T05H10.6);Sfur002664(mrp);Sfur002786(MDH2);Sfur003398(MMAB);Sfur004887(ETNPPL);Sfur005215(ACADS);Sfur005753(TK2);Sfur005767(ACAA2);Sfur006093(HSD11B2);Sfur007782(ALDH1L2);Sfur009701(AAEL002956);Sfur012045(Sirt3);Sfur012504(HMGCL);Sfur012934(Gdh);Sfur012973(Mipep);Sfur013135(Aldh2);Sfur013548(PDHB);Sfur013726(IDH1);Sfur013861(--);Sfur014454(arg1);Sfur014793(OGDH);Sfur014…
GO:0031970	organelle envelope lumen	1	47	0.999898	1	Sfur006841(PTGES)
GO:0043235	receptor complex	11	148	0.999915	1	Sfur001898(Gabbr1);Sfur001969(GRIK2);Sfur002672(Lrp2);Sfur003099(grin2b);Sfur007288(LRP1);Sfur007797(BMPR2);Sfur008719(Alk);Sfur009374(CNGB1);Sfur013145(dnt);Sfur013460(--);Sfur014188(por)
GO:0098798	mitochondrial protein complex	7	120	0.99997	1	Sfur000898(T05H10.6);Sfur002817(Y94H6A.8);Sfur004996(to);Sfur005773(COX5A);Sfur013176(Cox6a1);Sfur013548(PDHB);Sfur014287(COX4I2)
GO:0005740	mitochondrial envelope	47	431	0.999977	1	MSTRG.10604(dnm1l);Sfur000240(HADHB);Sfur000262(Nnt);Sfur000347(NNT);Sfur000966(OMA1);Sfur001154(RDH13);Sfur001254(Cyp301a1);Sfur001898(Gabbr1);Sfur001998(SLC25A19);Sfur002158(dnm1l);Sfur002537(Bmcp);Sfur002817(Y94H6A.8);Sfur003266(Akap1);Sfur003650(DNM1L);Sfur004996(to);Sfur005053(Taz);Sfur005310(Ucp2);Sfur005383(--);Sfur005401(myo19);Sfur005773(COX5A);Sfur005777(Pnpla8);Sfur006033(SLC25A21);Sfu…
GO:0044451	nucleoplasm part	84	686	0.999981	1	MSTRG.32291(Nelf-E);Sfur000071(Mcm7);Sfur000145(Mcm7);Sfur000243(Tbl1x);Sfur000672(SRSF2);Sfur000721(MED21);Sfur000753(POLR3F);Sfur000927(Mrgbp);Sfur000997(Phf14);Sfur001080(Ppig);Sfur001144(Hrb87F);Sfur001236(Sym);Sfur002315(dpa);Sfur002398(ZFHX4);Sfur002437(cdk9);Sfur002834(PPIH);Sfur002946(ATF7IP);Sfur003002(mle);Sfur003025(ACTL6B);Sfur003528(Taf2);Sfur003607(caz);Sfur003749(rnps1-b);Sfur00375…
GO:0044455	mitochondrial membrane part	9	143	0.999985	1	Sfur002817(Y94H6A.8);Sfur003266(Akap1);Sfur004996(to);Sfur005773(COX5A);Sfur006093(HSD11B2);Sfur008638(Adck1);Sfur013176(Cox6a1);Sfur014287(COX4I2);Sfur014302(ABCB6)
GO:0098797	plasma membrane protein complex	15	195	0.999985	1	Sfur001376(--);Sfur001898(Gabbr1);Sfur001969(GRIK2);Sfur003099(grin2b);Sfur004248(AP2M1);Sfur005509(Nct);Sfur007288(LRP1);Sfur008260(Slc7a5);Sfur009604(Dpp10);Sfur010345(abcG23);Sfur012519(abcG23);Sfur013642(ATP6V0D1);Sfur013669(Cdh23);Sfur014188(por);Sfur014302(ABCB6)
GO:0031967	organelle envelope	73	622	0.999991	1	MSTRG.10604(dnm1l);MSTRG.15727(ACAA2);MSTRG.36382(SLC25A27);MSTRG.38817(Itpr);Sfur000070(pola1);Sfur000095(polo);Sfur000209(Uggt);Sfur000240(HADHB);Sfur000262(Nnt);Sfur000347(NNT);Sfur000966(OMA1);Sfur001100(--);Sfur001154(RDH13);Sfur001254(Cyp301a1);Sfur001898(Gabbr1);Sfur001998(SLC25A19);Sfur002158(dnm1l);Sfur002537(Bmcp);Sfur002558(Pdi);Sfur002817(Y94H6A.8);Sfur003266(Akap1);Sfur003408(Mad2l1)…
GO:0031975	envelope	73	623	0.999992	1	MSTRG.10604(dnm1l);MSTRG.15727(ACAA2);MSTRG.36382(SLC25A27);MSTRG.38817(Itpr);Sfur000070(pola1);Sfur000095(polo);Sfur000209(Uggt);Sfur000240(HADHB);Sfur000262(Nnt);Sfur000347(NNT);Sfur000966(OMA1);Sfur001100(--);Sfur001154(RDH13);Sfur001254(Cyp301a1);Sfur001898(Gabbr1);Sfur001998(SLC25A19);Sfur002158(dnm1l);Sfur002537(Bmcp);Sfur002558(Pdi);Sfur002817(Y94H6A.8);Sfur003266(Akap1);Sfur003408(Mad2l1)…
GO:0005739	mitochondrion	122	952	0.999994	1	MSTRG.10604(dnm1l);MSTRG.15727(ACAA2);Sfur000111(Arsb);Sfur000240(HADHB);Sfur000262(Nnt);Sfur000347(NNT);Sfur000373(OXR1);Sfur000386(--);Sfur000815(AUH);Sfur000870(hoga1);Sfur000898(T05H10.6);Sfur000966(OMA1);Sfur001154(RDH13);Sfur001254(Cyp301a1);Sfur001405(CG13601);Sfur001898(Gabbr1);Sfur001998(SLC25A19);Sfur002093(AGXT2);Sfur002158(dnm1l);Sfur002197(ABCG1);Sfur002336(ft);Sfur002537(Bmcp);Sfur0…
GO:0019866	organelle inner membrane	29	315	0.999995	1	MSTRG.15727(ACAA2);MSTRG.36382(SLC25A27);Sfur000240(HADHB);Sfur000262(Nnt);Sfur000347(NNT);Sfur000966(OMA1);Sfur001154(RDH13);Sfur001998(SLC25A19);Sfur002537(Bmcp);Sfur002817(Y94H6A.8);Sfur003266(Akap1);Sfur004996(to);Sfur005310(Ucp2);Sfur005773(COX5A);Sfur006033(SLC25A21);Sfur006093(HSD11B2);Sfur008638(Adck1);Sfur008914(GPD2);Sfur010138(Mtch2);Sfur010501(sesB);Sfur011283(Aldh18a1);Sfur011683(MFS…
GO:0045202	synapse	64	582	0.999999	1	Sfur000035(csbC);Sfur000112(ZMYND8);Sfur000224(NLGN4Y);Sfur000322(SLC2A7);Sfur000643(st);Sfur000702(Svopl);Sfur000982(l(2)gl);Sfur001369(Plaa);Sfur001652(alpha-Spec);Sfur001898(Gabbr1);Sfur001969(GRIK2);Sfur002072(Ppt1);Sfur002079(PPP1R9A);Sfur002158(dnm1l);Sfur002443(znrf2);Sfur002888(Slc8a1);Sfur003099(grin2b);Sfur003132(DAT);Sfur003266(Akap1);Sfur003310(ggr-1);Sfur003329(--);Sfur003650(DNM1L);…
GO:0005743	mitochondrial inner membrane	24	288	0.999999	1	Sfur000240(HADHB);Sfur000262(Nnt);Sfur000347(NNT);Sfur000966(OMA1);Sfur001154(RDH13);Sfur001998(SLC25A19);Sfur002537(Bmcp);Sfur002817(Y94H6A.8);Sfur003266(Akap1);Sfur004996(to);Sfur005310(Ucp2);Sfur005773(COX5A);Sfur006033(SLC25A21);Sfur006093(HSD11B2);Sfur008638(Adck1);Sfur008914(GPD2);Sfur010138(Mtch2);Sfur010501(sesB);Sfur011283(Aldh18a1);Sfur012045(Sirt3);Sfur013170(Slc25a16);Sfur013176(Cox6a…
GO:0005840	ribosome	10	174	0.999999	1	Sfur003002(mle);Sfur003200(GCN1);Sfur003690(--);Sfur007990(RpS18);Sfur012506(APOD);Sfur012609(--);Sfur013683(APOD);Sfur013954(APOD);Sfur014179(ATM);Sfur014182(APOD)
GO:0005730	nucleolus	39	411	0.999999	1	Sfur000070(pola1);Sfur000109(ddx11);Sfur000321(Gtf3c1);Sfur000373(OXR1);Sfur000380(--);Sfur001906(ARFGEF1);Sfur002645(APTX);Sfur003002(mle);Sfur003542(prkrip1);Sfur003759(Ssrp);Sfur004029(ppp1cc-a);Sfur004157(ppp1cc-a);Sfur004225(CAMTA1);Sfur004883(CG1789);Sfur005167(KIF20B);Sfur005178(SMC2);Sfur005516(LSM6);Sfur006361(CG3527);Sfur007057(Wdr62);Sfur007421(Rreb1);Sfur007731(Kdm5a);Sfur008580(ERGIC…
GO:0044429	mitochondrial part	68	629	1	1	MSTRG.10604(dnm1l);MSTRG.15727(ACAA2);Sfur000240(HADHB);Sfur000262(Nnt);Sfur000347(NNT);Sfur000815(AUH);Sfur000898(T05H10.6);Sfur000966(OMA1);Sfur001154(RDH13);Sfur001254(Cyp301a1);Sfur001898(Gabbr1);Sfur001998(SLC25A19);Sfur002158(dnm1l);Sfur002537(Bmcp);Sfur002664(mrp);Sfur002786(MDH2);Sfur002817(Y94H6A.8);Sfur003266(Akap1);Sfur003398(MMAB);Sfur003650(DNM1L);Sfur004887(ETNPPL);Sfur004996(to);Sf…
GO:0043234	protein complex	307	2202	1	1	MSTRG.1499(--);MSTRG.15727(ACAA2);MSTRG.21722(ck);MSTRG.32291(Nelf-E);MSTRG.32397(Hspa2);MSTRG.34003(Hsc70-3);MSTRG.34004(Hsc70-3);MSTRG.36572(smc1a);MSTRG.38817(Itpr);MSTRG.7293(--);MSTRG.9032(Mcm6);MSTRG.9036(Mcm6);Sfur000038(BUB1);Sfur000070(pola1);Sfur000071(Mcm7);Sfur000079(RRAGA);Sfur000095(polo);Sfur000145(Mcm7);Sfur000243(Tbl1x);Sfur000269(alphaTub84B);Sfur000302(Hsp90b1);Sfur000321(Gtf3c…
GO:0043226	organelle	1080	6641	1	1	MSTRG.10604(dnm1l);MSTRG.14537(ELOVL);MSTRG.14617(RANBP1);MSTRG.14666(Stt3a);MSTRG.1499(--);MSTRG.1537(SYMPK);MSTRG.15727(ACAA2);MSTRG.16085(Mapre3);MSTRG.2005(UGGT1);MSTRG.21722(ck);MSTRG.22416(DCPS);MSTRG.23723(lva);MSTRG.29743(nas-13);MSTRG.31937(Gen);MSTRG.32159(Mylk);MSTRG.32162(unc-89);MSTRG.32164(CCDC141);MSTRG.32291(Nelf-E);MSTRG.3233(SI);MSTRG.32397(Hspa2);MSTRG.32515(MICAL3);MSTRG.3384(…
GO:0043229	intracellular organelle	1057	6523	1	1	MSTRG.10604(dnm1l);MSTRG.14537(ELOVL);MSTRG.14617(RANBP1);MSTRG.14666(Stt3a);MSTRG.1499(--);MSTRG.1537(SYMPK);MSTRG.15727(ACAA2);MSTRG.16085(Mapre3);MSTRG.2005(UGGT1);MSTRG.21722(ck);MSTRG.22416(DCPS);MSTRG.23723(lva);MSTRG.29743(nas-13);MSTRG.31937(Gen);MSTRG.32159(Mylk);MSTRG.32162(unc-89);MSTRG.32164(CCDC141);MSTRG.32291(Nelf-E);MSTRG.3233(SI);MSTRG.32397(Hspa2);MSTRG.32515(MICAL3);MSTRG.3384(…
GO:0005654	nucleoplasm	190	1514	1	1	MSTRG.32291(Nelf-E);Sfur000038(BUB1);Sfur000070(pola1);Sfur000071(Mcm7);Sfur000112(ZMYND8);Sfur000145(Mcm7);Sfur000238(CHERP);Sfur000243(Tbl1x);Sfur000280(cwo);Sfur000321(Gtf3c1);Sfur000380(--);Sfur000672(SRSF2);Sfur000721(MED21);Sfur000753(POLR3F);Sfur000838(SLC26A11);Sfur000927(Mrgbp);Sfur000977(Wdr13);Sfur000997(Phf14);Sfur001080(Ppig);Sfur001100(--);Sfur001142(Esco2);Sfur001144(Hrb87F);Sfur00…
GO:0043231	intracellular membrane-bounded organelle	929	5873	1	1	MSTRG.10604(dnm1l);MSTRG.14537(ELOVL);MSTRG.14617(RANBP1);MSTRG.14666(Stt3a);MSTRG.1499(--);MSTRG.1537(SYMPK);MSTRG.15727(ACAA2);MSTRG.2005(UGGT1);MSTRG.21722(ck);MSTRG.22416(DCPS);MSTRG.23723(lva);MSTRG.32291(Nelf-E);MSTRG.3233(SI);MSTRG.32397(Hspa2);MSTRG.32515(MICAL3);MSTRG.3384(Claspin);MSTRG.34003(Hsc70-3);MSTRG.34004(Hsc70-3);MSTRG.36382(SLC25A27);MSTRG.36572(smc1a);MSTRG.36634(IHH);MSTRG.3…
GO:0043227	membrane-bounded organelle	946	5978	1	1	MSTRG.10604(dnm1l);MSTRG.14537(ELOVL);MSTRG.14617(RANBP1);MSTRG.14666(Stt3a);MSTRG.1499(--);MSTRG.1537(SYMPK);MSTRG.15727(ACAA2);MSTRG.2005(UGGT1);MSTRG.21722(ck);MSTRG.22416(DCPS);MSTRG.23723(lva);MSTRG.31937(Gen);MSTRG.32291(Nelf-E);MSTRG.3233(SI);MSTRG.32397(Hspa2);MSTRG.32515(MICAL3);MSTRG.3384(Claspin);MSTRG.34003(Hsc70-3);MSTRG.34004(Hsc70-3);MSTRG.36382(SLC25A27);MSTRG.36572(smc1a);MSTRG.3…
[truncated: 8,770 more rows]

## Sheet: PE-VS-AE  cis GO
cis-diff.C
GO ID	Description	cis_diff (74)	All (9162)	pvalue	p.adjust	Genes
GO:0033391	chromatoid body	2	2	6.43608e-05	0.0158328	Sfur010763(Clock);Sfur010797(Arntl)
GO:0034045	pre-autophagosomal structure membrane	2	9	0.00223347	0.274716	Sfur008091(RB1CC1);Sfur013517(ATG16L1)
[truncated: 2,275 more rows]

## Sheet: PE-VS-AE  trans GO
trans.C
GO ID	Description	trans (1720)	All (9162)	pvalue	p.adjust	Genes
[truncated: 9,827 more rows]

## Sheet: DE-VS-AE  cis GO
cis.diff.C
[truncated: 103 more rows]

[truncated: 1 more sheets: DE-VS-AE trans GO]
