# Supplementary material for: Interaction Analysis of lncRNA and mRNA Based on the Full-Length Transcriptome of the Nymph-to-Adult Developmental Transition of Sogatella furcifera
Source: Insects. 2023 Mar 23;14(4):308. doi: 10.3390/insects14040308 (PMC10141146; doi:10.3390/insects14040308)
Supplement: Supplementary file 1 [file insects-14-00308-s001.zip › Table S9. KEGG enrichment analysis of target gene.xlsx]

## Sheet: PE-vs-DE
CIS
KEGG_A_class	KEGG_B_class	Pathway	cis_diff (42)	All (6457)	Pvalue	Qvalue	Pathway ID	Genes	K_IDs
Metabolism	Metabolism of cofactors and vitamins	Pantothenate and CoA biosynthesis	3	16	0.000135	0.012973	ko00770	Sfur011355(gadl1);MSTRG.24156(PANK1);MSTRG.24157(PANK1)	K18966+K09680+K09680
Metabolism	Lipid metabolism	Fatty acid degradation	3	54	0.005042	0.242007	ko00071	Sfur005767(ACAA2);Sfur014800(ACP21);Sfur015309(ACP21)	K07508+K13238+K13238
Cellular Processes	Cellular community - eukaryotes	Gap junction	3	88	0.019153	0.515024	ko04540	Sfur007675(Gpr161);MSTRG.24261(TUBA4A);MSTRG.4305(--)	K04145+K07374+K07376
Genetic Information Processing	Replication and repair	Base excision repair	2	35	0.021459	0.515024	ko03410	MSTRG.27247(Fen1);MSTRG.33856(Ogg1)	K04799+K03660
Cellular Processes	Transport and catabolism	Autophagy - animal	4	198	0.038744	0.670595	ko04140	Sfur005841(RB1CC1);Sfur008091(RB1CC1);Sfur013517(ATG16L1);MSTRG.24264(BNIP3)	K17589+K17589+K17890+K15464
Metabolism	Biosynthesis of other secondary metabolites	Caffeine metabolism	1	8	0.050894	0.670595	ko00232	Sfur009447(Uro)	K00365
Metabolism	Metabolism of other amino acids	Taurine and hypotaurine metabolism	1	11	0.06932	0.670595	ko00430	Sfur011355(gadl1)	K18966
Genetic Information Processing	Replication and repair	Non-homologous end-joining	1	13	0.081409	0.670595	ko03450	MSTRG.27247(Fen1)	K04799
Organismal Systems	Immune system	Toll and Imd signaling pathway	2	77	0.089037	0.670595	ko04624	Sfur000631(SPE);MSTRG.28015(dl)	K20672+K09254
Organismal Systems	Aging	Longevity regulating pathway - mammal	2	80	0.095009	0.670595	ko04211	Sfur005841(RB1CC1);Sfur008091(RB1CC1)	K17589+K17589
Organismal Systems	Environmental adaptation	Circadian rhythm - fly	1	16	0.099257	0.670595	ko04711	Sfur010797(Arntl)	K02296
Organismal Systems	Environmental adaptation	Circadian rhythm	1	18	0.110966	0.670595	ko04710	Sfur010797(Arntl)	K02296
Cellular Processes	Transport and catabolism	Lysosome	3	182	0.113896	0.670595	ko04142	Sfur000028(GD10667);Sfur000424(CG17119);Sfur000881(Lip1)	K01444+K12386+K01052
Organismal Systems	Nervous system	Dopaminergic synapse	2	96	0.128629	0.670595	ko04728	Sfur007675(Gpr161);Sfur010797(Arntl)	K04145+K02296
Organismal Systems	Immune system	Platelet activation	2	109	0.157705	0.670595	ko04611	Sfur000156(--);MSTRG.4305(--)	K16059+K07376
Metabolism	Glycan biosynthesis and metabolism	Glycosylphosphatidylinositol(GPI)-anchor biosynthesis	1	27	0.161846	0.670595	ko00563	Sfur005629(Pigu)	K05293
Human Diseases	Neurodegenerative disease	Spinocerebellar ataxia	2	118	0.178514	0.670595	ko05017	Sfur005841(RB1CC1);Sfur008091(RB1CC1)	K17589+K17589
Metabolism	Glycan biosynthesis and metabolism	Other glycan degradation	1	31	0.183537	0.670595	ko00511	Sfur000028(GD10667)	K01444
Organismal Systems	Digestive system	Protein digestion and absorption	2	121	0.185548	0.670595	ko04974	MSTRG.32271(CG1139);MSTRG.33770(--)	K14209+K06237
Metabolism	Metabolism of other amino acids	beta-Alanine metabolism	1	35	0.204679	0.670595	ko00410	Sfur011355(gadl1)	K18966
Human Diseases	Infectious diseases	Legionellosis	1	35	0.204679	0.670595	ko05134	MSTRG.24264(BNIP3)	K15464
Metabolism	Carbohydrate metabolism	Pentose phosphate pathway	1	38	0.220184	0.670595	ko00030	Sfur006937(LMJF_27_0420)	K00852
Metabolism	Lipid metabolism	Steroid biosynthesis	1	38	0.220184	0.670595	ko00100	Sfur000881(Lip1)	K01052
Organismal Systems	Digestive system	Mineral absorption	1	39	0.225286	0.670595	ko04978	Sfur008868(ATOX1)	K07213
Human Diseases	Neurodegenerative diseases	Huntington disease	4	376	0.226812	0.670595	ko05016	Sfur005841(RB1CC1);Sfur006024(BAHD1);Sfur008091(RB1CC1);MSTRG.24261(TUBA4A)	K17589+K04533+K17589+K07374
Organismal Systems	Nervous system	Long-term depression	1	40	0.230356	0.670595	ko04730	MSTRG.4305(--)	K07376
Human Diseases	Substance dependence	Cocaine addiction	1	40	0.230356	0.670595	ko05030	Sfur007675(Gpr161)	K04145
Metabolism	Global and overview maps	Metabolic pathways	13	1615	0.233497	0.670595	ko01100	Sfur001481(Oacyl);Sfur003398(MMAB);Sfur005629(Pigu);Sfur005767(ACAA2);Sfur006776(ASH1L);Sfur006937(LMJF_27_0420);Sfur009447(Uro);Sfur009957(Upp1);Sfur010067(pde-5);Sfur011355(gadl1);MSTRG.14666(Stt3a);MSTRG.24156(PANK1);MSTRG.24157(PANK1)	K01183+K00798+K05293+K07508+K06101+K00852+K00365+K00757+K18438+K18966+K07151+K09680+K09680
Metabolism	Lipid metabolism	Fatty acid elongation	1	41	0.235393	0.670595	ko00062	Sfur005767(ACAA2)	K07508
Organismal Systems	Sensory system	Olfactory transduction	1	41	0.235393	0.670595	ko04740	MSTRG.4305(--)	K07376
Metabolism	Nucleotide metabolism	Purine metabolism	2	142	0.235732	0.670595	ko00230	Sfur009447(Uro);Sfur010067(pde-5)	K00365+K18438
Human Diseases	Cancers	Transcriptional misregulation in cancers	2	148	0.250262	0.670595	ko05202	Sfur009576(SS18L1);MSTRG.28015(dl)	K15623+K09254
Metabolism	Nucleotide metabolism	Pyrimidine metabolism	1	45	0.255223	0.670595	ko00240	Sfur009957(Upp1)	K00757
Metabolism	Metabolism of cofactors and vitamins	Porphyrin and chlorophyll metabolism	1	46	0.260101	0.670595	ko00860	Sfur003398(MMAB)	K00798
Genetic Information Processing	Replication and repair	DNA replication	1	46	0.260101	0.670595	ko03030	MSTRG.27247(Fen1)	K04799
Metabolism	Amino acid metabolism	Valine, leucine and isoleucine degradation	1	47	0.264949	0.670595	ko00280	Sfur005767(ACAA2)	K07508
Environmental Information Processing	Signal transduction	ErbB signaling pathway	1	47	0.264949	0.670595	ko04012	MSTRG.22969(--)	K04707
Human Diseases	Cancers	Chronic myeloid leukemia	1	49	0.27455	0.670595	ko05220	MSTRG.22969(--)	K04707
Metabolism	Glycan biosynthesis and metabolism	N-Glycan biosynthesis	1	50	0.279305	0.670595	ko00510	MSTRG.14666(Stt3a)	K07151
Human Diseases	Drug resistance	Antifolate resistance	1	52	0.288724	0.670595	ko01523	Sfur010345(abcG23)	K05665
Metabolism	Glycan biosynthesis and metabolism	Various types of N-glycan biosynthesis	1	56	0.307202	0.670595	ko00513	MSTRG.14666(Stt3a)	K07151
Human Diseases	Infectious diseases	Bacterial invasion of epithelial cells	1	58	0.316264	0.670595	ko05100	MSTRG.22969(--)	K04707
Organismal Systems	Endocrine system	Regulation of lipolysis in adipocyte	1	60	0.325211	0.670595	ko04923	MSTRG.4305(--)	K07376
Human Diseases	Cancers	Small cell lung cancer	1	61	0.329641	0.670595	ko05222	MSTRG.33770(--)	K06237
Environmental Information Processing	Signal transduction	Sphingolipid signaling pathway	1	69	0.364077	0.670595	ko04071	Sfur010345(abcG23)	K05665
Cellular Processes	Transport and catabolism	Mitophagy - animal	1	70	0.368258	0.670595	ko04137	MSTRG.24264(BNIP3)	K15464
Human Diseases	Endocrine and metabolic diseases	AGE-RAGE signaling pathway in diabetic complications	1	71	0.372412	0.670595	ko04933	MSTRG.33770(--)	K06237
Organismal Systems	Digestive system	Cholesterol metabolism	1	72	0.376539	0.670595	ko04979	Sfur000881(Lip1)	K01052
Human Diseases	Infectious diseases	Shigellosis	2	201	0.377836	0.670595	ko05131	Sfur013517(ATG16L1);MSTRG.24264(BNIP3)	K17890+K15464
Human Diseases	Substance dependence	Morphine addiction	1	73	0.380641	0.670595	ko05032	Sfur010067(pde-5)	K18438
Human Diseases	Infectious diseases	Amoebiasis	1	75	0.388764	0.670595	ko05146	MSTRG.33770(--)	K06237
Metabolism	Xenobiotics biodegradation and metabolism	Drug metabolism - other enzymes	1	76	0.392786	0.670595	ko00983	Sfur009957(Upp1)	K00757
Environmental Information Processing	Signal transduction	cAMP signaling pathway	2	209	0.396525	0.670595	ko04024	Sfur007675(Gpr161);Sfur010067(pde-5)	K04145+K18438
Organismal Systems	Digestive system	Vitamin digestion and absorption	1	77	0.396783	0.670595	ko04977	Sfur010345(abcG23)	K05665
Human Diseases	Infectious diseases	Influenza A	1	77	0.396783	0.670595	ko05164	MSTRG.33278(--)	K14297
Environmental Information Processing	Signaling molecules and interaction	ECM-receptor interaction	1	79	0.4047	0.670595	ko04512	MSTRG.33770(--)	K06237
Environmental Information Processing	Membrane transport	ABC transporters	1	82	0.416385	0.670595	ko02010	Sfur010345(abcG23)	K05665
Organismal Systems	Environmental adaptation	Circadian entrainment	1	84	0.42405	0.670595	ko04713	MSTRG.4305(--)	K07376
Metabolism	Amino acid metabolism	Lysine degradation	1	85	0.427846	0.670595	ko00310	Sfur006776(ASH1L)	K06101
Environmental Information Processing	Signal transduction	FoxO signaling pathway	1	85	0.427846	0.670595	ko04068	MSTRG.24264(BNIP3)	K15464
Cellular Processes	Cell growth and death	Apoptosis	1	87	0.435364	0.670595	ko04210	MSTRG.24261(TUBA4A)	K07374
Metabolism	Carbohydrate metabolism	Amino sugar and nucleotide sugar metabolism	1	89	0.442786	0.670595	ko00520	Sfur001481(Oacyl)	K01183
Organismal Systems	Immune system	NOD-like receptor signaling pathway	1	89	0.442786	0.670595	ko04621	Sfur013517(ATG16L1)	K17890
Human Diseases	Substance dependence	Alcoholism	1	93	0.457345	0.670595	ko05034	Sfur007675(Gpr161)	K04145
Organismal Systems	Digestive system	Salivary secretion	1	94	0.460926	0.670595	ko04970	MSTRG.4305(--)	K07376
Human Diseases	Neurodegenerative diseases	Alzheimer disease	3	388	0.466802	0.670595	ko05010	Sfur005841(RB1CC1);Sfur008091(RB1CC1);MSTRG.24261(TUBA4A)	K17589+K17589+K07374
Cellular Processes	Transport and catabolism	Autophagy - other eukaryotes	1	96	0.468019	0.670595	ko04136	Sfur013517(ATG16L1)	K17890
Metabolism	Global and overview maps	Fatty acid metabolism	1	100	0.481934	0.675279	ko01212	Sfur005767(ACAA2)	K07508
Organismal Systems	Endocrine system	Relaxin signaling pathway	1	101	0.485357	0.675279	ko04926	MSTRG.33770(--)	K06237
Genetic Information Processing	Translation	RNA transport	2	259	0.507036	0.690102	ko03013	Sfur007299(--);MSTRG.33278(--)	K07936+K14297
Cellular Processes	Transport and catabolism	Peroxisome	1	114	0.527894	0.690102	ko04146	Sfur000712(PEX11G)	K13353
Organismal Systems	Circulatory system	Vascular smooth muscle contraction	1	115	0.53102	0.690102	ko04270	MSTRG.4305(--)	K07376
Genetic Information Processing	Translation	Ribosome biogenesis in eukaryotes	1	118	0.540277	0.690102	ko03008	Sfur007299(--)	K07936
Human Diseases	Infectious diseases	Pathogenic Escherichia coli infection	1	122	0.552344	0.690102	ko05130	MSTRG.24261(TUBA4A)	K07374
Human Diseases	Cancers	MicroRNAs in cancer	1	122	0.552344	0.690102	ko05206	Sfur010345(abcG23)	K05665
Human Diseases	Cancers	Pathways in cancer	2	285	0.559363	0.690102	ko05200	MSTRG.22969(--);MSTRG.33770(--)	K04707+K06237
Environmental Information Processing	Signal transduction	Ras signaling pathway	1	126	0.5641	0.690102	ko04014	MSTRG.28015(dl)	K09254
Genetic Information Processing	Folding, sorting and degradation	Ubiquitin mediated proteolysis	1	129	0.57272	0.690102	ko04120	MSTRG.22969(--)	K04707
Cellular Processes	Cellular community - eukaryotes	Tight junction	1	129	0.57272	0.690102	ko04530	MSTRG.24261(TUBA4A)	K07374
Organismal Systems	Endocrine system	Insulin signaling pathway	1	133	0.583953	0.690102	ko04910	MSTRG.22969(--)	K04707
Human Diseases	Cancers	Viral carcinogenesis	1	133	0.583953	0.690102	ko05203	MSTRG.28015(dl)	K09254
Cellular Processes	Transport and catabolism	Phagosome	1	135	0.589462	0.690102	ko04145	MSTRG.24261(TUBA4A)	K07374
Human Diseases	Cancers	Proteoglycans in cancer	1	145	0.615953	0.693589	ko05205	MSTRG.22969(--)	K04707
Environmental Information Processing	Signal transduction	cGMP - PKG signaling pathway	1	148	0.62357	0.693589	ko04022	MSTRG.4305(--)	K07376
Environmental Information Processing	Signal transduction	Rap1 signaling pathway	1	150	0.628565	0.693589	ko04015	Sfur007675(Gpr161)	K04145
Cellular Processes	Cellular community - eukaryotes	Focal adhesion	1	150	0.628565	0.693589	ko04510	MSTRG.33770(--)	K06237
Human Diseases	Infectious diseases	HTLV-I infection	1	150	0.628565	0.693589	ko05166	Sfur007299(--)	K07936
Environmental Information Processing	Signal transduction	Calcium signaling pathway	1	159	0.650256	0.708898	ko04020	Sfur000156(--)	K16059
Genetic Information Processing	Folding, sorting and degradation	Protein processing in endoplasmic reticulum	1	162	0.657208	0.708898	ko04141	MSTRG.14666(Stt3a)	K07151
Environmental Information Processing	Signaling molecules and interaction	Neuroactive ligand-receptor interaction	1	177	0.689992	0.72644	ko04080	Sfur007675(Gpr161)	K04145
Cellular Processes	Transport and catabolism	Endocytosis	1	179	0.694125	0.72644	ko04144	MSTRG.22969(--)	K04707
Environmental Information Processing	Signal transduction	PI3K-Akt signaling pathway	1	180	0.696172	0.72644	ko04151	MSTRG.33770(--)	K06237
Human Diseases	Neurodegenerative diseases	Parkinson disease	1	199	0.732607	0.756239	ko05012	Sfur007675(Gpr161)	K04145
Human Diseases	Infectious diseases	Human papillomavirus infection	1	225	0.775633	0.792135	ko05165	MSTRG.33770(--)	K06237
Human Diseases	Infectious diseases	Herpes simplex infection	1	240	0.797298	0.805691	ko05168	Sfur006946(--)	K09228
Organismal Systems	Environmental adaptation	Thermogenesis	1	285	0.850752	0.850752	ko04714	MSTRG.4305(--)	K07376
Trans
KEGG_A_class	KEGG_B_class	Pathway	trans (1115)	All (6457)	Pvalue	Qvalue	Pathway ID	Genes	K_IDs
Metabolism	Global and overview maps	Metabolic pathways	390	1615	1.46911e-16	4.90682e-14	ko01100	Sfur000047(AAEL008004);Sfur000110(Ppt2);Sfur000111(Arsb);Sfur000157(HAO1);Sfur000193(Pnliprp2);Sfur000207(HMGCS1);Sfur000240(HADHB);Sfur000252(Mal-B2);Sfur000262(Nnt);Sfur000268(AAEL008004);Sfur000273(AAEL008004);Sfur000300(Gmer);Sfur000301(AAEL008004);Sfur000315(Acy1);Sfur000330(D11DS);Sfur000337(AAEL008004);Sfur000343(Alg9);Sfur000347(NNT);Sfur000372(CTH);Sfur000398(PNLIPRP2);Sfur000400(AAEL008…	K10250+K01074+K01135+K11517+K14073+K01641+K07509+K01187+K00323+K10250+K10250+K02377+K10250+K14677+K00507+K10250+K03846+K00323+K01758+K14073+K10250+K00602+K00873+K03103+K01672+K01047+K00669+K01988+K22203+K22203+K05285+K16860+K05607+K03331+K03331+K18123+K00161+K22203+K11140+K02154+K01077+K01183+K13485+K11153+K00011+K01183+K00453+K18081+K01183+K02152+K00669+K01183+K16816+K10250+K10249+K01183+K01183+…
Metabolism	Carbohydrate metabolism	Amino sugar and nucleotide sugar metabolism	42	89	4.96947e-11	5.66488e-09	ko00520	Sfur000300(Gmer);Sfur001067(--);Sfur001356(nrf-6);Sfur001372(--);Sfur001403(nrf-6);Sfur001481(Oacyl);Sfur001520(CHIA);Sfur001556(--);Sfur001650(Oscillin);Sfur001670(fdl);Sfur001692(--);Sfur002041(Pgi);Sfur002233(HK1);Sfur004784(Gfpt2);Sfur006684(nrf-6);Sfur006894(Gnpnat);Sfur007226(--);Sfur007883(rhy-1);Sfur008450(Chia);Sfur008452(Chia);Sfur008604(chs-2);Sfur010701(Gmd);Sfur011128(Gnpnat);Sfur011…	K02377+K01183+K01183+K01183+K01183+K01183+K01183+K01183+K02564+K12373+K01183+K01810+K00844+K00820+K01183+K00621+K01183+K01183+K01183+K01183+K00698+K01711+K00621+K01183+K08678+K01836+K15779+K01183+K01183+K01809+K01183+K01183+K00963+K01183+K01183+K00963+K01183+K01183+K01183+K00844+K00844+K02377
Metabolism	Lipid metabolism	Fatty acid elongation	26	41	5.08821e-11	5.66488e-09	ko00062	Sfur000047(AAEL008004);Sfur000110(Ppt2);Sfur000240(HADHB);Sfur000268(AAEL008004);Sfur000273(AAEL008004);Sfur000301(AAEL008004);Sfur000337(AAEL008004);Sfur000400(AAEL008004);Sfur001418(AAEL008004);Sfur001468(ELOVL4);Sfur002072(Ppt1);Sfur002488(Elovl7);Sfur002746(Hsd17b12);Sfur005244(ELOVL);Sfur005767(ACAA2);Sfur006731(ELOVL4);Sfur007538(hsd17b12);Sfur011462(Elovl1);Sfur011701(AAEL008004);Sfur01191…	K10250+K01074+K07509+K10250+K10250+K10250+K10250+K10250+K10250+K10249+K01074+K10250+K10251+K10247+K07508+K10249+K10251+K10249+K10250+K10250+K10250+K10249+K10250+K10250+K07508+K10250
Metabolism	Global and overview maps	Fatty acid metabolism	39	100	1.72573e-07	1.38861e-05	ko01212	Sfur000047(AAEL008004);Sfur000110(Ppt2);Sfur000240(HADHB);Sfur000268(AAEL008004);Sfur000273(AAEL008004);Sfur000301(AAEL008004);Sfur000330(D11DS);Sfur000337(AAEL008004);Sfur000400(AAEL008004);Sfur001418(AAEL008004);Sfur001468(ELOVL4);Sfur002072(Ppt1);Sfur002488(Elovl7);Sfur002528(Fasn);Sfur002746(Hsd17b12);Sfur005215(ACADS);Sfur005244(ELOVL);Sfur005767(ACAA2);Sfur006731(ELOVL4);Sfur007463(FASN);Sf…	K10250+K01074+K07509+K10250+K10250+K10250+K00507+K10250+K10250+K10250+K10249+K01074+K10250+K00665+K10251+K00248+K10247+K07508+K10249+K00665+K10251+K11262+K08765+K10249+K10250+K10250+K10250+K00507+K00665+K01897+K00507+K00507+K00507+K00507+K10249+K10250+K10250+K07508+K10250
Metabolism	Lipid metabolism	Biosynthesis of unsaturated fatty acids	27	58	2.07876e-07	1.38861e-05	ko01040	Sfur000047(AAEL008004);Sfur000268(AAEL008004);Sfur000273(AAEL008004);Sfur000301(AAEL008004);Sfur000330(D11DS);Sfur000337(AAEL008004);Sfur000400(AAEL008004);Sfur001418(AAEL008004);Sfur001468(ELOVL4);Sfur002488(Elovl7);Sfur002746(Hsd17b12);Sfur005244(ELOVL);Sfur006731(ELOVL4);Sfur007538(hsd17b12);Sfur011462(Elovl1);Sfur011701(AAEL008004);Sfur011911(ELOVL4);Sfur012302(ELOVL7);Sfur012424(D11DS);Sfur0…	K10250+K10250+K10250+K10250+K00507+K10250+K10250+K10250+K10249+K10250+K10251+K10247+K10249+K10251+K10249+K10250+K10250+K10250+K00507+K00507+K00507+K00507+K00507+K10249+K10250+K10250+K10250
Metabolism	Carbohydrate metabolism	Fructose and mannose metabolism	17	32	4.0021e-06	0.000222784	ko00051	Sfur000300(Gmer);Sfur001205(AKR1B1);Sfur002233(HK1);Sfur010701(Gmd);Sfur011572(enosf1);Sfur012384(Sord);Sfur012647(Pfkfb1);Sfur013438(Pfk);Sfur014564(MPI);Sfur015008(TKFC);Sfur015029(Ald1);Sfur015056(TKFC);Sfur015261(aldo-2);MSTRG.12820(ALDOB);MSTRG.25617(Hex-t2);MSTRG.3014(Hex-t2);MSTRG.613(TSTA3)	K02377+K00011+K00844+K01711+K18334+K00008+K01103+K00850+K01809+K00863+K01623+K00863+K01623+K01623+K00844+K00844+K02377
Metabolism	Lipid metabolism	Fatty acid degradation	23	54	1.07152e-05	0.00051127	ko00071	Sfur000240(HADHB);Sfur002897(Eci2);Sfur005215(ACADS);Sfur005767(ACAA2);Sfur005894(ACP21);Sfur005937(--);Sfur005967(ACP20);Sfur005972(ACP20);Sfur006039(Ccp84Ab);Sfur006062(ACP20);Sfur006128(ACP21);Sfur006176(ACP21);Sfur010046(CPT1B);Sfur012982(Acsl1);Sfur013135(Aldh2);Sfur014404(ACP21);Sfur014594(Ccp84Ab);Sfur014800(ACP21);Sfur015119(Edg84A);Sfur015256(Edg84A);Sfur015309(ACP21);MSTRG.15727(ACAA2);…	K07509+K13239+K00248+K07508+K13238+K13238+K13238+K13238+K13238+K13238+K13238+K13238+K08765+K01897+K00128+K13238+K13238+K13238+K13238+K13238+K13238+K07508+K00128
Metabolism	Lipid metabolism	Glycerolipid metabolism	29	79	2.57407e-05	0.00107468	ko00561	Sfur000193(Pnliprp2);Sfur000398(PNLIPRP2);Sfur001205(AKR1B1);Sfur001415(Pnpla2);Sfur001643(NAGA);Sfur002309(AKR1B8);Sfur002850(PNLIP);Sfur002974(PNLIP);Sfur003019(--);Sfur003979(PNLIPRP2);Sfur004571(--);Sfur009497(DGAT1);Sfur010070(Lip1);Sfur011683(MFSD10);Sfur011918(--);Sfur012970(GPAM);Sfur013135(Aldh2);Sfur013672(LCLAT1);Sfur013911(PNLIP);Sfur014127(Lpin1);Sfur014230(Pnliprp1);Sfur014232(Pnlip…	K14073+K14073+K00011+K16816+K01189+K00002+K14076+K14073+K14075+K14073+K01080+K11155+K14452+K13506+K16816+K00629+K00128+K13513+K14073+K15728+K14073+K14073+K13509+K14073+K00863+K00863+K14074+K14074+K00128
Metabolism	Metabolism of terpenoids and polyketides	Insect hormone biosynthesis	18	41	5.99711e-05	0.00222559	ko00981	Sfur000511(--);Sfur001410(Est-6);Sfur001442(Ces2e);Sfur001475(Est-6);Sfur001617(Est-6);Sfur002078(jhamt);Sfur003828(phm);Sfur010134(EH2);Sfur010575(Cyp305a1);Sfur010874(Cyp303a1);Sfur011561(spo);Sfur012080(daf-36);Sfur013053(Dhrs11);Sfur013135(Aldh2);Sfur013403(DHRS11);Sfur014254(spo);MSTRG.22713(SAR2567);MSTRG.5712(aldA)	K15825+K01063+K01063+K01063+K01063+K10718+K10720+K10719+K14937+K14937+K14939+K14938+K15890+K00128+K15890+K14939+K15890+K00128
Genetic Information Processing	Folding, sorting and degradation	Protein export	14	28	6.994e-05	0.002336	ko03060	Sfur000867(SEC11A);Sfur000897(Srp19);Sfur001681(Spase22-23);Sfur005985(Sec63);Sfur005994(SEC61G);Sfur006380(SEC61A2);Sfur008193(spcs2);Sfur008961(SEC61B);Sfur009184(spcs2);Sfur009255(ZK512.4);Sfur011421(SRP72);Sfur012613(mblac1);MSTRG.34003(Hsc70-3);MSTRG.34004(Hsc70-3)	K13280+K03105+K12948+K09540+K07342+K10956+K12947+K09481+K12947+K03109+K03108+K12946+K09490+K09490
Genetic Information Processing	Replication and repair	DNA replication	19	46	0.000103356	0.00313827	ko03030	Sfur000070(pola1);Sfur000071(Mcm7);Sfur000145(Mcm7);Sfur002315(dpa);Sfur003256(Rfc5);Sfur003370(lig1);Sfur005462(RpA-70);Sfur005880(PCNA);Sfur008184(DNApol-delta);Sfur008486(DNApol-alpha60);Sfur009691(DNApol-delta);Sfur010285(POLE3);Sfur011216(Pole);Sfur011647(Mcm5);Sfur013773(Mcm3);Sfur015063(Mcm2);MSTRG.27247(Fen1);MSTRG.9032(Mcm6);MSTRG.9036(Mcm6)	K02320+K02210+K02210+K02212+K10756+K10747+K07466+K04802+K02327+K02685+K02327+K02326+K02324+K02209+K02541+K02540+K04799+K02542+K02542
Organismal Systems	Digestive system	Fat digestion and absorption	24	65	0.000113612	0.00316221	ko04975	Sfur000193(Pnliprp2);Sfur000398(PNLIPRP2);Sfur000526(--);Sfur001001(SCARB1);Sfur002974(PNLIP);Sfur003019(--);Sfur003100(pes);Sfur003362(--);Sfur003517(--);Sfur003979(PNLIPRP2);Sfur004571(--);Sfur005842(pes);Sfur007895(SCARB2);Sfur009497(DGAT1);Sfur010070(Lip1);Sfur013162(mttp);Sfur013911(PNLIP);Sfur014230(Pnliprp1);Sfur014232(Pnliprp1);Sfur014704(AGPAT1);Sfur014832(Lipg);MSTRG.28763(PNLIPRP1);MST…	K14073+K14073+K01047+K13885+K14073+K14075+K13885+K01047+K13885+K14073+K01080+K13885+K13885+K11155+K14452+K14463+K14073+K14073+K14073+K13509+K14073+K14074+K14074+K13885
Genetic Information Processing	Folding, sorting and degradation	Protein processing in endoplasmic reticulum	46	162	0.000254054	0.00652725	ko04141	Sfur000209(Uggt);Sfur000302(Hsp90b1);Sfur000392(Hsp90b1);Sfur000419(Calr);Sfur001151(PDIA3);Sfur001369(Plaa);Sfur001421(SSR3);Sfur002132(SSR1);Sfur002558(Pdi);Sfur003703(At1g06840);Sfur004863(SEC24C);Sfur004918(PRKCSH);Sfur005031(Dad1);Sfur005057(DERL1);Sfur005571(Ssr2);Sfur005584(RLBP1);Sfur005985(Sec63);Sfur005994(SEC61G);Sfur006371(hyou1);Sfur006380(SEC61A2);Sfur006701(--);Sfur006786(TTPAL);Sf…	K11718+K09487+K09487+K08057+K08056+K14018+K13251+K13249+K09580+K08852+K14007+K08288+K12668+K11519+K13250+K09586+K09540+K07342+K09486+K10956+K09586+K09586+K11718+K09586+K09586+K10080+K12666+K09481+K05546+K07151+K04571+K01228+K14005+K09584+K12667+K13984+K14010+K12666+K09054+K09054+K07151+K11718+K03283+K09490+K09490+K09586
Cellular Processes	Transport and catabolism	Peroxisome	35	114	0.000274675	0.00655296	ko04146	Sfur000157(HAO1);Sfur000712(PEX11G);Sfur001025(wat);Sfur001691(Pex16);Sfur001994(--);Sfur002862(Far1);Sfur002897(Eci2);Sfur003182(SOD1);Sfur004002(Jafrac1);Sfur004407(XDH);Sfur004749(PEX11A);Sfur004988(XDH1);Sfur006354(Jafrac1);Sfur006389(wat);Sfur006756(CG5065);Sfur006772(wat);Sfur006951(CG5065);Sfur006953(CG8306);Sfur007701(Jafrac1);Sfur007726(CG5065);Sfur008342(wat);Sfur008351(wat);Sfur008657(…	K11517+K13353+K13356+K13335+K13356+K13356+K13239+K04565+K13279+K00106+K13352+K00106+K13279+K13356+K13356+K13356+K13356+K13356+K13279+K13356+K13356+K13356+K01796+K00106+K13356+K05940+K03781+K13356+K05676+K13356+K01640+K00031+K01897+K00106+K00106
Metabolism	Metabolism of other amino acids	Glutathione metabolism	21	57	0.000311138	0.00670268	ko00480	Sfur000935(Trhde);Sfur002601(RnrS);Sfur003730(Ggt1);Sfur005336(GstS1);Sfur005404(Rrm1);Sfur005578(Gpx6);Sfur005641(LAP3);Sfur006110(lap3);Sfur006841(PTGES);Sfur008774(LAP3);Sfur009105(LAP3);Sfur012117(--);Sfur012202(Ggt7);Sfur012644(lap3);Sfur012700(Idh1);Sfur014216(GST1);Sfur014260(lap3);Sfur014763(lap3);MSTRG.13171(GGCT);MSTRG.27383(se);MSTRG.35605(ANPEP)	K11140+K10808+K18592+K04097+K10807+K00432+K11142+K11142+K00799+K11142+K11142+K11140+K00681+K11142+K00031+K00799+K11142+K11142+K00682+K00310+K11140
Organismal Systems	Digestive system	Vitamin digestion and absorption	26	77	0.000321087	0.00670268	ko04977	Sfur000193(Pnliprp2);Sfur000398(PNLIPRP2);Sfur001001(SCARB1);Sfur002974(PNLIP);Sfur003100(pes);Sfur003517(--);Sfur003979(PNLIPRP2);Sfur004713(PLB1);Sfur005328(SLC46A1);Sfur005329(PLB1);Sfur005568(PLB1);Sfur005842(pes);Sfur007895(SCARB2);Sfur009985(abcG23);Sfur010215(abcG23);Sfur010345(abcG23);Sfur010548(abcG23);Sfur010905(abcG23);Sfur011825(vanin-like);Sfur011914(ABCC1);Sfur012519(abcG23);Sfur013…	K14073+K14073+K13885+K14073+K13885+K13885+K14073+K14621+K14613+K14621+K14621+K13885+K13885+K05665+K05665+K05665+K05665+K05665+K01435+K05665+K05665+K14073+K14073+K14073+K14073+K13885
Metabolism	Biosynthesis of other secondary metabolites	Caffeine metabolism	6	8	0.000534046	0.0104924	ko00232	Sfur004407(XDH);Sfur004988(XDH1);Sfur008990(xdh);Sfur009447(Uro);Sfur012994(ry);Sfur013874(XDH)	K00106+K00106+K00106+K00365+K00106+K00106
Organismal Systems	Digestive system	Protein digestion and absorption	35	121	0.000935952	0.0170362	ko04974	Sfur000630(--);Sfur001806(Slc16a10);Sfur002888(Slc8a1);Sfur003547(nas-13);Sfur003704(--);Sfur003875(--);Sfur005392(--);Sfur005554(Cpb2);Sfur006111(--);Sfur006971(Agrn);Sfur008572(path);Sfur008762(--);Sfur008892(--);Sfur009405(DPP4);Sfur009434(DERP3);Sfur010066(path);Sfur010342(path);Sfur010661(Mdga2);Sfur010786(CG1139);Sfur011699(CTRB1);Sfur012186(thetaTry);Sfur012500(CPA1);Sfur013121(ARB_03789);…	K06237+K08187+K05849+K08606+K19721+K19720+K19720+K01298+K06237+K06238+K14209+K19720+K19720+K01278+K01312+K14209+K14209+K08606+K14209+K01310+K01312+K01298+K01298+K19720+K13781+K08187+K08187+K19720+K06237+K19720+K14209+K05849+K14209+K14209+K06237
Metabolism	Carbohydrate metabolism	Pentose phosphate pathway	15	38	0.00097003	0.0170362	ko00030	Sfur002041(Pgi);Sfur006611(rgn);Sfur006937(LMJF_27_0420);Sfur007062(Gld);Sfur007447(Gld);Sfur012802(rgn);Sfur013192(yvrE);Sfur013438(Pfk);Sfur014064(PGM2);Sfur015029(Ald1);Sfur015203(rgn);Sfur015261(aldo-2);MSTRG.12820(ALDOB);MSTRG.38392(Gld);MSTRG.38393(Gld)	K01810+K01053+K00852+K00115+K00115+K01053+K01053+K00850+K15779+K01623+K01053+K01623+K01623+K00115+K00115
Cellular Processes	Transport and catabolism	Phagosome	38	135	0.00102013	0.0170362	ko04145	Sfur000269(alphaTub84B);Sfur000419(Calr);Sfur000616(TUBB4B);Sfur000619(Dhc64C);Sfur001001(SCARB1);Sfur001004(atp6v0a1);Sfur001376(--);Sfur001869(Act5C);Sfur002272(alphaTub84B);Sfur002673(TUBB4B);Sfur002696(alphaTub84B);Sfur003100(pes);Sfur003517(--);Sfur005046(betaTub60D);Sfur005842(pes);Sfur005885(cfaD);Sfur005994(SEC61G);Sfur006056(--);Sfur006380(SEC61A2);Sfur006579(PGBD2);Sfur007895(SCARB2);Sf…	K07374+K08057+K07375+K10413+K13885+K02154+K02152+K05692+K07374+K07375+K07374+K13885+K13885+K07375+K13885+K01365+K07342+K00914+K10956+K00914+K13885+K09481+K03661+K00914+K02146+K07374+K07374+K10413+K00914+K02146+K00914+K00914+K02150+K01365+K01365+K01365+K07374+K13885
Metabolism	Xenobiotics biodegradation and metabolism	Drug metabolism - other enzymes	24	76	0.00157163	0.0238897	ko00983	Sfur001309(Est-5C);Sfur001505(BCHE);Sfur001698(--);Sfur002601(RnrS);Sfur003192(Ugt2b1);Sfur003369(Ugt2b1);Sfur004407(XDH);Sfur004988(XDH1);Sfur005404(Rrm1);Sfur006841(PTGES);Sfur007449(DPYS);Sfur008990(xdh);Sfur009957(Upp1);Sfur010320(Ugt1a2);Sfur010670(awd);Sfur011317(Ugt1a8);Sfur011404(UGT2B10);Sfur012994(ry);Sfur013874(XDH);Sfur013921(ras);Sfur014200(DUT);Sfur014216(GST1);MSTRG.36688(UPP2);MST…	K01044+K03927+K00699+K10808+K00699+K00699+K00106+K00106+K10807+K00799+K01464+K00106+K00757+K00699+K00940+K00699+K00699+K00106+K00106+K00088+K01520+K00799+K00757+K00699
Metabolism	Carbohydrate metabolism	Glycolysis / Gluconeogenesis	23	72	0.0016451	0.0238897	ko00010	Sfur000483(PKLR);Sfur000490(--);Sfur000898(T05H10.6);Sfur002041(Pgi);Sfur002233(HK1);Sfur002309(AKR1B8);Sfur005279(YMR099C);Sfur005488(PGK1);Sfur006735(pgk-1);Sfur008187(GAPDH);Sfur008511(PyK);Sfur008676(Mipp1);Sfur013135(Aldh2);Sfur013438(Pfk);Sfur013548(PDHB);Sfur014064(PGM2);Sfur015029(Ald1);Sfur015261(aldo-2);MSTRG.12820(ALDOB);MSTRG.13192(mro);MSTRG.25617(Hex-t2);MSTRG.3014(Hex-t2);MSTRG.571…	K00873+K03103+K00161+K01810+K00844+K00002+K01792+K00927+K00927+K00134+K00873+K03103+K00128+K00850+K00162+K15779+K01623+K01623+K01623+K01785+K00844+K00844+K00128
Organismal Systems	Digestive system	Cholesterol metabolism	23	72	0.0016451	0.0238897	ko04979	Sfur000881(Lip1);Sfur001001(SCARB1);Sfur001590(Lip1);Sfur002002(--);Sfur002482(--);Sfur002672(Lrp2);Sfur003100(pes);Sfur003517(--);Sfur003906(Lip1);Sfur003909(--);Sfur004150(Ptchd3);Sfur005842(pes);Sfur006300(Lip1);Sfur006408(NT1);Sfur007288(LRP1);Sfur007895(SCARB2);Sfur010427(Lip3);Sfur010830(Lip3);Sfur012938(Ldlrap1);Sfur013509(Tspo);Sfur013903(--);MSTRG.35966(Lip1);MSTRG.8996(--)	K01052+K13885+K01052+K06233+K00637+K06233+K13885+K13885+K01052+K01052+K12385+K13885+K01052+K01052+K04550+K13885+K01052+K01052+K12474+K05770+K22290+K01052+K13885
Organismal Systems	Immune system	Complement and coagulation cascades	13	33	0.00213962	0.0297763	ko04610	Sfur002145(PPAF2);Sfur004229(Eppin);Sfur007267(Klkb1);Sfur007344(flz);Sfur008378(--);Sfur011321(mas);Sfur011836(mas);Sfur013522(flz);MSTRG.36866(F10);MSTRG.36868(OVCH2);MSTRG.4940(Tmprss11c);MSTRG.4941(ST14);MSTRG.5486(F10)	K01344+K03909+K01324+K01324+K01324+K01324+K01324+K01324+K01324+K01324+K01321+K01321+K01324
Metabolism	Carbohydrate metabolism	Galactose metabolism	14	37	0.00229048	0.0306008	ko00052	Sfur000252(Mal-B2);Sfur001205(AKR1B1);Sfur001643(NAGA);Sfur002233(HK1);Sfur006887(Glb1);Sfur013438(Pfk);Sfur014064(PGM2);Sfur014743(UGP2);Sfur015411(Ugp2);MSTRG.13192(mro);MSTRG.25617(Hex-t2);MSTRG.3014(Hex-t2);MSTRG.30284(Gaa);MSTRG.3233(SI)	K01187+K00011+K01189+K00844+K12309+K00850+K15779+K00963+K00963+K01785+K00844+K00844+K12316+K12316
Metabolism	Global and overview maps	Biosynthesis of amino acids	23	74	0.00246072	0.0316108	ko01230	Sfur000315(Acy1);Sfur000372(CTH);Sfur000483(PKLR);Sfur001848(ASNS);Sfur002180(GPT);Sfur002616(gpt2l);Sfur004874(PSPH);Sfur005488(PGK1);Sfur006735(pgk-1);Sfur007376(tdcB);Sfur008187(GAPDH);Sfur008511(PyK);Sfur009701(AAEL002956);Sfur010718(Gs2);Sfur011283(Aldh18a1);Sfur011418(Aco1);Sfur012700(Idh1);Sfur013438(Pfk);Sfur013726(IDH1);Sfur014454(arg1);Sfur015029(Ald1);Sfur015261(aldo-2);MSTRG.12820(ALD…	K14677+K01758+K00873+K01953+K00814+K00814+K01079+K00927+K00927+K01754+K00134+K00873+K01647+K01915+K12657+K01681+K00031+K00850+K00030+K00611+K01623+K01623+K01623
Metabolism	Glycan biosynthesis and metabolism	Glycosaminoglycan degradation	12	30	0.00270687	0.033485	ko00531	Sfur000111(Arsb);Sfur001670(fdl);Sfur004459(SGSH);Sfur005197(Hgsnat);Sfur006887(Glb1);Sfur008174(Arsb);Sfur008374(ARSJ);Sfur009020(Arsb);Sfur009100(Arsb);Sfur009114(ARSI);Sfur010398(NAGLU);Sfur012780(HPSE)	K01135+K12373+K01565+K10532+K12309+K01135+K01135+K01135+K01135+K01135+K01205+K07964
Organismal Systems	Sensory system	Phototransduction	6	11	0.00549285	0.0634569	ko04744	Sfur001961(--);Sfur005723(TpnC41C);Sfur009374(CNGB1);Sfur012073(CALML4);Sfur012532(TpnC41C);Sfur013596(TpnC41C)	K04952+K02183+K04952+K02183+K02183+K02183
Metabolism	Lipid metabolism	Glycerophospholipid metabolism	22	74	0.00550973	0.0634569	ko00564	Sfur000526(--);Sfur000531(mboat7);Sfur000649(Gpdh);Sfur000808(PLD3);Sfur003362(--);Sfur004571(--);Sfur004713(PLB1);Sfur004887(ETNPPL);Sfur005053(Taz);Sfur005329(PLB1);Sfur005568(PLB1);Sfur006218(CHKB);Sfur008634(--);Sfur008914(GPD2);Sfur010714(Pis);Sfur011683(MFSD10);Sfur012970(GPAM);Sfur013672(LCLAT1);Sfur014127(Lpin1);Sfur014704(AGPAT1);MSTRG.13341(eas);MSTRG.13342(eas)	K01047+K13516+K00006+K16860+K01047+K01080+K14621+K14286+K13511+K14621+K14621+K14156+K01049+K00111+K00999+K13506+K00629+K13513+K15728+K13509+K00894+K00894
Cellular Processes	Transport and catabolism	Lysosome	45	182	0.00616711	0.0686605	ko04142	Sfur000028(GD10667);Sfur000110(Ppt2);Sfur000111(Arsb);Sfur000424(CG17119);Sfur000881(Lip1);Sfur001004(atp6v0a1);Sfur001590(Lip1);Sfur001643(NAGA);Sfur001670(fdl);Sfur002072(Ppt1);Sfur002836(Sumf1);Sfur003756(slc17a8);Sfur003819(Cd63);Sfur003906(Lip1);Sfur003909(--);Sfur004150(Ptchd3);Sfur004459(SGSH);Sfur005197(Hgsnat);Sfur005885(cfaD);Sfur006300(Lip1);Sfur006408(NT1);Sfur006887(Glb1);Sfur007067(…	K01444+K01074+K01135+K12386+K01052+K02154+K01052+K01189+K12373+K01074+K13444+K12301+K06497+K01052+K01052+K12385+K01565+K10532+K01365+K01052+K01052+K12309+K01363+K01135+K01135+K12389+K01135+K01135+K01135+K03661+K19363+K01205+K01052+K01052+K02146+K12311+K12350+K02146+K21398+K01365+K01365+K01365+K12316+K12316+K01052
Environmental Information Processing	Signal transduction	HIF-1 signaling pathway	22	76	0.00776595	0.0836719	ko04066	Sfur000898(T05H10.6);Sfur001378(--);Sfur001537(ELOC);Sfur001629(--);Sfur002233(HK1);Sfur003765(--);Sfur005488(PGK1);Sfur006427(InR);Sfur006735(pgk-1);Sfur007922(TEK);Sfur008187(GAPDH);Sfur010434(fgt-1);Sfur012647(Pfkfb1);Sfur013438(Pfk);Sfur013548(PDHB);Sfur015029(Ald1);Sfur015261(aldo-2);MSTRG.12820(ALDOB);MSTRG.14814(SLC2A3);MSTRG.14815(SLC2A3);MSTRG.25617(Hex-t2);MSTRG.3014(Hex-t2)	K00161+K05459+K03872+K04526+K00844+K07299+K00927+K04527+K00927+K05121+K00134+K07299+K01103+K00850+K00162+K01623+K01623+K01623+K07299+K07299+K00844+K00844
Metabolism	Lipid metabolism	Linoleic acid metabolism	5	9	0.01039	0.106956	ko00591	Sfur000526(--);Sfur003362(--);Sfur004713(PLB1);Sfur005329(PLB1);Sfur005568(PLB1)	K01047+K01047+K14621+K14621+K14621
Cellular Processes	Cell growth and death	Apoptosis	24	87	0.0105675	0.106956	ko04210	Sfur000269(alphaTub84B);Sfur001652(alpha-Spec);Sfur001869(Act5C);Sfur002272(alphaTub84B);Sfur002696(alphaTub84B);Sfur003548(SEPTIN4);Sfur003703(At1g06840);Sfur005096(Cwf19l1);Sfur005283(JUN);Sfur005342(--);Sfur005885(cfaD);Sfur007067(TINAGL1);Sfur009752(BIRC6);Sfur009965(Itpr);Sfur011784(TUBA8);Sfur011930(tba-2);Sfur013136(PTPN13);Sfur014179(ATM);Sfur014606(--);Sfur014756(Cp1);Sfur014816(Cp1);Sfu…	K07374+K06114+K05692+K07374+K07374+K16943+K08852+K04467+K04448+K04402+K01365+K01363+K08731+K04958+K07374+K07374+K02374+K04728+K02308+K01365+K01365+K01365+K07374+K04958
Human Diseases	Substance dependence	Amphetamine addiction	19	65	0.0115237	0.113204	ko05031	Sfur000422(SLC18B1);Sfur003099(grin2b);Sfur003132(DAT);Sfur003329(--);Sfur003666(unc-64);Sfur004029(ppp1cc-a);Sfur004157(ppp1cc-a);Sfur005283(JUN);Sfur005723(TpnC41C);Sfur008504(Pka-C1);Sfur009057(AAEL010734);Sfur010310(ple);Sfur012073(CALML4);Sfur012397(CAMK4);Sfur012532(TpnC41C);Sfur013596(TpnC41C);Sfur014303(SLC18A2);MSTRG.37219(Creb3l4);MSTRG.37220(Creb3l4)	K08155+K05210+K05036+K04560+K04560+K06269+K06269+K04448+K02183+K04345+K01593+K00501+K02183+K05869+K02183+K02183+K08155+K09048+K09048
Metabolism	Metabolism of cofactors and vitamins	Pantothenate and CoA biosynthesis	7	16	0.0121241	0.115698	ko00770	Sfur001899(CSAD);Sfur007449(DPYS);Sfur008975(Dcakd);Sfur011355(gadl1);MSTRG.24153(PANK1);MSTRG.24156(PANK1);MSTRG.24157(PANK1)	K18966+K01464+K00859+K18966+K09680+K09680+K09680
Metabolism	Carbohydrate metabolism	Ascorbate and aldarate metabolism	15	48	0.0125287	0.116238	ko00053	Sfur001698(--);Sfur003192(Ugt2b1);Sfur003201(LCC5);Sfur003369(Ugt2b1);Sfur006611(rgn);Sfur010320(Ugt1a2);Sfur011317(Ugt1a8);Sfur011404(UGT2B10);Sfur012802(rgn);Sfur013135(Aldh2);Sfur013192(yvrE);Sfur013637(miox);Sfur015203(rgn);MSTRG.5712(aldA);MSTRG.7920(UGT2B18)	K00699+K00699+K00423+K00699+K01053+K00699+K00699+K00699+K01053+K00128+K01053+K00469+K01053+K00128+K00699
Organismal Systems	Endocrine system	Ovarian Steroidogenesis	14	44	0.0132188	0.119326	ko04913	Sfur001001(SCARB1);Sfur001378(--);Sfur001629(--);Sfur003100(pes);Sfur003517(--);Sfur004109(ADCY9);Sfur005842(pes);Sfur006427(InR);Sfur007895(SCARB2);Sfur008504(Pka-C1);MSTRG.23721(ADCY9);MSTRG.23832(ADCY9);MSTRG.23839(ADCY9);MSTRG.8996(--)	K13885+K05459+K04526+K13885+K13885+K08049+K13885+K04527+K13885+K04345+K08049+K08049+K08049+K13885
Human Diseases	Infectious diseases	Vibrio cholerae infection	16	53	0.0142823	0.125534	ko05110	Sfur001004(atp6v0a1);Sfur001043(KdelR);Sfur001376(--);Sfur001869(Act5C);Sfur004109(ADCY9);Sfur005994(SEC61G);Sfur006380(SEC61A2);Sfur008504(Pka-C1);Sfur008961(SEC61B);Sfur009516(ATP6V0B);Sfur011405(VhaAC39-1);Sfur013642(ATP6V0D1);Sfur014686(Atp6v1e2);MSTRG.23721(ADCY9);MSTRG.23832(ADCY9);MSTRG.23839(ADCY9)	K02154+K10949+K02152+K05692+K08049+K07342+K10956+K04345+K09481+K03661+K02146+K02146+K02150+K08049+K08049+K08049
Metabolism	Lipid metabolism	Arachidonic acid metabolism	10	28	0.0148532	0.127204	ko00590	Sfur000526(--);Sfur003362(--);Sfur003730(Ggt1);Sfur004713(PLB1);Sfur005108(LTA4H);Sfur005329(PLB1);Sfur005336(GstS1);Sfur005568(PLB1);Sfur005578(Gpx6);Sfur008930(Cbr3)	K01047+K01047+K18592+K14621+K01254+K14621+K04097+K14621+K00432+K00079
Metabolism	Carbohydrate metabolism	Starch and sucrose metabolism	13	41	0.017163	0.136968	ko00500	Sfur000252(Mal-B2);Sfur002027(TPS1);Sfur002041(Pgi);Sfur002233(HK1);Sfur005185(Gyg1);Sfur011156(tpsA);Sfur014064(PGM2);Sfur014743(UGP2);Sfur015411(Ugp2);MSTRG.25617(Hex-t2);MSTRG.3014(Hex-t2);MSTRG.30284(Gaa);MSTRG.3233(SI)	K01187+K16055+K01810+K00844+K00750+K16055+K15779+K00963+K00963+K00844+K00844+K12316+K12316
Organismal Systems	Sensory system	Olfactory transduction	13	41	0.017163	0.136968	ko04740	Sfur001961(--);Sfur002888(Slc8a1);Sfur005723(TpnC41C);Sfur008428(SLC24A4);Sfur008504(Pka-C1);Sfur008966(SLC24A3);Sfur009374(CNGB1);Sfur009822(--);Sfur012073(CALML4);Sfur012532(TpnC41C);Sfur013596(TpnC41C);MSTRG.24009(SLC8A1);MSTRG.4305(--)	K04952+K05849+K02183+K13752+K04345+K13752+K04952+K19477+K02183+K02183+K02183+K05849+K07376
Metabolism	Biosynthesis of other secondary metabolites	Neomycin, kanamycin and gentamicin biosynthesis	3	4	0.017895	0.136968	ko00524	Sfur002233(HK1);MSTRG.25617(Hex-t2);MSTRG.3014(Hex-t2)	K00844+K00844+K00844
Human Diseases	Immune diseases	Rheumatoid arthritis	12	37	0.0180282	0.136968	ko05323	Sfur001004(atp6v0a1);Sfur001376(--);Sfur005283(JUN);Sfur005885(cfaD);Sfur007922(TEK);Sfur009516(ATP6V0B);Sfur011405(VhaAC39-1);Sfur013642(ATP6V0D1);Sfur014686(Atp6v1e2);Sfur014756(Cp1);Sfur014816(Cp1);Sfur014836(Cp1)	K02154+K02152+K04448+K01365+K05121+K03661+K02146+K02146+K02150+K01365+K01365+K01365
Metabolism	Glycan biosynthesis and metabolism	N-Glycan biosynthesis	15	50	0.0184142	0.136968	ko00510	Sfur000343(Alg9);Sfur004835(CG8399);Sfur005031(Dad1);Sfur007830(CG10166);Sfur007924(RPN1);Sfur008226(DOLPP1);Sfur009153(wol);Sfur009790(Ganab);Sfur011285(Stt3b);Sfur011854(Mogs);Sfur012400(GGH);Sfur013406(RPN2);Sfur014350(RPN1);Sfur015190(ALG2);MSTRG.14666(Stt3a)	K03846+K03843+K12668+K00721+K12666+K07252+K00729+K05546+K07151+K01228+K03842+K12667+K12666+K03843+K07151
Metabolism	Amino acid metabolism	Tyrosine metabolism	11	33	0.0187558	0.136968	ko00350	Sfur000602(y);Sfur000706(MRJP1);Sfur000923(y);Sfur004822(tdc-1);Sfur007050(y);Sfur007942(Fah);Sfur009057(AAEL010734);Sfur009253(y);Sfur010310(ple);Sfur013161(hgo);Sfur014316(CG5235)	K22203+K22203+K22203+K22329+K22203+K01555+K01593+K22203+K00501+K00451+K00503
Organismal Systems	Endocrine system	Thyroid hormone synthesis	17	59	0.0188639	0.136968	ko04918	Sfur000302(Hsp90b1);Sfur000392(Hsp90b1);Sfur002002(--);Sfur002672(Lrp2);Sfur004109(ADCY9);Sfur005578(Gpx6);Sfur008504(Pka-C1);Sfur008764(Iyd);Sfur009965(Itpr);MSTRG.23721(ADCY9);MSTRG.23832(ADCY9);MSTRG.23839(ADCY9);MSTRG.34003(Hsc70-3);MSTRG.34004(Hsc70-3);MSTRG.37219(Creb3l4);MSTRG.37220(Creb3l4);MSTRG.38817(Itpr)	K09487+K09487+K06233+K06233+K08049+K00432+K04345+K17231+K04958+K08049+K08049+K08049+K09490+K09490+K09048+K09048+K04958
Metabolism	Carbohydrate metabolism	Pentose and glucuronate interconversions	14	46	0.0197241	0.137928	ko00040	Sfur000821(DCXR);Sfur000852(DCXR);Sfur001205(AKR1B1);Sfur001698(--);Sfur002309(AKR1B8);Sfur003192(Ugt2b1);Sfur003369(Ugt2b1);Sfur010320(Ugt1a2);Sfur011317(Ugt1a8);Sfur011404(UGT2B10);Sfur012384(Sord);Sfur014743(UGP2);Sfur015411(Ugp2);MSTRG.7920(UGT2B18)	K03331+K03331+K00011+K00699+K00002+K00699+K00699+K00699+K00699+K00699+K00008+K00963+K00963+K00699
Organismal Systems	Endocrine system	Relaxin signaling pathway	26	101	0.0198219	0.137928	ko04926	Sfur000630(--);Sfur001362(--);Sfur001428(--);Sfur002202(Src64B);Sfur002492(--);Sfur002767(Src64B);Sfur003875(--);Sfur004109(ADCY9);Sfur005283(JUN);Sfur005392(--);Sfur006111(--);Sfur006377(Dlish);Sfur008504(Pka-C1);Sfur008762(--);Sfur008892(--);Sfur013478(--);Sfur014872(--);Sfur015094(RXFP2);Sfur015140(--);Sfur015366(--);MSTRG.23721(ADCY9);MSTRG.23832(ADCY9);MSTRG.23839(ADCY9);MSTRG.33770(--);MSTR…	K06237+K17447+K05449+K05704+K04307+K05704+K19720+K08049+K04448+K19720+K06237+K04364+K04345+K19720+K19720+K19720+K19720+K04307+K06237+K19720+K08049+K08049+K08049+K06237+K09048+K09048
Metabolism	Lipid metabolism	Steroid hormone biosynthesis	11	34	0.0235235	0.160344	ko00140	Sfur001698(--);Sfur002082(LST);Sfur002746(Hsd17b12);Sfur003192(Ugt2b1);Sfur003369(Ugt2b1);Sfur005907(LST);Sfur007538(hsd17b12);Sfur010320(Ugt1a2);Sfur011317(Ugt1a8);Sfur011404(UGT2B10);MSTRG.7920(UGT2B18)	K00699+K01016+K10251+K00699+K00699+K01016+K10251+K00699+K00699+K00699+K00699
Metabolism	Global and overview maps	2-Oxocarboxylic acid metabolism	7	18	0.0246012	0.164336	ko01210	Sfur000315(Acy1);Sfur002180(GPT);Sfur002616(gpt2l);Sfur009701(AAEL002956);Sfur011418(Aco1);Sfur012700(Idh1);Sfur013726(IDH1)	K14677+K00814+K00814+K01647+K01681+K00031+K00030
Cellular Processes	Cell growth and death	Cell cycle	29	118	0.0266122	0.174284	ko04110	Sfur000038(BUB1);Sfur000071(Mcm7);Sfur000095(polo);Sfur000145(Mcm7);Sfur000380(--);Sfur001474(Anapc4);Sfur002315(dpa);Sfur003374(--);Sfur003408(Mad2l1);Sfur004627(Stag1);Sfur005342(--);Sfur005415(CycE);Sfur005880(PCNA);Sfur006367(ANAPC1);Sfur006447(cdk20);Sfur008514(Orc1);Sfur009036(plk1);Sfur009486(CDC6);Sfur010875(Cdc14a);Sfur011647(Mcm5);Sfur012148(plk1);Sfur013773(Mcm3);Sfur014179(ATM);Sfur01…	K02178+K02210+K06631+K02210+K03875+K03351+K02212+K02365+K02537+K06671+K04402+K06626+K04802+K03348+K02202+K02603+K06631+K02213+K06639+K02209+K06631+K02541+K04728+K08866+K02540+K02605+K06636+K02542+K02542
Organismal Systems	Aging	Longevity regulating pathway - mammal	21	80	0.0277302	0.178113	ko04211	Sfur001378(--);Sfur001530(--);Sfur001629(--);Sfur004109(ADCY9);Sfur004946(Sesn);Sfur005716(PAQR3);Sfur005841(RB1CC1);Sfur006427(InR);Sfur007641(--);Sfur007741(CAMKK1);Sfur008091(RB1CC1);Sfur008504(Pka-C1);Sfur009994(cat);Sfur012397(CAMK4);Sfur015249(Ehmt2);MSTRG.23721(ADCY9);MSTRG.23832(ADCY9);MSTRG.23839(ADCY9);MSTRG.37219(Creb3l4);MSTRG.37220(Creb3l4);MSTRG.7349(Rheb)	K05459+K16184+K04526+K08049+K10141+K07297+K17589+K04527+K07359+K07359+K17589+K04345+K03781+K05869+K11420+K08049+K08049+K08049+K09048+K09048+K07208
Genetic Information Processing	Replication and repair	Base excision repair	11	35	0.0291168	0.183491	ko03410	Sfur003370(lig1);Sfur005880(PCNA);Sfur008184(DNApol-delta);Sfur009691(DNApol-delta);Sfur010285(POLE3);Sfur011216(Pole);Sfur012031(smug1);Sfur012496(Ung);Sfur015092(Rrp1);MSTRG.27247(Fen1);MSTRG.33856(Ogg1)	K10747+K04802+K02327+K02327+K02326+K02324+K10800+K03648+K10771+K04799+K03660
Metabolism	Amino acid metabolism	Glycine, serine and threonine metabolism	10	31	0.0307831	0.190399	ko00260	Sfur000372(CTH);Sfur002093(AGXT2);Sfur004874(PSPH);Sfur007136(Gld);Sfur007376(tdcB);Sfur007481(Gld);Sfur007844(Gld);Sfur011342(Gld);MSTRG.24865(Gld);MSTRG.25015(Gld)	K01758+K00827+K01079+K00108+K01754+K00108+K00108+K00108+K00108+K00108
Human Diseases	Cancers	Central carbon metabolism in cancer	16	58	0.0331064	0.197553	ko05230	Sfur000483(PKLR);Sfur000898(T05H10.6);Sfur002233(HK1);Sfur003765(--);Sfur006284(fend);Sfur006413(fend);Sfur008260(Slc7a5);Sfur008511(PyK);Sfur010434(fgt-1);Sfur012045(Sirt3);Sfur013438(Pfk);Sfur013548(PDHB);MSTRG.14814(SLC2A3);MSTRG.14815(SLC2A3);MSTRG.25617(Hex-t2);MSTRG.3014(Hex-t2)	K00873+K00161+K00844+K07299+K05126+K05126+K13780+K00873+K07299+K11413+K00850+K00162+K07299+K07299+K00844+K00844
Organismal Systems	Endocrine system	Adipocytokine signaling pathway	12	40	0.0331227	0.197553	ko04920	Sfur003765(--);Sfur005096(Cwf19l1);Sfur005716(PAQR3);Sfur007641(--);Sfur007741(CAMKK1);Sfur008253(Ptpn11);Sfur008731(RXR);Sfur010046(CPT1B);Sfur010434(fgt-1);Sfur012982(Acsl1);MSTRG.14814(SLC2A3);MSTRG.14815(SLC2A3)	K07299+K04467+K07297+K07359+K07359+K07293+K08524+K08765+K07299+K01897+K07299+K07299
Organismal Systems	Immune system	Antigen processing and presentation	11	36	0.0356012	0.20861	ko04612	Sfur000419(Calr);Sfur001151(PDIA3);Sfur005885(cfaD);Sfur007067(TINAGL1);Sfur010354(GILT1);Sfur010772(ifi30);Sfur012583(ifi30);Sfur014756(Cp1);Sfur014816(Cp1);Sfur014836(Cp1);MSTRG.32397(Hspa2)	K08057+K08056+K01365+K01363+K08059+K08059+K08059+K01365+K01365+K01365+K03283
Metabolism	Nucleotide metabolism	Pyrimidine metabolism	13	45	0.0365902	0.210709	ko00240	Sfur002569(PNP);Sfur002601(RnrS);Sfur004945(AK9);Sfur005404(Rrm1);Sfur007449(DPYS);Sfur009957(Upp1);Sfur010670(awd);Sfur012203(ZEU1);Sfur013292(nt5dc3);Sfur014200(DUT);MSTRG.13082(UPRT);MSTRG.13338(Tyms);MSTRG.36688(UPP2)	K03783+K10808+K18533+K10807+K01464+K00757+K00940+K00943+K01081+K01520+K00761+K00560+K00757
Cellular Processes	Cellular community - eukaryotes	Gap junction	22	88	0.0412638	0.233595	ko04540	Sfur000269(alphaTub84B);Sfur000616(TUBB4B);Sfur002202(Src64B);Sfur002272(alphaTub84B);Sfur002673(TUBB4B);Sfur002696(alphaTub84B);Sfur002767(Src64B);Sfur004109(ADCY9);Sfur005046(betaTub60D);Sfur006377(Dlish);Sfur007675(Gpr161);Sfur008504(Pka-C1);Sfur009822(--);Sfur009965(Itpr);Sfur011784(TUBA8);Sfur011930(tba-2);MSTRG.23721(ADCY9);MSTRG.23832(ADCY9);MSTRG.23839(ADCY9);MSTRG.24261(TUBA4A);MSTRG.388…	K07374+K07375+K05704+K07374+K07375+K07374+K05704+K08049+K07375+K04364+K04145+K04345+K19477+K04958+K07374+K07374+K08049+K08049+K08049+K07374+K04958+K07376
Organismal Systems	Aging	Longevity regulating pathway - worm	27	113	0.0437554	0.243572	ko04212	Sfur000330(D11DS);Sfur001025(wat);Sfur001994(--);Sfur002862(Far1);Sfur004996(to);Sfur006389(wat);Sfur006427(InR);Sfur006756(CG5065);Sfur006772(wat);Sfur006841(PTGES);Sfur006951(CG5065);Sfur006953(CG8306);Sfur007726(CG5065);Sfur007793(Hcfc1);Sfur008342(wat);Sfur008351(wat);Sfur009043(CG5065);Sfur009994(cat);Sfur010174(CG5065);Sfur012080(daf-36);Sfur012257(wat);Sfur012424(D11DS);Sfur013200(Scd4);Sf…	K00507+K13356+K13356+K13356+K17794+K13356+K04527+K13356+K13356+K00799+K13356+K13356+K13356+K14966+K13356+K13356+K13356+K03781+K13356+K14938+K13356+K00507+K00507+K00507+K00507+K00507+K00799
Human Diseases	Infectious diseases	Amoebiasis	19	75	0.0489618	0.267051	ko05146	Sfur000630(--);Sfur003875(--);Sfur004002(Jafrac1);Sfur005392(--);Sfur006111(--);Sfur006354(Jafrac1);Sfur007701(Jafrac1);Sfur008504(Pka-C1);Sfur008762(--);Sfur008892(--);Sfur010406(SERPINB13);Sfur010462(LanB2);Sfur013478(--);Sfur013897(Serpini1);Sfur014604(SERPINB1);Sfur014872(--);Sfur015140(--);Sfur015366(--);MSTRG.33770(--)	K06237+K19720+K13279+K19720+K06237+K13279+K13279+K04345+K19720+K19720+K13963+K05635+K19720+K13963+K13963+K19720+K06237+K19720+K06237
Metabolism	Lipid metabolism	Steroid biosynthesis	11	38	0.0514722	0.267051	ko00100	Sfur000881(Lip1);Sfur001590(Lip1);Sfur002482(--);Sfur003906(Lip1);Sfur003909(--);Sfur006300(Lip1);Sfur006408(NT1);Sfur010427(Lip3);Sfur010830(Lip3);Sfur014861(DWF5);MSTRG.35966(Lip1)	K01052+K01052+K00637+K01052+K01052+K01052+K01052+K01052+K01052+K00213+K01052
Metabolism	Xenobiotics biodegradation and metabolism	Metabolism of xenobiotics by cytochrome P450	11	38	0.0514722	0.267051	ko00980	Sfur001698(--);Sfur003192(Ugt2b1);Sfur003369(Ugt2b1);Sfur005336(GstS1);Sfur006841(PTGES);Sfur008930(Cbr3);Sfur010320(Ugt1a2);Sfur011317(Ugt1a8);Sfur011404(UGT2B10);Sfur014216(GST1);MSTRG.7920(UGT2B18)	K00699+K00699+K00699+K04097+K00799+K00079+K00699+K00699+K00699+K00799+K00699
Organismal Systems	Excretory system	Vasopressin-regulated water reabsorption	11	38	0.0514722	0.267051	ko04962	Sfur000619(Dhc64C);Sfur001116(ctp);Sfur004109(ADCY9);Sfur004159(DCTN2-p50);Sfur008504(Pka-C1);Sfur012839(Dhc64C);MSTRG.23721(ADCY9);MSTRG.23832(ADCY9);MSTRG.23839(ADCY9);MSTRG.37219(Creb3l4);MSTRG.37220(Creb3l4)	K10413+K10418+K08049+K10424+K04345+K10413+K08049+K08049+K08049+K09048+K09048
Cellular Processes	Cell growth and death	Oocyte meiosis	25	105	0.0528326	0.267051	ko04114	Sfur000038(BUB1);Sfur000095(polo);Sfur001378(--);Sfur001474(Anapc4);Sfur001629(--);Sfur003374(--);Sfur003408(Mad2l1);Sfur004029(ppp1cc-a);Sfur004109(ADCY9);Sfur004157(ppp1cc-a);Sfur005415(CycE);Sfur005723(TpnC41C);Sfur006367(ANAPC1);Sfur008504(Pka-C1);Sfur009036(plk1);Sfur009965(Itpr);Sfur012073(CALML4);Sfur012148(plk1);Sfur012532(TpnC41C);Sfur013596(TpnC41C);MSTRG.23721(ADCY9);MSTRG.23832(ADCY9)…	K02178+K06631+K05459+K03351+K04526+K02365+K02537+K06269+K08049+K06269+K06626+K02183+K03348+K04345+K06631+K04958+K02183+K06631+K02183+K02183+K08049+K08049+K08049+K06636+K04958
Genetic Information Processing	Replication and repair	Mismatch repair	8	25	0.0533147	0.267051	ko03430	Sfur003256(Rfc5);Sfur003370(lig1);Sfur005462(RpA-70);Sfur005880(PCNA);Sfur008184(DNApol-delta);Sfur009691(DNApol-delta);Sfur014494(tos);Sfur015216(MSH2)	K10756+K10747+K07466+K04802+K02327+K02327+K10746+K08735
Metabolism	Amino acid metabolism	Arginine and proline metabolism	14	52	0.0535702	0.267051	ko00330	Sfur000870(hoga1);Sfur005064(anon-37Cs);Sfur005641(LAP3);Sfur006110(lap3);Sfur008774(LAP3);Sfur009105(LAP3);Sfur009780(Smox);Sfur010190(CNDP2);Sfur011283(Aldh18a1);Sfur012644(lap3);Sfur013135(Aldh2);Sfur014260(lap3);Sfur014763(lap3);MSTRG.5712(aldA)	K18123+K12259+K11142+K11142+K11142+K11142+K12259+K08660+K12657+K11142+K00128+K11142+K11142+K00128
Human Diseases	Cancers	Chemical carcinogenesis	12	43	0.0555853	0.273022	ko05204	Sfur001698(--);Sfur003192(Ugt2b1);Sfur003369(Ugt2b1);Sfur005336(GstS1);Sfur006841(PTGES);Sfur007032(--);Sfur008930(Cbr3);Sfur010320(Ugt1a2);Sfur011317(Ugt1a8);Sfur011404(UGT2B10);Sfur014216(GST1);MSTRG.7920(UGT2B18)	K00699+K00699+K00699+K04097+K00799+K04809+K00079+K00699+K00699+K00699+K00799+K00699
Metabolism	Lipid metabolism	alpha-Linolenic acid metabolism	5	13	0.0582148	0.278021	ko00592	Sfur000526(--);Sfur003362(--);Sfur004713(PLB1);Sfur005329(PLB1);Sfur005568(PLB1)	K01047+K01047+K14621+K14621+K14621
Metabolism	Amino acid metabolism	Arginine biosynthesis	6	17	0.0582679	0.278021	ko00220	Sfur000315(Acy1);Sfur002180(GPT);Sfur002616(gpt2l);Sfur010718(Gs2);Sfur012934(Gdh);Sfur014454(arg1)	K14677+K00814+K00814+K01915+K00261+K00611
Metabolism	Nucleotide metabolism	Purine metabolism	32	142	0.0620412	0.291856	ko00230	Sfur000471(ATIC);Sfur000483(PKLR);Sfur001132(urad);Sfur001743(pde-5);Sfur002569(PNP);Sfur002601(RnrS);Sfur004109(ADCY9);Sfur004407(XDH);Sfur004945(AK9);Sfur004988(XDH1);Sfur005404(Rrm1);Sfur008511(PyK);Sfur008990(xdh);Sfur009447(Uro);Sfur010067(pde-5);Sfur010316(Pde7b);Sfur010670(awd);Sfur011670(AK7);Sfur012994(ry);Sfur013292(nt5dc3);Sfur013874(XDH);Sfur013921(ras);Sfur014064(PGM2);Sfur015338(PDE…	K00602+K00873+K13485+K18438+K03783+K10808+K08049+K00106+K18533+K00106+K10807+K00873+K00106+K00365+K18438+K13293+K00940+K00939+K00106+K01081+K00106+K00088+K15779+K18438+K00764+K00939+K01488+K13298+K08049+K08049+K08049+K01769
Organismal Systems	Digestive system	Pancreatic secretion	27	117	0.063831	0.293045	ko04972	Sfur000193(Pnliprp2);Sfur000398(PNLIPRP2);Sfur000526(--);Sfur002752(ATP2B1);Sfur002974(PNLIP);Sfur003019(--);Sfur003362(--);Sfur003979(PNLIPRP2);Sfur004109(ADCY9);Sfur005554(Cpb2);Sfur006653(IFRD2);Sfur009434(DERP3);Sfur009965(Itpr);Sfur011699(CTRB1);Sfur012186(thetaTry);Sfur012500(CPA1);Sfur013121(ARB_03789);Sfur013911(PNLIP);Sfur014230(Pnliprp1);Sfur014232(Pnliprp1);Sfur014832(Lipg);MSTRG.23721…	K14073+K14073+K01047+K05850+K14073+K14075+K01047+K14073+K08049+K01298+K13855+K01312+K04958+K01310+K01312+K01298+K01298+K14073+K14073+K14073+K14073+K08049+K08049+K08049+K14074+K14074+K04958
Environmental Information Processing	Signal transduction	AMPK signaling pathway	24	102	0.0640488	0.293045	ko04152	Sfur000330(D11DS);Sfur001378(--);Sfur001530(--);Sfur001629(--);Sfur002528(Fasn);Sfur005716(PAQR3);Sfur006427(InR);Sfur007463(FASN);Sfur007641(--);Sfur007714(ACAC);Sfur007741(CAMKK1);Sfur010046(CPT1B);Sfur012424(D11DS);Sfur012428(IQCA1);Sfur012647(Pfkfb1);Sfur013200(Scd4);Sfur013234(Scd1);Sfur013434(D11DS);Sfur013438(Pfk);Sfur013479(SCD5);Sfur015038(PPP2R3C);MSTRG.37219(Creb3l4);MSTRG.37220(Creb3l…	K00507+K05459+K16184+K04526+K00665+K07297+K04527+K00665+K07359+K11262+K07359+K08765+K00507+K00665+K01103+K00507+K00507+K00507+K00850+K00507+K11583+K09048+K09048+K07208
Metabolism	Lipid metabolism	Ether lipid metabolism	8	26	0.0658014	0.296996	ko00565	Sfur000526(--);Sfur000808(PLD3);Sfur001547(TMEM86A);Sfur003362(--);Sfur004571(--);Sfur004713(PLB1);Sfur005329(PLB1);Sfur005568(PLB1)	K01047+K16860+K18575+K01047+K01080+K14621+K14621+K14621
Human Diseases	Substance dependence	Alcoholism	22	93	0.0703512	0.313297	ko05034	Sfur000422(SLC18B1);Sfur001362(--);Sfur003099(grin2b);Sfur003132(DAT);Sfur004029(ppp1cc-a);Sfur004157(ppp1cc-a);Sfur005278(H2AZ2);Sfur005723(TpnC41C);Sfur006377(Dlish);Sfur007641(--);Sfur007675(Gpr161);Sfur007741(CAMKK1);Sfur008504(Pka-C1);Sfur009057(AAEL010734);Sfur010310(ple);Sfur012073(CALML4);Sfur012397(CAMK4);Sfur012532(TpnC41C);Sfur013596(TpnC41C);Sfur014303(SLC18A2);MSTRG.37219(Creb3l4);MS…	K08155+K17447+K05210+K05036+K06269+K06269+K11251+K02183+K04364+K07359+K04145+K07359+K04345+K01593+K00501+K02183+K05869+K02183+K02183+K08155+K09048+K09048
Human Diseases	Substance dependence	Cocaine addiction	11	40	0.0715083	0.31426	ko05030	Sfur000422(SLC18B1);Sfur003099(grin2b);Sfur003132(DAT);Sfur005283(JUN);Sfur007675(Gpr161);Sfur008504(Pka-C1);Sfur009057(AAEL010734);Sfur010310(ple);Sfur014303(SLC18A2);MSTRG.37219(Creb3l4);MSTRG.37220(Creb3l4)	K08155+K05210+K05036+K04448+K04145+K04345+K01593+K00501+K08155+K09048+K09048
Organismal Systems	Immune system	Platelet activation	25	109	0.0768873	0.333511	ko04611	Sfur000156(--);Sfur001371(MYLK);Sfur001869(Act5C);Sfur002202(Src64B);Sfur002767(Src64B);Sfur003875(--);Sfur004029(ppp1cc-a);Sfur004109(ADCY9);Sfur004157(ppp1cc-a);Sfur005392(--);Sfur008504(Pka-C1);Sfur008762(--);Sfur008892(--);Sfur009822(--);Sfur009965(Itpr);Sfur010114(sqh);Sfur013089(--);Sfur013478(--);Sfur014872(--);Sfur015366(--);MSTRG.23721(ADCY9);MSTRG.23832(ADCY9);MSTRG.23839(ADCY9);MSTRG.3…	K16059+K00907+K05692+K05704+K05704+K19720+K06269+K08049+K06269+K19720+K04345+K19720+K19720+K19477+K04958+K12757+K12757+K19720+K19720+K19720+K08049+K08049+K08049+K04958+K07376
Metabolism	Xenobiotics biodegradation and metabolism	Drug metabolism - cytochrome P450	10	36	0.0788032	0.337439	ko00982	Sfur001698(--);Sfur003192(Ugt2b1);Sfur003369(Ugt2b1);Sfur005336(GstS1);Sfur006841(PTGES);Sfur010320(Ugt1a2);Sfur011317(Ugt1a8);Sfur011404(UGT2B10);Sfur014216(GST1);MSTRG.7920(UGT2B18)	K00699+K00699+K00699+K04097+K00799+K00699+K00699+K00699+K00799+K00699
Human Diseases	Cardiovascular diseases	Fluid shear stress and atherosclerosis	20	85	0.0854035	0.361073	ko05418	Sfur000302(Hsp90b1);Sfur000392(Hsp90b1);Sfur001869(Act5C);Sfur002202(Src64B);Sfur002767(Src64B);Sfur005096(Cwf19l1);Sfur005283(JUN);Sfur005323(Mef2);Sfur005723(TpnC41C);Sfur005885(cfaD);Sfur006841(PTGES);Sfur007797(BMPR2);Sfur010101(sumo3l);Sfur012073(CALML4);Sfur012532(TpnC41C);Sfur013596(TpnC41C);Sfur014216(GST1);Sfur014756(Cp1);Sfur014816(Cp1);Sfur014836(Cp1)	K09487+K09487+K05692+K05704+K05704+K04467+K04448+K09260+K02183+K01365+K00799+K04671+K12160+K02183+K02183+K02183+K00799+K01365+K01365+K01365
Metabolism	Metabolism of cofactors and vitamins	Retinol metabolism	13	51	0.089036	0.371725	ko00830	Sfur001154(RDH13);Sfur001698(--);Sfur002859(--);Sfur003192(Ugt2b1);Sfur003369(Ugt2b1);Sfur003677(RDH14);Sfur003700(Hsd17b11);Sfur004885(HSD17B13);Sfur009497(DGAT1);Sfur010320(Ugt1a2);Sfur011317(Ugt1a8);Sfur011404(UGT2B10);MSTRG.7920(UGT2B18)	K11153+K00699+K15734+K00699+K00699+K11153+K15734+K15734+K11155+K00699+K00699+K00699+K00699
Organismal Systems	Nervous system	Synaptic vesicle cycle	17	71	0.093829	0.3869	ko04721	Sfur000422(SLC18B1);Sfur001004(atp6v0a1);Sfur001376(--);Sfur003132(DAT);Sfur003329(--);Sfur003666(unc-64);Sfur003989(LHT2);Sfur004248(AP2M1);Sfur009516(ATP6V0B);Sfur010314(LHT1);Sfur011405(VhaAC39-1);Sfur011654(--);Sfur013642(ATP6V0D1);Sfur013815(--);Sfur014303(SLC18A2);Sfur014686(Atp6v1e2);MSTRG.27167(--)	K08155+K02154+K02152+K05036+K04560+K04560+K15015+K11826+K03661+K15015+K02146+K05038+K02146+K05035+K08155+K02150+K15290
Human Diseases	Infectious diseases	Pathogenic Escherichia coli infection	27	122	0.0970573	0.395331	ko05130	Sfur000269(alphaTub84B);Sfur000616(TUBB4B);Sfur000804(--);Sfur000970(zip);Sfur001869(Act5C);Sfur002272(alphaTub84B);Sfur002555(arpc1a-b);Sfur002673(TUBB4B);Sfur002696(alphaTub84B);Sfur004463(Pdzd2);Sfur004863(SEC24C);Sfur005046(betaTub60D);Sfur005096(Cwf19l1);Sfur005283(JUN);Sfur005401(myo19);Sfur007457(arpc4);Sfur008187(GAPDH);Sfur008253(Ptpn11);Sfur008871(arpc5-b);Sfur011206(--);Sfur011781(bai)…	K07374+K07375+K10352+K10352+K05692+K07374+K05757+K07375+K07374+K10356+K14007+K07375+K04467+K04448+K10357+K05755+K00134+K07293+K05754+K12800+K20352+K07374+K07374+K03175+K23612+K10352+K07374
Human Diseases	Drug resistance	Antifolate resistance	13	52	0.100858	0.402302	ko01523	Sfur000117(l(2)03659);Sfur000471(ATIC);Sfur005096(Cwf19l1);Sfur005328(SLC46A1);Sfur009985(abcG23);Sfur010215(abcG23);Sfur010345(abcG23);Sfur010548(abcG23);Sfur010905(abcG23);Sfur011914(ABCC1);Sfur012519(abcG23);Sfur013469(abcC12);MSTRG.13338(Tyms)	K05673+K00602+K04467+K14613+K05665+K05665+K05665+K05665+K05665+K05665+K05665+K05668+K00560
Metabolism	Glycan biosynthesis and metabolism	Glycosaminoglycan biosynthesis - chondroitin sulfate / dermatan sulfate	5	15	0.101178	0.402302	ko00532	Sfur002175(pip);Sfur006715(CHSY1);Sfur007638(Chst11);Sfur007723(CHST11);Sfur009795(B3GALT6)	K03193+K13499+K01017+K01017+K00734
Metabolism	Metabolism of other amino acids	Taurine and hypotaurine metabolism	4	11	0.105942	0.406721	ko00430	Sfur001899(CSAD);Sfur003730(Ggt1);Sfur011355(gadl1);Sfur012202(Ggt7)	K18966+K18592+K18966+K00681
Metabolism	Glycan biosynthesis and metabolism	Mucin type O-glycan biosynthesis	4	11	0.105942	0.406721	ko00512	Sfur001931(Pgant7);Sfur002923(Pgant2);Sfur004148(--);Sfur012958(Pgant3)	K00710+K00710+K00731+K00710
Metabolism	Metabolism of cofactors and vitamins	One carbon pool by folate	4	11	0.105942	0.406721	ko00670	Sfur000471(ATIC);Sfur007782(ALDH1L2);Sfur012668(MTHFD2);MSTRG.13338(Tyms)	K00602+K00289+K13403+K00560
Organismal Systems	Endocrine system	Estrogen signaling pathway	22	98	0.111059	0.421519	ko04915	Sfur000302(Hsp90b1);Sfur000392(Hsp90b1);Sfur001362(--);Sfur001898(Gabbr1);Sfur002202(Src64B);Sfur002767(Src64B);Sfur004109(ADCY9);Sfur005283(JUN);Sfur005723(TpnC41C);Sfur006377(Dlish);Sfur008504(Pka-C1);Sfur009965(Itpr);Sfur012073(CALML4);Sfur012532(TpnC41C);Sfur013596(TpnC41C);MSTRG.23721(ADCY9);MSTRG.23832(ADCY9);MSTRG.23839(ADCY9);MSTRG.32397(Hspa2);MSTRG.37219(Creb3l4);MSTRG.37220(Creb3l4);MS…	K09487+K09487+K17447+K04615+K05704+K05704+K08049+K04448+K02183+K04364+K04345+K04958+K02183+K02183+K02183+K08049+K08049+K08049+K03283+K09048+K09048+K04958
Human Diseases	Infectious diseases	HTLV-I infection	32	150	0.112342	0.421597	ko05166	Sfur000141(--);Sfur000246(--);Sfur000349(to);Sfur000352(--);Sfur000387(anon-3B1.2);Sfur000393(to);Sfur000419(Calr);Sfur000901(--);Sfur001474(Anapc4);Sfur003374(--);Sfur003408(Mad2l1);Sfur003765(--);Sfur003977(to);Sfur004109(ADCY9);Sfur004410(FDPS);Sfur005096(Cwf19l1);Sfur005283(JUN);Sfur005415(CycE);Sfur006367(ANAPC1);Sfur007299(--);Sfur008504(Pka-C1);Sfur010434(fgt-1);Sfur010501(sesB);Sfur013509…	K07936+K07936+K07936+K07936+K07936+K07936+K08057+K07936+K03351+K02365+K02537+K07299+K07936+K08049+K00787+K04467+K04448+K06626+K03348+K07936+K04345+K07299+K05863+K05770+K04728+K07299+K07299+K08049+K08049+K08049+K09048+K09048
Organismal Systems	Endocrine system	Cortisol synthesis and secretion	15	63	0.11499	0.42674	ko04927	Sfur001001(SCARB1);Sfur003100(pes);Sfur003517(--);Sfur004109(ADCY9);Sfur005842(pes);Sfur007895(SCARB2);Sfur008504(Pka-C1);Sfur009965(Itpr);MSTRG.23721(ADCY9);MSTRG.23832(ADCY9);MSTRG.23839(ADCY9);MSTRG.37219(Creb3l4);MSTRG.37220(Creb3l4);MSTRG.38817(Itpr);MSTRG.8996(--)	K13885+K13885+K13885+K08049+K13885+K13885+K04345+K04958+K08049+K08049+K08049+K09048+K09048+K04958+K13885
Metabolism	Metabolism of other amino acids	beta-Alanine metabolism	9	35	0.136484	0.497587	ko00410	Sfur001899(CSAD);Sfur005064(anon-37Cs);Sfur005215(ACADS);Sfur007449(DPYS);Sfur009780(Smox);Sfur010190(CNDP2);Sfur011355(gadl1);Sfur013135(Aldh2);MSTRG.5712(aldA)	K18966+K12259+K00248+K01464+K12259+K08660+K18966+K00128+K00128
Organismal Systems	Endocrine system	Aldosterone synthesis and secretion	24	111	0.13706	0.497587	ko04925	Sfur001001(SCARB1);Sfur002752(ATP2B1);Sfur003100(pes);Sfur003517(--);Sfur004109(ADCY9);Sfur005723(TpnC41C);Sfur005842(pes);Sfur007718(Dagla);Sfur007783(--);Sfur007895(SCARB2);Sfur008504(Pka-C1);Sfur009965(Itpr);Sfur011476(PRKD3);Sfur012073(CALML4);Sfur012397(CAMK4);Sfur012532(TpnC41C);Sfur013596(TpnC41C);MSTRG.23721(ADCY9);MSTRG.23832(ADCY9);MSTRG.23839(ADCY9);MSTRG.37219(Creb3l4);MSTRG.37220(Cre…	K13885+K05850+K13885+K13885+K08049+K02183+K13885+K13806+K13806+K13885+K04345+K04958+K06070+K02183+K05869+K02183+K02183+K08049+K08049+K08049+K09048+K09048+K04958+K13885
Human Diseases	Infectious diseases	Staphylococcus aureus infection	2	4	0.140334	0.503994	ko05150	Sfur004533(--);Sfur007520(--)	K06496+K06496
Organismal Systems	Nervous system	Dopaminergic synapse	21	96	0.143469	0.509772	ko04728	Sfur000422(SLC18B1);Sfur002772(Clk);Sfur003099(grin2b);Sfur003132(DAT);Sfur004029(ppp1cc-a);Sfur004157(ppp1cc-a);Sfur005723(TpnC41C);Sfur007675(Gpr161);Sfur008504(Pka-C1);Sfur009057(AAEL010734);Sfur009965(Itpr);Sfur010310(ple);Sfur010797(Arntl);Sfur012073(CALML4);Sfur012532(TpnC41C);Sfur013596(TpnC41C);Sfur014303(SLC18A2);Sfur015038(PPP2R3C);MSTRG.37219(Creb3l4);MSTRG.37220(Creb3l4);MSTRG.38817(I…	K08155+K02223+K05210+K05036+K06269+K06269+K02183+K04145+K04345+K01593+K04958+K00501+K02296+K02183+K02183+K02183+K08155+K11583+K09048+K09048+K04958
Metabolism	Glycan biosynthesis and metabolism	Various types of N-glycan biosynthesis	13	56	0.157045	0.552137	ko00513	Sfur000343(Alg9);Sfur001670(fdl);Sfur001835(FucTA);Sfur004835(CG8399);Sfur005031(Dad1);Sfur007924(RPN1);Sfur011285(Stt3b);Sfur012400(GGH);Sfur013406(RPN2);Sfur014350(RPN1);Sfur014714(FucTA);Sfur015190(ALG2);MSTRG.14666(Stt3a)	K03846+K12373+K00753+K03843+K12668+K12666+K07151+K03842+K12667+K12666+K00753+K03843+K07151
Cellular Processes	Cellular community - eukaryotes	Tight junction	27	129	0.159833	0.552512	ko04530	Sfur000269(alphaTub84B);Sfur000804(--);Sfur000902(Mlc1);Sfur000970(zip);Sfur000982(l(2)gl);Sfur001236(Sym);Sfur001869(Act5C);Sfur002202(Src64B);Sfur002272(alphaTub84B);Sfur002696(alphaTub84B);Sfur002767(Src64B);Sfur005283(JUN);Sfur005880(PCNA);Sfur006256(SYMPK);Sfur008504(Pka-C1);Sfur009080(Mlc-c);Sfur010114(sqh);Sfur010699(At1g62600);Sfur011784(TUBA8);Sfur011930(tba-2);Sfur012596(RAP2C);Sfur0130…	K07374+K10352+K12751+K10352+K06094+K06100+K05692+K05704+K07374+K07374+K05704+K04448+K04802+K06100+K04345+K12751+K12757+K05631+K07374+K07374+K07839+K12757+K10352+K06091+K06100+K06100+K07374
Human Diseases	Cancers	Proteoglycans in cancer	30	145	0.16046	0.552512	ko05205	Sfur000219(FLNA);Sfur001378(--);Sfur001869(Act5C);Sfur001985(fz2);Sfur002202(Src64B);Sfur002767(Src64B);Sfur003710(DDB_G0271356);Sfur003731(PXN);Sfur003819(Cd63);Sfur004029(ppp1cc-a);Sfur004157(ppp1cc-a);Sfur004373(Iqgap1);Sfur004876(ptc);Sfur005596(Ank3);Sfur005885(cfaD);Sfur006377(Dlish);Sfur008253(Ptpn11);Sfur008451(CBLB);Sfur008504(Pka-C1);Sfur008550(Hspg2);Sfur009965(Itpr);Sfur012780(HPSE);S…	K04437+K05459+K05692+K02375+K05704+K05704+K05760+K05760+K06497+K06269+K06269+K16848+K06225+K10380+K01365+K04364+K07293+K04707+K04345+K06255+K04958+K07964+K02842+K01365+K01365+K01365+K04707+K12823+K12823+K04958
Organismal Systems	Endocrine system	GnRH signaling pathway	18	82	0.162413	0.553529	ko04912	Sfur000334(Mmp10);Sfur002202(Src64B);Sfur002767(Src64B);Sfur004109(ADCY9);Sfur005283(JUN);Sfur005618(GNRHR);Sfur005723(TpnC41C);Sfur006377(Dlish);Sfur008504(Pka-C1);Sfur009965(Itpr);Sfur012073(CALML4);Sfur012532(TpnC41C);Sfur013596(TpnC41C);MSTRG.14692(MMP14);MSTRG.23721(ADCY9);MSTRG.23832(ADCY9);MSTRG.23839(ADCY9);MSTRG.38817(Itpr)	K07763+K05704+K05704+K08049+K04448+K04280+K02183+K04364+K04345+K04958+K02183+K02183+K02183+K07763+K08049+K08049+K08049+K04958
Organismal Systems	Immune system	C-type lectin receptor signaling pathway	13	57	0.173217	0.579977	ko04625	Sfur001911(COLEC12);Sfur002202(Src64B);Sfur002767(Src64B);Sfur005096(Cwf19l1);Sfur005283(JUN);Sfur005723(TpnC41C);Sfur008253(Ptpn11);Sfur009965(Itpr);Sfur011206(--);Sfur012073(CALML4);Sfur012532(TpnC41C);Sfur013596(TpnC41C);MSTRG.38817(Itpr)	K10059+K05704+K05704+K04467+K04448+K02183+K07293+K04958+K12800+K02183+K02183+K02183+K04958
Metabolism	Glycan biosynthesis and metabolism	Glycosphingolipid biosynthesis - globo and isoglobo series	4	13	0.173646	0.579977	ko00603	Sfur000597(A4galt);Sfur001643(NAGA);Sfur001670(fdl);Sfur008590(Rbm45)	K01988+K01189+K12373+K00722
Metabolism	Amino acid metabolism	Valine, leucine and isoleucine degradation	11	47	0.175866	0.581577	ko00280	Sfur000207(HMGCS1);Sfur000240(HADHB);Sfur000815(AUH);Sfur002093(AGXT2);Sfur005215(ACADS);Sfur005767(ACAA2);Sfur012504(HMGCL);Sfur013135(Aldh2);Sfur014797(Dbt);MSTRG.15727(ACAA2);MSTRG.5712(aldA)	K01641+K07509+K05607+K00827+K00248+K07508+K01640+K00128+K09699+K07508+K00128
Organismal Systems	Endocrine system	Glucagon signaling pathway	21	99	0.179362	0.587323	ko04922	Sfur000483(PKLR);Sfur000898(T05H10.6);Sfur003765(--);Sfur005723(TpnC41C);Sfur006909(--);Sfur007714(ACAC);Sfur008504(Pka-C1);Sfur008511(PyK);Sfur009965(Itpr);Sfur010046(CPT1B);Sfur010434(fgt-1);Sfur012073(CALML4);Sfur012532(TpnC41C);Sfur013438(Pfk);Sfur013548(PDHB);Sfur013596(TpnC41C);MSTRG.14814(SLC2A3);MSTRG.14815(SLC2A3);MSTRG.37219(Creb3l4);MSTRG.37220(Creb3l4);MSTRG.38817(Itpr)	K00873+K00161+K07299+K02183+K07190+K11262+K04345+K00873+K04958+K08765+K07299+K02183+K02183+K00850+K00162+K02183+K07299+K07299+K09048+K09048+K04958
Metabolism	Energy metabolism	Nitrogen metabolism	5	18	0.18702	0.600623	ko00910	Sfur000504(cah-2);Sfur006538(Ca9);Sfur010718(Gs2);Sfur012934(Gdh);Sfur013045(bca-1)	K01672+K01672+K01915+K00261+K01673
Organismal Systems	Excretory system	Collecting duct acid secretion	5	18	0.18702	0.600623	ko04966	Sfur001004(atp6v0a1);Sfur001376(--);Sfur011405(VhaAC39-1);Sfur013642(ATP6V0D1);Sfur014686(Atp6v1e2)	K02154+K02152+K02146+K02146+K02150
Human Diseases	Infectious diseases	Bacterial invasion of epithelial cells	13	58	0.190175	0.604937	ko05100	Sfur001362(--);Sfur001869(Act5C);Sfur002202(Src64B);Sfur002555(arpc1a-b);Sfur002767(Src64B);Sfur003710(DDB_G0271356);Sfur003731(PXN);Sfur007457(arpc4);Sfur008451(CBLB);Sfur008871(arpc5-b);Sfur009889(Sep2);Sfur013846(--);MSTRG.22969(--)	K17447+K05692+K05704+K05757+K05704+K05760+K05760+K05755+K04707+K05754+K16939+K23612+K04707
Organismal Systems	Digestive system	Bile secretion	20	95	0.196239	0.617378	ko04976	Sfur000117(l(2)03659);Sfur001001(SCARB1);Sfur003100(pes);Sfur003517(--);Sfur003765(--);Sfur004109(ADCY9);Sfur005842(pes);Sfur006085(--);Sfur006194(--);Sfur006653(IFRD2);Sfur007895(SCARB2);Sfur008504(Pka-C1);Sfur008731(RXR);Sfur010434(fgt-1);MSTRG.14814(SLC2A3);MSTRG.14815(SLC2A3);MSTRG.23721(ADCY9);MSTRG.23832(ADCY9);MSTRG.23839(ADCY9);MSTRG.8996(--)	K05673+K13885+K13885+K13885+K07299+K08049+K13885+K14360+K14360+K13855+K13885+K04345+K08524+K07299+K07299+K07299+K08049+K08049+K08049+K13885
Metabolism	Glycan biosynthesis and metabolism	Other types of O-glycan biosynthesis	9	38	0.197783	0.617378	ko00514	Sfur001931(Pgant7);Sfur002923(Pgant2);Sfur004148(--);Sfur008588(Eogt);Sfur009196(rt);Sfur009558(POFUT2);Sfur010039(AGAP012208);Sfur012142(tw);Sfur012958(Pgant3)	K00710+K00710+K00731+K18134+K00728+K03691+K11703+K00728+K00710
Human Diseases	Immune diseases	Primary immunodeficiency	2	5	0.207881	0.63933	ko05340	Sfur012496(Ung);MSTRG.14605(--)	K03648+K01488
Organismal Systems	Sensory system	Inflammatory mediator regulation of TRP channels	17	80	0.208644	0.63933	ko04750	Sfur001378(--);Sfur002202(Src64B);Sfur002767(Src64B);Sfur004029(ppp1cc-a);Sfur004109(ADCY9);Sfur004157(ppp1cc-a);Sfur005723(TpnC41C);Sfur008504(Pka-C1);Sfur009965(Itpr);Sfur012073(CALML4);Sfur012532(TpnC41C);Sfur013596(TpnC41C);Sfur014776(pyx);MSTRG.23721(ADCY9);MSTRG.23832(ADCY9);MSTRG.23839(ADCY9);MSTRG.38817(Itpr)	K05459+K05704+K05704+K06269+K08049+K06269+K02183+K04345+K04958+K02183+K02183+K02183+K04984+K08049+K08049+K08049+K04958
Human Diseases	Infectious diseases	Epithelial cell signaling in Helicobacter pylori infection	11	49	0.21467	0.651815	ko05120	Sfur001004(atp6v0a1);Sfur001376(--);Sfur002202(Src64B);Sfur002767(Src64B);Sfur005096(Cwf19l1);Sfur005283(JUN);Sfur008253(Ptpn11);Sfur009516(ATP6V0B);Sfur011405(VhaAC39-1);Sfur013642(ATP6V0D1);Sfur014686(Atp6v1e2)	K02154+K02152+K05704+K05704+K04467+K04448+K07293+K03661+K02146+K02146+K02150
Human Diseases	Endocrine and metabolic diseases	Insulin resistance	18	86	0.21947	0.660387	ko04931	Sfur001629(--);Sfur002128(Lar);Sfur003765(--);Sfur004029(ppp1cc-a);Sfur004157(ppp1cc-a);Sfur004784(Gfpt2);Sfur006427(InR);Sfur007578(Slc27a4);Sfur008253(Ptpn11);Sfur010046(CPT1B);Sfur010278(hmces);Sfur010434(fgt-1);Sfur011478(PPP1R3C);MSTRG.14814(SLC2A3);MSTRG.14815(SLC2A3);MSTRG.37219(Creb3l4);MSTRG.37220(Creb3l4);MSTRG.976(--)	K04526+K05695+K07299+K06269+K06269+K00820+K04527+K08745+K07293+K08765+K05696+K07299+K07189+K07299+K07299+K09048+K09048+K17902
Metabolism	Amino acid metabolism	Alanine, aspartate and glutamate metabolism	8	34	0.22253	0.663615	ko00250	Sfur001848(ASNS);Sfur002093(AGXT2);Sfur002180(GPT);Sfur002616(gpt2l);Sfur004784(Gfpt2);Sfur010718(Gs2);Sfur012934(Gdh);Sfur015396(Prat)	K01953+K00827+K00814+K00814+K00820+K01915+K00261+K00764
Organismal Systems	Excretory system	Endocrine and other factor-regulated calcium reabsorption	11	50	0.235296	0.695476	ko04961	Sfur002752(ATP2B1);Sfur002888(Slc8a1);Sfur003173(PTH1R);Sfur003786(PTH1R);Sfur004109(ADCY9);Sfur004248(AP2M1);Sfur008504(Pka-C1);MSTRG.23721(ADCY9);MSTRG.23832(ADCY9);MSTRG.23839(ADCY9);MSTRG.24009(SLC8A1)	K05850+K05849+K04585+K04585+K08049+K11826+K04345+K08049+K08049+K08049+K05849
Metabolism	Lipid metabolism	Synthesis and degradation of ketone bodies	3	10	0.241634	0.695739	ko00072	Sfur000207(HMGCS1);Sfur006093(HSD11B2);Sfur012504(HMGCL)	K01641+K00019+K01640
Metabolism	Amino acid metabolism	Histidine metabolism	3	10	0.241634	0.695739	ko00340	Sfur010190(CNDP2);Sfur013135(Aldh2);MSTRG.5712(aldA)	K08660+K00128+K00128
Human Diseases	Infectious diseases	Malaria	3	10	0.241634	0.695739	ko05144	Sfur004533(--);Sfur007288(LRP1);Sfur007520(--)	K06496+K04550+K06496
Metabolism	Metabolism of terpenoids and polyketides	Terpenoid backbone biosynthesis	9	40	0.24403	0.696136	ko00900	Sfur000207(HMGCS1);Sfur004410(FDPS);Sfur005193(Mvd);Sfur007189(PCYOX1);Sfur013053(Dhrs11);Sfur013403(DHRS11);Sfur015211(Zmpste24);MSTRG.22713(SAR2567);MSTRG.2449(PDSS2)	K01641+K00787+K01597+K05906+K15890+K15890+K06013+K15890+K12505
Organismal Systems	Endocrine system	Parathyroid hormone synthesis, secretion and action	16	77	0.246294	0.696136	ko04928	Sfur000334(Mmp10);Sfur003173(PTH1R);Sfur003786(PTH1R);Sfur004109(ADCY9);Sfur005323(Mef2);Sfur008504(Pka-C1);Sfur008731(RXR);Sfur009965(Itpr);Sfur010316(Pde7b);MSTRG.14692(MMP14);MSTRG.23721(ADCY9);MSTRG.23832(ADCY9);MSTRG.23839(ADCY9);MSTRG.37219(Creb3l4);MSTRG.37220(Creb3l4);MSTRG.38817(Itpr)	K07763+K04585+K04585+K08049+K09260+K04345+K08524+K04958+K13293+K07763+K08049+K08049+K08049+K09048+K09048+K04958
Metabolism	Amino acid metabolism	Tryptophan metabolism	8	35	0.248025	0.696136	ko00380	Sfur000538(--);Sfur001357(AGAP002721);Sfur001384(--);Sfur006106(--);Sfur009057(AAEL010734);Sfur009994(cat);Sfur013135(Aldh2);MSTRG.5712(aldA)	K00669+K00453+K00669+K00669+K01593+K03781+K00128+K00128
Metabolism	Lipid metabolism	Fatty acid biosynthesis	5	20	0.254778	0.7084	ko00061	Sfur002528(Fasn);Sfur007463(FASN);Sfur007714(ACAC);Sfur012428(IQCA1);Sfur012982(Acsl1)	K00665+K00665+K11262+K00665+K01897
Environmental Information Processing	Signal transduction	TNF signaling pathway	11	51	0.256636	0.7084	ko04668	Sfur000334(Mmp10);Sfur001428(--);Sfur002158(dnm1l);Sfur003650(DNM1L);Sfur003997(Ser);Sfur005096(Cwf19l1);Sfur005283(JUN);MSTRG.10604(dnm1l);MSTRG.14692(MMP14);MSTRG.37219(Creb3l4);MSTRG.37220(Creb3l4)	K07763+K05449+K17065+K17065+K06052+K04467+K04448+K17065+K07763+K09048+K09048
Metabolism	Metabolism of cofactors and vitamins	Porphyrin and chlorophyll metabolism	10	46	0.262493	0.718629	ko00860	Sfur001698(--);Sfur003192(Ugt2b1);Sfur003369(Ugt2b1);Sfur003398(MMAB);Sfur010320(Ugt1a2);Sfur011317(Ugt1a8);Sfur011404(UGT2B10);Sfur011788(GluProRS);Sfur012301(BLVRB);MSTRG.7920(UGT2B18)	K00699+K00699+K00699+K00798+K00699+K00699+K00699+K14163+K05901+K00699
Human Diseases	Drug resistance	Endocrine resistance	14	68	0.27758	0.747674	ko01522	Sfur001362(--);Sfur001378(--);Sfur002202(Src64B);Sfur002767(Src64B);Sfur003997(Ser);Sfur004109(ADCY9);Sfur005283(JUN);Sfur006252(--);Sfur006377(Dlish);Sfur008504(Pka-C1);Sfur012798(Svep1);MSTRG.23721(ADCY9);MSTRG.23832(ADCY9);MSTRG.23839(ADCY9)	K17447+K05459+K05704+K05704+K06052+K08049+K04448+K21635+K04364+K04345+K20995+K08049+K08049+K08049
Organismal Systems	Digestive system	Gastric acid secretion	14	68	0.27758	0.747674	ko04971	Sfur001371(MYLK);Sfur001869(Act5C);Sfur004109(ADCY9);Sfur005723(TpnC41C);Sfur006653(IFRD2);Sfur008504(Pka-C1);Sfur009965(Itpr);Sfur012073(CALML4);Sfur012532(TpnC41C);Sfur013596(TpnC41C);MSTRG.23721(ADCY9);MSTRG.23832(ADCY9);MSTRG.23839(ADCY9);MSTRG.38817(Itpr)	K00907+K05692+K08049+K02183+K13855+K04345+K04958+K02183+K02183+K02183+K08049+K08049+K08049+K04958
Organismal Systems	Environmental adaptation	Circadian rhythm - fly	4	16	0.293737	0.784866	ko04711	Sfur002772(Clk);Sfur007763(--);Sfur010509(HLF);Sfur010797(Arntl)	K02223+K12114+K09057+K02296
Human Diseases	Drug resistance	Platinum drug resistance	8	37	0.301497	0.799206	ko01524	Sfur002167(TOP2);Sfur006233(ATP7A);Sfur006841(PTGES);Sfur009752(BIRC6);Sfur012465(AAEL007634);Sfur014179(ATM);Sfur014216(GST1);Sfur015216(MSH2)	K03164+K17686+K00799+K08731+K10847+K04728+K00799+K08735
Human Diseases	Infectious diseases	Pertussis	7	32	0.30981	0.814776	ko05133	Sfur005283(JUN);Sfur005723(TpnC41C);Sfur011206(--);Sfur011999(--);Sfur012073(CALML4);Sfur012532(TpnC41C);Sfur013596(TpnC41C)	K04448+K02183+K12800+K03175+K02183+K02183+K02183
Metabolism	Amino acid metabolism	Valine, leucine and isoleucine biosynthesis	1	2	0.315565	0.823428	ko00290	Sfur007376(tdcB)	K01754
Human Diseases	Cancers	Glioma	9	43	0.319186	0.826421	ko05214	Sfur001362(--);Sfur001378(--);Sfur005342(--);Sfur005723(TpnC41C);Sfur006377(Dlish);Sfur012073(CALML4);Sfur012397(CAMK4);Sfur012532(TpnC41C);Sfur013596(TpnC41C)	K17447+K05459+K04402+K02183+K04364+K02183+K05869+K02183+K02183
Environmental Information Processing	Signal transduction	cGMP - PKG signaling pathway	28	148	0.32778	0.842144	ko04022	Sfur001371(MYLK);Sfur001629(--);Sfur001961(--);Sfur002752(ATP2B1);Sfur002888(Slc8a1);Sfur004029(ppp1cc-a);Sfur004109(ADCY9);Sfur004157(ppp1cc-a);Sfur005323(Mef2);Sfur005723(TpnC41C);Sfur006427(InR);Sfur009374(CNGB1);Sfur009822(--);Sfur009965(Itpr);Sfur010501(sesB);Sfur012073(CALML4);Sfur012085(Adrb2);Sfur012532(TpnC41C);Sfur013596(TpnC41C);MSTRG.10445(Mhc);MSTRG.23721(ADCY9);MSTRG.23832(ADCY9);MS…	K00907+K04526+K04952+K05850+K05849+K06269+K08049+K06269+K09260+K02183+K04527+K04952+K19477+K04958+K05863+K02183+K04142+K02183+K02183+K17751+K08049+K08049+K08049+K05849+K09048+K09048+K04958+K07376
Environmental Information Processing	Signal transduction	Apelin signaling pathway	24	126	0.33173	0.845784	ko04371	Sfur001371(MYLK);Sfur002888(Slc8a1);Sfur003997(Ser);Sfur004109(ADCY9);Sfur005323(Mef2);Sfur005723(TpnC41C);Sfur006056(--);Sfur006579(PGBD2);Sfur008504(Pka-C1);Sfur009965(Itpr);Sfur011083(pik3c3);Sfur012073(CALML4);Sfur012397(CAMK4);Sfur012532(TpnC41C);Sfur012798(Svep1);Sfur013069(--);Sfur013596(TpnC41C);Sfur014293(--);Sfur014647(--);MSTRG.23721(ADCY9);MSTRG.23832(ADCY9);MSTRG.23839(ADCY9);MSTRG.2…	K00907+K05849+K06052+K08049+K09260+K02183+K00914+K00914+K04345+K04958+K00914+K02183+K05869+K02183+K20995+K00914+K02183+K00914+K00914+K08049+K08049+K08049+K05849+K04958
Organismal Systems	Endocrine system	Regulation of lipolysis in adipocyte	12	60	0.336625	0.84674	ko04923	Sfur001415(Pnpla2);Sfur001629(--);Sfur004109(ADCY9);Sfur006427(InR);Sfur008504(Pka-C1);Sfur009822(--);Sfur011918(--);Sfur012085(Adrb2);MSTRG.23721(ADCY9);MSTRG.23832(ADCY9);MSTRG.23839(ADCY9);MSTRG.4305(--)	K16816+K04526+K08049+K04527+K04345+K19477+K16816+K04142+K08049+K08049+K08049+K07376
Environmental Information Processing	Membrane transport	ABC transporters	16	82	0.337175	0.84674	ko02010	Sfur000117(l(2)03659);Sfur001915(ABCG4);Sfur002165(ABCG4);Sfur002197(ABCG1);Sfur002977(Abcg1);Sfur009985(abcG23);Sfur010215(abcG23);Sfur010345(abcG23);Sfur010521(ABCD);Sfur010548(abcG23);Sfur010905(abcG23);Sfur011914(ABCC1);Sfur012519(abcG23);Sfur013227(ABCG21);Sfur013469(abcC12);Sfur014302(ABCB6)	K05673+K05680+K05679+K05680+K05680+K05665+K05665+K05665+K05676+K05665+K05665+K05665+K05665+K05680+K05668+K05661
Organismal Systems	Endocrine system	Insulin signaling pathway	25	133	0.353288	0.870861	ko04910	Sfur001362(--);Sfur001629(--);Sfur002128(Lar);Sfur002233(HK1);Sfur002528(Fasn);Sfur004029(ppp1cc-a);Sfur004157(ppp1cc-a);Sfur005723(TpnC41C);Sfur006377(Dlish);Sfur006427(InR);Sfur006909(--);Sfur007463(FASN);Sfur007714(ACAC);Sfur008451(CBLB);Sfur008504(Pka-C1);Sfur010278(hmces);Sfur011478(PPP1R3C);Sfur012073(CALML4);Sfur012428(IQCA1);Sfur012532(TpnC41C);Sfur013596(TpnC41C);MSTRG.22969(--);MSTRG.25…	K17447+K04526+K05695+K00844+K00665+K06269+K06269+K02183+K04364+K04527+K07190+K00665+K11262+K04707+K04345+K05696+K07189+K02183+K00665+K02183+K02183+K04707+K00844+K00844+K07208
Environmental Information Processing	Signal transduction	Hedgehog signaling pathway - fly	8	39	0.35721	0.870861	ko04341	Sfur004876(ptc);Sfur006821(csnk1g1);Sfur006865(Csnk1g2);Sfur007554(en);Sfur007564(--);Sfur008504(Pka-C1);MSTRG.10902(iHog);MSTRG.36634(IHH)	K06225+K08958+K08958+K09319+K09319+K04345+K20245+K06224
Organismal Systems	Endocrine system	Prolactin signaling pathway	8	39	0.35721	0.870861	ko04917	Sfur001129(CISH);Sfur001362(--);Sfur001629(--);Sfur002202(Src64B);Sfur002767(Src64B);Sfur006377(Dlish);Sfur008761(SOCS5);Sfur010310(ple)	K04701+K17447+K04526+K05704+K05704+K04364+K04698+K00501
Organismal Systems	Digestive system	Mineral absorption	8	39	0.35721	0.870861	ko04978	Sfur001656(FER1);Sfur002752(ATP2B1);Sfur002888(Slc8a1);Sfur005328(SLC46A1);Sfur008868(ATOX1);Sfur013450(ClC-a);Sfur013958(Mvl);MSTRG.24009(SLC8A1)	K00522+K05850+K05849+K14613+K07213+K05011+K21398+K05849
Organismal Systems	Endocrine system	Oxytocin signaling pathway	24	128	0.362493	0.877337	ko04921	Sfur000902(Mlc1);Sfur000915(--);Sfur001371(MYLK);Sfur001869(Act5C);Sfur002202(Src64B);Sfur002767(Src64B);Sfur004029(ppp1cc-a);Sfur004109(ADCY9);Sfur004157(ppp1cc-a);Sfur005283(JUN);Sfur005723(TpnC41C);Sfur007641(--);Sfur007741(CAMKK1);Sfur008504(Pka-C1);Sfur009080(Mlc-c);Sfur009965(Itpr);Sfur012073(CALML4);Sfur012397(CAMK4);Sfur012532(TpnC41C);Sfur013596(TpnC41C);MSTRG.23721(ADCY9);MSTRG.23832(AD…	K12751+K04870+K00907+K05692+K05704+K05704+K06269+K08049+K06269+K04448+K02183+K07359+K07359+K04345+K12751+K04958+K02183+K05869+K02183+K02183+K08049+K08049+K08049+K04958
Human Diseases	Endocrine and metabolic diseases	Type II diabetes mellitus	7	34	0.370322	0.889839	ko04930	Sfur000483(PKLR);Sfur001629(--);Sfur002233(HK1);Sfur006427(InR);Sfur008511(PyK);MSTRG.25617(Hex-t2);MSTRG.3014(Hex-t2)	K00873+K04526+K00844+K04527+K00873+K00844+K00844
Organismal Systems	Endocrine system	Progesterone-mediated oocyte maturation	14	73	0.378685	0.899082	ko04914	Sfur000038(BUB1);Sfur000095(polo);Sfur001378(--);Sfur001474(Anapc4);Sfur001629(--);Sfur003408(Mad2l1);Sfur004109(ADCY9);Sfur006367(ANAPC1);Sfur008504(Pka-C1);Sfur009036(plk1);Sfur012148(plk1);MSTRG.23721(ADCY9);MSTRG.23832(ADCY9);MSTRG.23839(ADCY9)	K02178+K06631+K05459+K03351+K04526+K02537+K08049+K03348+K04345+K06631+K06631+K08049+K08049+K08049
Organismal Systems	Endocrine system	PPAR signaling pathway	12	62	0.381573	0.899082	ko03320	Sfur000207(HMGCS1);Sfur000330(D11DS);Sfur006635(ubq-1);Sfur007578(Slc27a4);Sfur008731(RXR);Sfur010046(CPT1B);Sfur012424(D11DS);Sfur012982(Acsl1);Sfur013200(Scd4);Sfur013234(Scd1);Sfur013434(D11DS);Sfur013479(SCD5)	K01641+K00507+K08770+K08745+K08524+K08765+K00507+K01897+K00507+K00507+K00507+K00507
Metabolism	Lipid metabolism	Sphingolipid metabolism	6	29	0.384936	0.899082	ko00600	Sfur001643(NAGA);Sfur004571(--);Sfur006887(Glb1);Sfur012437(SMPD1);Sfur012811(Cers6);Sfur013298(CDase)	K01189+K01080+K12309+K12350+K23727+K12349
Metabolism	Metabolism of cofactors and vitamins	Nicotinate and nicotinamide metabolism	6	29	0.384936	0.899082	ko00760	Sfur000262(Nnt);Sfur000347(NNT);Sfur002569(PNP);Sfur012045(Sirt3);Sfur013292(nt5dc3);Sfur013362(Nadk)	K00323+K00323+K03783+K11413+K01081+K00858
Human Diseases	Infectious diseases	Human cytomegalovirus infection	22	119	0.398587	0.9245	ko05163	Sfur000419(Calr);Sfur001151(PDIA3);Sfur002202(Src64B);Sfur002767(Src64B);Sfur003710(DDB_G0271356);Sfur003731(PXN);Sfur004109(ADCY9);Sfur005096(Cwf19l1);Sfur005723(TpnC41C);Sfur006377(Dlish);Sfur008504(Pka-C1);Sfur009965(Itpr);Sfur012073(CALML4);Sfur012532(TpnC41C);Sfur013596(TpnC41C);MSTRG.23721(ADCY9);MSTRG.23832(ADCY9);MSTRG.23839(ADCY9);MSTRG.37219(Creb3l4);MSTRG.37220(Creb3l4);MSTRG.38817(Itp…	K08057+K08056+K05704+K05704+K05760+K05760+K08049+K04467+K02183+K04364+K04345+K04958+K02183+K02183+K02183+K08049+K08049+K08049+K09048+K09048+K04958+K07208
Genetic Information Processing	Translation	mRNA surveillance pathway	15	80	0.407371	0.938358	ko03015	Sfur001236(Sym);Sfur001506(CG7185);Sfur003749(rnps1-b);Sfur004029(ppp1cc-a);Sfur004157(ppp1cc-a);Sfur006256(SYMPK);Sfur006845(Cbp80);Sfur009741(Rnmt);Sfur009759(Cpsf1);Sfur012743(CSTF2);Sfur013708(CSTF1);Sfur015038(PPP2R3C);MSTRG.11711(SYMPK);MSTRG.1537(SYMPK);MSTRG.37221(Hrb27C)	K06100+K14398+K14325+K06269+K06269+K06100+K12882+K00565+K14401+K14407+K14406+K11583+K06100+K06100+K14411
Human Diseases	Cancers	Pathways in cancer	51	285	0.412413	0.943466	ko05200	Sfur000280(cwo);Sfur000302(Hsp90b1);Sfur000380(--);Sfur000392(Hsp90b1);Sfur000480(NPEPL1);Sfur000630(--);Sfur001378(--);Sfur001428(--);Sfur001537(ELOC);Sfur001985(fz2);Sfur003765(--);Sfur003997(Ser);Sfur004109(ADCY9);Sfur004876(ptc);Sfur005096(Cwf19l1);Sfur005283(JUN);Sfur005342(--);Sfur005415(CycE);Sfur005723(TpnC41C);Sfur006111(--);Sfur006252(--);Sfur006284(fend);Sfur006377(Dlish);Sfur006413(fe…	K09091+K09487+K03875+K09487+K02085+K06237+K05459+K05449+K03872+K02375+K07299+K06052+K08049+K06225+K04467+K04448+K04402+K06626+K02183+K06237+K21635+K05126+K04364+K05126+K00799+K04707+K04345+K05119+K08524+K08731+K07299+K05635+K03175+K02183+K02183+K20995+K02183+K04462+K02842+K00799+K06237+K08735+K07299+K07299+K04707+K08049+K08049+K08049+K04358+K04358+K06237
Human Diseases	Neurodegenerative diseases	Prion diseases	6	30	0.418298	0.950419	ko05020	Sfur003182(SOD1);Sfur008504(Pka-C1);Sfur010462(LanB2);Sfur012055(KIRREL3);MSTRG.34003(Hsc70-3);MSTRG.34004(Hsc70-3)	K04565+K04345+K05635+K06491+K09490+K09490
Organismal Systems	Circulatory system	Vascular smooth muscle contraction	21	115	0.426523	0.96256	ko04270	Sfur000526(--);Sfur000902(Mlc1);Sfur001371(MYLK);Sfur003362(--);Sfur004029(ppp1cc-a);Sfur004096(calcrl);Sfur004109(ADCY9);Sfur004157(ppp1cc-a);Sfur005723(TpnC41C);Sfur008504(Pka-C1);Sfur009080(Mlc-c);Sfur009965(Itpr);Sfur012073(CALML4);Sfur012532(TpnC41C);Sfur013596(TpnC41C);MSTRG.15448(Calcrl);MSTRG.23721(ADCY9);MSTRG.23832(ADCY9);MSTRG.23839(ADCY9);MSTRG.38817(Itpr);MSTRG.4305(--)	K01047+K12751+K00907+K01047+K06269+K04577+K08049+K06269+K02183+K04345+K12751+K04958+K02183+K02183+K02183+K04577+K08049+K08049+K08049+K04958+K07376
Human Diseases	Infectious diseases	Salmonella infection	32	178	0.43109	0.966335	ko05132	Sfur000219(FLNA);Sfur000302(Hsp90b1);Sfur000392(Hsp90b1);Sfur000619(Dhc64C);Sfur000804(--);Sfur000902(Mlc1);Sfur000970(zip);Sfur001116(ctp);Sfur001869(Act5C);Sfur002555(arpc1a-b);Sfur005096(Cwf19l1);Sfur005283(JUN);Sfur005709(DYNLRB2);Sfur006056(--);Sfur006235(Cse1);Sfur006325(Cse1);Sfur006579(PGBD2);Sfur007457(arpc4);Sfur008187(GAPDH);Sfur008871(arpc5-b);Sfur009080(Mlc-c);Sfur010114(sqh);Sfur011…	K04437+K09487+K09487+K10413+K10352+K12751+K10352+K10418+K05692+K05757+K04467+K04448+K10419+K00914+K18423+K18423+K00914+K05755+K00134+K05754+K12751+K12757+K00914+K12800+K03175+K10413+K00914+K12757+K23612+K00914+K10352+K00914
Cellular Processes	Cell growth and death	Necroptosis	13	71	0.456458	1	ko04217	Sfur001656(FER1);Sfur001830(LUBEL);Sfur002158(dnm1l);Sfur003650(DNM1L);Sfur004759(MFSD12);Sfur005278(H2AZ2);Sfur010052(chmp2b);Sfur010501(sesB);Sfur010718(Gs2);Sfur011206(--);Sfur012437(SMPD1);Sfur012934(Gdh);MSTRG.10604(dnm1l)	K00522+K11974+K17065+K17065+K12197+K11251+K12192+K05863+K01915+K12800+K12350+K00261+K17065
Human Diseases	Endocrine and metabolic diseases	AGE-RAGE signaling pathway in diabetic complications	13	71	0.456458	1	ko04933	Sfur000630(--);Sfur001428(--);Sfur003875(--);Sfur005283(JUN);Sfur005392(--);Sfur006111(--);Sfur008762(--);Sfur008892(--);Sfur013478(--);Sfur014872(--);Sfur015140(--);Sfur015366(--);MSTRG.33770(--)	K06237+K05449+K19720+K04448+K19720+K06237+K19720+K19720+K19720+K19720+K06237+K19720+K06237
Human Diseases	Cancers	Thyroid cancer	4	20	0.462617	1	ko05216	Sfur005342(--);Sfur006284(fend);Sfur006413(fend);Sfur008731(RXR)	K04402+K05126+K05126+K08524
Organismal Systems	Nervous system	Long-term potentiation	11	60	0.466226	1	ko04720	Sfur003099(grin2b);Sfur004029(ppp1cc-a);Sfur004157(ppp1cc-a);Sfur005723(TpnC41C);Sfur008504(Pka-C1);Sfur009965(Itpr);Sfur012073(CALML4);Sfur012397(CAMK4);Sfur012532(TpnC41C);Sfur013596(TpnC41C);MSTRG.38817(Itpr)	K05210+K06269+K06269+K02183+K04345+K04958+K02183+K05869+K02183+K02183+K04958
Metabolism	Carbohydrate metabolism	Glyoxylate and dicarboxylate metabolism	8	43	0.470322	1	ko00630	Sfur000157(HAO1);Sfur000870(hoga1);Sfur002786(MDH2);Sfur009701(AAEL002956);Sfur009994(cat);Sfur010718(Gs2);Sfur011418(Aco1);Sfur013861(--)	K11517+K18123+K00026+K01647+K03781+K01915+K01681+K00026
Metabolism	Glycan biosynthesis and metabolism	Glycosphingolipid biosynthesis - ganglio series	2	9	0.47743	1	ko00604	Sfur001670(fdl);Sfur006887(Glb1)	K12373+K12309
Metabolism	Carbohydrate metabolism	Pyruvate metabolism	9	49	0.477662	1	ko00620	Sfur000483(PKLR);Sfur000898(T05H10.6);Sfur002786(MDH2);Sfur007714(ACAC);Sfur008511(PyK);Sfur013135(Aldh2);Sfur013548(PDHB);Sfur013861(--);MSTRG.5712(aldA)	K00873+K00161+K00026+K11262+K00873+K00128+K00162+K00026+K00128
Metabolism	Metabolism of cofactors and vitamins	Folate biosynthesis	6	32	0.484105	1	ko00790	Sfur001024(ALPL);Sfur001205(AKR1B1);Sfur008684(MTARC1);Sfur008930(Cbr3);Sfur010310(ple);MSTRG.27383(se)	K01077+K00011+K15631+K00079+K00501+K00310
Human Diseases	Cancers	Small cell lung cancer	11	61	0.489818	1	ko05222	Sfur000380(--);Sfur000630(--);Sfur005096(Cwf19l1);Sfur005342(--);Sfur005415(CycE);Sfur006111(--);Sfur008731(RXR);Sfur010462(LanB2);Sfur011999(--);Sfur015140(--);MSTRG.33770(--)	K03875+K06237+K04467+K04402+K06626+K06237+K08524+K05635+K03175+K06237+K06237
Human Diseases	Substance dependence	Morphine addiction	13	73	0.499721	1	ko05032	Sfur001743(pde-5);Sfur001898(Gabbr1);Sfur003989(LHT2);Sfur004109(ADCY9);Sfur008504(Pka-C1);Sfur010067(pde-5);Sfur010314(LHT1);Sfur010316(Pde7b);Sfur015338(PDE10A);MSTRG.2001(Pde11);MSTRG.23721(ADCY9);MSTRG.23832(ADCY9);MSTRG.23839(ADCY9)	K18438+K04615+K15015+K08049+K04345+K18438+K15015+K13293+K18438+K13298+K08049+K08049+K08049
Metabolism	Carbohydrate metabolism	Butanoate metabolism	4	21	0.50308	1	ko00650	Sfur000207(HMGCS1);Sfur005215(ACADS);Sfur006093(HSD11B2);Sfur012504(HMGCL)	K01641+K00248+K00019+K01640
Metabolism	Amino acid metabolism	Lysine degradation	15	85	0.50813	1	ko00310	Sfur006488(Bbox1);Sfur006776(ASH1L);Sfur009221(--);Sfur009482(Setd2);Sfur010039(AGAP012208);Sfur010362(AASS);Sfur013065(--);Sfur013135(Aldh2);Sfur013364(NSD2);Sfur014528(--);Sfur015233(--);Sfur015249(Ehmt2);MSTRG.4286(--);MSTRG.5712(aldA);MSTRG.7334(--)	K00471+K06101+K11426+K11423+K11703+K14157+K11426+K00128+K11424+K11419+K11426+K11420+K11426+K00128+K11426
Environmental Information Processing	Signal transduction	FoxO signaling pathway	15	85	0.50813	1	ko04068	Sfur000095(polo);Sfur000380(--);Sfur001378(--);Sfur001629(--);Sfur003502(NLK);Sfur005096(Cwf19l1);Sfur005342(--);Sfur006377(Dlish);Sfur006427(InR);Sfur009036(plk1);Sfur009496(SAK);Sfur009994(cat);Sfur012148(plk1);Sfur014179(ATM);MSTRG.24264(BNIP3)	K06631+K03875+K05459+K04526+K04468+K04467+K04402+K04364+K04527+K06631+K08863+K03781+K06631+K04728+K15464
Metabolism	Glycan biosynthesis and metabolism	Glycosylphosphatidylinositol(GPI)-anchor biosynthesis	5	27	0.510315	1	ko00563	Sfur000732(--);Sfur005629(Pigu);Sfur008723(PIGT);Sfur014370(Pigp);MSTRG.8273(GPAA1)	K05285+K05293+K05292+K03861+K05289
Environmental Information Processing	Signal transduction	Ras signaling pathway	22	126	0.51446	1	ko04014	Sfur000526(--);Sfur001362(--);Sfur001378(--);Sfur001428(--);Sfur001629(--);Sfur003099(grin2b);Sfur003362(--);Sfur005096(Cwf19l1);Sfur005723(TpnC41C);Sfur006377(Dlish);Sfur006427(InR);Sfur007922(TEK);Sfur008253(Ptpn11);Sfur008504(Pka-C1);Sfur012073(CALML4);Sfur012532(TpnC41C);Sfur012929(5-HT7);Sfur013596(TpnC41C);MSTRG.26165(--);MSTRG.26166(--);MSTRG.28015(dl);MSTRG.9056(Brap)	K01047+K17447+K05459+K05449+K04526+K05210+K01047+K04467+K02183+K04364+K04527+K05121+K07293+K04345+K02183+K02183+K04163+K02183+K04358+K04358+K09254+K10632
Organismal Systems	Aging	Longevity regulating pathway - multiple species	12	68	0.517271	1	ko04213	Sfur001378(--);Sfur001530(--);Sfur001629(--);Sfur003182(SOD1);Sfur004109(ADCY9);Sfur006427(InR);Sfur008504(Pka-C1);Sfur009994(cat);MSTRG.23721(ADCY9);MSTRG.23832(ADCY9);MSTRG.23839(ADCY9);MSTRG.32397(Hspa2)	K05459+K16184+K04526+K04565+K08049+K04527+K04345+K03781+K08049+K08049+K08049+K03283
Cellular Processes	Cell growth and death	Apoptosis - fly	13	74	0.521063	1	ko04214	Sfur002158(dnm1l);Sfur003650(DNM1L);Sfur004042(br);Sfur005283(JUN);Sfur005445(PRDX4);Sfur008362(boka);Sfur011873(kay);Sfur011999(--);Sfur013509(Tspo);Sfur014179(ATM);Sfur015260(Dusp10);MSTRG.10604(dnm1l);MSTRG.34922(DUSP10)	K17065+K17065+K02174+K04448+K03386+K20017+K09031+K03175+K05770+K04728+K20216+K17065+K20216
Organismal Systems	Endocrine system	Melanogenesis	13	74	0.521063	1	ko04916	Sfur001985(fz2);Sfur004109(ADCY9);Sfur005723(TpnC41C);Sfur008504(Pka-C1);Sfur012073(CALML4);Sfur012532(TpnC41C);Sfur013596(TpnC41C);Sfur014187(fzd10-a);MSTRG.23721(ADCY9);MSTRG.23832(ADCY9);MSTRG.23839(ADCY9);MSTRG.37219(Creb3l4);MSTRG.37220(Creb3l4)	K02375+K08049+K02183+K04345+K02183+K02183+K02183+K02842+K08049+K08049+K08049+K09048+K09048
Cellular Processes	Cell growth and death	p53 signaling pathway	7	39	0.521106	1	ko04115	Sfur001378(--);Sfur002601(RnrS);Sfur004946(Sesn);Sfur005342(--);Sfur005415(CycE);Sfur011162(--);Sfur014179(ATM)	K05459+K10808+K10141+K04402+K06626+K04506+K04728
Environmental Information Processing	Signal transduction	Hedgehog signaling pathway	7	39	0.521106	1	ko04340	Sfur002002(--);Sfur002672(Lrp2);Sfur004876(ptc);Sfur005048(KIF3A);Sfur006821(csnk1g1);Sfur006865(Csnk1g2);Sfur008504(Pka-C1)	K06233+K06233+K06225+K10394+K08958+K08958+K04345
Organismal Systems	Immune system	RIG-I-like receptor signaling pathway	5	28	0.544824	1	ko04622	Sfur005096(Cwf19l1);Sfur011999(--);Sfur013204(otud5-a);Sfur015008(TKFC);Sfur015056(TKFC)	K04467+K03175+K12655+K00863+K00863
Organismal Systems	Immune system	IL-17 signaling pathway	5	28	0.544824	1	ko04657	Sfur000302(Hsp90b1);Sfur000392(Hsp90b1);Sfur005096(Cwf19l1);Sfur005283(JUN);Sfur011999(--)	K09487+K09487+K04467+K04448+K03175
Human Diseases	Cancers	Breast cancer	14	81	0.54486	1	ko05224	Sfur000280(cwo);Sfur000480(NPEPL1);Sfur001362(--);Sfur001378(--);Sfur001985(fz2);Sfur003997(Ser);Sfur005283(JUN);Sfur005342(--);Sfur006252(--);Sfur006377(Dlish);Sfur012798(Svep1);Sfur014187(fzd10-a);MSTRG.26165(--);MSTRG.26166(--)	K09091+K02085+K17447+K05459+K02375+K06052+K04448+K04402+K21635+K04364+K20995+K02842+K04358+K04358
Organismal Systems	Digestive system	Salivary secretion	16	94	0.568549	1	ko04970	Sfur002752(ATP2B1);Sfur004109(ADCY9);Sfur005723(TpnC41C);Sfur006653(IFRD2);Sfur008504(Pka-C1);Sfur009822(--);Sfur009965(Itpr);Sfur012073(CALML4);Sfur012085(Adrb2);Sfur012532(TpnC41C);Sfur013596(TpnC41C);MSTRG.23721(ADCY9);MSTRG.23832(ADCY9);MSTRG.23839(ADCY9);MSTRG.38817(Itpr);MSTRG.4305(--)	K05850+K08049+K02183+K13855+K04345+K19477+K04958+K02183+K04142+K02183+K02183+K08049+K08049+K08049+K04958+K07376
Organismal Systems	Circulatory system	Adrenergic signaling in cardiomyocytes	20	118	0.575465	1	ko04261	Sfur000915(--);Sfur002752(ATP2B1);Sfur002888(Slc8a1);Sfur004029(ppp1cc-a);Sfur004109(ADCY9);Sfur004157(ppp1cc-a);Sfur005723(TpnC41C);Sfur008504(Pka-C1);Sfur012073(CALML4);Sfur012085(Adrb2);Sfur012532(TpnC41C);Sfur013596(TpnC41C);Sfur015038(PPP2R3C);MSTRG.10445(Mhc);MSTRG.23721(ADCY9);MSTRG.23832(ADCY9);MSTRG.23839(ADCY9);MSTRG.24009(SLC8A1);MSTRG.37219(Creb3l4);MSTRG.37220(Creb3l4)	K04870+K05850+K05849+K06269+K08049+K06269+K02183+K04345+K02183+K04142+K02183+K02183+K11583+K17751+K08049+K08049+K08049+K05849+K09048+K09048
Human Diseases	Endocrine and metabolic diseases	Cushing syndrome	20	118	0.575465	1	ko04934	Sfur000480(NPEPL1);Sfur001001(SCARB1);Sfur001985(fz2);Sfur003100(pes);Sfur003517(--);Sfur004109(ADCY9);Sfur005415(CycE);Sfur005842(pes);Sfur007895(SCARB2);Sfur008504(Pka-C1);Sfur009965(Itpr);Sfur014187(fzd10-a);MSTRG.2001(Pde11);MSTRG.23721(ADCY9);MSTRG.23832(ADCY9);MSTRG.23839(ADCY9);MSTRG.37219(Creb3l4);MSTRG.37220(Creb3l4);MSTRG.38817(Itpr);MSTRG.8996(--)	K02085+K13885+K02375+K13885+K13885+K08049+K06626+K13885+K13885+K04345+K04958+K02842+K13298+K08049+K08049+K08049+K09048+K09048+K04958+K13885
Environmental Information Processing	Signal transduction	VEGF signaling pathway	5	29	0.578134	1	ko04370	Sfur001362(--);Sfur002202(Src64B);Sfur002767(Src64B);Sfur003710(DDB_G0271356);Sfur003731(PXN)	K17447+K05704+K05704+K05760+K05760
Human Diseases	Cancers	Prostate cancer	9	53	0.579132	1	ko05215	Sfur000302(Hsp90b1);Sfur000392(Hsp90b1);Sfur001378(--);Sfur001629(--);Sfur005096(Cwf19l1);Sfur005415(CycE);Sfur006377(Dlish);MSTRG.37219(Creb3l4);MSTRG.37220(Creb3l4)	K09487+K09487+K05459+K04526+K04467+K06626+K04364+K09048+K09048
Genetic Information Processing	Folding, sorting and degradation	SNARE interactions in vesicular transport	4	23	0.579554	1	ko04130	Sfur003329(--);Sfur003666(unc-64);Sfur004599(use1);Sfur010881(--)	K04560+K04560+K08507+K08491
Human Diseases	Infectious diseases	Shigellosis	34	201	0.583381	1	ko05131	Sfur000079(RRAGA);Sfur001530(--);Sfur001830(LUBEL);Sfur001869(Act5C);Sfur002202(Src64B);Sfur002233(HK1);Sfur002555(arpc1a-b);Sfur002767(Src64B);Sfur003664(Pex23);Sfur003710(DDB_G0271356);Sfur003731(PXN);Sfur005096(Cwf19l1);Sfur005283(JUN);Sfur006056(--);Sfur006579(PGBD2);Sfur007457(arpc4);Sfur008871(arpc5-b);Sfur009889(Sep2);Sfur009965(Itpr);Sfur010114(sqh);Sfur011083(pik3c3);Sfur011206(--);Sfur0…	K16185+K16184+K11974+K05692+K05704+K00844+K05757+K05704+K17988+K05760+K05760+K04467+K04448+K00914+K00914+K05755+K05754+K16939+K04958+K12757+K00914+K12800+K03175+K00914+K12757+K17890+K23612+K04728+K00914+K00914+K15464+K00844+K00844+K04958
Organismal Systems	Environmental adaptation	Circadian entrainment	14	84	0.603726	1	ko04713	Sfur003099(grin2b);Sfur004109(ADCY9);Sfur005723(TpnC41C);Sfur008504(Pka-C1);Sfur009822(--);Sfur009965(Itpr);Sfur012073(CALML4);Sfur012532(TpnC41C);Sfur013596(TpnC41C);MSTRG.23721(ADCY9);MSTRG.23832(ADCY9);MSTRG.23839(ADCY9);MSTRG.38817(Itpr);MSTRG.4305(--)	K05210+K08049+K02183+K04345+K19477+K04958+K02183+K02183+K02183+K08049+K08049+K08049+K04958+K07376
Genetic Information Processing	Replication and repair	Homologous recombination	6	36	0.606968	1	ko03440	Sfur005462(RpA-70);Sfur008184(DNApol-delta);Sfur009691(DNApol-delta);Sfur013892(rad50);Sfur014179(ATM);MSTRG.1499(--)	K07466+K02327+K02327+K10866+K04728+K10683
Metabolism	Metabolism of cofactors and vitamins	Biotin metabolism	1	5	0.612542	1	ko00780	Sfur011825(vanin-like)	K01435
Organismal Systems	Endocrine system	Insulin secretion	14	85	0.622576	1	ko04911	Sfur001629(--);Sfur003329(--);Sfur003666(unc-64);Sfur003765(--);Sfur004109(ADCY9);Sfur008504(Pka-C1);Sfur010434(fgt-1);MSTRG.14814(SLC2A3);MSTRG.14815(SLC2A3);MSTRG.23721(ADCY9);MSTRG.23832(ADCY9);MSTRG.23839(ADCY9);MSTRG.37219(Creb3l4);MSTRG.37220(Creb3l4)	K04526+K04560+K04560+K07299+K08049+K04345+K07299+K07299+K07299+K08049+K08049+K08049+K09048+K09048
Human Diseases	Infectious diseases	Tuberculosis	18	109	0.62302	1	ko05152	Sfur001004(atp6v0a1);Sfur001911(COLEC12);Sfur002202(Src64B);Sfur002767(Src64B);Sfur005723(TpnC41C);Sfur006056(--);Sfur006579(PGBD2);Sfur009516(ATP6V0B);Sfur011083(pik3c3);Sfur011405(VhaAC39-1);Sfur011999(--);Sfur012073(CALML4);Sfur012532(TpnC41C);Sfur013069(--);Sfur013596(TpnC41C);Sfur013642(ATP6V0D1);Sfur014293(--);Sfur014647(--)	K02154+K10059+K05704+K05704+K02183+K00914+K00914+K03661+K00914+K02146+K03175+K02183+K02183+K00914+K02183+K02146+K00914+K00914
Human Diseases	Infectious diseases	Hepatitis B	12	73	0.623245	1	ko05161	Sfur002202(Src64B);Sfur002767(Src64B);Sfur005096(Cwf19l1);Sfur005283(JUN);Sfur005415(CycE);Sfur005880(PCNA);Sfur006377(Dlish);Sfur008550(Hspg2);Sfur009752(BIRC6);Sfur011999(--);MSTRG.37219(Creb3l4);MSTRG.37220(Creb3l4)	K05704+K05704+K04467+K04448+K06626+K04802+K04364+K06255+K08731+K03175+K09048+K09048
Metabolism	Metabolism of other amino acids	Selenocompound metabolism	3	18	0.62371	1	ko00450	Sfur000372(CTH);Sfur012398(Scly);Sfur013538(SelD)	K01758+K01763+K01008
Metabolism	Metabolism of cofactors and vitamins	Thiamine metabolism	3	18	0.62371	1	ko00730	Sfur001024(ALPL);Sfur011670(AK7);Sfur015419(Ak8)	K01077+K00939+K00939
Organismal Systems	Immune system	Hematopoietic cell lineage	3	18	0.62371	1	ko04640	Sfur000935(Trhde);Sfur012117(--);MSTRG.35605(ANPEP)	K11140+K11140+K11140
Human Diseases	Cancers	Chronic myeloid leukemia	8	49	0.628405	1	ko05220	Sfur001362(--);Sfur005096(Cwf19l1);Sfur005342(--);Sfur006377(Dlish);Sfur008253(Ptpn11);Sfur008451(CBLB);Sfur014131(ham);MSTRG.22969(--)	K17447+K04467+K04402+K04364+K07293+K04707+K04462+K04707
Human Diseases	Cancers	Melanoma	4	25	0.648812	1	ko05218	Sfur001378(--);Sfur005342(--);MSTRG.26165(--);MSTRG.26166(--)	K05459+K04402+K04358+K04358
Metabolism	Glycan biosynthesis and metabolism	Glycosaminoglycan biosynthesis - heparan sulfate / heparin	3	19	0.661709	1	ko00534	Sfur009129(HS2ST1);Sfur009795(B3GALT6);Sfur013379(bun)	K02513+K00734+K02514
Environmental Information Processing	Signal transduction	Sphingolipid signaling pathway	11	69	0.664486	1	ko04071	Sfur009985(abcG23);Sfur010215(abcG23);Sfur010345(abcG23);Sfur010548(abcG23);Sfur010905(abcG23);Sfur011914(ABCC1);Sfur012437(SMPD1);Sfur012519(abcG23);Sfur012811(Cers6);Sfur013298(CDase);Sfur015038(PPP2R3C)	K05665+K05665+K05665+K05665+K05665+K05665+K12350+K05665+K23727+K12349+K11583
Organismal Systems	Endocrine system	Thyroid hormone signaling pathway	20	124	0.669432	1	ko04919	Sfur001806(Slc16a10);Sfur001869(Act5C);Sfur002202(Src64B);Sfur002767(Src64B);Sfur003765(--);Sfur008504(Pka-C1);Sfur008731(RXR);Sfur010434(fgt-1);Sfur012798(Svep1);Sfur014137(MED14);Sfur014170(MED24);Sfur014787(--);Sfur014796(slc16a10);MSTRG.10445(Mhc);MSTRG.14814(SLC2A3);MSTRG.14815(SLC2A3);MSTRG.39804(--);MSTRG.39806(--);MSTRG.7349(Rheb);MSTRG.976(--)	K08187+K05692+K05704+K05704+K07299+K04345+K08524+K07299+K20995+K15156+K15167+K08187+K08187+K17751+K07299+K07299+K11644+K11644+K07208+K17902
Organismal Systems	Immune system	Th1 and Th2 cell differentiation	5	32	0.6696	1	ko04658	Sfur003997(Ser);Sfur005096(Cwf19l1);Sfur005283(JUN);Sfur006252(--);Sfur012798(Svep1)	K06052+K04467+K04448+K21635+K20995
Organismal Systems	Nervous system	Cholinergic synapse	13	82	0.678418	1	ko04725	Sfur004109(ADCY9);Sfur004872(ChT);Sfur007032(--);Sfur008504(Pka-C1);Sfur008634(--);Sfur009965(Itpr);Sfur012397(CAMK4);MSTRG.23721(ADCY9);MSTRG.23832(ADCY9);MSTRG.23839(ADCY9);MSTRG.37219(Creb3l4);MSTRG.37220(Creb3l4);MSTRG.38817(Itpr)	K08049+K14387+K04809+K04345+K01049+K04958+K05869+K08049+K08049+K08049+K09048+K09048+K04958
Metabolism	Lipid metabolism	Primary bile acid biosynthesis	1	6	0.6795	1	ko00120	Sfur008657(Amacr)	K01796
Metabolism	Metabolism of other amino acids	D-Glutamine and D-glutamate metabolism	1	6	0.6795	1	ko00471	Sfur012934(Gdh)	K00261
Human Diseases	Immune diseases	Inflammatiory bowel disease (IBD)	1	6	0.6795	1	ko05321	Sfur005283(JUN)	K04448
Environmental Information Processing	Signal transduction	NF-kappa B signaling pathway	4	26	0.680453	1	ko04064	Sfur005096(Cwf19l1);Sfur005342(--);Sfur011999(--);Sfur014179(ATM)	K04467+K04402+K03175+K04728
Human Diseases	Cancers	Choline metabolism in cancer	12	76	0.680865	1	ko05231	Sfur000297(AGAP006244);Sfur003418(--);Sfur004571(--);Sfur004872(ChT);Sfur005283(JUN);Sfur005579(Orct);Sfur006218(CHKB);Sfur006377(Dlish);Sfur014557(Orct2);Sfur014772(Slc22a13);Sfur015246(Orct);MSTRG.7349(Rheb)	K06515+K06515+K01080+K14387+K04448+K08202+K14156+K04364+K08200+K08200+K08202+K07208
Genetic Information Processing	Replication and repair	Non-homologous end-joining	2	13	0.684398	1	ko03450	Sfur013892(rad50);MSTRG.27247(Fen1)	K10866+K04799
Human Diseases	Neurodegenerative diseases	Amyotrophic lateral sclerosis (ALS)	6	39	0.687569	1	ko05014	Sfur003099(grin2b);Sfur003182(SOD1);Sfur005057(DERL1);Sfur005578(Gpx6);Sfur009994(cat);Sfur014606(--)	K05210+K04565+K11519+K00432+K03781+K02308
Cellular Processes	Cell growth and death	Apoptosis - multiple species	3	20	0.696843	1	ko04215	Sfur003548(SEPTIN4);Sfur008362(boka);Sfur009752(BIRC6)	K16943+K20017+K08731
Human Diseases	Cancers	Basal cell carcinoma	5	33	0.697002	1	ko05217	Sfur000480(NPEPL1);Sfur001985(fz2);Sfur004876(ptc);Sfur005342(--);Sfur014187(fzd10-a)	K02085+K02375+K06225+K04402+K02842
Genetic Information Processing	Translation	Aminoacyl-tRNA biosynthesis	9	59	0.711716	1	ko00970	Sfur008113(vars1);Sfur008237(AlaRS);Sfur008457(AlaRS);Sfur009119(Sars1);Sfur011788(GluProRS);Sfur013112(GlnRS);Sfur013349(GlnRS);Sfur015226(CPIJ001717);MSTRG.2618(vars1)	K01873+K01872+K01872+K01875+K14163+K01886+K01886+K02434+K01873
Environmental Information Processing	Signal transduction	ErbB signaling pathway	7	47	0.725391	1	ko04012	Sfur001362(--);Sfur002202(Src64B);Sfur002767(Src64B);Sfur005283(JUN);Sfur006377(Dlish);Sfur008451(CBLB);MSTRG.22969(--)	K17447+K05704+K05704+K04448+K04364+K04707+K04707
Environmental Information Processing	Signal transduction	Phospholipase D signaling pathway	13	85	0.729016	1	ko04072	Sfur001362(--);Sfur001629(--);Sfur004109(ADCY9);Sfur004571(--);Sfur006377(Dlish);Sfur006427(InR);Sfur008253(Ptpn11);Sfur013430(--);Sfur014704(AGPAT1);MSTRG.23721(ADCY9);MSTRG.23832(ADCY9);MSTRG.23839(ADCY9);MSTRG.7349(Rheb)	K17447+K04526+K08049+K01080+K04364+K04527+K07293+K04609+K13509+K08049+K08049+K08049+K07208
Organismal Systems	Nervous system	GABAergic synapse	11	73	0.737609	1	ko04727	Sfur001898(Gabbr1);Sfur002202(Src64B);Sfur002767(Src64B);Sfur003989(LHT2);Sfur004109(ADCY9);Sfur008504(Pka-C1);Sfur010314(LHT1);Sfur010718(Gs2);MSTRG.23721(ADCY9);MSTRG.23832(ADCY9);MSTRG.23839(ADCY9)	K04615+K05704+K05704+K15015+K08049+K04345+K15015+K01915+K08049+K08049+K08049
Organismal Systems	Nervous system	Glutamatergic synapse	12	80	0.749084	1	ko04724	Sfur003099(grin2b);Sfur004109(ADCY9);Sfur006906(--);Sfur008504(Pka-C1);Sfur009577(Shank3);Sfur009965(Itpr);Sfur010718(Gs2);Sfur013430(--);MSTRG.23721(ADCY9);MSTRG.23832(ADCY9);MSTRG.23839(ADCY9);MSTRG.38817(Itpr)	K05210+K08049+K05204+K04345+K15009+K04958+K01915+K04609+K08049+K08049+K08049+K04958
Human Diseases	Substance dependence	Nicotine addiction	4	29	0.76309	1	ko05033	Sfur003099(grin2b);Sfur003989(LHT2);Sfur007032(--);Sfur010314(LHT1)	K05210+K15015+K04809+K15015
Environmental Information Processing	Signal transduction	Rap1 signaling pathway	23	150	0.768305	1	ko04015	Sfur001378(--);Sfur001428(--);Sfur001629(--);Sfur001869(Act5C);Sfur002202(Src64B);Sfur002767(Src64B);Sfur003099(grin2b);Sfur004109(ADCY9);Sfur005723(TpnC41C);Sfur006427(InR);Sfur007675(Gpr161);Sfur007922(TEK);Sfur010699(At1g62600);Sfur011476(PRKD3);Sfur011763(--);Sfur012073(CALML4);Sfur012532(TpnC41C);Sfur013596(TpnC41C);MSTRG.23721(ADCY9);MSTRG.23832(ADCY9);MSTRG.23839(ADCY9);MSTRG.26165(--);MST…	K05459+K05449+K04526+K05692+K05704+K05704+K05210+K08049+K02183+K04527+K04145+K05121+K05631+K06070+K12490+K02183+K02183+K02183+K08049+K08049+K08049+K04358+K04358
Human Diseases	Infectious diseases	Kaposi sarcoma-associated herpesvirus infection	16	107	0.775295	1	ko05167	Sfur002202(Src64B);Sfur002767(Src64B);Sfur005096(Cwf19l1);Sfur005283(JUN);Sfur005723(TpnC41C);Sfur006056(--);Sfur006579(PGBD2);Sfur009965(Itpr);Sfur011083(pik3c3);Sfur012073(CALML4);Sfur012532(TpnC41C);Sfur013069(--);Sfur013596(TpnC41C);Sfur014293(--);Sfur014647(--);MSTRG.38817(Itpr)	K05704+K05704+K04467+K04448+K02183+K00914+K00914+K04958+K00914+K02183+K02183+K00914+K02183+K00914+K00914+K04958
Human Diseases	Cancers	Hepatocellular carcinoma	15	101	0.7791	1	ko05225	Sfur000480(NPEPL1);Sfur001362(--);Sfur001869(Act5C);Sfur001985(fz2);Sfur003025(ACTL6B);Sfur005342(--);Sfur006377(Dlish);Sfur006841(PTGES);Sfur006908(Bap60);Sfur011893(SMARCC2);Sfur014187(fzd10-a);Sfur014216(GST1);Sfur014542(osa);Sfur014709(brm);MSTRG.32937(--)	K02085+K17447+K05692+K02375+K11652+K04402+K04364+K00799+K11650+K11649+K02842+K00799+K11653+K11647+K11653
Organismal Systems	Sensory system	Phototransduction - fly	12	82	0.779264	1	ko04745	Sfur001869(Act5C);Sfur004335(MYO3A);Sfur005723(TpnC41C);Sfur007718(Dagla);Sfur007783(--);Sfur009965(Itpr);Sfur011060(--);Sfur011472(-);Sfur012073(CALML4);Sfur012532(TpnC41C);Sfur013596(TpnC41C);MSTRG.38817(Itpr)	K05692+K08834+K02183+K13806+K13806+K04958+K08834+K08834+K02183+K02183+K02183+K04958
Human Diseases	Infectious diseases	Human papillomavirus infection	35	225	0.780657	1	ko05165	Sfur000280(cwo);Sfur000480(NPEPL1);Sfur000483(PKLR);Sfur000630(--);Sfur000982(l(2)gl);Sfur001004(atp6v0a1);Sfur001376(--);Sfur001985(fz2);Sfur003185(hgh1);Sfur003710(DDB_G0271356);Sfur003731(PXN);Sfur003997(Ser);Sfur005096(Cwf19l1);Sfur005415(CycE);Sfur006111(--);Sfur006377(Dlish);Sfur006971(Agrn);Sfur008504(Pka-C1);Sfur008511(PyK);Sfur009516(ATP6V0B);Sfur010462(LanB2);Sfur010699(At1g62600);Sfur0…	K09091+K02085+K00873+K06237+K06094+K02154+K02152+K02375+K12236+K05760+K05760+K06052+K04467+K06626+K06237+K04364+K06238+K04345+K00873+K03661+K05635+K05631+K02146+K20995+K02146+K04728+K02842+K06091+K02150+K11583+K06237+K06237+K09048+K09048+K07208
Metabolism	Amino acid metabolism	Phenylalanine metabolism	1	8	0.780724	1	ko00360	Sfur009057(AAEL010734)	K01593
Metabolism	Metabolism of cofactors and vitamins	Riboflavin metabolism	1	8	0.780724	1	ko00740	Sfur012301(BLVRB)	K05901
Metabolism	Energy metabolism	Sulfur metabolism	1	8	0.780724	1	ko00920	Sfur002064(selenbp1-a)	K17285
Metabolism	Amino acid metabolism	Cysteine and methionine metabolism	7	50	0.784272	1	ko00270	Sfur000372(CTH);Sfur002093(AGXT2);Sfur002786(MDH2);Sfur008345(apip);Sfur008704(HMT-2);Sfur011125(AGAP003331);Sfur013861(--)	K01758+K00827+K00026+K08964+K00547+K09880+K00026
Human Diseases	Cancers	Viral carcinogenesis	20	133	0.78668	1	ko05203	Sfur000380(--);Sfur000483(PKLR);Sfur002202(Src64B);Sfur002767(Src64B);Sfur003710(DDB_G0271356);Sfur003731(PXN);Sfur003860(dnaJ);Sfur005283(JUN);Sfur005415(CycE);Sfur006377(Dlish);Sfur007941(Sb);Sfur008504(Pka-C1);Sfur008511(PyK);Sfur009998(SND1);Sfur011405(VhaAC39-1);Sfur013642(ATP6V0D1);Sfur014918(Gel);MSTRG.28015(dl);MSTRG.37219(Creb3l4);MSTRG.37220(Creb3l4)	K03875+K00873+K05704+K05704+K05760+K05760+K09504+K04448+K06626+K04364+K08665+K04345+K00873+K15979+K02146+K02146+K05768+K09254+K09048+K09048
Human Diseases	Infectious disease: viral	Human immunodeficiency virus 1 infection	16	108	0.787908	1	ko05170	Sfur000419(Calr);Sfur001151(PDIA3);Sfur001537(ELOC);Sfur003371(APPBP2);Sfur003710(DDB_G0271356);Sfur003731(PXN);Sfur005096(Cwf19l1);Sfur005283(JUN);Sfur005723(TpnC41C);Sfur009965(Itpr);Sfur011999(--);Sfur012073(CALML4);Sfur012532(TpnC41C);Sfur013596(TpnC41C);Sfur014179(ATM);MSTRG.38817(Itpr)	K08057+K08056+K03872+K11789+K05760+K05760+K04467+K04448+K02183+K04958+K03175+K02183+K02183+K02183+K04728+K04958
Human Diseases	Cancer: overview	PD-L1 expression and PD-1 checkpoint pathway in cancer	5	37	0.790571	1	ko05235	Sfur005096(Cwf19l1);Sfur005283(JUN);Sfur008253(Ptpn11);Sfur008719(Alk);Sfur011999(--)	K04467+K04448+K07293+K05119+K03175
Metabolism	Global and overview maps	Carbon metabolism	38	245	0.794726	1	ko01200	Sfur000157(HAO1);Sfur000483(PKLR);Sfur000898(T05H10.6);Sfur002041(Pgi);Sfur002180(GPT);Sfur002233(HK1);Sfur002616(gpt2l);Sfur002786(MDH2);Sfur004874(PSPH);Sfur005215(ACADS);Sfur005488(PGK1);Sfur005703(--);Sfur006611(rgn);Sfur006735(pgk-1);Sfur007376(tdcB);Sfur008187(GAPDH);Sfur008511(PyK);Sfur009701(AAEL002956);Sfur009994(cat);Sfur011418(Aco1);Sfur012700(Idh1);Sfur012802(rgn);Sfur012934(Gdh);Sfur…	K11517+K00873+K00161+K01810+K00814+K00844+K00814+K00026+K01079+K00248+K00927+K00164+K01053+K00927+K01754+K00134+K00873+K01647+K03781+K01681+K00031+K01053+K00261+K01053+K00850+K00162+K00030+K00026+K00164+K00863+K01623+K00863+K01053+K01623+K00164+K01623+K00844+K00844
Organismal Systems	Immune system	Toll and Imd signaling pathway	11	77	0.799338	1	ko04624	Sfur000631(SPE);Sfur000807(SPE);Sfur004720(--);Sfur005283(JUN);Sfur005596(Ank3);Sfur011690(SPE);Sfur011789(--);Sfur011873(kay);Sfur013134(GRP);Sfur015067(Toll-7);MSTRG.28015(dl)	K20672+K20672+K20668+K04448+K10380+K20672+K20674+K09031+K20697+K18809+K09254
Human Diseases	Infectious diseases	Hepatitis C	10	71	0.806122	1	ko05160	Sfur001001(SCARB1);Sfur003100(pes);Sfur003517(--);Sfur005096(Cwf19l1);Sfur005842(pes);Sfur006377(Dlish);Sfur007895(SCARB2);Sfur008731(RXR);Sfur011999(--);MSTRG.8996(--)	K13885+K13885+K13885+K04467+K13885+K04364+K13885+K08524+K03175+K13885
Metabolism	Glycan biosynthesis and metabolism	Other glycan degradation	4	31	0.808258	1	ko00511	Sfur000028(GD10667);Sfur001670(fdl);Sfur006887(Glb1);Sfur011466(MAN2B1)	K01444+K12373+K12309+K12311
Environmental Information Processing	Signal transduction	Jak-STAT signaling pathway	4	31	0.808258	1	ko04630	Sfur001129(CISH);Sfur006377(Dlish);Sfur008253(Ptpn11);Sfur008761(SOCS5)	K04701+K04364+K07293+K04698
Metabolism	Glycan biosynthesis and metabolism	Mannose type O-glycan biosyntheis	3	24	0.809869	1	ko00515	Sfur007517(b4gat1);Sfur009196(rt);Sfur012142(tw)	K21032+K00728+K00728
Organismal Systems	Excretory system	Aldosterone-regulated sodium reabsorption	3	24	0.809869	1	ko04960	Sfur001378(--);Sfur001629(--);Sfur006427(InR)	K05459+K04526+K04527
Cellular Processes	Transport and catabolism	Autophagy - animal	30	198	0.813847	1	ko04140	Sfur000079(RRAGA);Sfur001530(--);Sfur001629(--);Sfur003703(At1g06840);Sfur005841(RB1CC1);Sfur005885(cfaD);Sfur006056(--);Sfur006579(PGBD2);Sfur007067(TINAGL1);Sfur007641(--);Sfur007741(CAMKK1);Sfur008091(RB1CC1);Sfur008504(Pka-C1);Sfur009189(ATG9A);Sfur009500(--);Sfur009965(Itpr);Sfur010881(--);Sfur011083(pik3c3);Sfur011999(--);Sfur013069(--);Sfur013517(ATG16L1);Sfur014231(chrb);Sfur014293(--);Sf…	K16185+K16184+K04526+K08852+K17589+K01365+K00914+K00914+K01363+K07359+K07359+K17589+K04345+K17907+K17907+K04958+K08491+K00914+K03175+K00914+K17890+K08270+K00914+K00914+K01365+K01365+K01365+K15464+K04958+K07208
Human Diseases	Endocrine and metabolic diseases	Type I diabetes mellitus	1	9	0.818636	1	ko04940	Sfur001629(--)	K04526
Human Diseases	Cancers	Bladder cancer	2	17	0.819118	1	ko05219	Sfur002202(Src64B);Sfur002767(Src64B)	K05704+K05704
Organismal Systems	Immune system	Chemokine signaling pathway	12	85	0.819582	1	ko04062	Sfur001362(--);Sfur002202(Src64B);Sfur002767(Src64B);Sfur003710(DDB_G0271356);Sfur003731(PXN);Sfur004109(ADCY9);Sfur005096(Cwf19l1);Sfur006377(Dlish);Sfur008504(Pka-C1);MSTRG.23721(ADCY9);MSTRG.23832(ADCY9);MSTRG.23839(ADCY9)	K17447+K05704+K05704+K05760+K05760+K08049+K04467+K04364+K04345+K08049+K08049+K08049
Environmental Information Processing	Signaling molecules and interaction	ECM-receptor interaction	11	79	0.825915	1	ko04512	Sfur000630(--);Sfur000702(Svopl);Sfur006111(--);Sfur006631(Sv2b);Sfur006971(Agrn);Sfur007281(Svop);Sfur008550(Hspg2);Sfur010462(LanB2);Sfur015140(--);MSTRG.33770(--);MSTRG.35338(SLC22A3)	K06237+K06258+K06237+K06258+K06238+K06258+K06255+K05635+K06237+K06237+K06258
Environmental Information Processing	Signal transduction	Hippo signaling pathway - multiple species	4	32	0.828066	1	ko04392	Sfur002336(ft);Sfur002901(ft);Sfur003094(ft);Sfur012755(Cad89D)	K16669+K16669+K16669+K16669
Human Diseases	Cancers	Non-small cell lung cancer	4	32	0.828066	1	ko05223	Sfur005342(--);Sfur006377(Dlish);Sfur008719(Alk);Sfur008731(RXR)	K04402+K04364+K05119+K08524
Organismal Systems	Endocrine system	Growth hormone synthesis, secretion and action	12	86	0.831726	1	ko04935	Sfur001362(--);Sfur001378(--);Sfur004109(ADCY9);Sfur006377(Dlish);Sfur008504(Pka-C1);Sfur009965(Itpr);MSTRG.23721(ADCY9);MSTRG.23832(ADCY9);MSTRG.23839(ADCY9);MSTRG.37219(Creb3l4);MSTRG.37220(Creb3l4);MSTRG.38817(Itpr)	K17447+K05459+K08049+K04364+K04345+K04958+K08049+K08049+K08049+K09048+K09048+K04958
Cellular Processes	Cellular community - eukaryotes	Focal adhesion	22	150	0.831738	1	ko04510	Sfur000219(FLNA);Sfur000630(--);Sfur001362(--);Sfur001371(MYLK);Sfur001378(--);Sfur001428(--);Sfur001869(Act5C);Sfur002202(Src64B);Sfur002767(Src64B);Sfur003710(DDB_G0271356);Sfur003731(PXN);Sfur004029(ppp1cc-a);Sfur004157(ppp1cc-a);Sfur005283(JUN);Sfur006111(--);Sfur006377(Dlish);Sfur006971(Agrn);Sfur010114(sqh);Sfur010462(LanB2);Sfur013089(--);Sfur015140(--);MSTRG.33770(--)	K04437+K06237+K17447+K00907+K05459+K05449+K05692+K05704+K05704+K05760+K05760+K06269+K06269+K04448+K06237+K04364+K06238+K12757+K05635+K12757+K06237+K06237
Organismal Systems	Nervous system	Neurotrophin signaling pathway	10	73	0.833023	1	ko04722	Sfur001362(--);Sfur005283(JUN);Sfur005723(TpnC41C);Sfur006377(Dlish);Sfur008253(Ptpn11);Sfur011999(--);Sfur012073(CALML4);Sfur012397(CAMK4);Sfur012532(TpnC41C);Sfur013596(TpnC41C)	K17447+K04448+K02183+K04364+K07293+K03175+K02183+K05869+K02183+K02183
Environmental Information Processing	Signal transduction	MAPK signaling pathway	21	144	0.834707	1	ko04010	Sfur000219(FLNA);Sfur000915(--);Sfur001378(--);Sfur001428(--);Sfur001629(--);Sfur003502(NLK);Sfur005096(Cwf19l1);Sfur005283(JUN);Sfur005342(--);Sfur006377(Dlish);Sfur006427(InR);Sfur007922(TEK);Sfur008504(Pka-C1);Sfur011999(--);Sfur014131(ham);Sfur014606(--);Sfur015260(Dusp10);MSTRG.26165(--);MSTRG.26166(--);MSTRG.32397(Hspa2);MSTRG.34922(DUSP10)	K04437+K04870+K05459+K05449+K04526+K04468+K04467+K04448+K04402+K04364+K04527+K05121+K04345+K03175+K04462+K02308+K20216+K04358+K04358+K03283+K20216
Organismal Systems	Environmental adaptation	Circadian rhythm	2	18	0.843544	1	ko04710	Sfur002772(Clk);Sfur010797(Arntl)	K02223+K02296
Human Diseases	Infectious diseases	Leishmaniasis	2	18	0.843544	1	ko05140	Sfur005283(JUN);Sfur011999(--)	K04448+K03175
Human Diseases	Drug resistance	EGFR tyrosine kinase inhibitor resistance	5	40	0.84467	1	ko01521	Sfur001362(--);Sfur001378(--);Sfur002202(Src64B);Sfur002767(Src64B);Sfur006377(Dlish)	K17447+K05459+K05704+K05704+K04364
Organismal Systems	Nervous system	Long-term depression	5	40	0.84467	1	ko04730	Sfur001378(--);Sfur009822(--);Sfur009965(Itpr);MSTRG.38817(Itpr);MSTRG.4305(--)	K05459+K19477+K04958+K04958+K07376
Organismal Systems	Endocrine system	Renin-angiotensin system	3	26	0.851576	1	ko04614	Sfur000935(Trhde);Sfur012117(--);MSTRG.35605(ANPEP)	K11140+K11140+K11140
Cellular Processes	Cellular community - eukaryotes	Adherens junction	10	75	0.856956	1	ko04520	Sfur001869(Act5C);Sfur002128(Lar);Sfur002202(Src64B);Sfur002767(Src64B);Sfur003502(NLK);Sfur004373(Iqgap1);Sfur006427(InR);Sfur009753(--);Sfur010278(hmces);Sfur013846(--)	K05692+K05695+K05704+K05704+K04468+K16848+K04527+K05706+K05696+K23612
Organismal Systems	Development	Dorso-ventral axis formation	5	41	0.859924	1	ko04320	Sfur001261(aop);Sfur001462(aop);Sfur004042(br);Sfur006377(Dlish);MSTRG.27232(--)	K03211+K03211+K02174+K04364+K02104
Organismal Systems	Immune system	NOD-like receptor signaling pathway	12	89	0.864437	1	ko04621	Sfur001830(LUBEL);Sfur002158(dnm1l);Sfur003650(DNM1L);Sfur005096(Cwf19l1);Sfur005283(JUN);Sfur007067(TINAGL1);Sfur009965(Itpr);Sfur011206(--);Sfur011999(--);Sfur013517(ATG16L1);MSTRG.10604(dnm1l);MSTRG.38817(Itpr)	K11974+K17065+K17065+K04467+K04448+K01363+K04958+K12800+K03175+K17890+K17065+K04958
Human Diseases	Cancers	MicroRNAs in cancer	17	122	0.866865	1	ko05206	Sfur000480(NPEPL1);Sfur003040(Kif23);Sfur005293(sem-2);Sfur005415(CycE);Sfur006377(Dlish);Sfur007797(BMPR2);Sfur009985(abcG23);Sfur010215(abcG23);Sfur010345(abcG23);Sfur010548(abcG23);Sfur010905(abcG23);Sfur011914(ABCC1);Sfur012519(abcG23);Sfur012798(Svep1);Sfur014179(ATM);Sfur014231(chrb);MSTRG.7293(--)	K02085+K17387+K23581+K06626+K04364+K04671+K05665+K05665+K05665+K05665+K05665+K05665+K05665+K20995+K04728+K08270+K11459
Organismal Systems	Endocrine system	Renin secretion	10	76	0.867861	1	ko04924	Sfur005723(TpnC41C);Sfur007067(TINAGL1);Sfur008504(Pka-C1);Sfur009822(--);Sfur009965(Itpr);Sfur012073(CALML4);Sfur012085(Adrb2);Sfur012532(TpnC41C);Sfur013596(TpnC41C);MSTRG.38817(Itpr)	K02183+K01363+K04345+K19477+K04958+K02183+K04142+K02183+K02183+K04958
Environmental Information Processing	Signal transduction	PI3K-Akt signaling pathway	26	180	0.869239	1	ko04151	Sfur000302(Hsp90b1);Sfur000392(Hsp90b1);Sfur000630(--);Sfur001378(--);Sfur001428(--);Sfur001629(--);Sfur005096(Cwf19l1);Sfur005415(CycE);Sfur006111(--);Sfur006377(Dlish);Sfur006427(InR);Sfur006971(Agrn);Sfur007922(TEK);Sfur008731(RXR);Sfur010462(LanB2);Sfur010699(At1g62600);Sfur012601(PIK3AP1);Sfur014231(chrb);Sfur015038(PPP2R3C);Sfur015140(--);MSTRG.26165(--);MSTRG.26166(--);MSTRG.33770(--);MSTR…	K09487+K09487+K06237+K05459+K05449+K04526+K04467+K06626+K06237+K04364+K04527+K06238+K05121+K08524+K05635+K05631+K12230+K08270+K11583+K06237+K04358+K04358+K06237+K09048+K09048+K07208
Organismal Systems	Development	Osteoclast differentiation	5	42	0.873903	1	ko04380	Sfur005096(Cwf19l1);Sfur005283(JUN);Sfur006377(Dlish);Sfur011999(--);Sfur012397(CAMK4)	K04467+K04448+K04364+K03175+K05869
Cellular Processes	Cell growth and death	Cellular senescence	15	110	0.875785	1	ko04218	Sfur004029(ppp1cc-a);Sfur004157(ppp1cc-a);Sfur005342(--);Sfur005415(CycE);Sfur005723(TpnC41C);Sfur006074(Tis11);Sfur009965(Itpr);Sfur010501(sesB);Sfur012073(CALML4);Sfur012532(TpnC41C);Sfur013596(TpnC41C);Sfur013892(rad50);Sfur014179(ATM);MSTRG.38817(Itpr);MSTRG.7349(Rheb)	K06269+K06269+K04402+K06626+K02183+K18753+K04958+K05863+K02183+K02183+K02183+K10866+K04728+K04958+K07208
Environmental Information Processing	Signaling molecules and interaction	Cytokine-cytokine receptor interaction	4	35	0.877508	1	ko04060	Sfur005125(--);Sfur007797(BMPR2);Sfur012981(--);Sfur014153(MSTN)	K22628+K04671+K22679+K22679
Organismal Systems	Immune system	B cell receptor signaling pathway	4	35	0.877508	1	ko04662	Sfur005096(Cwf19l1);Sfur005283(JUN);Sfur006377(Dlish);Sfur012601(PIK3AP1)	K04467+K04448+K04364+K12230
Environmental Information Processing	Signal transduction	cAMP signaling pathway	30	209	0.891994	1	ko04024	Sfur000117(l(2)03659);Sfur001743(pde-5);Sfur001898(Gabbr1);Sfur001919(SOX9);Sfur001961(--);Sfur002752(ATP2B1);Sfur003099(grin2b);Sfur004029(ppp1cc-a);Sfur004109(ADCY9);Sfur004157(ppp1cc-a);Sfur004876(ptc);Sfur005283(JUN);Sfur005723(TpnC41C);Sfur007675(Gpr161);Sfur008504(Pka-C1);Sfur009374(CNGB1);Sfur010067(pde-5);Sfur010316(Pde7b);Sfur011763(--);Sfur012073(CALML4);Sfur012085(Adrb2);Sfur012397(CAM…	K05673+K18438+K04615+K18435+K04952+K05850+K05210+K06269+K08049+K06269+K06225+K04448+K02183+K04145+K04345+K04952+K18438+K13293+K12490+K02183+K04142+K05869+K02183+K02183+K18438+K08049+K08049+K08049+K09048+K09048
Organismal Systems	Immune system	Leukocyte transendothelial migration	6	51	0.895774	1	ko04670	Sfur001869(Act5C);Sfur003710(DDB_G0271356);Sfur003731(PXN);Sfur008253(Ptpn11);Sfur010114(sqh);Sfur013089(--)	K05692+K05760+K05760+K07293+K12757+K12757
Human Diseases	Cancers	Colorectal cancer	6	51	0.895774	1	ko05210	Sfur000480(NPEPL1);Sfur005283(JUN);Sfur005342(--);Sfur006377(Dlish);Sfur009752(BIRC6);Sfur015216(MSH2)	K02085+K04448+K04402+K04364+K08731+K08735
Metabolism	Metabolism of cofactors and vitamins	Ubiquinone and other terpenoid-quinone biosynthesis	1	12	0.8974	1	ko00130	MSTRG.19046(4CL)	K01904
Organismal Systems	Immune system	Fc gamma R-mediated phagocytosis	5	44	0.89833	1	ko04666	Sfur002555(arpc1a-b);Sfur004571(--);Sfur007457(arpc4);Sfur008871(arpc5-b);Sfur014918(Gel)	K05757+K01080+K05755+K05754+K05768
Organismal Systems	Digestive system	Carbohydrate digestion and absorption	3	29	0.899145	1	ko04973	Sfur002233(HK1);MSTRG.25617(Hex-t2);MSTRG.3014(Hex-t2)	K00844+K00844+K00844
Environmental Information Processing	Signal transduction	Calcium signaling pathway	22	159	0.899924	1	ko04020	Sfur000156(--);Sfur001371(MYLK);Sfur002752(ATP2B1);Sfur002888(Slc8a1);Sfur004109(ADCY9);Sfur005723(TpnC41C);Sfur006909(--);Sfur007032(--);Sfur008504(Pka-C1);Sfur009965(Itpr);Sfur010501(sesB);Sfur012073(CALML4);Sfur012085(Adrb2);Sfur012397(CAMK4);Sfur012532(TpnC41C);Sfur012929(5-HT7);Sfur013596(TpnC41C);MSTRG.23721(ADCY9);MSTRG.23832(ADCY9);MSTRG.23839(ADCY9);MSTRG.24009(SLC8A1);MSTRG.38817(Itpr)	K16059+K00907+K05850+K05849+K08049+K02183+K07190+K04809+K04345+K04958+K05863+K02183+K04142+K05869+K02183+K04163+K02183+K08049+K08049+K08049+K05849+K04958
Environmental Information Processing	Signal transduction	Phosphatidylinositol signaling system	16	120	0.901884	1	ko04070	Sfur001363(MTMR2);Sfur005723(TpnC41C);Sfur006056(--);Sfur006423(PI4KA);Sfur006579(PGBD2);Sfur009965(Itpr);Sfur010714(Pis);Sfur011083(pik3c3);Sfur011401(--);Sfur012073(CALML4);Sfur012532(TpnC41C);Sfur013069(--);Sfur013596(TpnC41C);Sfur014293(--);Sfur014647(--);MSTRG.38817(Itpr)	K18081+K02183+K00914+K00888+K00914+K04958+K00999+K00914+K13711+K02183+K02183+K00914+K02183+K00914+K00914+K04958
Environmental Information Processing	Signal transduction	mTOR signaling pathway	16	121	0.908554	1	ko04150	Sfur000079(RRAGA);Sfur000380(--);Sfur001376(--);Sfur001378(--);Sfur001530(--);Sfur001629(--);Sfur001985(fz2);Sfur005096(Cwf19l1);Sfur006377(Dlish);Sfur006427(InR);Sfur008260(Slc7a5);Sfur014127(Lpin1);Sfur014187(fzd10-a);Sfur014231(chrb);Sfur014686(Atp6v1e2);MSTRG.7349(Rheb)	K16185+K03875+K02152+K05459+K16184+K04526+K02375+K04467+K04364+K04527+K13780+K15728+K02842+K08270+K02150+K07208
Environmental Information Processing	Signal transduction	MAPK signaling pathway - fly	21	154	0.908915	1	ko04013	Sfur000243(Tbl1x);Sfur001261(aop);Sfur001295(tsl);Sfur001462(aop);Sfur001572(tsl);Sfur002202(Src64B);Sfur002767(Src64B);Sfur005283(JUN);Sfur005323(Mef2);Sfur006377(Dlish);Sfur007421(Rreb1);Sfur007876(bab1);Sfur008253(Ptpn11);Sfur010352(--);Sfur011162(--);Sfur011873(kay);Sfur011934(bab2);Sfur011999(--);Sfur015260(Dusp10);MSTRG.27232(--);MSTRG.34922(DUSP10)	K04508+K03211+K12377+K03211+K12377+K05704+K05704+K04448+K09260+K04364+K20210+K09237+K07293+K12378+K04506+K09031+K09237+K03175+K20216+K02104+K20216
Organismal Systems	Immune system	Th17 cell differentiation	3	30	0.911647	1	ko04659	Sfur005096(Cwf19l1);Sfur005283(JUN);Sfur008731(RXR)	K04467+K04448+K08524
Organismal Systems	Immune system	Natural killer cell mediated cytotoxicity	3	31	0.922725	1	ko04650	Sfur001362(--);Sfur006377(Dlish);Sfur008253(Ptpn11)	K17447+K04364+K07293
Human Diseases	Cardiovascular diseases	Dilated cardiomyopathy (DCM)	15	117	0.924908	1	ko05414	Sfur000915(--);Sfur001378(--);Sfur001869(Act5C);Sfur002888(Slc8a1);Sfur004109(ADCY9);Sfur008504(Pka-C1);MSTRG.10445(Mhc);MSTRG.23721(ADCY9);MSTRG.23832(ADCY9);MSTRG.23839(ADCY9);MSTRG.24009(SLC8A1);MSTRG.32159(Mylk);MSTRG.32162(unc-89);MSTRG.32164(CCDC141);MSTRG.32167(--)	K04870+K05459+K05692+K05849+K08049+K04345+K17751+K08049+K08049+K08049+K05849+K12567+K12567+K12567+K12567
Metabolism	Glycan biosynthesis and metabolism	Glycosphingolipid biosynthesis - lacto and neolacto series	1	14	0.929831	1	ko00601	Sfur000597(A4galt)	K01988
Genetic Information Processing	Translation	Ribosome biogenesis in eukaryotes	15	118	0.930376	1	ko03008	Sfur000141(--);Sfur000246(--);Sfur000349(to);Sfur000352(--);Sfur000387(anon-3B1.2);Sfur000393(to);Sfur000901(--);Sfur003977(to);Sfur004313(--);Sfur006361(CG3527);Sfur007155(--);Sfur007299(--);Sfur008178(REXO1L1);Sfur010810(Nhlrc2);Sfur014165(--)	K07936+K07936+K07936+K07936+K07936+K07936+K07936+K07936+K14530+K14568+K01164+K07936+K14570+K14539+K14561
Human Diseases	Neurodegenerative disease	Spinocerebellar ataxia	15	118	0.930376	1	ko05017	Sfur000966(OMA1);Sfur002300(nas-14);Sfur003099(grin2b);Sfur003703(At1g06840);Sfur005461(Ldlr);Sfur005841(RB1CC1);Sfur006056(--);Sfur006579(PGBD2);Sfur008091(RB1CC1);Sfur009965(Itpr);Sfur011083(pik3c3);Sfur013069(--);Sfur014293(--);Sfur014647(--);MSTRG.38817(Itpr)	K23010+K19323+K05210+K08852+K20053+K17589+K00914+K00914+K17589+K04958+K00914+K00914+K00914+K00914+K04958
Human Diseases	Cancers	Gastric cancer	10	84	0.932918	1	ko05226	Sfur000480(NPEPL1);Sfur001362(--);Sfur001985(fz2);Sfur005342(--);Sfur005415(CycE);Sfur006377(Dlish);Sfur008731(RXR);Sfur014187(fzd10-a);MSTRG.26165(--);MSTRG.26166(--)	K02085+K17447+K02375+K04402+K06626+K04364+K08524+K02842+K04358+K04358
Human Diseases	Infectious disease: bacterial	Yersinia infection	10	85	0.938684	1	ko05135	Sfur001869(Act5C);Sfur002202(Src64B);Sfur002767(Src64B);Sfur003710(DDB_G0271356);Sfur003731(PXN);Sfur005096(Cwf19l1);Sfur005283(JUN);Sfur011206(--);Sfur011999(--);Sfur013846(--)	K05692+K05704+K05704+K05760+K05760+K04467+K04448+K12800+K03175+K23612
Human Diseases	Cancers	Renal cell carcinoma	8	71	0.940388	1	ko05211	Sfur001537(ELOC);Sfur003765(--);Sfur005283(JUN);Sfur006377(Dlish);Sfur008253(Ptpn11);Sfur010434(fgt-1);MSTRG.14814(SLC2A3);MSTRG.14815(SLC2A3)	K03872+K07299+K04448+K04364+K07293+K07299+K07299+K07299
Human Diseases	Endocrine and metabolic diseases	Maturity onset diabetes of the young	1	15	0.941974	1	ko04950	Sfur001629(--)	K04526
Human Diseases	Cancers	Transcriptional misregulation in cancers	19	148	0.944208	1	ko05202	Sfur001261(aop);Sfur001378(--);Sfur001462(aop);Sfur001932(cdk14);Sfur002437(cdk9);Sfur003607(caz);Sfur005342(--);Sfur008731(RXR);Sfur009576(SS18L1);Sfur012122(stac);Sfur013364(NSD2);Sfur014179(ATM);Sfur014336(ADH2);MSTRG.27175(DDX5);MSTRG.28015(dl);MSTRG.3501(DDX17);MSTRG.39804(--);MSTRG.39806(--);MSTRG.7293(--)	K03211+K05459+K03211+K08821+K02211+K13098+K04402+K08524+K15623+K15621+K11424+K04728+K00069+K12823+K09254+K12823+K11644+K11644+K11459
Human Diseases	Immune diseases	Systemic lupus erythematosus	2	25	0.945937	1	ko05322	Sfur003099(grin2b);Sfur005278(H2AZ2)	K05210+K11251
Organismal Systems	Nervous system	Retrograde endocannabinoid signaling	13	108	0.948321	1	ko04723	Sfur002817(Y94H6A.8);Sfur003989(LHT2);Sfur004109(ADCY9);Sfur007718(Dagla);Sfur007783(--);Sfur008504(Pka-C1);Sfur009965(Itpr);Sfur010314(LHT1);Sfur013694(--);MSTRG.23721(ADCY9);MSTRG.23832(ADCY9);MSTRG.23839(ADCY9);MSTRG.38817(Itpr)	K11352+K15015+K08049+K13806+K13806+K04345+K04958+K15015+K03951+K08049+K08049+K08049+K04958
Environmental Information Processing	Signaling molecules and interaction	Neuroactive ligand-receptor interaction	23	177	0.952189	1	ko04080	Sfur001898(Gabbr1);Sfur002492(--);Sfur003099(grin2b);Sfur003173(PTH1R);Sfur003310(ggr-1);Sfur003786(PTH1R);Sfur004096(calcrl);Sfur005618(GNRHR);Sfur006906(--);Sfur007032(--);Sfur007675(Gpr161);Sfur008864(SPR);Sfur009434(DERP3);Sfur011704(Glra3);Sfur012085(Adrb2);Sfur012186(thetaTry);Sfur012488(PK1-R);Sfur012929(5-HT7);Sfur013430(--);Sfur013509(Tspo);Sfur015094(RXFP2);Sfur015418(--);MSTRG.15448(Ca…	K04615+K04307+K05210+K04585+K05195+K04585+K04577+K04280+K05204+K04809+K04145+K05052+K01312+K05194+K04142+K01312+K05052+K04163+K04609+K05770+K04307+K04240+K04577
Metabolism	Carbohydrate metabolism	Inositol phosphate metabolism	13	109	0.952497	1	ko00562	Sfur000490(--);Sfur001363(MTMR2);Sfur006056(--);Sfur006423(PI4KA);Sfur006579(PGBD2);Sfur008676(Mipp1);Sfur010714(Pis);Sfur011083(pik3c3);Sfur011401(--);Sfur013069(--);Sfur013637(miox);Sfur014293(--);Sfur014647(--)	K03103+K18081+K00914+K00888+K00914+K03103+K00999+K00914+K13711+K00914+K00469+K00914+K00914
Genetic Information Processing	Transcription	Spliceosome	20	157	0.952588	1	ko03040	Sfur000238(CHERP);Sfur000443(SmD2);Sfur000672(SRSF2);Sfur001144(Hrb87F);Sfur002293(HNRNPM);Sfur002834(PPIH);Sfur004656(Ppia);Sfur005516(LSM6);Sfur006845(Cbp80);Sfur008520(Rsf1);Sfur010216(Ppil1);Sfur010768(snRNP-U1-70K);Sfur011099(HNRNP);Sfur014004(LSM3);Sfur014771(Rbp1);Sfur015414(B52);MSTRG.27175(DDX5);MSTRG.31317(LSM2);MSTRG.32397(Hspa2);MSTRG.3501(DDX17)	K12841+K11096+K12891+K12741+K12887+K09567+K09564+K12625+K12882+K12741+K12733+K11093+K12741+K12622+K12896+K12893+K12823+K12621+K03283+K12823
Organismal Systems	Nervous system	Serotonergic synapse	7	66	0.95311	1	ko04726	Sfur000422(SLC18B1);Sfur008504(Pka-C1);Sfur009057(AAEL010734);Sfur009965(Itpr);Sfur012929(5-HT7);Sfur014303(SLC18A2);MSTRG.38817(Itpr)	K08155+K04345+K01593+K04958+K04163+K08155+K04958
Organismal Systems	Immune system	Cytosolic DNA-sensing pathway	2	26	0.9538	1	ko04623	Sfur000753(POLR3F);Sfur005096(Cwf19l1)	K03025+K04467
Organismal Systems	Immune system	Toll-like receptor signaling pathway	3	35	0.955437	1	ko04620	Sfur005096(Cwf19l1);Sfur005283(JUN);Sfur011999(--)	K04467+K04448+K03175
Human Diseases	Cancers	Endometrial cancer	3	35	0.955437	1	ko05213	Sfur000480(NPEPL1);Sfur005342(--);Sfur006377(Dlish)	K02085+K04402+K04364
Cellular Processes	Cell motility	Regulation of actin cytoskeleton	20	158	0.955895	1	ko04810	Sfur000480(NPEPL1);Sfur001371(MYLK);Sfur001629(--);Sfur001869(Act5C);Sfur002202(Src64B);Sfur002555(arpc1a-b);Sfur002767(Src64B);Sfur003710(DDB_G0271356);Sfur003731(PXN);Sfur004029(ppp1cc-a);Sfur004157(ppp1cc-a);Sfur004373(Iqgap1);Sfur007457(arpc4);Sfur008871(arpc5-b);Sfur010114(sqh);Sfur013089(--);Sfur013846(--);Sfur014918(Gel);MSTRG.26165(--);MSTRG.26166(--)	K02085+K00907+K04526+K05692+K05704+K05757+K05704+K05760+K05760+K06269+K06269+K16848+K05755+K05754+K12757+K12757+K23612+K05768+K04358+K04358
Organismal Systems	Circulatory system	Cardiac muscle contraction	7	67	0.957854	1	ko04260	Sfur000915(--);Sfur002888(Slc8a1);Sfur005773(COX5A);Sfur013176(Cox6a1);Sfur014287(COX4I2);MSTRG.10445(Mhc);MSTRG.24009(SLC8A1)	K04870+K05849+K02264+K02266+K02263+K17751+K05849
Organismal Systems	Development and regeneration	Axon regeneration	13	111	0.959974	1	ko04361	Sfur000934(--);Sfur004109(ADCY9);Sfur006427(InR);Sfur008504(Pka-C1);Sfur009057(AAEL010734);Sfur011873(kay);Sfur012505(sqz);Sfur012929(5-HT7);Sfur015015(--);Sfur015335(--);MSTRG.23721(ADCY9);MSTRG.23832(ADCY9);MSTRG.23839(ADCY9)	K23480+K08049+K04527+K04345+K01593+K09031+K23480+K04163+K23489+K23489+K08049+K08049+K08049
Human Diseases	Infectious diseases	Chagas disease (American trypanosomiasis)	4	45	0.964429	1	ko05142	Sfur000419(Calr);Sfur005096(Cwf19l1);Sfur005283(JUN);Sfur011999(--)	K08057+K04467+K04448+K03175
Metabolism	Carbohydrate metabolism	Propanoate metabolism	3	37	0.966423	1	ko00640	Sfur005215(ACADS);Sfur007714(ACAC);Sfur014797(Dbt)	K00248+K11262+K09699
Human Diseases	Infectious diseases	Influenza A	8	77	0.967645	1	ko05164	Sfur001869(Act5C);Sfur004410(FDPS);Sfur005096(Cwf19l1);Sfur009434(DERP3);Sfur010501(sesB);Sfur011206(--);Sfur012186(thetaTry);MSTRG.33278(--)	K05692+K00787+K04467+K01312+K05863+K12800+K01312+K14297
Human Diseases	Infectious diseases	Measles	5	54	0.96825	1	ko05162	Sfur005096(Cwf19l1);Sfur005283(JUN);Sfur005415(CycE);Sfur011999(--);MSTRG.32397(Hspa2)	K04467+K04448+K06626+K03175+K03283
Cellular Processes	Cellular community - eukaryotes	Signaling pathways regulating pluripotency of stem cells	9	86	0.972361	1	ko04550	Sfur000480(NPEPL1);Sfur001378(--);Sfur001985(fz2);Sfur002398(ZFHX4);Sfur006377(Dlish);Sfur007797(BMPR2);Sfur013467(Rif1);Sfur014187(fzd10-a);MSTRG.7293(--)	K02085+K05459+K02375+K09378+K04364+K04671+K11138+K02842+K11459
Human Diseases	Infectious diseases	Toxoplasmosis	4	47	0.972664	1	ko05145	Sfur005096(Cwf19l1);Sfur010462(LanB2);Sfur011999(--);MSTRG.32397(Hspa2)	K04467+K05635+K03175+K03283
Environmental Information Processing	Signal transduction	TGF-beta signaling pathway	6	64	0.975184	1	ko04350	Sfur002960(--);Sfur007797(BMPR2);Sfur013369(MAG);MSTRG.15047(--);MSTRG.15050(sog);MSTRG.15131(BAMBI)	K04658+K04671+K06766+K04657+K04657+K10162
Human Diseases	Cancers	Acute myeloid leukemia	2	31	0.979261	1	ko05221	Sfur005096(Cwf19l1);Sfur006377(Dlish)	K04467+K04364
Human Diseases	Cardiovascular diseases	Viral myocarditis	2	31	0.979261	1	ko05416	Sfur001869(Act5C);MSTRG.10445(Mhc)	K05692+K17751
Environmental Information Processing	Signal transduction	Hippo signaling pathway -fly	11	104	0.97985	1	ko04391	Sfur000982(l(2)gl);Sfur001869(Act5C);Sfur001926(hum-6);Sfur002336(ft);Sfur002901(ft);Sfur003094(ft);Sfur004483(lft);Sfur005415(CycE);Sfur007170(fj);Sfur012755(Cad89D);Sfur014580(CCDC88C)	K06094+K05692+K16677+K16669+K16669+K16669+K16673+K06626+K16674+K16669+K06091
Environmental Information Processing	Signal transduction	Notch signaling pathway	6	66	0.980444	1	ko04330	Sfur000280(cwo);Sfur003598(dx);Sfur003997(Ser);Sfur005509(Nct);Sfur006252(--);Sfur012798(Svep1)	K09091+K06058+K06052+K06171+K21635+K20995
Genetic Information Processing	Transcription	Basal transcription factors	3	41	0.981192	1	ko03022	Sfur003528(Taf2);Sfur006447(cdk20);Sfur010293(TfIIFalpha)	K03128+K02202+K03138
Genetic Information Processing	Folding, sorting and degradation	Proteasome	3	41	0.981192	1	ko03050	Sfur003933(PSMA6);Sfur009256(PSMA7);MSTRG.24079(Prosalpha2)	K02730+K02731+K02726
Cellular Processes	Cell growth and death	Ferroptosis	3	41	0.981192	1	ko04216	Sfur001656(FER1);Sfur012982(Acsl1);Sfur013958(Mvl)	K00522+K01897+K21398
Genetic Information Processing	Folding, sorting and degradation	RNA degradation	6	67	0.982666	1	ko03018	Sfur005516(LSM6);Sfur007589(BTG1);Sfur013438(Pfk);Sfur014004(LSM3);MSTRG.22416(DCPS);MSTRG.31317(LSM2)	K12625+K14443+K00850+K12622+K12584+K12621
Environmental Information Processing	Signal transduction	Hippo signaling pathway	11	106	0.983478	1	ko04390	Sfur000480(NPEPL1);Sfur000982(l(2)gl);Sfur001869(Act5C);Sfur001985(fz2);Sfur004029(ppp1cc-a);Sfur004157(ppp1cc-a);Sfur007797(BMPR2);Sfur009752(BIRC6);Sfur009753(--);Sfur014187(fzd10-a);Sfur014580(CCDC88C)	K02085+K06094+K05692+K02375+K06269+K06269+K04671+K08731+K05706+K02842+K06091
Cellular Processes	Transport and catabolism	Endocytosis	21	179	0.985077	1	ko04144	Sfur000565(SNX4);Sfur001906(ARFGEF1);Sfur002202(Src64B);Sfur002555(arpc1a-b);Sfur002767(Src64B);Sfur004248(AP2M1);Sfur004759(MFSD12);Sfur007457(arpc4);Sfur007825(RAB11FIP5);Sfur007936(Smap1);Sfur008451(CBLB);Sfur008871(arpc5-b);Sfur010052(chmp2b);Sfur011763(--);Sfur011999(--);Sfur012938(Ldlrap1);Sfur013118(--);Sfur013846(--);MSTRG.19299(Dab);MSTRG.22969(--);MSTRG.32397(Hspa2)	K17919+K18442+K05704+K05757+K05704+K11826+K12197+K05755+K12484+K12486+K04707+K05754+K12192+K12490+K03175+K12474+K18464+K23612+K12475+K04707+K03283
Cellular Processes	Transport and catabolism	Mitophagy - animal	6	70	0.987997	1	ko04137	Sfur002202(Src64B);Sfur002767(Src64B);Sfur005283(JUN);Sfur009189(ATG9A);Sfur009500(--);MSTRG.24264(BNIP3)	K05704+K05704+K04448+K17907+K17907+K15464
Human Diseases	Infectious diseases	Legionellosis	2	35	0.989236	1	ko05134	MSTRG.24264(BNIP3);MSTRG.32397(Hspa2)	K15464+K03283
Organismal Systems	Excretory system	Proximal tubule bicarbonate reclamation	1	24	0.989522	1	ko04964	Sfur012934(Gdh)	K00261
Cellular Processes	Transport and catabolism	Autophagy - other eukaryotes	9	96	0.990515	1	ko04136	Sfur006056(--);Sfur006579(PGBD2);Sfur009189(ATG9A);Sfur009500(--);Sfur011083(pik3c3);Sfur013069(--);Sfur013517(ATG16L1);Sfur014293(--);Sfur014647(--)	K00914+K00914+K17907+K17907+K00914+K00914+K17890+K00914+K00914
Organismal Systems	Sensory system	Taste transduction	2	36	0.99088	1	ko04742	Sfur001898(Gabbr1);Sfur008504(Pka-C1)	K04615+K04345
Organismal Systems	Development	Axon guidance	13	127	0.990973	1	ko04360	Sfur002202(Src64B);Sfur002767(Src64B);Sfur004876(ptc);Sfur006417(UNC5B);Sfur007797(BMPR2);Sfur008253(Ptpn11);Sfur010114(sqh);Sfur010544(zig-4);Sfur011590(XPNPEP1);Sfur013089(--);Sfur013145(dnt);Sfur013177(ApepP);Sfur013369(MAG)	K05704+K05704+K06225+K07521+K04671+K07293+K12757+K06753+K06841+K12757+K05128+K06841+K06766
Organismal Systems	Immune system	T cell receptor signaling pathway	3	46	0.99108	1	ko04660	Sfur005096(Cwf19l1);Sfur005283(JUN);Sfur006377(Dlish)	K04467+K04448+K04364
Environmental Information Processing	Signaling molecules and interaction	Cell adhesion molecules (CAMs)	10	106	0.992557	1	ko04514	Sfur000224(NLGN4Y);Sfur002128(Lar);Sfur004533(--);Sfur005332(Nrg);Sfur005567(Ars2);Sfur007520(--);Sfur011400(K02A2.6);Sfur011648(Lac);Sfur012055(KIRREL3);Sfur013369(MAG)	K07378+K05695+K06496+K06756+K07378+K06496+K06456+K06775+K06491+K06766
Human Diseases	Cardiovascular diseases	Hypertrophic cardiomyopathy (HCM)	10	107	0.993331	1	ko05410	Sfur000915(--);Sfur001378(--);Sfur001869(Act5C);Sfur002888(Slc8a1);MSTRG.10445(Mhc);MSTRG.24009(SLC8A1);MSTRG.32159(Mylk);MSTRG.32162(unc-89);MSTRG.32164(CCDC141);MSTRG.32167(--)	K04870+K05459+K05692+K05849+K17751+K05849+K12567+K12567+K12567+K12567
Human Diseases	Cancers	Pancreatic cancer	2	39	0.994473	1	ko05212	Sfur005096(Cwf19l1);Sfur005342(--)	K04467+K04402
Metabolism	Carbohydrate metabolism	Citrate cycle (TCA cycle)	13	135	0.996006	1	ko00020	Sfur000898(T05H10.6);Sfur002786(MDH2);Sfur005703(--);Sfur009701(AAEL002956);Sfur011418(Aco1);Sfur012700(Idh1);Sfur013548(PDHB);Sfur013726(IDH1);Sfur013861(--);Sfur014793(OGDH);Sfur015330(ogdh-1);MSTRG.4676(ACLY);MSTRG.4684(ACLY)	K00161+K00026+K00164+K01647+K01681+K00031+K00162+K00030+K00026+K00164+K00164+K01648+K01648
Human Diseases	Neurodegenerative diseases	Huntington disease	47	376	0.996335	1	ko05016	Sfur000269(alphaTub84B);Sfur000616(TUBB4B);Sfur001301(Dnah1);Sfur002272(alphaTub84B);Sfur002673(TUBB4B);Sfur002696(alphaTub84B);Sfur002817(Y94H6A.8);Sfur002967(DNAI2);Sfur003099(grin2b);Sfur003182(SOD1);Sfur003329(--);Sfur003666(unc-64);Sfur003703(At1g06840);Sfur004159(DCTN2-p50);Sfur004248(AP2M1);Sfur005046(betaTub60D);Sfur005578(Gpx6);Sfur005644(--);Sfur005773(COX5A);Sfur005841(RB1CC1);Sfur0060…	K07374+K07375+K10408+K07374+K07375+K07374+K11352+K11143+K05210+K04565+K04560+K04560+K08852+K10424+K11826+K07375+K00432+K10408+K02264+K17589+K04533+K00914+K00914+K10408+K10408+K17589+K04958+K10408+K05863+K10411+K00914+K07374+K07374+K10408+K00914+K02266+K03951+K10410+K02263+K00914+K00914+K07374+K09048+K09048+K04958+K11644+K11644
Genetic Information Processing	Transcription	RNA polymerase	1	30	0.996657	1	ko03020	Sfur000753(POLR3F)	K03025
Genetic Information Processing	Folding, sorting and degradation	Ubiquitin mediated proteolysis	12	129	0.99668	1	ko04120	Sfur000380(--);Sfur001474(Anapc4);Sfur001537(ELOC);Sfur004691(UBE2R2);Sfur006367(ANAPC1);Sfur008451(CBLB);Sfur008921(Rcc2);Sfur009737(UBE2L5);Sfur011162(--);Sfur011999(--);Sfur013823(UBE2L3);MSTRG.22969(--)	K03875+K03351+K03872+K02207+K03348+K04707+K10595+K04552+K04506+K03175+K04552+K04707
Organismal Systems	Immune system	Fc epsilon RI signaling pathway	1	32	0.997717	1	ko04664	Sfur006377(Dlish)	K04364
Organismal Systems	Endocrine system	GnRH secretion	3	55	0.997781	1	ko04929	Sfur001898(Gabbr1);Sfur009965(Itpr);MSTRG.38817(Itpr)	K04615+K04958+K04958
Human Diseases	Infectious diseases	Epstein-Barr virus infection	10	118	0.998095	1	ko05169	Sfur000380(--);Sfur000419(Calr);Sfur001151(PDIA3);Sfur005096(Cwf19l1);Sfur005283(JUN);Sfur005342(--);Sfur005415(CycE);Sfur011999(--);MSTRG.39804(--);MSTRG.39806(--)	K03875+K08057+K08056+K04467+K04448+K04402+K06626+K03175+K11644+K11644
Human Diseases	Infectious diseases	Herpes simplex infection	26	240	0.998257	1	ko05168	Sfur000360(--);Sfur000419(Calr);Sfur000672(SRSF2);Sfur001151(PDIA3);Sfur001964(--);Sfur002202(Src64B);Sfur002307(nub);Sfur002497(--);Sfur002767(Src64B);Sfur003764(--);Sfur003810(--);Sfur004029(ppp1cc-a);Sfur004157(ppp1cc-a);Sfur005096(Cwf19l1);Sfur006499(AANAT1);Sfur006946(--);Sfur007793(Hcfc1);Sfur008253(Ptpn11);Sfur009744(--);Sfur011999(--);Sfur013236(--);Sfur013955(--);Sfur014606(--);Sfur01477…	K09228+K08057+K12891+K08056+K09228+K05704+K09364+K09228+K05704+K09228+K09228+K06269+K06269+K04467+K09228+K09228+K14966+K07293+K09228+K03175+K09228+K09228+K02308+K12896+K12893+K07208
Genetic Information Processing	Replication and repair	Nucleotide excision repair	14	157	0.999134	1	ko03420	Sfur001038(--);Sfur001774(--);Sfur003256(Rfc5);Sfur003370(lig1);Sfur005462(RpA-70);Sfur005880(PCNA);Sfur006447(cdk20);Sfur008184(DNApol-delta);Sfur009691(DNApol-delta);Sfur010285(POLE3);Sfur011216(Pole);Sfur012120(--);Sfur012465(AAEL007634);Sfur012767(--)	K10848+K10848+K10756+K10747+K07466+K04802+K02202+K02327+K02327+K02326+K02324+K10848+K10847+K10848
Human Diseases	Neurodegenerative diseases	Alzheimer disease	45	388	0.999436	1	ko05010	Sfur000269(alphaTub84B);Sfur000480(NPEPL1);Sfur000616(TUBB4B);Sfur001629(--);Sfur001985(fz2);Sfur002272(alphaTub84B);Sfur002673(TUBB4B);Sfur002696(alphaTub84B);Sfur002817(Y94H6A.8);Sfur003099(grin2b);Sfur003703(At1g06840);Sfur005046(betaTub60D);Sfur005096(Cwf19l1);Sfur005509(Nct);Sfur005723(TpnC41C);Sfur005773(COX5A);Sfur005841(RB1CC1);Sfur006056(--);Sfur006427(InR);Sfur006579(PGBD2);Sfur007032(-…	K07374+K02085+K07375+K04526+K02375+K07374+K07375+K07374+K11352+K05210+K08852+K07375+K04467+K06171+K02183+K02264+K17589+K00914+K04527+K00914+K04809+K04550+K17589+K00134+K04958+K04532+K04532+K05863+K00914+K07374+K07374+K02183+K02183+K00914+K02266+K02183+K03951+K02842+K02263+K00914+K00914+K09054+K09054+K07374+K04958
Organismal Systems	Environmental adaptation	Thermogenesis	30	285	0.999581	1	ko04714	Sfur001415(Pnpla2);Sfur001530(--);Sfur001869(Act5C);Sfur002817(Y94H6A.8);Sfur003025(ACTL6B);Sfur004109(ADCY9);Sfur005773(COX5A);Sfur006377(Dlish);Sfur006908(Bap60);Sfur008504(Pka-C1);Sfur009822(--);Sfur010046(CPT1B);Sfur011893(SMARCC2);Sfur011918(--);Sfur012262(JMJD1C);Sfur012982(Acsl1);Sfur013176(Cox6a1);Sfur013694(--);Sfur014287(COX4I2);Sfur014542(osa);Sfur014618(KDM1A);Sfur014709(brm);MSTRG.23…	K16816+K16184+K05692+K11352+K11652+K08049+K02264+K04364+K11650+K04345+K19477+K08765+K11649+K16816+K15601+K01897+K02266+K03951+K02263+K11653+K11450+K11647+K08049+K08049+K08049+K11653+K09048+K09048+K07376+K07208
Genetic Information Processing	Translation	RNA transport	26	259	0.999696	1	ko03013	Sfur000025(--);Sfur000141(--);Sfur000246(--);Sfur000349(to);Sfur000352(--);Sfur000387(anon-3B1.2);Sfur000393(to);Sfur000549(STRAP);Sfur000901(--);Sfur002494(--);Sfur003749(rnps1-b);Sfur003977(to);Sfur004313(--);Sfur004764(RANGAP1);Sfur005717(thoc6);Sfur006845(Cbp80);Sfur007155(--);Sfur007299(--);Sfur009564(CLNS1A);Sfur010101(sumo3l);Sfur013679(--);Sfur014129(--);Sfur015099(--);MSTRG.26349(NUP43);…	K14288+K07936+K07936+K07936+K07936+K07936+K07936+K13137+K07936+K14288+K14325+K07936+K14530+K14319+K13175+K12882+K01164+K07936+K05019+K12160+K14288+K14321+K14311+K14305+K14297+K14315
Environmental Information Processing	Signal transduction	Wnt signaling pathway	13	160	0.999756	1	ko04310	Sfur000243(Tbl1x);Sfur000480(NPEPL1);Sfur001672(LHCGR);Sfur001985(fz2);Sfur003502(NLK);Sfur005283(JUN);Sfur006433(--);Sfur008504(Pka-C1);Sfur011162(--);Sfur013145(dnt);Sfur014187(fzd10-a);Sfur014188(por);MSTRG.15131(BAMBI)	K04508+K02085+K08399+K02375+K04468+K04448+K19882+K04345+K04506+K05128+K02842+K00181+K10162
Human Diseases	Cardiovascular diseases	Arrhythmogenic right ventricular cardiomyopathy (ARVC)	4	80	0.99978	1	ko05412	Sfur000915(--);Sfur001869(Act5C);Sfur002888(Slc8a1);MSTRG.24009(SLC8A1)	K04870+K05692+K05849+K05849
Genetic Information Processing	Replication and repair	Fanconi anemia pathway	9	151	0.999992	1	ko03460	Sfur001038(--);Sfur001774(--);Sfur004900(FAN1);Sfur004940(PGBD2);Sfur005462(RpA-70);Sfur011211(POLI);Sfur012120(--);Sfur012767(--);Sfur013816(FANCD2)	K10848+K10848+K15363+K10895+K07466+K03510+K10848+K10848+K10891
Human Diseases	Neurodegenerative diseases	Parkinson disease	14	199	0.999994	1	ko05012	Sfur000422(SLC18B1);Sfur002817(Y94H6A.8);Sfur003132(DAT);Sfur005773(COX5A);Sfur007675(Gpr161);Sfur008504(Pka-C1);Sfur009737(UBE2L5);Sfur010310(ple);Sfur010501(sesB);Sfur013176(Cox6a1);Sfur013694(--);Sfur013823(UBE2L3);Sfur014287(COX4I2);Sfur014303(SLC18A2)	K08155+K11352+K05036+K02264+K04145+K04345+K04552+K00501+K05863+K02266+K03951+K04552+K02263+K08155
Human Diseases	Endocrine and metabolic diseases	Non-alcoholic fatty liver disease (NAFLD)	11	186	0.999999	1	ko04932	Sfur001629(--);Sfur002817(Y94H6A.8);Sfur003703(At1g06840);Sfur005283(JUN);Sfur005716(PAQR3);Sfur005773(COX5A);Sfur006427(InR);Sfur008731(RXR);Sfur013176(Cox6a1);Sfur013694(--);Sfur014287(COX4I2)	K04526+K11352+K08852+K04448+K07297+K02264+K04527+K08524+K02266+K03951+K02263
Metabolism	Energy metabolism	Oxidative phosphorylation	11	192	1	1	ko00190	Sfur001004(atp6v0a1);Sfur001376(--);Sfur002817(Y94H6A.8);Sfur005773(COX5A);Sfur009516(ATP6V0B);Sfur011405(VhaAC39-1);Sfur013176(Cox6a1);Sfur013642(ATP6V0D1);Sfur013694(--);Sfur014287(COX4I2);Sfur014686(Atp6v1e2)	K02154+K02152+K11352+K02264+K03661+K02146+K02266+K02146+K03951+K02263+K02150
Genetic Information Processing	Translation	Ribosome	2	130	1	1	ko03010	Sfur004802(WDY);Sfur007990(RpS18)	K02988+K02964

## Sheet: PE-vs-AE
Cis
KEGG_A_class	KEGG_B_class	Pathway	cis_diff (58)	All (6457)	Pvalue	Qvalue	Pathway ID	Genes	K_IDs
Metabolism	Metabolism of cofactors and vitamins	Pantothenate and CoA biosynthesis	3	16	0.000354532	0.034035	ko00770	Sfur011355(gadl1);MSTRG.24156(PANK1);MSTRG.24157(PANK1)	K18966+K09680+K09680
Organismal Systems	Digestive system	Protein digestion and absorption	5	121	0.00441268	0.211809	ko04974	Sfur005554(Cpb2);Sfur013016(SLC7A8);MSTRG.32264(CG1139);MSTRG.32271(CG1139);MSTRG.33770(--)	K01298+K13781+K14209+K14209+K06237
Organismal Systems	Environmental adaptation	Circadian rhythm	2	18	0.0110632	0.29611	ko04710	Sfur010763(Clock);Sfur010797(Arntl)	K09026+K02296
Metabolism	Lipid metabolism	Fatty acid degradation	3	54	0.0123379	0.29611	ko00071	Sfur005767(ACAA2);Sfur014800(ACP21);Sfur015309(ACP21)	K07508+K13238+K13238
Human Diseases	Infectious diseases	Epstein-Barr virus infection	4	118	0.0210795	0.404727	ko05169	Sfur005969(PSMC4);Sfur011611(pol);MSTRG.39804(--);MSTRG.39806(--)	K03063+K06065+K11644+K11644
Metabolism	Global and overview maps	Metabolic pathways	21	1615	0.0376123	0.483895	ko01100	Sfur000597(A4galt);Sfur001308(nrf-6);Sfur001481(Oacyl);Sfur003019(--);Sfur003398(MMAB);Sfur005031(Dad1);Sfur005185(Gyg1);Sfur005767(ACAA2);Sfur006776(ASH1L);Sfur006937(LMJF_27_0420);Sfur009039(PMVK);Sfur009957(Upp1);Sfur010067(pde-5);Sfur010316(Pde7b);Sfur011283(Aldh18a1);Sfur011355(gadl1);Sfur014569(Hlcs);Sfur015411(Ugp2);MSTRG.14666(Stt3a);MSTRG.24156(PANK1);MSTRG.24157(PANK1)	K01988+K01183+K01183+K14075+K00798+K12668+K00750+K07508+K06101+K00852+K13273+K00757+K18438+K13293+K12657+K18966+K01942+K00963+K07151+K09680+K09680
Genetic Information Processing	Replication and repair	Base excision repair	2	35	0.0390416	0.483895	ko03410	MSTRG.27247(Fen1);MSTRG.33856(Ogg1)	K04799+K03660
Metabolism	Metabolism of cofactors and vitamins	Biotin metabolism	1	5	0.0441263	0.483895	ko00780	Sfur014569(Hlcs)	K01942
Metabolism	Carbohydrate metabolism	Amino sugar and nucleotide sugar metabolism	3	89	0.0453652	0.483895	ko00520	Sfur001308(nrf-6);Sfur001481(Oacyl);Sfur015411(Ugp2)	K01183+K01183+K00963
Metabolism	Carbohydrate metabolism	Starch and sucrose metabolism	2	41	0.0520056	0.499254	ko00500	Sfur005185(Gyg1);Sfur015411(Ugp2)	K00750+K00963
Genetic Information Processing	Replication and repair	DNA replication	2	46	0.0638131	0.556915	ko03030	MSTRG.14636(rnaseh2b);MSTRG.27247(Fen1)	K10744+K04799
Metabolism	Glycan biosynthesis and metabolism	N-Glycan biosynthesis	2	50	0.0738453	0.590762	ko00510	Sfur005031(Dad1);MSTRG.14666(Stt3a)	K12668+K07151
Metabolism	Glycan biosynthesis and metabolism	Various types of N-glycan biosynthesis	2	56	0.0897601	0.625577	ko00513	Sfur005031(Dad1);MSTRG.14666(Stt3a)	K12668+K07151
Metabolism	Metabolism of other amino acids	Taurine and hypotaurine metabolism	1	11	0.0945572	0.625577	ko00430	Sfur011355(gadl1)	K18966
Organismal Systems	Endocrine system	Thyroid hormone signaling pathway	3	124	0.0997878	0.625577	ko04919	Sfur013971(MED4);MSTRG.39804(--);MSTRG.39806(--)	K15146+K11644+K11644
Metabolism	Glycan biosynthesis and metabolism	Glycosphingolipid biosynthesis - globo and isoglobo series	1	13	0.110779	0.625577	ko00603	Sfur000597(A4galt)	K01988
Genetic Information Processing	Replication and repair	Non-homologous end-joining	1	13	0.110779	0.625577	ko03450	MSTRG.27247(Fen1)	K04799
Metabolism	Glycan biosynthesis and metabolism	Glycosphingolipid biosynthesis - lacto and neolacto series	1	14	0.118783	0.633508	ko00601	Sfur000597(A4galt)	K01988
Organismal Systems	Environmental adaptation	Circadian rhythm - fly	1	16	0.134578	0.668852	ko04711	Sfur010797(Arntl)	K02296
Human Diseases	Substance dependence	Morphine addiction	2	73	0.139344	0.668852	ko05032	Sfur010067(pde-5);Sfur010316(Pde7b)	K18438+K13293
Human Diseases	Cancers	Transcriptional misregulation in cancers	3	148	0.147134	0.672613	ko05202	Sfur009576(SS18L1);MSTRG.39804(--);MSTRG.39806(--)	K15623+K11644+K11644
Genetic Information Processing	Folding, sorting and degradation	Protein processing in endoplasmic reticulum	3	162	0.177605	0.708707	ko04141	Sfur002558(Pdi);Sfur005031(Dad1);MSTRG.14666(Stt3a)	K09580+K12668+K07151
Cellular Processes	Cellular community - eukaryotes	Gap junction	2	88	0.186892	0.708707	ko04540	Sfur007675(Gpr161);MSTRG.24261(TUBA4A)	K04145+K07374
Organismal Systems	Nervous system	Dopaminergic synapse	2	96	0.213123	0.708707	ko04728	Sfur007675(Gpr161);Sfur010797(Arntl)	K04145+K02296
Human Diseases	Neurodegenerative diseases	Huntington disease	5	376	0.247476	0.708707	ko05016	Sfur006024(BAHD1);Sfur008091(RB1CC1);MSTRG.24261(TUBA4A);MSTRG.39804(--);MSTRG.39806(--)	K04533+K17589+K07374+K11644+K11644
Cellular Processes	Transport and catabolism	Autophagy - animal	3	198	0.262375	0.708707	ko04140	Sfur008091(RB1CC1);Sfur013517(ATG16L1);MSTRG.24264(BNIP3)	K17589+K17890+K15464
Metabolism	Metabolism of other amino acids	beta-Alanine metabolism	1	35	0.271412	0.708707	ko00410	Sfur011355(gadl1)	K18966
Human Diseases	Infectious diseases	Legionellosis	1	35	0.271412	0.708707	ko05134	MSTRG.24264(BNIP3)	K15464
Organismal Systems	Digestive system	Pancreatic secretion	2	117	0.283193	0.708707	ko04972	Sfur003019(--);Sfur005554(Cpb2)	K14075+K01298
Metabolism	Carbohydrate metabolism	Galactose metabolism	1	37	0.284513	0.708707	ko00052	Sfur015411(Ugp2)	K00963
Environmental Information Processing	Signal transduction	cAMP signaling pathway	3	209	0.289398	0.708707	ko04024	Sfur007675(Gpr161);Sfur010067(pde-5);Sfur010316(Pde7b)	K04145+K18438+K13293
Metabolism	Carbohydrate metabolism	Pentose phosphate pathway	1	38	0.290977	0.708707	ko00030	Sfur006937(LMJF_27_0420)	K00852
Metabolism	Lipid metabolism	Steroid biosynthesis	1	38	0.290977	0.708707	ko00100	Sfur000881(Lip1)	K01052
Organismal Systems	Digestive system	Mineral absorption	1	39	0.297384	0.708707	ko04978	Sfur008868(ATOX1)	K07213
Metabolism	Metabolism of terpenoids and polyketides	Terpenoid backbone biosynthesis	1	40	0.303733	0.708707	ko00900	Sfur009039(PMVK)	K13273
Human Diseases	Substance dependence	Cocaine addiction	1	40	0.303733	0.708707	ko05030	Sfur007675(Gpr161)	K04145
Metabolism	Lipid metabolism	Fatty acid elongation	1	41	0.310027	0.708707	ko00062	Sfur005767(ACAA2)	K07508
Genetic Information Processing	Folding, sorting and degradation	Proteasome	1	41	0.310027	0.708707	ko03050	Sfur005969(PSMC4)	K03063
Metabolism	Nucleotide metabolism	Pyrimidine metabolism	1	45	0.334645	0.708707	ko00240	Sfur009957(Upp1)	K00757
Metabolism	Carbohydrate metabolism	Pentose and glucuronate interconversions	1	46	0.340664	0.708707	ko00040	Sfur015411(Ugp2)	K00963
Metabolism	Metabolism of cofactors and vitamins	Porphyrin and chlorophyll metabolism	1	46	0.340664	0.708707	ko00860	Sfur003398(MMAB)	K00798
Metabolism	Amino acid metabolism	Valine, leucine and isoleucine degradation	1	47	0.346629	0.708707	ko00280	Sfur005767(ACAA2)	K07508
Metabolism	Nucleotide metabolism	Purine metabolism	2	142	0.365975	0.708707	ko00230	Sfur010067(pde-5);Sfur010316(Pde7b)	K18438+K13293
Metabolism	Amino acid metabolism	Arginine and proline metabolism	1	52	0.375667	0.708707	ko00330	Sfur011283(Aldh18a1)	K12657
Human Diseases	Drug resistance	Antifolate resistance	1	52	0.375667	0.708707	ko01523	Sfur010345(abcG23)	K05665
Environmental Information Processing	Signal transduction	Rap1 signaling pathway	2	150	0.39181	0.708707	ko04015	Sfur007675(Gpr161);Sfur015212(C3G)	K04145+K06277
Cellular Processes	Cellular community - eukaryotes	Focal adhesion	2	150	0.39181	0.708707	ko04510	Sfur015212(C3G);MSTRG.33770(--)	K06277+K06237
Genetic Information Processing	Translation	RNA transport	3	259	0.413067	0.708707	ko03013	Sfur007299(--);Sfur010101(sumo3l);MSTRG.33278(--)	K07936+K12160+K14297
Human Diseases	Cancers	Small cell lung cancer	1	61	0.424775	0.708707	ko05222	MSTRG.33770(--)	K06237
Organismal Systems	Digestive system	Fat digestion and absorption	1	65	0.445362	0.708707	ko04975	Sfur003019(--)	K14075
Environmental Information Processing	Signal transduction	Notch signaling pathway	1	66	0.450395	0.708707	ko04330	Sfur011611(pol)	K06065
Genetic Information Processing	Folding, sorting and degradation	RNA degradation	1	67	0.455383	0.708707	ko03018	Sfur011288(EXOSC7)	K12589
Environmental Information Processing	Signal transduction	Sphingolipid signaling pathway	1	69	0.465225	0.708707	ko04071	Sfur010345(abcG23)	K05665
Cellular Processes	Transport and catabolism	Mitophagy - animal	1	70	0.470081	0.708707	ko04137	MSTRG.24264(BNIP3)	K15464
Human Diseases	Endocrine and metabolic diseases	AGE-RAGE signaling pathway in diabetic complications	1	71	0.474893	0.708707	ko04933	MSTRG.33770(--)	K06237
Human Diseases	Cancers	Renal cell carcinoma	1	71	0.474893	0.708707	ko05211	Sfur015212(C3G)	K06277
Organismal Systems	Digestive system	Cholesterol metabolism	1	72	0.479662	0.708707	ko04979	Sfur000881(Lip1)	K01052
Organismal Systems	Nervous system	Neurotrophin signaling pathway	1	73	0.484389	0.708707	ko04722	Sfur015212(C3G)	K06277
Metabolism	Global and overview maps	Biosynthesis of amino acids	1	74	0.489073	0.708707	ko01230	Sfur011283(Aldh18a1)	K12657
Cellular Processes	Transport and catabolism	Lysosome	2	182	0.490021	0.708707	ko04142	Sfur000424(CG17119);Sfur000881(Lip1)	K12386+K01052
Human Diseases	Infectious diseases	Amoebiasis	1	75	0.493716	0.708707	ko05146	MSTRG.33770(--)	K06237
Metabolism	Xenobiotics biodegradation and metabolism	Drug metabolism - other enzymes	1	76	0.498317	0.708707	ko00983	Sfur009957(Upp1)	K00757
Organismal Systems	Endocrine system	Parathyroid hormone synthesis, secretion and action	1	77	0.502877	0.708707	ko04928	Sfur010316(Pde7b)	K13293
Organismal Systems	Digestive system	Vitamin digestion and absorption	1	77	0.502877	0.708707	ko04977	Sfur010345(abcG23)	K05665
Human Diseases	Infectious diseases	Influenza A	1	77	0.502877	0.708707	ko05164	MSTRG.33278(--)	K14297
Metabolism	Lipid metabolism	Glycerolipid metabolism	1	79	0.511875	0.708707	ko00561	Sfur003019(--)	K14075
Environmental Information Processing	Signaling molecules and interaction	ECM-receptor interaction	1	79	0.511875	0.708707	ko04512	MSTRG.33770(--)	K06237
Organismal Systems	Aging	Longevity regulating pathway - mammal	1	80	0.516314	0.708707	ko04211	Sfur008091(RB1CC1)	K17589
Environmental Information Processing	Membrane transport	ABC transporters	1	82	0.525073	0.708707	ko02010	Sfur010345(abcG23)	K05665
Metabolism	Amino acid metabolism	Lysine degradation	1	85	0.53792	0.708707	ko00310	Sfur006776(ASH1L)	K06101
Environmental Information Processing	Signal transduction	FoxO signaling pathway	1	85	0.53792	0.708707	ko04068	MSTRG.24264(BNIP3)	K15464
Human Diseases	Cardiovascular diseases	Fluid shear stress and atherosclerosis	1	85	0.53792	0.708707	ko05418	Sfur010101(sumo3l)	K12160
Human Diseases	Infectious diseases	Shigellosis	2	201	0.543629	0.708707	ko05131	Sfur013517(ATG16L1);MSTRG.24264(BNIP3)	K17890+K15464
Cellular Processes	Cell growth and death	Apoptosis	1	87	0.546295	0.708707	ko04210	MSTRG.24261(TUBA4A)	K07374
Organismal Systems	Immune system	NOD-like receptor signaling pathway	1	89	0.55452	0.709785	ko04621	Sfur013517(ATG16L1)	K17890
Human Diseases	Substance dependence	Alcoholism	1	93	0.570533	0.720673	ko05034	Sfur007675(Gpr161)	K04145
Cellular Processes	Transport and catabolism	Autophagy - other eukaryotes	1	96	0.58217	0.725823	ko04136	Sfur013517(ATG16L1)	K17890
Metabolism	Global and overview maps	Fatty acid metabolism	1	100	0.597206	0.730184	ko01212	Sfur005767(ACAA2)	K07508
Organismal Systems	Endocrine system	Relaxin signaling pathway	1	101	0.600881	0.730184	ko04926	MSTRG.33770(--)	K06237
Human Diseases	Infectious diseases	Herpes simplex infection	2	240	0.641269	0.748881	ko05168	Sfur006946(--);Sfur011575(insm1)	K09228+K09228
Cellular Processes	Transport and catabolism	Peroxisome	1	114	0.64576	0.748881	ko04146	Sfur009039(PMVK)	K13273
Genetic Information Processing	Translation	Ribosome biogenesis in eukaryotes	1	118	0.658543	0.748881	ko03008	Sfur007299(--)	K07936
Cellular Processes	Cell growth and death	Cell cycle	1	118	0.658543	0.748881	ko04110	Sfur009486(CDC6)	K02213
Human Diseases	Neurodegenerative disease	Spinocerebellar ataxia	1	118	0.658543	0.748881	ko05017	Sfur008091(RB1CC1)	K17589
Human Diseases	Infectious diseases	Pathogenic Escherichia coli infection	1	122	0.670872	0.748881	ko05130	MSTRG.24261(TUBA4A)	K07374
Human Diseases	Cancers	MicroRNAs in cancer	1	122	0.670872	0.748881	ko05206	Sfur010345(abcG23)	K05665
Cellular Processes	Cellular community - eukaryotes	Tight junction	1	129	0.691404	0.762929	ko04530	MSTRG.24261(TUBA4A)	K07374
Organismal Systems	Endocrine system	Insulin signaling pathway	1	133	0.702566	0.763683	ko04910	Sfur015212(C3G)	K06277
Cellular Processes	Transport and catabolism	Phagosome	1	135	0.707998	0.763683	ko04145	MSTRG.24261(TUBA4A)	K07374
Human Diseases	Infectious diseases	HTLV-I infection	1	150	0.74574	0.795456	ko05166	Sfur007299(--)	K07936
Environmental Information Processing	Signaling molecules and interaction	Neuroactive ligand-receptor interaction	1	177	0.801975	0.842516	ko04080	Sfur007675(Gpr161)	K04145
Environmental Information Processing	Signal transduction	PI3K-Akt signaling pathway	1	180	0.807411	0.842516	ko04151	MSTRG.33770(--)	K06237
Human Diseases	Neurodegenerative diseases	Parkinson disease	1	199	0.838594	0.865645	ko05012	Sfur007675(Gpr161)	K04145
Human Diseases	Neurodegenerative diseases	Alzheimer disease	2	388	0.871789	0.882554	ko05010	Sfur008091(RB1CC1);MSTRG.24261(TUBA4A)	K17589+K07374
Human Diseases	Infectious diseases	Human papillomavirus infection	1	225	0.873361	0.882554	ko05165	MSTRG.33770(--)	K06237
Human Diseases	Cancers	Pathways in cancer	1	285	0.92793	0.92793	ko05200	MSTRG.33770(--)	K06237
Trans
KEGG_A_class	KEGG_B_class	Pathway	trans (1186)	All (6457)	Pvalue	Qvalue	Pathway ID	Genes	K_IDs
Metabolism	Lipid metabolism	Fatty acid elongation	28	41	2.80317e-12	9.30652e-10	ko00062	Sfur000047(AAEL008004);Sfur000110(Ppt2);Sfur000119(ELOVL4);Sfur000188(AAEL008004);Sfur000240(HADHB);Sfur000268(AAEL008004);Sfur000273(AAEL008004);Sfur000301(AAEL008004);Sfur000337(AAEL008004);Sfur000400(AAEL008004);Sfur001418(AAEL008004);Sfur001468(ELOVL4);Sfur002072(Ppt1);Sfur002488(Elovl7);Sfur002746(Hsd17b12);Sfur005244(ELOVL);Sfur005767(ACAA2);Sfur006731(ELOVL4);Sfur007538(hsd17b12);Sfur01146…	K10250+K01074+K10249+K10250+K07509+K10250+K10250+K10250+K10250+K10250+K10250+K10249+K01074+K10250+K10251+K10247+K07508+K10249+K10251+K10249+K10250+K10250+K10249+K10250+K10250+K07508+K10250+K07511
Metabolism	Carbohydrate metabolism	Amino sugar and nucleotide sugar metabolism	40	89	5.93836e-09	8.0532e-07	ko00520	Sfur001067(--);Sfur001256(--);Sfur001308(nrf-6);Sfur001356(nrf-6);Sfur001372(--);Sfur001403(nrf-6);Sfur001481(Oacyl);Sfur001520(CHIA);Sfur001650(Oscillin);Sfur001670(fdl);Sfur001692(--);Sfur002041(Pgi);Sfur002233(HK1);Sfur004784(Gfpt2);Sfur006684(nrf-6);Sfur006894(Gnpnat);Sfur007226(--);Sfur007883(rhy-1);Sfur008452(Chia);Sfur008604(chs-2);Sfur010701(Gmd);Sfur011415(nrf-6);Sfur013893(PGM3);Sfur014…	K01183+K01183+K01183+K01183+K01183+K01183+K01183+K01183+K02564+K12373+K01183+K01810+K00844+K00820+K01183+K00621+K01183+K01183+K01183+K00698+K01711+K01183+K01836+K15779+K01183+K01183+K01809+K01183+K01183+K00963+K21749+K01183+K01183+K00963+K01183+K01183+K01183+K00844+K00844+K02377
Genetic Information Processing	Replication and repair	DNA replication	26	46	7.27699e-09	8.0532e-07	ko03030	Sfur000070(pola1);Sfur000071(Mcm7);Sfur000145(Mcm7);Sfur000741(Mes4);Sfur001674(mtSSB);Sfur002315(dpa);Sfur003256(Rfc5);Sfur003370(lig1);Sfur005462(RpA-70);Sfur005880(PCNA);Sfur008184(DNApol-delta);Sfur008486(DNApol-alpha60);Sfur008919(--);Sfur009691(DNApol-delta);Sfur010285(POLE3);Sfur011216(Pole);Sfur011647(Mcm5);Sfur011884(RFC4);Sfur011933(POLE2);Sfur013322(Myg1);Sfur013773(Mcm3);Sfur015063(Mc…	K02320+K02210+K02210+K03506+K03111+K02212+K10756+K10747+K07466+K04802+K02327+K02685+K10745+K02327+K02326+K02324+K02209+K10755+K02325+K10754+K02541+K02540+K10744+K04799+K02542+K02542
Metabolism	Global and overview maps	Metabolic pathways	369	1615	8.07021e-08	6.28283e-06	ko01100	Sfur000047(AAEL008004);Sfur000110(Ppt2);Sfur000111(Arsb);Sfur000119(ELOVL4);Sfur000157(HAO1);Sfur000188(AAEL008004);Sfur000193(Pnliprp2);Sfur000207(HMGCS1);Sfur000240(HADHB);Sfur000262(Nnt);Sfur000268(AAEL008004);Sfur000273(AAEL008004);Sfur000301(AAEL008004);Sfur000330(D11DS);Sfur000337(AAEL008004);Sfur000343(Alg9);Sfur000347(NNT);Sfur000372(CTH);Sfur000400(AAEL008004);Sfur000471(ATIC);Sfur000483…	K10250+K01074+K01135+K10249+K11517+K10250+K14073+K01641+K07509+K00323+K10250+K10250+K10250+K00507+K10250+K03846+K00323+K01758+K10250+K00602+K00873+K03103+K01194+K01047+K01988+K22203+K16860+K03331+K03331+K18123+K00161+K22203+K02154+K01988+K01922+K01183+K13485+K11153+K00011+K01183+K01183+K01183+K00453+K12318+K01183+K00669+K01183+K16816+K10250+K10249+K01183+K01204+K01183+K01189+K02564+K12373+K01183+…
Metabolism	Global and overview maps	Fatty acid metabolism	41	100	9.4621e-08	6.28283e-06	ko01212	Sfur000047(AAEL008004);Sfur000110(Ppt2);Sfur000119(ELOVL4);Sfur000188(AAEL008004);Sfur000240(HADHB);Sfur000268(AAEL008004);Sfur000273(AAEL008004);Sfur000301(AAEL008004);Sfur000330(D11DS);Sfur000337(AAEL008004);Sfur000400(AAEL008004);Sfur001418(AAEL008004);Sfur001468(ELOVL4);Sfur002072(Ppt1);Sfur002488(Elovl7);Sfur002528(Fasn);Sfur002746(Hsd17b12);Sfur005244(ELOVL);Sfur005767(ACAA2);Sfur006731(ELO…	K10250+K01074+K10249+K10250+K07509+K10250+K10250+K10250+K00507+K10250+K10250+K10250+K10249+K01074+K10250+K00665+K10251+K10247+K07508+K10249+K00665+K10251+K11262+K08765+K10249+K10250+K10250+K00507+K00665+K01897+K00507+K00507+K00507+K00507+K10249+K22540+K10250+K10250+K07508+K10250+K07511
Metabolism	Lipid metabolism	Biosynthesis of unsaturated fatty acids	28	58	1.81617e-07	1.00495e-05	ko01040	Sfur000047(AAEL008004);Sfur000119(ELOVL4);Sfur000188(AAEL008004);Sfur000268(AAEL008004);Sfur000273(AAEL008004);Sfur000301(AAEL008004);Sfur000330(D11DS);Sfur000337(AAEL008004);Sfur000400(AAEL008004);Sfur001418(AAEL008004);Sfur001468(ELOVL4);Sfur002488(Elovl7);Sfur002746(Hsd17b12);Sfur005244(ELOVL);Sfur006731(ELOVL4);Sfur007538(hsd17b12);Sfur011462(Elovl1);Sfur011911(ELOVL4);Sfur012302(ELOVL7);Sfur…	K10250+K10249+K10250+K10250+K10250+K10250+K00507+K10250+K10250+K10250+K10249+K10250+K10251+K10247+K10249+K10251+K10249+K10250+K10250+K00507+K00507+K00507+K00507+K00507+K10249+K10250+K10250+K10250
Metabolism	Lipid metabolism	Fatty acid degradation	23	54	3.04643e-05	0.00133262	ko00071	Sfur000240(HADHB);Sfur002897(Eci2);Sfur005767(ACAA2);Sfur005894(ACP21);Sfur005937(--);Sfur005967(ACP20);Sfur005972(ACP20);Sfur006039(Ccp84Ab);Sfur006062(ACP20);Sfur006128(ACP21);Sfur006176(ACP21);Sfur010046(CPT1B);Sfur012982(Acsl1);Sfur013135(Aldh2);Sfur014404(ACP21);Sfur014594(Ccp84Ab);Sfur014800(ACP21);Sfur015119(Edg84A);Sfur015256(Edg84A);Sfur015309(ACP21);MSTRG.15727(ACAA2);MSTRG.29894(ECHS1)…	K07509+K13239+K07508+K13238+K13238+K13238+K13238+K13238+K13238+K13238+K13238+K08765+K01897+K00128+K13238+K13238+K13238+K13238+K13238+K13238+K07508+K07511+K00128
Metabolism	Metabolism of terpenoids and polyketides	Insect hormone biosynthesis	19	41	3.61251e-05	0.00133262	ko00981	Sfur000511(--);Sfur001410(Est-6);Sfur001442(Ces2e);Sfur001617(Est-6);Sfur002078(jhamt);Sfur003804(sad);Sfur003828(phm);Sfur010134(EH2);Sfur010575(Cyp305a1);Sfur010874(Cyp303a1);Sfur011561(spo);Sfur012080(daf-36);Sfur013053(Dhrs11);Sfur013135(Aldh2);Sfur013403(DHRS11);Sfur014254(spo);Sfur014382(dib);MSTRG.22713(SAR2567);MSTRG.5712(aldA)	K15825+K01063+K01063+K01063+K10718+K10722+K10720+K10719+K14937+K14937+K14939+K14938+K15890+K00128+K15890+K14939+K10721+K15890+K00128
Genetic Information Processing	Folding, sorting and degradation	Proteasome	19	41	3.61251e-05	0.00133262	ko03050	Sfur001115(Psmd12);Sfur001192(Dox-A2);Sfur001473(--);Sfur002544(Psmb7);Sfur003933(PSMA6);Sfur004404(PSMA4);Sfur004788(Psmb2);Sfur005969(PSMC4);Sfur009256(PSMA7);Sfur009493(PSMB6);Sfur010237(PSMB1);Sfur011510(Rpt2);Sfur011797(psmc3-a);Sfur012816(PSMD2);Sfur013245(PSMD14);Sfur014778(Psma6);MSTRG.12125(PSMB5);MSTRG.13331(Psma1);MSTRG.24079(Prosalpha2)	K03035+K03033+K11599+K02739+K02730+K02728+K02734+K03063+K02731+K02738+K02732+K03062+K03065+K03028+K03030+K02730+K02737+K02725+K02726
Metabolism	Lipid metabolism	Glycerolipid metabolism	29	79	8.37273e-05	0.00277975	ko00561	Sfur000193(Pnliprp2);Sfur001205(AKR1B1);Sfur001415(Pnpla2);Sfur001643(NAGA);Sfur001890(PNLIP);Sfur001986(AKR1B8);Sfur002850(PNLIP);Sfur002974(PNLIP);Sfur003019(--);Sfur003979(PNLIPRP2);Sfur004571(--);Sfur010070(Lip1);Sfur011683(MFSD10);Sfur011918(--);Sfur012014(--);Sfur012970(GPAM);Sfur013135(Aldh2);Sfur013672(LCLAT1);Sfur013911(PNLIP);Sfur014127(Lpin1);Sfur014230(Pnliprp1);Sfur014232(Pnliprp1);S…	K14073+K00011+K16816+K01189+K14075+K00002+K14076+K14073+K14075+K14073+K01080+K14452+K13506+K16816+K16816+K00629+K00128+K13513+K14073+K15728+K14073+K14073+K14073+K00863+K00863+K01080+K14074+K14074+K00128
Genetic Information Processing	Folding, sorting and degradation	Protein processing in endoplasmic reticulum	49	162	0.000140436	0.00389393	ko04141	Sfur000209(Uggt);Sfur000302(Hsp90b1);Sfur000392(Hsp90b1);Sfur000419(Calr);Sfur001151(PDIA3);Sfur001369(Plaa);Sfur001421(SSR3);Sfur002132(SSR1);Sfur002558(Pdi);Sfur004777(TER94);Sfur004863(SEC24C);Sfur004918(PRKCSH);Sfur005031(Dad1);Sfur005571(Ssr2);Sfur005584(RLBP1);Sfur005985(Sec63);Sfur005994(SEC61G);Sfur006371(hyou1);Sfur006380(SEC61A2);Sfur006701(--);Sfur006786(TTPAL);Sfur006915(Uggt);Sfur006…	K11718+K09487+K09487+K08057+K08056+K14018+K13251+K13249+K09580+K13525+K14007+K08288+K12668+K13250+K09586+K09540+K07342+K09486+K10956+K09586+K09586+K11718+K09586+K09586+K10080+K12666+K09481+K05546+K23741+K07151+K04571+K01228+K14005+K09584+K12667+K13984+K14010+K12666+K09054+K09054+K07151+K11718+K11718+K03283+K09490+K09490+K09586+K03283+K03283
Genetic Information Processing	Folding, sorting and degradation	Protein export	14	28	0.000140744	0.00389393	ko03060	Sfur000867(SEC11A);Sfur000897(Srp19);Sfur001681(Spase22-23);Sfur005985(Sec63);Sfur005994(SEC61G);Sfur006380(SEC61A2);Sfur008193(spcs2);Sfur008961(SEC61B);Sfur009184(spcs2);Sfur009255(ZK512.4);Sfur011421(SRP72);Sfur012613(mblac1);MSTRG.34003(Hsc70-3);MSTRG.34004(Hsc70-3)	K13280+K03105+K12948+K09540+K07342+K10956+K12947+K09481+K12947+K03109+K03108+K12946+K09490+K09490
Metabolism	Carbohydrate metabolism	Fructose and mannose metabolism	15	32	0.000204977	0.0052348	ko00051	Sfur001205(AKR1B1);Sfur002233(HK1);Sfur010701(Gmd);Sfur011572(enosf1);Sfur012384(Sord);Sfur012647(Pfkfb1);Sfur013438(Pfk);Sfur014564(MPI);Sfur015008(TKFC);Sfur015029(Ald1);Sfur015056(TKFC);Sfur015261(aldo-2);MSTRG.25617(Hex-t2);MSTRG.3014(Hex-t2);MSTRG.613(TSTA3)	K00011+K00844+K01711+K18334+K00008+K01103+K00850+K01809+K00863+K01623+K00863+K01623+K00844+K00844+K02377
Organismal Systems	Immune system	Complement and coagulation cascades	15	33	0.000312647	0.00741421	ko04610	Sfur002145(PPAF2);Sfur004229(Eppin);Sfur006268(Ppn);Sfur007267(Klkb1);Sfur007344(flz);Sfur008378(--);Sfur011321(mas);Sfur011836(mas);Sfur013522(flz);Sfur014057(TMPRSS15);MSTRG.28022(Ppn);MSTRG.36866(F10);MSTRG.36868(OVCH2);MSTRG.4940(Tmprss11c);MSTRG.4941(ST14)	K01344+K03909+K03909+K01324+K01324+K01324+K01324+K01324+K01324+K01324+K03909+K01324+K01324+K01321+K01321
Organismal Systems	Digestive system	Vitamin digestion and absorption	27	77	0.000348003	0.00770247	ko04977	Sfur000193(Pnliprp2);Sfur001001(SCARB1);Sfur002974(PNLIP);Sfur003100(pes);Sfur003517(--);Sfur003979(PNLIPRP2);Sfur004713(PLB1);Sfur005328(SLC46A1);Sfur005329(PLB1);Sfur005568(PLB1);Sfur005842(pes);Sfur007895(SCARB2);Sfur008420(slc23a2);Sfur009985(abcG23);Sfur010095(apolpp);Sfur010215(abcG23);Sfur010345(abcG23);Sfur010548(abcG23);Sfur010905(abcG23);Sfur011825(vanin-like);Sfur011914(ABCC1);Sfur0125…	K14073+K13885+K14073+K13885+K13885+K14073+K14621+K14613+K14621+K14621+K13885+K13885+K14611+K05665+K14462+K05665+K05665+K05665+K05665+K01435+K05665+K05665+K14073+K14073+K14073+K14073+K13885
Organismal Systems	Digestive system	Cholesterol metabolism	25	72	0.000673634	0.0132435	ko04979	Sfur000033(FAM43A);Sfur000881(Lip1);Sfur001001(SCARB1);Sfur001590(Lip1);Sfur002002(--);Sfur002482(--);Sfur002672(Lrp2);Sfur003100(pes);Sfur003517(--);Sfur003906(Lip1);Sfur003909(--);Sfur004150(Ptchd3);Sfur005842(pes);Sfur006300(Lip1);Sfur006408(NT1);Sfur007288(LRP1);Sfur007895(SCARB2);Sfur010095(apolpp);Sfur010427(Lip3);Sfur010830(Lip3);Sfur012938(Ldlrap1);Sfur013509(Tspo);Sfur013903(--);MSTRG.35…	K12474+K01052+K13885+K01052+K06233+K00637+K06233+K13885+K13885+K01052+K01052+K12385+K13885+K01052+K01052+K04550+K13885+K14462+K01052+K01052+K12474+K05770+K22290+K01052+K13885
Genetic Information Processing	Replication and repair	Base excision repair	15	35	0.000678132	0.0132435	ko03410	Sfur000067(Parp);Sfur000741(Mes4);Sfur002845(Xrcc1);Sfur003370(lig1);Sfur005880(PCNA);Sfur008184(DNApol-delta);Sfur009691(DNApol-delta);Sfur010285(POLE3);Sfur011216(Pole);Sfur011933(POLE2);Sfur012031(smug1);Sfur012496(Ung);Sfur015092(Rrp1);MSTRG.27247(Fen1);MSTRG.33856(Ogg1)	K24070+K03506+K10803+K10747+K04802+K02327+K02327+K02326+K02324+K02325+K10800+K03648+K10771+K04799+K03660
Organismal Systems	Digestive system	Fat digestion and absorption	23	65	0.000809233	0.0149258	ko04975	Sfur000193(Pnliprp2);Sfur000526(--);Sfur001001(SCARB1);Sfur001890(PNLIP);Sfur002974(PNLIP);Sfur003019(--);Sfur003100(pes);Sfur003362(--);Sfur003517(--);Sfur003979(PNLIPRP2);Sfur004571(--);Sfur005842(pes);Sfur007895(SCARB2);Sfur010070(Lip1);Sfur010095(apolpp);Sfur013911(PNLIP);Sfur014230(Pnliprp1);Sfur014232(Pnliprp1);Sfur014832(Lipg);MSTRG.17006(PLPP1);MSTRG.28763(PNLIPRP1);MSTRG.28765(PNLIPRP1);…	K14073+K01047+K13885+K14075+K14073+K14075+K13885+K01047+K13885+K14073+K01080+K13885+K13885+K14452+K14462+K14073+K14073+K14073+K14073+K01080+K14074+K14074+K13885
Metabolism	Carbohydrate metabolism	Galactose metabolism	15	37	0.00135538	0.0236835	ko00052	Sfur001205(AKR1B1);Sfur001643(NAGA);Sfur002233(HK1);Sfur013438(Pfk);Sfur014064(PGM2);Sfur014540(GLB1);Sfur014743(UGP2);Sfur015411(Ugp2);MSTRG.13192(mro);MSTRG.25617(Hex-t2);MSTRG.2654(SI);MSTRG.3014(Hex-t2);MSTRG.30284(Gaa);MSTRG.3233(SI);MSTRG.3238(GAA)	K00011+K01189+K00844+K00850+K15779+K12309+K00963+K00963+K01785+K00844+K12316+K00844+K12316+K12316+K12316
Metabolism	Nucleotide metabolism	Pyrimidine metabolism	17	45	0.00167895	0.0278705	ko00240	Sfur002569(PNP);Sfur002601(RnrS);Sfur003438(r);Sfur004945(AK9);Sfur005404(Rrm1);Sfur007112(lmo0130);Sfur007230(TK2);Sfur007449(DPYS);Sfur009957(Upp1);Sfur010670(awd);Sfur011998(NT5C2);Sfur012203(ZEU1);Sfur013292(nt5dc3);Sfur014200(DUT);MSTRG.13082(UPRT);MSTRG.13338(Tyms);MSTRG.36688(UPP2)	K03783+K10808+K11540+K18533+K10807+K01081+K00857+K01464+K00757+K00940+K01081+K00943+K01081+K01520+K00761+K00560+K00757
Genetic Information Processing	Replication and repair	Mismatch repair	11	25	0.00273398	0.043223	ko03430	Sfur001674(mtSSB);Sfur003256(Rfc5);Sfur003370(lig1);Sfur005462(RpA-70);Sfur005880(PCNA);Sfur008184(DNApol-delta);Sfur009691(DNApol-delta);Sfur011884(RFC4);Sfur013322(Myg1);Sfur014494(tos);Sfur015216(MSH2)	K03111+K10756+K10747+K07466+K04802+K02327+K02327+K10755+K10754+K10746+K08735
Organismal Systems	Immune system	Antigen processing and presentation	14	36	0.00309118	0.0466488	ko04612	Sfur000419(Calr);Sfur001151(PDIA3);Sfur004779(ifi30);Sfur005885(cfaD);Sfur007067(TINAGL1);Sfur010354(GILT1);Sfur010772(ifi30);Sfur012583(ifi30);Sfur014756(Cp1);Sfur014816(Cp1);Sfur014836(Cp1);MSTRG.32397(Hspa2);MSTRG.4355(HSP70B2);MSTRG.4356(HSP70B2)	K08057+K08056+K08059+K01365+K01363+K08059+K08059+K08059+K01365+K01365+K01365+K03283+K03283+K03283
Metabolism	Carbohydrate metabolism	Starch and sucrose metabolism	15	41	0.0044251	0.0638754	ko00500	Sfur000494(tre1);Sfur002041(Pgi);Sfur002233(HK1);Sfur005185(Gyg1);Sfur007891(Treh);Sfur011156(tpsA);Sfur014064(PGM2);Sfur014743(UGP2);Sfur015411(Ugp2);MSTRG.25617(Hex-t2);MSTRG.2654(SI);MSTRG.3014(Hex-t2);MSTRG.30284(Gaa);MSTRG.3233(SI);MSTRG.3238(GAA)	K01194+K01810+K00844+K00750+K01194+K16055+K15779+K00963+K00963+K00844+K12316+K00844+K12316+K12316+K12316
Metabolism	Metabolism of other amino acids	Glutathione metabolism	19	57	0.00482896	0.0668006	ko00480	Sfur002601(RnrS);Sfur005336(GstS1);Sfur005404(Rrm1);Sfur005578(Gpx6);Sfur005641(LAP3);Sfur006110(lap3);Sfur006841(PTGES);Sfur008774(LAP3);Sfur009105(LAP3);Sfur012117(--);Sfur012202(Ggt7);Sfur012644(lap3);Sfur012700(Idh1);Sfur014216(GST1);Sfur014260(lap3);Sfur014763(lap3);MSTRG.13171(GGCT);MSTRG.27383(se);MSTRG.35605(ANPEP)	K10808+K04097+K10807+K00432+K11142+K11142+K00799+K11142+K11142+K11140+K00681+K11142+K00031+K00799+K11142+K11142+K00682+K00310+K11140
Cellular Processes	Transport and catabolism	Peroxisome	32	114	0.00684673	0.0909246	ko04146	Sfur000157(HAO1);Sfur001025(wat);Sfur001691(Pex16);Sfur001994(--);Sfur002862(Far1);Sfur002897(Eci2);Sfur003142(MVK);Sfur003182(SOD1);Sfur004407(XDH);Sfur006389(wat);Sfur006756(CG5065);Sfur006772(wat);Sfur006951(CG5065);Sfur006953(CG8306);Sfur007701(Jafrac1);Sfur007726(CG5065);Sfur008342(wat);Sfur008351(wat);Sfur008657(Amacr);Sfur008678(CRAT);Sfur009039(PMVK);Sfur009043(CG5065);Sfur009466(Amacr);S…	K11517+K13356+K13335+K13356+K13356+K13239+K00869+K04565+K00106+K13356+K13356+K13356+K13356+K13356+K13279+K13356+K13356+K13356+K01796+K00624+K13273+K13356+K01796+K03781+K13356+K05676+K13356+K01640+K00031+K01897+K00106+K00106
Cellular Processes	Transport and catabolism	Lysosome	47	182	0.00713946	0.0911655	ko04142	Sfur000028(GD10667);Sfur000110(Ppt2);Sfur000111(Arsb);Sfur000424(CG17119);Sfur000881(Lip1);Sfur001004(atp6v0a1);Sfur001487(NAGA);Sfur001590(Lip1);Sfur001643(NAGA);Sfur001670(fdl);Sfur002072(Ppt1);Sfur002836(Sumf1);Sfur003756(slc17a8);Sfur003819(Cd63);Sfur003906(Lip1);Sfur003909(--);Sfur004150(Ptchd3);Sfur004459(SGSH);Sfur005197(Hgsnat);Sfur005885(cfaD);Sfur006300(Lip1);Sfur006408(NT1);Sfur007067(…	K01444+K01074+K01135+K12386+K01052+K02154+K01204+K01052+K01189+K12373+K01074+K13444+K12301+K06497+K01052+K01052+K12385+K01565+K10532+K01365+K01052+K01052+K01363+K01135+K01135+K01135+K03661+K19363+K01206+K01205+K01052+K01052+K12311+K12350+K02146+K21398+K12309+K01365+K01365+K01365+K06497+K12316+K12316+K12316+K12316+K12398+K01052
Metabolism	Carbohydrate metabolism	Glycolysis / Gluconeogenesis	22	72	0.008144	0.100141	ko00010	Sfur000483(PKLR);Sfur000490(--);Sfur000898(T05H10.6);Sfur001986(AKR1B8);Sfur002041(Pgi);Sfur002233(HK1);Sfur005279(YMR099C);Sfur005488(PGK1);Sfur006735(pgk-1);Sfur007076(pdhb-1);Sfur008187(GAPDH);Sfur008511(PyK);Sfur008676(Mipp1);Sfur013135(Aldh2);Sfur013438(Pfk);Sfur014064(PGM2);Sfur015029(Ald1);Sfur015261(aldo-2);MSTRG.13192(mro);MSTRG.25617(Hex-t2);MSTRG.3014(Hex-t2);MSTRG.5712(aldA)	K00873+K03103+K00161+K00002+K01810+K00844+K01792+K00927+K00927+K00162+K00134+K00873+K03103+K00128+K00850+K15779+K01623+K01623+K01785+K00844+K00844+K00128
Metabolism	Metabolism of terpenoids and polyketides	Terpenoid backbone biosynthesis	14	40	0.00916209	0.108636	ko00900	Sfur000207(HMGCS1);Sfur003142(MVK);Sfur003876(--);Sfur004410(FDPS);Sfur005193(Mvd);Sfur005780(HMGCR);Sfur007189(PCYOX1);Sfur009039(PMVK);Sfur013053(Dhrs11);Sfur013403(DHRS11);Sfur015211(Zmpste24);MSTRG.11376(Pdss2);MSTRG.22713(SAR2567);MSTRG.2449(PDSS2)	K01641+K00869+K12505+K00787+K01597+K00021+K05906+K13273+K15890+K15890+K06013+K12505+K15890+K12505
Organismal Systems	Digestive system	Protein digestion and absorption	33	121	0.00966786	0.11068	ko04974	Sfur000630(--);Sfur001806(Slc16a10);Sfur002888(Slc8a1);Sfur003547(nas-13);Sfur003704(--);Sfur003875(--);Sfur005392(--);Sfur005554(Cpb2);Sfur006111(--);Sfur006971(Agrn);Sfur008572(path);Sfur008892(--);Sfur009405(DPP4);Sfur009434(DERP3);Sfur009910(PRSS1);Sfur010066(path);Sfur010342(path);Sfur010786(CG1139);Sfur011902(Slc8a1);Sfur012186(thetaTry);Sfur012500(CPA1);Sfur013016(SLC7A8);Sfur013121(ARB_03…	K06237+K08187+K05849+K08606+K19721+K19720+K19720+K01298+K06237+K06238+K14209+K19720+K01278+K01312+K01312+K14209+K14209+K14209+K05849+K01312+K01298+K13781+K01298+K19720+K13781+K08187+K19720+K06237+K19720+K14209+K14209+K14209+K06237
Metabolism	Lipid metabolism	Glycerophospholipid metabolism	22	74	0.0114638	0.126866	ko00564	Sfur000526(--);Sfur000649(Gpdh);Sfur000808(PLD3);Sfur003362(--);Sfur004571(--);Sfur004713(PLB1);Sfur004887(ETNPPL);Sfur005053(Taz);Sfur005329(PLB1);Sfur005568(PLB1);Sfur006218(CHKB);Sfur008914(GPD2);Sfur011683(MFSD10);Sfur012970(GPAM);Sfur013672(LCLAT1);Sfur014127(Lpin1);Sfur014595(sws);Sfur014886(sws);Sfur015387(sws);MSTRG.13341(eas);MSTRG.13342(eas);MSTRG.17006(PLPP1)	K01047+K00006+K16860+K01047+K01080+K14621+K14286+K13511+K14621+K14621+K14156+K00111+K13506+K00629+K13513+K15728+K14676+K14676+K14676+K00894+K00894+K01080
Metabolism	Lipid metabolism	Linoleic acid metabolism	5	9	0.0135686	0.145315	ko00591	Sfur000526(--);Sfur003362(--);Sfur004713(PLB1);Sfur005329(PLB1);Sfur005568(PLB1)	K01047+K01047+K14621+K14621+K14621
Metabolism	Metabolism of cofactors and vitamins	Pantothenate and CoA biosynthesis	7	16	0.0169273	0.175621	ko00770	Sfur001063(Ppcs);Sfur001899(CSAD);Sfur007449(DPYS);Sfur011355(gadl1);MSTRG.24153(PANK1);MSTRG.24156(PANK1);MSTRG.24157(PANK1)	K01922+K18966+K01464+K18966+K09680+K09680+K09680
Organismal Systems	Aging	Longevity regulating pathway - worm	30	113	0.0192389	0.193555	ko04212	Sfur000067(Parp);Sfur000330(D11DS);Sfur001025(wat);Sfur001994(--);Sfur002862(Far1);Sfur004996(to);Sfur005262(foxo);Sfur006389(wat);Sfur006427(InR);Sfur006756(CG5065);Sfur006772(wat);Sfur006841(PTGES);Sfur006951(CG5065);Sfur006953(CG8306);Sfur007726(CG5065);Sfur008342(wat);Sfur008351(wat);Sfur009043(CG5065);Sfur009994(cat);Sfur010174(CG5065);Sfur011197(--);Sfur012080(daf-36);Sfur012257(wat);Sfur01…	K24070+K00507+K13356+K13356+K13356+K17794+K09408+K13356+K04527+K13356+K13356+K00799+K13356+K13356+K13356+K13356+K13356+K13356+K03781+K13356+K12824+K14938+K13356+K00507+K00507+K00507+K00507+K00507+K00799+K13113
Metabolism	Glycan biosynthesis and metabolism	Glycosphingolipid biosynthesis - globo and isoglobo series	6	13	0.0200737	0.196014	ko00603	Sfur000597(A4galt);Sfur001030(Pdxdc1);Sfur001487(NAGA);Sfur001643(NAGA);Sfur001670(fdl);Sfur008590(Rbm45)	K01988+K01988+K01204+K01189+K12373+K00722
Metabolism	Biosynthesis of other secondary metabolites	Neomycin, kanamycin and gentamicin biosynthesis	3	4	0.0213352	0.20238	ko00524	Sfur002233(HK1);MSTRG.25617(Hex-t2);MSTRG.3014(Hex-t2)	K00844+K00844+K00844
Human Diseases	Cancers	Central carbon metabolism in cancer	17	58	0.0280226	0.258431	ko05230	Sfur000483(PKLR);Sfur000898(T05H10.6);Sfur001786(btl);Sfur002233(HK1);Sfur003765(--);Sfur006284(fend);Sfur006413(fend);Sfur007076(pdhb-1);Sfur008260(Slc7a5);Sfur008511(PyK);Sfur010434(fgt-1);Sfur012113(btl);Sfur013438(Pfk);MSTRG.14814(SLC2A3);MSTRG.14815(SLC2A3);MSTRG.25617(Hex-t2);MSTRG.3014(Hex-t2)	K00873+K00161+K05093+K00844+K07299+K05126+K05126+K00162+K13780+K00873+K07299+K05093+K00850+K07299+K07299+K00844+K00844
Metabolism	Xenobiotics biodegradation and metabolism	Drug metabolism - other enzymes	21	76	0.0300214	0.269381	ko00983	Sfur001309(Est-5C);Sfur001698(--);Sfur002601(RnrS);Sfur003192(Ugt2b1);Sfur003369(Ugt2b1);Sfur004407(XDH);Sfur005404(Rrm1);Sfur006841(PTGES);Sfur007230(TK2);Sfur007449(DPYS);Sfur009957(Upp1);Sfur010320(Ugt1a2);Sfur010670(awd);Sfur011317(Ugt1a8);Sfur011404(UGT2B10);Sfur012994(ry);Sfur013874(XDH);Sfur014200(DUT);Sfur014216(GST1);MSTRG.36688(UPP2);MSTRG.7920(UGT2B18)	K01044+K00699+K10808+K00699+K00699+K00106+K10807+K00799+K00857+K01464+K00757+K00699+K00940+K00699+K00699+K00106+K00106+K01520+K00799+K00757+K00699
Metabolism	Carbohydrate metabolism	Pentose and glucuronate interconversions	14	46	0.0322752	0.280742	ko00040	Sfur000821(DCXR);Sfur000852(DCXR);Sfur001205(AKR1B1);Sfur001698(--);Sfur001986(AKR1B8);Sfur003192(Ugt2b1);Sfur003369(Ugt2b1);Sfur010320(Ugt1a2);Sfur011317(Ugt1a8);Sfur011404(UGT2B10);Sfur012384(Sord);Sfur014743(UGP2);Sfur015411(Ugp2);MSTRG.7920(UGT2B18)	K03331+K03331+K00011+K00699+K00002+K00699+K00699+K00699+K00699+K00699+K00008+K00963+K00963+K00699
Metabolism	Carbohydrate metabolism	Pentose phosphate pathway	12	38	0.0347598	0.280742	ko00030	Sfur002041(Pgi);Sfur006937(LMJF_27_0420);Sfur007062(Gld);Sfur007447(Gld);Sfur012802(rgn);Sfur013438(Pfk);Sfur014064(PGM2);Sfur015029(Ald1);Sfur015203(rgn);Sfur015261(aldo-2);MSTRG.38392(Gld);MSTRG.38393(Gld)	K01810+K00852+K00115+K00115+K01053+K00850+K15779+K01623+K01053+K01623+K00115+K00115
Metabolism	Lipid metabolism	Steroid hormone biosynthesis	11	34	0.0357063	0.280742	ko00140	Sfur001698(--);Sfur002082(LST);Sfur002746(Hsd17b12);Sfur003192(Ugt2b1);Sfur003369(Ugt2b1);Sfur005907(LST);Sfur007538(hsd17b12);Sfur010320(Ugt1a2);Sfur011317(Ugt1a8);Sfur011404(UGT2B10);MSTRG.7920(UGT2B18)	K00699+K01016+K10251+K00699+K00699+K01016+K10251+K00699+K00699+K00699+K00699
Organismal Systems	Sensory system	Phototransduction	5	11	0.0360411	0.280742	ko04744	Sfur001961(--);Sfur005723(TpnC41C);Sfur009374(CNGB1);Sfur012073(CALML4);Sfur013596(TpnC41C)	K04952+K02183+K04952+K02183+K02183
Metabolism	Glycan biosynthesis and metabolism	Glycosaminoglycan degradation	10	30	0.0363013	0.280742	ko00531	Sfur000111(Arsb);Sfur001670(fdl);Sfur004459(SGSH);Sfur005197(Hgsnat);Sfur008374(ARSJ);Sfur009020(Arsb);Sfur009114(ARSI);Sfur010398(NAGLU);Sfur012780(HPSE);Sfur014540(GLB1)	K01135+K12373+K01565+K10532+K01135+K01135+K01135+K01205+K07964+K12309
Metabolism	Lipid metabolism	Ether lipid metabolism	9	26	0.0363612	0.280742	ko00565	Sfur000526(--);Sfur000808(PLD3);Sfur001547(TMEM86A);Sfur003362(--);Sfur004571(--);Sfur004713(PLB1);Sfur005329(PLB1);Sfur005568(PLB1);MSTRG.17006(PLPP1)	K01047+K16860+K18575+K01047+K01080+K14621+K14621+K14621+K01080
Genetic Information Processing	Transcription	Spliceosome	38	157	0.0386216	0.291418	ko03040	Sfur000012(SNRPG);Sfur000238(CHERP);Sfur000443(SmD2);Sfur000672(SRSF2);Sfur001046(SRSF2);Sfur001144(Hrb87F);Sfur001438(SF3A2);Sfur001536(Thoc2);Sfur002293(HNRNPM);Sfur002386(PPIE);Sfur002834(PPIH);Sfur003162(prpf31);Sfur003971(l(3)72Ab);Sfur004656(Ppia);Sfur005496(HNRNPK);Sfur005516(LSM6);Sfur006845(Cbp80);Sfur008099(fand);Sfur008171(SmB);Sfur008520(Rsf1);Sfur010097(snf);Sfur010216(Ppil1);Sfur010…	K11099+K12841+K11096+K12891+K12891+K12741+K12826+K12879+K12887+K09564+K09567+K12844+K12854+K09564+K12886+K12625+K12882+K12867+K11086+K12741+K11094+K12733+K11087+K12624+K12741+K12874+K12824+K12857+K12833+K12622+K12896+K12893+K12823+K12621+K03283+K12854+K03283+K03283
Metabolism	Biosynthesis of other secondary metabolites	Caffeine metabolism	4	8	0.0424105	0.310271	ko00232	Sfur004407(XDH);Sfur009447(Uro);Sfur012994(ry);Sfur013874(XDH)	K00106+K00365+K00106+K00106
Metabolism	Amino acid metabolism	Arginine and proline metabolism	15	52	0.0429894	0.310271	ko00330	Sfur000870(hoga1);Sfur002024(SAT2);Sfur005064(anon-37Cs);Sfur005641(LAP3);Sfur006110(lap3);Sfur008774(LAP3);Sfur009105(LAP3);Sfur009780(Smox);Sfur010190(CNDP2);Sfur011283(Aldh18a1);Sfur012644(lap3);Sfur013135(Aldh2);Sfur014260(lap3);Sfur014763(lap3);MSTRG.5712(aldA)	K18123+K00657+K12259+K11142+K11142+K11142+K11142+K12259+K08660+K12657+K11142+K00128+K11142+K11142+K00128
Metabolism	Amino acid metabolism	Glycine, serine and threonine metabolism	10	31	0.0450648	0.31833	ko00260	Sfur000372(CTH);Sfur002093(AGXT2);Sfur004874(PSPH);Sfur007136(Gld);Sfur007376(tdcB);Sfur007481(Gld);Sfur007844(Gld);Sfur011342(Gld);MSTRG.24865(Gld);MSTRG.25015(Gld)	K01758+K00827+K01079+K00108+K01754+K00108+K00108+K00108+K00108+K00108
Human Diseases	Immune diseases	Primary immunodeficiency	3	5	0.0460825	0.318738	ko05340	Sfur005695(DCLRE1C);Sfur012496(Ung);MSTRG.14605(--)	K10887+K03648+K01488
Environmental Information Processing	Signal transduction	HIF-1 signaling pathway	20	76	0.0538964	0.365175	ko04066	Sfur000898(T05H10.6);Sfur001378(--);Sfur001629(--);Sfur002233(HK1);Sfur003765(--);Sfur005488(PGK1);Sfur006427(InR);Sfur006735(pgk-1);Sfur007076(pdhb-1);Sfur007922(TEK);Sfur008187(GAPDH);Sfur010434(fgt-1);Sfur012647(Pfkfb1);Sfur013438(Pfk);Sfur015029(Ald1);Sfur015261(aldo-2);MSTRG.14814(SLC2A3);MSTRG.14815(SLC2A3);MSTRG.25617(Hex-t2);MSTRG.3014(Hex-t2)	K00161+K05459+K04526+K00844+K07299+K00927+K04527+K00927+K00162+K05121+K00134+K07299+K01103+K00850+K01623+K01623+K07299+K07299+K00844+K00844
Metabolism	Glycan biosynthesis and metabolism	N-Glycan biosynthesis	14	50	0.0620053	0.411715	ko00510	Sfur000343(Alg9);Sfur002886(DPAGT1);Sfur003783(CG10166);Sfur004835(CG8399);Sfur005031(Dad1);Sfur007830(CG10166);Sfur007924(RPN1);Sfur009790(Ganab);Sfur010876(Man1b1);Sfur011285(Stt3b);Sfur011854(Mogs);Sfur013406(RPN2);Sfur014350(RPN1);MSTRG.14666(Stt3a)	K03846+K01001+K00721+K03843+K12668+K00721+K12666+K05546+K23741+K07151+K01228+K12667+K12666+K07151
Metabolism	Lipid metabolism	alpha-Linolenic acid metabolism	5	13	0.0730426	0.462649	ko00592	Sfur000526(--);Sfur003362(--);Sfur004713(PLB1);Sfur005329(PLB1);Sfur005568(PLB1)	K01047+K01047+K14621+K14621+K14621
Genetic Information Processing	Replication and repair	Non-homologous end-joining	5	13	0.0730426	0.462649	ko03450	Sfur005695(DCLRE1C);Sfur012510(Mre11);Sfur013892(rad50);MSTRG.27247(Fen1);MSTRG.4153(RAD50)	K10887+K10865+K10866+K04799+K10866
Metabolism	Lipid metabolism	Steroid biosynthesis	11	38	0.0748892	0.462649	ko00100	Sfur000881(Lip1);Sfur001590(Lip1);Sfur002482(--);Sfur003906(Lip1);Sfur003909(--);Sfur006300(Lip1);Sfur006408(NT1);Sfur010427(Lip3);Sfur010830(Lip3);Sfur014861(DWF5);MSTRG.35966(Lip1)	K01052+K01052+K00637+K01052+K01052+K01052+K01052+K01052+K01052+K00213+K01052
Human Diseases	Substance dependence	Amphetamine addiction	17	65	0.0752501	0.462649	ko05031	Sfur000422(SLC18B1);Sfur003099(grin2b);Sfur003132(DAT);Sfur003329(--);Sfur003666(unc-64);Sfur004029(ppp1cc-a);Sfur004157(ppp1cc-a);Sfur005723(TpnC41C);Sfur008504(Pka-C1);Sfur009057(AAEL010734);Sfur010310(ple);Sfur012073(CALML4);Sfur012397(CAMK4);Sfur013596(TpnC41C);Sfur014303(SLC18A2);MSTRG.37219(Creb3l4);MSTRG.37220(Creb3l4)	K08155+K05210+K05036+K04560+K04560+K06269+K06269+K02183+K04345+K01593+K00501+K02183+K05869+K02183+K08155+K09048+K09048
Metabolism	Carbohydrate metabolism	Ascorbate and aldarate metabolism	13	48	0.0882653	0.532801	ko00053	Sfur001698(--);Sfur003192(Ugt2b1);Sfur003201(LCC5);Sfur003369(Ugt2b1);Sfur010320(Ugt1a2);Sfur011317(Ugt1a8);Sfur011404(UGT2B10);Sfur012802(rgn);Sfur013135(Aldh2);Sfur013637(miox);Sfur015203(rgn);MSTRG.5712(aldA);MSTRG.7920(UGT2B18)	K00699+K00699+K00423+K00699+K00699+K00699+K00699+K01053+K00128+K00469+K01053+K00128+K00699
Metabolism	Lipid metabolism	Synthesis and degradation of ketone bodies	4	10	0.0937498	0.546417	ko00072	Sfur000207(HMGCS1);Sfur005958(--);Sfur006093(HSD11B2);Sfur012504(HMGCL)	K01641+K00019+K00019+K01640
Metabolism	Metabolism of other amino acids	beta-Alanine metabolism	10	35	0.0938125	0.546417	ko00410	Sfur001899(CSAD);Sfur005064(anon-37Cs);Sfur007449(DPYS);Sfur009780(Smox);Sfur009796(cpnA);Sfur010190(CNDP2);Sfur011355(gadl1);Sfur013135(Aldh2);MSTRG.29894(ECHS1);MSTRG.5712(aldA)	K18966+K12259+K01464+K12259+K14729+K08660+K18966+K00128+K07511+K00128
Organismal Systems	Endocrine system	Adipocytokine signaling pathway	11	40	0.101918	0.575236	ko04920	Sfur003765(--);Sfur005716(PAQR3);Sfur007641(--);Sfur007741(CAMKK1);Sfur008253(Ptpn11);Sfur008731(RXR);Sfur010046(CPT1B);Sfur010434(fgt-1);Sfur012982(Acsl1);MSTRG.14814(SLC2A3);MSTRG.14815(SLC2A3)	K07299+K07297+K07359+K07359+K07293+K08524+K08765+K07299+K01897+K07299+K07299
Cellular Processes	Transport and catabolism	Phagosome	31	135	0.102226	0.575236	ko04145	Sfur000269(alphaTub84B);Sfur000419(Calr);Sfur000616(TUBB4B);Sfur001001(SCARB1);Sfur001004(atp6v0a1);Sfur001869(Act5C);Sfur002272(alphaTub84B);Sfur002673(TUBB4B);Sfur002696(alphaTub84B);Sfur003100(pes);Sfur003517(--);Sfur005046(betaTub60D);Sfur005842(pes);Sfur005885(cfaD);Sfur005994(SEC61G);Sfur006380(SEC61A2);Sfur007895(SCARB2);Sfur008961(SEC61B);Sfur009516(ATP6V0B);Sfur010962(--);Sfur011784(TUBA…	K07374+K08057+K07375+K13885+K02154+K05692+K07374+K07375+K07374+K13885+K13885+K07375+K13885+K01365+K07342+K10956+K13885+K09481+K03661+K00914+K07374+K07374+K10413+K02146+K00914+K00914+K01365+K01365+K01365+K07374+K13885
Cellular Processes	Cell growth and death	Apoptosis	21	87	0.106275	0.588053	ko04210	Sfur000067(Parp);Sfur000269(alphaTub84B);Sfur001869(Act5C);Sfur002272(alphaTub84B);Sfur002696(alphaTub84B);Sfur004553(Drice);Sfur004581(--);Sfur005342(--);Sfur005769(Lam);Sfur005885(cfaD);Sfur007067(TINAGL1);Sfur009752(BIRC6);Sfur009965(Itpr);Sfur011784(TUBA8);Sfur011930(tba-2);Sfur014606(--);Sfur014756(Cp1);Sfur014816(Cp1);Sfur014836(Cp1);MSTRG.24261(TUBA4A);MSTRG.38817(Itpr)	K24070+K07374+K05692+K07374+K07374+K04397+K04402+K04402+K07611+K01365+K01363+K08731+K04958+K07374+K07374+K02308+K01365+K01365+K01365+K07374+K04958
Metabolism	Xenobiotics biodegradation and metabolism	Drug metabolism - cytochrome P450	10	36	0.109549	0.596236	ko00982	Sfur001698(--);Sfur003192(Ugt2b1);Sfur003369(Ugt2b1);Sfur005336(GstS1);Sfur006841(PTGES);Sfur010320(Ugt1a2);Sfur011317(Ugt1a8);Sfur011404(UGT2B10);Sfur014216(GST1);MSTRG.7920(UGT2B18)	K00699+K00699+K00699+K04097+K00799+K00699+K00699+K00699+K00799+K00699
Human Diseases	Infectious diseases	Pathogenic Escherichia coli infection	28	122	0.116397	0.618307	ko05130	Sfur000269(alphaTub84B);Sfur000616(TUBB4B);Sfur000804(--);Sfur000970(zip);Sfur001869(Act5C);Sfur002272(alphaTub84B);Sfur002555(arpc1a-b);Sfur002673(TUBB4B);Sfur002696(alphaTub84B);Sfur003304(Myo61F);Sfur004463(Pdzd2);Sfur004553(Drice);Sfur004862(brk1-b);Sfur004863(SEC24C);Sfur005046(betaTub60D);Sfur005401(myo19);Sfur007457(arpc4);Sfur008187(GAPDH);Sfur008253(Ptpn11);Sfur008871(arpc5-b);Sfur011206…	K07374+K07375+K10352+K10352+K05692+K07374+K05757+K07375+K07374+K10356+K10356+K04397+K05752+K14007+K07375+K10357+K05755+K00134+K07293+K05754+K12800+K20352+K07374+K07374+K03175+K23612+K10352+K07374
Organismal Systems	Sensory system	Olfactory transduction	11	41	0.117329	0.618307	ko04740	Sfur001961(--);Sfur002888(Slc8a1);Sfur005723(TpnC41C);Sfur008504(Pka-C1);Sfur008966(SLC24A3);Sfur009374(CNGB1);Sfur009822(--);Sfur011902(Slc8a1);Sfur012073(CALML4);Sfur013596(TpnC41C);MSTRG.4305(--)	K04952+K05849+K02183+K04345+K13752+K04952+K19477+K05849+K02183+K02183+K07376
Metabolism	Lipid metabolism	Arachidonic acid metabolism	8	28	0.126524	0.637471	ko00590	Sfur000526(--);Sfur003362(--);Sfur004713(PLB1);Sfur005108(LTA4H);Sfur005329(PLB1);Sfur005336(GstS1);Sfur005568(PLB1);Sfur005578(Gpx6)	K01047+K01047+K14621+K01254+K14621+K04097+K14621+K00432
Metabolism	Glycan biosynthesis and metabolism	Mucin type O-glycan biosynthesis	4	11	0.126726	0.637471	ko00512	Sfur001931(Pgant7);Sfur002923(Pgant2);Sfur009143(Pgant35A);Sfur012958(Pgant3)	K00710+K00710+K00710+K00710
Metabolism	Metabolism of cofactors and vitamins	One carbon pool by folate	4	11	0.126726	0.637471	ko00670	Sfur000471(ATIC);Sfur011131(pug);Sfur012668(MTHFD2);MSTRG.13338(Tyms)	K00602+K00288+K13403+K00560
Metabolism	Amino acid metabolism	Tyrosine metabolism	9	33	0.136925	0.678493	ko00350	Sfur000602(y);Sfur000923(y);Sfur004822(tdc-1);Sfur007050(y);Sfur007942(Fah);Sfur009057(AAEL010734);Sfur010310(ple);Sfur013161(hgo);Sfur014316(CG5235)	K22203+K22203+K22329+K22203+K01555+K01593+K00501+K00451+K00503
Metabolism	Xenobiotics biodegradation and metabolism	Metabolism of xenobiotics by cytochrome P450	10	38	0.145189	0.690093	ko00980	Sfur001698(--);Sfur003192(Ugt2b1);Sfur003369(Ugt2b1);Sfur005336(GstS1);Sfur006841(PTGES);Sfur010320(Ugt1a2);Sfur011317(Ugt1a8);Sfur011404(UGT2B10);Sfur014216(GST1);MSTRG.7920(UGT2B18)	K00699+K00699+K00699+K04097+K00799+K00699+K00699+K00699+K00799+K00699
Metabolism	Lipid metabolism	Fatty acid biosynthesis	6	20	0.145502	0.690093	ko00061	Sfur002528(Fasn);Sfur007463(FASN);Sfur007714(ACAC);Sfur012428(IQCA1);Sfur012982(Acsl1);MSTRG.13724(Fcp3C)	K00665+K00665+K11262+K00665+K01897+K22540
Human Diseases	Cancers	Thyroid cancer	6	20	0.145502	0.690093	ko05216	Sfur002933(Mtor);Sfur004581(--);Sfur005342(--);Sfur006284(fend);Sfur006413(fend);Sfur008731(RXR)	K09291+K04402+K04402+K05126+K05126+K08524
Metabolism	Metabolism of cofactors and vitamins	Nicotinate and nicotinamide metabolism	8	29	0.148134	0.692683	ko00760	Sfur000262(Nnt);Sfur000347(NNT);Sfur002569(PNP);Sfur003745(NSNH);Sfur007112(lmo0130);Sfur011998(NT5C2);Sfur013292(nt5dc3);Sfur013362(Nadk)	K00323+K00323+K03783+K01239+K01081+K01081+K01081+K00858
Human Diseases	Infectious diseases	Staphylococcus aureus infection	2	4	0.156212	0.720313	ko05150	Sfur004533(--);Sfur007520(--)	K06496+K06496
Environmental Information Processing	Signal transduction	AMPK signaling pathway	23	102	0.165315	0.751841	ko04152	Sfur000330(D11DS);Sfur001378(--);Sfur001629(--);Sfur002528(Fasn);Sfur005262(foxo);Sfur005716(PAQR3);Sfur005780(HMGCR);Sfur006427(InR);Sfur007463(FASN);Sfur007641(--);Sfur007714(ACAC);Sfur007741(CAMKK1);Sfur010046(CPT1B);Sfur012424(D11DS);Sfur012428(IQCA1);Sfur012647(Pfkfb1);Sfur013200(Scd4);Sfur013234(Scd1);Sfur013434(D11DS);Sfur013438(Pfk);Sfur013479(SCD5);MSTRG.37219(Creb3l4);MSTRG.37220(Creb3l…	K00507+K05459+K04526+K00665+K09408+K07297+K00021+K04527+K00665+K07359+K11262+K07359+K08765+K00507+K00665+K01103+K00507+K00507+K00507+K00850+K00507+K09048+K09048
Organismal Systems	Endocrine system	Ovarian Steroidogenesis	11	44	0.170828	0.755949	ko04913	Sfur001001(SCARB1);Sfur001378(--);Sfur001629(--);Sfur003100(pes);Sfur003517(--);Sfur005842(pes);Sfur006427(InR);Sfur007895(SCARB2);Sfur008504(Pka-C1);MSTRG.23839(ADCY9);MSTRG.8996(--)	K13885+K05459+K04526+K13885+K13885+K13885+K04527+K13885+K04345+K08049+K13885
Genetic Information Processing	Transcription	RNA polymerase	8	30	0.1714	0.755949	ko03020	Sfur000753(POLR3F);Sfur001288(Rpb4);Sfur003278(Rpb11);Sfur004491(POLR2E);Sfur005895(RpII18);Sfur013842(RpII140);Sfur014685(POLR2G);Sfur015340(POLR3K)	K03025+K03012+K03008+K03013+K03014+K03010+K03015+K03019
Cellular Processes	Cellular community - eukaryotes	Gap junction	20	88	0.176253	0.755949	ko04540	Sfur000269(alphaTub84B);Sfur000616(TUBB4B);Sfur001358(Gycalpha99B);Sfur002202(Src64B);Sfur002272(alphaTub84B);Sfur002673(TUBB4B);Sfur002696(alphaTub84B);Sfur002767(Src64B);Sfur005046(betaTub60D);Sfur006377(Dlish);Sfur007675(Gpr161);Sfur008504(Pka-C1);Sfur009822(--);Sfur009965(Itpr);Sfur011784(TUBA8);Sfur011930(tba-2);MSTRG.23839(ADCY9);MSTRG.24261(TUBA4A);MSTRG.38817(Itpr);MSTRG.4305(--)	K07374+K07375+K12318+K05704+K07374+K07375+K07374+K05704+K07375+K04364+K04145+K04345+K19477+K04958+K07374+K07374+K08049+K07374+K04958+K07376
Human Diseases	Substance dependence	Alcoholism	21	93	0.176996	0.755949	ko05034	Sfur000422(SLC18B1);Sfur001362(--);Sfur003099(grin2b);Sfur003132(DAT);Sfur004029(ppp1cc-a);Sfur004157(ppp1cc-a);Sfur005278(H2AZ2);Sfur005723(TpnC41C);Sfur006377(Dlish);Sfur007641(--);Sfur007675(Gpr161);Sfur007741(CAMKK1);Sfur008504(Pka-C1);Sfur009057(AAEL010734);Sfur010310(ple);Sfur012073(CALML4);Sfur012397(CAMK4);Sfur013596(TpnC41C);Sfur014303(SLC18A2);MSTRG.37219(Creb3l4);MSTRG.37220(Creb3l4)	K08155+K17447+K05210+K05036+K06269+K06269+K11251+K02183+K04364+K07359+K04145+K07359+K04345+K01593+K00501+K02183+K05869+K02183+K08155+K09048+K09048
Cellular Processes	Cell growth and death	Cell cycle	26	118	0.17815	0.755949	ko04110	Sfur000038(BUB1);Sfur000071(Mcm7);Sfur000145(Mcm7);Sfur001474(Anapc4);Sfur002315(dpa);Sfur003374(--);Sfur004581(--);Sfur004627(Stag1);Sfur005342(--);Sfur005415(CycE);Sfur005880(PCNA);Sfur006020(ANAPC1);Sfur008514(Orc1);Sfur008940(ORC5);Sfur009036(plk1);Sfur009486(CDC6);Sfur010875(Cdc14a);Sfur011153(BUB3);Sfur011647(Mcm5);Sfur012148(plk1);Sfur013773(Mcm3);Sfur015063(Mcm2);Sfur015375(Orc3);MSTRG.36…	K02178+K02210+K02210+K03351+K02212+K02365+K04402+K06671+K04402+K06626+K04802+K03348+K02603+K02607+K06631+K02213+K06639+K02180+K02209+K06631+K02541+K02540+K02605+K06636+K02542+K02542
Genetic Information Processing	Translation	Aminoacyl-tRNA biosynthesis	14	59	0.182156	0.755949	ko00970	Sfur001417(Lars1);Sfur001513(NARS2);Sfur006058(WARS2);Sfur006531(YARS1);Sfur008113(vars1);Sfur008237(AlaRS);Sfur008457(AlaRS);Sfur009031(hars);Sfur009119(Sars1);Sfur013112(GlnRS);Sfur014586(AlaRS-m);Sfur015226(CPIJ001717);MSTRG.23598(VARS1);MSTRG.2618(vars1)	K01869+K01893+K01867+K01866+K01873+K01872+K01872+K01892+K01875+K01886+K01872+K02434+K01873+K01873
Organismal Systems	Endocrine system	Thyroid hormone synthesis	14	59	0.182156	0.755949	ko04918	Sfur000302(Hsp90b1);Sfur000392(Hsp90b1);Sfur002002(--);Sfur002672(Lrp2);Sfur005578(Gpx6);Sfur008504(Pka-C1);Sfur008764(Iyd);Sfur009965(Itpr);MSTRG.23839(ADCY9);MSTRG.34003(Hsc70-3);MSTRG.34004(Hsc70-3);MSTRG.37219(Creb3l4);MSTRG.37220(Creb3l4);MSTRG.38817(Itpr)	K09487+K09487+K06233+K06233+K00432+K04345+K17231+K04958+K08049+K09490+K09490+K09048+K09048+K04958
Human Diseases	Substance dependence	Cocaine addiction	10	40	0.186012	0.760563	ko05030	Sfur000422(SLC18B1);Sfur003099(grin2b);Sfur003132(DAT);Sfur007675(Gpr161);Sfur008504(Pka-C1);Sfur009057(AAEL010734);Sfur010310(ple);Sfur014303(SLC18A2);MSTRG.37219(Creb3l4);MSTRG.37220(Creb3l4)	K08155+K05210+K05036+K04145+K04345+K01593+K00501+K08155+K09048+K09048
Metabolism	Global and overview maps	Biosynthesis of amino acids	17	74	0.18785	0.760563	ko01230	Sfur000372(CTH);Sfur000483(PKLR);Sfur002180(GPT);Sfur002616(gpt2l);Sfur004874(PSPH);Sfur005488(PGK1);Sfur006735(pgk-1);Sfur007376(tdcB);Sfur008187(GAPDH);Sfur008511(PyK);Sfur011283(Aldh18a1);Sfur011418(Aco1);Sfur012700(Idh1);Sfur013438(Pfk);Sfur013726(IDH1);Sfur015029(Ald1);Sfur015261(aldo-2)	K01758+K00873+K00814+K00814+K01079+K00927+K00927+K01754+K00134+K00873+K12657+K01681+K00031+K00850+K00030+K01623+K01623
Genetic Information Processing	Replication and repair	Homologous recombination	9	36	0.203052	0.805868	ko03440	Sfur000871(Top3a);Sfur001479(Top3beta);Sfur001674(mtSSB);Sfur005462(RpA-70);Sfur008184(DNApol-delta);Sfur009691(DNApol-delta);Sfur012510(Mre11);Sfur013892(rad50);MSTRG.4153(RAD50)	K03165+K03165+K03111+K07466+K02327+K02327+K10865+K10866+K10866
Human Diseases	Infectious diseases	Amoebiasis	17	75	0.203894	0.805868	ko05146	Sfur000630(--);Sfur003875(--);Sfur005392(--);Sfur006111(--);Sfur007115(LanB1);Sfur007701(Jafrac1);Sfur008504(Pka-C1);Sfur008892(--);Sfur010462(LanB2);Sfur013478(--);Sfur013897(Serpini1);Sfur014604(SERPINB1);Sfur014872(--);Sfur014933(CG3430);Sfur015140(--);Sfur015366(--);MSTRG.33770(--)	K06237+K19720+K19720+K06237+K05636+K13279+K04345+K19720+K05635+K19720+K13963+K13963+K19720+K05700+K06237+K19720+K06237
Metabolism	Glycan biosynthesis and metabolism	Glycosphingolipid biosynthesis - ganglio series	3	9	0.219548	0.855056	ko00604	Sfur001670(fdl);Sfur004268(Slc33a1);Sfur014540(GLB1)	K12373+K03372+K12309
Metabolism	Nucleotide metabolism	Purine metabolism	30	142	0.224002	0.855056	ko00230	Sfur000471(ATIC);Sfur000483(PKLR);Sfur001132(urad);Sfur001358(Gycalpha99B);Sfur001743(pde-5);Sfur002569(PNP);Sfur002601(RnrS);Sfur003745(NSNH);Sfur004407(XDH);Sfur004945(AK9);Sfur005404(Rrm1);Sfur007112(lmo0130);Sfur008511(PyK);Sfur009447(Uro);Sfur010067(pde-5);Sfur010316(Pde7b);Sfur010670(awd);Sfur011670(AK7);Sfur011958(Ampd2);Sfur011998(NT5C2);Sfur012994(ry);Sfur013292(nt5dc3);Sfur013874(XDH);S…	K00602+K00873+K13485+K12318+K18438+K03783+K10808+K01239+K00106+K18533+K10807+K01081+K00873+K00365+K18438+K13293+K00940+K00939+K01490+K01081+K00106+K01081+K00106+K15779+K00764+K00939+K01488+K13298+K08049+K01769
Metabolism	Global and overview maps	2-Oxocarboxylic acid metabolism	5	18	0.224066	0.855056	ko01210	Sfur002180(GPT);Sfur002616(gpt2l);Sfur011418(Aco1);Sfur012700(Idh1);Sfur013726(IDH1)	K00814+K00814+K01681+K00031+K00030
Metabolism	Metabolism of cofactors and vitamins	Biotin metabolism	2	5	0.229632	0.86634	ko00780	Sfur011825(vanin-like);Sfur014569(Hlcs)	K01435+K01942
Metabolism	Glycan biosynthesis and metabolism	Glycosphingolipid biosynthesis - lacto and neolacto series	4	14	0.246868	0.920902	ko00601	Sfur000597(A4galt);Sfur001030(Pdxdc1);Sfur007841(B3GALT1);Sfur012867(SERP2)	K01988+K01988+K07819+K07819
Metabolism	Glycan biosynthesis and metabolism	Other types of O-glycan biosynthesis	9	38	0.253172	0.93197	ko00514	Sfur001931(Pgant7);Sfur002923(Pgant2);Sfur008588(Eogt);Sfur009143(Pgant35A);Sfur009196(rt);Sfur009558(POFUT2);Sfur010039(AGAP012208);Sfur012142(tw);Sfur012958(Pgant3)	K00710+K00710+K18134+K00710+K00728+K03691+K11703+K00728+K00710
Human Diseases	Cancers	Chemical carcinogenesis	10	43	0.25545	0.93197	ko05204	Sfur001698(--);Sfur003192(Ugt2b1);Sfur003369(Ugt2b1);Sfur005336(GstS1);Sfur006841(PTGES);Sfur010320(Ugt1a2);Sfur011317(Ugt1a8);Sfur011404(UGT2B10);Sfur014216(GST1);MSTRG.7920(UGT2B18)	K00699+K00699+K00699+K04097+K00799+K00699+K00699+K00699+K00799+K00699
Metabolism	Amino acid metabolism	Histidine metabolism	3	10	0.273462	0.971202	ko00340	Sfur010190(CNDP2);Sfur013135(Aldh2);MSTRG.5712(aldA)	K08660+K00128+K00128
Human Diseases	Infectious diseases	Malaria	3	10	0.273462	0.971202	ko05144	Sfur004533(--);Sfur007288(LRP1);Sfur007520(--)	K06496+K04550+K06496
Metabolism	Lipid metabolism	Sphingolipid metabolism	7	29	0.274979	0.971202	ko00600	Sfur001643(NAGA);Sfur004571(--);Sfur012437(SMPD1);Sfur012811(Cers6);Sfur013298(CDase);Sfur014540(GLB1);MSTRG.17006(PLPP1)	K01189+K01080+K12350+K23727+K12349+K12309+K01080
Organismal Systems	Endocrine system	Prolactin signaling pathway	9	39	0.279627	0.977223	ko04917	Sfur001129(CISH);Sfur001362(--);Sfur001629(--);Sfur002202(Src64B);Sfur002767(Src64B);Sfur005262(foxo);Sfur006377(Dlish);Sfur008761(SOCS5);Sfur010310(ple)	K04701+K17447+K04526+K05704+K05704+K09408+K04364+K04698+K00501
Metabolism	Lipid metabolism	Primary bile acid biosynthesis	2	6	0.304566	1	ko00120	Sfur008657(Amacr);Sfur009466(Amacr)	K01796+K01796
Metabolism	Amino acid metabolism	Tryptophan metabolism	8	35	0.307111	1	ko00380	Sfur001357(AGAP002721);Sfur001384(--);Sfur006106(--);Sfur009057(AAEL010734);Sfur009994(cat);Sfur013135(Aldh2);MSTRG.29894(ECHS1);MSTRG.5712(aldA)	K00453+K00669+K00669+K01593+K03781+K00128+K07511+K00128
Organismal Systems	Digestive system	Pancreatic secretion	24	117	0.307564	1	ko04972	Sfur000193(Pnliprp2);Sfur000526(--);Sfur001890(PNLIP);Sfur002974(PNLIP);Sfur003019(--);Sfur003362(--);Sfur003979(PNLIPRP2);Sfur005554(Cpb2);Sfur006653(IFRD2);Sfur008383(cckar);Sfur009434(DERP3);Sfur009910(PRSS1);Sfur009965(Itpr);Sfur012186(thetaTry);Sfur012500(CPA1);Sfur013121(ARB_03789);Sfur013911(PNLIP);Sfur014230(Pnliprp1);Sfur014232(Pnliprp1);Sfur014832(Lipg);MSTRG.23839(ADCY9);MSTRG.28763(PN…	K14073+K01047+K14075+K14073+K14075+K01047+K14073+K01298+K13855+K04194+K01312+K01312+K04958+K01312+K01298+K01298+K14073+K14073+K14073+K14073+K08049+K14074+K14074+K04958
Human Diseases	Endocrine and metabolic diseases	Insulin resistance	18	86	0.308686	1	ko04931	Sfur001629(--);Sfur003323(Mlxipl);Sfur003765(--);Sfur004029(ppp1cc-a);Sfur004157(ppp1cc-a);Sfur004784(Gfpt2);Sfur006427(InR);Sfur007578(Slc27a4);Sfur008253(Ptpn11);Sfur010046(CPT1B);Sfur010278(hmces);Sfur010434(fgt-1);Sfur014612(Rps6ka2);MSTRG.14814(SLC2A3);MSTRG.14815(SLC2A3);MSTRG.37219(Creb3l4);MSTRG.37220(Creb3l4);MSTRG.976(--)	K04526+K09113+K07299+K06269+K06269+K00820+K04527+K08745+K07293+K08765+K05696+K07299+K04373+K07299+K07299+K09048+K09048+K17902
Metabolism	Metabolism of other amino acids	Taurine and hypotaurine metabolism	3	11	0.328487	1	ko00430	Sfur001899(CSAD);Sfur011355(gadl1);Sfur012202(Ggt7)	K18966+K18966+K00681
Metabolism	Metabolism of cofactors and vitamins	Retinol metabolism	11	51	0.329218	1	ko00830	Sfur001154(RDH13);Sfur001698(--);Sfur003192(Ugt2b1);Sfur003369(Ugt2b1);Sfur003677(RDH14);Sfur003700(Hsd17b11);Sfur004885(HSD17B13);Sfur010320(Ugt1a2);Sfur011317(Ugt1a8);Sfur011404(UGT2B10);MSTRG.7920(UGT2B18)	K11153+K00699+K00699+K00699+K11153+K15734+K15734+K00699+K00699+K00699+K00699
Metabolism	Metabolism of cofactors and vitamins	Porphyrin and chlorophyll metabolism	10	46	0.33197	1	ko00860	Sfur001698(--);Sfur003192(Ugt2b1);Sfur003369(Ugt2b1);Sfur003398(MMAB);Sfur009205(Uros);Sfur010320(Ugt1a2);Sfur011317(Ugt1a8);Sfur011404(UGT2B10);Sfur012301(BLVRB);MSTRG.7920(UGT2B18)	K00699+K00699+K00699+K00798+K01719+K00699+K00699+K00699+K05901+K00699
Metabolism	Amino acid metabolism	Valine, leucine and isoleucine biosynthesis	1	2	0.333639	1	ko00290	Sfur007376(tdcB)	K01754
Organismal Systems	Immune system	Toll and Imd signaling pathway	16	77	0.334693	1	ko04624	Sfur000631(SPE);Sfur000807(SPE);Sfur004720(--);Sfur005596(Ank3);Sfur011505(modSP);Sfur011690(SPE);Sfur011789(--);Sfur011873(kay);Sfur012271(modSP);Sfur013134(GRP);Sfur014773(Toll-6);MSTRG.24092(grass);MSTRG.24415(F10);MSTRG.24416(F10);MSTRG.28015(dl);MSTRG.3657(LRP1B)	K20672+K20672+K20668+K10380+K20674+K20672+K20674+K09031+K20674+K20697+K18809+K20674+K20674+K20674+K09254+K20674
Human Diseases	Cancers	Proteoglycans in cancer	29	145	0.336141	1	ko05205	Sfur000219(FLNA);Sfur001378(--);Sfur001869(Act5C);Sfur001985(fz2);Sfur002202(Src64B);Sfur002767(Src64B);Sfur003731(PXN);Sfur003819(Cd63);Sfur004029(ppp1cc-a);Sfur004157(ppp1cc-a);Sfur004373(Iqgap1);Sfur004876(ptc);Sfur005596(Ank3);Sfur005885(cfaD);Sfur006377(Dlish);Sfur008253(Ptpn11);Sfur008504(Pka-C1);Sfur008550(Hspg2);Sfur009397(--);Sfur009965(Itpr);Sfur012780(HPSE);Sfur014187(fzd10-a);Sfur0147…	K04437+K05459+K05692+K02375+K05704+K05704+K05760+K06497+K06269+K06269+K16848+K06225+K10380+K01365+K04364+K07293+K04345+K06255+K06255+K04958+K07964+K02842+K01365+K01365+K01365+K06497+K04707+K12823+K04958
Organismal Systems	Environmental adaptation	Circadian rhythm - fly	4	16	0.33674	1	ko04711	Sfur002772(Clk);Sfur007763(--);Sfur010509(HLF);Sfur010797(Arntl)	K02223+K12114+K09057+K02296
Organismal Systems	Endocrine system	Estrogen signaling pathway	20	98	0.33846	1	ko04915	Sfur000302(Hsp90b1);Sfur000392(Hsp90b1);Sfur001362(--);Sfur001941(gbb-1);Sfur002202(Src64B);Sfur002376(GABBR2);Sfur002767(Src64B);Sfur005723(TpnC41C);Sfur006377(Dlish);Sfur008504(Pka-C1);Sfur009965(Itpr);Sfur012073(CALML4);Sfur013596(TpnC41C);MSTRG.23839(ADCY9);MSTRG.32397(Hspa2);MSTRG.37219(Creb3l4);MSTRG.37220(Creb3l4);MSTRG.38817(Itpr);MSTRG.4355(HSP70B2);MSTRG.4356(HSP70B2)	K09487+K09487+K17447+K04615+K05704+K04615+K05704+K02183+K04364+K04345+K04958+K02183+K02183+K08049+K03283+K09048+K09048+K04958+K03283+K03283
Metabolism	Carbohydrate metabolism	Butanoate metabolism	5	21	0.339507	1	ko00650	Sfur000207(HMGCS1);Sfur005958(--);Sfur006093(HSD11B2);Sfur012504(HMGCL);MSTRG.29894(ECHS1)	K01641+K00019+K00019+K01640+K07511
Human Diseases	Drug resistance	Antifolate resistance	11	52	0.354272	1	ko01523	Sfur000117(l(2)03659);Sfur000471(ATIC);Sfur005328(SLC46A1);Sfur009985(abcG23);Sfur010215(abcG23);Sfur010345(abcG23);Sfur010548(abcG23);Sfur010905(abcG23);Sfur011914(ABCC1);Sfur012519(abcG23);MSTRG.13338(Tyms)	K05673+K00602+K14613+K05665+K05665+K05665+K05665+K05665+K05665+K05665+K00560
Organismal Systems	Endocrine system	Glucagon signaling pathway	20	99	0.356603	1	ko04922	Sfur000483(PKLR);Sfur000898(T05H10.6);Sfur003765(--);Sfur005723(TpnC41C);Sfur006909(--);Sfur007076(pdhb-1);Sfur007714(ACAC);Sfur008504(Pka-C1);Sfur008511(PyK);Sfur009965(Itpr);Sfur010046(CPT1B);Sfur010434(fgt-1);Sfur012073(CALML4);Sfur013438(Pfk);Sfur013596(TpnC41C);MSTRG.14814(SLC2A3);MSTRG.14815(SLC2A3);MSTRG.37219(Creb3l4);MSTRG.37220(Creb3l4);MSTRG.38817(Itpr)	K00873+K00161+K07299+K02183+K07190+K00162+K11262+K04345+K00873+K04958+K08765+K07299+K02183+K00850+K02183+K07299+K07299+K09048+K09048+K04958
Metabolism	Amino acid metabolism	Valine, leucine and isoleucine degradation	10	47	0.358447	1	ko00280	Sfur000207(HMGCS1);Sfur000240(HADHB);Sfur002093(AGXT2);Sfur005767(ACAA2);Sfur012504(HMGCL);Sfur013135(Aldh2);Sfur014797(Dbt);MSTRG.15727(ACAA2);MSTRG.29894(ECHS1);MSTRG.5712(aldA)	K01641+K07509+K00827+K07508+K01640+K00128+K09699+K07508+K07511+K00128
Human Diseases	Immune diseases	Rheumatoid arthritis	8	37	0.366979	1	ko05323	Sfur001004(atp6v0a1);Sfur005885(cfaD);Sfur007922(TEK);Sfur009516(ATP6V0B);Sfur013642(ATP6V0D1);Sfur014756(Cp1);Sfur014816(Cp1);Sfur014836(Cp1)	K02154+K01365+K05121+K03661+K02146+K01365+K01365+K01365
Human Diseases	Infectious diseases	Bacterial invasion of epithelial cells	12	58	0.374282	1	ko05100	Sfur001362(--);Sfur001869(Act5C);Sfur002202(Src64B);Sfur002555(arpc1a-b);Sfur002767(Src64B);Sfur003731(PXN);Sfur007457(arpc4);Sfur008871(arpc5-b);Sfur009889(Sep2);Sfur013846(--);Sfur014933(CG3430);MSTRG.22969(--)	K17447+K05692+K05704+K05757+K05704+K05760+K05755+K05754+K16939+K23612+K05700+K04707
Human Diseases	Cardiovascular diseases	Fluid shear stress and atherosclerosis	17	85	0.390804	1	ko05418	Sfur000302(Hsp90b1);Sfur000392(Hsp90b1);Sfur001869(Act5C);Sfur002202(Src64B);Sfur002767(Src64B);Sfur005323(Mef2);Sfur005723(TpnC41C);Sfur005885(cfaD);Sfur006841(PTGES);Sfur007797(BMPR2);Sfur010101(sumo3l);Sfur012073(CALML4);Sfur013596(TpnC41C);Sfur014216(GST1);Sfur014756(Cp1);Sfur014816(Cp1);Sfur014836(Cp1)	K09487+K09487+K05692+K05704+K05704+K09260+K02183+K01365+K00799+K04671+K12160+K02183+K02183+K00799+K01365+K01365+K01365
Human Diseases	Cancers	Glioma	9	43	0.391079	1	ko05214	Sfur001362(--);Sfur001378(--);Sfur004581(--);Sfur005342(--);Sfur005723(TpnC41C);Sfur006377(Dlish);Sfur012073(CALML4);Sfur012397(CAMK4);Sfur013596(TpnC41C)	K17447+K05459+K04402+K04402+K02183+K04364+K02183+K05869+K02183
Organismal Systems	Endocrine system	Relaxin signaling pathway	20	101	0.393419	1	ko04926	Sfur000630(--);Sfur001362(--);Sfur001428(--);Sfur002202(Src64B);Sfur002767(Src64B);Sfur003875(--);Sfur005392(--);Sfur006111(--);Sfur006377(Dlish);Sfur008504(Pka-C1);Sfur008892(--);Sfur013478(--);Sfur014872(--);Sfur015094(RXFP2);Sfur015140(--);Sfur015366(--);MSTRG.23839(ADCY9);MSTRG.33770(--);MSTRG.37219(Creb3l4);MSTRG.37220(Creb3l4)	K06237+K17447+K05449+K05704+K05704+K19720+K19720+K06237+K04364+K04345+K19720+K19720+K19720+K04307+K06237+K19720+K08049+K06237+K09048+K09048
Genetic Information Processing	Translation	mRNA surveillance pathway	16	80	0.396571	1	ko03015	Sfur000561(Gspt1);Sfur001236(Sym);Sfur001506(CG7185);Sfur003749(rnps1-b);Sfur004029(ppp1cc-a);Sfur004157(ppp1cc-a);Sfur004612(pabpn1-a);Sfur006256(SYMPK);Sfur006362(SYMPK);Sfur006845(Cbp80);Sfur009741(Rnmt);Sfur012743(CSTF2);Sfur013708(CSTF1);MSTRG.11711(SYMPK);MSTRG.1537(SYMPK);MSTRG.37221(Hrb27C)	K03267+K06100+K14398+K14325+K06269+K06269+K14396+K06100+K06100+K12882+K00565+K14407+K14406+K06100+K06100+K14411
Organismal Systems	Aging	Longevity regulating pathway - mammal	16	80	0.396571	1	ko04211	Sfur001378(--);Sfur001629(--);Sfur004946(Sesn);Sfur005262(foxo);Sfur005716(PAQR3);Sfur005841(RB1CC1);Sfur006427(InR);Sfur007641(--);Sfur007741(CAMKK1);Sfur008091(RB1CC1);Sfur008504(Pka-C1);Sfur009994(cat);Sfur012397(CAMK4);MSTRG.23839(ADCY9);MSTRG.37219(Creb3l4);MSTRG.37220(Creb3l4)	K05459+K04526+K10141+K09408+K07297+K17589+K04527+K07359+K07359+K17589+K04345+K03781+K05869+K08049+K09048+K09048
Organismal Systems	Nervous system	Dopaminergic synapse	19	96	0.399034	1	ko04728	Sfur000422(SLC18B1);Sfur002772(Clk);Sfur003099(grin2b);Sfur003132(DAT);Sfur004029(ppp1cc-a);Sfur004157(ppp1cc-a);Sfur005723(TpnC41C);Sfur007675(Gpr161);Sfur008504(Pka-C1);Sfur009057(AAEL010734);Sfur009965(Itpr);Sfur010310(ple);Sfur010797(Arntl);Sfur012073(CALML4);Sfur013596(TpnC41C);Sfur014303(SLC18A2);MSTRG.37219(Creb3l4);MSTRG.37220(Creb3l4);MSTRG.38817(Itpr)	K08155+K02223+K05210+K05036+K06269+K06269+K02183+K04145+K04345+K01593+K04958+K00501+K02296+K02183+K02183+K08155+K09048+K09048+K04958
Human Diseases	Endocrine and metabolic diseases	Type II diabetes mellitus	7	34	0.436667	1	ko04930	Sfur000483(PKLR);Sfur001629(--);Sfur002233(HK1);Sfur006427(InR);Sfur008511(PyK);MSTRG.25617(Hex-t2);MSTRG.3014(Hex-t2)	K00873+K04526+K00844+K04527+K00873+K00844+K00844
Organismal Systems	Immune system	Platelet activation	21	109	0.442505	1	ko04611	Sfur000156(--);Sfur001358(Gycalpha99B);Sfur001371(MYLK);Sfur001869(Act5C);Sfur002202(Src64B);Sfur002767(Src64B);Sfur003875(--);Sfur004029(ppp1cc-a);Sfur004157(ppp1cc-a);Sfur005392(--);Sfur008504(Pka-C1);Sfur008892(--);Sfur009822(--);Sfur009965(Itpr);Sfur010114(sqh);Sfur013478(--);Sfur014872(--);Sfur015366(--);MSTRG.23839(ADCY9);MSTRG.38817(Itpr);MSTRG.4305(--)	K16059+K12318+K00907+K05692+K05704+K05704+K19720+K06269+K06269+K19720+K04345+K19720+K19477+K04958+K12757+K19720+K19720+K19720+K08049+K04958+K07376
Metabolism	Metabolism of cofactors and vitamins	Riboflavin metabolism	2	8	0.447911	1	ko00740	Sfur012301(BLVRB);Sfur014888(ACP1)	K05901+K14394
Human Diseases	Drug resistance	EGFR tyrosine kinase inhibitor resistance	8	40	0.457925	1	ko01521	Sfur001362(--);Sfur001378(--);Sfur001786(btl);Sfur002202(Src64B);Sfur002767(Src64B);Sfur005262(foxo);Sfur006377(Dlish);Sfur012113(btl)	K17447+K05459+K05093+K05704+K05704+K09408+K04364+K05093
Environmental Information Processing	Signal transduction	TNF signaling pathway	10	51	0.465697	1	ko04668	Sfur000334(Mmp10);Sfur001428(--);Sfur003997(Ser);Sfur004553(Drice);Sfur009743(RPS6KA5);MSTRG.10604(dnm1l);MSTRG.14692(MMP14);MSTRG.31097(DNM1L);MSTRG.37219(Creb3l4);MSTRG.37220(Creb3l4)	K07763+K05449+K06052+K04397+K04445+K17065+K07763+K17065+K09048+K09048
Cellular Processes	Cell growth and death	Oocyte meiosis	20	105	0.467992	1	ko04114	Sfur000038(BUB1);Sfur001378(--);Sfur001474(Anapc4);Sfur001629(--);Sfur003374(--);Sfur004029(ppp1cc-a);Sfur004157(ppp1cc-a);Sfur005415(CycE);Sfur005723(TpnC41C);Sfur006020(ANAPC1);Sfur008504(Pka-C1);Sfur009036(plk1);Sfur009965(Itpr);Sfur012073(CALML4);Sfur012148(plk1);Sfur013596(TpnC41C);Sfur014612(Rps6ka2);MSTRG.23839(ADCY9);MSTRG.36570(Smc1b);MSTRG.38817(Itpr)	K02178+K05459+K03351+K04526+K02365+K06269+K06269+K06626+K02183+K03348+K04345+K06631+K04958+K02183+K06631+K02183+K04373+K08049+K06636+K04958
Human Diseases	Neurodegenerative diseases	Prion diseases	6	30	0.481756	1	ko05020	Sfur003182(SOD1);Sfur008504(Pka-C1);Sfur010462(LanB2);Sfur012055(KIRREL3);MSTRG.34003(Hsc70-3);MSTRG.34004(Hsc70-3)	K04565+K04345+K05635+K06491+K09490+K09490
Organismal Systems	Digestive system	Bile secretion	18	95	0.483629	1	ko04976	Sfur000117(l(2)03659);Sfur001001(SCARB1);Sfur003100(pes);Sfur003517(--);Sfur003765(--);Sfur005780(HMGCR);Sfur005842(pes);Sfur006085(--);Sfur006194(--);Sfur006653(IFRD2);Sfur007895(SCARB2);Sfur008504(Pka-C1);Sfur008731(RXR);Sfur010434(fgt-1);MSTRG.14814(SLC2A3);MSTRG.14815(SLC2A3);MSTRG.23839(ADCY9);MSTRG.8996(--)	K05673+K13885+K13885+K13885+K07299+K00021+K13885+K14360+K14360+K13855+K13885+K04345+K08524+K07299+K07299+K07299+K08049+K13885
Organismal Systems	Endocrine system	Cortisol synthesis and secretion	12	63	0.495678	1	ko04927	Sfur001001(SCARB1);Sfur003100(pes);Sfur003517(--);Sfur005842(pes);Sfur007895(SCARB2);Sfur008504(Pka-C1);Sfur009965(Itpr);MSTRG.23839(ADCY9);MSTRG.37219(Creb3l4);MSTRG.37220(Creb3l4);MSTRG.38817(Itpr);MSTRG.8996(--)	K13885+K13885+K13885+K13885+K13885+K04345+K04958+K08049+K09048+K09048+K04958+K13885
Human Diseases	Cancers	Melanoma	5	25	0.496654	1	ko05218	Sfur001378(--);Sfur004581(--);Sfur005342(--);MSTRG.26165(--);MSTRG.26166(--)	K05459+K04402+K04402+K04358+K04358
Metabolism	Amino acid metabolism	Lysine degradation	16	85	0.500991	1	ko00310	Sfur004090(egg);Sfur006488(Bbox1);Sfur006776(ASH1L);Sfur009221(--);Sfur010039(AGAP012208);Sfur010362(AASS);Sfur012387(SmydA-8);Sfur013065(--);Sfur013135(Aldh2);Sfur013364(NSD2);Sfur014528(--);Sfur015233(--);MSTRG.29894(ECHS1);MSTRG.33352(Smyd4);MSTRG.4286(--);MSTRG.5712(aldA)	K11421+K00471+K06101+K11426+K11703+K14157+K11426+K11426+K00128+K11424+K11419+K11426+K07511+K11426+K11426+K00128
Cellular Processes	Cellular community - eukaryotes	Tight junction	24	129	0.508467	1	ko04530	Sfur000269(alphaTub84B);Sfur000804(--);Sfur000902(Mlc1);Sfur000970(zip);Sfur000982(l(2)gl);Sfur001236(Sym);Sfur001869(Act5C);Sfur002202(Src64B);Sfur002272(alphaTub84B);Sfur002696(alphaTub84B);Sfur002767(Src64B);Sfur005880(PCNA);Sfur006256(SYMPK);Sfur006362(SYMPK);Sfur008504(Pka-C1);Sfur010114(sqh);Sfur010699(At1g62600);Sfur011784(TUBA8);Sfur011930(tba-2);Sfur012596(RAP2C);Sfur014357(zip);MSTRG.11…	K07374+K10352+K12751+K10352+K06094+K06100+K05692+K05704+K07374+K07374+K05704+K04802+K06100+K06100+K04345+K12757+K05631+K07374+K07374+K07839+K10352+K06100+K06100+K07374
Human Diseases	Infectious diseases	Vibrio cholerae infection	10	53	0.518418	1	ko05110	Sfur001004(atp6v0a1);Sfur001043(KdelR);Sfur001869(Act5C);Sfur005994(SEC61G);Sfur006380(SEC61A2);Sfur008504(Pka-C1);Sfur008961(SEC61B);Sfur009516(ATP6V0B);Sfur013642(ATP6V0D1);MSTRG.23839(ADCY9)	K02154+K10949+K05692+K07342+K10956+K04345+K09481+K03661+K02146+K08049
Human Diseases	Cancers	Prostate cancer	10	53	0.518418	1	ko05215	Sfur000302(Hsp90b1);Sfur000392(Hsp90b1);Sfur001378(--);Sfur001629(--);Sfur001786(btl);Sfur005415(CycE);Sfur006377(Dlish);Sfur012113(btl);MSTRG.37219(Creb3l4);MSTRG.37220(Creb3l4)	K09487+K09487+K05459+K04526+K05093+K06626+K04364+K05093+K09048+K09048
Human Diseases	Drug resistance	Platinum drug resistance	7	37	0.532235	1	ko01524	Sfur002167(TOP2);Sfur006233(ATP7A);Sfur006841(PTGES);Sfur009752(BIRC6);Sfur012465(AAEL007634);Sfur014216(GST1);Sfur015216(MSH2)	K03164+K17686+K00799+K08731+K10847+K00799+K08735
Organismal Systems	Immune system	Cytosolic DNA-sensing pathway	5	26	0.53401	1	ko04623	Sfur000753(POLR3F);Sfur004491(POLR2E);Sfur005895(RpII18);Sfur010893(TREX1);Sfur015340(POLR3K)	K03025+K03013+K03014+K10790+K03019
Metabolism	Glycan biosynthesis and metabolism	Glycosaminoglycan biosynthesis - chondroitin sulfate / dermatan sulfate	3	15	0.538544	1	ko00532	Sfur002175(pip);Sfur007638(Chst11);Sfur007723(CHST11)	K03193+K01017+K01017
Metabolism	Metabolism of cofactors and vitamins	Folate biosynthesis	6	32	0.549519	1	ko00790	Sfur001205(AKR1B1);Sfur008684(MTARC1);Sfur010310(ple);Sfur011127(QDPR);Sfur011383(Pcd);MSTRG.27383(se)	K00011+K15631+K00501+K00357+K01724+K00310
Human Diseases	Infectious diseases	Pertussis	6	32	0.549519	1	ko05133	Sfur004553(Drice);Sfur005723(TpnC41C);Sfur011206(--);Sfur011999(--);Sfur012073(CALML4);Sfur013596(TpnC41C)	K04397+K02183+K12800+K03175+K02183+K02183
Human Diseases	Cancers	Non-small cell lung cancer	6	32	0.549519	1	ko05223	Sfur004581(--);Sfur005262(foxo);Sfur005342(--);Sfur006377(Dlish);Sfur008719(Alk);Sfur008731(RXR)	K04402+K09408+K04402+K04364+K05119+K08524
Environmental Information Processing	Membrane transport	ABC transporters	15	82	0.552445	1	ko02010	Sfur000117(l(2)03659);Sfur001915(ABCG4);Sfur002165(ABCG4);Sfur002197(ABCG1);Sfur002977(Abcg1);Sfur009985(abcG23);Sfur010215(abcG23);Sfur010345(abcG23);Sfur010521(ABCD);Sfur010548(abcG23);Sfur010905(abcG23);Sfur011914(ABCC1);Sfur012519(abcG23);Sfur013227(ABCG21);MSTRG.1283(ABCG4)	K05673+K05680+K05679+K05680+K05680+K05665+K05665+K05665+K05676+K05665+K05665+K05665+K05665+K05680+K05680
Organismal Systems	Endocrine system	GnRH signaling pathway	15	82	0.552445	1	ko04912	Sfur000334(Mmp10);Sfur002202(Src64B);Sfur002767(Src64B);Sfur005308(GNRHR2);Sfur005618(GNRHR);Sfur005723(TpnC41C);Sfur005801(--);Sfur006377(Dlish);Sfur008504(Pka-C1);Sfur009965(Itpr);Sfur012073(CALML4);Sfur013596(TpnC41C);MSTRG.14692(MMP14);MSTRG.23839(ADCY9);MSTRG.38817(Itpr)	K07763+K05704+K05704+K04280+K04280+K02183+K04280+K04364+K04345+K04958+K02183+K02183+K07763+K08049+K04958
Organismal Systems	Nervous system	Long-term potentiation	11	60	0.555616	1	ko04720	Sfur003099(grin2b);Sfur004029(ppp1cc-a);Sfur004157(ppp1cc-a);Sfur005723(TpnC41C);Sfur008504(Pka-C1);Sfur009965(Itpr);Sfur012073(CALML4);Sfur012397(CAMK4);Sfur013596(TpnC41C);Sfur014612(Rps6ka2);MSTRG.38817(Itpr)	K05210+K06269+K06269+K02183+K04345+K04958+K02183+K05869+K02183+K04373+K04958
Metabolism	Carbohydrate metabolism	Pyruvate metabolism	9	49	0.558386	1	ko00620	Sfur000483(PKLR);Sfur000898(T05H10.6);Sfur002786(MDH2);Sfur007076(pdhb-1);Sfur007714(ACAC);Sfur008511(PyK);Sfur013135(Aldh2);Sfur013861(--);MSTRG.5712(aldA)	K00873+K00161+K00026+K00162+K11262+K00873+K00128+K00026+K00128
Organismal Systems	Excretory system	Vasopressin-regulated water reabsorption	7	38	0.562698	1	ko04962	Sfur001116(ctp);Sfur004159(DCTN2-p50);Sfur008504(Pka-C1);Sfur012839(Dhc64C);MSTRG.23839(ADCY9);MSTRG.37219(Creb3l4);MSTRG.37220(Creb3l4)	K10418+K10424+K04345+K10413+K08049+K09048+K09048
Organismal Systems	Endocrine system	Parathyroid hormone synthesis, secretion and action	14	77	0.563696	1	ko04928	Sfur000334(Mmp10);Sfur003173(PTH1R);Sfur003228(PTH1R);Sfur003786(PTH1R);Sfur005323(Mef2);Sfur008504(Pka-C1);Sfur008731(RXR);Sfur009965(Itpr);Sfur010316(Pde7b);MSTRG.14692(MMP14);MSTRG.23839(ADCY9);MSTRG.37219(Creb3l4);MSTRG.37220(Creb3l4);MSTRG.38817(Itpr)	K07763+K04585+K04585+K04585+K09260+K04345+K08524+K04958+K13293+K07763+K08049+K09048+K09048+K04958
Environmental Information Processing	Signal transduction	MAPK signaling pathway	26	144	0.573512	1	ko04010	Sfur000219(FLNA);Sfur000915(--);Sfur001378(--);Sfur001428(--);Sfur001629(--);Sfur001786(btl);Sfur003502(NLK);Sfur004581(--);Sfur005342(--);Sfur006377(Dlish);Sfur006427(InR);Sfur007922(TEK);Sfur008504(Pka-C1);Sfur009743(RPS6KA5);Sfur010613(Map3k13);Sfur011999(--);Sfur012113(btl);Sfur014606(--);Sfur014612(Rps6ka2);Sfur015260(Dusp10);MSTRG.26165(--);MSTRG.26166(--);MSTRG.32397(Hspa2);MSTRG.34922(DUS…	K04437+K04870+K05459+K05449+K04526+K05093+K04468+K04402+K04402+K04364+K04527+K05121+K04345+K04445+K04422+K03175+K05093+K02308+K04373+K20216+K04358+K04358+K03283+K20216+K03283+K03283
Human Diseases	Cancers	Small cell lung cancer	11	61	0.579443	1	ko05222	Sfur000630(--);Sfur004581(--);Sfur005342(--);Sfur005415(CycE);Sfur006111(--);Sfur007115(LanB1);Sfur008731(RXR);Sfur010462(LanB2);Sfur011999(--);Sfur015140(--);MSTRG.33770(--)	K06237+K04402+K04402+K06626+K06237+K05636+K08524+K05635+K03175+K06237+K06237
Human Diseases	Cancers	Basal cell carcinoma	6	33	0.581856	1	ko05217	Sfur000480(NPEPL1);Sfur001985(fz2);Sfur004581(--);Sfur004876(ptc);Sfur005342(--);Sfur014187(fzd10-a)	K02085+K02375+K04402+K06225+K04402+K02842
Genetic Information Processing	Folding, sorting and degradation	RNA degradation	12	67	0.588689	1	ko03018	Sfur005474(CNOT10);Sfur005516(LSM6);Sfur007589(BTG1);Sfur008909(Mphosph6);Sfur009049(DCPS);Sfur010562(LSM5);Sfur011288(EXOSC7);Sfur011408(Lsm1);Sfur013438(Pfk);Sfur014004(LSM3);MSTRG.22416(DCPS);MSTRG.31317(LSM2)	K12607+K12625+K14443+K12593+K12584+K12624+K12589+K12620+K00850+K12622+K12584+K12621
Cellular Processes	Cell growth and death	p53 signaling pathway	7	39	0.592229	1	ko04115	Sfur001378(--);Sfur002601(RnrS);Sfur004581(--);Sfur004946(Sesn);Sfur005342(--);Sfur005415(CycE);Sfur011162(--)	K05459+K10808+K04402+K10141+K04402+K06626+K04506
Organismal Systems	Digestive system	Mineral absorption	7	39	0.592229	1	ko04978	Sfur001656(FER1);Sfur002888(Slc8a1);Sfur005328(SLC46A1);Sfur008868(ATOX1);Sfur011902(Slc8a1);Sfur013450(ClC-a);Sfur013958(Mvl)	K00522+K05849+K14613+K07213+K05849+K05011+K21398
Metabolism	Glycan biosynthesis and metabolism	Various types of N-glycan biosynthesis	10	56	0.594029	1	ko00513	Sfur000343(Alg9);Sfur001670(fdl);Sfur004835(CG8399);Sfur005031(Dad1);Sfur007924(RPN1);Sfur010876(Man1b1);Sfur011285(Stt3b);Sfur013406(RPN2);Sfur014350(RPN1);MSTRG.14666(Stt3a)	K03846+K12373+K03843+K12668+K12666+K23741+K07151+K12667+K12666+K07151
Organismal Systems	Endocrine system	PPAR signaling pathway	11	62	0.602706	1	ko03320	Sfur000207(HMGCS1);Sfur000330(D11DS);Sfur007578(Slc27a4);Sfur008731(RXR);Sfur010046(CPT1B);Sfur012424(D11DS);Sfur012982(Acsl1);Sfur013200(Scd4);Sfur013234(Scd1);Sfur013434(D11DS);Sfur013479(SCD5)	K01641+K00507+K08745+K08524+K08765+K00507+K01897+K00507+K00507+K00507+K00507
Metabolism	Amino acid metabolism	Alanine, aspartate and glutamate metabolism	6	34	0.612969	1	ko00250	Sfur002093(AGXT2);Sfur002180(GPT);Sfur002616(gpt2l);Sfur003438(r);Sfur004784(Gfpt2);Sfur015396(Prat)	K00827+K00814+K00814+K11540+K00820+K00764
Organismal Systems	Immune system	C-type lectin receptor signaling pathway	10	57	0.61798	1	ko04625	Sfur001911(COLEC12);Sfur002202(Src64B);Sfur002767(Src64B);Sfur005723(TpnC41C);Sfur008253(Ptpn11);Sfur009965(Itpr);Sfur011206(--);Sfur012073(CALML4);Sfur013596(TpnC41C);MSTRG.38817(Itpr)	K10059+K05704+K05704+K02183+K07293+K04958+K12800+K02183+K02183+K04958
Cellular Processes	Cell growth and death	Apoptosis - fly	13	74	0.618322	1	ko04214	Sfur000067(Parp);Sfur004042(br);Sfur004553(Drice);Sfur005445(PRDX4);Sfur005769(Lam);Sfur008362(boka);Sfur011873(kay);Sfur011999(--);Sfur013509(Tspo);Sfur015260(Dusp10);MSTRG.10604(dnm1l);MSTRG.31097(DNM1L);MSTRG.34922(DUSP10)	K24070+K02174+K04397+K03386+K07611+K20017+K09031+K03175+K05770+K20216+K17065+K17065+K20216
Human Diseases	Cancers	Bladder cancer	3	17	0.628562	1	ko05219	Sfur002202(Src64B);Sfur002767(Src64B);Sfur009743(RPS6KA5)	K05704+K05704+K04445
Genetic Information Processing	Folding, sorting and degradation	SNARE interactions in vesicular transport	4	23	0.632543	1	ko04130	Sfur003329(--);Sfur003666(unc-64);Sfur004599(use1);Sfur010881(--)	K04560+K04560+K08507+K08491
Environmental Information Processing	Signal transduction	Ras signaling pathway	22	126	0.641014	1	ko04014	Sfur000195(RASA3);Sfur000526(--);Sfur001362(--);Sfur001378(--);Sfur001428(--);Sfur001629(--);Sfur001786(btl);Sfur003099(grin2b);Sfur003362(--);Sfur005723(TpnC41C);Sfur006377(Dlish);Sfur006427(InR);Sfur007922(TEK);Sfur008253(Ptpn11);Sfur008504(Pka-C1);Sfur012073(CALML4);Sfur012113(btl);Sfur013596(TpnC41C);MSTRG.26165(--);MSTRG.26166(--);MSTRG.28015(dl);MSTRG.9056(Brap)	K12380+K01047+K17447+K05459+K05449+K04526+K05093+K05210+K01047+K02183+K04364+K04527+K05121+K07293+K04345+K02183+K05093+K02183+K04358+K04358+K09254+K10632
Human Diseases	Infectious diseases	Legionellosis	6	35	0.642743	1	ko05134	Sfur004553(Drice);Sfur004777(TER94);MSTRG.24264(BNIP3);MSTRG.32397(Hspa2);MSTRG.4355(HSP70B2);MSTRG.4356(HSP70B2)	K04397+K13525+K15464+K03283+K03283+K03283
Human Diseases	Infectious diseases	HTLV-I infection	26	150	0.662727	1	ko05166	Sfur000141(--);Sfur000246(--);Sfur000349(to);Sfur000352(--);Sfur000387(anon-3B1.2);Sfur000393(to);Sfur000419(Calr);Sfur000901(--);Sfur001474(Anapc4);Sfur003374(--);Sfur003765(--);Sfur003977(to);Sfur004410(FDPS);Sfur005415(CycE);Sfur006020(ANAPC1);Sfur007299(--);Sfur008504(Pka-C1);Sfur010434(fgt-1);Sfur011153(BUB3);Sfur012535(TRRAP);Sfur013509(Tspo);MSTRG.14814(SLC2A3);MSTRG.14815(SLC2A3);MSTRG.23…	K07936+K07936+K07936+K07936+K07936+K07936+K08057+K07936+K03351+K02365+K07299+K07936+K00787+K06626+K03348+K07936+K04345+K07299+K02180+K08874+K05770+K07299+K07299+K08049+K09048+K09048
Metabolism	Metabolism of cofactors and vitamins	Thiamine metabolism	3	18	0.668757	1	ko00730	Sfur011670(AK7);Sfur014888(ACP1);Sfur015419(Ak8)	K00939+K14394+K00939
Organismal Systems	Environmental adaptation	Circadian rhythm	3	18	0.668757	1	ko04710	Sfur002772(Clk);Sfur010763(Clock);Sfur010797(Arntl)	K02223+K09026+K02296
Metabolism	Metabolism of cofactors and vitamins	Ubiquinone and other terpenoid-quinone biosynthesis	2	12	0.676244	1	ko00130	Sfur006151(4cl3);MSTRG.19046(4CL)	K01904+K01904
Metabolism	Glycan biosynthesis and metabolism	Other glycan degradation	5	31	0.697959	1	ko00511	Sfur000028(GD10667);Sfur001670(fdl);Sfur010098(BRAFLDRAFT_56888);Sfur011466(MAN2B1);Sfur014540(GLB1)	K01444+K12373+K01206+K12311+K12309
Human Diseases	Immune diseases	Systemic lupus erythematosus	4	25	0.699932	1	ko05322	Sfur003099(grin2b);Sfur005278(H2AZ2);Sfur008171(SmB);Sfur010464(SmD1)	K05210+K11251+K11086+K11087
Organismal Systems	Nervous system	Neurotrophin signaling pathway	12	73	0.711708	1	ko04722	Sfur001362(--);Sfur005262(foxo);Sfur005723(TpnC41C);Sfur006377(Dlish);Sfur008253(Ptpn11);Sfur009743(RPS6KA5);Sfur011999(--);Sfur012073(CALML4);Sfur012397(CAMK4);Sfur013596(TpnC41C);Sfur014612(Rps6ka2);Sfur015212(C3G)	K17447+K09408+K02183+K04364+K07293+K04445+K03175+K02183+K05869+K02183+K04373+K06277
Environmental Information Processing	Signaling molecules and interaction	ECM-receptor interaction	13	79	0.714717	1	ko04512	Sfur000630(--);Sfur000702(Svopl);Sfur001161(Agrn);Sfur006111(--);Sfur006631(Sv2b);Sfur006971(Agrn);Sfur007115(LanB1);Sfur007281(Svop);Sfur008550(Hspg2);Sfur009397(--);Sfur010462(LanB2);Sfur015140(--);MSTRG.33770(--)	K06237+K06258+K06254+K06237+K06258+K06238+K05636+K06258+K06255+K06255+K05635+K06237+K06237
Organismal Systems	Excretory system	Endocrine and other factor-regulated calcium reabsorption	8	50	0.723194	1	ko04961	Sfur002888(Slc8a1);Sfur003173(PTH1R);Sfur003228(PTH1R);Sfur003786(PTH1R);Sfur004248(AP2M1);Sfur008504(Pka-C1);Sfur011902(Slc8a1);MSTRG.23839(ADCY9)	K05849+K04585+K04585+K04585+K11826+K04345+K05849+K08049
Environmental Information Processing	Signal transduction	Hippo signaling pathway - multiple species	5	32	0.725448	1	ko04392	Sfur002336(ft);Sfur002901(ft);Sfur003094(ft);Sfur012755(Cad89D);Sfur013940(yap1)	K16669+K16669+K16669+K16669+K16687
Organismal Systems	Aging	Longevity regulating pathway - multiple species	11	68	0.727689	1	ko04213	Sfur001378(--);Sfur001629(--);Sfur003182(SOD1);Sfur005262(foxo);Sfur006427(InR);Sfur008504(Pka-C1);Sfur009994(cat);MSTRG.23839(ADCY9);MSTRG.32397(Hspa2);MSTRG.4355(HSP70B2);MSTRG.4356(HSP70B2)	K05459+K04526+K04565+K09408+K04527+K04345+K03781+K08049+K03283+K03283+K03283
Environmental Information Processing	Signal transduction	NF-kappa B signaling pathway	4	26	0.7301	1	ko04064	Sfur000067(Parp);Sfur004581(--);Sfur005342(--);Sfur011999(--)	K24070+K04402+K04402+K03175
Organismal Systems	Endocrine system	Renin-angiotensin system	4	26	0.7301	1	ko04614	Sfur012117(--);Sfur012871(PREP);Sfur013742(Prep);MSTRG.35605(ANPEP)	K11140+K01322+K01322+K11140
Organismal Systems	Sensory system	Inflammatory mediator regulation of TRP channels	13	80	0.732041	1	ko04750	Sfur001378(--);Sfur002202(Src64B);Sfur002767(Src64B);Sfur004029(ppp1cc-a);Sfur004157(ppp1cc-a);Sfur005723(TpnC41C);Sfur008504(Pka-C1);Sfur009965(Itpr);Sfur012073(CALML4);Sfur013596(TpnC41C);Sfur014776(pyx);MSTRG.23839(ADCY9);MSTRG.38817(Itpr)	K05459+K05704+K05704+K06269+K06269+K02183+K04345+K04958+K02183+K02183+K04984+K08049+K04958
Cellular Processes	Cell growth and death	Apoptosis - multiple species	3	20	0.739342	1	ko04215	Sfur004553(Drice);Sfur008362(boka);Sfur009752(BIRC6)	K04397+K20017+K08731
Environmental Information Processing	Signal transduction	Hedgehog signaling pathway	6	39	0.747177	1	ko04340	Sfur002002(--);Sfur002672(Lrp2);Sfur004876(ptc);Sfur006821(csnk1g1);Sfur006865(Csnk1g2);Sfur008504(Pka-C1)	K06233+K06233+K06225+K08958+K08958+K04345
Environmental Information Processing	Signal transduction	Hedgehog signaling pathway - fly	6	39	0.747177	1	ko04341	Sfur004876(ptc);Sfur006821(csnk1g1);Sfur006865(Csnk1g2);Sfur008504(Pka-C1);MSTRG.10902(iHog);MSTRG.36634(IHH)	K06225+K08958+K08958+K04345+K20245+K06224
Metabolism	Glycan biosynthesis and metabolism	Glycosylphosphatidylinositol(GPI)-anchor biosynthesis	4	27	0.757935	1	ko00563	Sfur002925(PIGN);Sfur004613(PIG-K);Sfur005629(Pigu);MSTRG.8273(GPAA1)	K05285+K05290+K05293+K05289
Human Diseases	Cancers	Choline metabolism in cancer	12	76	0.763677	1	ko05231	Sfur000297(AGAP006244);Sfur003418(--);Sfur004571(--);Sfur004872(ChT);Sfur005579(Orct);Sfur006218(CHKB);Sfur006377(Dlish);Sfur014557(Orct2);Sfur014764(AGAP010343);Sfur014772(Slc22a13);Sfur015246(Orct);MSTRG.17006(PLPP1)	K06515+K06515+K01080+K14387+K08202+K14156+K04364+K08200+K15377+K08200+K08202+K01080
Organismal Systems	Nervous system	Long-term depression	6	40	0.769494	1	ko04730	Sfur001358(Gycalpha99B);Sfur001378(--);Sfur009822(--);Sfur009965(Itpr);MSTRG.38817(Itpr);MSTRG.4305(--)	K12318+K05459+K19477+K04958+K04958+K07376
Organismal Systems	Nervous system	Synaptic vesicle cycle	11	71	0.779497	1	ko04721	Sfur000422(SLC18B1);Sfur001004(atp6v0a1);Sfur003132(DAT);Sfur003329(--);Sfur003666(unc-64);Sfur003989(LHT2);Sfur004248(AP2M1);Sfur009516(ATP6V0B);Sfur010314(LHT1);Sfur013642(ATP6V0D1);Sfur014303(SLC18A2)	K08155+K02154+K05036+K04560+K04560+K15015+K11826+K03661+K15015+K02146+K08155
Human Diseases	Endocrine and metabolic diseases	AGE-RAGE signaling pathway in diabetic complications	11	71	0.779497	1	ko04933	Sfur000630(--);Sfur001428(--);Sfur003875(--);Sfur005392(--);Sfur006111(--);Sfur008892(--);Sfur013478(--);Sfur014872(--);Sfur015140(--);Sfur015366(--);MSTRG.33770(--)	K06237+K05449+K19720+K19720+K06237+K19720+K19720+K19720+K06237+K19720+K06237
Human Diseases	Cancers	Hepatocellular carcinoma	16	101	0.78237	1	ko05225	Sfur000480(NPEPL1);Sfur001362(--);Sfur001869(Act5C);Sfur001985(fz2);Sfur003025(ACTL6B);Sfur004581(--);Sfur005342(--);Sfur006377(Dlish);Sfur006841(PTGES);Sfur006908(Bap60);Sfur011893(SMARCC2);Sfur014187(fzd10-a);Sfur014216(GST1);Sfur014542(osa);Sfur014709(brm);MSTRG.32937(--)	K02085+K17447+K05692+K02375+K11652+K04402+K04402+K04364+K00799+K11650+K11649+K02842+K00799+K11653+K11647+K11653
Organismal Systems	Immune system	RIG-I-like receptor signaling pathway	4	28	0.783492	1	ko04622	Sfur011999(--);Sfur013204(otud5-a);Sfur015008(TKFC);Sfur015056(TKFC)	K03175+K12655+K00863+K00863
Human Diseases	Infectious diseases	Toxoplasmosis	7	47	0.785861	1	ko05145	Sfur004985(Cyp1);Sfur007115(LanB1);Sfur010462(LanB2);Sfur011999(--);MSTRG.32397(Hspa2);MSTRG.4355(HSP70B2);MSTRG.4356(HSP70B2)	K09565+K05636+K05635+K03175+K03283+K03283+K03283
Human Diseases	Infectious diseases	Salmonella infection	29	178	0.793049	1	ko05132	Sfur000219(FLNA);Sfur000302(Hsp90b1);Sfur000392(Hsp90b1);Sfur000804(--);Sfur000902(Mlc1);Sfur000970(zip);Sfur001116(ctp);Sfur001869(Act5C);Sfur002555(arpc1a-b);Sfur004553(Drice);Sfur004862(brk1-b);Sfur005709(DYNLRB2);Sfur006235(Cse1);Sfur006325(Cse1);Sfur007457(arpc4);Sfur008187(GAPDH);Sfur008231(--);Sfur008871(arpc5-b);Sfur009446(chic);Sfur010114(sqh);Sfur010962(--);Sfur011206(--);Sfur011641(Sec…	K04437+K09487+K09487+K10352+K12751+K10352+K10418+K05692+K05757+K04397+K05752+K10419+K18423+K18423+K05755+K00134+K23934+K05754+K05759+K12757+K00914+K12800+K06111+K03175+K10413+K23612+K00914+K10352+K00914
Human Diseases	Cancers	Gastric cancer	13	84	0.794361	1	ko05226	Sfur000480(NPEPL1);Sfur001362(--);Sfur001786(btl);Sfur001985(fz2);Sfur004581(--);Sfur005342(--);Sfur005415(CycE);Sfur006377(Dlish);Sfur008731(RXR);Sfur012113(btl);Sfur014187(fzd10-a);MSTRG.26165(--);MSTRG.26166(--)	K02085+K17447+K05093+K02375+K04402+K04402+K06626+K04364+K08524+K05093+K02842+K04358+K04358
Human Diseases	Cancers	Endometrial cancer	5	35	0.796929	1	ko05213	Sfur000480(NPEPL1);Sfur004581(--);Sfur005262(foxo);Sfur005342(--);Sfur006377(Dlish)	K02085+K04402+K09408+K04402+K04364
Organismal Systems	Endocrine system	Regulation of lipolysis in adipocyte	9	60	0.797955	1	ko04923	Sfur001415(Pnpla2);Sfur001629(--);Sfur006427(InR);Sfur008504(Pka-C1);Sfur009822(--);Sfur011918(--);Sfur012014(--);MSTRG.23839(ADCY9);MSTRG.4305(--)	K16816+K04526+K04527+K04345+K19477+K16816+K16816+K08049+K07376
Metabolism	Amino acid metabolism	Phenylalanine metabolism	1	8	0.802997	1	ko00360	Sfur009057(AAEL010734)	K01593
Metabolism	Energy metabolism	Sulfur metabolism	1	8	0.802997	1	ko00920	Sfur002064(selenbp1-a)	K17285
Environmental Information Processing	Signal transduction	VEGF signaling pathway	4	29	0.806854	1	ko04370	Sfur001362(--);Sfur002202(Src64B);Sfur002767(Src64B);Sfur003731(PXN)	K17447+K05704+K05704+K05760
Environmental Information Processing	Signal transduction	FoxO signaling pathway	13	85	0.80819	1	ko04068	Sfur001378(--);Sfur001629(--);Sfur003502(NLK);Sfur004581(--);Sfur005262(foxo);Sfur005342(--);Sfur006377(Dlish);Sfur006427(InR);Sfur009036(plk1);Sfur009496(SAK);Sfur009994(cat);Sfur012148(plk1);MSTRG.24264(BNIP3)	K05459+K04526+K04468+K04402+K09408+K04402+K04364+K04527+K06631+K08863+K03781+K06631+K15464
Organismal Systems	Circulatory system	Vascular smooth muscle contraction	18	115	0.809207	1	ko04270	Sfur000526(--);Sfur000902(Mlc1);Sfur001358(Gycalpha99B);Sfur001371(MYLK);Sfur003362(--);Sfur004029(ppp1cc-a);Sfur004096(calcrl);Sfur004157(ppp1cc-a);Sfur005723(TpnC41C);Sfur008504(Pka-C1);Sfur009965(Itpr);Sfur011124(Avpr1b);Sfur012073(CALML4);Sfur012563(Calcrl);Sfur013596(TpnC41C);MSTRG.23839(ADCY9);MSTRG.38817(Itpr);MSTRG.4305(--)	K01047+K12751+K12318+K00907+K01047+K06269+K04577+K06269+K02183+K04345+K04958+K04226+K02183+K04577+K02183+K08049+K04958+K07376
Human Diseases	Infectious diseases	Hepatitis B	11	73	0.809912	1	ko05161	Sfur002202(Src64B);Sfur002767(Src64B);Sfur005415(CycE);Sfur005880(PCNA);Sfur006377(Dlish);Sfur008550(Hspg2);Sfur009397(--);Sfur009752(BIRC6);Sfur011999(--);MSTRG.37219(Creb3l4);MSTRG.37220(Creb3l4)	K05704+K05704+K06626+K04802+K04364+K06255+K06255+K08731+K03175+K09048+K09048
Organismal Systems	Endocrine system	Insulin signaling pathway	21	133	0.811777	1	ko04910	Sfur001362(--);Sfur001629(--);Sfur002233(HK1);Sfur002528(Fasn);Sfur004029(ppp1cc-a);Sfur004157(ppp1cc-a);Sfur005723(TpnC41C);Sfur006377(Dlish);Sfur006427(InR);Sfur006909(--);Sfur007463(FASN);Sfur007714(ACAC);Sfur008504(Pka-C1);Sfur010278(hmces);Sfur012073(CALML4);Sfur012428(IQCA1);Sfur013596(TpnC41C);Sfur015212(C3G);MSTRG.22969(--);MSTRG.25617(Hex-t2);MSTRG.3014(Hex-t2)	K17447+K04526+K00844+K00665+K06269+K06269+K02183+K04364+K04527+K07190+K00665+K11262+K04345+K05696+K02183+K00665+K02183+K06277+K04707+K00844+K00844
Organismal Systems	Digestive system	Gastric acid secretion	10	68	0.826001	1	ko04971	Sfur001371(MYLK);Sfur001869(Act5C);Sfur005723(TpnC41C);Sfur006653(IFRD2);Sfur008504(Pka-C1);Sfur009965(Itpr);Sfur012073(CALML4);Sfur013596(TpnC41C);MSTRG.23839(ADCY9);MSTRG.38817(Itpr)	K00907+K05692+K02183+K13855+K04345+K04958+K02183+K02183+K08049+K04958
Metabolism	Carbohydrate metabolism	Glyoxylate and dicarboxylate metabolism	6	43	0.827575	1	ko00630	Sfur000157(HAO1);Sfur000870(hoga1);Sfur002786(MDH2);Sfur009994(cat);Sfur011418(Aco1);Sfur013861(--)	K11517+K18123+K00026+K03781+K01681+K00026
Human Diseases	Cancers	Breast cancer	12	81	0.835201	1	ko05224	Sfur000480(NPEPL1);Sfur001362(--);Sfur001378(--);Sfur001985(fz2);Sfur003997(Ser);Sfur004581(--);Sfur005342(--);Sfur006252(--);Sfur006377(Dlish);Sfur014187(fzd10-a);MSTRG.26165(--);MSTRG.26166(--)	K02085+K17447+K05459+K02375+K06052+K04402+K04402+K21635+K04364+K02842+K04358+K04358
Cellular Processes	Cellular community - eukaryotes	Adherens junction	11	75	0.837101	1	ko04520	Sfur001869(Act5C);Sfur002202(Src64B);Sfur002767(Src64B);Sfur003502(NLK);Sfur004373(Iqgap1);Sfur006427(InR);Sfur009753(--);Sfur010278(hmces);Sfur013846(--);Sfur014888(ACP1);Sfur014933(CG3430)	K05692+K05704+K05704+K04468+K16848+K04527+K05706+K05696+K23612+K14394+K05700
Metabolism	Amino acid metabolism	Cysteine and methionine metabolism	7	50	0.837548	1	ko00270	Sfur000372(CTH);Sfur002093(AGXT2);Sfur002786(MDH2);Sfur008345(apip);Sfur008704(HMT-2);Sfur009313(DNMT);Sfur013861(--)	K01758+K00827+K00026+K08964+K00547+K00558+K00026
Human Diseases	Endocrine and metabolic diseases	Type I diabetes mellitus	1	9	0.839226	1	ko04940	Sfur001629(--)	K04526
Environmental Information Processing	Signal transduction	Sphingolipid signaling pathway	10	69	0.839597	1	ko04071	Sfur009985(abcG23);Sfur010215(abcG23);Sfur010345(abcG23);Sfur010548(abcG23);Sfur010905(abcG23);Sfur011914(ABCC1);Sfur012437(SMPD1);Sfur012519(abcG23);Sfur012811(Cers6);Sfur013298(CDase)	K05665+K05665+K05665+K05665+K05665+K05665+K12350+K05665+K23727+K12349
Human Diseases	Endocrine and metabolic diseases	Cushing syndrome	18	118	0.841923	1	ko04934	Sfur000480(NPEPL1);Sfur001001(SCARB1);Sfur001985(fz2);Sfur003100(pes);Sfur003517(--);Sfur005415(CycE);Sfur005842(pes);Sfur007895(SCARB2);Sfur008504(Pka-C1);Sfur009965(Itpr);Sfur014187(fzd10-a);Sfur014895(WDR5);MSTRG.2001(Pde11);MSTRG.23839(ADCY9);MSTRG.37219(Creb3l4);MSTRG.37220(Creb3l4);MSTRG.38817(Itpr);MSTRG.8996(--)	K02085+K13885+K02375+K13885+K13885+K06626+K13885+K13885+K04345+K04958+K02842+K14963+K13298+K08049+K09048+K09048+K04958+K13885
Metabolism	Glycan biosynthesis and metabolism	Mannose type O-glycan biosyntheis	3	24	0.844272	1	ko00515	Sfur005302(FKTN);Sfur009196(rt);Sfur012142(tw)	K19872+K00728+K00728
Organismal Systems	Excretory system	Aldosterone-regulated sodium reabsorption	3	24	0.844272	1	ko04960	Sfur001378(--);Sfur001629(--);Sfur006427(InR)	K05459+K04526+K04527
Metabolism	Amino acid metabolism	Arginine biosynthesis	2	17	0.847191	1	ko00220	Sfur002180(GPT);Sfur002616(gpt2l)	K00814+K00814
Environmental Information Processing	Signal transduction	Jak-STAT signaling pathway	4	31	0.847403	1	ko04630	Sfur001129(CISH);Sfur006377(Dlish);Sfur008253(Ptpn11);Sfur008761(SOCS5)	K04701+K04364+K07293+K04698
Human Diseases	Cancers	Pathways in cancer	46	285	0.858631	1	ko05200	Sfur000302(Hsp90b1);Sfur000392(Hsp90b1);Sfur000480(NPEPL1);Sfur000630(--);Sfur001378(--);Sfur001428(--);Sfur001786(btl);Sfur001985(fz2);Sfur002933(Mtor);Sfur003765(--);Sfur003997(Ser);Sfur004553(Drice);Sfur004581(--);Sfur004876(ptc);Sfur005342(--);Sfur005415(CycE);Sfur005723(TpnC41C);Sfur006111(--);Sfur006252(--);Sfur006284(fend);Sfur006377(Dlish);Sfur006413(fend);Sfur006841(PTGES);Sfur007115(Lan…	K09487+K09487+K02085+K06237+K05459+K05449+K05093+K02375+K09291+K07299+K06052+K04397+K04402+K06225+K04402+K06626+K02183+K06237+K21635+K05126+K04364+K05126+K00799+K05636+K04345+K05119+K08524+K04445+K08731+K07299+K05635+K03175+K02183+K05093+K02183+K02842+K00799+K06237+K08735+K07299+K07299+K04707+K08049+K04358+K04358+K06237
Cellular Processes	Cell growth and death	Necroptosis	10	71	0.864298	1	ko04217	Sfur000067(Parp);Sfur001656(FER1);Sfur001830(LUBEL);Sfur004759(MFSD12);Sfur005278(H2AZ2);Sfur010052(chmp2b);Sfur011206(--);Sfur012437(SMPD1);MSTRG.10604(dnm1l);MSTRG.31097(DNM1L)	K24070+K00522+K11974+K12197+K11251+K12192+K12800+K12350+K17065+K17065
Human Diseases	Neurodegenerative diseases	Amyotrophic lateral sclerosis (ALS)	5	39	0.868454	1	ko05014	Sfur003099(grin2b);Sfur003182(SOD1);Sfur005578(Gpx6);Sfur009994(cat);Sfur014606(--)	K05210+K04565+K00432+K03781+K02308
Organismal Systems	Environmental adaptation	Circadian entrainment	12	84	0.86943	1	ko04713	Sfur001358(Gycalpha99B);Sfur003099(grin2b);Sfur005723(TpnC41C);Sfur008504(Pka-C1);Sfur009743(RPS6KA5);Sfur009822(--);Sfur009965(Itpr);Sfur012073(CALML4);Sfur013596(TpnC41C);MSTRG.23839(ADCY9);MSTRG.38817(Itpr);MSTRG.4305(--)	K12318+K05210+K02183+K04345+K04445+K19477+K04958+K02183+K02183+K08049+K04958+K07376
Metabolism	Metabolism of other amino acids	Selenocompound metabolism	2	18	0.869496	1	ko00450	Sfur000372(CTH);Sfur012398(Scly)	K01758+K01763
Metabolism	Energy metabolism	Nitrogen metabolism	2	18	0.869496	1	ko00910	Sfur006538(Ca9);Sfur013045(bca-1)	K01672+K01673
Organismal Systems	Immune system	Hematopoietic cell lineage	2	18	0.869496	1	ko04640	Sfur012117(--);MSTRG.35605(ANPEP)	K11140+K11140
Organismal Systems	Excretory system	Collecting duct acid secretion	2	18	0.869496	1	ko04966	Sfur001004(atp6v0a1);Sfur013642(ATP6V0D1)	K02154+K02146
Organismal Systems	Endocrine system	Oxytocin signaling pathway	19	128	0.877966	1	ko04921	Sfur000902(Mlc1);Sfur000915(--);Sfur001358(Gycalpha99B);Sfur001371(MYLK);Sfur001869(Act5C);Sfur002202(Src64B);Sfur002767(Src64B);Sfur004029(ppp1cc-a);Sfur004157(ppp1cc-a);Sfur005723(TpnC41C);Sfur007641(--);Sfur007741(CAMKK1);Sfur008504(Pka-C1);Sfur009965(Itpr);Sfur012073(CALML4);Sfur012397(CAMK4);Sfur013596(TpnC41C);MSTRG.23839(ADCY9);MSTRG.38817(Itpr)	K12751+K04870+K12318+K00907+K05692+K05704+K05704+K06269+K06269+K02183+K07359+K07359+K04345+K04958+K02183+K05869+K02183+K08049+K04958
Organismal Systems	Endocrine system	Insulin secretion	12	85	0.879497	1	ko04911	Sfur001629(--);Sfur003329(--);Sfur003666(unc-64);Sfur003765(--);Sfur008383(cckar);Sfur008504(Pka-C1);Sfur010434(fgt-1);MSTRG.14814(SLC2A3);MSTRG.14815(SLC2A3);MSTRG.23839(ADCY9);MSTRG.37219(Creb3l4);MSTRG.37220(Creb3l4)	K04526+K04560+K04560+K07299+K04194+K04345+K07299+K07299+K07299+K08049+K09048+K09048
Environmental Information Processing	Signaling molecules and interaction	Neuroactive ligand-receptor interaction	27	177	0.883444	1	ko04080	Sfur001941(gbb-1);Sfur002376(GABBR2);Sfur003099(grin2b);Sfur003173(PTH1R);Sfur003228(PTH1R);Sfur003310(ggr-1);Sfur003786(PTH1R);Sfur004096(calcrl);Sfur005308(GNRHR2);Sfur005618(GNRHR);Sfur005801(--);Sfur006906(--);Sfur007675(Gpr161);Sfur008383(cckar);Sfur008864(SPR);Sfur009434(DERP3);Sfur009910(PRSS1);Sfur011124(Avpr1b);Sfur012186(thetaTry);Sfur012488(PK1-R);Sfur012563(Calcrl);Sfur013120(PK1-R);S…	K04615+K04615+K05210+K04585+K04585+K05195+K04585+K04577+K04280+K04280+K04280+K05204+K04145+K04194+K05052+K01312+K01312+K04226+K01312+K05052+K04577+K05052+K04609+K05770+K05052+K04307+K04240
Organismal Systems	Endocrine system	Progesterone-mediated oocyte maturation	10	73	0.885861	1	ko04914	Sfur000038(BUB1);Sfur001378(--);Sfur001474(Anapc4);Sfur001629(--);Sfur006020(ANAPC1);Sfur008504(Pka-C1);Sfur009036(plk1);Sfur012148(plk1);Sfur014612(Rps6ka2);MSTRG.23839(ADCY9)	K02178+K05459+K03351+K04526+K03348+K04345+K06631+K06631+K04373+K08049
Human Diseases	Substance dependence	Morphine addiction	10	73	0.885861	1	ko05032	Sfur001743(pde-5);Sfur001941(gbb-1);Sfur002376(GABBR2);Sfur003989(LHT2);Sfur008504(Pka-C1);Sfur010067(pde-5);Sfur010314(LHT1);Sfur010316(Pde7b);MSTRG.2001(Pde11);MSTRG.23839(ADCY9)	K18438+K04615+K04615+K15015+K04345+K18438+K15015+K13293+K13298+K08049
Organismal Systems	Endocrine system	Aldosterone synthesis and secretion	16	111	0.88931	1	ko04925	Sfur001001(SCARB1);Sfur003100(pes);Sfur003517(--);Sfur005723(TpnC41C);Sfur005842(pes);Sfur007895(SCARB2);Sfur008504(Pka-C1);Sfur009965(Itpr);Sfur012073(CALML4);Sfur012397(CAMK4);Sfur013596(TpnC41C);MSTRG.23839(ADCY9);MSTRG.37219(Creb3l4);MSTRG.37220(Creb3l4);MSTRG.38817(Itpr);MSTRG.8996(--)	K13885+K13885+K13885+K02183+K13885+K13885+K04345+K04958+K02183+K05869+K02183+K08049+K09048+K09048+K04958+K13885
Environmental Information Processing	Signal transduction	cGMP - PKG signaling pathway	22	148	0.891274	1	ko04022	Sfur001358(Gycalpha99B);Sfur001371(MYLK);Sfur001629(--);Sfur001961(--);Sfur002888(Slc8a1);Sfur004029(ppp1cc-a);Sfur004157(ppp1cc-a);Sfur004985(Cyp1);Sfur005323(Mef2);Sfur005723(TpnC41C);Sfur006427(InR);Sfur009374(CNGB1);Sfur009822(--);Sfur009965(Itpr);Sfur011902(Slc8a1);Sfur012073(CALML4);Sfur013596(TpnC41C);MSTRG.23839(ADCY9);MSTRG.37219(Creb3l4);MSTRG.37220(Creb3l4);MSTRG.38817(Itpr);MSTRG.4305…	K12318+K00907+K04526+K04952+K05849+K06269+K06269+K09565+K09260+K02183+K04527+K04952+K19477+K04958+K05849+K02183+K02183+K08049+K09048+K09048+K04958+K07376
Organismal Systems	Development	Dorso-ventral axis formation	5	41	0.895408	1	ko04320	Sfur001261(aop);Sfur001276(sqd);Sfur001462(aop);Sfur004042(br);Sfur006377(Dlish)	K03211+K03102+K03211+K02174+K04364
Human Diseases	Drug resistance	Endocrine resistance	9	68	0.899803	1	ko01522	Sfur001362(--);Sfur001378(--);Sfur002202(Src64B);Sfur002767(Src64B);Sfur003997(Ser);Sfur006252(--);Sfur006377(Dlish);Sfur008504(Pka-C1);MSTRG.23839(ADCY9)	K17447+K05459+K05704+K05704+K06052+K21635+K04364+K04345+K08049
Environmental Information Processing	Signal transduction	PI3K-Akt signaling pathway	27	180	0.902438	1	ko04151	Sfur000302(Hsp90b1);Sfur000392(Hsp90b1);Sfur000630(--);Sfur001378(--);Sfur001428(--);Sfur001629(--);Sfur001786(btl);Sfur005262(foxo);Sfur005415(CycE);Sfur006111(--);Sfur006377(Dlish);Sfur006427(InR);Sfur006971(Agrn);Sfur007115(LanB1);Sfur007922(TEK);Sfur008731(RXR);Sfur010462(LanB2);Sfur010699(At1g62600);Sfur012113(btl);Sfur012601(PIK3AP1);Sfur014231(chrb);Sfur015140(--);MSTRG.26165(--);MSTRG.261…	K09487+K09487+K06237+K05459+K05449+K04526+K05093+K09408+K06626+K06237+K04364+K04527+K06238+K05636+K05121+K08524+K05635+K05631+K05093+K12230+K08270+K06237+K04358+K04358+K06237+K09048+K09048
Cellular Processes	Cellular community - eukaryotes	Focal adhesion	22	150	0.904566	1	ko04510	Sfur000219(FLNA);Sfur000630(--);Sfur001362(--);Sfur001371(MYLK);Sfur001378(--);Sfur001428(--);Sfur001869(Act5C);Sfur002202(Src64B);Sfur002767(Src64B);Sfur003731(PXN);Sfur004029(ppp1cc-a);Sfur004157(ppp1cc-a);Sfur006111(--);Sfur006377(Dlish);Sfur006971(Agrn);Sfur007115(LanB1);Sfur010114(sqh);Sfur010462(LanB2);Sfur014933(CG3430);Sfur015140(--);Sfur015212(C3G);MSTRG.33770(--)	K04437+K06237+K17447+K00907+K05459+K05449+K05692+K05704+K05704+K05760+K06269+K06269+K06237+K04364+K06238+K05636+K12757+K05635+K05700+K06237+K06277+K06237
Human Diseases	Infectious diseases	Epithelial cell signaling in Helicobacter pylori infection	6	49	0.908478	1	ko05120	Sfur001004(atp6v0a1);Sfur002202(Src64B);Sfur002767(Src64B);Sfur008253(Ptpn11);Sfur009516(ATP6V0B);Sfur013642(ATP6V0D1)	K02154+K05704+K05704+K07293+K03661+K02146
Human Diseases	Cancers	Chronic myeloid leukemia	6	49	0.908478	1	ko05220	Sfur001362(--);Sfur004581(--);Sfur005342(--);Sfur006377(Dlish);Sfur008253(Ptpn11);MSTRG.22969(--)	K17447+K04402+K04402+K04364+K07293+K04707
Organismal Systems	Immune system	IL-17 signaling pathway	3	28	0.910452	1	ko04657	Sfur000302(Hsp90b1);Sfur000392(Hsp90b1);Sfur011999(--)	K09487+K09487+K03175
Cellular Processes	Cell motility	Regulation of actin cytoskeleton	23	158	0.915744	1	ko04810	Sfur000480(NPEPL1);Sfur001371(MYLK);Sfur001629(--);Sfur001786(btl);Sfur001869(Act5C);Sfur002202(Src64B);Sfur002555(arpc1a-b);Sfur002767(Src64B);Sfur003731(PXN);Sfur004029(ppp1cc-a);Sfur004157(ppp1cc-a);Sfur004373(Iqgap1);Sfur004862(brk1-b);Sfur007457(arpc4);Sfur008523(ARHGEF7);Sfur008871(arpc5-b);Sfur009446(chic);Sfur010114(sqh);Sfur012113(btl);Sfur013846(--);Sfur014933(CG3430);MSTRG.26165(--);MS…	K02085+K00907+K04526+K05093+K05692+K05704+K05757+K05704+K05760+K06269+K06269+K16848+K05752+K05755+K13710+K05754+K05759+K12757+K05093+K23612+K05700+K04358+K04358
Organismal Systems	Digestive system	Carbohydrate digestion and absorption	3	29	0.922406	1	ko04973	Sfur002233(HK1);MSTRG.25617(Hex-t2);MSTRG.3014(Hex-t2)	K00844+K00844+K00844
Human Diseases	Substance dependence	Nicotine addiction	3	29	0.922406	1	ko05033	Sfur003099(grin2b);Sfur003989(LHT2);Sfur010314(LHT1)	K05210+K15015+K15015
Human Diseases	Cancers	MicroRNAs in cancer	17	122	0.922474	1	ko05206	Sfur000480(NPEPL1);Sfur003040(Kif23);Sfur005293(sem-2);Sfur005415(CycE);Sfur005496(HNRNPK);Sfur006377(Dlish);Sfur007797(BMPR2);Sfur009313(DNMT);Sfur009743(RPS6KA5);Sfur009985(abcG23);Sfur010215(abcG23);Sfur010345(abcG23);Sfur010548(abcG23);Sfur010905(abcG23);Sfur011914(ABCC1);Sfur012519(abcG23);Sfur014231(chrb)	K02085+K17387+K23581+K06626+K12886+K04364+K04671+K00558+K04445+K05665+K05665+K05665+K05665+K05665+K05665+K05665+K08270
Human Diseases	Infectious diseases	Hepatitis C	9	71	0.924842	1	ko05160	Sfur001001(SCARB1);Sfur003100(pes);Sfur003517(--);Sfur005842(pes);Sfur006377(Dlish);Sfur007895(SCARB2);Sfur008731(RXR);Sfur011999(--);MSTRG.8996(--)	K13885+K13885+K13885+K13885+K04364+K13885+K08524+K03175+K13885
Cellular Processes	Cell growth and death	Cellular senescence	15	110	0.926146	1	ko04218	Sfur004029(ppp1cc-a);Sfur004157(ppp1cc-a);Sfur004581(--);Sfur005262(foxo);Sfur005342(--);Sfur005415(CycE);Sfur005723(TpnC41C);Sfur006074(Tis11);Sfur009965(Itpr);Sfur012073(CALML4);Sfur012510(Mre11);Sfur013596(TpnC41C);Sfur013892(rad50);MSTRG.38817(Itpr);MSTRG.4153(RAD50)	K06269+K06269+K04402+K09408+K04402+K06626+K02183+K18753+K04958+K02183+K10865+K02183+K10866+K04958+K10866
Organismal Systems	Immune system	Fc gamma R-mediated phagocytosis	5	44	0.926847	1	ko04666	Sfur002555(arpc1a-b);Sfur004571(--);Sfur007457(arpc4);Sfur008871(arpc5-b);MSTRG.17006(PLPP1)	K05757+K01080+K05755+K05754+K01080
Human Diseases	Cancers	Colorectal cancer	6	51	0.926918	1	ko05210	Sfur000480(NPEPL1);Sfur004581(--);Sfur005342(--);Sfur006377(Dlish);Sfur009752(BIRC6);Sfur015216(MSH2)	K02085+K04402+K04402+K04364+K08731+K08735
Metabolism	Carbohydrate metabolism	Propanoate metabolism	4	37	0.928454	1	ko00640	Sfur007714(ACAC);Sfur009796(cpnA);Sfur014797(Dbt);MSTRG.29894(ECHS1)	K11262+K14729+K09699+K07511
Organismal Systems	Endocrine system	Thyroid hormone signaling pathway	17	124	0.93355	1	ko04919	Sfur000032(kto);Sfur001806(Slc16a10);Sfur001869(Act5C);Sfur002202(Src64B);Sfur002767(Src64B);Sfur003765(--);Sfur008504(Pka-C1);Sfur008731(RXR);Sfur010434(fgt-1);Sfur013971(MED4);Sfur014170(MED24);Sfur014796(slc16a10);MSTRG.14814(SLC2A3);MSTRG.14815(SLC2A3);MSTRG.39804(--);MSTRG.39806(--);MSTRG.976(--)	K15162+K08187+K05692+K05704+K05704+K07299+K04345+K08524+K07299+K15146+K15167+K08187+K07299+K07299+K11644+K11644+K17902
Genetic Information Processing	Translation	RNA transport	39	259	0.934176	1	ko03013	Sfur000141(--);Sfur000246(--);Sfur000349(to);Sfur000352(--);Sfur000387(anon-3B1.2);Sfur000393(to);Sfur000549(STRAP);Sfur000901(--);Sfur001536(Thoc2);Sfur002933(Mtor);Sfur003749(rnps1-b);Sfur003977(to);Sfur004313(--);Sfur004764(RANGAP1);Sfur004790(Gp210);Sfur004981(--);Sfur005166(--);Sfur005717(thoc6);Sfur006366(--);Sfur006845(Cbp80);Sfur007299(--);Sfur008782(Nup37);Sfur009063(Eif4g2);Sfur009085(N…	K07936+K07936+K07936+K07936+K07936+K07936+K13137+K07936+K12879+K09291+K14325+K07936+K14530+K14319+K14314+K14288+K14288+K13175+K14288+K12882+K07936+K14302+K03260+K14295+K05019+K12160+K14288+K03540+K15516+K14321+K14288+K14288+K14311+K13176+K14305+K14310+K14310+K14297+K14315
Human Diseases	Infectious diseases	Epstein-Barr virus infection	16	118	0.935309	1	ko05169	Sfur000419(Calr);Sfur001115(Psmd12);Sfur001151(PDIA3);Sfur001192(Dox-A2);Sfur004581(--);Sfur005342(--);Sfur005415(CycE);Sfur005969(PSMC4);Sfur011510(Rpt2);Sfur011611(pol);Sfur011797(psmc3-a);Sfur011999(--);Sfur012816(PSMD2);Sfur013245(PSMD14);MSTRG.39804(--);MSTRG.39806(--)	K08057+K03035+K08056+K03033+K04402+K04402+K06626+K03063+K03062+K06065+K03065+K03175+K03028+K03030+K11644+K11644
Cellular Processes	Cellular community - eukaryotes	Signaling pathways regulating pluripotency of stem cells	11	86	0.93677	1	ko04550	Sfur000480(NPEPL1);Sfur001378(--);Sfur001786(btl);Sfur001985(fz2);Sfur002398(ZFHX4);Sfur004090(egg);Sfur006377(Dlish);Sfur007797(BMPR2);Sfur012113(btl);Sfur013467(Rif1);Sfur014187(fzd10-a)	K02085+K05459+K05093+K02375+K09378+K11421+K04364+K04671+K05093+K11138+K02842
Environmental Information Processing	Signal transduction	Rap1 signaling pathway	21	150	0.937791	1	ko04015	Sfur001378(--);Sfur001428(--);Sfur001629(--);Sfur001786(btl);Sfur001869(Act5C);Sfur002202(Src64B);Sfur002767(Src64B);Sfur003099(grin2b);Sfur005723(TpnC41C);Sfur006427(InR);Sfur007675(Gpr161);Sfur007922(TEK);Sfur009446(chic);Sfur010699(At1g62600);Sfur012073(CALML4);Sfur012113(btl);Sfur013596(TpnC41C);Sfur015212(C3G);MSTRG.23839(ADCY9);MSTRG.26165(--);MSTRG.26166(--)	K05459+K05449+K04526+K05093+K05692+K05704+K05704+K05210+K02183+K04527+K04145+K05121+K05759+K05631+K02183+K05093+K02183+K06277+K08049+K04358+K04358
Organismal Systems	Immune system	Natural killer cell mediated cytotoxicity	3	31	0.94204	1	ko04650	Sfur001362(--);Sfur006377(Dlish);Sfur008253(Ptpn11)	K17447+K04364+K07293
Human Diseases	Infectious diseases	Shigellosis	29	201	0.943879	1	ko05131	Sfur000079(RRAGA);Sfur001830(LUBEL);Sfur001869(Act5C);Sfur002202(Src64B);Sfur002233(HK1);Sfur002555(arpc1a-b);Sfur002767(Src64B);Sfur003664(Pex23);Sfur003731(PXN);Sfur005262(foxo);Sfur007457(arpc4);Sfur008871(arpc5-b);Sfur009446(chic);Sfur009743(RPS6KA5);Sfur009889(Sep2);Sfur009965(Itpr);Sfur010114(sqh);Sfur010962(--);Sfur011206(--);Sfur011999(--);Sfur013517(ATG16L1);Sfur013846(--);Sfur014293(--)…	K16185+K11974+K05692+K05704+K00844+K05757+K05704+K17988+K05760+K09408+K05755+K05754+K05759+K04445+K16939+K04958+K12757+K00914+K12800+K03175+K17890+K23612+K00914+K00914+K05700+K15464+K00844+K00844+K04958
Organismal Systems	Endocrine system	Melanogenesis	9	74	0.944301	1	ko04916	Sfur001985(fz2);Sfur005723(TpnC41C);Sfur008504(Pka-C1);Sfur012073(CALML4);Sfur013596(TpnC41C);Sfur014187(fzd10-a);MSTRG.23839(ADCY9);MSTRG.37219(Creb3l4);MSTRG.37220(Creb3l4)	K02375+K02183+K04345+K02183+K02183+K02842+K08049+K09048+K09048
Environmental Information Processing	Signal transduction	ErbB signaling pathway	5	47	0.949586	1	ko04012	Sfur001362(--);Sfur002202(Src64B);Sfur002767(Src64B);Sfur006377(Dlish);MSTRG.22969(--)	K17447+K05704+K05704+K04364+K04707
Organismal Systems	Sensory system	Phototransduction - fly	10	82	0.950966	1	ko04745	Sfur001869(Act5C);Sfur002550(--);Sfur004335(MYO3A);Sfur005723(TpnC41C);Sfur009201(--);Sfur009965(Itpr);Sfur011060(--);Sfur012073(CALML4);Sfur013596(TpnC41C);MSTRG.38817(Itpr)	K05692+K08834+K08834+K02183+K08834+K04958+K08834+K02183+K02183+K04958
Genetic Information Processing	Folding, sorting and degradation	Sulfur relay system	1	15	0.952538	1	ko04122	Sfur007863(--)	K11996
Human Diseases	Endocrine and metabolic diseases	Maturity onset diabetes of the young	1	15	0.952538	1	ko04950	Sfur001629(--)	K04526
Human Diseases	Infectious diseases	Tuberculosis	14	109	0.953349	1	ko05152	Sfur001004(atp6v0a1);Sfur001911(COLEC12);Sfur002202(Src64B);Sfur002767(Src64B);Sfur005723(TpnC41C);Sfur009516(ATP6V0B);Sfur010962(--);Sfur011999(--);Sfur012073(CALML4);Sfur012217(TLR6);Sfur013596(TpnC41C);Sfur013642(ATP6V0D1);Sfur014293(--);Sfur014647(--)	K02154+K10059+K05704+K05704+K02183+K03661+K00914+K03175+K02183+K05398+K02183+K02146+K00914+K00914
Cellular Processes	Transport and catabolism	Endocytosis	25	179	0.953392	1	ko04144	Sfur000033(FAM43A);Sfur001786(btl);Sfur001906(ARFGEF1);Sfur002202(Src64B);Sfur002555(arpc1a-b);Sfur002604(CCDC97);Sfur002767(Src64B);Sfur004248(AP2M1);Sfur004759(MFSD12);Sfur007457(arpc4);Sfur007825(RAB11FIP5);Sfur007936(Smap1);Sfur008158(PGBD1);Sfur008871(arpc5-b);Sfur010052(chmp2b);Sfur011999(--);Sfur012113(btl);Sfur012938(Ldlrap1);Sfur012967(--);Sfur013846(--);MSTRG.22969(--);MSTRG.32397(Hspa2…	K12474+K05093+K18442+K05704+K05757+K18468+K05704+K11826+K12197+K05755+K12484+K12486+K18464+K05754+K12192+K03175+K05093+K12474+K12483+K23612+K04707+K03283+K12483+K03283+K03283
Organismal Systems	Endocrine system	Renin secretion	9	76	0.954675	1	ko04924	Sfur001358(Gycalpha99B);Sfur005723(TpnC41C);Sfur007067(TINAGL1);Sfur008504(Pka-C1);Sfur009822(--);Sfur009965(Itpr);Sfur012073(CALML4);Sfur013596(TpnC41C);MSTRG.38817(Itpr)	K12318+K02183+K01363+K04345+K19477+K04958+K02183+K02183+K04958
Cellular Processes	Cell growth and death	Ferroptosis	4	41	0.95831	1	ko04216	Sfur001656(FER1);Sfur002024(SAT2);Sfur012982(Acsl1);Sfur013958(Mvl)	K00522+K00657+K01897+K21398
Human Diseases	Infectious diseases	Influenza A	9	77	0.959187	1	ko05164	Sfur001869(Act5C);Sfur004410(FDPS);Sfur004612(pabpn1-a);Sfur009434(DERP3);Sfur009910(PRSS1);Sfur011206(--);Sfur012186(thetaTry);Sfur013085(--);MSTRG.33278(--)	K05692+K00787+K14396+K01312+K01312+K12800+K01312+K15042+K14297
Genetic Information Processing	Translation	Ribosome biogenesis in eukaryotes	15	118	0.962468	1	ko03008	Sfur000141(--);Sfur000246(--);Sfur000349(to);Sfur000352(--);Sfur000387(anon-3B1.2);Sfur000393(to);Sfur000901(--);Sfur002353(FCF1);Sfur003977(to);Sfur004313(--);Sfur007299(--);Sfur009946(BMS1);Sfur010810(Nhlrc2);Sfur011120(--);Sfur014165(--)	K07936+K07936+K07936+K07936+K07936+K07936+K07936+K14566+K07936+K14530+K07936+K14569+K14539+K14546+K14561
Environmental Information Processing	Signal transduction	Phospholipase D signaling pathway	10	85	0.963807	1	ko04072	Sfur001362(--);Sfur001629(--);Sfur004571(--);Sfur006377(Dlish);Sfur006427(InR);Sfur008253(Ptpn11);Sfur011124(Avpr1b);Sfur013430(--);MSTRG.17006(PLPP1);MSTRG.23839(ADCY9)	K17447+K04526+K01080+K04364+K04527+K07293+K04226+K04609+K01080+K08049
Human Diseases	Infectious diseases	Human cytomegalovirus infection	15	119	0.965661	1	ko05163	Sfur000419(Calr);Sfur001151(PDIA3);Sfur002202(Src64B);Sfur002767(Src64B);Sfur003731(PXN);Sfur005723(TpnC41C);Sfur006377(Dlish);Sfur008504(Pka-C1);Sfur009965(Itpr);Sfur012073(CALML4);Sfur013596(TpnC41C);MSTRG.23839(ADCY9);MSTRG.37219(Creb3l4);MSTRG.37220(Creb3l4);MSTRG.38817(Itpr)	K08057+K08056+K05704+K05704+K05760+K02183+K04364+K04345+K04958+K02183+K02183+K08049+K09048+K09048+K04958
Environmental Information Processing	Signal transduction	Apelin signaling pathway	16	126	0.966967	1	ko04371	Sfur001371(MYLK);Sfur002888(Slc8a1);Sfur003997(Ser);Sfur005323(Mef2);Sfur005723(TpnC41C);Sfur008504(Pka-C1);Sfur009965(Itpr);Sfur010962(--);Sfur011902(Slc8a1);Sfur012073(CALML4);Sfur012397(CAMK4);Sfur013596(TpnC41C);Sfur014293(--);Sfur014647(--);MSTRG.23839(ADCY9);MSTRG.38817(Itpr)	K00907+K05849+K06052+K09260+K02183+K04345+K04958+K00914+K05849+K02183+K05869+K02183+K00914+K00914+K08049+K04958
Environmental Information Processing	Signaling molecules and interaction	Cytokine-cytokine receptor interaction	3	35	0.96825	1	ko04060	Sfur005125(--);Sfur007797(BMPR2);Sfur012981(--)	K22628+K04671+K22679
Human Diseases	Cancers	Viral carcinogenesis	17	133	0.968274	1	ko05203	Sfur000483(PKLR);Sfur002202(Src64B);Sfur002767(Src64B);Sfur003731(PXN);Sfur003860(dnaJ);Sfur005415(CycE);Sfur005496(HNRNPK);Sfur006377(Dlish);Sfur007941(Sb);Sfur008504(Pka-C1);Sfur008511(PyK);Sfur009998(SND1);Sfur011510(Rpt2);Sfur013642(ATP6V0D1);MSTRG.28015(dl);MSTRG.37219(Creb3l4);MSTRG.37220(Creb3l4)	K00873+K05704+K05704+K05760+K09504+K06626+K12886+K04364+K08665+K04345+K00873+K15979+K03062+K02146+K09254+K09048+K09048
Organismal Systems	Immune system	Leukocyte transendothelial migration	5	51	0.969933	1	ko04670	Sfur001869(Act5C);Sfur003731(PXN);Sfur008253(Ptpn11);Sfur010114(sqh);Sfur014933(CG3430)	K05692+K05760+K07293+K12757+K05700
Organismal Systems	Nervous system	Glutamatergic synapse	9	80	0.970412	1	ko04724	Sfur003099(grin2b);Sfur006906(--);Sfur008504(Pka-C1);Sfur009250(SHANK3);Sfur009577(Shank3);Sfur009965(Itpr);Sfur013430(--);MSTRG.23839(ADCY9);MSTRG.38817(Itpr)	K05210+K05204+K04345+K15009+K15009+K04958+K04609+K08049+K04958
Organismal Systems	Nervous system	GABAergic synapse	8	73	0.970508	1	ko04727	Sfur001941(gbb-1);Sfur002202(Src64B);Sfur002376(GABBR2);Sfur002767(Src64B);Sfur003989(LHT2);Sfur008504(Pka-C1);Sfur010314(LHT1);MSTRG.23839(ADCY9)	K04615+K05704+K04615+K05704+K15015+K04345+K15015+K08049
Organismal Systems	Digestive system	Salivary secretion	11	94	0.97101	1	ko04970	Sfur001358(Gycalpha99B);Sfur005723(TpnC41C);Sfur006653(IFRD2);Sfur008504(Pka-C1);Sfur009822(--);Sfur009965(Itpr);Sfur012073(CALML4);Sfur013596(TpnC41C);MSTRG.23839(ADCY9);MSTRG.38817(Itpr);MSTRG.4305(--)	K12318+K02183+K13855+K04345+K19477+K04958+K02183+K02183+K08049+K04958+K07376
Organismal Systems	Sensory system	Taste transduction	3	36	0.972778	1	ko04742	Sfur001941(gbb-1);Sfur002376(GABBR2);Sfur008504(Pka-C1)	K04615+K04615+K04345
Human Diseases	Cancers	Transcriptional misregulation in cancers	19	148	0.973188	1	ko05202	Sfur001261(aop);Sfur001378(--);Sfur001462(aop);Sfur001932(cdk14);Sfur002437(cdk9);Sfur002828(HPGD);Sfur003607(caz);Sfur004581(--);Sfur005342(--);Sfur008731(RXR);Sfur009576(SS18L1);Sfur012122(stac);Sfur013364(NSD2);Sfur014336(ADH2);MSTRG.27175(DDX5);MSTRG.28015(dl);MSTRG.36487(Prom2);MSTRG.39804(--);MSTRG.39806(--)	K03211+K05459+K03211+K08821+K02211+K00069+K13098+K04402+K04402+K08524+K15623+K15621+K11424+K00069+K12823+K09254+K06532+K11644+K11644
Human Diseases	Infectious diseases	Leishmaniasis	1	18	0.974225	1	ko05140	Sfur011999(--)	K03175
Organismal Systems	Immune system	NOD-like receptor signaling pathway	10	89	0.976227	1	ko04621	Sfur001830(LUBEL);Sfur006606(arrd-17);Sfur007067(TINAGL1);Sfur009965(Itpr);Sfur011206(--);Sfur011999(--);Sfur013517(ATG16L1);MSTRG.10604(dnm1l);MSTRG.31097(DNM1L);MSTRG.38817(Itpr)	K11974+K20910+K01363+K04958+K12800+K03175+K17890+K17065+K17065+K04958
Human Diseases	Cancer: overview	PD-L1 expression and PD-1 checkpoint pathway in cancer	3	37	0.976688	1	ko05235	Sfur008253(Ptpn11);Sfur008719(Alk);Sfur011999(--)	K07293+K05119+K03175
Genetic Information Processing	Replication and repair	Nucleotide excision repair	20	157	0.978269	1	ko03420	Sfur000741(Mes4);Sfur001038(--);Sfur001774(--);Sfur003256(Rfc5);Sfur003370(lig1);Sfur004970(--);Sfur005462(RpA-70);Sfur005880(PCNA);Sfur008184(DNApol-delta);Sfur009691(DNApol-delta);Sfur010285(POLE3);Sfur011216(Pole);Sfur011241(--);Sfur011757(--);Sfur011884(RFC4);Sfur011933(POLE2);Sfur012120(--);Sfur012465(AAEL007634);Sfur012767(--);Sfur013322(Myg1)	K03506+K10848+K10848+K10756+K10747+K10848+K07466+K04802+K02327+K02327+K02326+K02324+K10848+K10848+K10755+K02325+K10848+K10847+K10848+K10754
Metabolism	Glycan biosynthesis and metabolism	Glycosaminoglycan biosynthesis - heparan sulfate / heparin	1	19	0.978972	1	ko00534	Sfur000272(hs6st1b)	K02514
Human Diseases	Infectious diseases	Measles	5	54	0.979872	1	ko05162	Sfur005415(CycE);Sfur011999(--);MSTRG.32397(Hspa2);MSTRG.4355(HSP70B2);MSTRG.4356(HSP70B2)	K06626+K03175+K03283+K03283+K03283
Cellular Processes	Transport and catabolism	Autophagy - animal	26	198	0.981874	1	ko04140	Sfur000079(RRAGA);Sfur001629(--);Sfur005841(RB1CC1);Sfur005885(cfaD);Sfur007067(TINAGL1);Sfur007641(--);Sfur007741(CAMKK1);Sfur008091(RB1CC1);Sfur008504(Pka-C1);Sfur009189(ATG9A);Sfur009500(--);Sfur009965(Itpr);Sfur010881(--);Sfur010962(--);Sfur011999(--);Sfur012081(ATG2B);Sfur013517(ATG16L1);Sfur014231(chrb);Sfur014293(--);Sfur014647(--);Sfur014756(Cp1);Sfur014816(Cp1);Sfur014836(Cp1);MSTRG.2043…	K16185+K04526+K17589+K01365+K01363+K07359+K07359+K17589+K04345+K17907+K17907+K04958+K08491+K00914+K03175+K17906+K17890+K08270+K00914+K00914+K01365+K01365+K01365+K17888+K15464+K04958
Environmental Information Processing	Signal transduction	Hippo signaling pathway	12	106	0.982873	1	ko04390	Sfur000480(NPEPL1);Sfur000982(l(2)gl);Sfur001869(Act5C);Sfur001985(fz2);Sfur004029(ppp1cc-a);Sfur004157(ppp1cc-a);Sfur007797(BMPR2);Sfur009752(BIRC6);Sfur009753(--);Sfur013563(POL);Sfur013940(yap1);Sfur014187(fzd10-a)	K02085+K06094+K05692+K02375+K06269+K06269+K04671+K08731+K05706+K16681+K16687+K02842
Human Diseases	Infectious disease: bacterial	Yersinia infection	9	85	0.983066	1	ko05135	Sfur001869(Act5C);Sfur002202(Src64B);Sfur002767(Src64B);Sfur003731(PXN);Sfur008523(ARHGEF7);Sfur011206(--);Sfur011999(--);Sfur013846(--);Sfur014612(Rps6ka2)	K05692+K05704+K05704+K05760+K13710+K12800+K03175+K23612+K04373
Environmental Information Processing	Signal transduction	MAPK signaling pathway - fly	19	154	0.984047	1	ko04013	Sfur000195(RASA3);Sfur000243(Tbl1x);Sfur001261(aop);Sfur001295(tsl);Sfur001462(aop);Sfur002202(Src64B);Sfur002767(Src64B);Sfur005323(Mef2);Sfur006377(Dlish);Sfur007876(bab1);Sfur008253(Ptpn11);Sfur009446(chic);Sfur010969(--);Sfur011162(--);Sfur011873(kay);Sfur011934(bab2);Sfur011999(--);Sfur015260(Dusp10);MSTRG.34922(DUSP10)	K12380+K04508+K03211+K12377+K03211+K05704+K05704+K09260+K04364+K09237+K07293+K05759+K20230+K04506+K09031+K09237+K03175+K20216+K20216
Human Diseases	Cancers	Renal cell carcinoma	7	71	0.984205	1	ko05211	Sfur003765(--);Sfur006377(Dlish);Sfur008253(Ptpn11);Sfur010434(fgt-1);Sfur015212(C3G);MSTRG.14814(SLC2A3);MSTRG.14815(SLC2A3)	K07299+K04364+K07293+K07299+K06277+K07299+K07299
Organismal Systems	Endocrine system	Growth hormone synthesis, secretion and action	9	86	0.984901	1	ko04935	Sfur001362(--);Sfur001378(--);Sfur006377(Dlish);Sfur008504(Pka-C1);Sfur009965(Itpr);MSTRG.23839(ADCY9);MSTRG.37219(Creb3l4);MSTRG.37220(Creb3l4);MSTRG.38817(Itpr)	K17447+K05459+K04364+K04345+K04958+K08049+K09048+K09048+K04958
Environmental Information Processing	Signal transduction	TGF-beta signaling pathway	6	64	0.985236	1	ko04350	Sfur002960(--);Sfur007797(BMPR2);Sfur013369(MAG);MSTRG.15047(--);MSTRG.15050(sog);MSTRG.15131(BAMBI)	K04658+K04671+K06766+K04657+K04657+K10162
Human Diseases	Cardiovascular diseases	Viral myocarditis	2	31	0.985393	1	ko05416	Sfur001869(Act5C);Sfur009063(Eif4g2)	K05692+K03260
Genetic Information Processing	Transcription	Basal transcription factors	3	41	0.987605	1	ko03022	Sfur003528(Taf2);Sfur005078(TAF13);Sfur010293(TfIIFalpha)	K03128+K03127+K03138
Organismal Systems	Immune system	Th1 and Th2 cell differentiation	2	32	0.98775	1	ko04658	Sfur003997(Ser);Sfur006252(--)	K06052+K21635
Organismal Systems	Nervous system	Serotonergic synapse	6	66	0.988662	1	ko04726	Sfur000422(SLC18B1);Sfur008504(Pka-C1);Sfur009057(AAEL010734);Sfur009965(Itpr);Sfur014303(SLC18A2);MSTRG.38817(Itpr)	K08155+K04345+K01593+K04958+K08155+K04958
Organismal Systems	Development	Osteoclast differentiation	3	42	0.989443	1	ko04380	Sfur006377(Dlish);Sfur011999(--);Sfur012397(CAMK4)	K04364+K03175+K05869
Organismal Systems	Nervous system	Cholinergic synapse	8	82	0.989828	1	ko04725	Sfur004872(ChT);Sfur008504(Pka-C1);Sfur009965(Itpr);Sfur012397(CAMK4);MSTRG.23839(ADCY9);MSTRG.37219(Creb3l4);MSTRG.37220(Creb3l4);MSTRG.38817(Itpr)	K14387+K04345+K04958+K05869+K08049+K09048+K09048+K04958
Organismal Systems	Circulatory system	Adrenergic signaling in cardiomyocytes	13	118	0.989885	1	ko04261	Sfur000915(--);Sfur002888(Slc8a1);Sfur004029(ppp1cc-a);Sfur004157(ppp1cc-a);Sfur005723(TpnC41C);Sfur008504(Pka-C1);Sfur009743(RPS6KA5);Sfur011902(Slc8a1);Sfur012073(CALML4);Sfur013596(TpnC41C);MSTRG.23839(ADCY9);MSTRG.37219(Creb3l4);MSTRG.37220(Creb3l4)	K04870+K05849+K06269+K06269+K02183+K04345+K04445+K05849+K02183+K02183+K08049+K09048+K09048
Organismal Systems	Development and regeneration	Axon regeneration	12	111	0.989913	1	ko04361	Sfur000934(--);Sfur002793(ROBO2);Sfur005262(foxo);Sfur006427(InR);Sfur008504(Pka-C1);Sfur009057(AAEL010734);Sfur010613(Map3k13);Sfur011873(kay);Sfur012505(sqz);Sfur015015(--);Sfur015335(--);MSTRG.23839(ADCY9)	K23480+K06754+K09408+K04527+K04345+K01593+K04422+K09031+K23480+K23489+K23489+K08049
Environmental Information Processing	Signal transduction	Hippo signaling pathway -fly	11	104	0.990022	1	ko04391	Sfur000982(l(2)gl);Sfur001869(Act5C);Sfur001926(hum-6);Sfur002336(ft);Sfur002901(ft);Sfur003094(ft);Sfur005415(CycE);Sfur007170(fj);Sfur012755(Cad89D);Sfur013563(POL);Sfur013940(yap1)	K06094+K05692+K16677+K16669+K16669+K16669+K06626+K16674+K16669+K16681+K16687
Metabolism	Global and overview maps	Carbon metabolism	32	245	0.99066	1	ko01200	Sfur000157(HAO1);Sfur000483(PKLR);Sfur000898(T05H10.6);Sfur002041(Pgi);Sfur002180(GPT);Sfur002233(HK1);Sfur002616(gpt2l);Sfur002786(MDH2);Sfur004874(PSPH);Sfur005488(PGK1);Sfur006735(pgk-1);Sfur007076(pdhb-1);Sfur007376(tdcB);Sfur008187(GAPDH);Sfur008511(PyK);Sfur009796(cpnA);Sfur009918(--);Sfur009994(cat);Sfur011418(Aco1);Sfur012700(Idh1);Sfur012802(rgn);Sfur013438(Pfk);Sfur013726(IDH1);Sfur0138…	K11517+K00873+K00161+K01810+K00814+K00844+K00814+K00026+K01079+K00927+K00927+K00162+K01754+K00134+K00873+K14729+K00234+K03781+K01681+K00031+K01053+K00850+K00030+K00026+K00863+K01623+K00863+K01053+K01623+K00844+K07511+K00844
Organismal Systems	Immune system	Toll-like receptor signaling pathway	2	35	0.992809	1	ko04620	Sfur011999(--);Sfur012217(TLR6)	K03175+K05398
Organismal Systems	Immune system	B cell receptor signaling pathway	2	35	0.992809	1	ko04662	Sfur006377(Dlish);Sfur012601(PIK3AP1)	K04364+K12230
Organismal Systems	Immune system	Chemokine signaling pathway	8	85	0.992993	1	ko04062	Sfur001362(--);Sfur002202(Src64B);Sfur002767(Src64B);Sfur003731(PXN);Sfur005262(foxo);Sfur006377(Dlish);Sfur008504(Pka-C1);MSTRG.23839(ADCY9)	K17447+K05704+K05704+K05760+K09408+K04364+K04345+K08049
Cellular Processes	Transport and catabolism	Mitophagy - animal	6	70	0.993393	1	ko04137	Sfur002202(Src64B);Sfur002767(Src64B);Sfur005262(foxo);Sfur009189(ATG9A);Sfur009500(--);MSTRG.24264(BNIP3)	K05704+K05704+K09408+K17907+K17907+K15464
Organismal Systems	Endocrine system	GnRH secretion	4	55	0.994641	1	ko04929	Sfur001941(gbb-1);Sfur002376(GABBR2);Sfur009965(Itpr);MSTRG.38817(Itpr)	K04615+K04615+K04958+K04958
Organismal Systems	Development	Axon guidance	13	127	0.9962	1	ko04360	Sfur002202(Src64B);Sfur002767(Src64B);Sfur002793(ROBO2);Sfur004876(ptc);Sfur006745(SEMA-2A);Sfur007797(BMPR2);Sfur008253(Ptpn11);Sfur010114(sqh);Sfur010544(zig-4);Sfur011590(XPNPEP1);Sfur013145(dnt);Sfur013177(ApepP);Sfur013369(MAG)	K05704+K05704+K06754+K06225+K06842+K04671+K07293+K12757+K06753+K06841+K05128+K06841+K06766
Environmental Information Processing	Signal transduction	Notch signaling pathway	5	66	0.996332	1	ko04330	Sfur003598(dx);Sfur003997(Ser);Sfur005509(Nct);Sfur006252(--);Sfur011611(pol)	K06058+K06052+K06171+K21635+K06065
Human Diseases	Cancers	Pancreatic cancer	2	39	0.996498	1	ko05212	Sfur004581(--);Sfur005342(--)	K04402+K04402
Organismal Systems	Circulatory system	Cardiac muscle contraction	5	67	0.996836	1	ko04260	Sfur000915(--);Sfur002888(Slc8a1);Sfur011902(Slc8a1);Sfur013176(Cox6a1);Sfur014287(COX4I2)	K04870+K05849+K05849+K02266+K02263
Human Diseases	Infectious diseases	Kaposi sarcoma-associated herpesvirus infection	10	107	0.99703	1	ko05167	Sfur002202(Src64B);Sfur002767(Src64B);Sfur005723(TpnC41C);Sfur009965(Itpr);Sfur010962(--);Sfur012073(CALML4);Sfur013596(TpnC41C);Sfur014293(--);Sfur014647(--);MSTRG.38817(Itpr)	K05704+K05704+K02183+K04958+K00914+K02183+K02183+K00914+K00914+K04958
Human Diseases	Infectious disease: viral	Human immunodeficiency virus 1 infection	10	108	0.997375	1	ko05170	Sfur000419(Calr);Sfur001151(PDIA3);Sfur003371(APPBP2);Sfur003731(PXN);Sfur005723(TpnC41C);Sfur009965(Itpr);Sfur011999(--);Sfur012073(CALML4);Sfur013596(TpnC41C);MSTRG.38817(Itpr)	K08057+K08056+K11789+K05760+K02183+K04958+K03175+K02183+K02183+K04958
Organismal Systems	Immune system	Th17 cell differentiation	1	30	0.997765	1	ko04659	Sfur008731(RXR)	K08524
Human Diseases	Cardiovascular diseases	Dilated cardiomyopathy (DCM)	11	117	0.997807	1	ko05414	Sfur000915(--);Sfur001378(--);Sfur001869(Act5C);Sfur002888(Slc8a1);Sfur008504(Pka-C1);Sfur010572(ttn-1);Sfur011902(Slc8a1);MSTRG.23839(ADCY9);MSTRG.32159(Mylk);MSTRG.32164(CCDC141);MSTRG.32167(--)	K04870+K05459+K05692+K05849+K04345+K12567+K05849+K08049+K12567+K12567+K12567
Human Diseases	Neurodegenerative disease	Spinocerebellar ataxia	11	118	0.998059	1	ko05017	Sfur002300(nas-14);Sfur003099(grin2b);Sfur005461(Ldlr);Sfur005841(RB1CC1);Sfur008091(RB1CC1);Sfur009965(Itpr);Sfur010962(--);Sfur012081(ATG2B);Sfur014293(--);Sfur014647(--);MSTRG.38817(Itpr)	K19323+K05210+K20053+K17589+K17589+K04958+K00914+K17906+K00914+K00914+K04958
Human Diseases	Cancers	Acute myeloid leukemia	1	31	0.998178	1	ko05221	Sfur006377(Dlish)	K04364
Human Diseases	Infectious diseases	Human papillomavirus infection	26	225	0.998233	1	ko05165	Sfur000480(NPEPL1);Sfur000483(PKLR);Sfur000630(--);Sfur000982(l(2)gl);Sfur001004(atp6v0a1);Sfur001985(fz2);Sfur003185(hgh1);Sfur003731(PXN);Sfur003997(Ser);Sfur005415(CycE);Sfur006111(--);Sfur006377(Dlish);Sfur006971(Agrn);Sfur007115(LanB1);Sfur008504(Pka-C1);Sfur008511(PyK);Sfur009516(ATP6V0B);Sfur010462(LanB2);Sfur010699(At1g62600);Sfur011510(Rpt2);Sfur013642(ATP6V0D1);Sfur014187(fzd10-a);Sfur0…	K02085+K00873+K06237+K06094+K02154+K02375+K12236+K05760+K06052+K06626+K06237+K04364+K06238+K05636+K04345+K00873+K03661+K05635+K05631+K03062+K02146+K02842+K06237+K06237+K09048+K09048
Cellular Processes	Transport and catabolism	Autophagy - other eukaryotes	8	96	0.998327	1	ko04136	Sfur009189(ATG9A);Sfur009500(--);Sfur010962(--);Sfur012081(ATG2B);Sfur013517(ATG16L1);Sfur014293(--);Sfur014647(--);MSTRG.20431(METTL18)	K17907+K17907+K00914+K17906+K17890+K00914+K00914+K17888
Organismal Systems	Immune system	Fc epsilon RI signaling pathway	1	32	0.998514	1	ko04664	Sfur006377(Dlish)	K04364
Environmental Information Processing	Signal transduction	mTOR signaling pathway	11	121	0.998659	1	ko04150	Sfur000079(RRAGA);Sfur001378(--);Sfur001629(--);Sfur001985(fz2);Sfur006377(Dlish);Sfur006427(InR);Sfur008260(Slc7a5);Sfur014127(Lpin1);Sfur014187(fzd10-a);Sfur014231(chrb);Sfur014612(Rps6ka2)	K16185+K05459+K04526+K02375+K04364+K04527+K13780+K15728+K02842+K08270+K04373
Genetic Information Processing	Replication and repair	Fanconi anemia pathway	15	151	0.998699	1	ko03460	Sfur000871(Top3a);Sfur001038(--);Sfur001479(Top3beta);Sfur001774(--);Sfur004900(FAN1);Sfur004940(PGBD2);Sfur004970(--);Sfur005462(RpA-70);Sfur005538(UBE2T);Sfur011211(POLI);Sfur011241(--);Sfur011757(--);Sfur012120(--);Sfur012767(--);Sfur013816(FANCD2)	K03165+K10848+K03165+K10848+K15363+K10895+K10848+K07466+K13960+K03510+K10848+K10848+K10848+K10848+K10891
Environmental Information Processing	Signal transduction	Calcium signaling pathway	16	159	0.998802	1	ko04020	Sfur000156(--);Sfur001371(MYLK);Sfur002888(Slc8a1);Sfur004985(Cyp1);Sfur005723(TpnC41C);Sfur006909(--);Sfur008383(cckar);Sfur008504(Pka-C1);Sfur009965(Itpr);Sfur011124(Avpr1b);Sfur011902(Slc8a1);Sfur012073(CALML4);Sfur012397(CAMK4);Sfur013596(TpnC41C);MSTRG.23839(ADCY9);MSTRG.38817(Itpr)	K16059+K00907+K05849+K09565+K02183+K07190+K04194+K04345+K04958+K04226+K05849+K02183+K05869+K02183+K08049+K04958
Human Diseases	Infectious diseases	Chagas disease (American trypanosomiasis)	2	45	0.99883	1	ko05142	Sfur000419(Calr);Sfur011999(--)	K08057+K03175
Human Diseases	Cardiovascular diseases	Hypertrophic cardiomyopathy (HCM)	9	107	0.998892	1	ko05410	Sfur000915(--);Sfur001378(--);Sfur001869(Act5C);Sfur002888(Slc8a1);Sfur010572(ttn-1);Sfur011902(Slc8a1);MSTRG.32159(Mylk);MSTRG.32164(CCDC141);MSTRG.32167(--)	K04870+K05459+K05692+K05849+K12567+K05849+K12567+K12567+K12567
Human Diseases	Neurodegenerative diseases	Huntington disease	48	376	0.998955	1	ko05016	Sfur000269(alphaTub84B);Sfur000616(TUBB4B);Sfur001288(Rpb4);Sfur001987(AtMg00820);Sfur002272(alphaTub84B);Sfur002673(TUBB4B);Sfur002696(alphaTub84B);Sfur002817(Y94H6A.8);Sfur003099(grin2b);Sfur003182(SOD1);Sfur003278(Rpb11);Sfur003329(--);Sfur003666(unc-64);Sfur004159(DCTN2-p50);Sfur004248(AP2M1);Sfur004491(POLR2E);Sfur004985(Cyp1);Sfur005046(betaTub60D);Sfur005578(Gpx6);Sfur005644(--);Sfur005841…	K07374+K07375+K03012+K10408+K07374+K07375+K07374+K11352+K05210+K04565+K03008+K04560+K04560+K10424+K11826+K03013+K09565+K07375+K00432+K10408+K17589+K03014+K04533+K10408+K10408+K10408+K17589+K00234+K04958+K10408+K00914+K07374+K07374+K10408+K17906+K02266+K03010+K10410+K02263+K00914+K00914+K03015+K07374+K09048+K09048+K04958+K11644+K11644
Environmental Information Processing	Signal transduction	cAMP signaling pathway	22	209	0.999445	1	ko04024	Sfur000117(l(2)03659);Sfur001743(pde-5);Sfur001919(SOX9);Sfur001941(gbb-1);Sfur001961(--);Sfur002376(GABBR2);Sfur003099(grin2b);Sfur004029(ppp1cc-a);Sfur004157(ppp1cc-a);Sfur004876(ptc);Sfur005723(TpnC41C);Sfur007675(Gpr161);Sfur008504(Pka-C1);Sfur009374(CNGB1);Sfur010067(pde-5);Sfur010316(Pde7b);Sfur012073(CALML4);Sfur012397(CAMK4);Sfur013596(TpnC41C);MSTRG.23839(ADCY9);MSTRG.37219(Creb3l4);MSTR…	K05673+K18438+K18435+K04615+K04952+K04615+K05210+K06269+K06269+K06225+K02183+K04145+K04345+K04952+K18438+K13293+K02183+K05869+K02183+K08049+K09048+K09048
Genetic Information Processing	Folding, sorting and degradation	Ubiquitin mediated proteolysis	11	129	0.999514	1	ko04120	Sfur001474(Anapc4);Sfur004691(UBE2R2);Sfur006020(ANAPC1);Sfur007692(UBE2C);Sfur008921(Rcc2);Sfur009399(CG4502);Sfur009737(UBE2L5);Sfur010975(UBE2F);Sfur011162(--);Sfur011999(--);MSTRG.22969(--)	K03351+K02207+K03348+K06688+K10595+K10582+K04552+K10687+K04506+K03175+K04707
Environmental Information Processing	Signal transduction	Wnt signaling pathway	15	160	0.999543	1	ko04310	Sfur000243(Tbl1x);Sfur000480(NPEPL1);Sfur001672(LHCGR);Sfur001985(fz2);Sfur003502(NLK);Sfur005793(pk);Sfur006433(--);Sfur008504(Pka-C1);Sfur011162(--);Sfur013145(dnt);Sfur014187(fzd10-a);Sfur015227(Cacybp);Sfur015437(--);Sfur015464(Vangl1);MSTRG.15131(BAMBI)	K04508+K02085+K08399+K02375+K04468+K04511+K19882+K04345+K04506+K05128+K02842+K04507+K04511+K04510+K10162
Environmental Information Processing	Signal transduction	Phosphatidylinositol signaling system	9	120	0.999812	1	ko04070	Sfur005723(TpnC41C);Sfur009965(Itpr);Sfur010962(--);Sfur011401(--);Sfur012073(CALML4);Sfur013596(TpnC41C);Sfur014293(--);Sfur014647(--);MSTRG.38817(Itpr)	K02183+K04958+K00914+K13711+K02183+K02183+K00914+K00914+K04958
Environmental Information Processing	Signaling molecules and interaction	Cell adhesion molecules (CAMs)	7	106	0.999878	1	ko04514	Sfur000224(NLGN4Y);Sfur004533(--);Sfur005332(Nrg);Sfur005567(Ars2);Sfur007520(--);Sfur012055(KIRREL3);Sfur013369(MAG)	K07378+K06496+K06756+K07378+K06496+K06491+K06766
Human Diseases	Cardiovascular diseases	Arrhythmogenic right ventricular cardiomyopathy (ARVC)	4	80	0.999908	1	ko05412	Sfur000915(--);Sfur001869(Act5C);Sfur002888(Slc8a1);Sfur011902(Slc8a1)	K04870+K05692+K05849+K05849
Organismal Systems	Nervous system	Retrograde endocannabinoid signaling	7	108	0.99991	1	ko04723	Sfur002817(Y94H6A.8);Sfur003989(LHT2);Sfur008504(Pka-C1);Sfur009965(Itpr);Sfur010314(LHT1);MSTRG.23839(ADCY9);MSTRG.38817(Itpr)	K11352+K15015+K04345+K04958+K15015+K08049+K04958
Organismal Systems	Immune system	T cell receptor signaling pathway	1	46	0.999915	1	ko04660	Sfur006377(Dlish)	K04364
Metabolism	Carbohydrate metabolism	Inositol phosphate metabolism	7	109	0.999923	1	ko00562	Sfur000490(--);Sfur008676(Mipp1);Sfur010962(--);Sfur011401(--);Sfur013637(miox);Sfur014293(--);Sfur014647(--)	K03103+K03103+K00914+K13711+K00469+K00914+K00914
Metabolism	Carbohydrate metabolism	Citrate cycle (TCA cycle)	10	135	0.999927	1	ko00020	Sfur000898(T05H10.6);Sfur002786(MDH2);Sfur007076(pdhb-1);Sfur009918(--);Sfur011418(Aco1);Sfur012700(Idh1);Sfur013726(IDH1);Sfur013861(--);MSTRG.4676(ACLY);MSTRG.4684(ACLY)	K00161+K00026+K00162+K00234+K01681+K00031+K00030+K00026+K01648+K01648
Human Diseases	Infectious diseases	Herpes simplex infection	22	240	0.999983	1	ko05168	Sfur000419(Calr);Sfur000672(SRSF2);Sfur001046(SRSF2);Sfur001151(PDIA3);Sfur002202(Src64B);Sfur002767(Src64B);Sfur003764(--);Sfur003810(--);Sfur004029(ppp1cc-a);Sfur004157(ppp1cc-a);Sfur006129(ttk);Sfur006499(AANAT1);Sfur006946(--);Sfur008253(Ptpn11);Sfur009744(--);Sfur011575(insm1);Sfur011581(--);Sfur011999(--);Sfur013955(--);Sfur014606(--);Sfur014771(Rbp1);Sfur015414(B52)	K08057+K12891+K12891+K08056+K05704+K05704+K09228+K09228+K06269+K06269+K09228+K09228+K09228+K07293+K09228+K09228+K09228+K03175+K09228+K02308+K12896+K12893
Organismal Systems	Environmental adaptation	Thermogenesis	27	285	0.999993	1	ko04714	Sfur001415(Pnpla2);Sfur001869(Act5C);Sfur002817(Y94H6A.8);Sfur003025(ACTL6B);Sfur006377(Dlish);Sfur006908(Bap60);Sfur008504(Pka-C1);Sfur009822(--);Sfur009918(--);Sfur010046(CPT1B);Sfur011893(SMARCC2);Sfur011918(--);Sfur012014(--);Sfur012262(JMJD1C);Sfur012982(Acsl1);Sfur013176(Cox6a1);Sfur014287(COX4I2);Sfur014542(osa);Sfur014612(Rps6ka2);Sfur014618(KDM1A);Sfur014709(brm);Sfur015371(ndufaf7);MSTR…	K16816+K05692+K11352+K11652+K04364+K11650+K04345+K19477+K00234+K08765+K11649+K16816+K16816+K15601+K01897+K02266+K02263+K11653+K04373+K11450+K11647+K18164+K08049+K11653+K09048+K09048+K07376
Human Diseases	Neurodegenerative diseases	Alzheimer disease	39	388	0.999999	1	ko05010	Sfur000269(alphaTub84B);Sfur000480(NPEPL1);Sfur000616(TUBB4B);Sfur001629(--);Sfur001985(fz2);Sfur002272(alphaTub84B);Sfur002673(TUBB4B);Sfur002696(alphaTub84B);Sfur002817(Y94H6A.8);Sfur003099(grin2b);Sfur004553(Drice);Sfur004985(Cyp1);Sfur005046(betaTub60D);Sfur005509(Nct);Sfur005723(TpnC41C);Sfur005841(RB1CC1);Sfur006427(InR);Sfur007288(LRP1);Sfur008091(RB1CC1);Sfur008187(GAPDH);Sfur009918(--);S…	K07374+K02085+K07375+K04526+K02375+K07374+K07375+K07374+K11352+K05210+K04397+K09565+K07375+K06171+K02183+K17589+K04527+K04550+K17589+K00134+K00234+K04958+K04532+K04532+K00914+K07374+K07374+K02183+K17906+K02266+K02183+K02842+K02263+K00914+K00914+K09054+K09054+K07374+K04958
Human Diseases	Neurodegenerative diseases	Parkinson disease	12	199	1	1	ko05012	Sfur000422(SLC18B1);Sfur002817(Y94H6A.8);Sfur003132(DAT);Sfur004985(Cyp1);Sfur007675(Gpr161);Sfur008504(Pka-C1);Sfur009737(UBE2L5);Sfur009918(--);Sfur010310(ple);Sfur013176(Cox6a1);Sfur014287(COX4I2);Sfur014303(SLC18A2)	K08155+K11352+K05036+K09565+K04145+K04345+K04552+K00234+K00501+K02266+K02263+K08155
Metabolism	Energy metabolism	Oxidative phosphorylation	7	192	1	1	ko00190	Sfur001004(atp6v0a1);Sfur002817(Y94H6A.8);Sfur009516(ATP6V0B);Sfur009918(--);Sfur013176(Cox6a1);Sfur013642(ATP6V0D1);Sfur014287(COX4I2)	K02154+K11352+K03661+K00234+K02266+K02146+K02263
Genetic Information Processing	Translation	Ribosome	3	130	1	1	ko03010	Sfur000862(RpL38);Sfur004802(WDY);Sfur009198(Rpl35)	K02923+K02988+K02918
Human Diseases	Endocrine and metabolic diseases	Non-alcoholic fatty liver disease (NAFLD)	10	186	1	1	ko04932	Sfur001629(--);Sfur002817(Y94H6A.8);Sfur003323(Mlxipl);Sfur004553(Drice);Sfur005716(PAQR3);Sfur006427(InR);Sfur008731(RXR);Sfur009918(--);Sfur013176(Cox6a1);Sfur014287(COX4I2)	K04526+K11352+K09113+K04397+K07297+K04527+K08524+K00234+K02266+K02263

## Sheet: DE-vs-AE
Trans
KEGG_A_class	KEGG_B_class	Pathway	trans (16)	All (6457)	Pvalue	Qvalue	Pathway ID	Genes	K_IDs
Metabolism	Carbohydrate metabolism	Amino sugar and nucleotide sugar metabolism	2	89	0.0198861	0.378179	ko00520	Sfur001403(nrf-6);MSTRG.13565(--)	K01183+K01183
Genetic Information Processing	Translation	RNA transport	3	259	0.0242491	0.378179	ko03013	Sfur003977(to);Sfur005166(--);Sfur014940(--)	K07936+K14288+K14288
Organismal Systems	Environmental adaptation	Circadian rhythm - fly	1	16	0.038963	0.378179	ko04711	Sfur010509(HLF)	K09057
Human Diseases	Immune diseases	Systemic lupus erythematosus	1	25	0.0602495	0.378179	ko05322	Sfur006302(Actn)	K05699
Organismal Systems	Immune system	Cytosolic DNA-sensing pathway	1	26	0.0625872	0.378179	ko04623	Sfur014522(--)	K03024
Genetic Information Processing	Transcription	RNA polymerase	1	30	0.0718835	0.378179	ko03020	Sfur014522(--)	K03024
Metabolism	Amino acid metabolism	Tyrosine metabolism	1	33	0.078799	0.378179	ko00350	Sfur009253(y)	K22203
Organismal Systems	Immune system	Complement and coagulation cascades	1	33	0.078799	0.378179	ko04610	MSTRG.28022(Ppn)	K03909
Human Diseases	Infectious diseases	Legionellosis	1	35	0.0833824	0.378179	ko05134	MSTRG.12076(Hsp68)	K03283
Cellular Processes	Transport and catabolism	Autophagy - animal	2	198	0.0847285	0.378179	ko04140	Sfur006579(PGBD2);Sfur007641(--)	K00914+K07359
Organismal Systems	Immune system	Antigen processing and presentation	1	36	0.0856661	0.378179	ko04612	MSTRG.12076(Hsp68)	K03283
Human Diseases	Infectious diseases	Shigellosis	2	201	0.0869497	0.378179	ko05131	Sfur006302(Actn);Sfur006579(PGBD2)	K05699+K00914
Organismal Systems	Endocrine system	Adipocytokine signaling pathway	1	40	0.0947477	0.378179	ko04920	Sfur007641(--)	K07359
Human Diseases	Infectious diseases	Toxoplasmosis	1	47	0.110437	0.378179	ko05145	MSTRG.12076(Hsp68)	K03283
Environmental Information Processing	Signal transduction	TNF signaling pathway	1	51	0.119288	0.378179	ko04668	MSTRG.31097(DNM1L)	K17065
Organismal Systems	Immune system	Leukocyte transendothelial migration	1	51	0.119288	0.378179	ko04670	Sfur006302(Actn)	K05699
Human Diseases	Infectious diseases	Measles	1	54	0.125871	0.378179	ko05162	MSTRG.12076(Hsp68)	K03283
Organismal Systems	Endocrine system	Regulation of lipolysis in adipocyte	1	60	0.138901	0.378179	ko04923	Sfur011918(--)	K16816
Organismal Systems	Aging	Longevity regulating pathway - multiple species	1	68	0.15599	0.378179	ko04213	MSTRG.12076(Hsp68)	K03283
Cellular Processes	Cell growth and death	Necroptosis	1	71	0.162316	0.378179	ko04217	MSTRG.31097(DNM1L)	K17065
Cellular Processes	Cell growth and death	Apoptosis - fly	1	74	0.168598	0.378179	ko04214	MSTRG.31097(DNM1L)	K17065
Cellular Processes	Cellular community - eukaryotes	Adherens junction	1	75	0.170682	0.378179	ko04520	Sfur006302(Actn)	K05699
Human Diseases	Infectious diseases	Amoebiasis	1	75	0.170682	0.378179	ko05146	Sfur006302(Actn)	K05699
Metabolism	Lipid metabolism	Glycerolipid metabolism	1	79	0.178969	0.378179	ko00561	Sfur011918(--)	K16816
Organismal Systems	Aging	Longevity regulating pathway - mammal	1	80	0.181029	0.378179	ko04211	Sfur007641(--)	K07359
Organismal Systems	Immune system	NOD-like receptor signaling pathway	1	89	0.199349	0.378179	ko04621	MSTRG.31097(DNM1L)	K17065
Human Diseases	Substance dependence	Alcoholism	1	93	0.207367	0.378179	ko05034	Sfur007641(--)	K07359
Cellular Processes	Transport and catabolism	Autophagy - other eukaryotes	1	96	0.213332	0.378179	ko04136	Sfur006579(PGBD2)	K00914
Organismal Systems	Endocrine system	Estrogen signaling pathway	1	98	0.217284	0.378179	ko04915	MSTRG.12076(Hsp68)	K03283
Environmental Information Processing	Signal transduction	AMPK signaling pathway	1	102	0.225134	0.378179	ko04152	Sfur007641(--)	K07359
Human Diseases	Infectious diseases	Kaposi sarcoma-associated herpesvirus infection	1	107	0.234843	0.378179	ko05167	Sfur006579(PGBD2)	K00914
Metabolism	Carbohydrate metabolism	Inositol phosphate metabolism	1	109	0.238694	0.378179	ko00562	Sfur006579(PGBD2)	K00914
Human Diseases	Infectious diseases	Tuberculosis	1	109	0.238694	0.378179	ko05152	Sfur006579(PGBD2)	K00914
Genetic Information Processing	Translation	Ribosome biogenesis in eukaryotes	1	118	0.255801	0.378179	ko03008	Sfur003977(to)	K07936
Human Diseases	Neurodegenerative disease	Spinocerebellar ataxia	1	118	0.255801	0.378179	ko05017	Sfur006579(PGBD2)	K00914
Environmental Information Processing	Signal transduction	Phosphatidylinositol signaling system	1	120	0.259554	0.378179	ko04070	Sfur006579(PGBD2)	K00914
Environmental Information Processing	Signal transduction	Apelin signaling pathway	1	126	0.270705	0.378179	ko04371	Sfur006579(PGBD2)	K00914
Organismal Systems	Endocrine system	Oxytocin signaling pathway	1	128	0.274386	0.378179	ko04921	Sfur007641(--)	K07359
Cellular Processes	Cellular community - eukaryotes	Tight junction	1	129	0.276221	0.378179	ko04530	Sfur006302(Actn)	K05699
Human Diseases	Cancers	Viral carcinogenesis	1	133	0.283515	0.378179	ko05203	Sfur006302(Actn)	K05699
Cellular Processes	Transport and catabolism	Phagosome	1	135	0.287136	0.378179	ko04145	Sfur006579(PGBD2)	K00914
Environmental Information Processing	Signal transduction	MAPK signaling pathway	1	144	0.30322	0.384173	ko04010	MSTRG.12076(Hsp68)	K03283
Cellular Processes	Cellular community - eukaryotes	Focal adhesion	1	150	0.313753	0.384173	ko04510	Sfur006302(Actn)	K05699
Human Diseases	Infectious diseases	HTLV-I infection	1	150	0.313753	0.384173	ko05166	Sfur003977(to)	K07936
Genetic Information Processing	Transcription	Spliceosome	1	157	0.325853	0.384173	ko03040	MSTRG.12076(Hsp68)	K03283
Cellular Processes	Cell motility	Regulation of actin cytoskeleton	1	158	0.327565	0.384173	ko04810	Sfur006302(Actn)	K05699
Genetic Information Processing	Folding, sorting and degradation	Protein processing in endoplasmic reticulum	1	162	0.334373	0.384173	ko04141	MSTRG.12076(Hsp68)	K03283
Environmental Information Processing	Signaling molecules and interaction	Neuroactive ligand-receptor interaction	1	177	0.359331	0.391599	ko04080	Sfur013740(PK1-R)	K05052
Human Diseases	Infectious diseases	Salmonella infection	1	178	0.360963	0.391599	ko05132	Sfur006579(PGBD2)	K00914
Cellular Processes	Transport and catabolism	Endocytosis	1	179	0.362591	0.391599	ko04144	MSTRG.12076(Hsp68)	K03283
Metabolism	Global and overview maps	Metabolic pathways	5	1615	0.370163	0.391937	ko01100	Sfur001403(nrf-6);Sfur006579(PGBD2);Sfur009253(y);Sfur011918(--);MSTRG.13565(--)	K01183+K00914+K22203+K16816+K01183
Organismal Systems	Environmental adaptation	Thermogenesis	1	285	0.514769	0.534567	ko04714	Sfur011918(--)	K16816
Human Diseases	Neurodegenerative diseases	Huntington disease	1	376	0.617521	0.629172	ko05016	Sfur006579(PGBD2)	K00914
Human Diseases	Neurodegenerative diseases	Alzheimer disease	1	388	0.629435	0.629435	ko05010	Sfur006579(PGBD2)	K00914
