# Supplementary material for: Interaction Analysis of lncRNA and mRNA Based on the Full-Length Transcriptome of the Nymph-to-Adult Developmental Transition of Sogatella furcifera
Source: Insects. 2023 Mar 23;14(4):308. doi: 10.3390/insects14040308 (PMC10141146; doi:10.3390/insects14040308)
Supplement: Supplementary file 1 [file insects-14-00308-s001.zip › Table S10. LncRNA -based prediction of amino sugar and nucleotide sugar metabolism pathway genes..xls]

lncRNA_id	GeneID	cor	p_value	Symbol	Description	KEGG_A_class	KEGG_B_class	Pathway	K_ID	GO Component	GO Function	GO Process
MSTRG.16086.1	Sfur004784	-0.986848936	0.000258288	Gfpt2	Glutamine--fructose-6-phosphate aminotransferase [isomerizing] 2	Metabolism;Metabolism;Human Diseases;Metabolism	Global and overview maps;Carbohydrate metabolism;Endocrine and metabolic diseases;Amino acid metabolism	ko01100//Metabolic pathways;ko00520//Amino sugar and nucleotide sugar metabolism;ko04931//Insulin resistance;ko00250//Alanine, aspartate and glutamate metabolism	K00820;K00820;K00820;K00820	-	GO:0004360//glutamine-fructose-6-phosphate transaminase (isomerizing) activity;GO:0097367//carbohydrate derivative binding	GO:0006002//fructose 6-phosphate metabolic process;GO:0006047//UDP-N-acetylglucosamine metabolic process;GO:0006048//UDP-N-acetylglucosamine biosynthetic process;GO:0006487//protein N-linked glycosylation;GO:0006541//glutamine metabolic process;GO:1990830//cellular response to leukemia inhibitory factor
MSTRG.16087.1	Sfur004784	-0.99090645	0.000123663	Gfpt2	Glutamine--fructose-6-phosphate aminotransferase [isomerizing] 2	Metabolism;Metabolism;Human Diseases;Metabolism	Global and overview maps;Carbohydrate metabolism;Endocrine and metabolic diseases;Amino acid metabolism	ko01100//Metabolic pathways;ko00520//Amino sugar and nucleotide sugar metabolism;ko04931//Insulin resistance;ko00250//Alanine, aspartate and glutamate metabolism	K00820;K00820;K00820;K00820	-	GO:0004360//glutamine-fructose-6-phosphate transaminase (isomerizing) activity;GO:0097367//carbohydrate derivative binding	GO:0006002//fructose 6-phosphate metabolic process;GO:0006047//UDP-N-acetylglucosamine metabolic process;GO:0006048//UDP-N-acetylglucosamine biosynthetic process;GO:0006487//protein N-linked glycosylation;GO:0006541//glutamine metabolic process;GO:1990830//cellular response to leukemia inhibitory factor
MSTRG.33773.1	Sfur004784	-0.984931435	0.000338882	Gfpt2	Glutamine--fructose-6-phosphate aminotransferase [isomerizing] 2	Metabolism;Metabolism;Human Diseases;Metabolism	Global and overview maps;Carbohydrate metabolism;Endocrine and metabolic diseases;Amino acid metabolism	ko01100//Metabolic pathways;ko00520//Amino sugar and nucleotide sugar metabolism;ko04931//Insulin resistance;ko00250//Alanine, aspartate and glutamate metabolism	K00820;K00820;K00820;K00820	-	GO:0004360//glutamine-fructose-6-phosphate transaminase (isomerizing) activity;GO:0097367//carbohydrate derivative binding	GO:0006002//fructose 6-phosphate metabolic process;GO:0006047//UDP-N-acetylglucosamine metabolic process;GO:0006048//UDP-N-acetylglucosamine biosynthetic process;GO:0006487//protein N-linked glycosylation;GO:0006541//glutamine metabolic process;GO:1990830//cellular response to leukemia inhibitory factor
MSTRG.37207.2	Sfur004784	-0.970925153	0.001255731	Gfpt2	Glutamine--fructose-6-phosphate aminotransferase [isomerizing] 2	Metabolism;Metabolism;Human Diseases;Metabolism	Global and overview maps;Carbohydrate metabolism;Endocrine and metabolic diseases;Amino acid metabolism	ko01100//Metabolic pathways;ko00520//Amino sugar and nucleotide sugar metabolism;ko04931//Insulin resistance;ko00250//Alanine, aspartate and glutamate metabolism	K00820;K00820;K00820;K00820	-	GO:0004360//glutamine-fructose-6-phosphate transaminase (isomerizing) activity;GO:0097367//carbohydrate derivative binding	GO:0006002//fructose 6-phosphate metabolic process;GO:0006047//UDP-N-acetylglucosamine metabolic process;GO:0006048//UDP-N-acetylglucosamine biosynthetic process;GO:0006487//protein N-linked glycosylation;GO:0006541//glutamine metabolic process;GO:1990830//cellular response to leukemia inhibitory factor
MSTRG.19835.2	Sfur004784	0.968180786	0.001502586	Gfpt2	Glutamine--fructose-6-phosphate aminotransferase [isomerizing] 2	Metabolism;Metabolism;Human Diseases;Metabolism	Global and overview maps;Carbohydrate metabolism;Endocrine and metabolic diseases;Amino acid metabolism	ko01100//Metabolic pathways;ko00520//Amino sugar and nucleotide sugar metabolism;ko04931//Insulin resistance;ko00250//Alanine, aspartate and glutamate metabolism	K00820;K00820;K00820;K00820	-	GO:0004360//glutamine-fructose-6-phosphate transaminase (isomerizing) activity;GO:0097367//carbohydrate derivative binding	GO:0006002//fructose 6-phosphate metabolic process;GO:0006047//UDP-N-acetylglucosamine metabolic process;GO:0006048//UDP-N-acetylglucosamine biosynthetic process;GO:0006487//protein N-linked glycosylation;GO:0006541//glutamine metabolic process;GO:1990830//cellular response to leukemia inhibitory factor
MSTRG.8295.1	Sfur004784	-0.988022568	0.000214329	Gfpt2	Glutamine--fructose-6-phosphate aminotransferase [isomerizing] 2	Metabolism;Metabolism;Human Diseases;Metabolism	Global and overview maps;Carbohydrate metabolism;Endocrine and metabolic diseases;Amino acid metabolism	ko01100//Metabolic pathways;ko00520//Amino sugar and nucleotide sugar metabolism;ko04931//Insulin resistance;ko00250//Alanine, aspartate and glutamate metabolism	K00820;K00820;K00820;K00820	-	GO:0004360//glutamine-fructose-6-phosphate transaminase (isomerizing) activity;GO:0097367//carbohydrate derivative binding	GO:0006002//fructose 6-phosphate metabolic process;GO:0006047//UDP-N-acetylglucosamine metabolic process;GO:0006048//UDP-N-acetylglucosamine biosynthetic process;GO:0006487//protein N-linked glycosylation;GO:0006541//glutamine metabolic process;GO:1990830//cellular response to leukemia inhibitory factor
MSTRG.16908.1	Sfur004784	-0.97646894	0.000824051	Gfpt2	Glutamine--fructose-6-phosphate aminotransferase [isomerizing] 2	Metabolism;Metabolism;Human Diseases;Metabolism	Global and overview maps;Carbohydrate metabolism;Endocrine and metabolic diseases;Amino acid metabolism	ko01100//Metabolic pathways;ko00520//Amino sugar and nucleotide sugar metabolism;ko04931//Insulin resistance;ko00250//Alanine, aspartate and glutamate metabolism	K00820;K00820;K00820;K00820	-	GO:0004360//glutamine-fructose-6-phosphate transaminase (isomerizing) activity;GO:0097367//carbohydrate derivative binding	GO:0006002//fructose 6-phosphate metabolic process;GO:0006047//UDP-N-acetylglucosamine metabolic process;GO:0006048//UDP-N-acetylglucosamine biosynthetic process;GO:0006487//protein N-linked glycosylation;GO:0006541//glutamine metabolic process;GO:1990830//cellular response to leukemia inhibitory factor
MSTRG.23212.1	Sfur004784	0.989019635	0.000180191	Gfpt2	Glutamine--fructose-6-phosphate aminotransferase [isomerizing] 2	Metabolism;Metabolism;Human Diseases;Metabolism	Global and overview maps;Carbohydrate metabolism;Endocrine and metabolic diseases;Amino acid metabolism	ko01100//Metabolic pathways;ko00520//Amino sugar and nucleotide sugar metabolism;ko04931//Insulin resistance;ko00250//Alanine, aspartate and glutamate metabolism	K00820;K00820;K00820;K00820	-	GO:0004360//glutamine-fructose-6-phosphate transaminase (isomerizing) activity;GO:0097367//carbohydrate derivative binding	GO:0006002//fructose 6-phosphate metabolic process;GO:0006047//UDP-N-acetylglucosamine metabolic process;GO:0006048//UDP-N-acetylglucosamine biosynthetic process;GO:0006487//protein N-linked glycosylation;GO:0006541//glutamine metabolic process;GO:1990830//cellular response to leukemia inhibitory factor
MSTRG.11199.1	Sfur004784	-0.995135504	3.54E-05	Gfpt2	Glutamine--fructose-6-phosphate aminotransferase [isomerizing] 2	Metabolism;Metabolism;Human Diseases;Metabolism	Global and overview maps;Carbohydrate metabolism;Endocrine and metabolic diseases;Amino acid metabolism	ko01100//Metabolic pathways;ko00520//Amino sugar and nucleotide sugar metabolism;ko04931//Insulin resistance;ko00250//Alanine, aspartate and glutamate metabolism	K00820;K00820;K00820;K00820	-	GO:0004360//glutamine-fructose-6-phosphate transaminase (isomerizing) activity;GO:0097367//carbohydrate derivative binding	GO:0006002//fructose 6-phosphate metabolic process;GO:0006047//UDP-N-acetylglucosamine metabolic process;GO:0006048//UDP-N-acetylglucosamine biosynthetic process;GO:0006487//protein N-linked glycosylation;GO:0006541//glutamine metabolic process;GO:1990830//cellular response to leukemia inhibitory factor
MSTRG.37208.3	Sfur004784	-0.960211357	0.002343209	Gfpt2	Glutamine--fructose-6-phosphate aminotransferase [isomerizing] 2	Metabolism;Metabolism;Human Diseases;Metabolism	Global and overview maps;Carbohydrate metabolism;Endocrine and metabolic diseases;Amino acid metabolism	ko01100//Metabolic pathways;ko00520//Amino sugar and nucleotide sugar metabolism;ko04931//Insulin resistance;ko00250//Alanine, aspartate and glutamate metabolism	K00820;K00820;K00820;K00820	-	GO:0004360//glutamine-fructose-6-phosphate transaminase (isomerizing) activity;GO:0097367//carbohydrate derivative binding	GO:0006002//fructose 6-phosphate metabolic process;GO:0006047//UDP-N-acetylglucosamine metabolic process;GO:0006048//UDP-N-acetylglucosamine biosynthetic process;GO:0006487//protein N-linked glycosylation;GO:0006541//glutamine metabolic process;GO:1990830//cellular response to leukemia inhibitory factor
MSTRG.28277.1	Sfur004784	0.986557358	0.000269842	Gfpt2	Glutamine--fructose-6-phosphate aminotransferase [isomerizing] 2	Metabolism;Metabolism;Human Diseases;Metabolism	Global and overview maps;Carbohydrate metabolism;Endocrine and metabolic diseases;Amino acid metabolism	ko01100//Metabolic pathways;ko00520//Amino sugar and nucleotide sugar metabolism;ko04931//Insulin resistance;ko00250//Alanine, aspartate and glutamate metabolism	K00820;K00820;K00820;K00820	-	GO:0004360//glutamine-fructose-6-phosphate transaminase (isomerizing) activity;GO:0097367//carbohydrate derivative binding	GO:0006002//fructose 6-phosphate metabolic process;GO:0006047//UDP-N-acetylglucosamine metabolic process;GO:0006048//UDP-N-acetylglucosamine biosynthetic process;GO:0006487//protein N-linked glycosylation;GO:0006541//glutamine metabolic process;GO:1990830//cellular response to leukemia inhibitory factor
MSTRG.32060.1	Sfur004784	-0.979128253	0.000648899	Gfpt2	Glutamine--fructose-6-phosphate aminotransferase [isomerizing] 2	Metabolism;Metabolism;Human Diseases;Metabolism	Global and overview maps;Carbohydrate metabolism;Endocrine and metabolic diseases;Amino acid metabolism	ko01100//Metabolic pathways;ko00520//Amino sugar and nucleotide sugar metabolism;ko04931//Insulin resistance;ko00250//Alanine, aspartate and glutamate metabolism	K00820;K00820;K00820;K00820	-	GO:0004360//glutamine-fructose-6-phosphate transaminase (isomerizing) activity;GO:0097367//carbohydrate derivative binding	GO:0006002//fructose 6-phosphate metabolic process;GO:0006047//UDP-N-acetylglucosamine metabolic process;GO:0006048//UDP-N-acetylglucosamine biosynthetic process;GO:0006487//protein N-linked glycosylation;GO:0006541//glutamine metabolic process;GO:1990830//cellular response to leukemia inhibitory factor
MSTRG.2447.1	Sfur004784	-0.994425665	4.65E-05	Gfpt2	Glutamine--fructose-6-phosphate aminotransferase [isomerizing] 2	Metabolism;Metabolism;Human Diseases;Metabolism	Global and overview maps;Carbohydrate metabolism;Endocrine and metabolic diseases;Amino acid metabolism	ko01100//Metabolic pathways;ko00520//Amino sugar and nucleotide sugar metabolism;ko04931//Insulin resistance;ko00250//Alanine, aspartate and glutamate metabolism	K00820;K00820;K00820;K00820	-	GO:0004360//glutamine-fructose-6-phosphate transaminase (isomerizing) activity;GO:0097367//carbohydrate derivative binding	GO:0006002//fructose 6-phosphate metabolic process;GO:0006047//UDP-N-acetylglucosamine metabolic process;GO:0006048//UDP-N-acetylglucosamine biosynthetic process;GO:0006487//protein N-linked glycosylation;GO:0006541//glutamine metabolic process;GO:1990830//cellular response to leukemia inhibitory factor
MSTRG.34473.3	Sfur004784	-0.988358945	0.000202482	Gfpt2	Glutamine--fructose-6-phosphate aminotransferase [isomerizing] 2	Metabolism;Metabolism;Human Diseases;Metabolism	Global and overview maps;Carbohydrate metabolism;Endocrine and metabolic diseases;Amino acid metabolism	ko01100//Metabolic pathways;ko00520//Amino sugar and nucleotide sugar metabolism;ko04931//Insulin resistance;ko00250//Alanine, aspartate and glutamate metabolism	K00820;K00820;K00820;K00820	-	GO:0004360//glutamine-fructose-6-phosphate transaminase (isomerizing) activity;GO:0097367//carbohydrate derivative binding	GO:0006002//fructose 6-phosphate metabolic process;GO:0006047//UDP-N-acetylglucosamine metabolic process;GO:0006048//UDP-N-acetylglucosamine biosynthetic process;GO:0006487//protein N-linked glycosylation;GO:0006541//glutamine metabolic process;GO:1990830//cellular response to leukemia inhibitory factor
MSTRG.34474.2	Sfur004784	-0.996171615	2.20E-05	Gfpt2	Glutamine--fructose-6-phosphate aminotransferase [isomerizing] 2	Metabolism;Metabolism;Human Diseases;Metabolism	Global and overview maps;Carbohydrate metabolism;Endocrine and metabolic diseases;Amino acid metabolism	ko01100//Metabolic pathways;ko00520//Amino sugar and nucleotide sugar metabolism;ko04931//Insulin resistance;ko00250//Alanine, aspartate and glutamate metabolism	K00820;K00820;K00820;K00820	-	GO:0004360//glutamine-fructose-6-phosphate transaminase (isomerizing) activity;GO:0097367//carbohydrate derivative binding	GO:0006002//fructose 6-phosphate metabolic process;GO:0006047//UDP-N-acetylglucosamine metabolic process;GO:0006048//UDP-N-acetylglucosamine biosynthetic process;GO:0006487//protein N-linked glycosylation;GO:0006541//glutamine metabolic process;GO:1990830//cellular response to leukemia inhibitory factor
MSTRG.39995.1	Sfur004784	0.996376087	1.97E-05	Gfpt2	Glutamine--fructose-6-phosphate aminotransferase [isomerizing] 2	Metabolism;Metabolism;Human Diseases;Metabolism	Global and overview maps;Carbohydrate metabolism;Endocrine and metabolic diseases;Amino acid metabolism	ko01100//Metabolic pathways;ko00520//Amino sugar and nucleotide sugar metabolism;ko04931//Insulin resistance;ko00250//Alanine, aspartate and glutamate metabolism	K00820;K00820;K00820;K00820	-	GO:0004360//glutamine-fructose-6-phosphate transaminase (isomerizing) activity;GO:0097367//carbohydrate derivative binding	GO:0006002//fructose 6-phosphate metabolic process;GO:0006047//UDP-N-acetylglucosamine metabolic process;GO:0006048//UDP-N-acetylglucosamine biosynthetic process;GO:0006487//protein N-linked glycosylation;GO:0006541//glutamine metabolic process;GO:1990830//cellular response to leukemia inhibitory factor
MSTRG.28277.2	Sfur004784	0.963001981	0.002027958	Gfpt2	Glutamine--fructose-6-phosphate aminotransferase [isomerizing] 2	Metabolism;Metabolism;Human Diseases;Metabolism	Global and overview maps;Carbohydrate metabolism;Endocrine and metabolic diseases;Amino acid metabolism	ko01100//Metabolic pathways;ko00520//Amino sugar and nucleotide sugar metabolism;ko04931//Insulin resistance;ko00250//Alanine, aspartate and glutamate metabolism	K00820;K00820;K00820;K00820	-	GO:0004360//glutamine-fructose-6-phosphate transaminase (isomerizing) activity;GO:0097367//carbohydrate derivative binding	GO:0006002//fructose 6-phosphate metabolic process;GO:0006047//UDP-N-acetylglucosamine metabolic process;GO:0006048//UDP-N-acetylglucosamine biosynthetic process;GO:0006487//protein N-linked glycosylation;GO:0006541//glutamine metabolic process;GO:1990830//cellular response to leukemia inhibitory factor
MSTRG.10562.1	Sfur004784	-0.991984725	9.61E-05	Gfpt2	Glutamine--fructose-6-phosphate aminotransferase [isomerizing] 2	Metabolism;Metabolism;Human Diseases;Metabolism	Global and overview maps;Carbohydrate metabolism;Endocrine and metabolic diseases;Amino acid metabolism	ko01100//Metabolic pathways;ko00520//Amino sugar and nucleotide sugar metabolism;ko04931//Insulin resistance;ko00250//Alanine, aspartate and glutamate metabolism	K00820;K00820;K00820;K00820	-	GO:0004360//glutamine-fructose-6-phosphate transaminase (isomerizing) activity;GO:0097367//carbohydrate derivative binding	GO:0006002//fructose 6-phosphate metabolic process;GO:0006047//UDP-N-acetylglucosamine metabolic process;GO:0006048//UDP-N-acetylglucosamine biosynthetic process;GO:0006487//protein N-linked glycosylation;GO:0006541//glutamine metabolic process;GO:1990830//cellular response to leukemia inhibitory factor
MSTRG.30274.1	Sfur004784	-0.9810987	0.000532512	Gfpt2	Glutamine--fructose-6-phosphate aminotransferase [isomerizing] 2	Metabolism;Metabolism;Human Diseases;Metabolism	Global and overview maps;Carbohydrate metabolism;Endocrine and metabolic diseases;Amino acid metabolism	ko01100//Metabolic pathways;ko00520//Amino sugar and nucleotide sugar metabolism;ko04931//Insulin resistance;ko00250//Alanine, aspartate and glutamate metabolism	K00820;K00820;K00820;K00820	-	GO:0004360//glutamine-fructose-6-phosphate transaminase (isomerizing) activity;GO:0097367//carbohydrate derivative binding	GO:0006002//fructose 6-phosphate metabolic process;GO:0006047//UDP-N-acetylglucosamine metabolic process;GO:0006048//UDP-N-acetylglucosamine biosynthetic process;GO:0006487//protein N-linked glycosylation;GO:0006541//glutamine metabolic process;GO:1990830//cellular response to leukemia inhibitory factor
MSTRG.20058.1	Sfur004784	-0.983270583	0.000417469	Gfpt2	Glutamine--fructose-6-phosphate aminotransferase [isomerizing] 2	Metabolism;Metabolism;Human Diseases;Metabolism	Global and overview maps;Carbohydrate metabolism;Endocrine and metabolic diseases;Amino acid metabolism	ko01100//Metabolic pathways;ko00520//Amino sugar and nucleotide sugar metabolism;ko04931//Insulin resistance;ko00250//Alanine, aspartate and glutamate metabolism	K00820;K00820;K00820;K00820	-	GO:0004360//glutamine-fructose-6-phosphate transaminase (isomerizing) activity;GO:0097367//carbohydrate derivative binding	GO:0006002//fructose 6-phosphate metabolic process;GO:0006047//UDP-N-acetylglucosamine metabolic process;GO:0006048//UDP-N-acetylglucosamine biosynthetic process;GO:0006487//protein N-linked glycosylation;GO:0006541//glutamine metabolic process;GO:1990830//cellular response to leukemia inhibitory factor
MSTRG.19036.1	Sfur004784	0.980163532	0.000586326	Gfpt2	Glutamine--fructose-6-phosphate aminotransferase [isomerizing] 2	Metabolism;Metabolism;Human Diseases;Metabolism	Global and overview maps;Carbohydrate metabolism;Endocrine and metabolic diseases;Amino acid metabolism	ko01100//Metabolic pathways;ko00520//Amino sugar and nucleotide sugar metabolism;ko04931//Insulin resistance;ko00250//Alanine, aspartate and glutamate metabolism	K00820;K00820;K00820;K00820	-	GO:0004360//glutamine-fructose-6-phosphate transaminase (isomerizing) activity;GO:0097367//carbohydrate derivative binding	GO:0006002//fructose 6-phosphate metabolic process;GO:0006047//UDP-N-acetylglucosamine metabolic process;GO:0006048//UDP-N-acetylglucosamine biosynthetic process;GO:0006487//protein N-linked glycosylation;GO:0006541//glutamine metabolic process;GO:1990830//cellular response to leukemia inhibitory factor
MSTRG.38291.5	Sfur004784	-0.989281123	0.000171726	Gfpt2	Glutamine--fructose-6-phosphate aminotransferase [isomerizing] 2	Metabolism;Metabolism;Human Diseases;Metabolism	Global and overview maps;Carbohydrate metabolism;Endocrine and metabolic diseases;Amino acid metabolism	ko01100//Metabolic pathways;ko00520//Amino sugar and nucleotide sugar metabolism;ko04931//Insulin resistance;ko00250//Alanine, aspartate and glutamate metabolism	K00820;K00820;K00820;K00820	-	GO:0004360//glutamine-fructose-6-phosphate transaminase (isomerizing) activity;GO:0097367//carbohydrate derivative binding	GO:0006002//fructose 6-phosphate metabolic process;GO:0006047//UDP-N-acetylglucosamine metabolic process;GO:0006048//UDP-N-acetylglucosamine biosynthetic process;GO:0006487//protein N-linked glycosylation;GO:0006541//glutamine metabolic process;GO:1990830//cellular response to leukemia inhibitory factor
MSTRG.36165.1	Sfur004784	0.989955046	0.000150845	Gfpt2	Glutamine--fructose-6-phosphate aminotransferase [isomerizing] 2	Metabolism;Metabolism;Human Diseases;Metabolism	Global and overview maps;Carbohydrate metabolism;Endocrine and metabolic diseases;Amino acid metabolism	ko01100//Metabolic pathways;ko00520//Amino sugar and nucleotide sugar metabolism;ko04931//Insulin resistance;ko00250//Alanine, aspartate and glutamate metabolism	K00820;K00820;K00820;K00820	-	GO:0004360//glutamine-fructose-6-phosphate transaminase (isomerizing) activity;GO:0097367//carbohydrate derivative binding	GO:0006002//fructose 6-phosphate metabolic process;GO:0006047//UDP-N-acetylglucosamine metabolic process;GO:0006048//UDP-N-acetylglucosamine biosynthetic process;GO:0006487//protein N-linked glycosylation;GO:0006541//glutamine metabolic process;GO:1990830//cellular response to leukemia inhibitory factor
MSTRG.10294.2	Sfur004784	0.967823145	0.001536368	Gfpt2	Glutamine--fructose-6-phosphate aminotransferase [isomerizing] 2	Metabolism;Metabolism;Human Diseases;Metabolism	Global and overview maps;Carbohydrate metabolism;Endocrine and metabolic diseases;Amino acid metabolism	ko01100//Metabolic pathways;ko00520//Amino sugar and nucleotide sugar metabolism;ko04931//Insulin resistance;ko00250//Alanine, aspartate and glutamate metabolism	K00820;K00820;K00820;K00820	-	GO:0004360//glutamine-fructose-6-phosphate transaminase (isomerizing) activity;GO:0097367//carbohydrate derivative binding	GO:0006002//fructose 6-phosphate metabolic process;GO:0006047//UDP-N-acetylglucosamine metabolic process;GO:0006048//UDP-N-acetylglucosamine biosynthetic process;GO:0006487//protein N-linked glycosylation;GO:0006541//glutamine metabolic process;GO:1990830//cellular response to leukemia inhibitory factor
MSTRG.25434.2	Sfur004784	-0.953200661	0.003234018	Gfpt2	Glutamine--fructose-6-phosphate aminotransferase [isomerizing] 2	Metabolism;Metabolism;Human Diseases;Metabolism	Global and overview maps;Carbohydrate metabolism;Endocrine and metabolic diseases;Amino acid metabolism	ko01100//Metabolic pathways;ko00520//Amino sugar and nucleotide sugar metabolism;ko04931//Insulin resistance;ko00250//Alanine, aspartate and glutamate metabolism	K00820;K00820;K00820;K00820	-	GO:0004360//glutamine-fructose-6-phosphate transaminase (isomerizing) activity;GO:0097367//carbohydrate derivative binding	GO:0006002//fructose 6-phosphate metabolic process;GO:0006047//UDP-N-acetylglucosamine metabolic process;GO:0006048//UDP-N-acetylglucosamine biosynthetic process;GO:0006487//protein N-linked glycosylation;GO:0006541//glutamine metabolic process;GO:1990830//cellular response to leukemia inhibitory factor
MSTRG.30141.1	Sfur004784	0.993547099	6.23E-05	Gfpt2	Glutamine--fructose-6-phosphate aminotransferase [isomerizing] 2	Metabolism;Metabolism;Human Diseases;Metabolism	Global and overview maps;Carbohydrate metabolism;Endocrine and metabolic diseases;Amino acid metabolism	ko01100//Metabolic pathways;ko00520//Amino sugar and nucleotide sugar metabolism;ko04931//Insulin resistance;ko00250//Alanine, aspartate and glutamate metabolism	K00820;K00820;K00820;K00820	-	GO:0004360//glutamine-fructose-6-phosphate transaminase (isomerizing) activity;GO:0097367//carbohydrate derivative binding	GO:0006002//fructose 6-phosphate metabolic process;GO:0006047//UDP-N-acetylglucosamine metabolic process;GO:0006048//UDP-N-acetylglucosamine biosynthetic process;GO:0006487//protein N-linked glycosylation;GO:0006541//glutamine metabolic process;GO:1990830//cellular response to leukemia inhibitory factor
MSTRG.33545.2	Sfur004784	0.95289481	0.003276088	Gfpt2	Glutamine--fructose-6-phosphate aminotransferase [isomerizing] 2	Metabolism;Metabolism;Human Diseases;Metabolism	Global and overview maps;Carbohydrate metabolism;Endocrine and metabolic diseases;Amino acid metabolism	ko01100//Metabolic pathways;ko00520//Amino sugar and nucleotide sugar metabolism;ko04931//Insulin resistance;ko00250//Alanine, aspartate and glutamate metabolism	K00820;K00820;K00820;K00820	-	GO:0004360//glutamine-fructose-6-phosphate transaminase (isomerizing) activity;GO:0097367//carbohydrate derivative binding	GO:0006002//fructose 6-phosphate metabolic process;GO:0006047//UDP-N-acetylglucosamine metabolic process;GO:0006048//UDP-N-acetylglucosamine biosynthetic process;GO:0006487//protein N-linked glycosylation;GO:0006541//glutamine metabolic process;GO:1990830//cellular response to leukemia inhibitory factor
MSTRG.36147.1	Sfur004784	0.978465637	0.0006906	Gfpt2	Glutamine--fructose-6-phosphate aminotransferase [isomerizing] 2	Metabolism;Metabolism;Human Diseases;Metabolism	Global and overview maps;Carbohydrate metabolism;Endocrine and metabolic diseases;Amino acid metabolism	ko01100//Metabolic pathways;ko00520//Amino sugar and nucleotide sugar metabolism;ko04931//Insulin resistance;ko00250//Alanine, aspartate and glutamate metabolism	K00820;K00820;K00820;K00820	-	GO:0004360//glutamine-fructose-6-phosphate transaminase (isomerizing) activity;GO:0097367//carbohydrate derivative binding	GO:0006002//fructose 6-phosphate metabolic process;GO:0006047//UDP-N-acetylglucosamine metabolic process;GO:0006048//UDP-N-acetylglucosamine biosynthetic process;GO:0006487//protein N-linked glycosylation;GO:0006541//glutamine metabolic process;GO:1990830//cellular response to leukemia inhibitory factor
MSTRG.39982.1	Sfur004784	0.976919255	0.000792933	Gfpt2	Glutamine--fructose-6-phosphate aminotransferase [isomerizing] 2	Metabolism;Metabolism;Human Diseases;Metabolism	Global and overview maps;Carbohydrate metabolism;Endocrine and metabolic diseases;Amino acid metabolism	ko01100//Metabolic pathways;ko00520//Amino sugar and nucleotide sugar metabolism;ko04931//Insulin resistance;ko00250//Alanine, aspartate and glutamate metabolism	K00820;K00820;K00820;K00820	-	GO:0004360//glutamine-fructose-6-phosphate transaminase (isomerizing) activity;GO:0097367//carbohydrate derivative binding	GO:0006002//fructose 6-phosphate metabolic process;GO:0006047//UDP-N-acetylglucosamine metabolic process;GO:0006048//UDP-N-acetylglucosamine biosynthetic process;GO:0006487//protein N-linked glycosylation;GO:0006541//glutamine metabolic process;GO:1990830//cellular response to leukemia inhibitory factor
MSTRG.30685.1	Sfur004784	0.966009536	0.001713392	Gfpt2	Glutamine--fructose-6-phosphate aminotransferase [isomerizing] 2	Metabolism;Metabolism;Human Diseases;Metabolism	Global and overview maps;Carbohydrate metabolism;Endocrine and metabolic diseases;Amino acid metabolism	ko01100//Metabolic pathways;ko00520//Amino sugar and nucleotide sugar metabolism;ko04931//Insulin resistance;ko00250//Alanine, aspartate and glutamate metabolism	K00820;K00820;K00820;K00820	-	GO:0004360//glutamine-fructose-6-phosphate transaminase (isomerizing) activity;GO:0097367//carbohydrate derivative binding	GO:0006002//fructose 6-phosphate metabolic process;GO:0006047//UDP-N-acetylglucosamine metabolic process;GO:0006048//UDP-N-acetylglucosamine biosynthetic process;GO:0006487//protein N-linked glycosylation;GO:0006541//glutamine metabolic process;GO:1990830//cellular response to leukemia inhibitory factor
MSTRG.9698.2	Sfur004784	0.979188004	0.000645202	Gfpt2	Glutamine--fructose-6-phosphate aminotransferase [isomerizing] 2	Metabolism;Metabolism;Human Diseases;Metabolism	Global and overview maps;Carbohydrate metabolism;Endocrine and metabolic diseases;Amino acid metabolism	ko01100//Metabolic pathways;ko00520//Amino sugar and nucleotide sugar metabolism;ko04931//Insulin resistance;ko00250//Alanine, aspartate and glutamate metabolism	K00820;K00820;K00820;K00820	-	GO:0004360//glutamine-fructose-6-phosphate transaminase (isomerizing) activity;GO:0097367//carbohydrate derivative binding	GO:0006002//fructose 6-phosphate metabolic process;GO:0006047//UDP-N-acetylglucosamine metabolic process;GO:0006048//UDP-N-acetylglucosamine biosynthetic process;GO:0006487//protein N-linked glycosylation;GO:0006541//glutamine metabolic process;GO:1990830//cellular response to leukemia inhibitory factor
MSTRG.1725.5	Sfur004784	0.962355076	0.002099036	Gfpt2	Glutamine--fructose-6-phosphate aminotransferase [isomerizing] 2	Metabolism;Metabolism;Human Diseases;Metabolism	Global and overview maps;Carbohydrate metabolism;Endocrine and metabolic diseases;Amino acid metabolism	ko01100//Metabolic pathways;ko00520//Amino sugar and nucleotide sugar metabolism;ko04931//Insulin resistance;ko00250//Alanine, aspartate and glutamate metabolism	K00820;K00820;K00820;K00820	-	GO:0004360//glutamine-fructose-6-phosphate transaminase (isomerizing) activity;GO:0097367//carbohydrate derivative binding	GO:0006002//fructose 6-phosphate metabolic process;GO:0006047//UDP-N-acetylglucosamine metabolic process;GO:0006048//UDP-N-acetylglucosamine biosynthetic process;GO:0006487//protein N-linked glycosylation;GO:0006541//glutamine metabolic process;GO:1990830//cellular response to leukemia inhibitory factor
MSTRG.11198.1	Sfur004784	0.985734157	0.00030382	Gfpt2	Glutamine--fructose-6-phosphate aminotransferase [isomerizing] 2	Metabolism;Metabolism;Human Diseases;Metabolism	Global and overview maps;Carbohydrate metabolism;Endocrine and metabolic diseases;Amino acid metabolism	ko01100//Metabolic pathways;ko00520//Amino sugar and nucleotide sugar metabolism;ko04931//Insulin resistance;ko00250//Alanine, aspartate and glutamate metabolism	K00820;K00820;K00820;K00820	-	GO:0004360//glutamine-fructose-6-phosphate transaminase (isomerizing) activity;GO:0097367//carbohydrate derivative binding	GO:0006002//fructose 6-phosphate metabolic process;GO:0006047//UDP-N-acetylglucosamine metabolic process;GO:0006048//UDP-N-acetylglucosamine biosynthetic process;GO:0006487//protein N-linked glycosylation;GO:0006541//glutamine metabolic process;GO:1990830//cellular response to leukemia inhibitory factor
MSTRG.21272.1	Sfur004784	-0.969130225	0.001414706	Gfpt2	Glutamine--fructose-6-phosphate aminotransferase [isomerizing] 2	Metabolism;Metabolism;Human Diseases;Metabolism	Global and overview maps;Carbohydrate metabolism;Endocrine and metabolic diseases;Amino acid metabolism	ko01100//Metabolic pathways;ko00520//Amino sugar and nucleotide sugar metabolism;ko04931//Insulin resistance;ko00250//Alanine, aspartate and glutamate metabolism	K00820;K00820;K00820;K00820	-	GO:0004360//glutamine-fructose-6-phosphate transaminase (isomerizing) activity;GO:0097367//carbohydrate derivative binding	GO:0006002//fructose 6-phosphate metabolic process;GO:0006047//UDP-N-acetylglucosamine metabolic process;GO:0006048//UDP-N-acetylglucosamine biosynthetic process;GO:0006487//protein N-linked glycosylation;GO:0006541//glutamine metabolic process;GO:1990830//cellular response to leukemia inhibitory factor
MSTRG.36087.1	Sfur004784	-0.986691524	0.000264495	Gfpt2	Glutamine--fructose-6-phosphate aminotransferase [isomerizing] 2	Metabolism;Metabolism;Human Diseases;Metabolism	Global and overview maps;Carbohydrate metabolism;Endocrine and metabolic diseases;Amino acid metabolism	ko01100//Metabolic pathways;ko00520//Amino sugar and nucleotide sugar metabolism;ko04931//Insulin resistance;ko00250//Alanine, aspartate and glutamate metabolism	K00820;K00820;K00820;K00820	-	GO:0004360//glutamine-fructose-6-phosphate transaminase (isomerizing) activity;GO:0097367//carbohydrate derivative binding	GO:0006002//fructose 6-phosphate metabolic process;GO:0006047//UDP-N-acetylglucosamine metabolic process;GO:0006048//UDP-N-acetylglucosamine biosynthetic process;GO:0006487//protein N-linked glycosylation;GO:0006541//glutamine metabolic process;GO:1990830//cellular response to leukemia inhibitory factor
MSTRG.23511.1	Sfur004784	0.975330141	0.000905396	Gfpt2	Glutamine--fructose-6-phosphate aminotransferase [isomerizing] 2	Metabolism;Metabolism;Human Diseases;Metabolism	Global and overview maps;Carbohydrate metabolism;Endocrine and metabolic diseases;Amino acid metabolism	ko01100//Metabolic pathways;ko00520//Amino sugar and nucleotide sugar metabolism;ko04931//Insulin resistance;ko00250//Alanine, aspartate and glutamate metabolism	K00820;K00820;K00820;K00820	-	GO:0004360//glutamine-fructose-6-phosphate transaminase (isomerizing) activity;GO:0097367//carbohydrate derivative binding	GO:0006002//fructose 6-phosphate metabolic process;GO:0006047//UDP-N-acetylglucosamine metabolic process;GO:0006048//UDP-N-acetylglucosamine biosynthetic process;GO:0006487//protein N-linked glycosylation;GO:0006541//glutamine metabolic process;GO:1990830//cellular response to leukemia inhibitory factor
MSTRG.32478.1	Sfur004784	0.986277259	0.000281178	Gfpt2	Glutamine--fructose-6-phosphate aminotransferase [isomerizing] 2	Metabolism;Metabolism;Human Diseases;Metabolism	Global and overview maps;Carbohydrate metabolism;Endocrine and metabolic diseases;Amino acid metabolism	ko01100//Metabolic pathways;ko00520//Amino sugar and nucleotide sugar metabolism;ko04931//Insulin resistance;ko00250//Alanine, aspartate and glutamate metabolism	K00820;K00820;K00820;K00820	-	GO:0004360//glutamine-fructose-6-phosphate transaminase (isomerizing) activity;GO:0097367//carbohydrate derivative binding	GO:0006002//fructose 6-phosphate metabolic process;GO:0006047//UDP-N-acetylglucosamine metabolic process;GO:0006048//UDP-N-acetylglucosamine biosynthetic process;GO:0006487//protein N-linked glycosylation;GO:0006541//glutamine metabolic process;GO:1990830//cellular response to leukemia inhibitory factor
MSTRG.34229.1	Sfur004784	-0.951337124	0.003494495	Gfpt2	Glutamine--fructose-6-phosphate aminotransferase [isomerizing] 2	Metabolism;Metabolism;Human Diseases;Metabolism	Global and overview maps;Carbohydrate metabolism;Endocrine and metabolic diseases;Amino acid metabolism	ko01100//Metabolic pathways;ko00520//Amino sugar and nucleotide sugar metabolism;ko04931//Insulin resistance;ko00250//Alanine, aspartate and glutamate metabolism	K00820;K00820;K00820;K00820	-	GO:0004360//glutamine-fructose-6-phosphate transaminase (isomerizing) activity;GO:0097367//carbohydrate derivative binding	GO:0006002//fructose 6-phosphate metabolic process;GO:0006047//UDP-N-acetylglucosamine metabolic process;GO:0006048//UDP-N-acetylglucosamine biosynthetic process;GO:0006487//protein N-linked glycosylation;GO:0006541//glutamine metabolic process;GO:1990830//cellular response to leukemia inhibitory factor
MSTRG.19842.1	Sfur004784	0.987922844	0.000217906	Gfpt2	Glutamine--fructose-6-phosphate aminotransferase [isomerizing] 2	Metabolism;Metabolism;Human Diseases;Metabolism	Global and overview maps;Carbohydrate metabolism;Endocrine and metabolic diseases;Amino acid metabolism	ko01100//Metabolic pathways;ko00520//Amino sugar and nucleotide sugar metabolism;ko04931//Insulin resistance;ko00250//Alanine, aspartate and glutamate metabolism	K00820;K00820;K00820;K00820	-	GO:0004360//glutamine-fructose-6-phosphate transaminase (isomerizing) activity;GO:0097367//carbohydrate derivative binding	GO:0006002//fructose 6-phosphate metabolic process;GO:0006047//UDP-N-acetylglucosamine metabolic process;GO:0006048//UDP-N-acetylglucosamine biosynthetic process;GO:0006487//protein N-linked glycosylation;GO:0006541//glutamine metabolic process;GO:1990830//cellular response to leukemia inhibitory factor
MSTRG.17864.1	Sfur004784	0.968492822	0.001473415	Gfpt2	Glutamine--fructose-6-phosphate aminotransferase [isomerizing] 2	Metabolism;Metabolism;Human Diseases;Metabolism	Global and overview maps;Carbohydrate metabolism;Endocrine and metabolic diseases;Amino acid metabolism	ko01100//Metabolic pathways;ko00520//Amino sugar and nucleotide sugar metabolism;ko04931//Insulin resistance;ko00250//Alanine, aspartate and glutamate metabolism	K00820;K00820;K00820;K00820	-	GO:0004360//glutamine-fructose-6-phosphate transaminase (isomerizing) activity;GO:0097367//carbohydrate derivative binding	GO:0006002//fructose 6-phosphate metabolic process;GO:0006047//UDP-N-acetylglucosamine metabolic process;GO:0006048//UDP-N-acetylglucosamine biosynthetic process;GO:0006487//protein N-linked glycosylation;GO:0006541//glutamine metabolic process;GO:1990830//cellular response to leukemia inhibitory factor
MSTRG.8569.4	Sfur004784	-0.99036176	0.000138896	Gfpt2	Glutamine--fructose-6-phosphate aminotransferase [isomerizing] 2	Metabolism;Metabolism;Human Diseases;Metabolism	Global and overview maps;Carbohydrate metabolism;Endocrine and metabolic diseases;Amino acid metabolism	ko01100//Metabolic pathways;ko00520//Amino sugar and nucleotide sugar metabolism;ko04931//Insulin resistance;ko00250//Alanine, aspartate and glutamate metabolism	K00820;K00820;K00820;K00820	-	GO:0004360//glutamine-fructose-6-phosphate transaminase (isomerizing) activity;GO:0097367//carbohydrate derivative binding	GO:0006002//fructose 6-phosphate metabolic process;GO:0006047//UDP-N-acetylglucosamine metabolic process;GO:0006048//UDP-N-acetylglucosamine biosynthetic process;GO:0006487//protein N-linked glycosylation;GO:0006541//glutamine metabolic process;GO:1990830//cellular response to leukemia inhibitory factor
MSTRG.22069.1	Sfur004784	0.973741806	0.001025187	Gfpt2	Glutamine--fructose-6-phosphate aminotransferase [isomerizing] 2	Metabolism;Metabolism;Human Diseases;Metabolism	Global and overview maps;Carbohydrate metabolism;Endocrine and metabolic diseases;Amino acid metabolism	ko01100//Metabolic pathways;ko00520//Amino sugar and nucleotide sugar metabolism;ko04931//Insulin resistance;ko00250//Alanine, aspartate and glutamate metabolism	K00820;K00820;K00820;K00820	-	GO:0004360//glutamine-fructose-6-phosphate transaminase (isomerizing) activity;GO:0097367//carbohydrate derivative binding	GO:0006002//fructose 6-phosphate metabolic process;GO:0006047//UDP-N-acetylglucosamine metabolic process;GO:0006048//UDP-N-acetylglucosamine biosynthetic process;GO:0006487//protein N-linked glycosylation;GO:0006541//glutamine metabolic process;GO:1990830//cellular response to leukemia inhibitory factor
MSTRG.26632.1	Sfur004784	0.98885236	0.000185712	Gfpt2	Glutamine--fructose-6-phosphate aminotransferase [isomerizing] 2	Metabolism;Metabolism;Human Diseases;Metabolism	Global and overview maps;Carbohydrate metabolism;Endocrine and metabolic diseases;Amino acid metabolism	ko01100//Metabolic pathways;ko00520//Amino sugar and nucleotide sugar metabolism;ko04931//Insulin resistance;ko00250//Alanine, aspartate and glutamate metabolism	K00820;K00820;K00820;K00820	-	GO:0004360//glutamine-fructose-6-phosphate transaminase (isomerizing) activity;GO:0097367//carbohydrate derivative binding	GO:0006002//fructose 6-phosphate metabolic process;GO:0006047//UDP-N-acetylglucosamine metabolic process;GO:0006048//UDP-N-acetylglucosamine biosynthetic process;GO:0006487//protein N-linked glycosylation;GO:0006541//glutamine metabolic process;GO:1990830//cellular response to leukemia inhibitory factor
MSTRG.13231.2	Sfur004784	0.958417929	0.002557654	Gfpt2	Glutamine--fructose-6-phosphate aminotransferase [isomerizing] 2	Metabolism;Metabolism;Human Diseases;Metabolism	Global and overview maps;Carbohydrate metabolism;Endocrine and metabolic diseases;Amino acid metabolism	ko01100//Metabolic pathways;ko00520//Amino sugar and nucleotide sugar metabolism;ko04931//Insulin resistance;ko00250//Alanine, aspartate and glutamate metabolism	K00820;K00820;K00820;K00820	-	GO:0004360//glutamine-fructose-6-phosphate transaminase (isomerizing) activity;GO:0097367//carbohydrate derivative binding	GO:0006002//fructose 6-phosphate metabolic process;GO:0006047//UDP-N-acetylglucosamine metabolic process;GO:0006048//UDP-N-acetylglucosamine biosynthetic process;GO:0006487//protein N-linked glycosylation;GO:0006541//glutamine metabolic process;GO:1990830//cellular response to leukemia inhibitory factor
MSTRG.12406.1	Sfur004784	0.97072423	0.00127306	Gfpt2	Glutamine--fructose-6-phosphate aminotransferase [isomerizing] 2	Metabolism;Metabolism;Human Diseases;Metabolism	Global and overview maps;Carbohydrate metabolism;Endocrine and metabolic diseases;Amino acid metabolism	ko01100//Metabolic pathways;ko00520//Amino sugar and nucleotide sugar metabolism;ko04931//Insulin resistance;ko00250//Alanine, aspartate and glutamate metabolism	K00820;K00820;K00820;K00820	-	GO:0004360//glutamine-fructose-6-phosphate transaminase (isomerizing) activity;GO:0097367//carbohydrate derivative binding	GO:0006002//fructose 6-phosphate metabolic process;GO:0006047//UDP-N-acetylglucosamine metabolic process;GO:0006048//UDP-N-acetylglucosamine biosynthetic process;GO:0006487//protein N-linked glycosylation;GO:0006541//glutamine metabolic process;GO:1990830//cellular response to leukemia inhibitory factor
MSTRG.7675.1	Sfur004784	0.986635362	0.000266727	Gfpt2	Glutamine--fructose-6-phosphate aminotransferase [isomerizing] 2	Metabolism;Metabolism;Human Diseases;Metabolism	Global and overview maps;Carbohydrate metabolism;Endocrine and metabolic diseases;Amino acid metabolism	ko01100//Metabolic pathways;ko00520//Amino sugar and nucleotide sugar metabolism;ko04931//Insulin resistance;ko00250//Alanine, aspartate and glutamate metabolism	K00820;K00820;K00820;K00820	-	GO:0004360//glutamine-fructose-6-phosphate transaminase (isomerizing) activity;GO:0097367//carbohydrate derivative binding	GO:0006002//fructose 6-phosphate metabolic process;GO:0006047//UDP-N-acetylglucosamine metabolic process;GO:0006048//UDP-N-acetylglucosamine biosynthetic process;GO:0006487//protein N-linked glycosylation;GO:0006541//glutamine metabolic process;GO:1990830//cellular response to leukemia inhibitory factor
MSTRG.34863.1	Sfur004784	0.986600128	0.000268132	Gfpt2	Glutamine--fructose-6-phosphate aminotransferase [isomerizing] 2	Metabolism;Metabolism;Human Diseases;Metabolism	Global and overview maps;Carbohydrate metabolism;Endocrine and metabolic diseases;Amino acid metabolism	ko01100//Metabolic pathways;ko00520//Amino sugar and nucleotide sugar metabolism;ko04931//Insulin resistance;ko00250//Alanine, aspartate and glutamate metabolism	K00820;K00820;K00820;K00820	-	GO:0004360//glutamine-fructose-6-phosphate transaminase (isomerizing) activity;GO:0097367//carbohydrate derivative binding	GO:0006002//fructose 6-phosphate metabolic process;GO:0006047//UDP-N-acetylglucosamine metabolic process;GO:0006048//UDP-N-acetylglucosamine biosynthetic process;GO:0006487//protein N-linked glycosylation;GO:0006541//glutamine metabolic process;GO:1990830//cellular response to leukemia inhibitory factor
MSTRG.33855.2	Sfur004784	-0.994928902	3.85E-05	Gfpt2	Glutamine--fructose-6-phosphate aminotransferase [isomerizing] 2	Metabolism;Metabolism;Human Diseases;Metabolism	Global and overview maps;Carbohydrate metabolism;Endocrine and metabolic diseases;Amino acid metabolism	ko01100//Metabolic pathways;ko00520//Amino sugar and nucleotide sugar metabolism;ko04931//Insulin resistance;ko00250//Alanine, aspartate and glutamate metabolism	K00820;K00820;K00820;K00820	-	GO:0004360//glutamine-fructose-6-phosphate transaminase (isomerizing) activity;GO:0097367//carbohydrate derivative binding	GO:0006002//fructose 6-phosphate metabolic process;GO:0006047//UDP-N-acetylglucosamine metabolic process;GO:0006048//UDP-N-acetylglucosamine biosynthetic process;GO:0006487//protein N-linked glycosylation;GO:0006541//glutamine metabolic process;GO:1990830//cellular response to leukemia inhibitory factor
MSTRG.7857.2	Sfur004784	0.963589947	0.001964404	Gfpt2	Glutamine--fructose-6-phosphate aminotransferase [isomerizing] 2	Metabolism;Metabolism;Human Diseases;Metabolism	Global and overview maps;Carbohydrate metabolism;Endocrine and metabolic diseases;Amino acid metabolism	ko01100//Metabolic pathways;ko00520//Amino sugar and nucleotide sugar metabolism;ko04931//Insulin resistance;ko00250//Alanine, aspartate and glutamate metabolism	K00820;K00820;K00820;K00820	-	GO:0004360//glutamine-fructose-6-phosphate transaminase (isomerizing) activity;GO:0097367//carbohydrate derivative binding	GO:0006002//fructose 6-phosphate metabolic process;GO:0006047//UDP-N-acetylglucosamine metabolic process;GO:0006048//UDP-N-acetylglucosamine biosynthetic process;GO:0006487//protein N-linked glycosylation;GO:0006541//glutamine metabolic process;GO:1990830//cellular response to leukemia inhibitory factor
MSTRG.13227.1	Sfur004784	0.993151353	7.02E-05	Gfpt2	Glutamine--fructose-6-phosphate aminotransferase [isomerizing] 2	Metabolism;Metabolism;Human Diseases;Metabolism	Global and overview maps;Carbohydrate metabolism;Endocrine and metabolic diseases;Amino acid metabolism	ko01100//Metabolic pathways;ko00520//Amino sugar and nucleotide sugar metabolism;ko04931//Insulin resistance;ko00250//Alanine, aspartate and glutamate metabolism	K00820;K00820;K00820;K00820	-	GO:0004360//glutamine-fructose-6-phosphate transaminase (isomerizing) activity;GO:0097367//carbohydrate derivative binding	GO:0006002//fructose 6-phosphate metabolic process;GO:0006047//UDP-N-acetylglucosamine metabolic process;GO:0006048//UDP-N-acetylglucosamine biosynthetic process;GO:0006487//protein N-linked glycosylation;GO:0006541//glutamine metabolic process;GO:1990830//cellular response to leukemia inhibitory factor
MSTRG.33709.1	Sfur004784	0.95638275	0.002812207	Gfpt2	Glutamine--fructose-6-phosphate aminotransferase [isomerizing] 2	Metabolism;Metabolism;Human Diseases;Metabolism	Global and overview maps;Carbohydrate metabolism;Endocrine and metabolic diseases;Amino acid metabolism	ko01100//Metabolic pathways;ko00520//Amino sugar and nucleotide sugar metabolism;ko04931//Insulin resistance;ko00250//Alanine, aspartate and glutamate metabolism	K00820;K00820;K00820;K00820	-	GO:0004360//glutamine-fructose-6-phosphate transaminase (isomerizing) activity;GO:0097367//carbohydrate derivative binding	GO:0006002//fructose 6-phosphate metabolic process;GO:0006047//UDP-N-acetylglucosamine metabolic process;GO:0006048//UDP-N-acetylglucosamine biosynthetic process;GO:0006487//protein N-linked glycosylation;GO:0006541//glutamine metabolic process;GO:1990830//cellular response to leukemia inhibitory factor
MSTRG.36247.1	Sfur004784	0.953297836	0.003220707	Gfpt2	Glutamine--fructose-6-phosphate aminotransferase [isomerizing] 2	Metabolism;Metabolism;Human Diseases;Metabolism	Global and overview maps;Carbohydrate metabolism;Endocrine and metabolic diseases;Amino acid metabolism	ko01100//Metabolic pathways;ko00520//Amino sugar and nucleotide sugar metabolism;ko04931//Insulin resistance;ko00250//Alanine, aspartate and glutamate metabolism	K00820;K00820;K00820;K00820	-	GO:0004360//glutamine-fructose-6-phosphate transaminase (isomerizing) activity;GO:0097367//carbohydrate derivative binding	GO:0006002//fructose 6-phosphate metabolic process;GO:0006047//UDP-N-acetylglucosamine metabolic process;GO:0006048//UDP-N-acetylglucosamine biosynthetic process;GO:0006487//protein N-linked glycosylation;GO:0006541//glutamine metabolic process;GO:1990830//cellular response to leukemia inhibitory factor
MSTRG.1716.1	Sfur004784	-0.976231852	0.000840674	Gfpt2	Glutamine--fructose-6-phosphate aminotransferase [isomerizing] 2	Metabolism;Metabolism;Human Diseases;Metabolism	Global and overview maps;Carbohydrate metabolism;Endocrine and metabolic diseases;Amino acid metabolism	ko01100//Metabolic pathways;ko00520//Amino sugar and nucleotide sugar metabolism;ko04931//Insulin resistance;ko00250//Alanine, aspartate and glutamate metabolism	K00820;K00820;K00820;K00820	-	GO:0004360//glutamine-fructose-6-phosphate transaminase (isomerizing) activity;GO:0097367//carbohydrate derivative binding	GO:0006002//fructose 6-phosphate metabolic process;GO:0006047//UDP-N-acetylglucosamine metabolic process;GO:0006048//UDP-N-acetylglucosamine biosynthetic process;GO:0006487//protein N-linked glycosylation;GO:0006541//glutamine metabolic process;GO:1990830//cellular response to leukemia inhibitory factor
MSTRG.24265.1	Sfur004784	0.988427632	0.000200105	Gfpt2	Glutamine--fructose-6-phosphate aminotransferase [isomerizing] 2	Metabolism;Metabolism;Human Diseases;Metabolism	Global and overview maps;Carbohydrate metabolism;Endocrine and metabolic diseases;Amino acid metabolism	ko01100//Metabolic pathways;ko00520//Amino sugar and nucleotide sugar metabolism;ko04931//Insulin resistance;ko00250//Alanine, aspartate and glutamate metabolism	K00820;K00820;K00820;K00820	-	GO:0004360//glutamine-fructose-6-phosphate transaminase (isomerizing) activity;GO:0097367//carbohydrate derivative binding	GO:0006002//fructose 6-phosphate metabolic process;GO:0006047//UDP-N-acetylglucosamine metabolic process;GO:0006048//UDP-N-acetylglucosamine biosynthetic process;GO:0006487//protein N-linked glycosylation;GO:0006541//glutamine metabolic process;GO:1990830//cellular response to leukemia inhibitory factor
MSTRG.29845.1	Sfur004784	0.970392512	0.001301928	Gfpt2	Glutamine--fructose-6-phosphate aminotransferase [isomerizing] 2	Metabolism;Metabolism;Human Diseases;Metabolism	Global and overview maps;Carbohydrate metabolism;Endocrine and metabolic diseases;Amino acid metabolism	ko01100//Metabolic pathways;ko00520//Amino sugar and nucleotide sugar metabolism;ko04931//Insulin resistance;ko00250//Alanine, aspartate and glutamate metabolism	K00820;K00820;K00820;K00820	-	GO:0004360//glutamine-fructose-6-phosphate transaminase (isomerizing) activity;GO:0097367//carbohydrate derivative binding	GO:0006002//fructose 6-phosphate metabolic process;GO:0006047//UDP-N-acetylglucosamine metabolic process;GO:0006048//UDP-N-acetylglucosamine biosynthetic process;GO:0006487//protein N-linked glycosylation;GO:0006541//glutamine metabolic process;GO:1990830//cellular response to leukemia inhibitory factor
MSTRG.31005.1	Sfur004784	-0.985570528	0.000310812	Gfpt2	Glutamine--fructose-6-phosphate aminotransferase [isomerizing] 2	Metabolism;Metabolism;Human Diseases;Metabolism	Global and overview maps;Carbohydrate metabolism;Endocrine and metabolic diseases;Amino acid metabolism	ko01100//Metabolic pathways;ko00520//Amino sugar and nucleotide sugar metabolism;ko04931//Insulin resistance;ko00250//Alanine, aspartate and glutamate metabolism	K00820;K00820;K00820;K00820	-	GO:0004360//glutamine-fructose-6-phosphate transaminase (isomerizing) activity;GO:0097367//carbohydrate derivative binding	GO:0006002//fructose 6-phosphate metabolic process;GO:0006047//UDP-N-acetylglucosamine metabolic process;GO:0006048//UDP-N-acetylglucosamine biosynthetic process;GO:0006487//protein N-linked glycosylation;GO:0006541//glutamine metabolic process;GO:1990830//cellular response to leukemia inhibitory factor
MSTRG.23863.1	Sfur004784	-0.987758607	0.00022386	Gfpt2	Glutamine--fructose-6-phosphate aminotransferase [isomerizing] 2	Metabolism;Metabolism;Human Diseases;Metabolism	Global and overview maps;Carbohydrate metabolism;Endocrine and metabolic diseases;Amino acid metabolism	ko01100//Metabolic pathways;ko00520//Amino sugar and nucleotide sugar metabolism;ko04931//Insulin resistance;ko00250//Alanine, aspartate and glutamate metabolism	K00820;K00820;K00820;K00820	-	GO:0004360//glutamine-fructose-6-phosphate transaminase (isomerizing) activity;GO:0097367//carbohydrate derivative binding	GO:0006002//fructose 6-phosphate metabolic process;GO:0006047//UDP-N-acetylglucosamine metabolic process;GO:0006048//UDP-N-acetylglucosamine biosynthetic process;GO:0006487//protein N-linked glycosylation;GO:0006541//glutamine metabolic process;GO:1990830//cellular response to leukemia inhibitory factor
MSTRG.11947.1	Sfur004784	0.968986543	0.001427837	Gfpt2	Glutamine--fructose-6-phosphate aminotransferase [isomerizing] 2	Metabolism;Metabolism;Human Diseases;Metabolism	Global and overview maps;Carbohydrate metabolism;Endocrine and metabolic diseases;Amino acid metabolism	ko01100//Metabolic pathways;ko00520//Amino sugar and nucleotide sugar metabolism;ko04931//Insulin resistance;ko00250//Alanine, aspartate and glutamate metabolism	K00820;K00820;K00820;K00820	-	GO:0004360//glutamine-fructose-6-phosphate transaminase (isomerizing) activity;GO:0097367//carbohydrate derivative binding	GO:0006002//fructose 6-phosphate metabolic process;GO:0006047//UDP-N-acetylglucosamine metabolic process;GO:0006048//UDP-N-acetylglucosamine biosynthetic process;GO:0006487//protein N-linked glycosylation;GO:0006541//glutamine metabolic process;GO:1990830//cellular response to leukemia inhibitory factor
MSTRG.18635.5	Sfur004784	-0.977953141	0.000723738	Gfpt2	Glutamine--fructose-6-phosphate aminotransferase [isomerizing] 2	Metabolism;Metabolism;Human Diseases;Metabolism	Global and overview maps;Carbohydrate metabolism;Endocrine and metabolic diseases;Amino acid metabolism	ko01100//Metabolic pathways;ko00520//Amino sugar and nucleotide sugar metabolism;ko04931//Insulin resistance;ko00250//Alanine, aspartate and glutamate metabolism	K00820;K00820;K00820;K00820	-	GO:0004360//glutamine-fructose-6-phosphate transaminase (isomerizing) activity;GO:0097367//carbohydrate derivative binding	GO:0006002//fructose 6-phosphate metabolic process;GO:0006047//UDP-N-acetylglucosamine metabolic process;GO:0006048//UDP-N-acetylglucosamine biosynthetic process;GO:0006487//protein N-linked glycosylation;GO:0006541//glutamine metabolic process;GO:1990830//cellular response to leukemia inhibitory factor
MSTRG.37149.1	Sfur004784	0.994484578	4.55E-05	Gfpt2	Glutamine--fructose-6-phosphate aminotransferase [isomerizing] 2	Metabolism;Metabolism;Human Diseases;Metabolism	Global and overview maps;Carbohydrate metabolism;Endocrine and metabolic diseases;Amino acid metabolism	ko01100//Metabolic pathways;ko00520//Amino sugar and nucleotide sugar metabolism;ko04931//Insulin resistance;ko00250//Alanine, aspartate and glutamate metabolism	K00820;K00820;K00820;K00820	-	GO:0004360//glutamine-fructose-6-phosphate transaminase (isomerizing) activity;GO:0097367//carbohydrate derivative binding	GO:0006002//fructose 6-phosphate metabolic process;GO:0006047//UDP-N-acetylglucosamine metabolic process;GO:0006048//UDP-N-acetylglucosamine biosynthetic process;GO:0006487//protein N-linked glycosylation;GO:0006541//glutamine metabolic process;GO:1990830//cellular response to leukemia inhibitory factor
MSTRG.34108.2	Sfur004784	0.956789223	0.002760416	Gfpt2	Glutamine--fructose-6-phosphate aminotransferase [isomerizing] 2	Metabolism;Metabolism;Human Diseases;Metabolism	Global and overview maps;Carbohydrate metabolism;Endocrine and metabolic diseases;Amino acid metabolism	ko01100//Metabolic pathways;ko00520//Amino sugar and nucleotide sugar metabolism;ko04931//Insulin resistance;ko00250//Alanine, aspartate and glutamate metabolism	K00820;K00820;K00820;K00820	-	GO:0004360//glutamine-fructose-6-phosphate transaminase (isomerizing) activity;GO:0097367//carbohydrate derivative binding	GO:0006002//fructose 6-phosphate metabolic process;GO:0006047//UDP-N-acetylglucosamine metabolic process;GO:0006048//UDP-N-acetylglucosamine biosynthetic process;GO:0006487//protein N-linked glycosylation;GO:0006541//glutamine metabolic process;GO:1990830//cellular response to leukemia inhibitory factor
MSTRG.17970.1	Sfur004784	0.963703195	0.001952277	Gfpt2	Glutamine--fructose-6-phosphate aminotransferase [isomerizing] 2	Metabolism;Metabolism;Human Diseases;Metabolism	Global and overview maps;Carbohydrate metabolism;Endocrine and metabolic diseases;Amino acid metabolism	ko01100//Metabolic pathways;ko00520//Amino sugar and nucleotide sugar metabolism;ko04931//Insulin resistance;ko00250//Alanine, aspartate and glutamate metabolism	K00820;K00820;K00820;K00820	-	GO:0004360//glutamine-fructose-6-phosphate transaminase (isomerizing) activity;GO:0097367//carbohydrate derivative binding	GO:0006002//fructose 6-phosphate metabolic process;GO:0006047//UDP-N-acetylglucosamine metabolic process;GO:0006048//UDP-N-acetylglucosamine biosynthetic process;GO:0006487//protein N-linked glycosylation;GO:0006541//glutamine metabolic process;GO:1990830//cellular response to leukemia inhibitory factor
MSTRG.370.1	Sfur004784	0.957657982	0.002651313	Gfpt2	Glutamine--fructose-6-phosphate aminotransferase [isomerizing] 2	Metabolism;Metabolism;Human Diseases;Metabolism	Global and overview maps;Carbohydrate metabolism;Endocrine and metabolic diseases;Amino acid metabolism	ko01100//Metabolic pathways;ko00520//Amino sugar and nucleotide sugar metabolism;ko04931//Insulin resistance;ko00250//Alanine, aspartate and glutamate metabolism	K00820;K00820;K00820;K00820	-	GO:0004360//glutamine-fructose-6-phosphate transaminase (isomerizing) activity;GO:0097367//carbohydrate derivative binding	GO:0006002//fructose 6-phosphate metabolic process;GO:0006047//UDP-N-acetylglucosamine metabolic process;GO:0006048//UDP-N-acetylglucosamine biosynthetic process;GO:0006487//protein N-linked glycosylation;GO:0006541//glutamine metabolic process;GO:1990830//cellular response to leukemia inhibitory factor
MSTRG.11373.1	Sfur004784	0.981613645	0.000503979	Gfpt2	Glutamine--fructose-6-phosphate aminotransferase [isomerizing] 2	Metabolism;Metabolism;Human Diseases;Metabolism	Global and overview maps;Carbohydrate metabolism;Endocrine and metabolic diseases;Amino acid metabolism	ko01100//Metabolic pathways;ko00520//Amino sugar and nucleotide sugar metabolism;ko04931//Insulin resistance;ko00250//Alanine, aspartate and glutamate metabolism	K00820;K00820;K00820;K00820	-	GO:0004360//glutamine-fructose-6-phosphate transaminase (isomerizing) activity;GO:0097367//carbohydrate derivative binding	GO:0006002//fructose 6-phosphate metabolic process;GO:0006047//UDP-N-acetylglucosamine metabolic process;GO:0006048//UDP-N-acetylglucosamine biosynthetic process;GO:0006487//protein N-linked glycosylation;GO:0006541//glutamine metabolic process;GO:1990830//cellular response to leukemia inhibitory factor
MSTRG.13398.2	Sfur004784	0.986954988	0.000254149	Gfpt2	Glutamine--fructose-6-phosphate aminotransferase [isomerizing] 2	Metabolism;Metabolism;Human Diseases;Metabolism	Global and overview maps;Carbohydrate metabolism;Endocrine and metabolic diseases;Amino acid metabolism	ko01100//Metabolic pathways;ko00520//Amino sugar and nucleotide sugar metabolism;ko04931//Insulin resistance;ko00250//Alanine, aspartate and glutamate metabolism	K00820;K00820;K00820;K00820	-	GO:0004360//glutamine-fructose-6-phosphate transaminase (isomerizing) activity;GO:0097367//carbohydrate derivative binding	GO:0006002//fructose 6-phosphate metabolic process;GO:0006047//UDP-N-acetylglucosamine metabolic process;GO:0006048//UDP-N-acetylglucosamine biosynthetic process;GO:0006487//protein N-linked glycosylation;GO:0006541//glutamine metabolic process;GO:1990830//cellular response to leukemia inhibitory factor
MSTRG.14134.1	Sfur004784	-0.974242919	0.000986597	Gfpt2	Glutamine--fructose-6-phosphate aminotransferase [isomerizing] 2	Metabolism;Metabolism;Human Diseases;Metabolism	Global and overview maps;Carbohydrate metabolism;Endocrine and metabolic diseases;Amino acid metabolism	ko01100//Metabolic pathways;ko00520//Amino sugar and nucleotide sugar metabolism;ko04931//Insulin resistance;ko00250//Alanine, aspartate and glutamate metabolism	K00820;K00820;K00820;K00820	-	GO:0004360//glutamine-fructose-6-phosphate transaminase (isomerizing) activity;GO:0097367//carbohydrate derivative binding	GO:0006002//fructose 6-phosphate metabolic process;GO:0006047//UDP-N-acetylglucosamine metabolic process;GO:0006048//UDP-N-acetylglucosamine biosynthetic process;GO:0006487//protein N-linked glycosylation;GO:0006541//glutamine metabolic process;GO:1990830//cellular response to leukemia inhibitory factor
MSTRG.15684.1	Sfur004784	-0.987391775	0.000237449	Gfpt2	Glutamine--fructose-6-phosphate aminotransferase [isomerizing] 2	Metabolism;Metabolism;Human Diseases;Metabolism	Global and overview maps;Carbohydrate metabolism;Endocrine and metabolic diseases;Amino acid metabolism	ko01100//Metabolic pathways;ko00520//Amino sugar and nucleotide sugar metabolism;ko04931//Insulin resistance;ko00250//Alanine, aspartate and glutamate metabolism	K00820;K00820;K00820;K00820	-	GO:0004360//glutamine-fructose-6-phosphate transaminase (isomerizing) activity;GO:0097367//carbohydrate derivative binding	GO:0006002//fructose 6-phosphate metabolic process;GO:0006047//UDP-N-acetylglucosamine metabolic process;GO:0006048//UDP-N-acetylglucosamine biosynthetic process;GO:0006487//protein N-linked glycosylation;GO:0006541//glutamine metabolic process;GO:1990830//cellular response to leukemia inhibitory factor
MSTRG.11223.4	Sfur004784	0.962878362	0.002041447	Gfpt2	Glutamine--fructose-6-phosphate aminotransferase [isomerizing] 2	Metabolism;Metabolism;Human Diseases;Metabolism	Global and overview maps;Carbohydrate metabolism;Endocrine and metabolic diseases;Amino acid metabolism	ko01100//Metabolic pathways;ko00520//Amino sugar and nucleotide sugar metabolism;ko04931//Insulin resistance;ko00250//Alanine, aspartate and glutamate metabolism	K00820;K00820;K00820;K00820	-	GO:0004360//glutamine-fructose-6-phosphate transaminase (isomerizing) activity;GO:0097367//carbohydrate derivative binding	GO:0006002//fructose 6-phosphate metabolic process;GO:0006047//UDP-N-acetylglucosamine metabolic process;GO:0006048//UDP-N-acetylglucosamine biosynthetic process;GO:0006487//protein N-linked glycosylation;GO:0006541//glutamine metabolic process;GO:1990830//cellular response to leukemia inhibitory factor
MSTRG.31911.1	Sfur004784	0.953083917	0.003250044	Gfpt2	Glutamine--fructose-6-phosphate aminotransferase [isomerizing] 2	Metabolism;Metabolism;Human Diseases;Metabolism	Global and overview maps;Carbohydrate metabolism;Endocrine and metabolic diseases;Amino acid metabolism	ko01100//Metabolic pathways;ko00520//Amino sugar and nucleotide sugar metabolism;ko04931//Insulin resistance;ko00250//Alanine, aspartate and glutamate metabolism	K00820;K00820;K00820;K00820	-	GO:0004360//glutamine-fructose-6-phosphate transaminase (isomerizing) activity;GO:0097367//carbohydrate derivative binding	GO:0006002//fructose 6-phosphate metabolic process;GO:0006047//UDP-N-acetylglucosamine metabolic process;GO:0006048//UDP-N-acetylglucosamine biosynthetic process;GO:0006487//protein N-linked glycosylation;GO:0006541//glutamine metabolic process;GO:1990830//cellular response to leukemia inhibitory factor
MSTRG.11349.1	Sfur004784	-0.983474232	0.000407395	Gfpt2	Glutamine--fructose-6-phosphate aminotransferase [isomerizing] 2	Metabolism;Metabolism;Human Diseases;Metabolism	Global and overview maps;Carbohydrate metabolism;Endocrine and metabolic diseases;Amino acid metabolism	ko01100//Metabolic pathways;ko00520//Amino sugar and nucleotide sugar metabolism;ko04931//Insulin resistance;ko00250//Alanine, aspartate and glutamate metabolism	K00820;K00820;K00820;K00820	-	GO:0004360//glutamine-fructose-6-phosphate transaminase (isomerizing) activity;GO:0097367//carbohydrate derivative binding	GO:0006002//fructose 6-phosphate metabolic process;GO:0006047//UDP-N-acetylglucosamine metabolic process;GO:0006048//UDP-N-acetylglucosamine biosynthetic process;GO:0006487//protein N-linked glycosylation;GO:0006541//glutamine metabolic process;GO:1990830//cellular response to leukemia inhibitory factor
MSTRG.32770.1	Sfur004784	-0.95428422	0.003087127	Gfpt2	Glutamine--fructose-6-phosphate aminotransferase [isomerizing] 2	Metabolism;Metabolism;Human Diseases;Metabolism	Global and overview maps;Carbohydrate metabolism;Endocrine and metabolic diseases;Amino acid metabolism	ko01100//Metabolic pathways;ko00520//Amino sugar and nucleotide sugar metabolism;ko04931//Insulin resistance;ko00250//Alanine, aspartate and glutamate metabolism	K00820;K00820;K00820;K00820	-	GO:0004360//glutamine-fructose-6-phosphate transaminase (isomerizing) activity;GO:0097367//carbohydrate derivative binding	GO:0006002//fructose 6-phosphate metabolic process;GO:0006047//UDP-N-acetylglucosamine metabolic process;GO:0006048//UDP-N-acetylglucosamine biosynthetic process;GO:0006487//protein N-linked glycosylation;GO:0006541//glutamine metabolic process;GO:1990830//cellular response to leukemia inhibitory factor
MSTRG.35256.1	Sfur004784	0.984050204	0.000379565	Gfpt2	Glutamine--fructose-6-phosphate aminotransferase [isomerizing] 2	Metabolism;Metabolism;Human Diseases;Metabolism	Global and overview maps;Carbohydrate metabolism;Endocrine and metabolic diseases;Amino acid metabolism	ko01100//Metabolic pathways;ko00520//Amino sugar and nucleotide sugar metabolism;ko04931//Insulin resistance;ko00250//Alanine, aspartate and glutamate metabolism	K00820;K00820;K00820;K00820	-	GO:0004360//glutamine-fructose-6-phosphate transaminase (isomerizing) activity;GO:0097367//carbohydrate derivative binding	GO:0006002//fructose 6-phosphate metabolic process;GO:0006047//UDP-N-acetylglucosamine metabolic process;GO:0006048//UDP-N-acetylglucosamine biosynthetic process;GO:0006487//protein N-linked glycosylation;GO:0006541//glutamine metabolic process;GO:1990830//cellular response to leukemia inhibitory factor
MSTRG.36368.1	Sfur004784	0.963948962	0.001926089	Gfpt2	Glutamine--fructose-6-phosphate aminotransferase [isomerizing] 2	Metabolism;Metabolism;Human Diseases;Metabolism	Global and overview maps;Carbohydrate metabolism;Endocrine and metabolic diseases;Amino acid metabolism	ko01100//Metabolic pathways;ko00520//Amino sugar and nucleotide sugar metabolism;ko04931//Insulin resistance;ko00250//Alanine, aspartate and glutamate metabolism	K00820;K00820;K00820;K00820	-	GO:0004360//glutamine-fructose-6-phosphate transaminase (isomerizing) activity;GO:0097367//carbohydrate derivative binding	GO:0006002//fructose 6-phosphate metabolic process;GO:0006047//UDP-N-acetylglucosamine metabolic process;GO:0006048//UDP-N-acetylglucosamine biosynthetic process;GO:0006487//protein N-linked glycosylation;GO:0006541//glutamine metabolic process;GO:1990830//cellular response to leukemia inhibitory factor
MSTRG.2446.2	Sfur004784	-0.960256536	0.002337926	Gfpt2	Glutamine--fructose-6-phosphate aminotransferase [isomerizing] 2	Metabolism;Metabolism;Human Diseases;Metabolism	Global and overview maps;Carbohydrate metabolism;Endocrine and metabolic diseases;Amino acid metabolism	ko01100//Metabolic pathways;ko00520//Amino sugar and nucleotide sugar metabolism;ko04931//Insulin resistance;ko00250//Alanine, aspartate and glutamate metabolism	K00820;K00820;K00820;K00820	-	GO:0004360//glutamine-fructose-6-phosphate transaminase (isomerizing) activity;GO:0097367//carbohydrate derivative binding	GO:0006002//fructose 6-phosphate metabolic process;GO:0006047//UDP-N-acetylglucosamine metabolic process;GO:0006048//UDP-N-acetylglucosamine biosynthetic process;GO:0006487//protein N-linked glycosylation;GO:0006541//glutamine metabolic process;GO:1990830//cellular response to leukemia inhibitory factor
MSTRG.34874.1	Sfur004784	-0.953366567	0.003211309	Gfpt2	Glutamine--fructose-6-phosphate aminotransferase [isomerizing] 2	Metabolism;Metabolism;Human Diseases;Metabolism	Global and overview maps;Carbohydrate metabolism;Endocrine and metabolic diseases;Amino acid metabolism	ko01100//Metabolic pathways;ko00520//Amino sugar and nucleotide sugar metabolism;ko04931//Insulin resistance;ko00250//Alanine, aspartate and glutamate metabolism	K00820;K00820;K00820;K00820	-	GO:0004360//glutamine-fructose-6-phosphate transaminase (isomerizing) activity;GO:0097367//carbohydrate derivative binding	GO:0006002//fructose 6-phosphate metabolic process;GO:0006047//UDP-N-acetylglucosamine metabolic process;GO:0006048//UDP-N-acetylglucosamine biosynthetic process;GO:0006487//protein N-linked glycosylation;GO:0006541//glutamine metabolic process;GO:1990830//cellular response to leukemia inhibitory factor
MSTRG.15726.1	Sfur004784	-0.963219328	0.002004348	Gfpt2	Glutamine--fructose-6-phosphate aminotransferase [isomerizing] 2	Metabolism;Metabolism;Human Diseases;Metabolism	Global and overview maps;Carbohydrate metabolism;Endocrine and metabolic diseases;Amino acid metabolism	ko01100//Metabolic pathways;ko00520//Amino sugar and nucleotide sugar metabolism;ko04931//Insulin resistance;ko00250//Alanine, aspartate and glutamate metabolism	K00820;K00820;K00820;K00820	-	GO:0004360//glutamine-fructose-6-phosphate transaminase (isomerizing) activity;GO:0097367//carbohydrate derivative binding	GO:0006002//fructose 6-phosphate metabolic process;GO:0006047//UDP-N-acetylglucosamine metabolic process;GO:0006048//UDP-N-acetylglucosamine biosynthetic process;GO:0006487//protein N-linked glycosylation;GO:0006541//glutamine metabolic process;GO:1990830//cellular response to leukemia inhibitory factor
MSTRG.23058.1	Sfur004784	0.971332349	0.001220971	Gfpt2	Glutamine--fructose-6-phosphate aminotransferase [isomerizing] 2	Metabolism;Metabolism;Human Diseases;Metabolism	Global and overview maps;Carbohydrate metabolism;Endocrine and metabolic diseases;Amino acid metabolism	ko01100//Metabolic pathways;ko00520//Amino sugar and nucleotide sugar metabolism;ko04931//Insulin resistance;ko00250//Alanine, aspartate and glutamate metabolism	K00820;K00820;K00820;K00820	-	GO:0004360//glutamine-fructose-6-phosphate transaminase (isomerizing) activity;GO:0097367//carbohydrate derivative binding	GO:0006002//fructose 6-phosphate metabolic process;GO:0006047//UDP-N-acetylglucosamine metabolic process;GO:0006048//UDP-N-acetylglucosamine biosynthetic process;GO:0006487//protein N-linked glycosylation;GO:0006541//glutamine metabolic process;GO:1990830//cellular response to leukemia inhibitory factor
MSTRG.32265.2	Sfur004784	0.965394709	0.001775569	Gfpt2	Glutamine--fructose-6-phosphate aminotransferase [isomerizing] 2	Metabolism;Metabolism;Human Diseases;Metabolism	Global and overview maps;Carbohydrate metabolism;Endocrine and metabolic diseases;Amino acid metabolism	ko01100//Metabolic pathways;ko00520//Amino sugar and nucleotide sugar metabolism;ko04931//Insulin resistance;ko00250//Alanine, aspartate and glutamate metabolism	K00820;K00820;K00820;K00820	-	GO:0004360//glutamine-fructose-6-phosphate transaminase (isomerizing) activity;GO:0097367//carbohydrate derivative binding	GO:0006002//fructose 6-phosphate metabolic process;GO:0006047//UDP-N-acetylglucosamine metabolic process;GO:0006048//UDP-N-acetylglucosamine biosynthetic process;GO:0006487//protein N-linked glycosylation;GO:0006541//glutamine metabolic process;GO:1990830//cellular response to leukemia inhibitory factor
MSTRG.2075.2	Sfur004784	0.984969369	0.000337182	Gfpt2	Glutamine--fructose-6-phosphate aminotransferase [isomerizing] 2	Metabolism;Metabolism;Human Diseases;Metabolism	Global and overview maps;Carbohydrate metabolism;Endocrine and metabolic diseases;Amino acid metabolism	ko01100//Metabolic pathways;ko00520//Amino sugar and nucleotide sugar metabolism;ko04931//Insulin resistance;ko00250//Alanine, aspartate and glutamate metabolism	K00820;K00820;K00820;K00820	-	GO:0004360//glutamine-fructose-6-phosphate transaminase (isomerizing) activity;GO:0097367//carbohydrate derivative binding	GO:0006002//fructose 6-phosphate metabolic process;GO:0006047//UDP-N-acetylglucosamine metabolic process;GO:0006048//UDP-N-acetylglucosamine biosynthetic process;GO:0006487//protein N-linked glycosylation;GO:0006541//glutamine metabolic process;GO:1990830//cellular response to leukemia inhibitory factor
MSTRG.20495.1	Sfur004784	0.959725003	0.002400448	Gfpt2	Glutamine--fructose-6-phosphate aminotransferase [isomerizing] 2	Metabolism;Metabolism;Human Diseases;Metabolism	Global and overview maps;Carbohydrate metabolism;Endocrine and metabolic diseases;Amino acid metabolism	ko01100//Metabolic pathways;ko00520//Amino sugar and nucleotide sugar metabolism;ko04931//Insulin resistance;ko00250//Alanine, aspartate and glutamate metabolism	K00820;K00820;K00820;K00820	-	GO:0004360//glutamine-fructose-6-phosphate transaminase (isomerizing) activity;GO:0097367//carbohydrate derivative binding	GO:0006002//fructose 6-phosphate metabolic process;GO:0006047//UDP-N-acetylglucosamine metabolic process;GO:0006048//UDP-N-acetylglucosamine biosynthetic process;GO:0006487//protein N-linked glycosylation;GO:0006541//glutamine metabolic process;GO:1990830//cellular response to leukemia inhibitory factor
MSTRG.25635.1	Sfur004784	-0.965109249	0.001804809	Gfpt2	Glutamine--fructose-6-phosphate aminotransferase [isomerizing] 2	Metabolism;Metabolism;Human Diseases;Metabolism	Global and overview maps;Carbohydrate metabolism;Endocrine and metabolic diseases;Amino acid metabolism	ko01100//Metabolic pathways;ko00520//Amino sugar and nucleotide sugar metabolism;ko04931//Insulin resistance;ko00250//Alanine, aspartate and glutamate metabolism	K00820;K00820;K00820;K00820	-	GO:0004360//glutamine-fructose-6-phosphate transaminase (isomerizing) activity;GO:0097367//carbohydrate derivative binding	GO:0006002//fructose 6-phosphate metabolic process;GO:0006047//UDP-N-acetylglucosamine metabolic process;GO:0006048//UDP-N-acetylglucosamine biosynthetic process;GO:0006487//protein N-linked glycosylation;GO:0006541//glutamine metabolic process;GO:1990830//cellular response to leukemia inhibitory factor
MSTRG.6886.1	Sfur004784	0.977689107	0.000741111	Gfpt2	Glutamine--fructose-6-phosphate aminotransferase [isomerizing] 2	Metabolism;Metabolism;Human Diseases;Metabolism	Global and overview maps;Carbohydrate metabolism;Endocrine and metabolic diseases;Amino acid metabolism	ko01100//Metabolic pathways;ko00520//Amino sugar and nucleotide sugar metabolism;ko04931//Insulin resistance;ko00250//Alanine, aspartate and glutamate metabolism	K00820;K00820;K00820;K00820	-	GO:0004360//glutamine-fructose-6-phosphate transaminase (isomerizing) activity;GO:0097367//carbohydrate derivative binding	GO:0006002//fructose 6-phosphate metabolic process;GO:0006047//UDP-N-acetylglucosamine metabolic process;GO:0006048//UDP-N-acetylglucosamine biosynthetic process;GO:0006487//protein N-linked glycosylation;GO:0006541//glutamine metabolic process;GO:1990830//cellular response to leukemia inhibitory factor
MSTRG.28591.1	Sfur004784	-0.959817191	0.002389546	Gfpt2	Glutamine--fructose-6-phosphate aminotransferase [isomerizing] 2	Metabolism;Metabolism;Human Diseases;Metabolism	Global and overview maps;Carbohydrate metabolism;Endocrine and metabolic diseases;Amino acid metabolism	ko01100//Metabolic pathways;ko00520//Amino sugar and nucleotide sugar metabolism;ko04931//Insulin resistance;ko00250//Alanine, aspartate and glutamate metabolism	K00820;K00820;K00820;K00820	-	GO:0004360//glutamine-fructose-6-phosphate transaminase (isomerizing) activity;GO:0097367//carbohydrate derivative binding	GO:0006002//fructose 6-phosphate metabolic process;GO:0006047//UDP-N-acetylglucosamine metabolic process;GO:0006048//UDP-N-acetylglucosamine biosynthetic process;GO:0006487//protein N-linked glycosylation;GO:0006541//glutamine metabolic process;GO:1990830//cellular response to leukemia inhibitory factor
MSTRG.33771.1	Sfur004784	-0.991147438	0.000117205	Gfpt2	Glutamine--fructose-6-phosphate aminotransferase [isomerizing] 2	Metabolism;Metabolism;Human Diseases;Metabolism	Global and overview maps;Carbohydrate metabolism;Endocrine and metabolic diseases;Amino acid metabolism	ko01100//Metabolic pathways;ko00520//Amino sugar and nucleotide sugar metabolism;ko04931//Insulin resistance;ko00250//Alanine, aspartate and glutamate metabolism	K00820;K00820;K00820;K00820	-	GO:0004360//glutamine-fructose-6-phosphate transaminase (isomerizing) activity;GO:0097367//carbohydrate derivative binding	GO:0006002//fructose 6-phosphate metabolic process;GO:0006047//UDP-N-acetylglucosamine metabolic process;GO:0006048//UDP-N-acetylglucosamine biosynthetic process;GO:0006487//protein N-linked glycosylation;GO:0006541//glutamine metabolic process;GO:1990830//cellular response to leukemia inhibitory factor
MSTRG.5073.1	Sfur004784	-0.985143875	0.000329417	Gfpt2	Glutamine--fructose-6-phosphate aminotransferase [isomerizing] 2	Metabolism;Metabolism;Human Diseases;Metabolism	Global and overview maps;Carbohydrate metabolism;Endocrine and metabolic diseases;Amino acid metabolism	ko01100//Metabolic pathways;ko00520//Amino sugar and nucleotide sugar metabolism;ko04931//Insulin resistance;ko00250//Alanine, aspartate and glutamate metabolism	K00820;K00820;K00820;K00820	-	GO:0004360//glutamine-fructose-6-phosphate transaminase (isomerizing) activity;GO:0097367//carbohydrate derivative binding	GO:0006002//fructose 6-phosphate metabolic process;GO:0006047//UDP-N-acetylglucosamine metabolic process;GO:0006048//UDP-N-acetylglucosamine biosynthetic process;GO:0006487//protein N-linked glycosylation;GO:0006541//glutamine metabolic process;GO:1990830//cellular response to leukemia inhibitory factor
MSTRG.27716.2	Sfur004784	-0.970028082	0.001334012	Gfpt2	Glutamine--fructose-6-phosphate aminotransferase [isomerizing] 2	Metabolism;Metabolism;Human Diseases;Metabolism	Global and overview maps;Carbohydrate metabolism;Endocrine and metabolic diseases;Amino acid metabolism	ko01100//Metabolic pathways;ko00520//Amino sugar and nucleotide sugar metabolism;ko04931//Insulin resistance;ko00250//Alanine, aspartate and glutamate metabolism	K00820;K00820;K00820;K00820	-	GO:0004360//glutamine-fructose-6-phosphate transaminase (isomerizing) activity;GO:0097367//carbohydrate derivative binding	GO:0006002//fructose 6-phosphate metabolic process;GO:0006047//UDP-N-acetylglucosamine metabolic process;GO:0006048//UDP-N-acetylglucosamine biosynthetic process;GO:0006487//protein N-linked glycosylation;GO:0006541//glutamine metabolic process;GO:1990830//cellular response to leukemia inhibitory factor
MSTRG.39924.1	Sfur004784	-0.981788042	0.000494493	Gfpt2	Glutamine--fructose-6-phosphate aminotransferase [isomerizing] 2	Metabolism;Metabolism;Human Diseases;Metabolism	Global and overview maps;Carbohydrate metabolism;Endocrine and metabolic diseases;Amino acid metabolism	ko01100//Metabolic pathways;ko00520//Amino sugar and nucleotide sugar metabolism;ko04931//Insulin resistance;ko00250//Alanine, aspartate and glutamate metabolism	K00820;K00820;K00820;K00820	-	GO:0004360//glutamine-fructose-6-phosphate transaminase (isomerizing) activity;GO:0097367//carbohydrate derivative binding	GO:0006002//fructose 6-phosphate metabolic process;GO:0006047//UDP-N-acetylglucosamine metabolic process;GO:0006048//UDP-N-acetylglucosamine biosynthetic process;GO:0006487//protein N-linked glycosylation;GO:0006541//glutamine metabolic process;GO:1990830//cellular response to leukemia inhibitory factor
MSTRG.19038.1	Sfur004784	0.967504988	0.001566733	Gfpt2	Glutamine--fructose-6-phosphate aminotransferase [isomerizing] 2	Metabolism;Metabolism;Human Diseases;Metabolism	Global and overview maps;Carbohydrate metabolism;Endocrine and metabolic diseases;Amino acid metabolism	ko01100//Metabolic pathways;ko00520//Amino sugar and nucleotide sugar metabolism;ko04931//Insulin resistance;ko00250//Alanine, aspartate and glutamate metabolism	K00820;K00820;K00820;K00820	-	GO:0004360//glutamine-fructose-6-phosphate transaminase (isomerizing) activity;GO:0097367//carbohydrate derivative binding	GO:0006002//fructose 6-phosphate metabolic process;GO:0006047//UDP-N-acetylglucosamine metabolic process;GO:0006048//UDP-N-acetylglucosamine biosynthetic process;GO:0006487//protein N-linked glycosylation;GO:0006541//glutamine metabolic process;GO:1990830//cellular response to leukemia inhibitory factor
MSTRG.25634.1	Sfur004784	-0.986511783	0.000271671	Gfpt2	Glutamine--fructose-6-phosphate aminotransferase [isomerizing] 2	Metabolism;Metabolism;Human Diseases;Metabolism	Global and overview maps;Carbohydrate metabolism;Endocrine and metabolic diseases;Amino acid metabolism	ko01100//Metabolic pathways;ko00520//Amino sugar and nucleotide sugar metabolism;ko04931//Insulin resistance;ko00250//Alanine, aspartate and glutamate metabolism	K00820;K00820;K00820;K00820	-	GO:0004360//glutamine-fructose-6-phosphate transaminase (isomerizing) activity;GO:0097367//carbohydrate derivative binding	GO:0006002//fructose 6-phosphate metabolic process;GO:0006047//UDP-N-acetylglucosamine metabolic process;GO:0006048//UDP-N-acetylglucosamine biosynthetic process;GO:0006487//protein N-linked glycosylation;GO:0006541//glutamine metabolic process;GO:1990830//cellular response to leukemia inhibitory factor
MSTRG.32766.1	Sfur004784	-0.994149553	5.12E-05	Gfpt2	Glutamine--fructose-6-phosphate aminotransferase [isomerizing] 2	Metabolism;Metabolism;Human Diseases;Metabolism	Global and overview maps;Carbohydrate metabolism;Endocrine and metabolic diseases;Amino acid metabolism	ko01100//Metabolic pathways;ko00520//Amino sugar and nucleotide sugar metabolism;ko04931//Insulin resistance;ko00250//Alanine, aspartate and glutamate metabolism	K00820;K00820;K00820;K00820	-	GO:0004360//glutamine-fructose-6-phosphate transaminase (isomerizing) activity;GO:0097367//carbohydrate derivative binding	GO:0006002//fructose 6-phosphate metabolic process;GO:0006047//UDP-N-acetylglucosamine metabolic process;GO:0006048//UDP-N-acetylglucosamine biosynthetic process;GO:0006487//protein N-linked glycosylation;GO:0006541//glutamine metabolic process;GO:1990830//cellular response to leukemia inhibitory factor
MSTRG.2861.1	Sfur004784	-0.969315611	0.001397852	Gfpt2	Glutamine--fructose-6-phosphate aminotransferase [isomerizing] 2	Metabolism;Metabolism;Human Diseases;Metabolism	Global and overview maps;Carbohydrate metabolism;Endocrine and metabolic diseases;Amino acid metabolism	ko01100//Metabolic pathways;ko00520//Amino sugar and nucleotide sugar metabolism;ko04931//Insulin resistance;ko00250//Alanine, aspartate and glutamate metabolism	K00820;K00820;K00820;K00820	-	GO:0004360//glutamine-fructose-6-phosphate transaminase (isomerizing) activity;GO:0097367//carbohydrate derivative binding	GO:0006002//fructose 6-phosphate metabolic process;GO:0006047//UDP-N-acetylglucosamine metabolic process;GO:0006048//UDP-N-acetylglucosamine biosynthetic process;GO:0006487//protein N-linked glycosylation;GO:0006541//glutamine metabolic process;GO:1990830//cellular response to leukemia inhibitory factor
MSTRG.5073.2	Sfur004784	-0.958823609	0.002508336	Gfpt2	Glutamine--fructose-6-phosphate aminotransferase [isomerizing] 2	Metabolism;Metabolism;Human Diseases;Metabolism	Global and overview maps;Carbohydrate metabolism;Endocrine and metabolic diseases;Amino acid metabolism	ko01100//Metabolic pathways;ko00520//Amino sugar and nucleotide sugar metabolism;ko04931//Insulin resistance;ko00250//Alanine, aspartate and glutamate metabolism	K00820;K00820;K00820;K00820	-	GO:0004360//glutamine-fructose-6-phosphate transaminase (isomerizing) activity;GO:0097367//carbohydrate derivative binding	GO:0006002//fructose 6-phosphate metabolic process;GO:0006047//UDP-N-acetylglucosamine metabolic process;GO:0006048//UDP-N-acetylglucosamine biosynthetic process;GO:0006487//protein N-linked glycosylation;GO:0006541//glutamine metabolic process;GO:1990830//cellular response to leukemia inhibitory factor
MSTRG.27823.1	Sfur004784	-0.985271398	0.0003238	Gfpt2	Glutamine--fructose-6-phosphate aminotransferase [isomerizing] 2	Metabolism;Metabolism;Human Diseases;Metabolism	Global and overview maps;Carbohydrate metabolism;Endocrine and metabolic diseases;Amino acid metabolism	ko01100//Metabolic pathways;ko00520//Amino sugar and nucleotide sugar metabolism;ko04931//Insulin resistance;ko00250//Alanine, aspartate and glutamate metabolism	K00820;K00820;K00820;K00820	-	GO:0004360//glutamine-fructose-6-phosphate transaminase (isomerizing) activity;GO:0097367//carbohydrate derivative binding	GO:0006002//fructose 6-phosphate metabolic process;GO:0006047//UDP-N-acetylglucosamine metabolic process;GO:0006048//UDP-N-acetylglucosamine biosynthetic process;GO:0006487//protein N-linked glycosylation;GO:0006541//glutamine metabolic process;GO:1990830//cellular response to leukemia inhibitory factor
MSTRG.10749.1	Sfur004784	-0.957120619	0.002718542	Gfpt2	Glutamine--fructose-6-phosphate aminotransferase [isomerizing] 2	Metabolism;Metabolism;Human Diseases;Metabolism	Global and overview maps;Carbohydrate metabolism;Endocrine and metabolic diseases;Amino acid metabolism	ko01100//Metabolic pathways;ko00520//Amino sugar and nucleotide sugar metabolism;ko04931//Insulin resistance;ko00250//Alanine, aspartate and glutamate metabolism	K00820;K00820;K00820;K00820	-	GO:0004360//glutamine-fructose-6-phosphate transaminase (isomerizing) activity;GO:0097367//carbohydrate derivative binding	GO:0006002//fructose 6-phosphate metabolic process;GO:0006047//UDP-N-acetylglucosamine metabolic process;GO:0006048//UDP-N-acetylglucosamine biosynthetic process;GO:0006487//protein N-linked glycosylation;GO:0006541//glutamine metabolic process;GO:1990830//cellular response to leukemia inhibitory factor
MSTRG.4220.1	Sfur004784	0.96452187	0.001865718	Gfpt2	Glutamine--fructose-6-phosphate aminotransferase [isomerizing] 2	Metabolism;Metabolism;Human Diseases;Metabolism	Global and overview maps;Carbohydrate metabolism;Endocrine and metabolic diseases;Amino acid metabolism	ko01100//Metabolic pathways;ko00520//Amino sugar and nucleotide sugar metabolism;ko04931//Insulin resistance;ko00250//Alanine, aspartate and glutamate metabolism	K00820;K00820;K00820;K00820	-	GO:0004360//glutamine-fructose-6-phosphate transaminase (isomerizing) activity;GO:0097367//carbohydrate derivative binding	GO:0006002//fructose 6-phosphate metabolic process;GO:0006047//UDP-N-acetylglucosamine metabolic process;GO:0006048//UDP-N-acetylglucosamine biosynthetic process;GO:0006487//protein N-linked glycosylation;GO:0006541//glutamine metabolic process;GO:1990830//cellular response to leukemia inhibitory factor
MSTRG.24262.1	Sfur004784	0.953644469	0.003173448	Gfpt2	Glutamine--fructose-6-phosphate aminotransferase [isomerizing] 2	Metabolism;Metabolism;Human Diseases;Metabolism	Global and overview maps;Carbohydrate metabolism;Endocrine and metabolic diseases;Amino acid metabolism	ko01100//Metabolic pathways;ko00520//Amino sugar and nucleotide sugar metabolism;ko04931//Insulin resistance;ko00250//Alanine, aspartate and glutamate metabolism	K00820;K00820;K00820;K00820	-	GO:0004360//glutamine-fructose-6-phosphate transaminase (isomerizing) activity;GO:0097367//carbohydrate derivative binding	GO:0006002//fructose 6-phosphate metabolic process;GO:0006047//UDP-N-acetylglucosamine metabolic process;GO:0006048//UDP-N-acetylglucosamine biosynthetic process;GO:0006487//protein N-linked glycosylation;GO:0006541//glutamine metabolic process;GO:1990830//cellular response to leukemia inhibitory factor
MSTRG.36079.1	Sfur004784	-0.995863688	2.56E-05	Gfpt2	Glutamine--fructose-6-phosphate aminotransferase [isomerizing] 2	Metabolism;Metabolism;Human Diseases;Metabolism	Global and overview maps;Carbohydrate metabolism;Endocrine and metabolic diseases;Amino acid metabolism	ko01100//Metabolic pathways;ko00520//Amino sugar and nucleotide sugar metabolism;ko04931//Insulin resistance;ko00250//Alanine, aspartate and glutamate metabolism	K00820;K00820;K00820;K00820	-	GO:0004360//glutamine-fructose-6-phosphate transaminase (isomerizing) activity;GO:0097367//carbohydrate derivative binding	GO:0006002//fructose 6-phosphate metabolic process;GO:0006047//UDP-N-acetylglucosamine metabolic process;GO:0006048//UDP-N-acetylglucosamine biosynthetic process;GO:0006487//protein N-linked glycosylation;GO:0006541//glutamine metabolic process;GO:1990830//cellular response to leukemia inhibitory factor
MSTRG.25629.14	Sfur004784	-0.974422649	0.000972935	Gfpt2	Glutamine--fructose-6-phosphate aminotransferase [isomerizing] 2	Metabolism;Metabolism;Human Diseases;Metabolism	Global and overview maps;Carbohydrate metabolism;Endocrine and metabolic diseases;Amino acid metabolism	ko01100//Metabolic pathways;ko00520//Amino sugar and nucleotide sugar metabolism;ko04931//Insulin resistance;ko00250//Alanine, aspartate and glutamate metabolism	K00820;K00820;K00820;K00820	-	GO:0004360//glutamine-fructose-6-phosphate transaminase (isomerizing) activity;GO:0097367//carbohydrate derivative binding	GO:0006002//fructose 6-phosphate metabolic process;GO:0006047//UDP-N-acetylglucosamine metabolic process;GO:0006048//UDP-N-acetylglucosamine biosynthetic process;GO:0006487//protein N-linked glycosylation;GO:0006541//glutamine metabolic process;GO:1990830//cellular response to leukemia inhibitory factor
MSTRG.23513.1	Sfur004784	0.954629637	0.003041008	Gfpt2	Glutamine--fructose-6-phosphate aminotransferase [isomerizing] 2	Metabolism;Metabolism;Human Diseases;Metabolism	Global and overview maps;Carbohydrate metabolism;Endocrine and metabolic diseases;Amino acid metabolism	ko01100//Metabolic pathways;ko00520//Amino sugar and nucleotide sugar metabolism;ko04931//Insulin resistance;ko00250//Alanine, aspartate and glutamate metabolism	K00820;K00820;K00820;K00820	-	GO:0004360//glutamine-fructose-6-phosphate transaminase (isomerizing) activity;GO:0097367//carbohydrate derivative binding	GO:0006002//fructose 6-phosphate metabolic process;GO:0006047//UDP-N-acetylglucosamine metabolic process;GO:0006048//UDP-N-acetylglucosamine biosynthetic process;GO:0006487//protein N-linked glycosylation;GO:0006541//glutamine metabolic process;GO:1990830//cellular response to leukemia inhibitory factor
MSTRG.21282.2	Sfur004784	-0.952397953	0.003345	Gfpt2	Glutamine--fructose-6-phosphate aminotransferase [isomerizing] 2	Metabolism;Metabolism;Human Diseases;Metabolism	Global and overview maps;Carbohydrate metabolism;Endocrine and metabolic diseases;Amino acid metabolism	ko01100//Metabolic pathways;ko00520//Amino sugar and nucleotide sugar metabolism;ko04931//Insulin resistance;ko00250//Alanine, aspartate and glutamate metabolism	K00820;K00820;K00820;K00820	-	GO:0004360//glutamine-fructose-6-phosphate transaminase (isomerizing) activity;GO:0097367//carbohydrate derivative binding	GO:0006002//fructose 6-phosphate metabolic process;GO:0006047//UDP-N-acetylglucosamine metabolic process;GO:0006048//UDP-N-acetylglucosamine biosynthetic process;GO:0006487//protein N-linked glycosylation;GO:0006541//glutamine metabolic process;GO:1990830//cellular response to leukemia inhibitory factor
MSTRG.17390.1	Sfur004784	-0.971838309	0.001178454	Gfpt2	Glutamine--fructose-6-phosphate aminotransferase [isomerizing] 2	Metabolism;Metabolism;Human Diseases;Metabolism	Global and overview maps;Carbohydrate metabolism;Endocrine and metabolic diseases;Amino acid metabolism	ko01100//Metabolic pathways;ko00520//Amino sugar and nucleotide sugar metabolism;ko04931//Insulin resistance;ko00250//Alanine, aspartate and glutamate metabolism	K00820;K00820;K00820;K00820	-	GO:0004360//glutamine-fructose-6-phosphate transaminase (isomerizing) activity;GO:0097367//carbohydrate derivative binding	GO:0006002//fructose 6-phosphate metabolic process;GO:0006047//UDP-N-acetylglucosamine metabolic process;GO:0006048//UDP-N-acetylglucosamine biosynthetic process;GO:0006487//protein N-linked glycosylation;GO:0006541//glutamine metabolic process;GO:1990830//cellular response to leukemia inhibitory factor
MSTRG.27226.1	Sfur004784	-0.965742649	0.001740247	Gfpt2	Glutamine--fructose-6-phosphate aminotransferase [isomerizing] 2	Metabolism;Metabolism;Human Diseases;Metabolism	Global and overview maps;Carbohydrate metabolism;Endocrine and metabolic diseases;Amino acid metabolism	ko01100//Metabolic pathways;ko00520//Amino sugar and nucleotide sugar metabolism;ko04931//Insulin resistance;ko00250//Alanine, aspartate and glutamate metabolism	K00820;K00820;K00820;K00820	-	GO:0004360//glutamine-fructose-6-phosphate transaminase (isomerizing) activity;GO:0097367//carbohydrate derivative binding	GO:0006002//fructose 6-phosphate metabolic process;GO:0006047//UDP-N-acetylglucosamine metabolic process;GO:0006048//UDP-N-acetylglucosamine biosynthetic process;GO:0006487//protein N-linked glycosylation;GO:0006541//glutamine metabolic process;GO:1990830//cellular response to leukemia inhibitory factor
MSTRG.1847.1	Sfur004784	0.959418025	0.002436928	Gfpt2	Glutamine--fructose-6-phosphate aminotransferase [isomerizing] 2	Metabolism;Metabolism;Human Diseases;Metabolism	Global and overview maps;Carbohydrate metabolism;Endocrine and metabolic diseases;Amino acid metabolism	ko01100//Metabolic pathways;ko00520//Amino sugar and nucleotide sugar metabolism;ko04931//Insulin resistance;ko00250//Alanine, aspartate and glutamate metabolism	K00820;K00820;K00820;K00820	-	GO:0004360//glutamine-fructose-6-phosphate transaminase (isomerizing) activity;GO:0097367//carbohydrate derivative binding	GO:0006002//fructose 6-phosphate metabolic process;GO:0006047//UDP-N-acetylglucosamine metabolic process;GO:0006048//UDP-N-acetylglucosamine biosynthetic process;GO:0006487//protein N-linked glycosylation;GO:0006541//glutamine metabolic process;GO:1990830//cellular response to leukemia inhibitory factor
MSTRG.20196.1	Sfur004784	-0.979388593	0.000632867	Gfpt2	Glutamine--fructose-6-phosphate aminotransferase [isomerizing] 2	Metabolism;Metabolism;Human Diseases;Metabolism	Global and overview maps;Carbohydrate metabolism;Endocrine and metabolic diseases;Amino acid metabolism	ko01100//Metabolic pathways;ko00520//Amino sugar and nucleotide sugar metabolism;ko04931//Insulin resistance;ko00250//Alanine, aspartate and glutamate metabolism	K00820;K00820;K00820;K00820	-	GO:0004360//glutamine-fructose-6-phosphate transaminase (isomerizing) activity;GO:0097367//carbohydrate derivative binding	GO:0006002//fructose 6-phosphate metabolic process;GO:0006047//UDP-N-acetylglucosamine metabolic process;GO:0006048//UDP-N-acetylglucosamine biosynthetic process;GO:0006487//protein N-linked glycosylation;GO:0006541//glutamine metabolic process;GO:1990830//cellular response to leukemia inhibitory factor
MSTRG.39026.1	Sfur004784	-0.971214767	0.001230959	Gfpt2	Glutamine--fructose-6-phosphate aminotransferase [isomerizing] 2	Metabolism;Metabolism;Human Diseases;Metabolism	Global and overview maps;Carbohydrate metabolism;Endocrine and metabolic diseases;Amino acid metabolism	ko01100//Metabolic pathways;ko00520//Amino sugar and nucleotide sugar metabolism;ko04931//Insulin resistance;ko00250//Alanine, aspartate and glutamate metabolism	K00820;K00820;K00820;K00820	-	GO:0004360//glutamine-fructose-6-phosphate transaminase (isomerizing) activity;GO:0097367//carbohydrate derivative binding	GO:0006002//fructose 6-phosphate metabolic process;GO:0006047//UDP-N-acetylglucosamine metabolic process;GO:0006048//UDP-N-acetylglucosamine biosynthetic process;GO:0006487//protein N-linked glycosylation;GO:0006541//glutamine metabolic process;GO:1990830//cellular response to leukemia inhibitory factor
MSTRG.24931.1	Sfur004784	-0.961172443	0.002232101	Gfpt2	Glutamine--fructose-6-phosphate aminotransferase [isomerizing] 2	Metabolism;Metabolism;Human Diseases;Metabolism	Global and overview maps;Carbohydrate metabolism;Endocrine and metabolic diseases;Amino acid metabolism	ko01100//Metabolic pathways;ko00520//Amino sugar and nucleotide sugar metabolism;ko04931//Insulin resistance;ko00250//Alanine, aspartate and glutamate metabolism	K00820;K00820;K00820;K00820	-	GO:0004360//glutamine-fructose-6-phosphate transaminase (isomerizing) activity;GO:0097367//carbohydrate derivative binding	GO:0006002//fructose 6-phosphate metabolic process;GO:0006047//UDP-N-acetylglucosamine metabolic process;GO:0006048//UDP-N-acetylglucosamine biosynthetic process;GO:0006487//protein N-linked glycosylation;GO:0006541//glutamine metabolic process;GO:1990830//cellular response to leukemia inhibitory factor
MSTRG.22908.1	Sfur004784	-0.984558975	0.000355797	Gfpt2	Glutamine--fructose-6-phosphate aminotransferase [isomerizing] 2	Metabolism;Metabolism;Human Diseases;Metabolism	Global and overview maps;Carbohydrate metabolism;Endocrine and metabolic diseases;Amino acid metabolism	ko01100//Metabolic pathways;ko00520//Amino sugar and nucleotide sugar metabolism;ko04931//Insulin resistance;ko00250//Alanine, aspartate and glutamate metabolism	K00820;K00820;K00820;K00820	-	GO:0004360//glutamine-fructose-6-phosphate transaminase (isomerizing) activity;GO:0097367//carbohydrate derivative binding	GO:0006002//fructose 6-phosphate metabolic process;GO:0006047//UDP-N-acetylglucosamine metabolic process;GO:0006048//UDP-N-acetylglucosamine biosynthetic process;GO:0006487//protein N-linked glycosylation;GO:0006541//glutamine metabolic process;GO:1990830//cellular response to leukemia inhibitory factor
MSTRG.24487.4	Sfur004784	0.966898997	0.001625381	Gfpt2	Glutamine--fructose-6-phosphate aminotransferase [isomerizing] 2	Metabolism;Metabolism;Human Diseases;Metabolism	Global and overview maps;Carbohydrate metabolism;Endocrine and metabolic diseases;Amino acid metabolism	ko01100//Metabolic pathways;ko00520//Amino sugar and nucleotide sugar metabolism;ko04931//Insulin resistance;ko00250//Alanine, aspartate and glutamate metabolism	K00820;K00820;K00820;K00820	-	GO:0004360//glutamine-fructose-6-phosphate transaminase (isomerizing) activity;GO:0097367//carbohydrate derivative binding	GO:0006002//fructose 6-phosphate metabolic process;GO:0006047//UDP-N-acetylglucosamine metabolic process;GO:0006048//UDP-N-acetylglucosamine biosynthetic process;GO:0006487//protein N-linked glycosylation;GO:0006541//glutamine metabolic process;GO:1990830//cellular response to leukemia inhibitory factor
MSTRG.38291.4	Sfur004784	-0.957383484	0.002685552	Gfpt2	Glutamine--fructose-6-phosphate aminotransferase [isomerizing] 2	Metabolism;Metabolism;Human Diseases;Metabolism	Global and overview maps;Carbohydrate metabolism;Endocrine and metabolic diseases;Amino acid metabolism	ko01100//Metabolic pathways;ko00520//Amino sugar and nucleotide sugar metabolism;ko04931//Insulin resistance;ko00250//Alanine, aspartate and glutamate metabolism	K00820;K00820;K00820;K00820	-	GO:0004360//glutamine-fructose-6-phosphate transaminase (isomerizing) activity;GO:0097367//carbohydrate derivative binding	GO:0006002//fructose 6-phosphate metabolic process;GO:0006047//UDP-N-acetylglucosamine metabolic process;GO:0006048//UDP-N-acetylglucosamine biosynthetic process;GO:0006487//protein N-linked glycosylation;GO:0006541//glutamine metabolic process;GO:1990830//cellular response to leukemia inhibitory factor
MSTRG.14662.2	Sfur004784	-0.963046276	0.002023135	Gfpt2	Glutamine--fructose-6-phosphate aminotransferase [isomerizing] 2	Metabolism;Metabolism;Human Diseases;Metabolism	Global and overview maps;Carbohydrate metabolism;Endocrine and metabolic diseases;Amino acid metabolism	ko01100//Metabolic pathways;ko00520//Amino sugar and nucleotide sugar metabolism;ko04931//Insulin resistance;ko00250//Alanine, aspartate and glutamate metabolism	K00820;K00820;K00820;K00820	-	GO:0004360//glutamine-fructose-6-phosphate transaminase (isomerizing) activity;GO:0097367//carbohydrate derivative binding	GO:0006002//fructose 6-phosphate metabolic process;GO:0006047//UDP-N-acetylglucosamine metabolic process;GO:0006048//UDP-N-acetylglucosamine biosynthetic process;GO:0006487//protein N-linked glycosylation;GO:0006541//glutamine metabolic process;GO:1990830//cellular response to leukemia inhibitory factor
MSTRG.21441.2	Sfur004784	-0.984937159	0.000338625	Gfpt2	Glutamine--fructose-6-phosphate aminotransferase [isomerizing] 2	Metabolism;Metabolism;Human Diseases;Metabolism	Global and overview maps;Carbohydrate metabolism;Endocrine and metabolic diseases;Amino acid metabolism	ko01100//Metabolic pathways;ko00520//Amino sugar and nucleotide sugar metabolism;ko04931//Insulin resistance;ko00250//Alanine, aspartate and glutamate metabolism	K00820;K00820;K00820;K00820	-	GO:0004360//glutamine-fructose-6-phosphate transaminase (isomerizing) activity;GO:0097367//carbohydrate derivative binding	GO:0006002//fructose 6-phosphate metabolic process;GO:0006047//UDP-N-acetylglucosamine metabolic process;GO:0006048//UDP-N-acetylglucosamine biosynthetic process;GO:0006487//protein N-linked glycosylation;GO:0006541//glutamine metabolic process;GO:1990830//cellular response to leukemia inhibitory factor
MSTRG.32361.3	Sfur004784	0.992875971	7.59E-05	Gfpt2	Glutamine--fructose-6-phosphate aminotransferase [isomerizing] 2	Metabolism;Metabolism;Human Diseases;Metabolism	Global and overview maps;Carbohydrate metabolism;Endocrine and metabolic diseases;Amino acid metabolism	ko01100//Metabolic pathways;ko00520//Amino sugar and nucleotide sugar metabolism;ko04931//Insulin resistance;ko00250//Alanine, aspartate and glutamate metabolism	K00820;K00820;K00820;K00820	-	GO:0004360//glutamine-fructose-6-phosphate transaminase (isomerizing) activity;GO:0097367//carbohydrate derivative binding	GO:0006002//fructose 6-phosphate metabolic process;GO:0006047//UDP-N-acetylglucosamine metabolic process;GO:0006048//UDP-N-acetylglucosamine biosynthetic process;GO:0006487//protein N-linked glycosylation;GO:0006541//glutamine metabolic process;GO:1990830//cellular response to leukemia inhibitory factor
MSTRG.30687.1	Sfur004784	0.95577423	0.002890627	Gfpt2	Glutamine--fructose-6-phosphate aminotransferase [isomerizing] 2	Metabolism;Metabolism;Human Diseases;Metabolism	Global and overview maps;Carbohydrate metabolism;Endocrine and metabolic diseases;Amino acid metabolism	ko01100//Metabolic pathways;ko00520//Amino sugar and nucleotide sugar metabolism;ko04931//Insulin resistance;ko00250//Alanine, aspartate and glutamate metabolism	K00820;K00820;K00820;K00820	-	GO:0004360//glutamine-fructose-6-phosphate transaminase (isomerizing) activity;GO:0097367//carbohydrate derivative binding	GO:0006002//fructose 6-phosphate metabolic process;GO:0006047//UDP-N-acetylglucosamine metabolic process;GO:0006048//UDP-N-acetylglucosamine biosynthetic process;GO:0006487//protein N-linked glycosylation;GO:0006541//glutamine metabolic process;GO:1990830//cellular response to leukemia inhibitory factor
MSTRG.14638.1	Sfur004784	0.96508504	0.0018073	Gfpt2	Glutamine--fructose-6-phosphate aminotransferase [isomerizing] 2	Metabolism;Metabolism;Human Diseases;Metabolism	Global and overview maps;Carbohydrate metabolism;Endocrine and metabolic diseases;Amino acid metabolism	ko01100//Metabolic pathways;ko00520//Amino sugar and nucleotide sugar metabolism;ko04931//Insulin resistance;ko00250//Alanine, aspartate and glutamate metabolism	K00820;K00820;K00820;K00820	-	GO:0004360//glutamine-fructose-6-phosphate transaminase (isomerizing) activity;GO:0097367//carbohydrate derivative binding	GO:0006002//fructose 6-phosphate metabolic process;GO:0006047//UDP-N-acetylglucosamine metabolic process;GO:0006048//UDP-N-acetylglucosamine biosynthetic process;GO:0006487//protein N-linked glycosylation;GO:0006541//glutamine metabolic process;GO:1990830//cellular response to leukemia inhibitory factor
MSTRG.2970.1	Sfur004784	0.961567471	0.002187205	Gfpt2	Glutamine--fructose-6-phosphate aminotransferase [isomerizing] 2	Metabolism;Metabolism;Human Diseases;Metabolism	Global and overview maps;Carbohydrate metabolism;Endocrine and metabolic diseases;Amino acid metabolism	ko01100//Metabolic pathways;ko00520//Amino sugar and nucleotide sugar metabolism;ko04931//Insulin resistance;ko00250//Alanine, aspartate and glutamate metabolism	K00820;K00820;K00820;K00820	-	GO:0004360//glutamine-fructose-6-phosphate transaminase (isomerizing) activity;GO:0097367//carbohydrate derivative binding	GO:0006002//fructose 6-phosphate metabolic process;GO:0006047//UDP-N-acetylglucosamine metabolic process;GO:0006048//UDP-N-acetylglucosamine biosynthetic process;GO:0006487//protein N-linked glycosylation;GO:0006541//glutamine metabolic process;GO:1990830//cellular response to leukemia inhibitory factor
MSTRG.11031.1	Sfur004784	0.993337309	6.64E-05	Gfpt2	Glutamine--fructose-6-phosphate aminotransferase [isomerizing] 2	Metabolism;Metabolism;Human Diseases;Metabolism	Global and overview maps;Carbohydrate metabolism;Endocrine and metabolic diseases;Amino acid metabolism	ko01100//Metabolic pathways;ko00520//Amino sugar and nucleotide sugar metabolism;ko04931//Insulin resistance;ko00250//Alanine, aspartate and glutamate metabolism	K00820;K00820;K00820;K00820	-	GO:0004360//glutamine-fructose-6-phosphate transaminase (isomerizing) activity;GO:0097367//carbohydrate derivative binding	GO:0006002//fructose 6-phosphate metabolic process;GO:0006047//UDP-N-acetylglucosamine metabolic process;GO:0006048//UDP-N-acetylglucosamine biosynthetic process;GO:0006487//protein N-linked glycosylation;GO:0006541//glutamine metabolic process;GO:1990830//cellular response to leukemia inhibitory factor
MSTRG.2137.1	Sfur004784	0.969482048	0.001382807	Gfpt2	Glutamine--fructose-6-phosphate aminotransferase [isomerizing] 2	Metabolism;Metabolism;Human Diseases;Metabolism	Global and overview maps;Carbohydrate metabolism;Endocrine and metabolic diseases;Amino acid metabolism	ko01100//Metabolic pathways;ko00520//Amino sugar and nucleotide sugar metabolism;ko04931//Insulin resistance;ko00250//Alanine, aspartate and glutamate metabolism	K00820;K00820;K00820;K00820	-	GO:0004360//glutamine-fructose-6-phosphate transaminase (isomerizing) activity;GO:0097367//carbohydrate derivative binding	GO:0006002//fructose 6-phosphate metabolic process;GO:0006047//UDP-N-acetylglucosamine metabolic process;GO:0006048//UDP-N-acetylglucosamine biosynthetic process;GO:0006487//protein N-linked glycosylation;GO:0006541//glutamine metabolic process;GO:1990830//cellular response to leukemia inhibitory factor
MSTRG.32053.1	Sfur004784	-0.958094135	0.002597357	Gfpt2	Glutamine--fructose-6-phosphate aminotransferase [isomerizing] 2	Metabolism;Metabolism;Human Diseases;Metabolism	Global and overview maps;Carbohydrate metabolism;Endocrine and metabolic diseases;Amino acid metabolism	ko01100//Metabolic pathways;ko00520//Amino sugar and nucleotide sugar metabolism;ko04931//Insulin resistance;ko00250//Alanine, aspartate and glutamate metabolism	K00820;K00820;K00820;K00820	-	GO:0004360//glutamine-fructose-6-phosphate transaminase (isomerizing) activity;GO:0097367//carbohydrate derivative binding	GO:0006002//fructose 6-phosphate metabolic process;GO:0006047//UDP-N-acetylglucosamine metabolic process;GO:0006048//UDP-N-acetylglucosamine biosynthetic process;GO:0006487//protein N-linked glycosylation;GO:0006541//glutamine metabolic process;GO:1990830//cellular response to leukemia inhibitory factor
MSTRG.24047.1	Sfur004784	-0.95749884	0.002671137	Gfpt2	Glutamine--fructose-6-phosphate aminotransferase [isomerizing] 2	Metabolism;Metabolism;Human Diseases;Metabolism	Global and overview maps;Carbohydrate metabolism;Endocrine and metabolic diseases;Amino acid metabolism	ko01100//Metabolic pathways;ko00520//Amino sugar and nucleotide sugar metabolism;ko04931//Insulin resistance;ko00250//Alanine, aspartate and glutamate metabolism	K00820;K00820;K00820;K00820	-	GO:0004360//glutamine-fructose-6-phosphate transaminase (isomerizing) activity;GO:0097367//carbohydrate derivative binding	GO:0006002//fructose 6-phosphate metabolic process;GO:0006047//UDP-N-acetylglucosamine metabolic process;GO:0006048//UDP-N-acetylglucosamine biosynthetic process;GO:0006487//protein N-linked glycosylation;GO:0006541//glutamine metabolic process;GO:1990830//cellular response to leukemia inhibitory factor
MSTRG.29422.2	Sfur004784	-0.971415121	0.001213965	Gfpt2	Glutamine--fructose-6-phosphate aminotransferase [isomerizing] 2	Metabolism;Metabolism;Human Diseases;Metabolism	Global and overview maps;Carbohydrate metabolism;Endocrine and metabolic diseases;Amino acid metabolism	ko01100//Metabolic pathways;ko00520//Amino sugar and nucleotide sugar metabolism;ko04931//Insulin resistance;ko00250//Alanine, aspartate and glutamate metabolism	K00820;K00820;K00820;K00820	-	GO:0004360//glutamine-fructose-6-phosphate transaminase (isomerizing) activity;GO:0097367//carbohydrate derivative binding	GO:0006002//fructose 6-phosphate metabolic process;GO:0006047//UDP-N-acetylglucosamine metabolic process;GO:0006048//UDP-N-acetylglucosamine biosynthetic process;GO:0006487//protein N-linked glycosylation;GO:0006541//glutamine metabolic process;GO:1990830//cellular response to leukemia inhibitory factor
MSTRG.25435.2	Sfur004784	-0.962804768	0.002049498	Gfpt2	Glutamine--fructose-6-phosphate aminotransferase [isomerizing] 2	Metabolism;Metabolism;Human Diseases;Metabolism	Global and overview maps;Carbohydrate metabolism;Endocrine and metabolic diseases;Amino acid metabolism	ko01100//Metabolic pathways;ko00520//Amino sugar and nucleotide sugar metabolism;ko04931//Insulin resistance;ko00250//Alanine, aspartate and glutamate metabolism	K00820;K00820;K00820;K00820	-	GO:0004360//glutamine-fructose-6-phosphate transaminase (isomerizing) activity;GO:0097367//carbohydrate derivative binding	GO:0006002//fructose 6-phosphate metabolic process;GO:0006047//UDP-N-acetylglucosamine metabolic process;GO:0006048//UDP-N-acetylglucosamine biosynthetic process;GO:0006487//protein N-linked glycosylation;GO:0006541//glutamine metabolic process;GO:1990830//cellular response to leukemia inhibitory factor
MSTRG.14616.1	Sfur004784	-0.979929404	0.000600201	Gfpt2	Glutamine--fructose-6-phosphate aminotransferase [isomerizing] 2	Metabolism;Metabolism;Human Diseases;Metabolism	Global and overview maps;Carbohydrate metabolism;Endocrine and metabolic diseases;Amino acid metabolism	ko01100//Metabolic pathways;ko00520//Amino sugar and nucleotide sugar metabolism;ko04931//Insulin resistance;ko00250//Alanine, aspartate and glutamate metabolism	K00820;K00820;K00820;K00820	-	GO:0004360//glutamine-fructose-6-phosphate transaminase (isomerizing) activity;GO:0097367//carbohydrate derivative binding	GO:0006002//fructose 6-phosphate metabolic process;GO:0006047//UDP-N-acetylglucosamine metabolic process;GO:0006048//UDP-N-acetylglucosamine biosynthetic process;GO:0006487//protein N-linked glycosylation;GO:0006541//glutamine metabolic process;GO:1990830//cellular response to leukemia inhibitory factor
MSTRG.122.1	Sfur004784	-0.983328685	0.000414582	Gfpt2	Glutamine--fructose-6-phosphate aminotransferase [isomerizing] 2	Metabolism;Metabolism;Human Diseases;Metabolism	Global and overview maps;Carbohydrate metabolism;Endocrine and metabolic diseases;Amino acid metabolism	ko01100//Metabolic pathways;ko00520//Amino sugar and nucleotide sugar metabolism;ko04931//Insulin resistance;ko00250//Alanine, aspartate and glutamate metabolism	K00820;K00820;K00820;K00820	-	GO:0004360//glutamine-fructose-6-phosphate transaminase (isomerizing) activity;GO:0097367//carbohydrate derivative binding	GO:0006002//fructose 6-phosphate metabolic process;GO:0006047//UDP-N-acetylglucosamine metabolic process;GO:0006048//UDP-N-acetylglucosamine biosynthetic process;GO:0006487//protein N-linked glycosylation;GO:0006541//glutamine metabolic process;GO:1990830//cellular response to leukemia inhibitory factor
MSTRG.4917.1	Sfur004784	-0.969584301	0.001373603	Gfpt2	Glutamine--fructose-6-phosphate aminotransferase [isomerizing] 2	Metabolism;Metabolism;Human Diseases;Metabolism	Global and overview maps;Carbohydrate metabolism;Endocrine and metabolic diseases;Amino acid metabolism	ko01100//Metabolic pathways;ko00520//Amino sugar and nucleotide sugar metabolism;ko04931//Insulin resistance;ko00250//Alanine, aspartate and glutamate metabolism	K00820;K00820;K00820;K00820	-	GO:0004360//glutamine-fructose-6-phosphate transaminase (isomerizing) activity;GO:0097367//carbohydrate derivative binding	GO:0006002//fructose 6-phosphate metabolic process;GO:0006047//UDP-N-acetylglucosamine metabolic process;GO:0006048//UDP-N-acetylglucosamine biosynthetic process;GO:0006487//protein N-linked glycosylation;GO:0006541//glutamine metabolic process;GO:1990830//cellular response to leukemia inhibitory factor
MSTRG.39767.1	Sfur004784	0.968605475	0.001462953	Gfpt2	Glutamine--fructose-6-phosphate aminotransferase [isomerizing] 2	Metabolism;Metabolism;Human Diseases;Metabolism	Global and overview maps;Carbohydrate metabolism;Endocrine and metabolic diseases;Amino acid metabolism	ko01100//Metabolic pathways;ko00520//Amino sugar and nucleotide sugar metabolism;ko04931//Insulin resistance;ko00250//Alanine, aspartate and glutamate metabolism	K00820;K00820;K00820;K00820	-	GO:0004360//glutamine-fructose-6-phosphate transaminase (isomerizing) activity;GO:0097367//carbohydrate derivative binding	GO:0006002//fructose 6-phosphate metabolic process;GO:0006047//UDP-N-acetylglucosamine metabolic process;GO:0006048//UDP-N-acetylglucosamine biosynthetic process;GO:0006487//protein N-linked glycosylation;GO:0006541//glutamine metabolic process;GO:1990830//cellular response to leukemia inhibitory factor
MSTRG.25578.1	Sfur004784	-0.984336598	0.000366092	Gfpt2	Glutamine--fructose-6-phosphate aminotransferase [isomerizing] 2	Metabolism;Metabolism;Human Diseases;Metabolism	Global and overview maps;Carbohydrate metabolism;Endocrine and metabolic diseases;Amino acid metabolism	ko01100//Metabolic pathways;ko00520//Amino sugar and nucleotide sugar metabolism;ko04931//Insulin resistance;ko00250//Alanine, aspartate and glutamate metabolism	K00820;K00820;K00820;K00820	-	GO:0004360//glutamine-fructose-6-phosphate transaminase (isomerizing) activity;GO:0097367//carbohydrate derivative binding	GO:0006002//fructose 6-phosphate metabolic process;GO:0006047//UDP-N-acetylglucosamine metabolic process;GO:0006048//UDP-N-acetylglucosamine biosynthetic process;GO:0006487//protein N-linked glycosylation;GO:0006541//glutamine metabolic process;GO:1990830//cellular response to leukemia inhibitory factor
MSTRG.7214.1	Sfur004784	0.968484798	0.001474161	Gfpt2	Glutamine--fructose-6-phosphate aminotransferase [isomerizing] 2	Metabolism;Metabolism;Human Diseases;Metabolism	Global and overview maps;Carbohydrate metabolism;Endocrine and metabolic diseases;Amino acid metabolism	ko01100//Metabolic pathways;ko00520//Amino sugar and nucleotide sugar metabolism;ko04931//Insulin resistance;ko00250//Alanine, aspartate and glutamate metabolism	K00820;K00820;K00820;K00820	-	GO:0004360//glutamine-fructose-6-phosphate transaminase (isomerizing) activity;GO:0097367//carbohydrate derivative binding	GO:0006002//fructose 6-phosphate metabolic process;GO:0006047//UDP-N-acetylglucosamine metabolic process;GO:0006048//UDP-N-acetylglucosamine biosynthetic process;GO:0006487//protein N-linked glycosylation;GO:0006541//glutamine metabolic process;GO:1990830//cellular response to leukemia inhibitory factor
MSTRG.1309.1	Sfur004784	0.990834116	0.000125635	Gfpt2	Glutamine--fructose-6-phosphate aminotransferase [isomerizing] 2	Metabolism;Metabolism;Human Diseases;Metabolism	Global and overview maps;Carbohydrate metabolism;Endocrine and metabolic diseases;Amino acid metabolism	ko01100//Metabolic pathways;ko00520//Amino sugar and nucleotide sugar metabolism;ko04931//Insulin resistance;ko00250//Alanine, aspartate and glutamate metabolism	K00820;K00820;K00820;K00820	-	GO:0004360//glutamine-fructose-6-phosphate transaminase (isomerizing) activity;GO:0097367//carbohydrate derivative binding	GO:0006002//fructose 6-phosphate metabolic process;GO:0006047//UDP-N-acetylglucosamine metabolic process;GO:0006048//UDP-N-acetylglucosamine biosynthetic process;GO:0006487//protein N-linked glycosylation;GO:0006541//glutamine metabolic process;GO:1990830//cellular response to leukemia inhibitory factor
MSTRG.4310.1	Sfur004784	-0.981229308	0.000525202	Gfpt2	Glutamine--fructose-6-phosphate aminotransferase [isomerizing] 2	Metabolism;Metabolism;Human Diseases;Metabolism	Global and overview maps;Carbohydrate metabolism;Endocrine and metabolic diseases;Amino acid metabolism	ko01100//Metabolic pathways;ko00520//Amino sugar and nucleotide sugar metabolism;ko04931//Insulin resistance;ko00250//Alanine, aspartate and glutamate metabolism	K00820;K00820;K00820;K00820	-	GO:0004360//glutamine-fructose-6-phosphate transaminase (isomerizing) activity;GO:0097367//carbohydrate derivative binding	GO:0006002//fructose 6-phosphate metabolic process;GO:0006047//UDP-N-acetylglucosamine metabolic process;GO:0006048//UDP-N-acetylglucosamine biosynthetic process;GO:0006487//protein N-linked glycosylation;GO:0006541//glutamine metabolic process;GO:1990830//cellular response to leukemia inhibitory factor
MSTRG.32768.1	Sfur004784	-0.974420507	0.000973097	Gfpt2	Glutamine--fructose-6-phosphate aminotransferase [isomerizing] 2	Metabolism;Metabolism;Human Diseases;Metabolism	Global and overview maps;Carbohydrate metabolism;Endocrine and metabolic diseases;Amino acid metabolism	ko01100//Metabolic pathways;ko00520//Amino sugar and nucleotide sugar metabolism;ko04931//Insulin resistance;ko00250//Alanine, aspartate and glutamate metabolism	K00820;K00820;K00820;K00820	-	GO:0004360//glutamine-fructose-6-phosphate transaminase (isomerizing) activity;GO:0097367//carbohydrate derivative binding	GO:0006002//fructose 6-phosphate metabolic process;GO:0006047//UDP-N-acetylglucosamine metabolic process;GO:0006048//UDP-N-acetylglucosamine biosynthetic process;GO:0006487//protein N-linked glycosylation;GO:0006541//glutamine metabolic process;GO:1990830//cellular response to leukemia inhibitory factor
MSTRG.12191.1	Sfur004784	0.96455104	0.00186267	Gfpt2	Glutamine--fructose-6-phosphate aminotransferase [isomerizing] 2	Metabolism;Metabolism;Human Diseases;Metabolism	Global and overview maps;Carbohydrate metabolism;Endocrine and metabolic diseases;Amino acid metabolism	ko01100//Metabolic pathways;ko00520//Amino sugar and nucleotide sugar metabolism;ko04931//Insulin resistance;ko00250//Alanine, aspartate and glutamate metabolism	K00820;K00820;K00820;K00820	-	GO:0004360//glutamine-fructose-6-phosphate transaminase (isomerizing) activity;GO:0097367//carbohydrate derivative binding	GO:0006002//fructose 6-phosphate metabolic process;GO:0006047//UDP-N-acetylglucosamine metabolic process;GO:0006048//UDP-N-acetylglucosamine biosynthetic process;GO:0006487//protein N-linked glycosylation;GO:0006541//glutamine metabolic process;GO:1990830//cellular response to leukemia inhibitory factor
MSTRG.4870.1	Sfur004784	-0.970537615	0.001289261	Gfpt2	Glutamine--fructose-6-phosphate aminotransferase [isomerizing] 2	Metabolism;Metabolism;Human Diseases;Metabolism	Global and overview maps;Carbohydrate metabolism;Endocrine and metabolic diseases;Amino acid metabolism	ko01100//Metabolic pathways;ko00520//Amino sugar and nucleotide sugar metabolism;ko04931//Insulin resistance;ko00250//Alanine, aspartate and glutamate metabolism	K00820;K00820;K00820;K00820	-	GO:0004360//glutamine-fructose-6-phosphate transaminase (isomerizing) activity;GO:0097367//carbohydrate derivative binding	GO:0006002//fructose 6-phosphate metabolic process;GO:0006047//UDP-N-acetylglucosamine metabolic process;GO:0006048//UDP-N-acetylglucosamine biosynthetic process;GO:0006487//protein N-linked glycosylation;GO:0006541//glutamine metabolic process;GO:1990830//cellular response to leukemia inhibitory factor
MSTRG.12968.2	Sfur004784	-0.986623477	0.0002672	Gfpt2	Glutamine--fructose-6-phosphate aminotransferase [isomerizing] 2	Metabolism;Metabolism;Human Diseases;Metabolism	Global and overview maps;Carbohydrate metabolism;Endocrine and metabolic diseases;Amino acid metabolism	ko01100//Metabolic pathways;ko00520//Amino sugar and nucleotide sugar metabolism;ko04931//Insulin resistance;ko00250//Alanine, aspartate and glutamate metabolism	K00820;K00820;K00820;K00820	-	GO:0004360//glutamine-fructose-6-phosphate transaminase (isomerizing) activity;GO:0097367//carbohydrate derivative binding	GO:0006002//fructose 6-phosphate metabolic process;GO:0006047//UDP-N-acetylglucosamine metabolic process;GO:0006048//UDP-N-acetylglucosamine biosynthetic process;GO:0006487//protein N-linked glycosylation;GO:0006541//glutamine metabolic process;GO:1990830//cellular response to leukemia inhibitory factor
MSTRG.6175.1	Sfur004784	-0.974765227	0.000947156	Gfpt2	Glutamine--fructose-6-phosphate aminotransferase [isomerizing] 2	Metabolism;Metabolism;Human Diseases;Metabolism	Global and overview maps;Carbohydrate metabolism;Endocrine and metabolic diseases;Amino acid metabolism	ko01100//Metabolic pathways;ko00520//Amino sugar and nucleotide sugar metabolism;ko04931//Insulin resistance;ko00250//Alanine, aspartate and glutamate metabolism	K00820;K00820;K00820;K00820	-	GO:0004360//glutamine-fructose-6-phosphate transaminase (isomerizing) activity;GO:0097367//carbohydrate derivative binding	GO:0006002//fructose 6-phosphate metabolic process;GO:0006047//UDP-N-acetylglucosamine metabolic process;GO:0006048//UDP-N-acetylglucosamine biosynthetic process;GO:0006487//protein N-linked glycosylation;GO:0006541//glutamine metabolic process;GO:1990830//cellular response to leukemia inhibitory factor
MSTRG.22706.3	Sfur004784	-0.986481867	0.000272875	Gfpt2	Glutamine--fructose-6-phosphate aminotransferase [isomerizing] 2	Metabolism;Metabolism;Human Diseases;Metabolism	Global and overview maps;Carbohydrate metabolism;Endocrine and metabolic diseases;Amino acid metabolism	ko01100//Metabolic pathways;ko00520//Amino sugar and nucleotide sugar metabolism;ko04931//Insulin resistance;ko00250//Alanine, aspartate and glutamate metabolism	K00820;K00820;K00820;K00820	-	GO:0004360//glutamine-fructose-6-phosphate transaminase (isomerizing) activity;GO:0097367//carbohydrate derivative binding	GO:0006002//fructose 6-phosphate metabolic process;GO:0006047//UDP-N-acetylglucosamine metabolic process;GO:0006048//UDP-N-acetylglucosamine biosynthetic process;GO:0006487//protein N-linked glycosylation;GO:0006541//glutamine metabolic process;GO:1990830//cellular response to leukemia inhibitory factor
MSTRG.31094.1	Sfur004784	-0.960134356	0.002352226	Gfpt2	Glutamine--fructose-6-phosphate aminotransferase [isomerizing] 2	Metabolism;Metabolism;Human Diseases;Metabolism	Global and overview maps;Carbohydrate metabolism;Endocrine and metabolic diseases;Amino acid metabolism	ko01100//Metabolic pathways;ko00520//Amino sugar and nucleotide sugar metabolism;ko04931//Insulin resistance;ko00250//Alanine, aspartate and glutamate metabolism	K00820;K00820;K00820;K00820	-	GO:0004360//glutamine-fructose-6-phosphate transaminase (isomerizing) activity;GO:0097367//carbohydrate derivative binding	GO:0006002//fructose 6-phosphate metabolic process;GO:0006047//UDP-N-acetylglucosamine metabolic process;GO:0006048//UDP-N-acetylglucosamine biosynthetic process;GO:0006487//protein N-linked glycosylation;GO:0006541//glutamine metabolic process;GO:1990830//cellular response to leukemia inhibitory factor
MSTRG.3820.1	Sfur004784	-0.979655669	0.000616628	Gfpt2	Glutamine--fructose-6-phosphate aminotransferase [isomerizing] 2	Metabolism;Metabolism;Human Diseases;Metabolism	Global and overview maps;Carbohydrate metabolism;Endocrine and metabolic diseases;Amino acid metabolism	ko01100//Metabolic pathways;ko00520//Amino sugar and nucleotide sugar metabolism;ko04931//Insulin resistance;ko00250//Alanine, aspartate and glutamate metabolism	K00820;K00820;K00820;K00820	-	GO:0004360//glutamine-fructose-6-phosphate transaminase (isomerizing) activity;GO:0097367//carbohydrate derivative binding	GO:0006002//fructose 6-phosphate metabolic process;GO:0006047//UDP-N-acetylglucosamine metabolic process;GO:0006048//UDP-N-acetylglucosamine biosynthetic process;GO:0006487//protein N-linked glycosylation;GO:0006541//glutamine metabolic process;GO:1990830//cellular response to leukemia inhibitory factor
MSTRG.38275.2	Sfur004784	-0.97604862	0.000853633	Gfpt2	Glutamine--fructose-6-phosphate aminotransferase [isomerizing] 2	Metabolism;Metabolism;Human Diseases;Metabolism	Global and overview maps;Carbohydrate metabolism;Endocrine and metabolic diseases;Amino acid metabolism	ko01100//Metabolic pathways;ko00520//Amino sugar and nucleotide sugar metabolism;ko04931//Insulin resistance;ko00250//Alanine, aspartate and glutamate metabolism	K00820;K00820;K00820;K00820	-	GO:0004360//glutamine-fructose-6-phosphate transaminase (isomerizing) activity;GO:0097367//carbohydrate derivative binding	GO:0006002//fructose 6-phosphate metabolic process;GO:0006047//UDP-N-acetylglucosamine metabolic process;GO:0006048//UDP-N-acetylglucosamine biosynthetic process;GO:0006487//protein N-linked glycosylation;GO:0006541//glutamine metabolic process;GO:1990830//cellular response to leukemia inhibitory factor
MSTRG.18627.1	Sfur004784	0.996861448	1.48E-05	Gfpt2	Glutamine--fructose-6-phosphate aminotransferase [isomerizing] 2	Metabolism;Metabolism;Human Diseases;Metabolism	Global and overview maps;Carbohydrate metabolism;Endocrine and metabolic diseases;Amino acid metabolism	ko01100//Metabolic pathways;ko00520//Amino sugar and nucleotide sugar metabolism;ko04931//Insulin resistance;ko00250//Alanine, aspartate and glutamate metabolism	K00820;K00820;K00820;K00820	-	GO:0004360//glutamine-fructose-6-phosphate transaminase (isomerizing) activity;GO:0097367//carbohydrate derivative binding	GO:0006002//fructose 6-phosphate metabolic process;GO:0006047//UDP-N-acetylglucosamine metabolic process;GO:0006048//UDP-N-acetylglucosamine biosynthetic process;GO:0006487//protein N-linked glycosylation;GO:0006541//glutamine metabolic process;GO:1990830//cellular response to leukemia inhibitory factor
MSTRG.37501.1	Sfur004784	-0.954146163	0.003105656	Gfpt2	Glutamine--fructose-6-phosphate aminotransferase [isomerizing] 2	Metabolism;Metabolism;Human Diseases;Metabolism	Global and overview maps;Carbohydrate metabolism;Endocrine and metabolic diseases;Amino acid metabolism	ko01100//Metabolic pathways;ko00520//Amino sugar and nucleotide sugar metabolism;ko04931//Insulin resistance;ko00250//Alanine, aspartate and glutamate metabolism	K00820;K00820;K00820;K00820	-	GO:0004360//glutamine-fructose-6-phosphate transaminase (isomerizing) activity;GO:0097367//carbohydrate derivative binding	GO:0006002//fructose 6-phosphate metabolic process;GO:0006047//UDP-N-acetylglucosamine metabolic process;GO:0006048//UDP-N-acetylglucosamine biosynthetic process;GO:0006487//protein N-linked glycosylation;GO:0006541//glutamine metabolic process;GO:1990830//cellular response to leukemia inhibitory factor
MSTRG.3765.1	Sfur004784	-0.988274239	0.000205434	Gfpt2	Glutamine--fructose-6-phosphate aminotransferase [isomerizing] 2	Metabolism;Metabolism;Human Diseases;Metabolism	Global and overview maps;Carbohydrate metabolism;Endocrine and metabolic diseases;Amino acid metabolism	ko01100//Metabolic pathways;ko00520//Amino sugar and nucleotide sugar metabolism;ko04931//Insulin resistance;ko00250//Alanine, aspartate and glutamate metabolism	K00820;K00820;K00820;K00820	-	GO:0004360//glutamine-fructose-6-phosphate transaminase (isomerizing) activity;GO:0097367//carbohydrate derivative binding	GO:0006002//fructose 6-phosphate metabolic process;GO:0006047//UDP-N-acetylglucosamine metabolic process;GO:0006048//UDP-N-acetylglucosamine biosynthetic process;GO:0006487//protein N-linked glycosylation;GO:0006541//glutamine metabolic process;GO:1990830//cellular response to leukemia inhibitory factor
MSTRG.23081.2	Sfur004784	-0.978784485	0.000670373	Gfpt2	Glutamine--fructose-6-phosphate aminotransferase [isomerizing] 2	Metabolism;Metabolism;Human Diseases;Metabolism	Global and overview maps;Carbohydrate metabolism;Endocrine and metabolic diseases;Amino acid metabolism	ko01100//Metabolic pathways;ko00520//Amino sugar and nucleotide sugar metabolism;ko04931//Insulin resistance;ko00250//Alanine, aspartate and glutamate metabolism	K00820;K00820;K00820;K00820	-	GO:0004360//glutamine-fructose-6-phosphate transaminase (isomerizing) activity;GO:0097367//carbohydrate derivative binding	GO:0006002//fructose 6-phosphate metabolic process;GO:0006047//UDP-N-acetylglucosamine metabolic process;GO:0006048//UDP-N-acetylglucosamine biosynthetic process;GO:0006487//protein N-linked glycosylation;GO:0006541//glutamine metabolic process;GO:1990830//cellular response to leukemia inhibitory factor
MSTRG.26304.1	Sfur004784	-0.97339674	0.001052186	Gfpt2	Glutamine--fructose-6-phosphate aminotransferase [isomerizing] 2	Metabolism;Metabolism;Human Diseases;Metabolism	Global and overview maps;Carbohydrate metabolism;Endocrine and metabolic diseases;Amino acid metabolism	ko01100//Metabolic pathways;ko00520//Amino sugar and nucleotide sugar metabolism;ko04931//Insulin resistance;ko00250//Alanine, aspartate and glutamate metabolism	K00820;K00820;K00820;K00820	-	GO:0004360//glutamine-fructose-6-phosphate transaminase (isomerizing) activity;GO:0097367//carbohydrate derivative binding	GO:0006002//fructose 6-phosphate metabolic process;GO:0006047//UDP-N-acetylglucosamine metabolic process;GO:0006048//UDP-N-acetylglucosamine biosynthetic process;GO:0006487//protein N-linked glycosylation;GO:0006541//glutamine metabolic process;GO:1990830//cellular response to leukemia inhibitory factor
MSTRG.27717.1	Sfur004784	-0.962392707	0.002094869	Gfpt2	Glutamine--fructose-6-phosphate aminotransferase [isomerizing] 2	Metabolism;Metabolism;Human Diseases;Metabolism	Global and overview maps;Carbohydrate metabolism;Endocrine and metabolic diseases;Amino acid metabolism	ko01100//Metabolic pathways;ko00520//Amino sugar and nucleotide sugar metabolism;ko04931//Insulin resistance;ko00250//Alanine, aspartate and glutamate metabolism	K00820;K00820;K00820;K00820	-	GO:0004360//glutamine-fructose-6-phosphate transaminase (isomerizing) activity;GO:0097367//carbohydrate derivative binding	GO:0006002//fructose 6-phosphate metabolic process;GO:0006047//UDP-N-acetylglucosamine metabolic process;GO:0006048//UDP-N-acetylglucosamine biosynthetic process;GO:0006487//protein N-linked glycosylation;GO:0006541//glutamine metabolic process;GO:1990830//cellular response to leukemia inhibitory factor
MSTRG.31600.3	Sfur004784	-0.967798799	0.001538681	Gfpt2	Glutamine--fructose-6-phosphate aminotransferase [isomerizing] 2	Metabolism;Metabolism;Human Diseases;Metabolism	Global and overview maps;Carbohydrate metabolism;Endocrine and metabolic diseases;Amino acid metabolism	ko01100//Metabolic pathways;ko00520//Amino sugar and nucleotide sugar metabolism;ko04931//Insulin resistance;ko00250//Alanine, aspartate and glutamate metabolism	K00820;K00820;K00820;K00820	-	GO:0004360//glutamine-fructose-6-phosphate transaminase (isomerizing) activity;GO:0097367//carbohydrate derivative binding	GO:0006002//fructose 6-phosphate metabolic process;GO:0006047//UDP-N-acetylglucosamine metabolic process;GO:0006048//UDP-N-acetylglucosamine biosynthetic process;GO:0006487//protein N-linked glycosylation;GO:0006541//glutamine metabolic process;GO:1990830//cellular response to leukemia inhibitory factor
MSTRG.21259.5	Sfur004784	-0.953136767	0.003242784	Gfpt2	Glutamine--fructose-6-phosphate aminotransferase [isomerizing] 2	Metabolism;Metabolism;Human Diseases;Metabolism	Global and overview maps;Carbohydrate metabolism;Endocrine and metabolic diseases;Amino acid metabolism	ko01100//Metabolic pathways;ko00520//Amino sugar and nucleotide sugar metabolism;ko04931//Insulin resistance;ko00250//Alanine, aspartate and glutamate metabolism	K00820;K00820;K00820;K00820	-	GO:0004360//glutamine-fructose-6-phosphate transaminase (isomerizing) activity;GO:0097367//carbohydrate derivative binding	GO:0006002//fructose 6-phosphate metabolic process;GO:0006047//UDP-N-acetylglucosamine metabolic process;GO:0006048//UDP-N-acetylglucosamine biosynthetic process;GO:0006487//protein N-linked glycosylation;GO:0006541//glutamine metabolic process;GO:1990830//cellular response to leukemia inhibitory factor
MSTRG.29822.3	Sfur004784	-0.989592873	0.000161899	Gfpt2	Glutamine--fructose-6-phosphate aminotransferase [isomerizing] 2	Metabolism;Metabolism;Human Diseases;Metabolism	Global and overview maps;Carbohydrate metabolism;Endocrine and metabolic diseases;Amino acid metabolism	ko01100//Metabolic pathways;ko00520//Amino sugar and nucleotide sugar metabolism;ko04931//Insulin resistance;ko00250//Alanine, aspartate and glutamate metabolism	K00820;K00820;K00820;K00820	-	GO:0004360//glutamine-fructose-6-phosphate transaminase (isomerizing) activity;GO:0097367//carbohydrate derivative binding	GO:0006002//fructose 6-phosphate metabolic process;GO:0006047//UDP-N-acetylglucosamine metabolic process;GO:0006048//UDP-N-acetylglucosamine biosynthetic process;GO:0006487//protein N-linked glycosylation;GO:0006541//glutamine metabolic process;GO:1990830//cellular response to leukemia inhibitory factor
MSTRG.16287.1	Sfur004784	0.975525727	0.000891155	Gfpt2	Glutamine--fructose-6-phosphate aminotransferase [isomerizing] 2	Metabolism;Metabolism;Human Diseases;Metabolism	Global and overview maps;Carbohydrate metabolism;Endocrine and metabolic diseases;Amino acid metabolism	ko01100//Metabolic pathways;ko00520//Amino sugar and nucleotide sugar metabolism;ko04931//Insulin resistance;ko00250//Alanine, aspartate and glutamate metabolism	K00820;K00820;K00820;K00820	-	GO:0004360//glutamine-fructose-6-phosphate transaminase (isomerizing) activity;GO:0097367//carbohydrate derivative binding	GO:0006002//fructose 6-phosphate metabolic process;GO:0006047//UDP-N-acetylglucosamine metabolic process;GO:0006048//UDP-N-acetylglucosamine biosynthetic process;GO:0006487//protein N-linked glycosylation;GO:0006541//glutamine metabolic process;GO:1990830//cellular response to leukemia inhibitory factor
MSTRG.17005.1	Sfur004784	0.97477452	0.000946461	Gfpt2	Glutamine--fructose-6-phosphate aminotransferase [isomerizing] 2	Metabolism;Metabolism;Human Diseases;Metabolism	Global and overview maps;Carbohydrate metabolism;Endocrine and metabolic diseases;Amino acid metabolism	ko01100//Metabolic pathways;ko00520//Amino sugar and nucleotide sugar metabolism;ko04931//Insulin resistance;ko00250//Alanine, aspartate and glutamate metabolism	K00820;K00820;K00820;K00820	-	GO:0004360//glutamine-fructose-6-phosphate transaminase (isomerizing) activity;GO:0097367//carbohydrate derivative binding	GO:0006002//fructose 6-phosphate metabolic process;GO:0006047//UDP-N-acetylglucosamine metabolic process;GO:0006048//UDP-N-acetylglucosamine biosynthetic process;GO:0006487//protein N-linked glycosylation;GO:0006541//glutamine metabolic process;GO:1990830//cellular response to leukemia inhibitory factor
MSTRG.3054.1	Sfur004784	-0.978025523	0.000719011	Gfpt2	Glutamine--fructose-6-phosphate aminotransferase [isomerizing] 2	Metabolism;Metabolism;Human Diseases;Metabolism	Global and overview maps;Carbohydrate metabolism;Endocrine and metabolic diseases;Amino acid metabolism	ko01100//Metabolic pathways;ko00520//Amino sugar and nucleotide sugar metabolism;ko04931//Insulin resistance;ko00250//Alanine, aspartate and glutamate metabolism	K00820;K00820;K00820;K00820	-	GO:0004360//glutamine-fructose-6-phosphate transaminase (isomerizing) activity;GO:0097367//carbohydrate derivative binding	GO:0006002//fructose 6-phosphate metabolic process;GO:0006047//UDP-N-acetylglucosamine metabolic process;GO:0006048//UDP-N-acetylglucosamine biosynthetic process;GO:0006487//protein N-linked glycosylation;GO:0006541//glutamine metabolic process;GO:1990830//cellular response to leukemia inhibitory factor
MSTRG.31427.1	Sfur004784	0.952346327	0.003352201	Gfpt2	Glutamine--fructose-6-phosphate aminotransferase [isomerizing] 2	Metabolism;Metabolism;Human Diseases;Metabolism	Global and overview maps;Carbohydrate metabolism;Endocrine and metabolic diseases;Amino acid metabolism	ko01100//Metabolic pathways;ko00520//Amino sugar and nucleotide sugar metabolism;ko04931//Insulin resistance;ko00250//Alanine, aspartate and glutamate metabolism	K00820;K00820;K00820;K00820	-	GO:0004360//glutamine-fructose-6-phosphate transaminase (isomerizing) activity;GO:0097367//carbohydrate derivative binding	GO:0006002//fructose 6-phosphate metabolic process;GO:0006047//UDP-N-acetylglucosamine metabolic process;GO:0006048//UDP-N-acetylglucosamine biosynthetic process;GO:0006487//protein N-linked glycosylation;GO:0006541//glutamine metabolic process;GO:1990830//cellular response to leukemia inhibitory factor
MSTRG.24395.1	Sfur004784	0.958332212	0.002568135	Gfpt2	Glutamine--fructose-6-phosphate aminotransferase [isomerizing] 2	Metabolism;Metabolism;Human Diseases;Metabolism	Global and overview maps;Carbohydrate metabolism;Endocrine and metabolic diseases;Amino acid metabolism	ko01100//Metabolic pathways;ko00520//Amino sugar and nucleotide sugar metabolism;ko04931//Insulin resistance;ko00250//Alanine, aspartate and glutamate metabolism	K00820;K00820;K00820;K00820	-	GO:0004360//glutamine-fructose-6-phosphate transaminase (isomerizing) activity;GO:0097367//carbohydrate derivative binding	GO:0006002//fructose 6-phosphate metabolic process;GO:0006047//UDP-N-acetylglucosamine metabolic process;GO:0006048//UDP-N-acetylglucosamine biosynthetic process;GO:0006487//protein N-linked glycosylation;GO:0006541//glutamine metabolic process;GO:1990830//cellular response to leukemia inhibitory factor
MSTRG.24994.6	Sfur004784	-0.955444974	0.002933501	Gfpt2	Glutamine--fructose-6-phosphate aminotransferase [isomerizing] 2	Metabolism;Metabolism;Human Diseases;Metabolism	Global and overview maps;Carbohydrate metabolism;Endocrine and metabolic diseases;Amino acid metabolism	ko01100//Metabolic pathways;ko00520//Amino sugar and nucleotide sugar metabolism;ko04931//Insulin resistance;ko00250//Alanine, aspartate and glutamate metabolism	K00820;K00820;K00820;K00820	-	GO:0004360//glutamine-fructose-6-phosphate transaminase (isomerizing) activity;GO:0097367//carbohydrate derivative binding	GO:0006002//fructose 6-phosphate metabolic process;GO:0006047//UDP-N-acetylglucosamine metabolic process;GO:0006048//UDP-N-acetylglucosamine biosynthetic process;GO:0006487//protein N-linked glycosylation;GO:0006541//glutamine metabolic process;GO:1990830//cellular response to leukemia inhibitory factor
MSTRG.21853.1	Sfur004784	-0.979908501	0.000601447	Gfpt2	Glutamine--fructose-6-phosphate aminotransferase [isomerizing] 2	Metabolism;Metabolism;Human Diseases;Metabolism	Global and overview maps;Carbohydrate metabolism;Endocrine and metabolic diseases;Amino acid metabolism	ko01100//Metabolic pathways;ko00520//Amino sugar and nucleotide sugar metabolism;ko04931//Insulin resistance;ko00250//Alanine, aspartate and glutamate metabolism	K00820;K00820;K00820;K00820	-	GO:0004360//glutamine-fructose-6-phosphate transaminase (isomerizing) activity;GO:0097367//carbohydrate derivative binding	GO:0006002//fructose 6-phosphate metabolic process;GO:0006047//UDP-N-acetylglucosamine metabolic process;GO:0006048//UDP-N-acetylglucosamine biosynthetic process;GO:0006487//protein N-linked glycosylation;GO:0006541//glutamine metabolic process;GO:1990830//cellular response to leukemia inhibitory factor
MSTRG.28253.4	Sfur004784	-0.977251904	0.000770328	Gfpt2	Glutamine--fructose-6-phosphate aminotransferase [isomerizing] 2	Metabolism;Metabolism;Human Diseases;Metabolism	Global and overview maps;Carbohydrate metabolism;Endocrine and metabolic diseases;Amino acid metabolism	ko01100//Metabolic pathways;ko00520//Amino sugar and nucleotide sugar metabolism;ko04931//Insulin resistance;ko00250//Alanine, aspartate and glutamate metabolism	K00820;K00820;K00820;K00820	-	GO:0004360//glutamine-fructose-6-phosphate transaminase (isomerizing) activity;GO:0097367//carbohydrate derivative binding	GO:0006002//fructose 6-phosphate metabolic process;GO:0006047//UDP-N-acetylglucosamine metabolic process;GO:0006048//UDP-N-acetylglucosamine biosynthetic process;GO:0006487//protein N-linked glycosylation;GO:0006541//glutamine metabolic process;GO:1990830//cellular response to leukemia inhibitory factor
MSTRG.13238.1	Sfur004784	0.980082214	0.000591126	Gfpt2	Glutamine--fructose-6-phosphate aminotransferase [isomerizing] 2	Metabolism;Metabolism;Human Diseases;Metabolism	Global and overview maps;Carbohydrate metabolism;Endocrine and metabolic diseases;Amino acid metabolism	ko01100//Metabolic pathways;ko00520//Amino sugar and nucleotide sugar metabolism;ko04931//Insulin resistance;ko00250//Alanine, aspartate and glutamate metabolism	K00820;K00820;K00820;K00820	-	GO:0004360//glutamine-fructose-6-phosphate transaminase (isomerizing) activity;GO:0097367//carbohydrate derivative binding	GO:0006002//fructose 6-phosphate metabolic process;GO:0006047//UDP-N-acetylglucosamine metabolic process;GO:0006048//UDP-N-acetylglucosamine biosynthetic process;GO:0006487//protein N-linked glycosylation;GO:0006541//glutamine metabolic process;GO:1990830//cellular response to leukemia inhibitory factor
MSTRG.32068.1	Sfur004784	-0.953314896	0.003218373	Gfpt2	Glutamine--fructose-6-phosphate aminotransferase [isomerizing] 2	Metabolism;Metabolism;Human Diseases;Metabolism	Global and overview maps;Carbohydrate metabolism;Endocrine and metabolic diseases;Amino acid metabolism	ko01100//Metabolic pathways;ko00520//Amino sugar and nucleotide sugar metabolism;ko04931//Insulin resistance;ko00250//Alanine, aspartate and glutamate metabolism	K00820;K00820;K00820;K00820	-	GO:0004360//glutamine-fructose-6-phosphate transaminase (isomerizing) activity;GO:0097367//carbohydrate derivative binding	GO:0006002//fructose 6-phosphate metabolic process;GO:0006047//UDP-N-acetylglucosamine metabolic process;GO:0006048//UDP-N-acetylglucosamine biosynthetic process;GO:0006487//protein N-linked glycosylation;GO:0006541//glutamine metabolic process;GO:1990830//cellular response to leukemia inhibitory factor
MSTRG.39779.1	Sfur004784	-0.950907618	0.003555935	Gfpt2	Glutamine--fructose-6-phosphate aminotransferase [isomerizing] 2	Metabolism;Metabolism;Human Diseases;Metabolism	Global and overview maps;Carbohydrate metabolism;Endocrine and metabolic diseases;Amino acid metabolism	ko01100//Metabolic pathways;ko00520//Amino sugar and nucleotide sugar metabolism;ko04931//Insulin resistance;ko00250//Alanine, aspartate and glutamate metabolism	K00820;K00820;K00820;K00820	-	GO:0004360//glutamine-fructose-6-phosphate transaminase (isomerizing) activity;GO:0097367//carbohydrate derivative binding	GO:0006002//fructose 6-phosphate metabolic process;GO:0006047//UDP-N-acetylglucosamine metabolic process;GO:0006048//UDP-N-acetylglucosamine biosynthetic process;GO:0006487//protein N-linked glycosylation;GO:0006541//glutamine metabolic process;GO:1990830//cellular response to leukemia inhibitory factor
MSTRG.11728.1	Sfur004784	-0.967633015	0.001554478	Gfpt2	Glutamine--fructose-6-phosphate aminotransferase [isomerizing] 2	Metabolism;Metabolism;Human Diseases;Metabolism	Global and overview maps;Carbohydrate metabolism;Endocrine and metabolic diseases;Amino acid metabolism	ko01100//Metabolic pathways;ko00520//Amino sugar and nucleotide sugar metabolism;ko04931//Insulin resistance;ko00250//Alanine, aspartate and glutamate metabolism	K00820;K00820;K00820;K00820	-	GO:0004360//glutamine-fructose-6-phosphate transaminase (isomerizing) activity;GO:0097367//carbohydrate derivative binding	GO:0006002//fructose 6-phosphate metabolic process;GO:0006047//UDP-N-acetylglucosamine metabolic process;GO:0006048//UDP-N-acetylglucosamine biosynthetic process;GO:0006487//protein N-linked glycosylation;GO:0006541//glutamine metabolic process;GO:1990830//cellular response to leukemia inhibitory factor
MSTRG.39215.1	Sfur004784	-0.992925387	7.49E-05	Gfpt2	Glutamine--fructose-6-phosphate aminotransferase [isomerizing] 2	Metabolism;Metabolism;Human Diseases;Metabolism	Global and overview maps;Carbohydrate metabolism;Endocrine and metabolic diseases;Amino acid metabolism	ko01100//Metabolic pathways;ko00520//Amino sugar and nucleotide sugar metabolism;ko04931//Insulin resistance;ko00250//Alanine, aspartate and glutamate metabolism	K00820;K00820;K00820;K00820	-	GO:0004360//glutamine-fructose-6-phosphate transaminase (isomerizing) activity;GO:0097367//carbohydrate derivative binding	GO:0006002//fructose 6-phosphate metabolic process;GO:0006047//UDP-N-acetylglucosamine metabolic process;GO:0006048//UDP-N-acetylglucosamine biosynthetic process;GO:0006487//protein N-linked glycosylation;GO:0006541//glutamine metabolic process;GO:1990830//cellular response to leukemia inhibitory factor
MSTRG.25057.1	Sfur004784	-0.975681535	0.000879891	Gfpt2	Glutamine--fructose-6-phosphate aminotransferase [isomerizing] 2	Metabolism;Metabolism;Human Diseases;Metabolism	Global and overview maps;Carbohydrate metabolism;Endocrine and metabolic diseases;Amino acid metabolism	ko01100//Metabolic pathways;ko00520//Amino sugar and nucleotide sugar metabolism;ko04931//Insulin resistance;ko00250//Alanine, aspartate and glutamate metabolism	K00820;K00820;K00820;K00820	-	GO:0004360//glutamine-fructose-6-phosphate transaminase (isomerizing) activity;GO:0097367//carbohydrate derivative binding	GO:0006002//fructose 6-phosphate metabolic process;GO:0006047//UDP-N-acetylglucosamine metabolic process;GO:0006048//UDP-N-acetylglucosamine biosynthetic process;GO:0006487//protein N-linked glycosylation;GO:0006541//glutamine metabolic process;GO:1990830//cellular response to leukemia inhibitory factor
MSTRG.25033.1	Sfur004784	-0.962626488	0.002069068	Gfpt2	Glutamine--fructose-6-phosphate aminotransferase [isomerizing] 2	Metabolism;Metabolism;Human Diseases;Metabolism	Global and overview maps;Carbohydrate metabolism;Endocrine and metabolic diseases;Amino acid metabolism	ko01100//Metabolic pathways;ko00520//Amino sugar and nucleotide sugar metabolism;ko04931//Insulin resistance;ko00250//Alanine, aspartate and glutamate metabolism	K00820;K00820;K00820;K00820	-	GO:0004360//glutamine-fructose-6-phosphate transaminase (isomerizing) activity;GO:0097367//carbohydrate derivative binding	GO:0006002//fructose 6-phosphate metabolic process;GO:0006047//UDP-N-acetylglucosamine metabolic process;GO:0006048//UDP-N-acetylglucosamine biosynthetic process;GO:0006487//protein N-linked glycosylation;GO:0006541//glutamine metabolic process;GO:1990830//cellular response to leukemia inhibitory factor
MSTRG.2257.2	Sfur004784	-0.992980741	7.37E-05	Gfpt2	Glutamine--fructose-6-phosphate aminotransferase [isomerizing] 2	Metabolism;Metabolism;Human Diseases;Metabolism	Global and overview maps;Carbohydrate metabolism;Endocrine and metabolic diseases;Amino acid metabolism	ko01100//Metabolic pathways;ko00520//Amino sugar and nucleotide sugar metabolism;ko04931//Insulin resistance;ko00250//Alanine, aspartate and glutamate metabolism	K00820;K00820;K00820;K00820	-	GO:0004360//glutamine-fructose-6-phosphate transaminase (isomerizing) activity;GO:0097367//carbohydrate derivative binding	GO:0006002//fructose 6-phosphate metabolic process;GO:0006047//UDP-N-acetylglucosamine metabolic process;GO:0006048//UDP-N-acetylglucosamine biosynthetic process;GO:0006487//protein N-linked glycosylation;GO:0006541//glutamine metabolic process;GO:1990830//cellular response to leukemia inhibitory factor
MSTRG.31755.1	Sfur004784	-0.954314925	0.003083014	Gfpt2	Glutamine--fructose-6-phosphate aminotransferase [isomerizing] 2	Metabolism;Metabolism;Human Diseases;Metabolism	Global and overview maps;Carbohydrate metabolism;Endocrine and metabolic diseases;Amino acid metabolism	ko01100//Metabolic pathways;ko00520//Amino sugar and nucleotide sugar metabolism;ko04931//Insulin resistance;ko00250//Alanine, aspartate and glutamate metabolism	K00820;K00820;K00820;K00820	-	GO:0004360//glutamine-fructose-6-phosphate transaminase (isomerizing) activity;GO:0097367//carbohydrate derivative binding	GO:0006002//fructose 6-phosphate metabolic process;GO:0006047//UDP-N-acetylglucosamine metabolic process;GO:0006048//UDP-N-acetylglucosamine biosynthetic process;GO:0006487//protein N-linked glycosylation;GO:0006541//glutamine metabolic process;GO:1990830//cellular response to leukemia inhibitory factor
MSTRG.11192.1	Sfur004784	0.961779345	0.002163311	Gfpt2	Glutamine--fructose-6-phosphate aminotransferase [isomerizing] 2	Metabolism;Metabolism;Human Diseases;Metabolism	Global and overview maps;Carbohydrate metabolism;Endocrine and metabolic diseases;Amino acid metabolism	ko01100//Metabolic pathways;ko00520//Amino sugar and nucleotide sugar metabolism;ko04931//Insulin resistance;ko00250//Alanine, aspartate and glutamate metabolism	K00820;K00820;K00820;K00820	-	GO:0004360//glutamine-fructose-6-phosphate transaminase (isomerizing) activity;GO:0097367//carbohydrate derivative binding	GO:0006002//fructose 6-phosphate metabolic process;GO:0006047//UDP-N-acetylglucosamine metabolic process;GO:0006048//UDP-N-acetylglucosamine biosynthetic process;GO:0006487//protein N-linked glycosylation;GO:0006541//glutamine metabolic process;GO:1990830//cellular response to leukemia inhibitory factor
MSTRG.12600.5	Sfur004784	-0.955175462	0.002968827	Gfpt2	Glutamine--fructose-6-phosphate aminotransferase [isomerizing] 2	Metabolism;Metabolism;Human Diseases;Metabolism	Global and overview maps;Carbohydrate metabolism;Endocrine and metabolic diseases;Amino acid metabolism	ko01100//Metabolic pathways;ko00520//Amino sugar and nucleotide sugar metabolism;ko04931//Insulin resistance;ko00250//Alanine, aspartate and glutamate metabolism	K00820;K00820;K00820;K00820	-	GO:0004360//glutamine-fructose-6-phosphate transaminase (isomerizing) activity;GO:0097367//carbohydrate derivative binding	GO:0006002//fructose 6-phosphate metabolic process;GO:0006047//UDP-N-acetylglucosamine metabolic process;GO:0006048//UDP-N-acetylglucosamine biosynthetic process;GO:0006487//protein N-linked glycosylation;GO:0006541//glutamine metabolic process;GO:1990830//cellular response to leukemia inhibitory factor
MSTRG.21077.2	Sfur004784	-0.961018968	0.002249665	Gfpt2	Glutamine--fructose-6-phosphate aminotransferase [isomerizing] 2	Metabolism;Metabolism;Human Diseases;Metabolism	Global and overview maps;Carbohydrate metabolism;Endocrine and metabolic diseases;Amino acid metabolism	ko01100//Metabolic pathways;ko00520//Amino sugar and nucleotide sugar metabolism;ko04931//Insulin resistance;ko00250//Alanine, aspartate and glutamate metabolism	K00820;K00820;K00820;K00820	-	GO:0004360//glutamine-fructose-6-phosphate transaminase (isomerizing) activity;GO:0097367//carbohydrate derivative binding	GO:0006002//fructose 6-phosphate metabolic process;GO:0006047//UDP-N-acetylglucosamine metabolic process;GO:0006048//UDP-N-acetylglucosamine biosynthetic process;GO:0006487//protein N-linked glycosylation;GO:0006541//glutamine metabolic process;GO:1990830//cellular response to leukemia inhibitory factor
MSTRG.27249.1	Sfur004784	-0.955092409	0.002979755	Gfpt2	Glutamine--fructose-6-phosphate aminotransferase [isomerizing] 2	Metabolism;Metabolism;Human Diseases;Metabolism	Global and overview maps;Carbohydrate metabolism;Endocrine and metabolic diseases;Amino acid metabolism	ko01100//Metabolic pathways;ko00520//Amino sugar and nucleotide sugar metabolism;ko04931//Insulin resistance;ko00250//Alanine, aspartate and glutamate metabolism	K00820;K00820;K00820;K00820	-	GO:0004360//glutamine-fructose-6-phosphate transaminase (isomerizing) activity;GO:0097367//carbohydrate derivative binding	GO:0006002//fructose 6-phosphate metabolic process;GO:0006047//UDP-N-acetylglucosamine metabolic process;GO:0006048//UDP-N-acetylglucosamine biosynthetic process;GO:0006487//protein N-linked glycosylation;GO:0006541//glutamine metabolic process;GO:1990830//cellular response to leukemia inhibitory factor
MSTRG.25078.1	Sfur004784	0.987253737	0.000242665	Gfpt2	Glutamine--fructose-6-phosphate aminotransferase [isomerizing] 2	Metabolism;Metabolism;Human Diseases;Metabolism	Global and overview maps;Carbohydrate metabolism;Endocrine and metabolic diseases;Amino acid metabolism	ko01100//Metabolic pathways;ko00520//Amino sugar and nucleotide sugar metabolism;ko04931//Insulin resistance;ko00250//Alanine, aspartate and glutamate metabolism	K00820;K00820;K00820;K00820	-	GO:0004360//glutamine-fructose-6-phosphate transaminase (isomerizing) activity;GO:0097367//carbohydrate derivative binding	GO:0006002//fructose 6-phosphate metabolic process;GO:0006047//UDP-N-acetylglucosamine metabolic process;GO:0006048//UDP-N-acetylglucosamine biosynthetic process;GO:0006487//protein N-linked glycosylation;GO:0006541//glutamine metabolic process;GO:1990830//cellular response to leukemia inhibitory factor
MSTRG.10233.1	Sfur004784	0.958494806	0.002548272	Gfpt2	Glutamine--fructose-6-phosphate aminotransferase [isomerizing] 2	Metabolism;Metabolism;Human Diseases;Metabolism	Global and overview maps;Carbohydrate metabolism;Endocrine and metabolic diseases;Amino acid metabolism	ko01100//Metabolic pathways;ko00520//Amino sugar and nucleotide sugar metabolism;ko04931//Insulin resistance;ko00250//Alanine, aspartate and glutamate metabolism	K00820;K00820;K00820;K00820	-	GO:0004360//glutamine-fructose-6-phosphate transaminase (isomerizing) activity;GO:0097367//carbohydrate derivative binding	GO:0006002//fructose 6-phosphate metabolic process;GO:0006047//UDP-N-acetylglucosamine metabolic process;GO:0006048//UDP-N-acetylglucosamine biosynthetic process;GO:0006487//protein N-linked glycosylation;GO:0006541//glutamine metabolic process;GO:1990830//cellular response to leukemia inhibitory factor
MSTRG.38382.2	Sfur004784	-0.965700508	0.001744507	Gfpt2	Glutamine--fructose-6-phosphate aminotransferase [isomerizing] 2	Metabolism;Metabolism;Human Diseases;Metabolism	Global and overview maps;Carbohydrate metabolism;Endocrine and metabolic diseases;Amino acid metabolism	ko01100//Metabolic pathways;ko00520//Amino sugar and nucleotide sugar metabolism;ko04931//Insulin resistance;ko00250//Alanine, aspartate and glutamate metabolism	K00820;K00820;K00820;K00820	-	GO:0004360//glutamine-fructose-6-phosphate transaminase (isomerizing) activity;GO:0097367//carbohydrate derivative binding	GO:0006002//fructose 6-phosphate metabolic process;GO:0006047//UDP-N-acetylglucosamine metabolic process;GO:0006048//UDP-N-acetylglucosamine biosynthetic process;GO:0006487//protein N-linked glycosylation;GO:0006541//glutamine metabolic process;GO:1990830//cellular response to leukemia inhibitory factor
MSTRG.15631.1	Sfur004784	0.964318503	0.00188704	Gfpt2	Glutamine--fructose-6-phosphate aminotransferase [isomerizing] 2	Metabolism;Metabolism;Human Diseases;Metabolism	Global and overview maps;Carbohydrate metabolism;Endocrine and metabolic diseases;Amino acid metabolism	ko01100//Metabolic pathways;ko00520//Amino sugar and nucleotide sugar metabolism;ko04931//Insulin resistance;ko00250//Alanine, aspartate and glutamate metabolism	K00820;K00820;K00820;K00820	-	GO:0004360//glutamine-fructose-6-phosphate transaminase (isomerizing) activity;GO:0097367//carbohydrate derivative binding	GO:0006002//fructose 6-phosphate metabolic process;GO:0006047//UDP-N-acetylglucosamine metabolic process;GO:0006048//UDP-N-acetylglucosamine biosynthetic process;GO:0006487//protein N-linked glycosylation;GO:0006541//glutamine metabolic process;GO:1990830//cellular response to leukemia inhibitory factor
MSTRG.8328.3	Sfur004784	-0.969148437	0.001413046	Gfpt2	Glutamine--fructose-6-phosphate aminotransferase [isomerizing] 2	Metabolism;Metabolism;Human Diseases;Metabolism	Global and overview maps;Carbohydrate metabolism;Endocrine and metabolic diseases;Amino acid metabolism	ko01100//Metabolic pathways;ko00520//Amino sugar and nucleotide sugar metabolism;ko04931//Insulin resistance;ko00250//Alanine, aspartate and glutamate metabolism	K00820;K00820;K00820;K00820	-	GO:0004360//glutamine-fructose-6-phosphate transaminase (isomerizing) activity;GO:0097367//carbohydrate derivative binding	GO:0006002//fructose 6-phosphate metabolic process;GO:0006047//UDP-N-acetylglucosamine metabolic process;GO:0006048//UDP-N-acetylglucosamine biosynthetic process;GO:0006487//protein N-linked glycosylation;GO:0006541//glutamine metabolic process;GO:1990830//cellular response to leukemia inhibitory factor
MSTRG.28387.1	Sfur004784	-0.984713837	0.000348714	Gfpt2	Glutamine--fructose-6-phosphate aminotransferase [isomerizing] 2	Metabolism;Metabolism;Human Diseases;Metabolism	Global and overview maps;Carbohydrate metabolism;Endocrine and metabolic diseases;Amino acid metabolism	ko01100//Metabolic pathways;ko00520//Amino sugar and nucleotide sugar metabolism;ko04931//Insulin resistance;ko00250//Alanine, aspartate and glutamate metabolism	K00820;K00820;K00820;K00820	-	GO:0004360//glutamine-fructose-6-phosphate transaminase (isomerizing) activity;GO:0097367//carbohydrate derivative binding	GO:0006002//fructose 6-phosphate metabolic process;GO:0006047//UDP-N-acetylglucosamine metabolic process;GO:0006048//UDP-N-acetylglucosamine biosynthetic process;GO:0006487//protein N-linked glycosylation;GO:0006541//glutamine metabolic process;GO:1990830//cellular response to leukemia inhibitory factor
MSTRG.8257.1	Sfur004784	-0.975896948	0.000864434	Gfpt2	Glutamine--fructose-6-phosphate aminotransferase [isomerizing] 2	Metabolism;Metabolism;Human Diseases;Metabolism	Global and overview maps;Carbohydrate metabolism;Endocrine and metabolic diseases;Amino acid metabolism	ko01100//Metabolic pathways;ko00520//Amino sugar and nucleotide sugar metabolism;ko04931//Insulin resistance;ko00250//Alanine, aspartate and glutamate metabolism	K00820;K00820;K00820;K00820	-	GO:0004360//glutamine-fructose-6-phosphate transaminase (isomerizing) activity;GO:0097367//carbohydrate derivative binding	GO:0006002//fructose 6-phosphate metabolic process;GO:0006047//UDP-N-acetylglucosamine metabolic process;GO:0006048//UDP-N-acetylglucosamine biosynthetic process;GO:0006487//protein N-linked glycosylation;GO:0006541//glutamine metabolic process;GO:1990830//cellular response to leukemia inhibitory factor
MSTRG.23163.4	Sfur004784	-0.966717632	0.00164314	Gfpt2	Glutamine--fructose-6-phosphate aminotransferase [isomerizing] 2	Metabolism;Metabolism;Human Diseases;Metabolism	Global and overview maps;Carbohydrate metabolism;Endocrine and metabolic diseases;Amino acid metabolism	ko01100//Metabolic pathways;ko00520//Amino sugar and nucleotide sugar metabolism;ko04931//Insulin resistance;ko00250//Alanine, aspartate and glutamate metabolism	K00820;K00820;K00820;K00820	-	GO:0004360//glutamine-fructose-6-phosphate transaminase (isomerizing) activity;GO:0097367//carbohydrate derivative binding	GO:0006002//fructose 6-phosphate metabolic process;GO:0006047//UDP-N-acetylglucosamine metabolic process;GO:0006048//UDP-N-acetylglucosamine biosynthetic process;GO:0006487//protein N-linked glycosylation;GO:0006541//glutamine metabolic process;GO:1990830//cellular response to leukemia inhibitory factor
MSTRG.14436.1	Sfur004784	-0.981602122	0.000504609	Gfpt2	Glutamine--fructose-6-phosphate aminotransferase [isomerizing] 2	Metabolism;Metabolism;Human Diseases;Metabolism	Global and overview maps;Carbohydrate metabolism;Endocrine and metabolic diseases;Amino acid metabolism	ko01100//Metabolic pathways;ko00520//Amino sugar and nucleotide sugar metabolism;ko04931//Insulin resistance;ko00250//Alanine, aspartate and glutamate metabolism	K00820;K00820;K00820;K00820	-	GO:0004360//glutamine-fructose-6-phosphate transaminase (isomerizing) activity;GO:0097367//carbohydrate derivative binding	GO:0006002//fructose 6-phosphate metabolic process;GO:0006047//UDP-N-acetylglucosamine metabolic process;GO:0006048//UDP-N-acetylglucosamine biosynthetic process;GO:0006487//protein N-linked glycosylation;GO:0006541//glutamine metabolic process;GO:1990830//cellular response to leukemia inhibitory factor
MSTRG.39618.1	Sfur004784	-0.9502262	0.003654491	Gfpt2	Glutamine--fructose-6-phosphate aminotransferase [isomerizing] 2	Metabolism;Metabolism;Human Diseases;Metabolism	Global and overview maps;Carbohydrate metabolism;Endocrine and metabolic diseases;Amino acid metabolism	ko01100//Metabolic pathways;ko00520//Amino sugar and nucleotide sugar metabolism;ko04931//Insulin resistance;ko00250//Alanine, aspartate and glutamate metabolism	K00820;K00820;K00820;K00820	-	GO:0004360//glutamine-fructose-6-phosphate transaminase (isomerizing) activity;GO:0097367//carbohydrate derivative binding	GO:0006002//fructose 6-phosphate metabolic process;GO:0006047//UDP-N-acetylglucosamine metabolic process;GO:0006048//UDP-N-acetylglucosamine biosynthetic process;GO:0006487//protein N-linked glycosylation;GO:0006541//glutamine metabolic process;GO:1990830//cellular response to leukemia inhibitory factor
MSTRG.24855.2	Sfur004784	-0.953109025	0.003246594	Gfpt2	Glutamine--fructose-6-phosphate aminotransferase [isomerizing] 2	Metabolism;Metabolism;Human Diseases;Metabolism	Global and overview maps;Carbohydrate metabolism;Endocrine and metabolic diseases;Amino acid metabolism	ko01100//Metabolic pathways;ko00520//Amino sugar and nucleotide sugar metabolism;ko04931//Insulin resistance;ko00250//Alanine, aspartate and glutamate metabolism	K00820;K00820;K00820;K00820	-	GO:0004360//glutamine-fructose-6-phosphate transaminase (isomerizing) activity;GO:0097367//carbohydrate derivative binding	GO:0006002//fructose 6-phosphate metabolic process;GO:0006047//UDP-N-acetylglucosamine metabolic process;GO:0006048//UDP-N-acetylglucosamine biosynthetic process;GO:0006487//protein N-linked glycosylation;GO:0006541//glutamine metabolic process;GO:1990830//cellular response to leukemia inhibitory factor
MSTRG.18098.3	Sfur004784	-0.956124094	0.00284541	Gfpt2	Glutamine--fructose-6-phosphate aminotransferase [isomerizing] 2	Metabolism;Metabolism;Human Diseases;Metabolism	Global and overview maps;Carbohydrate metabolism;Endocrine and metabolic diseases;Amino acid metabolism	ko01100//Metabolic pathways;ko00520//Amino sugar and nucleotide sugar metabolism;ko04931//Insulin resistance;ko00250//Alanine, aspartate and glutamate metabolism	K00820;K00820;K00820;K00820	-	GO:0004360//glutamine-fructose-6-phosphate transaminase (isomerizing) activity;GO:0097367//carbohydrate derivative binding	GO:0006002//fructose 6-phosphate metabolic process;GO:0006047//UDP-N-acetylglucosamine metabolic process;GO:0006048//UDP-N-acetylglucosamine biosynthetic process;GO:0006487//protein N-linked glycosylation;GO:0006541//glutamine metabolic process;GO:1990830//cellular response to leukemia inhibitory factor
MSTRG.3731.1	Sfur004784	-0.960281708	0.002334985	Gfpt2	Glutamine--fructose-6-phosphate aminotransferase [isomerizing] 2	Metabolism;Metabolism;Human Diseases;Metabolism	Global and overview maps;Carbohydrate metabolism;Endocrine and metabolic diseases;Amino acid metabolism	ko01100//Metabolic pathways;ko00520//Amino sugar and nucleotide sugar metabolism;ko04931//Insulin resistance;ko00250//Alanine, aspartate and glutamate metabolism	K00820;K00820;K00820;K00820	-	GO:0004360//glutamine-fructose-6-phosphate transaminase (isomerizing) activity;GO:0097367//carbohydrate derivative binding	GO:0006002//fructose 6-phosphate metabolic process;GO:0006047//UDP-N-acetylglucosamine metabolic process;GO:0006048//UDP-N-acetylglucosamine biosynthetic process;GO:0006487//protein N-linked glycosylation;GO:0006541//glutamine metabolic process;GO:1990830//cellular response to leukemia inhibitory factor
MSTRG.12497.1	Sfur004784	-0.960761089	0.00227933	Gfpt2	Glutamine--fructose-6-phosphate aminotransferase [isomerizing] 2	Metabolism;Metabolism;Human Diseases;Metabolism	Global and overview maps;Carbohydrate metabolism;Endocrine and metabolic diseases;Amino acid metabolism	ko01100//Metabolic pathways;ko00520//Amino sugar and nucleotide sugar metabolism;ko04931//Insulin resistance;ko00250//Alanine, aspartate and glutamate metabolism	K00820;K00820;K00820;K00820	-	GO:0004360//glutamine-fructose-6-phosphate transaminase (isomerizing) activity;GO:0097367//carbohydrate derivative binding	GO:0006002//fructose 6-phosphate metabolic process;GO:0006047//UDP-N-acetylglucosamine metabolic process;GO:0006048//UDP-N-acetylglucosamine biosynthetic process;GO:0006487//protein N-linked glycosylation;GO:0006541//glutamine metabolic process;GO:1990830//cellular response to leukemia inhibitory factor
MSTRG.21953.1	Sfur004784	-0.956042398	0.002855937	Gfpt2	Glutamine--fructose-6-phosphate aminotransferase [isomerizing] 2	Metabolism;Metabolism;Human Diseases;Metabolism	Global and overview maps;Carbohydrate metabolism;Endocrine and metabolic diseases;Amino acid metabolism	ko01100//Metabolic pathways;ko00520//Amino sugar and nucleotide sugar metabolism;ko04931//Insulin resistance;ko00250//Alanine, aspartate and glutamate metabolism	K00820;K00820;K00820;K00820	-	GO:0004360//glutamine-fructose-6-phosphate transaminase (isomerizing) activity;GO:0097367//carbohydrate derivative binding	GO:0006002//fructose 6-phosphate metabolic process;GO:0006047//UDP-N-acetylglucosamine metabolic process;GO:0006048//UDP-N-acetylglucosamine biosynthetic process;GO:0006487//protein N-linked glycosylation;GO:0006541//glutamine metabolic process;GO:1990830//cellular response to leukemia inhibitory factor
MSTRG.23481.1	Sfur004784	-0.952081615	0.003389243	Gfpt2	Glutamine--fructose-6-phosphate aminotransferase [isomerizing] 2	Metabolism;Metabolism;Human Diseases;Metabolism	Global and overview maps;Carbohydrate metabolism;Endocrine and metabolic diseases;Amino acid metabolism	ko01100//Metabolic pathways;ko00520//Amino sugar and nucleotide sugar metabolism;ko04931//Insulin resistance;ko00250//Alanine, aspartate and glutamate metabolism	K00820;K00820;K00820;K00820	-	GO:0004360//glutamine-fructose-6-phosphate transaminase (isomerizing) activity;GO:0097367//carbohydrate derivative binding	GO:0006002//fructose 6-phosphate metabolic process;GO:0006047//UDP-N-acetylglucosamine metabolic process;GO:0006048//UDP-N-acetylglucosamine biosynthetic process;GO:0006487//protein N-linked glycosylation;GO:0006541//glutamine metabolic process;GO:1990830//cellular response to leukemia inhibitory factor
MSTRG.34503.1	Sfur004784	-0.971025946	0.001247082	Gfpt2	Glutamine--fructose-6-phosphate aminotransferase [isomerizing] 2	Metabolism;Metabolism;Human Diseases;Metabolism	Global and overview maps;Carbohydrate metabolism;Endocrine and metabolic diseases;Amino acid metabolism	ko01100//Metabolic pathways;ko00520//Amino sugar and nucleotide sugar metabolism;ko04931//Insulin resistance;ko00250//Alanine, aspartate and glutamate metabolism	K00820;K00820;K00820;K00820	-	GO:0004360//glutamine-fructose-6-phosphate transaminase (isomerizing) activity;GO:0097367//carbohydrate derivative binding	GO:0006002//fructose 6-phosphate metabolic process;GO:0006047//UDP-N-acetylglucosamine metabolic process;GO:0006048//UDP-N-acetylglucosamine biosynthetic process;GO:0006487//protein N-linked glycosylation;GO:0006541//glutamine metabolic process;GO:1990830//cellular response to leukemia inhibitory factor
MSTRG.1236.2	Sfur004784	-0.96967597	0.001365378	Gfpt2	Glutamine--fructose-6-phosphate aminotransferase [isomerizing] 2	Metabolism;Metabolism;Human Diseases;Metabolism	Global and overview maps;Carbohydrate metabolism;Endocrine and metabolic diseases;Amino acid metabolism	ko01100//Metabolic pathways;ko00520//Amino sugar and nucleotide sugar metabolism;ko04931//Insulin resistance;ko00250//Alanine, aspartate and glutamate metabolism	K00820;K00820;K00820;K00820	-	GO:0004360//glutamine-fructose-6-phosphate transaminase (isomerizing) activity;GO:0097367//carbohydrate derivative binding	GO:0006002//fructose 6-phosphate metabolic process;GO:0006047//UDP-N-acetylglucosamine metabolic process;GO:0006048//UDP-N-acetylglucosamine biosynthetic process;GO:0006487//protein N-linked glycosylation;GO:0006541//glutamine metabolic process;GO:1990830//cellular response to leukemia inhibitory factor
MSTRG.39610.1	Sfur004784	-0.965578308	0.001756887	Gfpt2	Glutamine--fructose-6-phosphate aminotransferase [isomerizing] 2	Metabolism;Metabolism;Human Diseases;Metabolism	Global and overview maps;Carbohydrate metabolism;Endocrine and metabolic diseases;Amino acid metabolism	ko01100//Metabolic pathways;ko00520//Amino sugar and nucleotide sugar metabolism;ko04931//Insulin resistance;ko00250//Alanine, aspartate and glutamate metabolism	K00820;K00820;K00820;K00820	-	GO:0004360//glutamine-fructose-6-phosphate transaminase (isomerizing) activity;GO:0097367//carbohydrate derivative binding	GO:0006002//fructose 6-phosphate metabolic process;GO:0006047//UDP-N-acetylglucosamine metabolic process;GO:0006048//UDP-N-acetylglucosamine biosynthetic process;GO:0006487//protein N-linked glycosylation;GO:0006541//glutamine metabolic process;GO:1990830//cellular response to leukemia inhibitory factor
MSTRG.11682.1	Sfur004784	-0.963229238	0.002003275	Gfpt2	Glutamine--fructose-6-phosphate aminotransferase [isomerizing] 2	Metabolism;Metabolism;Human Diseases;Metabolism	Global and overview maps;Carbohydrate metabolism;Endocrine and metabolic diseases;Amino acid metabolism	ko01100//Metabolic pathways;ko00520//Amino sugar and nucleotide sugar metabolism;ko04931//Insulin resistance;ko00250//Alanine, aspartate and glutamate metabolism	K00820;K00820;K00820;K00820	-	GO:0004360//glutamine-fructose-6-phosphate transaminase (isomerizing) activity;GO:0097367//carbohydrate derivative binding	GO:0006002//fructose 6-phosphate metabolic process;GO:0006047//UDP-N-acetylglucosamine metabolic process;GO:0006048//UDP-N-acetylglucosamine biosynthetic process;GO:0006487//protein N-linked glycosylation;GO:0006541//glutamine metabolic process;GO:1990830//cellular response to leukemia inhibitory factor
MSTRG.15355.7	Sfur004784	-0.963761797	0.001946017	Gfpt2	Glutamine--fructose-6-phosphate aminotransferase [isomerizing] 2	Metabolism;Metabolism;Human Diseases;Metabolism	Global and overview maps;Carbohydrate metabolism;Endocrine and metabolic diseases;Amino acid metabolism	ko01100//Metabolic pathways;ko00520//Amino sugar and nucleotide sugar metabolism;ko04931//Insulin resistance;ko00250//Alanine, aspartate and glutamate metabolism	K00820;K00820;K00820;K00820	-	GO:0004360//glutamine-fructose-6-phosphate transaminase (isomerizing) activity;GO:0097367//carbohydrate derivative binding	GO:0006002//fructose 6-phosphate metabolic process;GO:0006047//UDP-N-acetylglucosamine metabolic process;GO:0006048//UDP-N-acetylglucosamine biosynthetic process;GO:0006487//protein N-linked glycosylation;GO:0006541//glutamine metabolic process;GO:1990830//cellular response to leukemia inhibitory factor
MSTRG.18015.1	Sfur004784	-0.986972022	0.000253487	Gfpt2	Glutamine--fructose-6-phosphate aminotransferase [isomerizing] 2	Metabolism;Metabolism;Human Diseases;Metabolism	Global and overview maps;Carbohydrate metabolism;Endocrine and metabolic diseases;Amino acid metabolism	ko01100//Metabolic pathways;ko00520//Amino sugar and nucleotide sugar metabolism;ko04931//Insulin resistance;ko00250//Alanine, aspartate and glutamate metabolism	K00820;K00820;K00820;K00820	-	GO:0004360//glutamine-fructose-6-phosphate transaminase (isomerizing) activity;GO:0097367//carbohydrate derivative binding	GO:0006002//fructose 6-phosphate metabolic process;GO:0006047//UDP-N-acetylglucosamine metabolic process;GO:0006048//UDP-N-acetylglucosamine biosynthetic process;GO:0006487//protein N-linked glycosylation;GO:0006541//glutamine metabolic process;GO:1990830//cellular response to leukemia inhibitory factor
MSTRG.27906.1	Sfur004784	-0.966088678	0.001705468	Gfpt2	Glutamine--fructose-6-phosphate aminotransferase [isomerizing] 2	Metabolism;Metabolism;Human Diseases;Metabolism	Global and overview maps;Carbohydrate metabolism;Endocrine and metabolic diseases;Amino acid metabolism	ko01100//Metabolic pathways;ko00520//Amino sugar and nucleotide sugar metabolism;ko04931//Insulin resistance;ko00250//Alanine, aspartate and glutamate metabolism	K00820;K00820;K00820;K00820	-	GO:0004360//glutamine-fructose-6-phosphate transaminase (isomerizing) activity;GO:0097367//carbohydrate derivative binding	GO:0006002//fructose 6-phosphate metabolic process;GO:0006047//UDP-N-acetylglucosamine metabolic process;GO:0006048//UDP-N-acetylglucosamine biosynthetic process;GO:0006487//protein N-linked glycosylation;GO:0006541//glutamine metabolic process;GO:1990830//cellular response to leukemia inhibitory factor
MSTRG.20188.1	Sfur004784	-0.969543902	0.001377236	Gfpt2	Glutamine--fructose-6-phosphate aminotransferase [isomerizing] 2	Metabolism;Metabolism;Human Diseases;Metabolism	Global and overview maps;Carbohydrate metabolism;Endocrine and metabolic diseases;Amino acid metabolism	ko01100//Metabolic pathways;ko00520//Amino sugar and nucleotide sugar metabolism;ko04931//Insulin resistance;ko00250//Alanine, aspartate and glutamate metabolism	K00820;K00820;K00820;K00820	-	GO:0004360//glutamine-fructose-6-phosphate transaminase (isomerizing) activity;GO:0097367//carbohydrate derivative binding	GO:0006002//fructose 6-phosphate metabolic process;GO:0006047//UDP-N-acetylglucosamine metabolic process;GO:0006048//UDP-N-acetylglucosamine biosynthetic process;GO:0006487//protein N-linked glycosylation;GO:0006541//glutamine metabolic process;GO:1990830//cellular response to leukemia inhibitory factor
MSTRG.20583.2	Sfur004784	-0.962801256	0.002049883	Gfpt2	Glutamine--fructose-6-phosphate aminotransferase [isomerizing] 2	Metabolism;Metabolism;Human Diseases;Metabolism	Global and overview maps;Carbohydrate metabolism;Endocrine and metabolic diseases;Amino acid metabolism	ko01100//Metabolic pathways;ko00520//Amino sugar and nucleotide sugar metabolism;ko04931//Insulin resistance;ko00250//Alanine, aspartate and glutamate metabolism	K00820;K00820;K00820;K00820	-	GO:0004360//glutamine-fructose-6-phosphate transaminase (isomerizing) activity;GO:0097367//carbohydrate derivative binding	GO:0006002//fructose 6-phosphate metabolic process;GO:0006047//UDP-N-acetylglucosamine metabolic process;GO:0006048//UDP-N-acetylglucosamine biosynthetic process;GO:0006487//protein N-linked glycosylation;GO:0006541//glutamine metabolic process;GO:1990830//cellular response to leukemia inhibitory factor
MSTRG.3757.1	Sfur004784	-0.95168821	0.003444663	Gfpt2	Glutamine--fructose-6-phosphate aminotransferase [isomerizing] 2	Metabolism;Metabolism;Human Diseases;Metabolism	Global and overview maps;Carbohydrate metabolism;Endocrine and metabolic diseases;Amino acid metabolism	ko01100//Metabolic pathways;ko00520//Amino sugar and nucleotide sugar metabolism;ko04931//Insulin resistance;ko00250//Alanine, aspartate and glutamate metabolism	K00820;K00820;K00820;K00820	-	GO:0004360//glutamine-fructose-6-phosphate transaminase (isomerizing) activity;GO:0097367//carbohydrate derivative binding	GO:0006002//fructose 6-phosphate metabolic process;GO:0006047//UDP-N-acetylglucosamine metabolic process;GO:0006048//UDP-N-acetylglucosamine biosynthetic process;GO:0006487//protein N-linked glycosylation;GO:0006541//glutamine metabolic process;GO:1990830//cellular response to leukemia inhibitory factor
MSTRG.27567.5	Sfur004784	-0.976196165	0.00084319	Gfpt2	Glutamine--fructose-6-phosphate aminotransferase [isomerizing] 2	Metabolism;Metabolism;Human Diseases;Metabolism	Global and overview maps;Carbohydrate metabolism;Endocrine and metabolic diseases;Amino acid metabolism	ko01100//Metabolic pathways;ko00520//Amino sugar and nucleotide sugar metabolism;ko04931//Insulin resistance;ko00250//Alanine, aspartate and glutamate metabolism	K00820;K00820;K00820;K00820	-	GO:0004360//glutamine-fructose-6-phosphate transaminase (isomerizing) activity;GO:0097367//carbohydrate derivative binding	GO:0006002//fructose 6-phosphate metabolic process;GO:0006047//UDP-N-acetylglucosamine metabolic process;GO:0006048//UDP-N-acetylglucosamine biosynthetic process;GO:0006487//protein N-linked glycosylation;GO:0006541//glutamine metabolic process;GO:1990830//cellular response to leukemia inhibitory factor
MSTRG.6174.1	Sfur004784	-0.960402004	0.002320957	Gfpt2	Glutamine--fructose-6-phosphate aminotransferase [isomerizing] 2	Metabolism;Metabolism;Human Diseases;Metabolism	Global and overview maps;Carbohydrate metabolism;Endocrine and metabolic diseases;Amino acid metabolism	ko01100//Metabolic pathways;ko00520//Amino sugar and nucleotide sugar metabolism;ko04931//Insulin resistance;ko00250//Alanine, aspartate and glutamate metabolism	K00820;K00820;K00820;K00820	-	GO:0004360//glutamine-fructose-6-phosphate transaminase (isomerizing) activity;GO:0097367//carbohydrate derivative binding	GO:0006002//fructose 6-phosphate metabolic process;GO:0006047//UDP-N-acetylglucosamine metabolic process;GO:0006048//UDP-N-acetylglucosamine biosynthetic process;GO:0006487//protein N-linked glycosylation;GO:0006541//glutamine metabolic process;GO:1990830//cellular response to leukemia inhibitory factor
MSTRG.19942.1	Sfur004784	-0.961247633	0.002223521	Gfpt2	Glutamine--fructose-6-phosphate aminotransferase [isomerizing] 2	Metabolism;Metabolism;Human Diseases;Metabolism	Global and overview maps;Carbohydrate metabolism;Endocrine and metabolic diseases;Amino acid metabolism	ko01100//Metabolic pathways;ko00520//Amino sugar and nucleotide sugar metabolism;ko04931//Insulin resistance;ko00250//Alanine, aspartate and glutamate metabolism	K00820;K00820;K00820;K00820	-	GO:0004360//glutamine-fructose-6-phosphate transaminase (isomerizing) activity;GO:0097367//carbohydrate derivative binding	GO:0006002//fructose 6-phosphate metabolic process;GO:0006047//UDP-N-acetylglucosamine metabolic process;GO:0006048//UDP-N-acetylglucosamine biosynthetic process;GO:0006487//protein N-linked glycosylation;GO:0006541//glutamine metabolic process;GO:1990830//cellular response to leukemia inhibitory factor
MSTRG.28461.2	Sfur004784	-0.974359477	0.000977726	Gfpt2	Glutamine--fructose-6-phosphate aminotransferase [isomerizing] 2	Metabolism;Metabolism;Human Diseases;Metabolism	Global and overview maps;Carbohydrate metabolism;Endocrine and metabolic diseases;Amino acid metabolism	ko01100//Metabolic pathways;ko00520//Amino sugar and nucleotide sugar metabolism;ko04931//Insulin resistance;ko00250//Alanine, aspartate and glutamate metabolism	K00820;K00820;K00820;K00820	-	GO:0004360//glutamine-fructose-6-phosphate transaminase (isomerizing) activity;GO:0097367//carbohydrate derivative binding	GO:0006002//fructose 6-phosphate metabolic process;GO:0006047//UDP-N-acetylglucosamine metabolic process;GO:0006048//UDP-N-acetylglucosamine biosynthetic process;GO:0006487//protein N-linked glycosylation;GO:0006541//glutamine metabolic process;GO:1990830//cellular response to leukemia inhibitory factor
MSTRG.37964.2	Sfur004784	-0.96608346	0.00170599	Gfpt2	Glutamine--fructose-6-phosphate aminotransferase [isomerizing] 2	Metabolism;Metabolism;Human Diseases;Metabolism	Global and overview maps;Carbohydrate metabolism;Endocrine and metabolic diseases;Amino acid metabolism	ko01100//Metabolic pathways;ko00520//Amino sugar and nucleotide sugar metabolism;ko04931//Insulin resistance;ko00250//Alanine, aspartate and glutamate metabolism	K00820;K00820;K00820;K00820	-	GO:0004360//glutamine-fructose-6-phosphate transaminase (isomerizing) activity;GO:0097367//carbohydrate derivative binding	GO:0006002//fructose 6-phosphate metabolic process;GO:0006047//UDP-N-acetylglucosamine metabolic process;GO:0006048//UDP-N-acetylglucosamine biosynthetic process;GO:0006487//protein N-linked glycosylation;GO:0006541//glutamine metabolic process;GO:1990830//cellular response to leukemia inhibitory factor
MSTRG.24164.3	Sfur004784	-0.963751343	0.001947133	Gfpt2	Glutamine--fructose-6-phosphate aminotransferase [isomerizing] 2	Metabolism;Metabolism;Human Diseases;Metabolism	Global and overview maps;Carbohydrate metabolism;Endocrine and metabolic diseases;Amino acid metabolism	ko01100//Metabolic pathways;ko00520//Amino sugar and nucleotide sugar metabolism;ko04931//Insulin resistance;ko00250//Alanine, aspartate and glutamate metabolism	K00820;K00820;K00820;K00820	-	GO:0004360//glutamine-fructose-6-phosphate transaminase (isomerizing) activity;GO:0097367//carbohydrate derivative binding	GO:0006002//fructose 6-phosphate metabolic process;GO:0006047//UDP-N-acetylglucosamine metabolic process;GO:0006048//UDP-N-acetylglucosamine biosynthetic process;GO:0006487//protein N-linked glycosylation;GO:0006541//glutamine metabolic process;GO:1990830//cellular response to leukemia inhibitory factor
MSTRG.10391.1	Sfur004784	-0.956677181	0.002774644	Gfpt2	Glutamine--fructose-6-phosphate aminotransferase [isomerizing] 2	Metabolism;Metabolism;Human Diseases;Metabolism	Global and overview maps;Carbohydrate metabolism;Endocrine and metabolic diseases;Amino acid metabolism	ko01100//Metabolic pathways;ko00520//Amino sugar and nucleotide sugar metabolism;ko04931//Insulin resistance;ko00250//Alanine, aspartate and glutamate metabolism	K00820;K00820;K00820;K00820	-	GO:0004360//glutamine-fructose-6-phosphate transaminase (isomerizing) activity;GO:0097367//carbohydrate derivative binding	GO:0006002//fructose 6-phosphate metabolic process;GO:0006047//UDP-N-acetylglucosamine metabolic process;GO:0006048//UDP-N-acetylglucosamine biosynthetic process;GO:0006487//protein N-linked glycosylation;GO:0006541//glutamine metabolic process;GO:1990830//cellular response to leukemia inhibitory factor
MSTRG.16086.1	Sfur002233	-0.953938585	0.003133618	HK1	Hexokinase	Metabolism;Metabolism;Human Diseases;Organismal Systems;Metabolism;Environmental Information Processing;Metabolism;Human Diseases;Metabolism;Metabolism;Human Diseases;Metabolism;Organismal Systems;Metabolism	Global and overview maps;Global and overview maps;Infectious diseases;Endocrine system;Carbohydrate metabolism;Signal transduction;Carbohydrate metabolism;Cancers;Carbohydrate metabolism;Carbohydrate metabolism;Endocrine and metabolic diseases;Carbohydrate metabolism;Digestive system;Biosynthesis of other secondary metabolites	ko01100//Metabolic pathways;ko01200//Carbon metabolism;ko05131//Shigellosis;ko04910//Insulin signaling pathway;ko00520//Amino sugar and nucleotide sugar metabolism;ko04066//HIF-1 signaling pathway;ko00010//Glycolysis / Gluconeogenesis;ko05230//Central carbon metabolism in cancer;ko00500//Starch and sucrose metabolism;ko00052//Galactose metabolism;ko04930//Type II diabetes mellitus;ko00051//Fructo…	K00844;K00844;K00844;K00844;K00844;K00844;K00844;K00844;K00844;K00844;K00844;K00844;K00844;K00844	-	GO:0004396//hexokinase activity;GO:0005524//ATP binding;GO:0005536//glucose binding	GO:0001678//cellular glucose homeostasis;GO:0006096//glycolytic process;GO:0019318//hexose metabolic process
MSTRG.16087.1	Sfur002233	-0.957883931	0.002623293	HK1	Hexokinase	Metabolism;Metabolism;Human Diseases;Organismal Systems;Metabolism;Environmental Information Processing;Metabolism;Human Diseases;Metabolism;Metabolism;Human Diseases;Metabolism;Organismal Systems;Metabolism	Global and overview maps;Global and overview maps;Infectious diseases;Endocrine system;Carbohydrate metabolism;Signal transduction;Carbohydrate metabolism;Cancers;Carbohydrate metabolism;Carbohydrate metabolism;Endocrine and metabolic diseases;Carbohydrate metabolism;Digestive system;Biosynthesis of other secondary metabolites	ko01100//Metabolic pathways;ko01200//Carbon metabolism;ko05131//Shigellosis;ko04910//Insulin signaling pathway;ko00520//Amino sugar and nucleotide sugar metabolism;ko04066//HIF-1 signaling pathway;ko00010//Glycolysis / Gluconeogenesis;ko05230//Central carbon metabolism in cancer;ko00500//Starch and sucrose metabolism;ko00052//Galactose metabolism;ko04930//Type II diabetes mellitus;ko00051//Fructo…	K00844;K00844;K00844;K00844;K00844;K00844;K00844;K00844;K00844;K00844;K00844;K00844;K00844;K00844	-	GO:0004396//hexokinase activity;GO:0005524//ATP binding;GO:0005536//glucose binding	GO:0001678//cellular glucose homeostasis;GO:0006096//glycolytic process;GO:0019318//hexose metabolic process
MSTRG.19835.2	Sfur002233	0.9939406	5.50E-05	HK1	Hexokinase	Metabolism;Metabolism;Human Diseases;Organismal Systems;Metabolism;Environmental Information Processing;Metabolism;Human Diseases;Metabolism;Metabolism;Human Diseases;Metabolism;Organismal Systems;Metabolism	Global and overview maps;Global and overview maps;Infectious diseases;Endocrine system;Carbohydrate metabolism;Signal transduction;Carbohydrate metabolism;Cancers;Carbohydrate metabolism;Carbohydrate metabolism;Endocrine and metabolic diseases;Carbohydrate metabolism;Digestive system;Biosynthesis of other secondary metabolites	ko01100//Metabolic pathways;ko01200//Carbon metabolism;ko05131//Shigellosis;ko04910//Insulin signaling pathway;ko00520//Amino sugar and nucleotide sugar metabolism;ko04066//HIF-1 signaling pathway;ko00010//Glycolysis / Gluconeogenesis;ko05230//Central carbon metabolism in cancer;ko00500//Starch and sucrose metabolism;ko00052//Galactose metabolism;ko04930//Type II diabetes mellitus;ko00051//Fructo…	K00844;K00844;K00844;K00844;K00844;K00844;K00844;K00844;K00844;K00844;K00844;K00844;K00844;K00844	-	GO:0004396//hexokinase activity;GO:0005524//ATP binding;GO:0005536//glucose binding	GO:0001678//cellular glucose homeostasis;GO:0006096//glycolytic process;GO:0019318//hexose metabolic process
MSTRG.8295.1	Sfur002233	-0.956370321	0.002813798	HK1	Hexokinase	Metabolism;Metabolism;Human Diseases;Organismal Systems;Metabolism;Environmental Information Processing;Metabolism;Human Diseases;Metabolism;Metabolism;Human Diseases;Metabolism;Organismal Systems;Metabolism	Global and overview maps;Global and overview maps;Infectious diseases;Endocrine system;Carbohydrate metabolism;Signal transduction;Carbohydrate metabolism;Cancers;Carbohydrate metabolism;Carbohydrate metabolism;Endocrine and metabolic diseases;Carbohydrate metabolism;Digestive system;Biosynthesis of other secondary metabolites	ko01100//Metabolic pathways;ko01200//Carbon metabolism;ko05131//Shigellosis;ko04910//Insulin signaling pathway;ko00520//Amino sugar and nucleotide sugar metabolism;ko04066//HIF-1 signaling pathway;ko00010//Glycolysis / Gluconeogenesis;ko05230//Central carbon metabolism in cancer;ko00500//Starch and sucrose metabolism;ko00052//Galactose metabolism;ko04930//Type II diabetes mellitus;ko00051//Fructo…	K00844;K00844;K00844;K00844;K00844;K00844;K00844;K00844;K00844;K00844;K00844;K00844;K00844;K00844	-	GO:0004396//hexokinase activity;GO:0005524//ATP binding;GO:0005536//glucose binding	GO:0001678//cellular glucose homeostasis;GO:0006096//glycolytic process;GO:0019318//hexose metabolic process
MSTRG.11199.1	Sfur002233	-0.959077151	0.002477753	HK1	Hexokinase	Metabolism;Metabolism;Human Diseases;Organismal Systems;Metabolism;Environmental Information Processing;Metabolism;Human Diseases;Metabolism;Metabolism;Human Diseases;Metabolism;Organismal Systems;Metabolism	Global and overview maps;Global and overview maps;Infectious diseases;Endocrine system;Carbohydrate metabolism;Signal transduction;Carbohydrate metabolism;Cancers;Carbohydrate metabolism;Carbohydrate metabolism;Endocrine and metabolic diseases;Carbohydrate metabolism;Digestive system;Biosynthesis of other secondary metabolites	ko01100//Metabolic pathways;ko01200//Carbon metabolism;ko05131//Shigellosis;ko04910//Insulin signaling pathway;ko00520//Amino sugar and nucleotide sugar metabolism;ko04066//HIF-1 signaling pathway;ko00010//Glycolysis / Gluconeogenesis;ko05230//Central carbon metabolism in cancer;ko00500//Starch and sucrose metabolism;ko00052//Galactose metabolism;ko04930//Type II diabetes mellitus;ko00051//Fructo…	K00844;K00844;K00844;K00844;K00844;K00844;K00844;K00844;K00844;K00844;K00844;K00844;K00844;K00844	-	GO:0004396//hexokinase activity;GO:0005524//ATP binding;GO:0005536//glucose binding	GO:0001678//cellular glucose homeostasis;GO:0006096//glycolytic process;GO:0019318//hexose metabolic process
MSTRG.28277.1	Sfur002233	0.970629003	0.001281315	HK1	Hexokinase	Metabolism;Metabolism;Human Diseases;Organismal Systems;Metabolism;Environmental Information Processing;Metabolism;Human Diseases;Metabolism;Metabolism;Human Diseases;Metabolism;Organismal Systems;Metabolism	Global and overview maps;Global and overview maps;Infectious diseases;Endocrine system;Carbohydrate metabolism;Signal transduction;Carbohydrate metabolism;Cancers;Carbohydrate metabolism;Carbohydrate metabolism;Endocrine and metabolic diseases;Carbohydrate metabolism;Digestive system;Biosynthesis of other secondary metabolites	ko01100//Metabolic pathways;ko01200//Carbon metabolism;ko05131//Shigellosis;ko04910//Insulin signaling pathway;ko00520//Amino sugar and nucleotide sugar metabolism;ko04066//HIF-1 signaling pathway;ko00010//Glycolysis / Gluconeogenesis;ko05230//Central carbon metabolism in cancer;ko00500//Starch and sucrose metabolism;ko00052//Galactose metabolism;ko04930//Type II diabetes mellitus;ko00051//Fructo…	K00844;K00844;K00844;K00844;K00844;K00844;K00844;K00844;K00844;K00844;K00844;K00844;K00844;K00844	-	GO:0004396//hexokinase activity;GO:0005524//ATP binding;GO:0005536//glucose binding	GO:0001678//cellular glucose homeostasis;GO:0006096//glycolytic process;GO:0019318//hexose metabolic process
MSTRG.2447.1	Sfur002233	-0.958372213	0.002563241	HK1	Hexokinase	Metabolism;Metabolism;Human Diseases;Organismal Systems;Metabolism;Environmental Information Processing;Metabolism;Human Diseases;Metabolism;Metabolism;Human Diseases;Metabolism;Organismal Systems;Metabolism	Global and overview maps;Global and overview maps;Infectious diseases;Endocrine system;Carbohydrate metabolism;Signal transduction;Carbohydrate metabolism;Cancers;Carbohydrate metabolism;Carbohydrate metabolism;Endocrine and metabolic diseases;Carbohydrate metabolism;Digestive system;Biosynthesis of other secondary metabolites	ko01100//Metabolic pathways;ko01200//Carbon metabolism;ko05131//Shigellosis;ko04910//Insulin signaling pathway;ko00520//Amino sugar and nucleotide sugar metabolism;ko04066//HIF-1 signaling pathway;ko00010//Glycolysis / Gluconeogenesis;ko05230//Central carbon metabolism in cancer;ko00500//Starch and sucrose metabolism;ko00052//Galactose metabolism;ko04930//Type II diabetes mellitus;ko00051//Fructo…	K00844;K00844;K00844;K00844;K00844;K00844;K00844;K00844;K00844;K00844;K00844;K00844;K00844;K00844	-	GO:0004396//hexokinase activity;GO:0005524//ATP binding;GO:0005536//glucose binding	GO:0001678//cellular glucose homeostasis;GO:0006096//glycolytic process;GO:0019318//hexose metabolic process
MSTRG.34474.2	Sfur002233	-0.958116372	0.00259462	HK1	Hexokinase	Metabolism;Metabolism;Human Diseases;Organismal Systems;Metabolism;Environmental Information Processing;Metabolism;Human Diseases;Metabolism;Metabolism;Human Diseases;Metabolism;Organismal Systems;Metabolism	Global and overview maps;Global and overview maps;Infectious diseases;Endocrine system;Carbohydrate metabolism;Signal transduction;Carbohydrate metabolism;Cancers;Carbohydrate metabolism;Carbohydrate metabolism;Endocrine and metabolic diseases;Carbohydrate metabolism;Digestive system;Biosynthesis of other secondary metabolites	ko01100//Metabolic pathways;ko01200//Carbon metabolism;ko05131//Shigellosis;ko04910//Insulin signaling pathway;ko00520//Amino sugar and nucleotide sugar metabolism;ko04066//HIF-1 signaling pathway;ko00010//Glycolysis / Gluconeogenesis;ko05230//Central carbon metabolism in cancer;ko00500//Starch and sucrose metabolism;ko00052//Galactose metabolism;ko04930//Type II diabetes mellitus;ko00051//Fructo…	K00844;K00844;K00844;K00844;K00844;K00844;K00844;K00844;K00844;K00844;K00844;K00844;K00844;K00844	-	GO:0004396//hexokinase activity;GO:0005524//ATP binding;GO:0005536//glucose binding	GO:0001678//cellular glucose homeostasis;GO:0006096//glycolytic process;GO:0019318//hexose metabolic process
MSTRG.10562.1	Sfur002233	-0.955819199	0.002884796	HK1	Hexokinase	Metabolism;Metabolism;Human Diseases;Organismal Systems;Metabolism;Environmental Information Processing;Metabolism;Human Diseases;Metabolism;Metabolism;Human Diseases;Metabolism;Organismal Systems;Metabolism	Global and overview maps;Global and overview maps;Infectious diseases;Endocrine system;Carbohydrate metabolism;Signal transduction;Carbohydrate metabolism;Cancers;Carbohydrate metabolism;Carbohydrate metabolism;Endocrine and metabolic diseases;Carbohydrate metabolism;Digestive system;Biosynthesis of other secondary metabolites	ko01100//Metabolic pathways;ko01200//Carbon metabolism;ko05131//Shigellosis;ko04910//Insulin signaling pathway;ko00520//Amino sugar and nucleotide sugar metabolism;ko04066//HIF-1 signaling pathway;ko00010//Glycolysis / Gluconeogenesis;ko05230//Central carbon metabolism in cancer;ko00500//Starch and sucrose metabolism;ko00052//Galactose metabolism;ko04930//Type II diabetes mellitus;ko00051//Fructo…	K00844;K00844;K00844;K00844;K00844;K00844;K00844;K00844;K00844;K00844;K00844;K00844;K00844;K00844	-	GO:0004396//hexokinase activity;GO:0005524//ATP binding;GO:0005536//glucose binding	GO:0001678//cellular glucose homeostasis;GO:0006096//glycolytic process;GO:0019318//hexose metabolic process
MSTRG.20058.1	Sfur002233	-0.957668973	0.002649947	HK1	Hexokinase	Metabolism;Metabolism;Human Diseases;Organismal Systems;Metabolism;Environmental Information Processing;Metabolism;Human Diseases;Metabolism;Metabolism;Human Diseases;Metabolism;Organismal Systems;Metabolism	Global and overview maps;Global and overview maps;Infectious diseases;Endocrine system;Carbohydrate metabolism;Signal transduction;Carbohydrate metabolism;Cancers;Carbohydrate metabolism;Carbohydrate metabolism;Endocrine and metabolic diseases;Carbohydrate metabolism;Digestive system;Biosynthesis of other secondary metabolites	ko01100//Metabolic pathways;ko01200//Carbon metabolism;ko05131//Shigellosis;ko04910//Insulin signaling pathway;ko00520//Amino sugar and nucleotide sugar metabolism;ko04066//HIF-1 signaling pathway;ko00010//Glycolysis / Gluconeogenesis;ko05230//Central carbon metabolism in cancer;ko00500//Starch and sucrose metabolism;ko00052//Galactose metabolism;ko04930//Type II diabetes mellitus;ko00051//Fructo…	K00844;K00844;K00844;K00844;K00844;K00844;K00844;K00844;K00844;K00844;K00844;K00844;K00844;K00844	-	GO:0004396//hexokinase activity;GO:0005524//ATP binding;GO:0005536//glucose binding	GO:0001678//cellular glucose homeostasis;GO:0006096//glycolytic process;GO:0019318//hexose metabolic process
MSTRG.38291.5	Sfur002233	-0.960938074	0.00225895	HK1	Hexokinase	Metabolism;Metabolism;Human Diseases;Organismal Systems;Metabolism;Environmental Information Processing;Metabolism;Human Diseases;Metabolism;Metabolism;Human Diseases;Metabolism;Organismal Systems;Metabolism	Global and overview maps;Global and overview maps;Infectious diseases;Endocrine system;Carbohydrate metabolism;Signal transduction;Carbohydrate metabolism;Cancers;Carbohydrate metabolism;Carbohydrate metabolism;Endocrine and metabolic diseases;Carbohydrate metabolism;Digestive system;Biosynthesis of other secondary metabolites	ko01100//Metabolic pathways;ko01200//Carbon metabolism;ko05131//Shigellosis;ko04910//Insulin signaling pathway;ko00520//Amino sugar and nucleotide sugar metabolism;ko04066//HIF-1 signaling pathway;ko00010//Glycolysis / Gluconeogenesis;ko05230//Central carbon metabolism in cancer;ko00500//Starch and sucrose metabolism;ko00052//Galactose metabolism;ko04930//Type II diabetes mellitus;ko00051//Fructo…	K00844;K00844;K00844;K00844;K00844;K00844;K00844;K00844;K00844;K00844;K00844;K00844;K00844;K00844	-	GO:0004396//hexokinase activity;GO:0005524//ATP binding;GO:0005536//glucose binding	GO:0001678//cellular glucose homeostasis;GO:0006096//glycolytic process;GO:0019318//hexose metabolic process
MSTRG.5687.1	Sfur002233	0.967793551	0.00153918	HK1	Hexokinase	Metabolism;Metabolism;Human Diseases;Organismal Systems;Metabolism;Environmental Information Processing;Metabolism;Human Diseases;Metabolism;Metabolism;Human Diseases;Metabolism;Organismal Systems;Metabolism	Global and overview maps;Global and overview maps;Infectious diseases;Endocrine system;Carbohydrate metabolism;Signal transduction;Carbohydrate metabolism;Cancers;Carbohydrate metabolism;Carbohydrate metabolism;Endocrine and metabolic diseases;Carbohydrate metabolism;Digestive system;Biosynthesis of other secondary metabolites	ko01100//Metabolic pathways;ko01200//Carbon metabolism;ko05131//Shigellosis;ko04910//Insulin signaling pathway;ko00520//Amino sugar and nucleotide sugar metabolism;ko04066//HIF-1 signaling pathway;ko00010//Glycolysis / Gluconeogenesis;ko05230//Central carbon metabolism in cancer;ko00500//Starch and sucrose metabolism;ko00052//Galactose metabolism;ko04930//Type II diabetes mellitus;ko00051//Fructo…	K00844;K00844;K00844;K00844;K00844;K00844;K00844;K00844;K00844;K00844;K00844;K00844;K00844;K00844	-	GO:0004396//hexokinase activity;GO:0005524//ATP binding;GO:0005536//glucose binding	GO:0001678//cellular glucose homeostasis;GO:0006096//glycolytic process;GO:0019318//hexose metabolic process
MSTRG.29606.1	Sfur002233	0.999746641	9.63E-08	HK1	Hexokinase	Metabolism;Metabolism;Human Diseases;Organismal Systems;Metabolism;Environmental Information Processing;Metabolism;Human Diseases;Metabolism;Metabolism;Human Diseases;Metabolism;Organismal Systems;Metabolism	Global and overview maps;Global and overview maps;Infectious diseases;Endocrine system;Carbohydrate metabolism;Signal transduction;Carbohydrate metabolism;Cancers;Carbohydrate metabolism;Carbohydrate metabolism;Endocrine and metabolic diseases;Carbohydrate metabolism;Digestive system;Biosynthesis of other secondary metabolites	ko01100//Metabolic pathways;ko01200//Carbon metabolism;ko05131//Shigellosis;ko04910//Insulin signaling pathway;ko00520//Amino sugar and nucleotide sugar metabolism;ko04066//HIF-1 signaling pathway;ko00010//Glycolysis / Gluconeogenesis;ko05230//Central carbon metabolism in cancer;ko00500//Starch and sucrose metabolism;ko00052//Galactose metabolism;ko04930//Type II diabetes mellitus;ko00051//Fructo…	K00844;K00844;K00844;K00844;K00844;K00844;K00844;K00844;K00844;K00844;K00844;K00844;K00844;K00844	-	GO:0004396//hexokinase activity;GO:0005524//ATP binding;GO:0005536//glucose binding	GO:0001678//cellular glucose homeostasis;GO:0006096//glycolytic process;GO:0019318//hexose metabolic process
MSTRG.30685.1	Sfur002233	0.967231275	0.001593091	HK1	Hexokinase	Metabolism;Metabolism;Human Diseases;Organismal Systems;Metabolism;Environmental Information Processing;Metabolism;Human Diseases;Metabolism;Metabolism;Human Diseases;Metabolism;Organismal Systems;Metabolism	Global and overview maps;Global and overview maps;Infectious diseases;Endocrine system;Carbohydrate metabolism;Signal transduction;Carbohydrate metabolism;Cancers;Carbohydrate metabolism;Carbohydrate metabolism;Endocrine and metabolic diseases;Carbohydrate metabolism;Digestive system;Biosynthesis of other secondary metabolites	ko01100//Metabolic pathways;ko01200//Carbon metabolism;ko05131//Shigellosis;ko04910//Insulin signaling pathway;ko00520//Amino sugar and nucleotide sugar metabolism;ko04066//HIF-1 signaling pathway;ko00010//Glycolysis / Gluconeogenesis;ko05230//Central carbon metabolism in cancer;ko00500//Starch and sucrose metabolism;ko00052//Galactose metabolism;ko04930//Type II diabetes mellitus;ko00051//Fructo…	K00844;K00844;K00844;K00844;K00844;K00844;K00844;K00844;K00844;K00844;K00844;K00844;K00844;K00844	-	GO:0004396//hexokinase activity;GO:0005524//ATP binding;GO:0005536//glucose binding	GO:0001678//cellular glucose homeostasis;GO:0006096//glycolytic process;GO:0019318//hexose metabolic process
MSTRG.9698.2	Sfur002233	0.987451168	0.000235222	HK1	Hexokinase	Metabolism;Metabolism;Human Diseases;Organismal Systems;Metabolism;Environmental Information Processing;Metabolism;Human Diseases;Metabolism;Metabolism;Human Diseases;Metabolism;Organismal Systems;Metabolism	Global and overview maps;Global and overview maps;Infectious diseases;Endocrine system;Carbohydrate metabolism;Signal transduction;Carbohydrate metabolism;Cancers;Carbohydrate metabolism;Carbohydrate metabolism;Endocrine and metabolic diseases;Carbohydrate metabolism;Digestive system;Biosynthesis of other secondary metabolites	ko01100//Metabolic pathways;ko01200//Carbon metabolism;ko05131//Shigellosis;ko04910//Insulin signaling pathway;ko00520//Amino sugar and nucleotide sugar metabolism;ko04066//HIF-1 signaling pathway;ko00010//Glycolysis / Gluconeogenesis;ko05230//Central carbon metabolism in cancer;ko00500//Starch and sucrose metabolism;ko00052//Galactose metabolism;ko04930//Type II diabetes mellitus;ko00051//Fructo…	K00844;K00844;K00844;K00844;K00844;K00844;K00844;K00844;K00844;K00844;K00844;K00844;K00844;K00844	-	GO:0004396//hexokinase activity;GO:0005524//ATP binding;GO:0005536//glucose binding	GO:0001678//cellular glucose homeostasis;GO:0006096//glycolytic process;GO:0019318//hexose metabolic process
MSTRG.1725.5	Sfur002233	0.97199268	0.00116563	HK1	Hexokinase	Metabolism;Metabolism;Human Diseases;Organismal Systems;Metabolism;Environmental Information Processing;Metabolism;Human Diseases;Metabolism;Metabolism;Human Diseases;Metabolism;Organismal Systems;Metabolism	Global and overview maps;Global and overview maps;Infectious diseases;Endocrine system;Carbohydrate metabolism;Signal transduction;Carbohydrate metabolism;Cancers;Carbohydrate metabolism;Carbohydrate metabolism;Endocrine and metabolic diseases;Carbohydrate metabolism;Digestive system;Biosynthesis of other secondary metabolites	ko01100//Metabolic pathways;ko01200//Carbon metabolism;ko05131//Shigellosis;ko04910//Insulin signaling pathway;ko00520//Amino sugar and nucleotide sugar metabolism;ko04066//HIF-1 signaling pathway;ko00010//Glycolysis / Gluconeogenesis;ko05230//Central carbon metabolism in cancer;ko00500//Starch and sucrose metabolism;ko00052//Galactose metabolism;ko04930//Type II diabetes mellitus;ko00051//Fructo…	K00844;K00844;K00844;K00844;K00844;K00844;K00844;K00844;K00844;K00844;K00844;K00844;K00844;K00844	-	GO:0004396//hexokinase activity;GO:0005524//ATP binding;GO:0005536//glucose binding	GO:0001678//cellular glucose homeostasis;GO:0006096//glycolytic process;GO:0019318//hexose metabolic process
MSTRG.11198.1	Sfur002233	0.963011882	0.002026879	HK1	Hexokinase	Metabolism;Metabolism;Human Diseases;Organismal Systems;Metabolism;Environmental Information Processing;Metabolism;Human Diseases;Metabolism;Metabolism;Human Diseases;Metabolism;Organismal Systems;Metabolism	Global and overview maps;Global and overview maps;Infectious diseases;Endocrine system;Carbohydrate metabolism;Signal transduction;Carbohydrate metabolism;Cancers;Carbohydrate metabolism;Carbohydrate metabolism;Endocrine and metabolic diseases;Carbohydrate metabolism;Digestive system;Biosynthesis of other secondary metabolites	ko01100//Metabolic pathways;ko01200//Carbon metabolism;ko05131//Shigellosis;ko04910//Insulin signaling pathway;ko00520//Amino sugar and nucleotide sugar metabolism;ko04066//HIF-1 signaling pathway;ko00010//Glycolysis / Gluconeogenesis;ko05230//Central carbon metabolism in cancer;ko00500//Starch and sucrose metabolism;ko00052//Galactose metabolism;ko04930//Type II diabetes mellitus;ko00051//Fructo…	K00844;K00844;K00844;K00844;K00844;K00844;K00844;K00844;K00844;K00844;K00844;K00844;K00844;K00844	-	GO:0004396//hexokinase activity;GO:0005524//ATP binding;GO:0005536//glucose binding	GO:0001678//cellular glucose homeostasis;GO:0006096//glycolytic process;GO:0019318//hexose metabolic process
MSTRG.36087.1	Sfur002233	-0.952147006	0.003380074	HK1	Hexokinase	Metabolism;Metabolism;Human Diseases;Organismal Systems;Metabolism;Environmental Information Processing;Metabolism;Human Diseases;Metabolism;Metabolism;Human Diseases;Metabolism;Organismal Systems;Metabolism	Global and overview maps;Global and overview maps;Infectious diseases;Endocrine system;Carbohydrate metabolism;Signal transduction;Carbohydrate metabolism;Cancers;Carbohydrate metabolism;Carbohydrate metabolism;Endocrine and metabolic diseases;Carbohydrate metabolism;Digestive system;Biosynthesis of other secondary metabolites	ko01100//Metabolic pathways;ko01200//Carbon metabolism;ko05131//Shigellosis;ko04910//Insulin signaling pathway;ko00520//Amino sugar and nucleotide sugar metabolism;ko04066//HIF-1 signaling pathway;ko00010//Glycolysis / Gluconeogenesis;ko05230//Central carbon metabolism in cancer;ko00500//Starch and sucrose metabolism;ko00052//Galactose metabolism;ko04930//Type II diabetes mellitus;ko00051//Fructo…	K00844;K00844;K00844;K00844;K00844;K00844;K00844;K00844;K00844;K00844;K00844;K00844;K00844;K00844	-	GO:0004396//hexokinase activity;GO:0005524//ATP binding;GO:0005536//glucose binding	GO:0001678//cellular glucose homeostasis;GO:0006096//glycolytic process;GO:0019318//hexose metabolic process
MSTRG.19842.1	Sfur002233	0.959713828	0.002401772	HK1	Hexokinase	Metabolism;Metabolism;Human Diseases;Organismal Systems;Metabolism;Environmental Information Processing;Metabolism;Human Diseases;Metabolism;Metabolism;Human Diseases;Metabolism;Organismal Systems;Metabolism	Global and overview maps;Global and overview maps;Infectious diseases;Endocrine system;Carbohydrate metabolism;Signal transduction;Carbohydrate metabolism;Cancers;Carbohydrate metabolism;Carbohydrate metabolism;Endocrine and metabolic diseases;Carbohydrate metabolism;Digestive system;Biosynthesis of other secondary metabolites	ko01100//Metabolic pathways;ko01200//Carbon metabolism;ko05131//Shigellosis;ko04910//Insulin signaling pathway;ko00520//Amino sugar and nucleotide sugar metabolism;ko04066//HIF-1 signaling pathway;ko00010//Glycolysis / Gluconeogenesis;ko05230//Central carbon metabolism in cancer;ko00500//Starch and sucrose metabolism;ko00052//Galactose metabolism;ko04930//Type II diabetes mellitus;ko00051//Fructo…	K00844;K00844;K00844;K00844;K00844;K00844;K00844;K00844;K00844;K00844;K00844;K00844;K00844;K00844	-	GO:0004396//hexokinase activity;GO:0005524//ATP binding;GO:0005536//glucose binding	GO:0001678//cellular glucose homeostasis;GO:0006096//glycolytic process;GO:0019318//hexose metabolic process
MSTRG.7810.1	Sfur002233	0.968894593	0.001436272	HK1	Hexokinase	Metabolism;Metabolism;Human Diseases;Organismal Systems;Metabolism;Environmental Information Processing;Metabolism;Human Diseases;Metabolism;Metabolism;Human Diseases;Metabolism;Organismal Systems;Metabolism	Global and overview maps;Global and overview maps;Infectious diseases;Endocrine system;Carbohydrate metabolism;Signal transduction;Carbohydrate metabolism;Cancers;Carbohydrate metabolism;Carbohydrate metabolism;Endocrine and metabolic diseases;Carbohydrate metabolism;Digestive system;Biosynthesis of other secondary metabolites	ko01100//Metabolic pathways;ko01200//Carbon metabolism;ko05131//Shigellosis;ko04910//Insulin signaling pathway;ko00520//Amino sugar and nucleotide sugar metabolism;ko04066//HIF-1 signaling pathway;ko00010//Glycolysis / Gluconeogenesis;ko05230//Central carbon metabolism in cancer;ko00500//Starch and sucrose metabolism;ko00052//Galactose metabolism;ko04930//Type II diabetes mellitus;ko00051//Fructo…	K00844;K00844;K00844;K00844;K00844;K00844;K00844;K00844;K00844;K00844;K00844;K00844;K00844;K00844	-	GO:0004396//hexokinase activity;GO:0005524//ATP binding;GO:0005536//glucose binding	GO:0001678//cellular glucose homeostasis;GO:0006096//glycolytic process;GO:0019318//hexose metabolic process
MSTRG.8569.4	Sfur002233	-0.958346214	0.002566421	HK1	Hexokinase	Metabolism;Metabolism;Human Diseases;Organismal Systems;Metabolism;Environmental Information Processing;Metabolism;Human Diseases;Metabolism;Metabolism;Human Diseases;Metabolism;Organismal Systems;Metabolism	Global and overview maps;Global and overview maps;Infectious diseases;Endocrine system;Carbohydrate metabolism;Signal transduction;Carbohydrate metabolism;Cancers;Carbohydrate metabolism;Carbohydrate metabolism;Endocrine and metabolic diseases;Carbohydrate metabolism;Digestive system;Biosynthesis of other secondary metabolites	ko01100//Metabolic pathways;ko01200//Carbon metabolism;ko05131//Shigellosis;ko04910//Insulin signaling pathway;ko00520//Amino sugar and nucleotide sugar metabolism;ko04066//HIF-1 signaling pathway;ko00010//Glycolysis / Gluconeogenesis;ko05230//Central carbon metabolism in cancer;ko00500//Starch and sucrose metabolism;ko00052//Galactose metabolism;ko04930//Type II diabetes mellitus;ko00051//Fructo…	K00844;K00844;K00844;K00844;K00844;K00844;K00844;K00844;K00844;K00844;K00844;K00844;K00844;K00844	-	GO:0004396//hexokinase activity;GO:0005524//ATP binding;GO:0005536//glucose binding	GO:0001678//cellular glucose homeostasis;GO:0006096//glycolytic process;GO:0019318//hexose metabolic process
MSTRG.12406.1	Sfur002233	0.969476179	0.001383336	HK1	Hexokinase	Metabolism;Metabolism;Human Diseases;Organismal Systems;Metabolism;Environmental Information Processing;Metabolism;Human Diseases;Metabolism;Metabolism;Human Diseases;Metabolism;Organismal Systems;Metabolism	Global and overview maps;Global and overview maps;Infectious diseases;Endocrine system;Carbohydrate metabolism;Signal transduction;Carbohydrate metabolism;Cancers;Carbohydrate metabolism;Carbohydrate metabolism;Endocrine and metabolic diseases;Carbohydrate metabolism;Digestive system;Biosynthesis of other secondary metabolites	ko01100//Metabolic pathways;ko01200//Carbon metabolism;ko05131//Shigellosis;ko04910//Insulin signaling pathway;ko00520//Amino sugar and nucleotide sugar metabolism;ko04066//HIF-1 signaling pathway;ko00010//Glycolysis / Gluconeogenesis;ko05230//Central carbon metabolism in cancer;ko00500//Starch and sucrose metabolism;ko00052//Galactose metabolism;ko04930//Type II diabetes mellitus;ko00051//Fructo…	K00844;K00844;K00844;K00844;K00844;K00844;K00844;K00844;K00844;K00844;K00844;K00844;K00844;K00844	-	GO:0004396//hexokinase activity;GO:0005524//ATP binding;GO:0005536//glucose binding	GO:0001678//cellular glucose homeostasis;GO:0006096//glycolytic process;GO:0019318//hexose metabolic process
MSTRG.24265.1	Sfur002233	0.962544189	0.002078133	HK1	Hexokinase	Metabolism;Metabolism;Human Diseases;Organismal Systems;Metabolism;Environmental Information Processing;Metabolism;Human Diseases;Metabolism;Metabolism;Human Diseases;Metabolism;Organismal Systems;Metabolism	Global and overview maps;Global and overview maps;Infectious diseases;Endocrine system;Carbohydrate metabolism;Signal transduction;Carbohydrate metabolism;Cancers;Carbohydrate metabolism;Carbohydrate metabolism;Endocrine and metabolic diseases;Carbohydrate metabolism;Digestive system;Biosynthesis of other secondary metabolites	ko01100//Metabolic pathways;ko01200//Carbon metabolism;ko05131//Shigellosis;ko04910//Insulin signaling pathway;ko00520//Amino sugar and nucleotide sugar metabolism;ko04066//HIF-1 signaling pathway;ko00010//Glycolysis / Gluconeogenesis;ko05230//Central carbon metabolism in cancer;ko00500//Starch and sucrose metabolism;ko00052//Galactose metabolism;ko04930//Type II diabetes mellitus;ko00051//Fructo…	K00844;K00844;K00844;K00844;K00844;K00844;K00844;K00844;K00844;K00844;K00844;K00844;K00844;K00844	-	GO:0004396//hexokinase activity;GO:0005524//ATP binding;GO:0005536//glucose binding	GO:0001678//cellular glucose homeostasis;GO:0006096//glycolytic process;GO:0019318//hexose metabolic process
MSTRG.31005.1	Sfur002233	-0.963421384	0.001982522	HK1	Hexokinase	Metabolism;Metabolism;Human Diseases;Organismal Systems;Metabolism;Environmental Information Processing;Metabolism;Human Diseases;Metabolism;Metabolism;Human Diseases;Metabolism;Organismal Systems;Metabolism	Global and overview maps;Global and overview maps;Infectious diseases;Endocrine system;Carbohydrate metabolism;Signal transduction;Carbohydrate metabolism;Cancers;Carbohydrate metabolism;Carbohydrate metabolism;Endocrine and metabolic diseases;Carbohydrate metabolism;Digestive system;Biosynthesis of other secondary metabolites	ko01100//Metabolic pathways;ko01200//Carbon metabolism;ko05131//Shigellosis;ko04910//Insulin signaling pathway;ko00520//Amino sugar and nucleotide sugar metabolism;ko04066//HIF-1 signaling pathway;ko00010//Glycolysis / Gluconeogenesis;ko05230//Central carbon metabolism in cancer;ko00500//Starch and sucrose metabolism;ko00052//Galactose metabolism;ko04930//Type II diabetes mellitus;ko00051//Fructo…	K00844;K00844;K00844;K00844;K00844;K00844;K00844;K00844;K00844;K00844;K00844;K00844;K00844;K00844	-	GO:0004396//hexokinase activity;GO:0005524//ATP binding;GO:0005536//glucose binding	GO:0001678//cellular glucose homeostasis;GO:0006096//glycolytic process;GO:0019318//hexose metabolic process
MSTRG.23863.1	Sfur002233	-0.979611455	0.000619301	HK1	Hexokinase	Metabolism;Metabolism;Human Diseases;Organismal Systems;Metabolism;Environmental Information Processing;Metabolism;Human Diseases;Metabolism;Metabolism;Human Diseases;Metabolism;Organismal Systems;Metabolism	Global and overview maps;Global and overview maps;Infectious diseases;Endocrine system;Carbohydrate metabolism;Signal transduction;Carbohydrate metabolism;Cancers;Carbohydrate metabolism;Carbohydrate metabolism;Endocrine and metabolic diseases;Carbohydrate metabolism;Digestive system;Biosynthesis of other secondary metabolites	ko01100//Metabolic pathways;ko01200//Carbon metabolism;ko05131//Shigellosis;ko04910//Insulin signaling pathway;ko00520//Amino sugar and nucleotide sugar metabolism;ko04066//HIF-1 signaling pathway;ko00010//Glycolysis / Gluconeogenesis;ko05230//Central carbon metabolism in cancer;ko00500//Starch and sucrose metabolism;ko00052//Galactose metabolism;ko04930//Type II diabetes mellitus;ko00051//Fructo…	K00844;K00844;K00844;K00844;K00844;K00844;K00844;K00844;K00844;K00844;K00844;K00844;K00844;K00844	-	GO:0004396//hexokinase activity;GO:0005524//ATP binding;GO:0005536//glucose binding	GO:0001678//cellular glucose homeostasis;GO:0006096//glycolytic process;GO:0019318//hexose metabolic process
MSTRG.18635.5	Sfur002233	-0.964091743	0.001910954	HK1	Hexokinase	Metabolism;Metabolism;Human Diseases;Organismal Systems;Metabolism;Environmental Information Processing;Metabolism;Human Diseases;Metabolism;Metabolism;Human Diseases;Metabolism;Organismal Systems;Metabolism	Global and overview maps;Global and overview maps;Infectious diseases;Endocrine system;Carbohydrate metabolism;Signal transduction;Carbohydrate metabolism;Cancers;Carbohydrate metabolism;Carbohydrate metabolism;Endocrine and metabolic diseases;Carbohydrate metabolism;Digestive system;Biosynthesis of other secondary metabolites	ko01100//Metabolic pathways;ko01200//Carbon metabolism;ko05131//Shigellosis;ko04910//Insulin signaling pathway;ko00520//Amino sugar and nucleotide sugar metabolism;ko04066//HIF-1 signaling pathway;ko00010//Glycolysis / Gluconeogenesis;ko05230//Central carbon metabolism in cancer;ko00500//Starch and sucrose metabolism;ko00052//Galactose metabolism;ko04930//Type II diabetes mellitus;ko00051//Fructo…	K00844;K00844;K00844;K00844;K00844;K00844;K00844;K00844;K00844;K00844;K00844;K00844;K00844;K00844	-	GO:0004396//hexokinase activity;GO:0005524//ATP binding;GO:0005536//glucose binding	GO:0001678//cellular glucose homeostasis;GO:0006096//glycolytic process;GO:0019318//hexose metabolic process
MSTRG.32758.2	Sfur002233	0.965733273	0.001741195	HK1	Hexokinase	Metabolism;Metabolism;Human Diseases;Organismal Systems;Metabolism;Environmental Information Processing;Metabolism;Human Diseases;Metabolism;Metabolism;Human Diseases;Metabolism;Organismal Systems;Metabolism	Global and overview maps;Global and overview maps;Infectious diseases;Endocrine system;Carbohydrate metabolism;Signal transduction;Carbohydrate metabolism;Cancers;Carbohydrate metabolism;Carbohydrate metabolism;Endocrine and metabolic diseases;Carbohydrate metabolism;Digestive system;Biosynthesis of other secondary metabolites	ko01100//Metabolic pathways;ko01200//Carbon metabolism;ko05131//Shigellosis;ko04910//Insulin signaling pathway;ko00520//Amino sugar and nucleotide sugar metabolism;ko04066//HIF-1 signaling pathway;ko00010//Glycolysis / Gluconeogenesis;ko05230//Central carbon metabolism in cancer;ko00500//Starch and sucrose metabolism;ko00052//Galactose metabolism;ko04930//Type II diabetes mellitus;ko00051//Fructo…	K00844;K00844;K00844;K00844;K00844;K00844;K00844;K00844;K00844;K00844;K00844;K00844;K00844;K00844	-	GO:0004396//hexokinase activity;GO:0005524//ATP binding;GO:0005536//glucose binding	GO:0001678//cellular glucose homeostasis;GO:0006096//glycolytic process;GO:0019318//hexose metabolic process
MSTRG.370.1	Sfur002233	0.966634575	0.001651305	HK1	Hexokinase	Metabolism;Metabolism;Human Diseases;Organismal Systems;Metabolism;Environmental Information Processing;Metabolism;Human Diseases;Metabolism;Metabolism;Human Diseases;Metabolism;Organismal Systems;Metabolism	Global and overview maps;Global and overview maps;Infectious diseases;Endocrine system;Carbohydrate metabolism;Signal transduction;Carbohydrate metabolism;Cancers;Carbohydrate metabolism;Carbohydrate metabolism;Endocrine and metabolic diseases;Carbohydrate metabolism;Digestive system;Biosynthesis of other secondary metabolites	ko01100//Metabolic pathways;ko01200//Carbon metabolism;ko05131//Shigellosis;ko04910//Insulin signaling pathway;ko00520//Amino sugar and nucleotide sugar metabolism;ko04066//HIF-1 signaling pathway;ko00010//Glycolysis / Gluconeogenesis;ko05230//Central carbon metabolism in cancer;ko00500//Starch and sucrose metabolism;ko00052//Galactose metabolism;ko04930//Type II diabetes mellitus;ko00051//Fructo…	K00844;K00844;K00844;K00844;K00844;K00844;K00844;K00844;K00844;K00844;K00844;K00844;K00844;K00844	-	GO:0004396//hexokinase activity;GO:0005524//ATP binding;GO:0005536//glucose binding	GO:0001678//cellular glucose homeostasis;GO:0006096//glycolytic process;GO:0019318//hexose metabolic process
MSTRG.19231.1	Sfur002233	0.957002443	0.002733438	HK1	Hexokinase	Metabolism;Metabolism;Human Diseases;Organismal Systems;Metabolism;Environmental Information Processing;Metabolism;Human Diseases;Metabolism;Metabolism;Human Diseases;Metabolism;Organismal Systems;Metabolism	Global and overview maps;Global and overview maps;Infectious diseases;Endocrine system;Carbohydrate metabolism;Signal transduction;Carbohydrate metabolism;Cancers;Carbohydrate metabolism;Carbohydrate metabolism;Endocrine and metabolic diseases;Carbohydrate metabolism;Digestive system;Biosynthesis of other secondary metabolites	ko01100//Metabolic pathways;ko01200//Carbon metabolism;ko05131//Shigellosis;ko04910//Insulin signaling pathway;ko00520//Amino sugar and nucleotide sugar metabolism;ko04066//HIF-1 signaling pathway;ko00010//Glycolysis / Gluconeogenesis;ko05230//Central carbon metabolism in cancer;ko00500//Starch and sucrose metabolism;ko00052//Galactose metabolism;ko04930//Type II diabetes mellitus;ko00051//Fructo…	K00844;K00844;K00844;K00844;K00844;K00844;K00844;K00844;K00844;K00844;K00844;K00844;K00844;K00844	-	GO:0004396//hexokinase activity;GO:0005524//ATP binding;GO:0005536//glucose binding	GO:0001678//cellular glucose homeostasis;GO:0006096//glycolytic process;GO:0019318//hexose metabolic process
MSTRG.11349.1	Sfur002233	-0.953575321	0.003182848	HK1	Hexokinase	Metabolism;Metabolism;Human Diseases;Organismal Systems;Metabolism;Environmental Information Processing;Metabolism;Human Diseases;Metabolism;Metabolism;Human Diseases;Metabolism;Organismal Systems;Metabolism	Global and overview maps;Global and overview maps;Infectious diseases;Endocrine system;Carbohydrate metabolism;Signal transduction;Carbohydrate metabolism;Cancers;Carbohydrate metabolism;Carbohydrate metabolism;Endocrine and metabolic diseases;Carbohydrate metabolism;Digestive system;Biosynthesis of other secondary metabolites	ko01100//Metabolic pathways;ko01200//Carbon metabolism;ko05131//Shigellosis;ko04910//Insulin signaling pathway;ko00520//Amino sugar and nucleotide sugar metabolism;ko04066//HIF-1 signaling pathway;ko00010//Glycolysis / Gluconeogenesis;ko05230//Central carbon metabolism in cancer;ko00500//Starch and sucrose metabolism;ko00052//Galactose metabolism;ko04930//Type II diabetes mellitus;ko00051//Fructo…	K00844;K00844;K00844;K00844;K00844;K00844;K00844;K00844;K00844;K00844;K00844;K00844;K00844;K00844	-	GO:0004396//hexokinase activity;GO:0005524//ATP binding;GO:0005536//glucose binding	GO:0001678//cellular glucose homeostasis;GO:0006096//glycolytic process;GO:0019318//hexose metabolic process
MSTRG.14637.1	Sfur002233	0.978652442	0.000678713	HK1	Hexokinase	Metabolism;Metabolism;Human Diseases;Organismal Systems;Metabolism;Environmental Information Processing;Metabolism;Human Diseases;Metabolism;Metabolism;Human Diseases;Metabolism;Organismal Systems;Metabolism	Global and overview maps;Global and overview maps;Infectious diseases;Endocrine system;Carbohydrate metabolism;Signal transduction;Carbohydrate metabolism;Cancers;Carbohydrate metabolism;Carbohydrate metabolism;Endocrine and metabolic diseases;Carbohydrate metabolism;Digestive system;Biosynthesis of other secondary metabolites	ko01100//Metabolic pathways;ko01200//Carbon metabolism;ko05131//Shigellosis;ko04910//Insulin signaling pathway;ko00520//Amino sugar and nucleotide sugar metabolism;ko04066//HIF-1 signaling pathway;ko00010//Glycolysis / Gluconeogenesis;ko05230//Central carbon metabolism in cancer;ko00500//Starch and sucrose metabolism;ko00052//Galactose metabolism;ko04930//Type II diabetes mellitus;ko00051//Fructo…	K00844;K00844;K00844;K00844;K00844;K00844;K00844;K00844;K00844;K00844;K00844;K00844;K00844;K00844	-	GO:0004396//hexokinase activity;GO:0005524//ATP binding;GO:0005536//glucose binding	GO:0001678//cellular glucose homeostasis;GO:0006096//glycolytic process;GO:0019318//hexose metabolic process
MSTRG.35256.1	Sfur002233	0.974097645	0.000997709	HK1	Hexokinase	Metabolism;Metabolism;Human Diseases;Organismal Systems;Metabolism;Environmental Information Processing;Metabolism;Human Diseases;Metabolism;Metabolism;Human Diseases;Metabolism;Organismal Systems;Metabolism	Global and overview maps;Global and overview maps;Infectious diseases;Endocrine system;Carbohydrate metabolism;Signal transduction;Carbohydrate metabolism;Cancers;Carbohydrate metabolism;Carbohydrate metabolism;Endocrine and metabolic diseases;Carbohydrate metabolism;Digestive system;Biosynthesis of other secondary metabolites	ko01100//Metabolic pathways;ko01200//Carbon metabolism;ko05131//Shigellosis;ko04910//Insulin signaling pathway;ko00520//Amino sugar and nucleotide sugar metabolism;ko04066//HIF-1 signaling pathway;ko00010//Glycolysis / Gluconeogenesis;ko05230//Central carbon metabolism in cancer;ko00500//Starch and sucrose metabolism;ko00052//Galactose metabolism;ko04930//Type II diabetes mellitus;ko00051//Fructo…	K00844;K00844;K00844;K00844;K00844;K00844;K00844;K00844;K00844;K00844;K00844;K00844;K00844;K00844	-	GO:0004396//hexokinase activity;GO:0005524//ATP binding;GO:0005536//glucose binding	GO:0001678//cellular glucose homeostasis;GO:0006096//glycolytic process;GO:0019318//hexose metabolic process
MSTRG.22966.1	Sfur002233	0.977524446	0.000752049	HK1	Hexokinase	Metabolism;Metabolism;Human Diseases;Organismal Systems;Metabolism;Environmental Information Processing;Metabolism;Human Diseases;Metabolism;Metabolism;Human Diseases;Metabolism;Organismal Systems;Metabolism	Global and overview maps;Global and overview maps;Infectious diseases;Endocrine system;Carbohydrate metabolism;Signal transduction;Carbohydrate metabolism;Cancers;Carbohydrate metabolism;Carbohydrate metabolism;Endocrine and metabolic diseases;Carbohydrate metabolism;Digestive system;Biosynthesis of other secondary metabolites	ko01100//Metabolic pathways;ko01200//Carbon metabolism;ko05131//Shigellosis;ko04910//Insulin signaling pathway;ko00520//Amino sugar and nucleotide sugar metabolism;ko04066//HIF-1 signaling pathway;ko00010//Glycolysis / Gluconeogenesis;ko05230//Central carbon metabolism in cancer;ko00500//Starch and sucrose metabolism;ko00052//Galactose metabolism;ko04930//Type II diabetes mellitus;ko00051//Fructo…	K00844;K00844;K00844;K00844;K00844;K00844;K00844;K00844;K00844;K00844;K00844;K00844;K00844;K00844	-	GO:0004396//hexokinase activity;GO:0005524//ATP binding;GO:0005536//glucose binding	GO:0001678//cellular glucose homeostasis;GO:0006096//glycolytic process;GO:0019318//hexose metabolic process
MSTRG.15726.1	Sfur002233	-0.95731857	0.00269368	HK1	Hexokinase	Metabolism;Metabolism;Human Diseases;Organismal Systems;Metabolism;Environmental Information Processing;Metabolism;Human Diseases;Metabolism;Metabolism;Human Diseases;Metabolism;Organismal Systems;Metabolism	Global and overview maps;Global and overview maps;Infectious diseases;Endocrine system;Carbohydrate metabolism;Signal transduction;Carbohydrate metabolism;Cancers;Carbohydrate metabolism;Carbohydrate metabolism;Endocrine and metabolic diseases;Carbohydrate metabolism;Digestive system;Biosynthesis of other secondary metabolites	ko01100//Metabolic pathways;ko01200//Carbon metabolism;ko05131//Shigellosis;ko04910//Insulin signaling pathway;ko00520//Amino sugar and nucleotide sugar metabolism;ko04066//HIF-1 signaling pathway;ko00010//Glycolysis / Gluconeogenesis;ko05230//Central carbon metabolism in cancer;ko00500//Starch and sucrose metabolism;ko00052//Galactose metabolism;ko04930//Type II diabetes mellitus;ko00051//Fructo…	K00844;K00844;K00844;K00844;K00844;K00844;K00844;K00844;K00844;K00844;K00844;K00844;K00844;K00844	-	GO:0004396//hexokinase activity;GO:0005524//ATP binding;GO:0005536//glucose binding	GO:0001678//cellular glucose homeostasis;GO:0006096//glycolytic process;GO:0019318//hexose metabolic process
MSTRG.2075.2	Sfur002233	0.983956621	0.00038402	HK1	Hexokinase	Metabolism;Metabolism;Human Diseases;Organismal Systems;Metabolism;Environmental Information Processing;Metabolism;Human Diseases;Metabolism;Metabolism;Human Diseases;Metabolism;Organismal Systems;Metabolism	Global and overview maps;Global and overview maps;Infectious diseases;Endocrine system;Carbohydrate metabolism;Signal transduction;Carbohydrate metabolism;Cancers;Carbohydrate metabolism;Carbohydrate metabolism;Endocrine and metabolic diseases;Carbohydrate metabolism;Digestive system;Biosynthesis of other secondary metabolites	ko01100//Metabolic pathways;ko01200//Carbon metabolism;ko05131//Shigellosis;ko04910//Insulin signaling pathway;ko00520//Amino sugar and nucleotide sugar metabolism;ko04066//HIF-1 signaling pathway;ko00010//Glycolysis / Gluconeogenesis;ko05230//Central carbon metabolism in cancer;ko00500//Starch and sucrose metabolism;ko00052//Galactose metabolism;ko04930//Type II diabetes mellitus;ko00051//Fructo…	K00844;K00844;K00844;K00844;K00844;K00844;K00844;K00844;K00844;K00844;K00844;K00844;K00844;K00844	-	GO:0004396//hexokinase activity;GO:0005524//ATP binding;GO:0005536//glucose binding	GO:0001678//cellular glucose homeostasis;GO:0006096//glycolytic process;GO:0019318//hexose metabolic process
MSTRG.17492.2	Sfur002233	0.966532293	0.001661388	HK1	Hexokinase	Metabolism;Metabolism;Human Diseases;Organismal Systems;Metabolism;Environmental Information Processing;Metabolism;Human Diseases;Metabolism;Metabolism;Human Diseases;Metabolism;Organismal Systems;Metabolism	Global and overview maps;Global and overview maps;Infectious diseases;Endocrine system;Carbohydrate metabolism;Signal transduction;Carbohydrate metabolism;Cancers;Carbohydrate metabolism;Carbohydrate metabolism;Endocrine and metabolic diseases;Carbohydrate metabolism;Digestive system;Biosynthesis of other secondary metabolites	ko01100//Metabolic pathways;ko01200//Carbon metabolism;ko05131//Shigellosis;ko04910//Insulin signaling pathway;ko00520//Amino sugar and nucleotide sugar metabolism;ko04066//HIF-1 signaling pathway;ko00010//Glycolysis / Gluconeogenesis;ko05230//Central carbon metabolism in cancer;ko00500//Starch and sucrose metabolism;ko00052//Galactose metabolism;ko04930//Type II diabetes mellitus;ko00051//Fructo…	K00844;K00844;K00844;K00844;K00844;K00844;K00844;K00844;K00844;K00844;K00844;K00844;K00844;K00844	-	GO:0004396//hexokinase activity;GO:0005524//ATP binding;GO:0005536//glucose binding	GO:0001678//cellular glucose homeostasis;GO:0006096//glycolytic process;GO:0019318//hexose metabolic process
MSTRG.12405.1	Sfur002233	0.977208827	0.000773237	HK1	Hexokinase	Metabolism;Metabolism;Human Diseases;Organismal Systems;Metabolism;Environmental Information Processing;Metabolism;Human Diseases;Metabolism;Metabolism;Human Diseases;Metabolism;Organismal Systems;Metabolism	Global and overview maps;Global and overview maps;Infectious diseases;Endocrine system;Carbohydrate metabolism;Signal transduction;Carbohydrate metabolism;Cancers;Carbohydrate metabolism;Carbohydrate metabolism;Endocrine and metabolic diseases;Carbohydrate metabolism;Digestive system;Biosynthesis of other secondary metabolites	ko01100//Metabolic pathways;ko01200//Carbon metabolism;ko05131//Shigellosis;ko04910//Insulin signaling pathway;ko00520//Amino sugar and nucleotide sugar metabolism;ko04066//HIF-1 signaling pathway;ko00010//Glycolysis / Gluconeogenesis;ko05230//Central carbon metabolism in cancer;ko00500//Starch and sucrose metabolism;ko00052//Galactose metabolism;ko04930//Type II diabetes mellitus;ko00051//Fructo…	K00844;K00844;K00844;K00844;K00844;K00844;K00844;K00844;K00844;K00844;K00844;K00844;K00844;K00844	-	GO:0004396//hexokinase activity;GO:0005524//ATP binding;GO:0005536//glucose binding	GO:0001678//cellular glucose homeostasis;GO:0006096//glycolytic process;GO:0019318//hexose metabolic process
MSTRG.25635.1	Sfur002233	-0.967408829	0.001575968	HK1	Hexokinase	Metabolism;Metabolism;Human Diseases;Organismal Systems;Metabolism;Environmental Information Processing;Metabolism;Human Diseases;Metabolism;Metabolism;Human Diseases;Metabolism;Organismal Systems;Metabolism	Global and overview maps;Global and overview maps;Infectious diseases;Endocrine system;Carbohydrate metabolism;Signal transduction;Carbohydrate metabolism;Cancers;Carbohydrate metabolism;Carbohydrate metabolism;Endocrine and metabolic diseases;Carbohydrate metabolism;Digestive system;Biosynthesis of other secondary metabolites	ko01100//Metabolic pathways;ko01200//Carbon metabolism;ko05131//Shigellosis;ko04910//Insulin signaling pathway;ko00520//Amino sugar and nucleotide sugar metabolism;ko04066//HIF-1 signaling pathway;ko00010//Glycolysis / Gluconeogenesis;ko05230//Central carbon metabolism in cancer;ko00500//Starch and sucrose metabolism;ko00052//Galactose metabolism;ko04930//Type II diabetes mellitus;ko00051//Fructo…	K00844;K00844;K00844;K00844;K00844;K00844;K00844;K00844;K00844;K00844;K00844;K00844;K00844;K00844	-	GO:0004396//hexokinase activity;GO:0005524//ATP binding;GO:0005536//glucose binding	GO:0001678//cellular glucose homeostasis;GO:0006096//glycolytic process;GO:0019318//hexose metabolic process
MSTRG.33771.1	Sfur002233	-0.956394745	0.002810672	HK1	Hexokinase	Metabolism;Metabolism;Human Diseases;Organismal Systems;Metabolism;Environmental Information Processing;Metabolism;Human Diseases;Metabolism;Metabolism;Human Diseases;Metabolism;Organismal Systems;Metabolism	Global and overview maps;Global and overview maps;Infectious diseases;Endocrine system;Carbohydrate metabolism;Signal transduction;Carbohydrate metabolism;Cancers;Carbohydrate metabolism;Carbohydrate metabolism;Endocrine and metabolic diseases;Carbohydrate metabolism;Digestive system;Biosynthesis of other secondary metabolites	ko01100//Metabolic pathways;ko01200//Carbon metabolism;ko05131//Shigellosis;ko04910//Insulin signaling pathway;ko00520//Amino sugar and nucleotide sugar metabolism;ko04066//HIF-1 signaling pathway;ko00010//Glycolysis / Gluconeogenesis;ko05230//Central carbon metabolism in cancer;ko00500//Starch and sucrose metabolism;ko00052//Galactose metabolism;ko04930//Type II diabetes mellitus;ko00051//Fructo…	K00844;K00844;K00844;K00844;K00844;K00844;K00844;K00844;K00844;K00844;K00844;K00844;K00844;K00844	-	GO:0004396//hexokinase activity;GO:0005524//ATP binding;GO:0005536//glucose binding	GO:0001678//cellular glucose homeostasis;GO:0006096//glycolytic process;GO:0019318//hexose metabolic process
MSTRG.18378.1	Sfur002233	0.994008966	5.37E-05	HK1	Hexokinase	Metabolism;Metabolism;Human Diseases;Organismal Systems;Metabolism;Environmental Information Processing;Metabolism;Human Diseases;Metabolism;Metabolism;Human Diseases;Metabolism;Organismal Systems;Metabolism	Global and overview maps;Global and overview maps;Infectious diseases;Endocrine system;Carbohydrate metabolism;Signal transduction;Carbohydrate metabolism;Cancers;Carbohydrate metabolism;Carbohydrate metabolism;Endocrine and metabolic diseases;Carbohydrate metabolism;Digestive system;Biosynthesis of other secondary metabolites	ko01100//Metabolic pathways;ko01200//Carbon metabolism;ko05131//Shigellosis;ko04910//Insulin signaling pathway;ko00520//Amino sugar and nucleotide sugar metabolism;ko04066//HIF-1 signaling pathway;ko00010//Glycolysis / Gluconeogenesis;ko05230//Central carbon metabolism in cancer;ko00500//Starch and sucrose metabolism;ko00052//Galactose metabolism;ko04930//Type II diabetes mellitus;ko00051//Fructo…	K00844;K00844;K00844;K00844;K00844;K00844;K00844;K00844;K00844;K00844;K00844;K00844;K00844;K00844	-	GO:0004396//hexokinase activity;GO:0005524//ATP binding;GO:0005536//glucose binding	GO:0001678//cellular glucose homeostasis;GO:0006096//glycolytic process;GO:0019318//hexose metabolic process
MSTRG.39924.1	Sfur002233	-0.97196361	0.00116804	HK1	Hexokinase	Metabolism;Metabolism;Human Diseases;Organismal Systems;Metabolism;Environmental Information Processing;Metabolism;Human Diseases;Metabolism;Metabolism;Human Diseases;Metabolism;Organismal Systems;Metabolism	Global and overview maps;Global and overview maps;Infectious diseases;Endocrine system;Carbohydrate metabolism;Signal transduction;Carbohydrate metabolism;Cancers;Carbohydrate metabolism;Carbohydrate metabolism;Endocrine and metabolic diseases;Carbohydrate metabolism;Digestive system;Biosynthesis of other secondary metabolites	ko01100//Metabolic pathways;ko01200//Carbon metabolism;ko05131//Shigellosis;ko04910//Insulin signaling pathway;ko00520//Amino sugar and nucleotide sugar metabolism;ko04066//HIF-1 signaling pathway;ko00010//Glycolysis / Gluconeogenesis;ko05230//Central carbon metabolism in cancer;ko00500//Starch and sucrose metabolism;ko00052//Galactose metabolism;ko04930//Type II diabetes mellitus;ko00051//Fructo…	K00844;K00844;K00844;K00844;K00844;K00844;K00844;K00844;K00844;K00844;K00844;K00844;K00844;K00844	-	GO:0004396//hexokinase activity;GO:0005524//ATP binding;GO:0005536//glucose binding	GO:0001678//cellular glucose homeostasis;GO:0006096//glycolytic process;GO:0019318//hexose metabolic process
MSTRG.25634.1	Sfur002233	-0.980439388	0.000570184	HK1	Hexokinase	Metabolism;Metabolism;Human Diseases;Organismal Systems;Metabolism;Environmental Information Processing;Metabolism;Human Diseases;Metabolism;Metabolism;Human Diseases;Metabolism;Organismal Systems;Metabolism	Global and overview maps;Global and overview maps;Infectious diseases;Endocrine system;Carbohydrate metabolism;Signal transduction;Carbohydrate metabolism;Cancers;Carbohydrate metabolism;Carbohydrate metabolism;Endocrine and metabolic diseases;Carbohydrate metabolism;Digestive system;Biosynthesis of other secondary metabolites	ko01100//Metabolic pathways;ko01200//Carbon metabolism;ko05131//Shigellosis;ko04910//Insulin signaling pathway;ko00520//Amino sugar and nucleotide sugar metabolism;ko04066//HIF-1 signaling pathway;ko00010//Glycolysis / Gluconeogenesis;ko05230//Central carbon metabolism in cancer;ko00500//Starch and sucrose metabolism;ko00052//Galactose metabolism;ko04930//Type II diabetes mellitus;ko00051//Fructo…	K00844;K00844;K00844;K00844;K00844;K00844;K00844;K00844;K00844;K00844;K00844;K00844;K00844;K00844	-	GO:0004396//hexokinase activity;GO:0005524//ATP binding;GO:0005536//glucose binding	GO:0001678//cellular glucose homeostasis;GO:0006096//glycolytic process;GO:0019318//hexose metabolic process
MSTRG.32766.1	Sfur002233	-0.961262285	0.002221851	HK1	Hexokinase	Metabolism;Metabolism;Human Diseases;Organismal Systems;Metabolism;Environmental Information Processing;Metabolism;Human Diseases;Metabolism;Metabolism;Human Diseases;Metabolism;Organismal Systems;Metabolism	Global and overview maps;Global and overview maps;Infectious diseases;Endocrine system;Carbohydrate metabolism;Signal transduction;Carbohydrate metabolism;Cancers;Carbohydrate metabolism;Carbohydrate metabolism;Endocrine and metabolic diseases;Carbohydrate metabolism;Digestive system;Biosynthesis of other secondary metabolites	ko01100//Metabolic pathways;ko01200//Carbon metabolism;ko05131//Shigellosis;ko04910//Insulin signaling pathway;ko00520//Amino sugar and nucleotide sugar metabolism;ko04066//HIF-1 signaling pathway;ko00010//Glycolysis / Gluconeogenesis;ko05230//Central carbon metabolism in cancer;ko00500//Starch and sucrose metabolism;ko00052//Galactose metabolism;ko04930//Type II diabetes mellitus;ko00051//Fructo…	K00844;K00844;K00844;K00844;K00844;K00844;K00844;K00844;K00844;K00844;K00844;K00844;K00844;K00844	-	GO:0004396//hexokinase activity;GO:0005524//ATP binding;GO:0005536//glucose binding	GO:0001678//cellular glucose homeostasis;GO:0006096//glycolytic process;GO:0019318//hexose metabolic process
MSTRG.2861.1	Sfur002233	-0.97432979	0.000979982	HK1	Hexokinase	Metabolism;Metabolism;Human Diseases;Organismal Systems;Metabolism;Environmental Information Processing;Metabolism;Human Diseases;Metabolism;Metabolism;Human Diseases;Metabolism;Organismal Systems;Metabolism	Global and overview maps;Global and overview maps;Infectious diseases;Endocrine system;Carbohydrate metabolism;Signal transduction;Carbohydrate metabolism;Cancers;Carbohydrate metabolism;Carbohydrate metabolism;Endocrine and metabolic diseases;Carbohydrate metabolism;Digestive system;Biosynthesis of other secondary metabolites	ko01100//Metabolic pathways;ko01200//Carbon metabolism;ko05131//Shigellosis;ko04910//Insulin signaling pathway;ko00520//Amino sugar and nucleotide sugar metabolism;ko04066//HIF-1 signaling pathway;ko00010//Glycolysis / Gluconeogenesis;ko05230//Central carbon metabolism in cancer;ko00500//Starch and sucrose metabolism;ko00052//Galactose metabolism;ko04930//Type II diabetes mellitus;ko00051//Fructo…	K00844;K00844;K00844;K00844;K00844;K00844;K00844;K00844;K00844;K00844;K00844;K00844;K00844;K00844	-	GO:0004396//hexokinase activity;GO:0005524//ATP binding;GO:0005536//glucose binding	GO:0001678//cellular glucose homeostasis;GO:0006096//glycolytic process;GO:0019318//hexose metabolic process
MSTRG.5417.1	Sfur002233	0.987127573	0.000247483	HK1	Hexokinase	Metabolism;Metabolism;Human Diseases;Organismal Systems;Metabolism;Environmental Information Processing;Metabolism;Human Diseases;Metabolism;Metabolism;Human Diseases;Metabolism;Organismal Systems;Metabolism	Global and overview maps;Global and overview maps;Infectious diseases;Endocrine system;Carbohydrate metabolism;Signal transduction;Carbohydrate metabolism;Cancers;Carbohydrate metabolism;Carbohydrate metabolism;Endocrine and metabolic diseases;Carbohydrate metabolism;Digestive system;Biosynthesis of other secondary metabolites	ko01100//Metabolic pathways;ko01200//Carbon metabolism;ko05131//Shigellosis;ko04910//Insulin signaling pathway;ko00520//Amino sugar and nucleotide sugar metabolism;ko04066//HIF-1 signaling pathway;ko00010//Glycolysis / Gluconeogenesis;ko05230//Central carbon metabolism in cancer;ko00500//Starch and sucrose metabolism;ko00052//Galactose metabolism;ko04930//Type II diabetes mellitus;ko00051//Fructo…	K00844;K00844;K00844;K00844;K00844;K00844;K00844;K00844;K00844;K00844;K00844;K00844;K00844;K00844	-	GO:0004396//hexokinase activity;GO:0005524//ATP binding;GO:0005536//glucose binding	GO:0001678//cellular glucose homeostasis;GO:0006096//glycolytic process;GO:0019318//hexose metabolic process
MSTRG.25629.14	Sfur002233	-0.981792049	0.000494276	HK1	Hexokinase	Metabolism;Metabolism;Human Diseases;Organismal Systems;Metabolism;Environmental Information Processing;Metabolism;Human Diseases;Metabolism;Metabolism;Human Diseases;Metabolism;Organismal Systems;Metabolism	Global and overview maps;Global and overview maps;Infectious diseases;Endocrine system;Carbohydrate metabolism;Signal transduction;Carbohydrate metabolism;Cancers;Carbohydrate metabolism;Carbohydrate metabolism;Endocrine and metabolic diseases;Carbohydrate metabolism;Digestive system;Biosynthesis of other secondary metabolites	ko01100//Metabolic pathways;ko01200//Carbon metabolism;ko05131//Shigellosis;ko04910//Insulin signaling pathway;ko00520//Amino sugar and nucleotide sugar metabolism;ko04066//HIF-1 signaling pathway;ko00010//Glycolysis / Gluconeogenesis;ko05230//Central carbon metabolism in cancer;ko00500//Starch and sucrose metabolism;ko00052//Galactose metabolism;ko04930//Type II diabetes mellitus;ko00051//Fructo…	K00844;K00844;K00844;K00844;K00844;K00844;K00844;K00844;K00844;K00844;K00844;K00844;K00844;K00844	-	GO:0004396//hexokinase activity;GO:0005524//ATP binding;GO:0005536//glucose binding	GO:0001678//cellular glucose homeostasis;GO:0006096//glycolytic process;GO:0019318//hexose metabolic process
MSTRG.27226.1	Sfur002233	-0.95300265	0.003261224	HK1	Hexokinase	Metabolism;Metabolism;Human Diseases;Organismal Systems;Metabolism;Environmental Information Processing;Metabolism;Human Diseases;Metabolism;Metabolism;Human Diseases;Metabolism;Organismal Systems;Metabolism	Global and overview maps;Global and overview maps;Infectious diseases;Endocrine system;Carbohydrate metabolism;Signal transduction;Carbohydrate metabolism;Cancers;Carbohydrate metabolism;Carbohydrate metabolism;Endocrine and metabolic diseases;Carbohydrate metabolism;Digestive system;Biosynthesis of other secondary metabolites	ko01100//Metabolic pathways;ko01200//Carbon metabolism;ko05131//Shigellosis;ko04910//Insulin signaling pathway;ko00520//Amino sugar and nucleotide sugar metabolism;ko04066//HIF-1 signaling pathway;ko00010//Glycolysis / Gluconeogenesis;ko05230//Central carbon metabolism in cancer;ko00500//Starch and sucrose metabolism;ko00052//Galactose metabolism;ko04930//Type II diabetes mellitus;ko00051//Fructo…	K00844;K00844;K00844;K00844;K00844;K00844;K00844;K00844;K00844;K00844;K00844;K00844;K00844;K00844	-	GO:0004396//hexokinase activity;GO:0005524//ATP binding;GO:0005536//glucose binding	GO:0001678//cellular glucose homeostasis;GO:0006096//glycolytic process;GO:0019318//hexose metabolic process
MSTRG.24931.1	Sfur002233	-0.980247738	0.000581375	HK1	Hexokinase	Metabolism;Metabolism;Human Diseases;Organismal Systems;Metabolism;Environmental Information Processing;Metabolism;Human Diseases;Metabolism;Metabolism;Human Diseases;Metabolism;Organismal Systems;Metabolism	Global and overview maps;Global and overview maps;Infectious diseases;Endocrine system;Carbohydrate metabolism;Signal transduction;Carbohydrate metabolism;Cancers;Carbohydrate metabolism;Carbohydrate metabolism;Endocrine and metabolic diseases;Carbohydrate metabolism;Digestive system;Biosynthesis of other secondary metabolites	ko01100//Metabolic pathways;ko01200//Carbon metabolism;ko05131//Shigellosis;ko04910//Insulin signaling pathway;ko00520//Amino sugar and nucleotide sugar metabolism;ko04066//HIF-1 signaling pathway;ko00010//Glycolysis / Gluconeogenesis;ko05230//Central carbon metabolism in cancer;ko00500//Starch and sucrose metabolism;ko00052//Galactose metabolism;ko04930//Type II diabetes mellitus;ko00051//Fructo…	K00844;K00844;K00844;K00844;K00844;K00844;K00844;K00844;K00844;K00844;K00844;K00844;K00844;K00844	-	GO:0004396//hexokinase activity;GO:0005524//ATP binding;GO:0005536//glucose binding	GO:0001678//cellular glucose homeostasis;GO:0006096//glycolytic process;GO:0019318//hexose metabolic process
MSTRG.22908.1	Sfur002233	-0.968724197	0.001451967	HK1	Hexokinase	Metabolism;Metabolism;Human Diseases;Organismal Systems;Metabolism;Environmental Information Processing;Metabolism;Human Diseases;Metabolism;Metabolism;Human Diseases;Metabolism;Organismal Systems;Metabolism	Global and overview maps;Global and overview maps;Infectious diseases;Endocrine system;Carbohydrate metabolism;Signal transduction;Carbohydrate metabolism;Cancers;Carbohydrate metabolism;Carbohydrate metabolism;Endocrine and metabolic diseases;Carbohydrate metabolism;Digestive system;Biosynthesis of other secondary metabolites	ko01100//Metabolic pathways;ko01200//Carbon metabolism;ko05131//Shigellosis;ko04910//Insulin signaling pathway;ko00520//Amino sugar and nucleotide sugar metabolism;ko04066//HIF-1 signaling pathway;ko00010//Glycolysis / Gluconeogenesis;ko05230//Central carbon metabolism in cancer;ko00500//Starch and sucrose metabolism;ko00052//Galactose metabolism;ko04930//Type II diabetes mellitus;ko00051//Fructo…	K00844;K00844;K00844;K00844;K00844;K00844;K00844;K00844;K00844;K00844;K00844;K00844;K00844;K00844	-	GO:0004396//hexokinase activity;GO:0005524//ATP binding;GO:0005536//glucose binding	GO:0001678//cellular glucose homeostasis;GO:0006096//glycolytic process;GO:0019318//hexose metabolic process
MSTRG.38291.4	Sfur002233	-0.993091876	7.14E-05	HK1	Hexokinase	Metabolism;Metabolism;Human Diseases;Organismal Systems;Metabolism;Environmental Information Processing;Metabolism;Human Diseases;Metabolism;Metabolism;Human Diseases;Metabolism;Organismal Systems;Metabolism	Global and overview maps;Global and overview maps;Infectious diseases;Endocrine system;Carbohydrate metabolism;Signal transduction;Carbohydrate metabolism;Cancers;Carbohydrate metabolism;Carbohydrate metabolism;Endocrine and metabolic diseases;Carbohydrate metabolism;Digestive system;Biosynthesis of other secondary metabolites	ko01100//Metabolic pathways;ko01200//Carbon metabolism;ko05131//Shigellosis;ko04910//Insulin signaling pathway;ko00520//Amino sugar and nucleotide sugar metabolism;ko04066//HIF-1 signaling pathway;ko00010//Glycolysis / Gluconeogenesis;ko05230//Central carbon metabolism in cancer;ko00500//Starch and sucrose metabolism;ko00052//Galactose metabolism;ko04930//Type II diabetes mellitus;ko00051//Fructo…	K00844;K00844;K00844;K00844;K00844;K00844;K00844;K00844;K00844;K00844;K00844;K00844;K00844;K00844	-	GO:0004396//hexokinase activity;GO:0005524//ATP binding;GO:0005536//glucose binding	GO:0001678//cellular glucose homeostasis;GO:0006096//glycolytic process;GO:0019318//hexose metabolic process
MSTRG.21441.2	Sfur002233	-0.974931683	0.000934754	HK1	Hexokinase	Metabolism;Metabolism;Human Diseases;Organismal Systems;Metabolism;Environmental Information Processing;Metabolism;Human Diseases;Metabolism;Metabolism;Human Diseases;Metabolism;Organismal Systems;Metabolism	Global and overview maps;Global and overview maps;Infectious diseases;Endocrine system;Carbohydrate metabolism;Signal transduction;Carbohydrate metabolism;Cancers;Carbohydrate metabolism;Carbohydrate metabolism;Endocrine and metabolic diseases;Carbohydrate metabolism;Digestive system;Biosynthesis of other secondary metabolites	ko01100//Metabolic pathways;ko01200//Carbon metabolism;ko05131//Shigellosis;ko04910//Insulin signaling pathway;ko00520//Amino sugar and nucleotide sugar metabolism;ko04066//HIF-1 signaling pathway;ko00010//Glycolysis / Gluconeogenesis;ko05230//Central carbon metabolism in cancer;ko00500//Starch and sucrose metabolism;ko00052//Galactose metabolism;ko04930//Type II diabetes mellitus;ko00051//Fructo…	K00844;K00844;K00844;K00844;K00844;K00844;K00844;K00844;K00844;K00844;K00844;K00844;K00844;K00844	-	GO:0004396//hexokinase activity;GO:0005524//ATP binding;GO:0005536//glucose binding	GO:0001678//cellular glucose homeostasis;GO:0006096//glycolytic process;GO:0019318//hexose metabolic process
MSTRG.33816.1	Sfur002233	0.9580114	0.00260755	HK1	Hexokinase	Metabolism;Metabolism;Human Diseases;Organismal Systems;Metabolism;Environmental Information Processing;Metabolism;Human Diseases;Metabolism;Metabolism;Human Diseases;Metabolism;Organismal Systems;Metabolism	Global and overview maps;Global and overview maps;Infectious diseases;Endocrine system;Carbohydrate metabolism;Signal transduction;Carbohydrate metabolism;Cancers;Carbohydrate metabolism;Carbohydrate metabolism;Endocrine and metabolic diseases;Carbohydrate metabolism;Digestive system;Biosynthesis of other secondary metabolites	ko01100//Metabolic pathways;ko01200//Carbon metabolism;ko05131//Shigellosis;ko04910//Insulin signaling pathway;ko00520//Amino sugar and nucleotide sugar metabolism;ko04066//HIF-1 signaling pathway;ko00010//Glycolysis / Gluconeogenesis;ko05230//Central carbon metabolism in cancer;ko00500//Starch and sucrose metabolism;ko00052//Galactose metabolism;ko04930//Type II diabetes mellitus;ko00051//Fructo…	K00844;K00844;K00844;K00844;K00844;K00844;K00844;K00844;K00844;K00844;K00844;K00844;K00844;K00844	-	GO:0004396//hexokinase activity;GO:0005524//ATP binding;GO:0005536//glucose binding	GO:0001678//cellular glucose homeostasis;GO:0006096//glycolytic process;GO:0019318//hexose metabolic process
MSTRG.11054.2	Sfur002233	0.952980164	0.00326432	HK1	Hexokinase	Metabolism;Metabolism;Human Diseases;Organismal Systems;Metabolism;Environmental Information Processing;Metabolism;Human Diseases;Metabolism;Metabolism;Human Diseases;Metabolism;Organismal Systems;Metabolism	Global and overview maps;Global and overview maps;Infectious diseases;Endocrine system;Carbohydrate metabolism;Signal transduction;Carbohydrate metabolism;Cancers;Carbohydrate metabolism;Carbohydrate metabolism;Endocrine and metabolic diseases;Carbohydrate metabolism;Digestive system;Biosynthesis of other secondary metabolites	ko01100//Metabolic pathways;ko01200//Carbon metabolism;ko05131//Shigellosis;ko04910//Insulin signaling pathway;ko00520//Amino sugar and nucleotide sugar metabolism;ko04066//HIF-1 signaling pathway;ko00010//Glycolysis / Gluconeogenesis;ko05230//Central carbon metabolism in cancer;ko00500//Starch and sucrose metabolism;ko00052//Galactose metabolism;ko04930//Type II diabetes mellitus;ko00051//Fructo…	K00844;K00844;K00844;K00844;K00844;K00844;K00844;K00844;K00844;K00844;K00844;K00844;K00844;K00844	-	GO:0004396//hexokinase activity;GO:0005524//ATP binding;GO:0005536//glucose binding	GO:0001678//cellular glucose homeostasis;GO:0006096//glycolytic process;GO:0019318//hexose metabolic process
MSTRG.20535.1	Sfur002233	0.990960356	0.000122203	HK1	Hexokinase	Metabolism;Metabolism;Human Diseases;Organismal Systems;Metabolism;Environmental Information Processing;Metabolism;Human Diseases;Metabolism;Metabolism;Human Diseases;Metabolism;Organismal Systems;Metabolism	Global and overview maps;Global and overview maps;Infectious diseases;Endocrine system;Carbohydrate metabolism;Signal transduction;Carbohydrate metabolism;Cancers;Carbohydrate metabolism;Carbohydrate metabolism;Endocrine and metabolic diseases;Carbohydrate metabolism;Digestive system;Biosynthesis of other secondary metabolites	ko01100//Metabolic pathways;ko01200//Carbon metabolism;ko05131//Shigellosis;ko04910//Insulin signaling pathway;ko00520//Amino sugar and nucleotide sugar metabolism;ko04066//HIF-1 signaling pathway;ko00010//Glycolysis / Gluconeogenesis;ko05230//Central carbon metabolism in cancer;ko00500//Starch and sucrose metabolism;ko00052//Galactose metabolism;ko04930//Type II diabetes mellitus;ko00051//Fructo…	K00844;K00844;K00844;K00844;K00844;K00844;K00844;K00844;K00844;K00844;K00844;K00844;K00844;K00844	-	GO:0004396//hexokinase activity;GO:0005524//ATP binding;GO:0005536//glucose binding	GO:0001678//cellular glucose homeostasis;GO:0006096//glycolytic process;GO:0019318//hexose metabolic process
MSTRG.11140.1	Sfur002233	0.987298697	0.00024096	HK1	Hexokinase	Metabolism;Metabolism;Human Diseases;Organismal Systems;Metabolism;Environmental Information Processing;Metabolism;Human Diseases;Metabolism;Metabolism;Human Diseases;Metabolism;Organismal Systems;Metabolism	Global and overview maps;Global and overview maps;Infectious diseases;Endocrine system;Carbohydrate metabolism;Signal transduction;Carbohydrate metabolism;Cancers;Carbohydrate metabolism;Carbohydrate metabolism;Endocrine and metabolic diseases;Carbohydrate metabolism;Digestive system;Biosynthesis of other secondary metabolites	ko01100//Metabolic pathways;ko01200//Carbon metabolism;ko05131//Shigellosis;ko04910//Insulin signaling pathway;ko00520//Amino sugar and nucleotide sugar metabolism;ko04066//HIF-1 signaling pathway;ko00010//Glycolysis / Gluconeogenesis;ko05230//Central carbon metabolism in cancer;ko00500//Starch and sucrose metabolism;ko00052//Galactose metabolism;ko04930//Type II diabetes mellitus;ko00051//Fructo…	K00844;K00844;K00844;K00844;K00844;K00844;K00844;K00844;K00844;K00844;K00844;K00844;K00844;K00844	-	GO:0004396//hexokinase activity;GO:0005524//ATP binding;GO:0005536//glucose binding	GO:0001678//cellular glucose homeostasis;GO:0006096//glycolytic process;GO:0019318//hexose metabolic process
MSTRG.14616.1	Sfur002233	-0.961863072	0.002153904	HK1	Hexokinase	Metabolism;Metabolism;Human Diseases;Organismal Systems;Metabolism;Environmental Information Processing;Metabolism;Human Diseases;Metabolism;Metabolism;Human Diseases;Metabolism;Organismal Systems;Metabolism	Global and overview maps;Global and overview maps;Infectious diseases;Endocrine system;Carbohydrate metabolism;Signal transduction;Carbohydrate metabolism;Cancers;Carbohydrate metabolism;Carbohydrate metabolism;Endocrine and metabolic diseases;Carbohydrate metabolism;Digestive system;Biosynthesis of other secondary metabolites	ko01100//Metabolic pathways;ko01200//Carbon metabolism;ko05131//Shigellosis;ko04910//Insulin signaling pathway;ko00520//Amino sugar and nucleotide sugar metabolism;ko04066//HIF-1 signaling pathway;ko00010//Glycolysis / Gluconeogenesis;ko05230//Central carbon metabolism in cancer;ko00500//Starch and sucrose metabolism;ko00052//Galactose metabolism;ko04930//Type II diabetes mellitus;ko00051//Fructo…	K00844;K00844;K00844;K00844;K00844;K00844;K00844;K00844;K00844;K00844;K00844;K00844;K00844;K00844	-	GO:0004396//hexokinase activity;GO:0005524//ATP binding;GO:0005536//glucose binding	GO:0001678//cellular glucose homeostasis;GO:0006096//glycolytic process;GO:0019318//hexose metabolic process
MSTRG.25578.1	Sfur002233	-0.96339528	0.001985335	HK1	Hexokinase	Metabolism;Metabolism;Human Diseases;Organismal Systems;Metabolism;Environmental Information Processing;Metabolism;Human Diseases;Metabolism;Metabolism;Human Diseases;Metabolism;Organismal Systems;Metabolism	Global and overview maps;Global and overview maps;Infectious diseases;Endocrine system;Carbohydrate metabolism;Signal transduction;Carbohydrate metabolism;Cancers;Carbohydrate metabolism;Carbohydrate metabolism;Endocrine and metabolic diseases;Carbohydrate metabolism;Digestive system;Biosynthesis of other secondary metabolites	ko01100//Metabolic pathways;ko01200//Carbon metabolism;ko05131//Shigellosis;ko04910//Insulin signaling pathway;ko00520//Amino sugar and nucleotide sugar metabolism;ko04066//HIF-1 signaling pathway;ko00010//Glycolysis / Gluconeogenesis;ko05230//Central carbon metabolism in cancer;ko00500//Starch and sucrose metabolism;ko00052//Galactose metabolism;ko04930//Type II diabetes mellitus;ko00051//Fructo…	K00844;K00844;K00844;K00844;K00844;K00844;K00844;K00844;K00844;K00844;K00844;K00844;K00844;K00844	-	GO:0004396//hexokinase activity;GO:0005524//ATP binding;GO:0005536//glucose binding	GO:0001678//cellular glucose homeostasis;GO:0006096//glycolytic process;GO:0019318//hexose metabolic process
MSTRG.7214.1	Sfur002233	0.956827741	0.002755533	HK1	Hexokinase	Metabolism;Metabolism;Human Diseases;Organismal Systems;Metabolism;Environmental Information Processing;Metabolism;Human Diseases;Metabolism;Metabolism;Human Diseases;Metabolism;Organismal Systems;Metabolism	Global and overview maps;Global and overview maps;Infectious diseases;Endocrine system;Carbohydrate metabolism;Signal transduction;Carbohydrate metabolism;Cancers;Carbohydrate metabolism;Carbohydrate metabolism;Endocrine and metabolic diseases;Carbohydrate metabolism;Digestive system;Biosynthesis of other secondary metabolites	ko01100//Metabolic pathways;ko01200//Carbon metabolism;ko05131//Shigellosis;ko04910//Insulin signaling pathway;ko00520//Amino sugar and nucleotide sugar metabolism;ko04066//HIF-1 signaling pathway;ko00010//Glycolysis / Gluconeogenesis;ko05230//Central carbon metabolism in cancer;ko00500//Starch and sucrose metabolism;ko00052//Galactose metabolism;ko04930//Type II diabetes mellitus;ko00051//Fructo…	K00844;K00844;K00844;K00844;K00844;K00844;K00844;K00844;K00844;K00844;K00844;K00844;K00844;K00844	-	GO:0004396//hexokinase activity;GO:0005524//ATP binding;GO:0005536//glucose binding	GO:0001678//cellular glucose homeostasis;GO:0006096//glycolytic process;GO:0019318//hexose metabolic process
MSTRG.21030.1	Sfur002233	-0.950361278	0.003634849	HK1	Hexokinase	Metabolism;Metabolism;Human Diseases;Organismal Systems;Metabolism;Environmental Information Processing;Metabolism;Human Diseases;Metabolism;Metabolism;Human Diseases;Metabolism;Organismal Systems;Metabolism	Global and overview maps;Global and overview maps;Infectious diseases;Endocrine system;Carbohydrate metabolism;Signal transduction;Carbohydrate metabolism;Cancers;Carbohydrate metabolism;Carbohydrate metabolism;Endocrine and metabolic diseases;Carbohydrate metabolism;Digestive system;Biosynthesis of other secondary metabolites	ko01100//Metabolic pathways;ko01200//Carbon metabolism;ko05131//Shigellosis;ko04910//Insulin signaling pathway;ko00520//Amino sugar and nucleotide sugar metabolism;ko04066//HIF-1 signaling pathway;ko00010//Glycolysis / Gluconeogenesis;ko05230//Central carbon metabolism in cancer;ko00500//Starch and sucrose metabolism;ko00052//Galactose metabolism;ko04930//Type II diabetes mellitus;ko00051//Fructo…	K00844;K00844;K00844;K00844;K00844;K00844;K00844;K00844;K00844;K00844;K00844;K00844;K00844;K00844	-	GO:0004396//hexokinase activity;GO:0005524//ATP binding;GO:0005536//glucose binding	GO:0001678//cellular glucose homeostasis;GO:0006096//glycolytic process;GO:0019318//hexose metabolic process
MSTRG.4870.1	Sfur002233	-0.961323879	0.002214837	HK1	Hexokinase	Metabolism;Metabolism;Human Diseases;Organismal Systems;Metabolism;Environmental Information Processing;Metabolism;Human Diseases;Metabolism;Metabolism;Human Diseases;Metabolism;Organismal Systems;Metabolism	Global and overview maps;Global and overview maps;Infectious diseases;Endocrine system;Carbohydrate metabolism;Signal transduction;Carbohydrate metabolism;Cancers;Carbohydrate metabolism;Carbohydrate metabolism;Endocrine and metabolic diseases;Carbohydrate metabolism;Digestive system;Biosynthesis of other secondary metabolites	ko01100//Metabolic pathways;ko01200//Carbon metabolism;ko05131//Shigellosis;ko04910//Insulin signaling pathway;ko00520//Amino sugar and nucleotide sugar metabolism;ko04066//HIF-1 signaling pathway;ko00010//Glycolysis / Gluconeogenesis;ko05230//Central carbon metabolism in cancer;ko00500//Starch and sucrose metabolism;ko00052//Galactose metabolism;ko04930//Type II diabetes mellitus;ko00051//Fructo…	K00844;K00844;K00844;K00844;K00844;K00844;K00844;K00844;K00844;K00844;K00844;K00844;K00844;K00844	-	GO:0004396//hexokinase activity;GO:0005524//ATP binding;GO:0005536//glucose binding	GO:0001678//cellular glucose homeostasis;GO:0006096//glycolytic process;GO:0019318//hexose metabolic process
MSTRG.24154.1	Sfur002233	0.97274138	0.001104422	HK1	Hexokinase	Metabolism;Metabolism;Human Diseases;Organismal Systems;Metabolism;Environmental Information Processing;Metabolism;Human Diseases;Metabolism;Metabolism;Human Diseases;Metabolism;Organismal Systems;Metabolism	Global and overview maps;Global and overview maps;Infectious diseases;Endocrine system;Carbohydrate metabolism;Signal transduction;Carbohydrate metabolism;Cancers;Carbohydrate metabolism;Carbohydrate metabolism;Endocrine and metabolic diseases;Carbohydrate metabolism;Digestive system;Biosynthesis of other secondary metabolites	ko01100//Metabolic pathways;ko01200//Carbon metabolism;ko05131//Shigellosis;ko04910//Insulin signaling pathway;ko00520//Amino sugar and nucleotide sugar metabolism;ko04066//HIF-1 signaling pathway;ko00010//Glycolysis / Gluconeogenesis;ko05230//Central carbon metabolism in cancer;ko00500//Starch and sucrose metabolism;ko00052//Galactose metabolism;ko04930//Type II diabetes mellitus;ko00051//Fructo…	K00844;K00844;K00844;K00844;K00844;K00844;K00844;K00844;K00844;K00844;K00844;K00844;K00844;K00844	-	GO:0004396//hexokinase activity;GO:0005524//ATP binding;GO:0005536//glucose binding	GO:0001678//cellular glucose homeostasis;GO:0006096//glycolytic process;GO:0019318//hexose metabolic process
MSTRG.22706.3	Sfur002233	-0.967898106	0.001529256	HK1	Hexokinase	Metabolism;Metabolism;Human Diseases;Organismal Systems;Metabolism;Environmental Information Processing;Metabolism;Human Diseases;Metabolism;Metabolism;Human Diseases;Metabolism;Organismal Systems;Metabolism	Global and overview maps;Global and overview maps;Infectious diseases;Endocrine system;Carbohydrate metabolism;Signal transduction;Carbohydrate metabolism;Cancers;Carbohydrate metabolism;Carbohydrate metabolism;Endocrine and metabolic diseases;Carbohydrate metabolism;Digestive system;Biosynthesis of other secondary metabolites	ko01100//Metabolic pathways;ko01200//Carbon metabolism;ko05131//Shigellosis;ko04910//Insulin signaling pathway;ko00520//Amino sugar and nucleotide sugar metabolism;ko04066//HIF-1 signaling pathway;ko00010//Glycolysis / Gluconeogenesis;ko05230//Central carbon metabolism in cancer;ko00500//Starch and sucrose metabolism;ko00052//Galactose metabolism;ko04930//Type II diabetes mellitus;ko00051//Fructo…	K00844;K00844;K00844;K00844;K00844;K00844;K00844;K00844;K00844;K00844;K00844;K00844;K00844;K00844	-	GO:0004396//hexokinase activity;GO:0005524//ATP binding;GO:0005536//glucose binding	GO:0001678//cellular glucose homeostasis;GO:0006096//glycolytic process;GO:0019318//hexose metabolic process
MSTRG.31094.1	Sfur002233	-0.952504478	0.003330166	HK1	Hexokinase	Metabolism;Metabolism;Human Diseases;Organismal Systems;Metabolism;Environmental Information Processing;Metabolism;Human Diseases;Metabolism;Metabolism;Human Diseases;Metabolism;Organismal Systems;Metabolism	Global and overview maps;Global and overview maps;Infectious diseases;Endocrine system;Carbohydrate metabolism;Signal transduction;Carbohydrate metabolism;Cancers;Carbohydrate metabolism;Carbohydrate metabolism;Endocrine and metabolic diseases;Carbohydrate metabolism;Digestive system;Biosynthesis of other secondary metabolites	ko01100//Metabolic pathways;ko01200//Carbon metabolism;ko05131//Shigellosis;ko04910//Insulin signaling pathway;ko00520//Amino sugar and nucleotide sugar metabolism;ko04066//HIF-1 signaling pathway;ko00010//Glycolysis / Gluconeogenesis;ko05230//Central carbon metabolism in cancer;ko00500//Starch and sucrose metabolism;ko00052//Galactose metabolism;ko04930//Type II diabetes mellitus;ko00051//Fructo…	K00844;K00844;K00844;K00844;K00844;K00844;K00844;K00844;K00844;K00844;K00844;K00844;K00844;K00844	-	GO:0004396//hexokinase activity;GO:0005524//ATP binding;GO:0005536//glucose binding	GO:0001678//cellular glucose homeostasis;GO:0006096//glycolytic process;GO:0019318//hexose metabolic process
MSTRG.3820.1	Sfur002233	-0.969786804	0.001355466	HK1	Hexokinase	Metabolism;Metabolism;Human Diseases;Organismal Systems;Metabolism;Environmental Information Processing;Metabolism;Human Diseases;Metabolism;Metabolism;Human Diseases;Metabolism;Organismal Systems;Metabolism	Global and overview maps;Global and overview maps;Infectious diseases;Endocrine system;Carbohydrate metabolism;Signal transduction;Carbohydrate metabolism;Cancers;Carbohydrate metabolism;Carbohydrate metabolism;Endocrine and metabolic diseases;Carbohydrate metabolism;Digestive system;Biosynthesis of other secondary metabolites	ko01100//Metabolic pathways;ko01200//Carbon metabolism;ko05131//Shigellosis;ko04910//Insulin signaling pathway;ko00520//Amino sugar and nucleotide sugar metabolism;ko04066//HIF-1 signaling pathway;ko00010//Glycolysis / Gluconeogenesis;ko05230//Central carbon metabolism in cancer;ko00500//Starch and sucrose metabolism;ko00052//Galactose metabolism;ko04930//Type II diabetes mellitus;ko00051//Fructo…	K00844;K00844;K00844;K00844;K00844;K00844;K00844;K00844;K00844;K00844;K00844;K00844;K00844;K00844	-	GO:0004396//hexokinase activity;GO:0005524//ATP binding;GO:0005536//glucose binding	GO:0001678//cellular glucose homeostasis;GO:0006096//glycolytic process;GO:0019318//hexose metabolic process
MSTRG.24932.1	Sfur002233	-0.985533102	0.000312423	HK1	Hexokinase	Metabolism;Metabolism;Human Diseases;Organismal Systems;Metabolism;Environmental Information Processing;Metabolism;Human Diseases;Metabolism;Metabolism;Human Diseases;Metabolism;Organismal Systems;Metabolism	Global and overview maps;Global and overview maps;Infectious diseases;Endocrine system;Carbohydrate metabolism;Signal transduction;Carbohydrate metabolism;Cancers;Carbohydrate metabolism;Carbohydrate metabolism;Endocrine and metabolic diseases;Carbohydrate metabolism;Digestive system;Biosynthesis of other secondary metabolites	ko01100//Metabolic pathways;ko01200//Carbon metabolism;ko05131//Shigellosis;ko04910//Insulin signaling pathway;ko00520//Amino sugar and nucleotide sugar metabolism;ko04066//HIF-1 signaling pathway;ko00010//Glycolysis / Gluconeogenesis;ko05230//Central carbon metabolism in cancer;ko00500//Starch and sucrose metabolism;ko00052//Galactose metabolism;ko04930//Type II diabetes mellitus;ko00051//Fructo…	K00844;K00844;K00844;K00844;K00844;K00844;K00844;K00844;K00844;K00844;K00844;K00844;K00844;K00844	-	GO:0004396//hexokinase activity;GO:0005524//ATP binding;GO:0005536//glucose binding	GO:0001678//cellular glucose homeostasis;GO:0006096//glycolytic process;GO:0019318//hexose metabolic process
MSTRG.37501.1	Sfur002233	-0.970834716	0.001263517	HK1	Hexokinase	Metabolism;Metabolism;Human Diseases;Organismal Systems;Metabolism;Environmental Information Processing;Metabolism;Human Diseases;Metabolism;Metabolism;Human Diseases;Metabolism;Organismal Systems;Metabolism	Global and overview maps;Global and overview maps;Infectious diseases;Endocrine system;Carbohydrate metabolism;Signal transduction;Carbohydrate metabolism;Cancers;Carbohydrate metabolism;Carbohydrate metabolism;Endocrine and metabolic diseases;Carbohydrate metabolism;Digestive system;Biosynthesis of other secondary metabolites	ko01100//Metabolic pathways;ko01200//Carbon metabolism;ko05131//Shigellosis;ko04910//Insulin signaling pathway;ko00520//Amino sugar and nucleotide sugar metabolism;ko04066//HIF-1 signaling pathway;ko00010//Glycolysis / Gluconeogenesis;ko05230//Central carbon metabolism in cancer;ko00500//Starch and sucrose metabolism;ko00052//Galactose metabolism;ko04930//Type II diabetes mellitus;ko00051//Fructo…	K00844;K00844;K00844;K00844;K00844;K00844;K00844;K00844;K00844;K00844;K00844;K00844;K00844;K00844	-	GO:0004396//hexokinase activity;GO:0005524//ATP binding;GO:0005536//glucose binding	GO:0001678//cellular glucose homeostasis;GO:0006096//glycolytic process;GO:0019318//hexose metabolic process
MSTRG.3765.1	Sfur002233	-0.975537968	0.000890268	HK1	Hexokinase	Metabolism;Metabolism;Human Diseases;Organismal Systems;Metabolism;Environmental Information Processing;Metabolism;Human Diseases;Metabolism;Metabolism;Human Diseases;Metabolism;Organismal Systems;Metabolism	Global and overview maps;Global and overview maps;Infectious diseases;Endocrine system;Carbohydrate metabolism;Signal transduction;Carbohydrate metabolism;Cancers;Carbohydrate metabolism;Carbohydrate metabolism;Endocrine and metabolic diseases;Carbohydrate metabolism;Digestive system;Biosynthesis of other secondary metabolites	ko01100//Metabolic pathways;ko01200//Carbon metabolism;ko05131//Shigellosis;ko04910//Insulin signaling pathway;ko00520//Amino sugar and nucleotide sugar metabolism;ko04066//HIF-1 signaling pathway;ko00010//Glycolysis / Gluconeogenesis;ko05230//Central carbon metabolism in cancer;ko00500//Starch and sucrose metabolism;ko00052//Galactose metabolism;ko04930//Type II diabetes mellitus;ko00051//Fructo…	K00844;K00844;K00844;K00844;K00844;K00844;K00844;K00844;K00844;K00844;K00844;K00844;K00844;K00844	-	GO:0004396//hexokinase activity;GO:0005524//ATP binding;GO:0005536//glucose binding	GO:0001678//cellular glucose homeostasis;GO:0006096//glycolytic process;GO:0019318//hexose metabolic process
MSTRG.23081.2	Sfur002233	-0.974387331	0.000975612	HK1	Hexokinase	Metabolism;Metabolism;Human Diseases;Organismal Systems;Metabolism;Environmental Information Processing;Metabolism;Human Diseases;Metabolism;Metabolism;Human Diseases;Metabolism;Organismal Systems;Metabolism	Global and overview maps;Global and overview maps;Infectious diseases;Endocrine system;Carbohydrate metabolism;Signal transduction;Carbohydrate metabolism;Cancers;Carbohydrate metabolism;Carbohydrate metabolism;Endocrine and metabolic diseases;Carbohydrate metabolism;Digestive system;Biosynthesis of other secondary metabolites	ko01100//Metabolic pathways;ko01200//Carbon metabolism;ko05131//Shigellosis;ko04910//Insulin signaling pathway;ko00520//Amino sugar and nucleotide sugar metabolism;ko04066//HIF-1 signaling pathway;ko00010//Glycolysis / Gluconeogenesis;ko05230//Central carbon metabolism in cancer;ko00500//Starch and sucrose metabolism;ko00052//Galactose metabolism;ko04930//Type II diabetes mellitus;ko00051//Fructo…	K00844;K00844;K00844;K00844;K00844;K00844;K00844;K00844;K00844;K00844;K00844;K00844;K00844;K00844	-	GO:0004396//hexokinase activity;GO:0005524//ATP binding;GO:0005536//glucose binding	GO:0001678//cellular glucose homeostasis;GO:0006096//glycolytic process;GO:0019318//hexose metabolic process
MSTRG.33942.1	Sfur002233	0.965228832	0.001792531	HK1	Hexokinase	Metabolism;Metabolism;Human Diseases;Organismal Systems;Metabolism;Environmental Information Processing;Metabolism;Human Diseases;Metabolism;Metabolism;Human Diseases;Metabolism;Organismal Systems;Metabolism	Global and overview maps;Global and overview maps;Infectious diseases;Endocrine system;Carbohydrate metabolism;Signal transduction;Carbohydrate metabolism;Cancers;Carbohydrate metabolism;Carbohydrate metabolism;Endocrine and metabolic diseases;Carbohydrate metabolism;Digestive system;Biosynthesis of other secondary metabolites	ko01100//Metabolic pathways;ko01200//Carbon metabolism;ko05131//Shigellosis;ko04910//Insulin signaling pathway;ko00520//Amino sugar and nucleotide sugar metabolism;ko04066//HIF-1 signaling pathway;ko00010//Glycolysis / Gluconeogenesis;ko05230//Central carbon metabolism in cancer;ko00500//Starch and sucrose metabolism;ko00052//Galactose metabolism;ko04930//Type II diabetes mellitus;ko00051//Fructo…	K00844;K00844;K00844;K00844;K00844;K00844;K00844;K00844;K00844;K00844;K00844;K00844;K00844;K00844	-	GO:0004396//hexokinase activity;GO:0005524//ATP binding;GO:0005536//glucose binding	GO:0001678//cellular glucose homeostasis;GO:0006096//glycolytic process;GO:0019318//hexose metabolic process
MSTRG.12251.1	Sfur002233	0.957228974	0.002704919	HK1	Hexokinase	Metabolism;Metabolism;Human Diseases;Organismal Systems;Metabolism;Environmental Information Processing;Metabolism;Human Diseases;Metabolism;Metabolism;Human Diseases;Metabolism;Organismal Systems;Metabolism	Global and overview maps;Global and overview maps;Infectious diseases;Endocrine system;Carbohydrate metabolism;Signal transduction;Carbohydrate metabolism;Cancers;Carbohydrate metabolism;Carbohydrate metabolism;Endocrine and metabolic diseases;Carbohydrate metabolism;Digestive system;Biosynthesis of other secondary metabolites	ko01100//Metabolic pathways;ko01200//Carbon metabolism;ko05131//Shigellosis;ko04910//Insulin signaling pathway;ko00520//Amino sugar and nucleotide sugar metabolism;ko04066//HIF-1 signaling pathway;ko00010//Glycolysis / Gluconeogenesis;ko05230//Central carbon metabolism in cancer;ko00500//Starch and sucrose metabolism;ko00052//Galactose metabolism;ko04930//Type II diabetes mellitus;ko00051//Fructo…	K00844;K00844;K00844;K00844;K00844;K00844;K00844;K00844;K00844;K00844;K00844;K00844;K00844;K00844	-	GO:0004396//hexokinase activity;GO:0005524//ATP binding;GO:0005536//glucose binding	GO:0001678//cellular glucose homeostasis;GO:0006096//glycolytic process;GO:0019318//hexose metabolic process
MSTRG.21259.5	Sfur002233	-0.952537838	0.003325527	HK1	Hexokinase	Metabolism;Metabolism;Human Diseases;Organismal Systems;Metabolism;Environmental Information Processing;Metabolism;Human Diseases;Metabolism;Metabolism;Human Diseases;Metabolism;Organismal Systems;Metabolism	Global and overview maps;Global and overview maps;Infectious diseases;Endocrine system;Carbohydrate metabolism;Signal transduction;Carbohydrate metabolism;Cancers;Carbohydrate metabolism;Carbohydrate metabolism;Endocrine and metabolic diseases;Carbohydrate metabolism;Digestive system;Biosynthesis of other secondary metabolites	ko01100//Metabolic pathways;ko01200//Carbon metabolism;ko05131//Shigellosis;ko04910//Insulin signaling pathway;ko00520//Amino sugar and nucleotide sugar metabolism;ko04066//HIF-1 signaling pathway;ko00010//Glycolysis / Gluconeogenesis;ko05230//Central carbon metabolism in cancer;ko00500//Starch and sucrose metabolism;ko00052//Galactose metabolism;ko04930//Type II diabetes mellitus;ko00051//Fructo…	K00844;K00844;K00844;K00844;K00844;K00844;K00844;K00844;K00844;K00844;K00844;K00844;K00844;K00844	-	GO:0004396//hexokinase activity;GO:0005524//ATP binding;GO:0005536//glucose binding	GO:0001678//cellular glucose homeostasis;GO:0006096//glycolytic process;GO:0019318//hexose metabolic process
MSTRG.17005.1	Sfur002233	0.955196211	0.0029661	HK1	Hexokinase	Metabolism;Metabolism;Human Diseases;Organismal Systems;Metabolism;Environmental Information Processing;Metabolism;Human Diseases;Metabolism;Metabolism;Human Diseases;Metabolism;Organismal Systems;Metabolism	Global and overview maps;Global and overview maps;Infectious diseases;Endocrine system;Carbohydrate metabolism;Signal transduction;Carbohydrate metabolism;Cancers;Carbohydrate metabolism;Carbohydrate metabolism;Endocrine and metabolic diseases;Carbohydrate metabolism;Digestive system;Biosynthesis of other secondary metabolites	ko01100//Metabolic pathways;ko01200//Carbon metabolism;ko05131//Shigellosis;ko04910//Insulin signaling pathway;ko00520//Amino sugar and nucleotide sugar metabolism;ko04066//HIF-1 signaling pathway;ko00010//Glycolysis / Gluconeogenesis;ko05230//Central carbon metabolism in cancer;ko00500//Starch and sucrose metabolism;ko00052//Galactose metabolism;ko04930//Type II diabetes mellitus;ko00051//Fructo…	K00844;K00844;K00844;K00844;K00844;K00844;K00844;K00844;K00844;K00844;K00844;K00844;K00844;K00844	-	GO:0004396//hexokinase activity;GO:0005524//ATP binding;GO:0005536//glucose binding	GO:0001678//cellular glucose homeostasis;GO:0006096//glycolytic process;GO:0019318//hexose metabolic process
MSTRG.1725.4	Sfur002233	-0.987037027	0.000250969	HK1	Hexokinase	Metabolism;Metabolism;Human Diseases;Organismal Systems;Metabolism;Environmental Information Processing;Metabolism;Human Diseases;Metabolism;Metabolism;Human Diseases;Metabolism;Organismal Systems;Metabolism	Global and overview maps;Global and overview maps;Infectious diseases;Endocrine system;Carbohydrate metabolism;Signal transduction;Carbohydrate metabolism;Cancers;Carbohydrate metabolism;Carbohydrate metabolism;Endocrine and metabolic diseases;Carbohydrate metabolism;Digestive system;Biosynthesis of other secondary metabolites	ko01100//Metabolic pathways;ko01200//Carbon metabolism;ko05131//Shigellosis;ko04910//Insulin signaling pathway;ko00520//Amino sugar and nucleotide sugar metabolism;ko04066//HIF-1 signaling pathway;ko00010//Glycolysis / Gluconeogenesis;ko05230//Central carbon metabolism in cancer;ko00500//Starch and sucrose metabolism;ko00052//Galactose metabolism;ko04930//Type II diabetes mellitus;ko00051//Fructo…	K00844;K00844;K00844;K00844;K00844;K00844;K00844;K00844;K00844;K00844;K00844;K00844;K00844;K00844	-	GO:0004396//hexokinase activity;GO:0005524//ATP binding;GO:0005536//glucose binding	GO:0001678//cellular glucose homeostasis;GO:0006096//glycolytic process;GO:0019318//hexose metabolic process
MSTRG.24835.1	Sfur002233	-0.969346979	0.001395011	HK1	Hexokinase	Metabolism;Metabolism;Human Diseases;Organismal Systems;Metabolism;Environmental Information Processing;Metabolism;Human Diseases;Metabolism;Metabolism;Human Diseases;Metabolism;Organismal Systems;Metabolism	Global and overview maps;Global and overview maps;Infectious diseases;Endocrine system;Carbohydrate metabolism;Signal transduction;Carbohydrate metabolism;Cancers;Carbohydrate metabolism;Carbohydrate metabolism;Endocrine and metabolic diseases;Carbohydrate metabolism;Digestive system;Biosynthesis of other secondary metabolites	ko01100//Metabolic pathways;ko01200//Carbon metabolism;ko05131//Shigellosis;ko04910//Insulin signaling pathway;ko00520//Amino sugar and nucleotide sugar metabolism;ko04066//HIF-1 signaling pathway;ko00010//Glycolysis / Gluconeogenesis;ko05230//Central carbon metabolism in cancer;ko00500//Starch and sucrose metabolism;ko00052//Galactose metabolism;ko04930//Type II diabetes mellitus;ko00051//Fructo…	K00844;K00844;K00844;K00844;K00844;K00844;K00844;K00844;K00844;K00844;K00844;K00844;K00844;K00844	-	GO:0004396//hexokinase activity;GO:0005524//ATP binding;GO:0005536//glucose binding	GO:0001678//cellular glucose homeostasis;GO:0006096//glycolytic process;GO:0019318//hexose metabolic process
MSTRG.24994.6	Sfur002233	-0.976570816	0.00081696	HK1	Hexokinase	Metabolism;Metabolism;Human Diseases;Organismal Systems;Metabolism;Environmental Information Processing;Metabolism;Human Diseases;Metabolism;Metabolism;Human Diseases;Metabolism;Organismal Systems;Metabolism	Global and overview maps;Global and overview maps;Infectious diseases;Endocrine system;Carbohydrate metabolism;Signal transduction;Carbohydrate metabolism;Cancers;Carbohydrate metabolism;Carbohydrate metabolism;Endocrine and metabolic diseases;Carbohydrate metabolism;Digestive system;Biosynthesis of other secondary metabolites	ko01100//Metabolic pathways;ko01200//Carbon metabolism;ko05131//Shigellosis;ko04910//Insulin signaling pathway;ko00520//Amino sugar and nucleotide sugar metabolism;ko04066//HIF-1 signaling pathway;ko00010//Glycolysis / Gluconeogenesis;ko05230//Central carbon metabolism in cancer;ko00500//Starch and sucrose metabolism;ko00052//Galactose metabolism;ko04930//Type II diabetes mellitus;ko00051//Fructo…	K00844;K00844;K00844;K00844;K00844;K00844;K00844;K00844;K00844;K00844;K00844;K00844;K00844;K00844	-	GO:0004396//hexokinase activity;GO:0005524//ATP binding;GO:0005536//glucose binding	GO:0001678//cellular glucose homeostasis;GO:0006096//glycolytic process;GO:0019318//hexose metabolic process
MSTRG.5612.1	Sfur002233	-0.974543303	0.000963817	HK1	Hexokinase	Metabolism;Metabolism;Human Diseases;Organismal Systems;Metabolism;Environmental Information Processing;Metabolism;Human Diseases;Metabolism;Metabolism;Human Diseases;Metabolism;Organismal Systems;Metabolism	Global and overview maps;Global and overview maps;Infectious diseases;Endocrine system;Carbohydrate metabolism;Signal transduction;Carbohydrate metabolism;Cancers;Carbohydrate metabolism;Carbohydrate metabolism;Endocrine and metabolic diseases;Carbohydrate metabolism;Digestive system;Biosynthesis of other secondary metabolites	ko01100//Metabolic pathways;ko01200//Carbon metabolism;ko05131//Shigellosis;ko04910//Insulin signaling pathway;ko00520//Amino sugar and nucleotide sugar metabolism;ko04066//HIF-1 signaling pathway;ko00010//Glycolysis / Gluconeogenesis;ko05230//Central carbon metabolism in cancer;ko00500//Starch and sucrose metabolism;ko00052//Galactose metabolism;ko04930//Type II diabetes mellitus;ko00051//Fructo…	K00844;K00844;K00844;K00844;K00844;K00844;K00844;K00844;K00844;K00844;K00844;K00844;K00844;K00844	-	GO:0004396//hexokinase activity;GO:0005524//ATP binding;GO:0005536//glucose binding	GO:0001678//cellular glucose homeostasis;GO:0006096//glycolytic process;GO:0019318//hexose metabolic process
MSTRG.21853.1	Sfur002233	-0.983288183	0.000416594	HK1	Hexokinase	Metabolism;Metabolism;Human Diseases;Organismal Systems;Metabolism;Environmental Information Processing;Metabolism;Human Diseases;Metabolism;Metabolism;Human Diseases;Metabolism;Organismal Systems;Metabolism	Global and overview maps;Global and overview maps;Infectious diseases;Endocrine system;Carbohydrate metabolism;Signal transduction;Carbohydrate metabolism;Cancers;Carbohydrate metabolism;Carbohydrate metabolism;Endocrine and metabolic diseases;Carbohydrate metabolism;Digestive system;Biosynthesis of other secondary metabolites	ko01100//Metabolic pathways;ko01200//Carbon metabolism;ko05131//Shigellosis;ko04910//Insulin signaling pathway;ko00520//Amino sugar and nucleotide sugar metabolism;ko04066//HIF-1 signaling pathway;ko00010//Glycolysis / Gluconeogenesis;ko05230//Central carbon metabolism in cancer;ko00500//Starch and sucrose metabolism;ko00052//Galactose metabolism;ko04930//Type II diabetes mellitus;ko00051//Fructo…	K00844;K00844;K00844;K00844;K00844;K00844;K00844;K00844;K00844;K00844;K00844;K00844;K00844;K00844	-	GO:0004396//hexokinase activity;GO:0005524//ATP binding;GO:0005536//glucose binding	GO:0001678//cellular glucose homeostasis;GO:0006096//glycolytic process;GO:0019318//hexose metabolic process
MSTRG.28253.4	Sfur002233	-0.97264586	0.00111214	HK1	Hexokinase	Metabolism;Metabolism;Human Diseases;Organismal Systems;Metabolism;Environmental Information Processing;Metabolism;Human Diseases;Metabolism;Metabolism;Human Diseases;Metabolism;Organismal Systems;Metabolism	Global and overview maps;Global and overview maps;Infectious diseases;Endocrine system;Carbohydrate metabolism;Signal transduction;Carbohydrate metabolism;Cancers;Carbohydrate metabolism;Carbohydrate metabolism;Endocrine and metabolic diseases;Carbohydrate metabolism;Digestive system;Biosynthesis of other secondary metabolites	ko01100//Metabolic pathways;ko01200//Carbon metabolism;ko05131//Shigellosis;ko04910//Insulin signaling pathway;ko00520//Amino sugar and nucleotide sugar metabolism;ko04066//HIF-1 signaling pathway;ko00010//Glycolysis / Gluconeogenesis;ko05230//Central carbon metabolism in cancer;ko00500//Starch and sucrose metabolism;ko00052//Galactose metabolism;ko04930//Type II diabetes mellitus;ko00051//Fructo…	K00844;K00844;K00844;K00844;K00844;K00844;K00844;K00844;K00844;K00844;K00844;K00844;K00844;K00844	-	GO:0004396//hexokinase activity;GO:0005524//ATP binding;GO:0005536//glucose binding	GO:0001678//cellular glucose homeostasis;GO:0006096//glycolytic process;GO:0019318//hexose metabolic process
MSTRG.39779.1	Sfur002233	-0.972402377	0.001131934	HK1	Hexokinase	Metabolism;Metabolism;Human Diseases;Organismal Systems;Metabolism;Environmental Information Processing;Metabolism;Human Diseases;Metabolism;Metabolism;Human Diseases;Metabolism;Organismal Systems;Metabolism	Global and overview maps;Global and overview maps;Infectious diseases;Endocrine system;Carbohydrate metabolism;Signal transduction;Carbohydrate metabolism;Cancers;Carbohydrate metabolism;Carbohydrate metabolism;Endocrine and metabolic diseases;Carbohydrate metabolism;Digestive system;Biosynthesis of other secondary metabolites	ko01100//Metabolic pathways;ko01200//Carbon metabolism;ko05131//Shigellosis;ko04910//Insulin signaling pathway;ko00520//Amino sugar and nucleotide sugar metabolism;ko04066//HIF-1 signaling pathway;ko00010//Glycolysis / Gluconeogenesis;ko05230//Central carbon metabolism in cancer;ko00500//Starch and sucrose metabolism;ko00052//Galactose metabolism;ko04930//Type II diabetes mellitus;ko00051//Fructo…	K00844;K00844;K00844;K00844;K00844;K00844;K00844;K00844;K00844;K00844;K00844;K00844;K00844;K00844	-	GO:0004396//hexokinase activity;GO:0005524//ATP binding;GO:0005536//glucose binding	GO:0001678//cellular glucose homeostasis;GO:0006096//glycolytic process;GO:0019318//hexose metabolic process
MSTRG.39271.1	Sfur002233	-0.981661715	0.000501356	HK1	Hexokinase	Metabolism;Metabolism;Human Diseases;Organismal Systems;Metabolism;Environmental Information Processing;Metabolism;Human Diseases;Metabolism;Metabolism;Human Diseases;Metabolism;Organismal Systems;Metabolism	Global and overview maps;Global and overview maps;Infectious diseases;Endocrine system;Carbohydrate metabolism;Signal transduction;Carbohydrate metabolism;Cancers;Carbohydrate metabolism;Carbohydrate metabolism;Endocrine and metabolic diseases;Carbohydrate metabolism;Digestive system;Biosynthesis of other secondary metabolites	ko01100//Metabolic pathways;ko01200//Carbon metabolism;ko05131//Shigellosis;ko04910//Insulin signaling pathway;ko00520//Amino sugar and nucleotide sugar metabolism;ko04066//HIF-1 signaling pathway;ko00010//Glycolysis / Gluconeogenesis;ko05230//Central carbon metabolism in cancer;ko00500//Starch and sucrose metabolism;ko00052//Galactose metabolism;ko04930//Type II diabetes mellitus;ko00051//Fructo…	K00844;K00844;K00844;K00844;K00844;K00844;K00844;K00844;K00844;K00844;K00844;K00844;K00844;K00844	-	GO:0004396//hexokinase activity;GO:0005524//ATP binding;GO:0005536//glucose binding	GO:0001678//cellular glucose homeostasis;GO:0006096//glycolytic process;GO:0019318//hexose metabolic process
MSTRG.39215.1	Sfur002233	-0.961807241	0.002160175	HK1	Hexokinase	Metabolism;Metabolism;Human Diseases;Organismal Systems;Metabolism;Environmental Information Processing;Metabolism;Human Diseases;Metabolism;Metabolism;Human Diseases;Metabolism;Organismal Systems;Metabolism	Global and overview maps;Global and overview maps;Infectious diseases;Endocrine system;Carbohydrate metabolism;Signal transduction;Carbohydrate metabolism;Cancers;Carbohydrate metabolism;Carbohydrate metabolism;Endocrine and metabolic diseases;Carbohydrate metabolism;Digestive system;Biosynthesis of other secondary metabolites	ko01100//Metabolic pathways;ko01200//Carbon metabolism;ko05131//Shigellosis;ko04910//Insulin signaling pathway;ko00520//Amino sugar and nucleotide sugar metabolism;ko04066//HIF-1 signaling pathway;ko00010//Glycolysis / Gluconeogenesis;ko05230//Central carbon metabolism in cancer;ko00500//Starch and sucrose metabolism;ko00052//Galactose metabolism;ko04930//Type II diabetes mellitus;ko00051//Fructo…	K00844;K00844;K00844;K00844;K00844;K00844;K00844;K00844;K00844;K00844;K00844;K00844;K00844;K00844	-	GO:0004396//hexokinase activity;GO:0005524//ATP binding;GO:0005536//glucose binding	GO:0001678//cellular glucose homeostasis;GO:0006096//glycolytic process;GO:0019318//hexose metabolic process
MSTRG.11263.1	Sfur002233	-0.959793255	0.002392375	HK1	Hexokinase	Metabolism;Metabolism;Human Diseases;Organismal Systems;Metabolism;Environmental Information Processing;Metabolism;Human Diseases;Metabolism;Metabolism;Human Diseases;Metabolism;Organismal Systems;Metabolism	Global and overview maps;Global and overview maps;Infectious diseases;Endocrine system;Carbohydrate metabolism;Signal transduction;Carbohydrate metabolism;Cancers;Carbohydrate metabolism;Carbohydrate metabolism;Endocrine and metabolic diseases;Carbohydrate metabolism;Digestive system;Biosynthesis of other secondary metabolites	ko01100//Metabolic pathways;ko01200//Carbon metabolism;ko05131//Shigellosis;ko04910//Insulin signaling pathway;ko00520//Amino sugar and nucleotide sugar metabolism;ko04066//HIF-1 signaling pathway;ko00010//Glycolysis / Gluconeogenesis;ko05230//Central carbon metabolism in cancer;ko00500//Starch and sucrose metabolism;ko00052//Galactose metabolism;ko04930//Type II diabetes mellitus;ko00051//Fructo…	K00844;K00844;K00844;K00844;K00844;K00844;K00844;K00844;K00844;K00844;K00844;K00844;K00844;K00844	-	GO:0004396//hexokinase activity;GO:0005524//ATP binding;GO:0005536//glucose binding	GO:0001678//cellular glucose homeostasis;GO:0006096//glycolytic process;GO:0019318//hexose metabolic process
MSTRG.25057.1	Sfur002233	-0.982347329	0.000464675	HK1	Hexokinase	Metabolism;Metabolism;Human Diseases;Organismal Systems;Metabolism;Environmental Information Processing;Metabolism;Human Diseases;Metabolism;Metabolism;Human Diseases;Metabolism;Organismal Systems;Metabolism	Global and overview maps;Global and overview maps;Infectious diseases;Endocrine system;Carbohydrate metabolism;Signal transduction;Carbohydrate metabolism;Cancers;Carbohydrate metabolism;Carbohydrate metabolism;Endocrine and metabolic diseases;Carbohydrate metabolism;Digestive system;Biosynthesis of other secondary metabolites	ko01100//Metabolic pathways;ko01200//Carbon metabolism;ko05131//Shigellosis;ko04910//Insulin signaling pathway;ko00520//Amino sugar and nucleotide sugar metabolism;ko04066//HIF-1 signaling pathway;ko00010//Glycolysis / Gluconeogenesis;ko05230//Central carbon metabolism in cancer;ko00500//Starch and sucrose metabolism;ko00052//Galactose metabolism;ko04930//Type II diabetes mellitus;ko00051//Fructo…	K00844;K00844;K00844;K00844;K00844;K00844;K00844;K00844;K00844;K00844;K00844;K00844;K00844;K00844	-	GO:0004396//hexokinase activity;GO:0005524//ATP binding;GO:0005536//glucose binding	GO:0001678//cellular glucose homeostasis;GO:0006096//glycolytic process;GO:0019318//hexose metabolic process
MSTRG.34732.1	Sfur002233	-0.975306333	0.000907137	HK1	Hexokinase	Metabolism;Metabolism;Human Diseases;Organismal Systems;Metabolism;Environmental Information Processing;Metabolism;Human Diseases;Metabolism;Metabolism;Human Diseases;Metabolism;Organismal Systems;Metabolism	Global and overview maps;Global and overview maps;Infectious diseases;Endocrine system;Carbohydrate metabolism;Signal transduction;Carbohydrate metabolism;Cancers;Carbohydrate metabolism;Carbohydrate metabolism;Endocrine and metabolic diseases;Carbohydrate metabolism;Digestive system;Biosynthesis of other secondary metabolites	ko01100//Metabolic pathways;ko01200//Carbon metabolism;ko05131//Shigellosis;ko04910//Insulin signaling pathway;ko00520//Amino sugar and nucleotide sugar metabolism;ko04066//HIF-1 signaling pathway;ko00010//Glycolysis / Gluconeogenesis;ko05230//Central carbon metabolism in cancer;ko00500//Starch and sucrose metabolism;ko00052//Galactose metabolism;ko04930//Type II diabetes mellitus;ko00051//Fructo…	K00844;K00844;K00844;K00844;K00844;K00844;K00844;K00844;K00844;K00844;K00844;K00844;K00844;K00844	-	GO:0004396//hexokinase activity;GO:0005524//ATP binding;GO:0005536//glucose binding	GO:0001678//cellular glucose homeostasis;GO:0006096//glycolytic process;GO:0019318//hexose metabolic process
MSTRG.12600.5	Sfur002233	-0.972215036	0.001147281	HK1	Hexokinase	Metabolism;Metabolism;Human Diseases;Organismal Systems;Metabolism;Environmental Information Processing;Metabolism;Human Diseases;Metabolism;Metabolism;Human Diseases;Metabolism;Organismal Systems;Metabolism	Global and overview maps;Global and overview maps;Infectious diseases;Endocrine system;Carbohydrate metabolism;Signal transduction;Carbohydrate metabolism;Cancers;Carbohydrate metabolism;Carbohydrate metabolism;Endocrine and metabolic diseases;Carbohydrate metabolism;Digestive system;Biosynthesis of other secondary metabolites	ko01100//Metabolic pathways;ko01200//Carbon metabolism;ko05131//Shigellosis;ko04910//Insulin signaling pathway;ko00520//Amino sugar and nucleotide sugar metabolism;ko04066//HIF-1 signaling pathway;ko00010//Glycolysis / Gluconeogenesis;ko05230//Central carbon metabolism in cancer;ko00500//Starch and sucrose metabolism;ko00052//Galactose metabolism;ko04930//Type II diabetes mellitus;ko00051//Fructo…	K00844;K00844;K00844;K00844;K00844;K00844;K00844;K00844;K00844;K00844;K00844;K00844;K00844;K00844	-	GO:0004396//hexokinase activity;GO:0005524//ATP binding;GO:0005536//glucose binding	GO:0001678//cellular glucose homeostasis;GO:0006096//glycolytic process;GO:0019318//hexose metabolic process
MSTRG.21077.2	Sfur002233	-0.954711914	0.003030073	HK1	Hexokinase	Metabolism;Metabolism;Human Diseases;Organismal Systems;Metabolism;Environmental Information Processing;Metabolism;Human Diseases;Metabolism;Metabolism;Human Diseases;Metabolism;Organismal Systems;Metabolism	Global and overview maps;Global and overview maps;Infectious diseases;Endocrine system;Carbohydrate metabolism;Signal transduction;Carbohydrate metabolism;Cancers;Carbohydrate metabolism;Carbohydrate metabolism;Endocrine and metabolic diseases;Carbohydrate metabolism;Digestive system;Biosynthesis of other secondary metabolites	ko01100//Metabolic pathways;ko01200//Carbon metabolism;ko05131//Shigellosis;ko04910//Insulin signaling pathway;ko00520//Amino sugar and nucleotide sugar metabolism;ko04066//HIF-1 signaling pathway;ko00010//Glycolysis / Gluconeogenesis;ko05230//Central carbon metabolism in cancer;ko00500//Starch and sucrose metabolism;ko00052//Galactose metabolism;ko04930//Type II diabetes mellitus;ko00051//Fructo…	K00844;K00844;K00844;K00844;K00844;K00844;K00844;K00844;K00844;K00844;K00844;K00844;K00844;K00844	-	GO:0004396//hexokinase activity;GO:0005524//ATP binding;GO:0005536//glucose binding	GO:0001678//cellular glucose homeostasis;GO:0006096//glycolytic process;GO:0019318//hexose metabolic process
MSTRG.39018.1	Sfur002233	-0.978103073	0.000713964	HK1	Hexokinase	Metabolism;Metabolism;Human Diseases;Organismal Systems;Metabolism;Environmental Information Processing;Metabolism;Human Diseases;Metabolism;Metabolism;Human Diseases;Metabolism;Organismal Systems;Metabolism	Global and overview maps;Global and overview maps;Infectious diseases;Endocrine system;Carbohydrate metabolism;Signal transduction;Carbohydrate metabolism;Cancers;Carbohydrate metabolism;Carbohydrate metabolism;Endocrine and metabolic diseases;Carbohydrate metabolism;Digestive system;Biosynthesis of other secondary metabolites	ko01100//Metabolic pathways;ko01200//Carbon metabolism;ko05131//Shigellosis;ko04910//Insulin signaling pathway;ko00520//Amino sugar and nucleotide sugar metabolism;ko04066//HIF-1 signaling pathway;ko00010//Glycolysis / Gluconeogenesis;ko05230//Central carbon metabolism in cancer;ko00500//Starch and sucrose metabolism;ko00052//Galactose metabolism;ko04930//Type II diabetes mellitus;ko00051//Fructo…	K00844;K00844;K00844;K00844;K00844;K00844;K00844;K00844;K00844;K00844;K00844;K00844;K00844;K00844	-	GO:0004396//hexokinase activity;GO:0005524//ATP binding;GO:0005536//glucose binding	GO:0001678//cellular glucose homeostasis;GO:0006096//glycolytic process;GO:0019318//hexose metabolic process
MSTRG.27249.1	Sfur002233	-0.967204816	0.00159565	HK1	Hexokinase	Metabolism;Metabolism;Human Diseases;Organismal Systems;Metabolism;Environmental Information Processing;Metabolism;Human Diseases;Metabolism;Metabolism;Human Diseases;Metabolism;Organismal Systems;Metabolism	Global and overview maps;Global and overview maps;Infectious diseases;Endocrine system;Carbohydrate metabolism;Signal transduction;Carbohydrate metabolism;Cancers;Carbohydrate metabolism;Carbohydrate metabolism;Endocrine and metabolic diseases;Carbohydrate metabolism;Digestive system;Biosynthesis of other secondary metabolites	ko01100//Metabolic pathways;ko01200//Carbon metabolism;ko05131//Shigellosis;ko04910//Insulin signaling pathway;ko00520//Amino sugar and nucleotide sugar metabolism;ko04066//HIF-1 signaling pathway;ko00010//Glycolysis / Gluconeogenesis;ko05230//Central carbon metabolism in cancer;ko00500//Starch and sucrose metabolism;ko00052//Galactose metabolism;ko04930//Type II diabetes mellitus;ko00051//Fructo…	K00844;K00844;K00844;K00844;K00844;K00844;K00844;K00844;K00844;K00844;K00844;K00844;K00844;K00844	-	GO:0004396//hexokinase activity;GO:0005524//ATP binding;GO:0005536//glucose binding	GO:0001678//cellular glucose homeostasis;GO:0006096//glycolytic process;GO:0019318//hexose metabolic process
MSTRG.38382.2	Sfur002233	-0.980411338	0.000571815	HK1	Hexokinase	Metabolism;Metabolism;Human Diseases;Organismal Systems;Metabolism;Environmental Information Processing;Metabolism;Human Diseases;Metabolism;Metabolism;Human Diseases;Metabolism;Organismal Systems;Metabolism	Global and overview maps;Global and overview maps;Infectious diseases;Endocrine system;Carbohydrate metabolism;Signal transduction;Carbohydrate metabolism;Cancers;Carbohydrate metabolism;Carbohydrate metabolism;Endocrine and metabolic diseases;Carbohydrate metabolism;Digestive system;Biosynthesis of other secondary metabolites	ko01100//Metabolic pathways;ko01200//Carbon metabolism;ko05131//Shigellosis;ko04910//Insulin signaling pathway;ko00520//Amino sugar and nucleotide sugar metabolism;ko04066//HIF-1 signaling pathway;ko00010//Glycolysis / Gluconeogenesis;ko05230//Central carbon metabolism in cancer;ko00500//Starch and sucrose metabolism;ko00052//Galactose metabolism;ko04930//Type II diabetes mellitus;ko00051//Fructo…	K00844;K00844;K00844;K00844;K00844;K00844;K00844;K00844;K00844;K00844;K00844;K00844;K00844;K00844	-	GO:0004396//hexokinase activity;GO:0005524//ATP binding;GO:0005536//glucose binding	GO:0001678//cellular glucose homeostasis;GO:0006096//glycolytic process;GO:0019318//hexose metabolic process
MSTRG.15631.1	Sfur002233	0.980782301	0.000550431	HK1	Hexokinase	Metabolism;Metabolism;Human Diseases;Organismal Systems;Metabolism;Environmental Information Processing;Metabolism;Human Diseases;Metabolism;Metabolism;Human Diseases;Metabolism;Organismal Systems;Metabolism	Global and overview maps;Global and overview maps;Infectious diseases;Endocrine system;Carbohydrate metabolism;Signal transduction;Carbohydrate metabolism;Cancers;Carbohydrate metabolism;Carbohydrate metabolism;Endocrine and metabolic diseases;Carbohydrate metabolism;Digestive system;Biosynthesis of other secondary metabolites	ko01100//Metabolic pathways;ko01200//Carbon metabolism;ko05131//Shigellosis;ko04910//Insulin signaling pathway;ko00520//Amino sugar and nucleotide sugar metabolism;ko04066//HIF-1 signaling pathway;ko00010//Glycolysis / Gluconeogenesis;ko05230//Central carbon metabolism in cancer;ko00500//Starch and sucrose metabolism;ko00052//Galactose metabolism;ko04930//Type II diabetes mellitus;ko00051//Fructo…	K00844;K00844;K00844;K00844;K00844;K00844;K00844;K00844;K00844;K00844;K00844;K00844;K00844;K00844	-	GO:0004396//hexokinase activity;GO:0005524//ATP binding;GO:0005536//glucose binding	GO:0001678//cellular glucose homeostasis;GO:0006096//glycolytic process;GO:0019318//hexose metabolic process
MSTRG.28387.1	Sfur002233	-0.970595946	0.001284186	HK1	Hexokinase	Metabolism;Metabolism;Human Diseases;Organismal Systems;Metabolism;Environmental Information Processing;Metabolism;Human Diseases;Metabolism;Metabolism;Human Diseases;Metabolism;Organismal Systems;Metabolism	Global and overview maps;Global and overview maps;Infectious diseases;Endocrine system;Carbohydrate metabolism;Signal transduction;Carbohydrate metabolism;Cancers;Carbohydrate metabolism;Carbohydrate metabolism;Endocrine and metabolic diseases;Carbohydrate metabolism;Digestive system;Biosynthesis of other secondary metabolites	ko01100//Metabolic pathways;ko01200//Carbon metabolism;ko05131//Shigellosis;ko04910//Insulin signaling pathway;ko00520//Amino sugar and nucleotide sugar metabolism;ko04066//HIF-1 signaling pathway;ko00010//Glycolysis / Gluconeogenesis;ko05230//Central carbon metabolism in cancer;ko00500//Starch and sucrose metabolism;ko00052//Galactose metabolism;ko04930//Type II diabetes mellitus;ko00051//Fructo…	K00844;K00844;K00844;K00844;K00844;K00844;K00844;K00844;K00844;K00844;K00844;K00844;K00844;K00844	-	GO:0004396//hexokinase activity;GO:0005524//ATP binding;GO:0005536//glucose binding	GO:0001678//cellular glucose homeostasis;GO:0006096//glycolytic process;GO:0019318//hexose metabolic process
MSTRG.23616.1	Sfur002233	-0.950667493	0.003590514	HK1	Hexokinase	Metabolism;Metabolism;Human Diseases;Organismal Systems;Metabolism;Environmental Information Processing;Metabolism;Human Diseases;Metabolism;Metabolism;Human Diseases;Metabolism;Organismal Systems;Metabolism	Global and overview maps;Global and overview maps;Infectious diseases;Endocrine system;Carbohydrate metabolism;Signal transduction;Carbohydrate metabolism;Cancers;Carbohydrate metabolism;Carbohydrate metabolism;Endocrine and metabolic diseases;Carbohydrate metabolism;Digestive system;Biosynthesis of other secondary metabolites	ko01100//Metabolic pathways;ko01200//Carbon metabolism;ko05131//Shigellosis;ko04910//Insulin signaling pathway;ko00520//Amino sugar and nucleotide sugar metabolism;ko04066//HIF-1 signaling pathway;ko00010//Glycolysis / Gluconeogenesis;ko05230//Central carbon metabolism in cancer;ko00500//Starch and sucrose metabolism;ko00052//Galactose metabolism;ko04930//Type II diabetes mellitus;ko00051//Fructo…	K00844;K00844;K00844;K00844;K00844;K00844;K00844;K00844;K00844;K00844;K00844;K00844;K00844;K00844	-	GO:0004396//hexokinase activity;GO:0005524//ATP binding;GO:0005536//glucose binding	GO:0001678//cellular glucose homeostasis;GO:0006096//glycolytic process;GO:0019318//hexose metabolic process
MSTRG.36195.1	Sfur002233	0.966155123	0.001698829	HK1	Hexokinase	Metabolism;Metabolism;Human Diseases;Organismal Systems;Metabolism;Environmental Information Processing;Metabolism;Human Diseases;Metabolism;Metabolism;Human Diseases;Metabolism;Organismal Systems;Metabolism	Global and overview maps;Global and overview maps;Infectious diseases;Endocrine system;Carbohydrate metabolism;Signal transduction;Carbohydrate metabolism;Cancers;Carbohydrate metabolism;Carbohydrate metabolism;Endocrine and metabolic diseases;Carbohydrate metabolism;Digestive system;Biosynthesis of other secondary metabolites	ko01100//Metabolic pathways;ko01200//Carbon metabolism;ko05131//Shigellosis;ko04910//Insulin signaling pathway;ko00520//Amino sugar and nucleotide sugar metabolism;ko04066//HIF-1 signaling pathway;ko00010//Glycolysis / Gluconeogenesis;ko05230//Central carbon metabolism in cancer;ko00500//Starch and sucrose metabolism;ko00052//Galactose metabolism;ko04930//Type II diabetes mellitus;ko00051//Fructo…	K00844;K00844;K00844;K00844;K00844;K00844;K00844;K00844;K00844;K00844;K00844;K00844;K00844;K00844	-	GO:0004396//hexokinase activity;GO:0005524//ATP binding;GO:0005536//glucose binding	GO:0001678//cellular glucose homeostasis;GO:0006096//glycolytic process;GO:0019318//hexose metabolic process
MSTRG.31275.1	Sfur002233	0.974322162	0.000980562	HK1	Hexokinase	Metabolism;Metabolism;Human Diseases;Organismal Systems;Metabolism;Environmental Information Processing;Metabolism;Human Diseases;Metabolism;Metabolism;Human Diseases;Metabolism;Organismal Systems;Metabolism	Global and overview maps;Global and overview maps;Infectious diseases;Endocrine system;Carbohydrate metabolism;Signal transduction;Carbohydrate metabolism;Cancers;Carbohydrate metabolism;Carbohydrate metabolism;Endocrine and metabolic diseases;Carbohydrate metabolism;Digestive system;Biosynthesis of other secondary metabolites	ko01100//Metabolic pathways;ko01200//Carbon metabolism;ko05131//Shigellosis;ko04910//Insulin signaling pathway;ko00520//Amino sugar and nucleotide sugar metabolism;ko04066//HIF-1 signaling pathway;ko00010//Glycolysis / Gluconeogenesis;ko05230//Central carbon metabolism in cancer;ko00500//Starch and sucrose metabolism;ko00052//Galactose metabolism;ko04930//Type II diabetes mellitus;ko00051//Fructo…	K00844;K00844;K00844;K00844;K00844;K00844;K00844;K00844;K00844;K00844;K00844;K00844;K00844;K00844	-	GO:0004396//hexokinase activity;GO:0005524//ATP binding;GO:0005536//glucose binding	GO:0001678//cellular glucose homeostasis;GO:0006096//glycolytic process;GO:0019318//hexose metabolic process
MSTRG.39618.1	Sfur002233	-0.950368255	0.003633836	HK1	Hexokinase	Metabolism;Metabolism;Human Diseases;Organismal Systems;Metabolism;Environmental Information Processing;Metabolism;Human Diseases;Metabolism;Metabolism;Human Diseases;Metabolism;Organismal Systems;Metabolism	Global and overview maps;Global and overview maps;Infectious diseases;Endocrine system;Carbohydrate metabolism;Signal transduction;Carbohydrate metabolism;Cancers;Carbohydrate metabolism;Carbohydrate metabolism;Endocrine and metabolic diseases;Carbohydrate metabolism;Digestive system;Biosynthesis of other secondary metabolites	ko01100//Metabolic pathways;ko01200//Carbon metabolism;ko05131//Shigellosis;ko04910//Insulin signaling pathway;ko00520//Amino sugar and nucleotide sugar metabolism;ko04066//HIF-1 signaling pathway;ko00010//Glycolysis / Gluconeogenesis;ko05230//Central carbon metabolism in cancer;ko00500//Starch and sucrose metabolism;ko00052//Galactose metabolism;ko04930//Type II diabetes mellitus;ko00051//Fructo…	K00844;K00844;K00844;K00844;K00844;K00844;K00844;K00844;K00844;K00844;K00844;K00844;K00844;K00844	-	GO:0004396//hexokinase activity;GO:0005524//ATP binding;GO:0005536//glucose binding	GO:0001678//cellular glucose homeostasis;GO:0006096//glycolytic process;GO:0019318//hexose metabolic process
MSTRG.24855.2	Sfur002233	-0.987040598	0.000250831	HK1	Hexokinase	Metabolism;Metabolism;Human Diseases;Organismal Systems;Metabolism;Environmental Information Processing;Metabolism;Human Diseases;Metabolism;Metabolism;Human Diseases;Metabolism;Organismal Systems;Metabolism	Global and overview maps;Global and overview maps;Infectious diseases;Endocrine system;Carbohydrate metabolism;Signal transduction;Carbohydrate metabolism;Cancers;Carbohydrate metabolism;Carbohydrate metabolism;Endocrine and metabolic diseases;Carbohydrate metabolism;Digestive system;Biosynthesis of other secondary metabolites	ko01100//Metabolic pathways;ko01200//Carbon metabolism;ko05131//Shigellosis;ko04910//Insulin signaling pathway;ko00520//Amino sugar and nucleotide sugar metabolism;ko04066//HIF-1 signaling pathway;ko00010//Glycolysis / Gluconeogenesis;ko05230//Central carbon metabolism in cancer;ko00500//Starch and sucrose metabolism;ko00052//Galactose metabolism;ko04930//Type II diabetes mellitus;ko00051//Fructo…	K00844;K00844;K00844;K00844;K00844;K00844;K00844;K00844;K00844;K00844;K00844;K00844;K00844;K00844	-	GO:0004396//hexokinase activity;GO:0005524//ATP binding;GO:0005536//glucose binding	GO:0001678//cellular glucose homeostasis;GO:0006096//glycolytic process;GO:0019318//hexose metabolic process
MSTRG.3731.1	Sfur002233	-0.956314313	0.002820973	HK1	Hexokinase	Metabolism;Metabolism;Human Diseases;Organismal Systems;Metabolism;Environmental Information Processing;Metabolism;Human Diseases;Metabolism;Metabolism;Human Diseases;Metabolism;Organismal Systems;Metabolism	Global and overview maps;Global and overview maps;Infectious diseases;Endocrine system;Carbohydrate metabolism;Signal transduction;Carbohydrate metabolism;Cancers;Carbohydrate metabolism;Carbohydrate metabolism;Endocrine and metabolic diseases;Carbohydrate metabolism;Digestive system;Biosynthesis of other secondary metabolites	ko01100//Metabolic pathways;ko01200//Carbon metabolism;ko05131//Shigellosis;ko04910//Insulin signaling pathway;ko00520//Amino sugar and nucleotide sugar metabolism;ko04066//HIF-1 signaling pathway;ko00010//Glycolysis / Gluconeogenesis;ko05230//Central carbon metabolism in cancer;ko00500//Starch and sucrose metabolism;ko00052//Galactose metabolism;ko04930//Type II diabetes mellitus;ko00051//Fructo…	K00844;K00844;K00844;K00844;K00844;K00844;K00844;K00844;K00844;K00844;K00844;K00844;K00844;K00844	-	GO:0004396//hexokinase activity;GO:0005524//ATP binding;GO:0005536//glucose binding	GO:0001678//cellular glucose homeostasis;GO:0006096//glycolytic process;GO:0019318//hexose metabolic process
MSTRG.1527.1	Sfur002233	-0.953802738	0.003151984	HK1	Hexokinase	Metabolism;Metabolism;Human Diseases;Organismal Systems;Metabolism;Environmental Information Processing;Metabolism;Human Diseases;Metabolism;Metabolism;Human Diseases;Metabolism;Organismal Systems;Metabolism	Global and overview maps;Global and overview maps;Infectious diseases;Endocrine system;Carbohydrate metabolism;Signal transduction;Carbohydrate metabolism;Cancers;Carbohydrate metabolism;Carbohydrate metabolism;Endocrine and metabolic diseases;Carbohydrate metabolism;Digestive system;Biosynthesis of other secondary metabolites	ko01100//Metabolic pathways;ko01200//Carbon metabolism;ko05131//Shigellosis;ko04910//Insulin signaling pathway;ko00520//Amino sugar and nucleotide sugar metabolism;ko04066//HIF-1 signaling pathway;ko00010//Glycolysis / Gluconeogenesis;ko05230//Central carbon metabolism in cancer;ko00500//Starch and sucrose metabolism;ko00052//Galactose metabolism;ko04930//Type II diabetes mellitus;ko00051//Fructo…	K00844;K00844;K00844;K00844;K00844;K00844;K00844;K00844;K00844;K00844;K00844;K00844;K00844;K00844	-	GO:0004396//hexokinase activity;GO:0005524//ATP binding;GO:0005536//glucose binding	GO:0001678//cellular glucose homeostasis;GO:0006096//glycolytic process;GO:0019318//hexose metabolic process
MSTRG.34503.1	Sfur002233	-0.960800202	0.002274819	HK1	Hexokinase	Metabolism;Metabolism;Human Diseases;Organismal Systems;Metabolism;Environmental Information Processing;Metabolism;Human Diseases;Metabolism;Metabolism;Human Diseases;Metabolism;Organismal Systems;Metabolism	Global and overview maps;Global and overview maps;Infectious diseases;Endocrine system;Carbohydrate metabolism;Signal transduction;Carbohydrate metabolism;Cancers;Carbohydrate metabolism;Carbohydrate metabolism;Endocrine and metabolic diseases;Carbohydrate metabolism;Digestive system;Biosynthesis of other secondary metabolites	ko01100//Metabolic pathways;ko01200//Carbon metabolism;ko05131//Shigellosis;ko04910//Insulin signaling pathway;ko00520//Amino sugar and nucleotide sugar metabolism;ko04066//HIF-1 signaling pathway;ko00010//Glycolysis / Gluconeogenesis;ko05230//Central carbon metabolism in cancer;ko00500//Starch and sucrose metabolism;ko00052//Galactose metabolism;ko04930//Type II diabetes mellitus;ko00051//Fructo…	K00844;K00844;K00844;K00844;K00844;K00844;K00844;K00844;K00844;K00844;K00844;K00844;K00844;K00844	-	GO:0004396//hexokinase activity;GO:0005524//ATP binding;GO:0005536//glucose binding	GO:0001678//cellular glucose homeostasis;GO:0006096//glycolytic process;GO:0019318//hexose metabolic process
MSTRG.11682.1	Sfur002233	-0.961004011	0.00225138	HK1	Hexokinase	Metabolism;Metabolism;Human Diseases;Organismal Systems;Metabolism;Environmental Information Processing;Metabolism;Human Diseases;Metabolism;Metabolism;Human Diseases;Metabolism;Organismal Systems;Metabolism	Global and overview maps;Global and overview maps;Infectious diseases;Endocrine system;Carbohydrate metabolism;Signal transduction;Carbohydrate metabolism;Cancers;Carbohydrate metabolism;Carbohydrate metabolism;Endocrine and metabolic diseases;Carbohydrate metabolism;Digestive system;Biosynthesis of other secondary metabolites	ko01100//Metabolic pathways;ko01200//Carbon metabolism;ko05131//Shigellosis;ko04910//Insulin signaling pathway;ko00520//Amino sugar and nucleotide sugar metabolism;ko04066//HIF-1 signaling pathway;ko00010//Glycolysis / Gluconeogenesis;ko05230//Central carbon metabolism in cancer;ko00500//Starch and sucrose metabolism;ko00052//Galactose metabolism;ko04930//Type II diabetes mellitus;ko00051//Fructo…	K00844;K00844;K00844;K00844;K00844;K00844;K00844;K00844;K00844;K00844;K00844;K00844;K00844;K00844	-	GO:0004396//hexokinase activity;GO:0005524//ATP binding;GO:0005536//glucose binding	GO:0001678//cellular glucose homeostasis;GO:0006096//glycolytic process;GO:0019318//hexose metabolic process
MSTRG.18015.1	Sfur002233	-0.961609617	0.002182442	HK1	Hexokinase	Metabolism;Metabolism;Human Diseases;Organismal Systems;Metabolism;Environmental Information Processing;Metabolism;Human Diseases;Metabolism;Metabolism;Human Diseases;Metabolism;Organismal Systems;Metabolism	Global and overview maps;Global and overview maps;Infectious diseases;Endocrine system;Carbohydrate metabolism;Signal transduction;Carbohydrate metabolism;Cancers;Carbohydrate metabolism;Carbohydrate metabolism;Endocrine and metabolic diseases;Carbohydrate metabolism;Digestive system;Biosynthesis of other secondary metabolites	ko01100//Metabolic pathways;ko01200//Carbon metabolism;ko05131//Shigellosis;ko04910//Insulin signaling pathway;ko00520//Amino sugar and nucleotide sugar metabolism;ko04066//HIF-1 signaling pathway;ko00010//Glycolysis / Gluconeogenesis;ko05230//Central carbon metabolism in cancer;ko00500//Starch and sucrose metabolism;ko00052//Galactose metabolism;ko04930//Type II diabetes mellitus;ko00051//Fructo…	K00844;K00844;K00844;K00844;K00844;K00844;K00844;K00844;K00844;K00844;K00844;K00844;K00844;K00844	-	GO:0004396//hexokinase activity;GO:0005524//ATP binding;GO:0005536//glucose binding	GO:0001678//cellular glucose homeostasis;GO:0006096//glycolytic process;GO:0019318//hexose metabolic process
MSTRG.27906.1	Sfur002233	-0.980020973	0.000594755	HK1	Hexokinase	Metabolism;Metabolism;Human Diseases;Organismal Systems;Metabolism;Environmental Information Processing;Metabolism;Human Diseases;Metabolism;Metabolism;Human Diseases;Metabolism;Organismal Systems;Metabolism	Global and overview maps;Global and overview maps;Infectious diseases;Endocrine system;Carbohydrate metabolism;Signal transduction;Carbohydrate metabolism;Cancers;Carbohydrate metabolism;Carbohydrate metabolism;Endocrine and metabolic diseases;Carbohydrate metabolism;Digestive system;Biosynthesis of other secondary metabolites	ko01100//Metabolic pathways;ko01200//Carbon metabolism;ko05131//Shigellosis;ko04910//Insulin signaling pathway;ko00520//Amino sugar and nucleotide sugar metabolism;ko04066//HIF-1 signaling pathway;ko00010//Glycolysis / Gluconeogenesis;ko05230//Central carbon metabolism in cancer;ko00500//Starch and sucrose metabolism;ko00052//Galactose metabolism;ko04930//Type II diabetes mellitus;ko00051//Fructo…	K00844;K00844;K00844;K00844;K00844;K00844;K00844;K00844;K00844;K00844;K00844;K00844;K00844;K00844	-	GO:0004396//hexokinase activity;GO:0005524//ATP binding;GO:0005536//glucose binding	GO:0001678//cellular glucose homeostasis;GO:0006096//glycolytic process;GO:0019318//hexose metabolic process
MSTRG.3757.1	Sfur002233	-0.962821331	0.002047685	HK1	Hexokinase	Metabolism;Metabolism;Human Diseases;Organismal Systems;Metabolism;Environmental Information Processing;Metabolism;Human Diseases;Metabolism;Metabolism;Human Diseases;Metabolism;Organismal Systems;Metabolism	Global and overview maps;Global and overview maps;Infectious diseases;Endocrine system;Carbohydrate metabolism;Signal transduction;Carbohydrate metabolism;Cancers;Carbohydrate metabolism;Carbohydrate metabolism;Endocrine and metabolic diseases;Carbohydrate metabolism;Digestive system;Biosynthesis of other secondary metabolites	ko01100//Metabolic pathways;ko01200//Carbon metabolism;ko05131//Shigellosis;ko04910//Insulin signaling pathway;ko00520//Amino sugar and nucleotide sugar metabolism;ko04066//HIF-1 signaling pathway;ko00010//Glycolysis / Gluconeogenesis;ko05230//Central carbon metabolism in cancer;ko00500//Starch and sucrose metabolism;ko00052//Galactose metabolism;ko04930//Type II diabetes mellitus;ko00051//Fructo…	K00844;K00844;K00844;K00844;K00844;K00844;K00844;K00844;K00844;K00844;K00844;K00844;K00844;K00844	-	GO:0004396//hexokinase activity;GO:0005524//ATP binding;GO:0005536//glucose binding	GO:0001678//cellular glucose homeostasis;GO:0006096//glycolytic process;GO:0019318//hexose metabolic process
MSTRG.39804.2	Sfur002233	-0.976924825	0.000792552	HK1	Hexokinase	Metabolism;Metabolism;Human Diseases;Organismal Systems;Metabolism;Environmental Information Processing;Metabolism;Human Diseases;Metabolism;Metabolism;Human Diseases;Metabolism;Organismal Systems;Metabolism	Global and overview maps;Global and overview maps;Infectious diseases;Endocrine system;Carbohydrate metabolism;Signal transduction;Carbohydrate metabolism;Cancers;Carbohydrate metabolism;Carbohydrate metabolism;Endocrine and metabolic diseases;Carbohydrate metabolism;Digestive system;Biosynthesis of other secondary metabolites	ko01100//Metabolic pathways;ko01200//Carbon metabolism;ko05131//Shigellosis;ko04910//Insulin signaling pathway;ko00520//Amino sugar and nucleotide sugar metabolism;ko04066//HIF-1 signaling pathway;ko00010//Glycolysis / Gluconeogenesis;ko05230//Central carbon metabolism in cancer;ko00500//Starch and sucrose metabolism;ko00052//Galactose metabolism;ko04930//Type II diabetes mellitus;ko00051//Fructo…	K00844;K00844;K00844;K00844;K00844;K00844;K00844;K00844;K00844;K00844;K00844;K00844;K00844;K00844	-	GO:0004396//hexokinase activity;GO:0005524//ATP binding;GO:0005536//glucose binding	GO:0001678//cellular glucose homeostasis;GO:0006096//glycolytic process;GO:0019318//hexose metabolic process
MSTRG.6174.1	Sfur002233	-0.966779878	0.001637034	HK1	Hexokinase	Metabolism;Metabolism;Human Diseases;Organismal Systems;Metabolism;Environmental Information Processing;Metabolism;Human Diseases;Metabolism;Metabolism;Human Diseases;Metabolism;Organismal Systems;Metabolism	Global and overview maps;Global and overview maps;Infectious diseases;Endocrine system;Carbohydrate metabolism;Signal transduction;Carbohydrate metabolism;Cancers;Carbohydrate metabolism;Carbohydrate metabolism;Endocrine and metabolic diseases;Carbohydrate metabolism;Digestive system;Biosynthesis of other secondary metabolites	ko01100//Metabolic pathways;ko01200//Carbon metabolism;ko05131//Shigellosis;ko04910//Insulin signaling pathway;ko00520//Amino sugar and nucleotide sugar metabolism;ko04066//HIF-1 signaling pathway;ko00010//Glycolysis / Gluconeogenesis;ko05230//Central carbon metabolism in cancer;ko00500//Starch and sucrose metabolism;ko00052//Galactose metabolism;ko04930//Type II diabetes mellitus;ko00051//Fructo…	K00844;K00844;K00844;K00844;K00844;K00844;K00844;K00844;K00844;K00844;K00844;K00844;K00844;K00844	-	GO:0004396//hexokinase activity;GO:0005524//ATP binding;GO:0005536//glucose binding	GO:0001678//cellular glucose homeostasis;GO:0006096//glycolytic process;GO:0019318//hexose metabolic process
MSTRG.19942.1	Sfur002233	-0.961105438	0.002239761	HK1	Hexokinase	Metabolism;Metabolism;Human Diseases;Organismal Systems;Metabolism;Environmental Information Processing;Metabolism;Human Diseases;Metabolism;Metabolism;Human Diseases;Metabolism;Organismal Systems;Metabolism	Global and overview maps;Global and overview maps;Infectious diseases;Endocrine system;Carbohydrate metabolism;Signal transduction;Carbohydrate metabolism;Cancers;Carbohydrate metabolism;Carbohydrate metabolism;Endocrine and metabolic diseases;Carbohydrate metabolism;Digestive system;Biosynthesis of other secondary metabolites	ko01100//Metabolic pathways;ko01200//Carbon metabolism;ko05131//Shigellosis;ko04910//Insulin signaling pathway;ko00520//Amino sugar and nucleotide sugar metabolism;ko04066//HIF-1 signaling pathway;ko00010//Glycolysis / Gluconeogenesis;ko05230//Central carbon metabolism in cancer;ko00500//Starch and sucrose metabolism;ko00052//Galactose metabolism;ko04930//Type II diabetes mellitus;ko00051//Fructo…	K00844;K00844;K00844;K00844;K00844;K00844;K00844;K00844;K00844;K00844;K00844;K00844;K00844;K00844	-	GO:0004396//hexokinase activity;GO:0005524//ATP binding;GO:0005536//glucose binding	GO:0001678//cellular glucose homeostasis;GO:0006096//glycolytic process;GO:0019318//hexose metabolic process
MSTRG.38770.1	Sfur002233	-0.9515765	0.003460481	HK1	Hexokinase	Metabolism;Metabolism;Human Diseases;Organismal Systems;Metabolism;Environmental Information Processing;Metabolism;Human Diseases;Metabolism;Metabolism;Human Diseases;Metabolism;Organismal Systems;Metabolism	Global and overview maps;Global and overview maps;Infectious diseases;Endocrine system;Carbohydrate metabolism;Signal transduction;Carbohydrate metabolism;Cancers;Carbohydrate metabolism;Carbohydrate metabolism;Endocrine and metabolic diseases;Carbohydrate metabolism;Digestive system;Biosynthesis of other secondary metabolites	ko01100//Metabolic pathways;ko01200//Carbon metabolism;ko05131//Shigellosis;ko04910//Insulin signaling pathway;ko00520//Amino sugar and nucleotide sugar metabolism;ko04066//HIF-1 signaling pathway;ko00010//Glycolysis / Gluconeogenesis;ko05230//Central carbon metabolism in cancer;ko00500//Starch and sucrose metabolism;ko00052//Galactose metabolism;ko04930//Type II diabetes mellitus;ko00051//Fructo…	K00844;K00844;K00844;K00844;K00844;K00844;K00844;K00844;K00844;K00844;K00844;K00844;K00844;K00844	-	GO:0004396//hexokinase activity;GO:0005524//ATP binding;GO:0005536//glucose binding	GO:0001678//cellular glucose homeostasis;GO:0006096//glycolytic process;GO:0019318//hexose metabolic process
MSTRG.36307.1	Sfur002233	-0.958388624	0.002561235	HK1	Hexokinase	Metabolism;Metabolism;Human Diseases;Organismal Systems;Metabolism;Environmental Information Processing;Metabolism;Human Diseases;Metabolism;Metabolism;Human Diseases;Metabolism;Organismal Systems;Metabolism	Global and overview maps;Global and overview maps;Infectious diseases;Endocrine system;Carbohydrate metabolism;Signal transduction;Carbohydrate metabolism;Cancers;Carbohydrate metabolism;Carbohydrate metabolism;Endocrine and metabolic diseases;Carbohydrate metabolism;Digestive system;Biosynthesis of other secondary metabolites	ko01100//Metabolic pathways;ko01200//Carbon metabolism;ko05131//Shigellosis;ko04910//Insulin signaling pathway;ko00520//Amino sugar and nucleotide sugar metabolism;ko04066//HIF-1 signaling pathway;ko00010//Glycolysis / Gluconeogenesis;ko05230//Central carbon metabolism in cancer;ko00500//Starch and sucrose metabolism;ko00052//Galactose metabolism;ko04930//Type II diabetes mellitus;ko00051//Fructo…	K00844;K00844;K00844;K00844;K00844;K00844;K00844;K00844;K00844;K00844;K00844;K00844;K00844;K00844	-	GO:0004396//hexokinase activity;GO:0005524//ATP binding;GO:0005536//glucose binding	GO:0001678//cellular glucose homeostasis;GO:0006096//glycolytic process;GO:0019318//hexose metabolic process
MSTRG.37964.2	Sfur002233	-0.981667846	0.000501021	HK1	Hexokinase	Metabolism;Metabolism;Human Diseases;Organismal Systems;Metabolism;Environmental Information Processing;Metabolism;Human Diseases;Metabolism;Metabolism;Human Diseases;Metabolism;Organismal Systems;Metabolism	Global and overview maps;Global and overview maps;Infectious diseases;Endocrine system;Carbohydrate metabolism;Signal transduction;Carbohydrate metabolism;Cancers;Carbohydrate metabolism;Carbohydrate metabolism;Endocrine and metabolic diseases;Carbohydrate metabolism;Digestive system;Biosynthesis of other secondary metabolites	ko01100//Metabolic pathways;ko01200//Carbon metabolism;ko05131//Shigellosis;ko04910//Insulin signaling pathway;ko00520//Amino sugar and nucleotide sugar metabolism;ko04066//HIF-1 signaling pathway;ko00010//Glycolysis / Gluconeogenesis;ko05230//Central carbon metabolism in cancer;ko00500//Starch and sucrose metabolism;ko00052//Galactose metabolism;ko04930//Type II diabetes mellitus;ko00051//Fructo…	K00844;K00844;K00844;K00844;K00844;K00844;K00844;K00844;K00844;K00844;K00844;K00844;K00844;K00844	-	GO:0004396//hexokinase activity;GO:0005524//ATP binding;GO:0005536//glucose binding	GO:0001678//cellular glucose homeostasis;GO:0006096//glycolytic process;GO:0019318//hexose metabolic process
MSTRG.10391.1	Sfur002233	-0.957468262	0.002674954	HK1	Hexokinase	Metabolism;Metabolism;Human Diseases;Organismal Systems;Metabolism;Environmental Information Processing;Metabolism;Human Diseases;Metabolism;Metabolism;Human Diseases;Metabolism;Organismal Systems;Metabolism	Global and overview maps;Global and overview maps;Infectious diseases;Endocrine system;Carbohydrate metabolism;Signal transduction;Carbohydrate metabolism;Cancers;Carbohydrate metabolism;Carbohydrate metabolism;Endocrine and metabolic diseases;Carbohydrate metabolism;Digestive system;Biosynthesis of other secondary metabolites	ko01100//Metabolic pathways;ko01200//Carbon metabolism;ko05131//Shigellosis;ko04910//Insulin signaling pathway;ko00520//Amino sugar and nucleotide sugar metabolism;ko04066//HIF-1 signaling pathway;ko00010//Glycolysis / Gluconeogenesis;ko05230//Central carbon metabolism in cancer;ko00500//Starch and sucrose metabolism;ko00052//Galactose metabolism;ko04930//Type II diabetes mellitus;ko00051//Fructo…	K00844;K00844;K00844;K00844;K00844;K00844;K00844;K00844;K00844;K00844;K00844;K00844;K00844;K00844	-	GO:0004396//hexokinase activity;GO:0005524//ATP binding;GO:0005536//glucose binding	GO:0001678//cellular glucose homeostasis;GO:0006096//glycolytic process;GO:0019318//hexose metabolic process
MSTRG.16086.1	Sfur008604	-0.989776464	0.000156247	chs-2	Chitin synthase chs-2	Metabolism;Metabolism	Global and overview maps;Carbohydrate metabolism	ko01100//Metabolic pathways;ko00520//Amino sugar and nucleotide sugar metabolism	K00698;K00698	GO:0005886//plasma membrane;GO:0016021//integral component of membrane;GO:0030428//cell septum;GO:0071944//cell periphery	GO:0004100//chitin synthase activity	GO:0006031//chitin biosynthetic process;GO:0007275//multicellular organism development;GO:0061063//positive regulation of nematode larval development
MSTRG.16087.1	Sfur008604	-0.990132421	0.000145573	chs-2	Chitin synthase chs-2	Metabolism;Metabolism	Global and overview maps;Carbohydrate metabolism	ko01100//Metabolic pathways;ko00520//Amino sugar and nucleotide sugar metabolism	K00698;K00698	GO:0005886//plasma membrane;GO:0016021//integral component of membrane;GO:0030428//cell septum;GO:0071944//cell periphery	GO:0004100//chitin synthase activity	GO:0006031//chitin biosynthetic process;GO:0007275//multicellular organism development;GO:0061063//positive regulation of nematode larval development
MSTRG.33773.1	Sfur008604	-0.956704032	0.002771231	chs-2	Chitin synthase chs-2	Metabolism;Metabolism	Global and overview maps;Carbohydrate metabolism	ko01100//Metabolic pathways;ko00520//Amino sugar and nucleotide sugar metabolism	K00698;K00698	GO:0005886//plasma membrane;GO:0016021//integral component of membrane;GO:0030428//cell septum;GO:0071944//cell periphery	GO:0004100//chitin synthase activity	GO:0006031//chitin biosynthetic process;GO:0007275//multicellular organism development;GO:0061063//positive regulation of nematode larval development
MSTRG.37207.2	Sfur008604	-0.985305641	0.0003223	chs-2	Chitin synthase chs-2	Metabolism;Metabolism	Global and overview maps;Carbohydrate metabolism	ko01100//Metabolic pathways;ko00520//Amino sugar and nucleotide sugar metabolism	K00698;K00698	GO:0005886//plasma membrane;GO:0016021//integral component of membrane;GO:0030428//cell septum;GO:0071944//cell periphery	GO:0004100//chitin synthase activity	GO:0006031//chitin biosynthetic process;GO:0007275//multicellular organism development;GO:0061063//positive regulation of nematode larval development
MSTRG.19835.2	Sfur008604	0.970074594	0.001329895	chs-2	Chitin synthase chs-2	Metabolism;Metabolism	Global and overview maps;Carbohydrate metabolism	ko01100//Metabolic pathways;ko00520//Amino sugar and nucleotide sugar metabolism	K00698;K00698	GO:0005886//plasma membrane;GO:0016021//integral component of membrane;GO:0030428//cell septum;GO:0071944//cell periphery	GO:0004100//chitin synthase activity	GO:0006031//chitin biosynthetic process;GO:0007275//multicellular organism development;GO:0061063//positive regulation of nematode larval development
MSTRG.8295.1	Sfur008604	-0.975015943	0.000928507	chs-2	Chitin synthase chs-2	Metabolism;Metabolism	Global and overview maps;Carbohydrate metabolism	ko01100//Metabolic pathways;ko00520//Amino sugar and nucleotide sugar metabolism	K00698;K00698	GO:0005886//plasma membrane;GO:0016021//integral component of membrane;GO:0030428//cell septum;GO:0071944//cell periphery	GO:0004100//chitin synthase activity	GO:0006031//chitin biosynthetic process;GO:0007275//multicellular organism development;GO:0061063//positive regulation of nematode larval development
MSTRG.23212.1	Sfur008604	0.991618909	0.00010507	chs-2	Chitin synthase chs-2	Metabolism;Metabolism	Global and overview maps;Carbohydrate metabolism	ko01100//Metabolic pathways;ko00520//Amino sugar and nucleotide sugar metabolism	K00698;K00698	GO:0005886//plasma membrane;GO:0016021//integral component of membrane;GO:0030428//cell septum;GO:0071944//cell periphery	GO:0004100//chitin synthase activity	GO:0006031//chitin biosynthetic process;GO:0007275//multicellular organism development;GO:0061063//positive regulation of nematode larval development
MSTRG.11199.1	Sfur008604	-0.985121348	0.000330415	chs-2	Chitin synthase chs-2	Metabolism;Metabolism	Global and overview maps;Carbohydrate metabolism	ko01100//Metabolic pathways;ko00520//Amino sugar and nucleotide sugar metabolism	K00698;K00698	GO:0005886//plasma membrane;GO:0016021//integral component of membrane;GO:0030428//cell septum;GO:0071944//cell periphery	GO:0004100//chitin synthase activity	GO:0006031//chitin biosynthetic process;GO:0007275//multicellular organism development;GO:0061063//positive regulation of nematode larval development
MSTRG.37208.3	Sfur008604	-0.973820284	0.001019095	chs-2	Chitin synthase chs-2	Metabolism;Metabolism	Global and overview maps;Carbohydrate metabolism	ko01100//Metabolic pathways;ko00520//Amino sugar and nucleotide sugar metabolism	K00698;K00698	GO:0005886//plasma membrane;GO:0016021//integral component of membrane;GO:0030428//cell septum;GO:0071944//cell periphery	GO:0004100//chitin synthase activity	GO:0006031//chitin biosynthetic process;GO:0007275//multicellular organism development;GO:0061063//positive regulation of nematode larval development
MSTRG.28277.1	Sfur008604	0.989786758	0.000155933	chs-2	Chitin synthase chs-2	Metabolism;Metabolism	Global and overview maps;Carbohydrate metabolism	ko01100//Metabolic pathways;ko00520//Amino sugar and nucleotide sugar metabolism	K00698;K00698	GO:0005886//plasma membrane;GO:0016021//integral component of membrane;GO:0030428//cell septum;GO:0071944//cell periphery	GO:0004100//chitin synthase activity	GO:0006031//chitin biosynthetic process;GO:0007275//multicellular organism development;GO:0061063//positive regulation of nematode larval development
MSTRG.32060.1	Sfur008604	-0.980670081	0.000556857	chs-2	Chitin synthase chs-2	Metabolism;Metabolism	Global and overview maps;Carbohydrate metabolism	ko01100//Metabolic pathways;ko00520//Amino sugar and nucleotide sugar metabolism	K00698;K00698	GO:0005886//plasma membrane;GO:0016021//integral component of membrane;GO:0030428//cell septum;GO:0071944//cell periphery	GO:0004100//chitin synthase activity	GO:0006031//chitin biosynthetic process;GO:0007275//multicellular organism development;GO:0061063//positive regulation of nematode larval development
MSTRG.2447.1	Sfur008604	-0.970555515	0.001287703	chs-2	Chitin synthase chs-2	Metabolism;Metabolism	Global and overview maps;Carbohydrate metabolism	ko01100//Metabolic pathways;ko00520//Amino sugar and nucleotide sugar metabolism	K00698;K00698	GO:0005886//plasma membrane;GO:0016021//integral component of membrane;GO:0030428//cell septum;GO:0071944//cell periphery	GO:0004100//chitin synthase activity	GO:0006031//chitin biosynthetic process;GO:0007275//multicellular organism development;GO:0061063//positive regulation of nematode larval development
MSTRG.34473.3	Sfur008604	-0.99037318	0.000138567	chs-2	Chitin synthase chs-2	Metabolism;Metabolism	Global and overview maps;Carbohydrate metabolism	ko01100//Metabolic pathways;ko00520//Amino sugar and nucleotide sugar metabolism	K00698;K00698	GO:0005886//plasma membrane;GO:0016021//integral component of membrane;GO:0030428//cell septum;GO:0071944//cell periphery	GO:0004100//chitin synthase activity	GO:0006031//chitin biosynthetic process;GO:0007275//multicellular organism development;GO:0061063//positive regulation of nematode larval development
MSTRG.34474.2	Sfur008604	-0.988219459	0.000207354	chs-2	Chitin synthase chs-2	Metabolism;Metabolism	Global and overview maps;Carbohydrate metabolism	ko01100//Metabolic pathways;ko00520//Amino sugar and nucleotide sugar metabolism	K00698;K00698	GO:0005886//plasma membrane;GO:0016021//integral component of membrane;GO:0030428//cell septum;GO:0071944//cell periphery	GO:0004100//chitin synthase activity	GO:0006031//chitin biosynthetic process;GO:0007275//multicellular organism development;GO:0061063//positive regulation of nematode larval development
MSTRG.39995.1	Sfur008604	0.964642794	0.001853097	chs-2	Chitin synthase chs-2	Metabolism;Metabolism	Global and overview maps;Carbohydrate metabolism	ko01100//Metabolic pathways;ko00520//Amino sugar and nucleotide sugar metabolism	K00698;K00698	GO:0005886//plasma membrane;GO:0016021//integral component of membrane;GO:0030428//cell septum;GO:0071944//cell periphery	GO:0004100//chitin synthase activity	GO:0006031//chitin biosynthetic process;GO:0007275//multicellular organism development;GO:0061063//positive regulation of nematode larval development
MSTRG.28277.2	Sfur008604	0.966203087	0.001694045	chs-2	Chitin synthase chs-2	Metabolism;Metabolism	Global and overview maps;Carbohydrate metabolism	ko01100//Metabolic pathways;ko00520//Amino sugar and nucleotide sugar metabolism	K00698;K00698	GO:0005886//plasma membrane;GO:0016021//integral component of membrane;GO:0030428//cell septum;GO:0071944//cell periphery	GO:0004100//chitin synthase activity	GO:0006031//chitin biosynthetic process;GO:0007275//multicellular organism development;GO:0061063//positive regulation of nematode larval development
MSTRG.32781.2	Sfur008604	-0.968054504	0.001514472	chs-2	Chitin synthase chs-2	Metabolism;Metabolism	Global and overview maps;Carbohydrate metabolism	ko01100//Metabolic pathways;ko00520//Amino sugar and nucleotide sugar metabolism	K00698;K00698	GO:0005886//plasma membrane;GO:0016021//integral component of membrane;GO:0030428//cell septum;GO:0071944//cell periphery	GO:0004100//chitin synthase activity	GO:0006031//chitin biosynthetic process;GO:0007275//multicellular organism development;GO:0061063//positive regulation of nematode larval development
MSTRG.10562.1	Sfur008604	-0.990485636	0.000135354	chs-2	Chitin synthase chs-2	Metabolism;Metabolism	Global and overview maps;Carbohydrate metabolism	ko01100//Metabolic pathways;ko00520//Amino sugar and nucleotide sugar metabolism	K00698;K00698	GO:0005886//plasma membrane;GO:0016021//integral component of membrane;GO:0030428//cell septum;GO:0071944//cell periphery	GO:0004100//chitin synthase activity	GO:0006031//chitin biosynthetic process;GO:0007275//multicellular organism development;GO:0061063//positive regulation of nematode larval development
MSTRG.30274.1	Sfur008604	-0.982585413	0.000452261	chs-2	Chitin synthase chs-2	Metabolism;Metabolism	Global and overview maps;Carbohydrate metabolism	ko01100//Metabolic pathways;ko00520//Amino sugar and nucleotide sugar metabolism	K00698;K00698	GO:0005886//plasma membrane;GO:0016021//integral component of membrane;GO:0030428//cell septum;GO:0071944//cell periphery	GO:0004100//chitin synthase activity	GO:0006031//chitin biosynthetic process;GO:0007275//multicellular organism development;GO:0061063//positive regulation of nematode larval development
MSTRG.20058.1	Sfur008604	-0.991310961	0.000112921	chs-2	Chitin synthase chs-2	Metabolism;Metabolism	Global and overview maps;Carbohydrate metabolism	ko01100//Metabolic pathways;ko00520//Amino sugar and nucleotide sugar metabolism	K00698;K00698	GO:0005886//plasma membrane;GO:0016021//integral component of membrane;GO:0030428//cell septum;GO:0071944//cell periphery	GO:0004100//chitin synthase activity	GO:0006031//chitin biosynthetic process;GO:0007275//multicellular organism development;GO:0061063//positive regulation of nematode larval development
MSTRG.19036.1	Sfur008604	0.966689196	0.001645933	chs-2	Chitin synthase chs-2	Metabolism;Metabolism	Global and overview maps;Carbohydrate metabolism	ko01100//Metabolic pathways;ko00520//Amino sugar and nucleotide sugar metabolism	K00698;K00698	GO:0005886//plasma membrane;GO:0016021//integral component of membrane;GO:0030428//cell septum;GO:0071944//cell periphery	GO:0004100//chitin synthase activity	GO:0006031//chitin biosynthetic process;GO:0007275//multicellular organism development;GO:0061063//positive regulation of nematode larval development
MSTRG.38291.5	Sfur008604	-0.990367182	0.00013874	chs-2	Chitin synthase chs-2	Metabolism;Metabolism	Global and overview maps;Carbohydrate metabolism	ko01100//Metabolic pathways;ko00520//Amino sugar and nucleotide sugar metabolism	K00698;K00698	GO:0005886//plasma membrane;GO:0016021//integral component of membrane;GO:0030428//cell septum;GO:0071944//cell periphery	GO:0004100//chitin synthase activity	GO:0006031//chitin biosynthetic process;GO:0007275//multicellular organism development;GO:0061063//positive regulation of nematode larval development
MSTRG.36165.1	Sfur008604	0.980963475	0.000540135	chs-2	Chitin synthase chs-2	Metabolism;Metabolism	Global and overview maps;Carbohydrate metabolism	ko01100//Metabolic pathways;ko00520//Amino sugar and nucleotide sugar metabolism	K00698;K00698	GO:0005886//plasma membrane;GO:0016021//integral component of membrane;GO:0030428//cell septum;GO:0071944//cell periphery	GO:0004100//chitin synthase activity	GO:0006031//chitin biosynthetic process;GO:0007275//multicellular organism development;GO:0061063//positive regulation of nematode larval development
MSTRG.25434.2	Sfur008604	-0.971954699	0.001168779	chs-2	Chitin synthase chs-2	Metabolism;Metabolism	Global and overview maps;Carbohydrate metabolism	ko01100//Metabolic pathways;ko00520//Amino sugar and nucleotide sugar metabolism	K00698;K00698	GO:0005886//plasma membrane;GO:0016021//integral component of membrane;GO:0030428//cell septum;GO:0071944//cell periphery	GO:0004100//chitin synthase activity	GO:0006031//chitin biosynthetic process;GO:0007275//multicellular organism development;GO:0061063//positive regulation of nematode larval development
MSTRG.30141.1	Sfur008604	0.970124427	0.001325492	chs-2	Chitin synthase chs-2	Metabolism;Metabolism	Global and overview maps;Carbohydrate metabolism	ko01100//Metabolic pathways;ko00520//Amino sugar and nucleotide sugar metabolism	K00698;K00698	GO:0005886//plasma membrane;GO:0016021//integral component of membrane;GO:0030428//cell septum;GO:0071944//cell periphery	GO:0004100//chitin synthase activity	GO:0006031//chitin biosynthetic process;GO:0007275//multicellular organism development;GO:0061063//positive regulation of nematode larval development
MSTRG.36147.1	Sfur008604	0.953568944	0.003183715	chs-2	Chitin synthase chs-2	Metabolism;Metabolism	Global and overview maps;Carbohydrate metabolism	ko01100//Metabolic pathways;ko00520//Amino sugar and nucleotide sugar metabolism	K00698;K00698	GO:0005886//plasma membrane;GO:0016021//integral component of membrane;GO:0030428//cell septum;GO:0071944//cell periphery	GO:0004100//chitin synthase activity	GO:0006031//chitin biosynthetic process;GO:0007275//multicellular organism development;GO:0061063//positive regulation of nematode larval development
MSTRG.9698.2	Sfur008604	0.970136595	0.001324418	chs-2	Chitin synthase chs-2	Metabolism;Metabolism	Global and overview maps;Carbohydrate metabolism	ko01100//Metabolic pathways;ko00520//Amino sugar and nucleotide sugar metabolism	K00698;K00698	GO:0005886//plasma membrane;GO:0016021//integral component of membrane;GO:0030428//cell septum;GO:0071944//cell periphery	GO:0004100//chitin synthase activity	GO:0006031//chitin biosynthetic process;GO:0007275//multicellular organism development;GO:0061063//positive regulation of nematode larval development
MSTRG.1725.5	Sfur008604	0.971268056	0.001226427	chs-2	Chitin synthase chs-2	Metabolism;Metabolism	Global and overview maps;Carbohydrate metabolism	ko01100//Metabolic pathways;ko00520//Amino sugar and nucleotide sugar metabolism	K00698;K00698	GO:0005886//plasma membrane;GO:0016021//integral component of membrane;GO:0030428//cell septum;GO:0071944//cell periphery	GO:0004100//chitin synthase activity	GO:0006031//chitin biosynthetic process;GO:0007275//multicellular organism development;GO:0061063//positive regulation of nematode larval development
MSTRG.11198.1	Sfur008604	0.953019637	0.003258885	chs-2	Chitin synthase chs-2	Metabolism;Metabolism	Global and overview maps;Carbohydrate metabolism	ko01100//Metabolic pathways;ko00520//Amino sugar and nucleotide sugar metabolism	K00698;K00698	GO:0005886//plasma membrane;GO:0016021//integral component of membrane;GO:0030428//cell septum;GO:0071944//cell periphery	GO:0004100//chitin synthase activity	GO:0006031//chitin biosynthetic process;GO:0007275//multicellular organism development;GO:0061063//positive regulation of nematode larval development
MSTRG.21272.1	Sfur008604	-0.959877806	0.002382391	chs-2	Chitin synthase chs-2	Metabolism;Metabolism	Global and overview maps;Carbohydrate metabolism	ko01100//Metabolic pathways;ko00520//Amino sugar and nucleotide sugar metabolism	K00698;K00698	GO:0005886//plasma membrane;GO:0016021//integral component of membrane;GO:0030428//cell septum;GO:0071944//cell periphery	GO:0004100//chitin synthase activity	GO:0006031//chitin biosynthetic process;GO:0007275//multicellular organism development;GO:0061063//positive regulation of nematode larval development
MSTRG.4465.1	Sfur008604	0.973018299	0.001082197	chs-2	Chitin synthase chs-2	Metabolism;Metabolism	Global and overview maps;Carbohydrate metabolism	ko01100//Metabolic pathways;ko00520//Amino sugar and nucleotide sugar metabolism	K00698;K00698	GO:0005886//plasma membrane;GO:0016021//integral component of membrane;GO:0030428//cell septum;GO:0071944//cell periphery	GO:0004100//chitin synthase activity	GO:0006031//chitin biosynthetic process;GO:0007275//multicellular organism development;GO:0061063//positive regulation of nematode larval development
MSTRG.36087.1	Sfur008604	-0.957274336	0.002699226	chs-2	Chitin synthase chs-2	Metabolism;Metabolism	Global and overview maps;Carbohydrate metabolism	ko01100//Metabolic pathways;ko00520//Amino sugar and nucleotide sugar metabolism	K00698;K00698	GO:0005886//plasma membrane;GO:0016021//integral component of membrane;GO:0030428//cell septum;GO:0071944//cell periphery	GO:0004100//chitin synthase activity	GO:0006031//chitin biosynthetic process;GO:0007275//multicellular organism development;GO:0061063//positive regulation of nematode larval development
MSTRG.23511.1	Sfur008604	0.988941836	0.000182748	chs-2	Chitin synthase chs-2	Metabolism;Metabolism	Global and overview maps;Carbohydrate metabolism	ko01100//Metabolic pathways;ko00520//Amino sugar and nucleotide sugar metabolism	K00698;K00698	GO:0005886//plasma membrane;GO:0016021//integral component of membrane;GO:0030428//cell septum;GO:0071944//cell periphery	GO:0004100//chitin synthase activity	GO:0006031//chitin biosynthetic process;GO:0007275//multicellular organism development;GO:0061063//positive regulation of nematode larval development
MSTRG.32478.1	Sfur008604	0.989215655	0.000173826	chs-2	Chitin synthase chs-2	Metabolism;Metabolism	Global and overview maps;Carbohydrate metabolism	ko01100//Metabolic pathways;ko00520//Amino sugar and nucleotide sugar metabolism	K00698;K00698	GO:0005886//plasma membrane;GO:0016021//integral component of membrane;GO:0030428//cell septum;GO:0071944//cell periphery	GO:0004100//chitin synthase activity	GO:0006031//chitin biosynthetic process;GO:0007275//multicellular organism development;GO:0061063//positive regulation of nematode larval development
MSTRG.19842.1	Sfur008604	0.989504517	0.000164655	chs-2	Chitin synthase chs-2	Metabolism;Metabolism	Global and overview maps;Carbohydrate metabolism	ko01100//Metabolic pathways;ko00520//Amino sugar and nucleotide sugar metabolism	K00698;K00698	GO:0005886//plasma membrane;GO:0016021//integral component of membrane;GO:0030428//cell septum;GO:0071944//cell periphery	GO:0004100//chitin synthase activity	GO:0006031//chitin biosynthetic process;GO:0007275//multicellular organism development;GO:0061063//positive regulation of nematode larval development
MSTRG.17390.3	Sfur008604	-0.973434092	0.001049247	chs-2	Chitin synthase chs-2	Metabolism;Metabolism	Global and overview maps;Carbohydrate metabolism	ko01100//Metabolic pathways;ko00520//Amino sugar and nucleotide sugar metabolism	K00698;K00698	GO:0005886//plasma membrane;GO:0016021//integral component of membrane;GO:0030428//cell septum;GO:0071944//cell periphery	GO:0004100//chitin synthase activity	GO:0006031//chitin biosynthetic process;GO:0007275//multicellular organism development;GO:0061063//positive regulation of nematode larval development
MSTRG.10008.3	Sfur008604	0.962277157	0.002107679	chs-2	Chitin synthase chs-2	Metabolism;Metabolism	Global and overview maps;Carbohydrate metabolism	ko01100//Metabolic pathways;ko00520//Amino sugar and nucleotide sugar metabolism	K00698;K00698	GO:0005886//plasma membrane;GO:0016021//integral component of membrane;GO:0030428//cell septum;GO:0071944//cell periphery	GO:0004100//chitin synthase activity	GO:0006031//chitin biosynthetic process;GO:0007275//multicellular organism development;GO:0061063//positive regulation of nematode larval development
MSTRG.8569.4	Sfur008604	-0.993945522	5.49E-05	chs-2	Chitin synthase chs-2	Metabolism;Metabolism	Global and overview maps;Carbohydrate metabolism	ko01100//Metabolic pathways;ko00520//Amino sugar and nucleotide sugar metabolism	K00698;K00698	GO:0005886//plasma membrane;GO:0016021//integral component of membrane;GO:0030428//cell septum;GO:0071944//cell periphery	GO:0004100//chitin synthase activity	GO:0006031//chitin biosynthetic process;GO:0007275//multicellular organism development;GO:0061063//positive regulation of nematode larval development
MSTRG.22069.1	Sfur008604	0.969805516	0.001353796	chs-2	Chitin synthase chs-2	Metabolism;Metabolism	Global and overview maps;Carbohydrate metabolism	ko01100//Metabolic pathways;ko00520//Amino sugar and nucleotide sugar metabolism	K00698;K00698	GO:0005886//plasma membrane;GO:0016021//integral component of membrane;GO:0030428//cell septum;GO:0071944//cell periphery	GO:0004100//chitin synthase activity	GO:0006031//chitin biosynthetic process;GO:0007275//multicellular organism development;GO:0061063//positive regulation of nematode larval development
MSTRG.32774.2	Sfur008604	-0.9641853	0.00190107	chs-2	Chitin synthase chs-2	Metabolism;Metabolism	Global and overview maps;Carbohydrate metabolism	ko01100//Metabolic pathways;ko00520//Amino sugar and nucleotide sugar metabolism	K00698;K00698	GO:0005886//plasma membrane;GO:0016021//integral component of membrane;GO:0030428//cell septum;GO:0071944//cell periphery	GO:0004100//chitin synthase activity	GO:0006031//chitin biosynthetic process;GO:0007275//multicellular organism development;GO:0061063//positive regulation of nematode larval development
MSTRG.17390.2	Sfur008604	-0.979573198	0.00062162	chs-2	Chitin synthase chs-2	Metabolism;Metabolism	Global and overview maps;Carbohydrate metabolism	ko01100//Metabolic pathways;ko00520//Amino sugar and nucleotide sugar metabolism	K00698;K00698	GO:0005886//plasma membrane;GO:0016021//integral component of membrane;GO:0030428//cell septum;GO:0071944//cell periphery	GO:0004100//chitin synthase activity	GO:0006031//chitin biosynthetic process;GO:0007275//multicellular organism development;GO:0061063//positive regulation of nematode larval development
MSTRG.7675.1	Sfur008604	0.976560021	0.00081771	chs-2	Chitin synthase chs-2	Metabolism;Metabolism	Global and overview maps;Carbohydrate metabolism	ko01100//Metabolic pathways;ko00520//Amino sugar and nucleotide sugar metabolism	K00698;K00698	GO:0005886//plasma membrane;GO:0016021//integral component of membrane;GO:0030428//cell septum;GO:0071944//cell periphery	GO:0004100//chitin synthase activity	GO:0006031//chitin biosynthetic process;GO:0007275//multicellular organism development;GO:0061063//positive regulation of nematode larval development
MSTRG.12497.3	Sfur008604	-0.969440044	0.001386596	chs-2	Chitin synthase chs-2	Metabolism;Metabolism	Global and overview maps;Carbohydrate metabolism	ko01100//Metabolic pathways;ko00520//Amino sugar and nucleotide sugar metabolism	K00698;K00698	GO:0005886//plasma membrane;GO:0016021//integral component of membrane;GO:0030428//cell septum;GO:0071944//cell periphery	GO:0004100//chitin synthase activity	GO:0006031//chitin biosynthetic process;GO:0007275//multicellular organism development;GO:0061063//positive regulation of nematode larval development
MSTRG.34863.1	Sfur008604	0.975073876	0.000924224	chs-2	Chitin synthase chs-2	Metabolism;Metabolism	Global and overview maps;Carbohydrate metabolism	ko01100//Metabolic pathways;ko00520//Amino sugar and nucleotide sugar metabolism	K00698;K00698	GO:0005886//plasma membrane;GO:0016021//integral component of membrane;GO:0030428//cell septum;GO:0071944//cell periphery	GO:0004100//chitin synthase activity	GO:0006031//chitin biosynthetic process;GO:0007275//multicellular organism development;GO:0061063//positive regulation of nematode larval development
MSTRG.33855.2	Sfur008604	-0.966193199	0.001695031	chs-2	Chitin synthase chs-2	Metabolism;Metabolism	Global and overview maps;Carbohydrate metabolism	ko01100//Metabolic pathways;ko00520//Amino sugar and nucleotide sugar metabolism	K00698;K00698	GO:0005886//plasma membrane;GO:0016021//integral component of membrane;GO:0030428//cell septum;GO:0071944//cell periphery	GO:0004100//chitin synthase activity	GO:0006031//chitin biosynthetic process;GO:0007275//multicellular organism development;GO:0061063//positive regulation of nematode larval development
MSTRG.25435.1	Sfur008604	-0.951331729	0.003495263	chs-2	Chitin synthase chs-2	Metabolism;Metabolism	Global and overview maps;Carbohydrate metabolism	ko01100//Metabolic pathways;ko00520//Amino sugar and nucleotide sugar metabolism	K00698;K00698	GO:0005886//plasma membrane;GO:0016021//integral component of membrane;GO:0030428//cell septum;GO:0071944//cell periphery	GO:0004100//chitin synthase activity	GO:0006031//chitin biosynthetic process;GO:0007275//multicellular organism development;GO:0061063//positive regulation of nematode larval development
MSTRG.13227.1	Sfur008604	0.989303469	0.000171012	chs-2	Chitin synthase chs-2	Metabolism;Metabolism	Global and overview maps;Carbohydrate metabolism	ko01100//Metabolic pathways;ko00520//Amino sugar and nucleotide sugar metabolism	K00698;K00698	GO:0005886//plasma membrane;GO:0016021//integral component of membrane;GO:0030428//cell septum;GO:0071944//cell periphery	GO:0004100//chitin synthase activity	GO:0006031//chitin biosynthetic process;GO:0007275//multicellular organism development;GO:0061063//positive regulation of nematode larval development
MSTRG.33709.1	Sfur008604	0.967989409	0.001520617	chs-2	Chitin synthase chs-2	Metabolism;Metabolism	Global and overview maps;Carbohydrate metabolism	ko01100//Metabolic pathways;ko00520//Amino sugar and nucleotide sugar metabolism	K00698;K00698	GO:0005886//plasma membrane;GO:0016021//integral component of membrane;GO:0030428//cell septum;GO:0071944//cell periphery	GO:0004100//chitin synthase activity	GO:0006031//chitin biosynthetic process;GO:0007275//multicellular organism development;GO:0061063//positive regulation of nematode larval development
MSTRG.1716.1	Sfur008604	-0.984389124	0.000363647	chs-2	Chitin synthase chs-2	Metabolism;Metabolism	Global and overview maps;Carbohydrate metabolism	ko01100//Metabolic pathways;ko00520//Amino sugar and nucleotide sugar metabolism	K00698;K00698	GO:0005886//plasma membrane;GO:0016021//integral component of membrane;GO:0030428//cell septum;GO:0071944//cell periphery	GO:0004100//chitin synthase activity	GO:0006031//chitin biosynthetic process;GO:0007275//multicellular organism development;GO:0061063//positive regulation of nematode larval development
MSTRG.24265.1	Sfur008604	0.982285081	0.000467948	chs-2	Chitin synthase chs-2	Metabolism;Metabolism	Global and overview maps;Carbohydrate metabolism	ko01100//Metabolic pathways;ko00520//Amino sugar and nucleotide sugar metabolism	K00698;K00698	GO:0005886//plasma membrane;GO:0016021//integral component of membrane;GO:0030428//cell septum;GO:0071944//cell periphery	GO:0004100//chitin synthase activity	GO:0006031//chitin biosynthetic process;GO:0007275//multicellular organism development;GO:0061063//positive regulation of nematode larval development
MSTRG.31782.2	Sfur008604	-0.961380649	0.002208382	chs-2	Chitin synthase chs-2	Metabolism;Metabolism	Global and overview maps;Carbohydrate metabolism	ko01100//Metabolic pathways;ko00520//Amino sugar and nucleotide sugar metabolism	K00698;K00698	GO:0005886//plasma membrane;GO:0016021//integral component of membrane;GO:0030428//cell septum;GO:0071944//cell periphery	GO:0004100//chitin synthase activity	GO:0006031//chitin biosynthetic process;GO:0007275//multicellular organism development;GO:0061063//positive regulation of nematode larval development
MSTRG.31005.1	Sfur008604	-0.971440231	0.001211843	chs-2	Chitin synthase chs-2	Metabolism;Metabolism	Global and overview maps;Carbohydrate metabolism	ko01100//Metabolic pathways;ko00520//Amino sugar and nucleotide sugar metabolism	K00698;K00698	GO:0005886//plasma membrane;GO:0016021//integral component of membrane;GO:0030428//cell septum;GO:0071944//cell periphery	GO:0004100//chitin synthase activity	GO:0006031//chitin biosynthetic process;GO:0007275//multicellular organism development;GO:0061063//positive regulation of nematode larval development
MSTRG.23863.1	Sfur008604	-0.984664113	0.000350981	chs-2	Chitin synthase chs-2	Metabolism;Metabolism	Global and overview maps;Carbohydrate metabolism	ko01100//Metabolic pathways;ko00520//Amino sugar and nucleotide sugar metabolism	K00698;K00698	GO:0005886//plasma membrane;GO:0016021//integral component of membrane;GO:0030428//cell septum;GO:0071944//cell periphery	GO:0004100//chitin synthase activity	GO:0006031//chitin biosynthetic process;GO:0007275//multicellular organism development;GO:0061063//positive regulation of nematode larval development
MSTRG.11947.1	Sfur008604	0.989903816	0.000152385	chs-2	Chitin synthase chs-2	Metabolism;Metabolism	Global and overview maps;Carbohydrate metabolism	ko01100//Metabolic pathways;ko00520//Amino sugar and nucleotide sugar metabolism	K00698;K00698	GO:0005886//plasma membrane;GO:0016021//integral component of membrane;GO:0030428//cell septum;GO:0071944//cell periphery	GO:0004100//chitin synthase activity	GO:0006031//chitin biosynthetic process;GO:0007275//multicellular organism development;GO:0061063//positive regulation of nematode larval development
MSTRG.18635.5	Sfur008604	-0.980079329	0.000591297	chs-2	Chitin synthase chs-2	Metabolism;Metabolism	Global and overview maps;Carbohydrate metabolism	ko01100//Metabolic pathways;ko00520//Amino sugar and nucleotide sugar metabolism	K00698;K00698	GO:0005886//plasma membrane;GO:0016021//integral component of membrane;GO:0030428//cell septum;GO:0071944//cell periphery	GO:0004100//chitin synthase activity	GO:0006031//chitin biosynthetic process;GO:0007275//multicellular organism development;GO:0061063//positive regulation of nematode larval development
MSTRG.32758.2	Sfur008604	0.955428092	0.002935708	chs-2	Chitin synthase chs-2	Metabolism;Metabolism	Global and overview maps;Carbohydrate metabolism	ko01100//Metabolic pathways;ko00520//Amino sugar and nucleotide sugar metabolism	K00698;K00698	GO:0005886//plasma membrane;GO:0016021//integral component of membrane;GO:0030428//cell septum;GO:0071944//cell periphery	GO:0004100//chitin synthase activity	GO:0006031//chitin biosynthetic process;GO:0007275//multicellular organism development;GO:0061063//positive regulation of nematode larval development
MSTRG.37149.1	Sfur008604	0.978692044	0.000676206	chs-2	Chitin synthase chs-2	Metabolism;Metabolism	Global and overview maps;Carbohydrate metabolism	ko01100//Metabolic pathways;ko00520//Amino sugar and nucleotide sugar metabolism	K00698;K00698	GO:0005886//plasma membrane;GO:0016021//integral component of membrane;GO:0030428//cell septum;GO:0071944//cell periphery	GO:0004100//chitin synthase activity	GO:0006031//chitin biosynthetic process;GO:0007275//multicellular organism development;GO:0061063//positive regulation of nematode larval development
MSTRG.17970.1	Sfur008604	0.966920143	0.001623316	chs-2	Chitin synthase chs-2	Metabolism;Metabolism	Global and overview maps;Carbohydrate metabolism	ko01100//Metabolic pathways;ko00520//Amino sugar and nucleotide sugar metabolism	K00698;K00698	GO:0005886//plasma membrane;GO:0016021//integral component of membrane;GO:0030428//cell septum;GO:0071944//cell periphery	GO:0004100//chitin synthase activity	GO:0006031//chitin biosynthetic process;GO:0007275//multicellular organism development;GO:0061063//positive regulation of nematode larval development
MSTRG.11373.1	Sfur008604	0.968283904	0.001492914	chs-2	Chitin synthase chs-2	Metabolism;Metabolism	Global and overview maps;Carbohydrate metabolism	ko01100//Metabolic pathways;ko00520//Amino sugar and nucleotide sugar metabolism	K00698;K00698	GO:0005886//plasma membrane;GO:0016021//integral component of membrane;GO:0030428//cell septum;GO:0071944//cell periphery	GO:0004100//chitin synthase activity	GO:0006031//chitin biosynthetic process;GO:0007275//multicellular organism development;GO:0061063//positive regulation of nematode larval development
MSTRG.249.1	Sfur008604	0.966682024	0.001646638	chs-2	Chitin synthase chs-2	Metabolism;Metabolism	Global and overview maps;Carbohydrate metabolism	ko01100//Metabolic pathways;ko00520//Amino sugar and nucleotide sugar metabolism	K00698;K00698	GO:0005886//plasma membrane;GO:0016021//integral component of membrane;GO:0030428//cell septum;GO:0071944//cell periphery	GO:0004100//chitin synthase activity	GO:0006031//chitin biosynthetic process;GO:0007275//multicellular organism development;GO:0061063//positive regulation of nematode larval development
MSTRG.13398.2	Sfur008604	0.976405218	0.000828503	chs-2	Chitin synthase chs-2	Metabolism;Metabolism	Global and overview maps;Carbohydrate metabolism	ko01100//Metabolic pathways;ko00520//Amino sugar and nucleotide sugar metabolism	K00698;K00698	GO:0005886//plasma membrane;GO:0016021//integral component of membrane;GO:0030428//cell septum;GO:0071944//cell periphery	GO:0004100//chitin synthase activity	GO:0006031//chitin biosynthetic process;GO:0007275//multicellular organism development;GO:0061063//positive regulation of nematode larval development
MSTRG.14134.1	Sfur008604	-0.989388569	0.000168306	chs-2	Chitin synthase chs-2	Metabolism;Metabolism	Global and overview maps;Carbohydrate metabolism	ko01100//Metabolic pathways;ko00520//Amino sugar and nucleotide sugar metabolism	K00698;K00698	GO:0005886//plasma membrane;GO:0016021//integral component of membrane;GO:0030428//cell septum;GO:0071944//cell periphery	GO:0004100//chitin synthase activity	GO:0006031//chitin biosynthetic process;GO:0007275//multicellular organism development;GO:0061063//positive regulation of nematode larval development
MSTRG.15684.1	Sfur008604	-0.990157871	0.000144825	chs-2	Chitin synthase chs-2	Metabolism;Metabolism	Global and overview maps;Carbohydrate metabolism	ko01100//Metabolic pathways;ko00520//Amino sugar and nucleotide sugar metabolism	K00698;K00698	GO:0005886//plasma membrane;GO:0016021//integral component of membrane;GO:0030428//cell septum;GO:0071944//cell periphery	GO:0004100//chitin synthase activity	GO:0006031//chitin biosynthetic process;GO:0007275//multicellular organism development;GO:0061063//positive regulation of nematode larval development
MSTRG.11223.4	Sfur008604	0.95456642	0.003049423	chs-2	Chitin synthase chs-2	Metabolism;Metabolism	Global and overview maps;Carbohydrate metabolism	ko01100//Metabolic pathways;ko00520//Amino sugar and nucleotide sugar metabolism	K00698;K00698	GO:0005886//plasma membrane;GO:0016021//integral component of membrane;GO:0030428//cell septum;GO:0071944//cell periphery	GO:0004100//chitin synthase activity	GO:0006031//chitin biosynthetic process;GO:0007275//multicellular organism development;GO:0061063//positive regulation of nematode larval development
MSTRG.11349.1	Sfur008604	-0.992138059	9.25E-05	chs-2	Chitin synthase chs-2	Metabolism;Metabolism	Global and overview maps;Carbohydrate metabolism	ko01100//Metabolic pathways;ko00520//Amino sugar and nucleotide sugar metabolism	K00698;K00698	GO:0005886//plasma membrane;GO:0016021//integral component of membrane;GO:0030428//cell septum;GO:0071944//cell periphery	GO:0004100//chitin synthase activity	GO:0006031//chitin biosynthetic process;GO:0007275//multicellular organism development;GO:0061063//positive regulation of nematode larval development
MSTRG.14661.3	Sfur008604	-0.950606977	0.003599255	chs-2	Chitin synthase chs-2	Metabolism;Metabolism	Global and overview maps;Carbohydrate metabolism	ko01100//Metabolic pathways;ko00520//Amino sugar and nucleotide sugar metabolism	K00698;K00698	GO:0005886//plasma membrane;GO:0016021//integral component of membrane;GO:0030428//cell septum;GO:0071944//cell periphery	GO:0004100//chitin synthase activity	GO:0006031//chitin biosynthetic process;GO:0007275//multicellular organism development;GO:0061063//positive regulation of nematode larval development
MSTRG.32770.1	Sfur008604	-0.950867088	0.00356176	chs-2	Chitin synthase chs-2	Metabolism;Metabolism	Global and overview maps;Carbohydrate metabolism	ko01100//Metabolic pathways;ko00520//Amino sugar and nucleotide sugar metabolism	K00698;K00698	GO:0005886//plasma membrane;GO:0016021//integral component of membrane;GO:0030428//cell septum;GO:0071944//cell periphery	GO:0004100//chitin synthase activity	GO:0006031//chitin biosynthetic process;GO:0007275//multicellular organism development;GO:0061063//positive regulation of nematode larval development
MSTRG.35256.1	Sfur008604	0.97243082	0.001129612	chs-2	Chitin synthase chs-2	Metabolism;Metabolism	Global and overview maps;Carbohydrate metabolism	ko01100//Metabolic pathways;ko00520//Amino sugar and nucleotide sugar metabolism	K00698;K00698	GO:0005886//plasma membrane;GO:0016021//integral component of membrane;GO:0030428//cell septum;GO:0071944//cell periphery	GO:0004100//chitin synthase activity	GO:0006031//chitin biosynthetic process;GO:0007275//multicellular organism development;GO:0061063//positive regulation of nematode larval development
MSTRG.36368.1	Sfur008604	0.975971957	0.000859084	chs-2	Chitin synthase chs-2	Metabolism;Metabolism	Global and overview maps;Carbohydrate metabolism	ko01100//Metabolic pathways;ko00520//Amino sugar and nucleotide sugar metabolism	K00698;K00698	GO:0005886//plasma membrane;GO:0016021//integral component of membrane;GO:0030428//cell septum;GO:0071944//cell periphery	GO:0004100//chitin synthase activity	GO:0006031//chitin biosynthetic process;GO:0007275//multicellular organism development;GO:0061063//positive regulation of nematode larval development
MSTRG.2446.2	Sfur008604	-0.959027835	0.002483687	chs-2	Chitin synthase chs-2	Metabolism;Metabolism	Global and overview maps;Carbohydrate metabolism	ko01100//Metabolic pathways;ko00520//Amino sugar and nucleotide sugar metabolism	K00698;K00698	GO:0005886//plasma membrane;GO:0016021//integral component of membrane;GO:0030428//cell septum;GO:0071944//cell periphery	GO:0004100//chitin synthase activity	GO:0006031//chitin biosynthetic process;GO:0007275//multicellular organism development;GO:0061063//positive regulation of nematode larval development
MSTRG.34874.1	Sfur008604	-0.9612017	0.00222876	chs-2	Chitin synthase chs-2	Metabolism;Metabolism	Global and overview maps;Carbohydrate metabolism	ko01100//Metabolic pathways;ko00520//Amino sugar and nucleotide sugar metabolism	K00698;K00698	GO:0005886//plasma membrane;GO:0016021//integral component of membrane;GO:0030428//cell septum;GO:0071944//cell periphery	GO:0004100//chitin synthase activity	GO:0006031//chitin biosynthetic process;GO:0007275//multicellular organism development;GO:0061063//positive regulation of nematode larval development
MSTRG.15726.1	Sfur008604	-0.972055419	0.001160438	chs-2	Chitin synthase chs-2	Metabolism;Metabolism	Global and overview maps;Carbohydrate metabolism	ko01100//Metabolic pathways;ko00520//Amino sugar and nucleotide sugar metabolism	K00698;K00698	GO:0005886//plasma membrane;GO:0016021//integral component of membrane;GO:0030428//cell septum;GO:0071944//cell periphery	GO:0004100//chitin synthase activity	GO:0006031//chitin biosynthetic process;GO:0007275//multicellular organism development;GO:0061063//positive regulation of nematode larval development
MSTRG.23058.1	Sfur008604	0.993005531	7.32E-05	chs-2	Chitin synthase chs-2	Metabolism;Metabolism	Global and overview maps;Carbohydrate metabolism	ko01100//Metabolic pathways;ko00520//Amino sugar and nucleotide sugar metabolism	K00698;K00698	GO:0005886//plasma membrane;GO:0016021//integral component of membrane;GO:0030428//cell septum;GO:0071944//cell periphery	GO:0004100//chitin synthase activity	GO:0006031//chitin biosynthetic process;GO:0007275//multicellular organism development;GO:0061063//positive regulation of nematode larval development
MSTRG.32265.2	Sfur008604	0.973564822	0.001038991	chs-2	Chitin synthase chs-2	Metabolism;Metabolism	Global and overview maps;Carbohydrate metabolism	ko01100//Metabolic pathways;ko00520//Amino sugar and nucleotide sugar metabolism	K00698;K00698	GO:0005886//plasma membrane;GO:0016021//integral component of membrane;GO:0030428//cell septum;GO:0071944//cell periphery	GO:0004100//chitin synthase activity	GO:0006031//chitin biosynthetic process;GO:0007275//multicellular organism development;GO:0061063//positive regulation of nematode larval development
MSTRG.2075.2	Sfur008604	0.978522407	0.000686977	chs-2	Chitin synthase chs-2	Metabolism;Metabolism	Global and overview maps;Carbohydrate metabolism	ko01100//Metabolic pathways;ko00520//Amino sugar and nucleotide sugar metabolism	K00698;K00698	GO:0005886//plasma membrane;GO:0016021//integral component of membrane;GO:0030428//cell septum;GO:0071944//cell periphery	GO:0004100//chitin synthase activity	GO:0006031//chitin biosynthetic process;GO:0007275//multicellular organism development;GO:0061063//positive regulation of nematode larval development
MSTRG.26787.1	Sfur008604	0.970142863	0.001323865	chs-2	Chitin synthase chs-2	Metabolism;Metabolism	Global and overview maps;Carbohydrate metabolism	ko01100//Metabolic pathways;ko00520//Amino sugar and nucleotide sugar metabolism	K00698;K00698	GO:0005886//plasma membrane;GO:0016021//integral component of membrane;GO:0030428//cell septum;GO:0071944//cell periphery	GO:0004100//chitin synthase activity	GO:0006031//chitin biosynthetic process;GO:0007275//multicellular organism development;GO:0061063//positive regulation of nematode larval development
MSTRG.25635.1	Sfur008604	-0.975500941	0.000892954	chs-2	Chitin synthase chs-2	Metabolism;Metabolism	Global and overview maps;Carbohydrate metabolism	ko01100//Metabolic pathways;ko00520//Amino sugar and nucleotide sugar metabolism	K00698;K00698	GO:0005886//plasma membrane;GO:0016021//integral component of membrane;GO:0030428//cell septum;GO:0071944//cell periphery	GO:0004100//chitin synthase activity	GO:0006031//chitin biosynthetic process;GO:0007275//multicellular organism development;GO:0061063//positive regulation of nematode larval development
MSTRG.6886.1	Sfur008604	0.962337508	0.002100984	chs-2	Chitin synthase chs-2	Metabolism;Metabolism	Global and overview maps;Carbohydrate metabolism	ko01100//Metabolic pathways;ko00520//Amino sugar and nucleotide sugar metabolism	K00698;K00698	GO:0005886//plasma membrane;GO:0016021//integral component of membrane;GO:0030428//cell septum;GO:0071944//cell periphery	GO:0004100//chitin synthase activity	GO:0006031//chitin biosynthetic process;GO:0007275//multicellular organism development;GO:0061063//positive regulation of nematode larval development
MSTRG.28591.1	Sfur008604	-0.988413256	0.000200601	chs-2	Chitin synthase chs-2	Metabolism;Metabolism	Global and overview maps;Carbohydrate metabolism	ko01100//Metabolic pathways;ko00520//Amino sugar and nucleotide sugar metabolism	K00698;K00698	GO:0005886//plasma membrane;GO:0016021//integral component of membrane;GO:0030428//cell septum;GO:0071944//cell periphery	GO:0004100//chitin synthase activity	GO:0006031//chitin biosynthetic process;GO:0007275//multicellular organism development;GO:0061063//positive regulation of nematode larval development
MSTRG.33771.1	Sfur008604	-0.965237318	0.001791662	chs-2	Chitin synthase chs-2	Metabolism;Metabolism	Global and overview maps;Carbohydrate metabolism	ko01100//Metabolic pathways;ko00520//Amino sugar and nucleotide sugar metabolism	K00698;K00698	GO:0005886//plasma membrane;GO:0016021//integral component of membrane;GO:0030428//cell septum;GO:0071944//cell periphery	GO:0004100//chitin synthase activity	GO:0006031//chitin biosynthetic process;GO:0007275//multicellular organism development;GO:0061063//positive regulation of nematode larval development
MSTRG.5073.1	Sfur008604	-0.964153653	0.00190441	chs-2	Chitin synthase chs-2	Metabolism;Metabolism	Global and overview maps;Carbohydrate metabolism	ko01100//Metabolic pathways;ko00520//Amino sugar and nucleotide sugar metabolism	K00698;K00698	GO:0005886//plasma membrane;GO:0016021//integral component of membrane;GO:0030428//cell septum;GO:0071944//cell periphery	GO:0004100//chitin synthase activity	GO:0006031//chitin biosynthetic process;GO:0007275//multicellular organism development;GO:0061063//positive regulation of nematode larval development
MSTRG.27716.2	Sfur008604	-0.983090661	0.000426471	chs-2	Chitin synthase chs-2	Metabolism;Metabolism	Global and overview maps;Carbohydrate metabolism	ko01100//Metabolic pathways;ko00520//Amino sugar and nucleotide sugar metabolism	K00698;K00698	GO:0005886//plasma membrane;GO:0016021//integral component of membrane;GO:0030428//cell septum;GO:0071944//cell periphery	GO:0004100//chitin synthase activity	GO:0006031//chitin biosynthetic process;GO:0007275//multicellular organism development;GO:0061063//positive regulation of nematode larval development
MSTRG.18378.1	Sfur008604	0.959499816	0.002427182	chs-2	Chitin synthase chs-2	Metabolism;Metabolism	Global and overview maps;Carbohydrate metabolism	ko01100//Metabolic pathways;ko00520//Amino sugar and nucleotide sugar metabolism	K00698;K00698	GO:0005886//plasma membrane;GO:0016021//integral component of membrane;GO:0030428//cell septum;GO:0071944//cell periphery	GO:0004100//chitin synthase activity	GO:0006031//chitin biosynthetic process;GO:0007275//multicellular organism development;GO:0061063//positive regulation of nematode larval development
MSTRG.38021.1	Sfur008604	0.975054036	0.00092569	chs-2	Chitin synthase chs-2	Metabolism;Metabolism	Global and overview maps;Carbohydrate metabolism	ko01100//Metabolic pathways;ko00520//Amino sugar and nucleotide sugar metabolism	K00698;K00698	GO:0005886//plasma membrane;GO:0016021//integral component of membrane;GO:0030428//cell septum;GO:0071944//cell periphery	GO:0004100//chitin synthase activity	GO:0006031//chitin biosynthetic process;GO:0007275//multicellular organism development;GO:0061063//positive regulation of nematode larval development
MSTRG.39924.1	Sfur008604	-0.969461503	0.00138466	chs-2	Chitin synthase chs-2	Metabolism;Metabolism	Global and overview maps;Carbohydrate metabolism	ko01100//Metabolic pathways;ko00520//Amino sugar and nucleotide sugar metabolism	K00698;K00698	GO:0005886//plasma membrane;GO:0016021//integral component of membrane;GO:0030428//cell septum;GO:0071944//cell periphery	GO:0004100//chitin synthase activity	GO:0006031//chitin biosynthetic process;GO:0007275//multicellular organism development;GO:0061063//positive regulation of nematode larval development
MSTRG.15471.4	Sfur008604	0.961224422	0.002226168	chs-2	Chitin synthase chs-2	Metabolism;Metabolism	Global and overview maps;Carbohydrate metabolism	ko01100//Metabolic pathways;ko00520//Amino sugar and nucleotide sugar metabolism	K00698;K00698	GO:0005886//plasma membrane;GO:0016021//integral component of membrane;GO:0030428//cell septum;GO:0071944//cell periphery	GO:0004100//chitin synthase activity	GO:0006031//chitin biosynthetic process;GO:0007275//multicellular organism development;GO:0061063//positive regulation of nematode larval development
MSTRG.19038.1	Sfur008604	0.965933961	0.001720976	chs-2	Chitin synthase chs-2	Metabolism;Metabolism	Global and overview maps;Carbohydrate metabolism	ko01100//Metabolic pathways;ko00520//Amino sugar and nucleotide sugar metabolism	K00698;K00698	GO:0005886//plasma membrane;GO:0016021//integral component of membrane;GO:0030428//cell septum;GO:0071944//cell periphery	GO:0004100//chitin synthase activity	GO:0006031//chitin biosynthetic process;GO:0007275//multicellular organism development;GO:0061063//positive regulation of nematode larval development
MSTRG.25634.1	Sfur008604	-0.985589861	0.000309982	chs-2	Chitin synthase chs-2	Metabolism;Metabolism	Global and overview maps;Carbohydrate metabolism	ko01100//Metabolic pathways;ko00520//Amino sugar and nucleotide sugar metabolism	K00698;K00698	GO:0005886//plasma membrane;GO:0016021//integral component of membrane;GO:0030428//cell septum;GO:0071944//cell periphery	GO:0004100//chitin synthase activity	GO:0006031//chitin biosynthetic process;GO:0007275//multicellular organism development;GO:0061063//positive regulation of nematode larval development
MSTRG.32766.1	Sfur008604	-0.980223086	0.000582822	chs-2	Chitin synthase chs-2	Metabolism;Metabolism	Global and overview maps;Carbohydrate metabolism	ko01100//Metabolic pathways;ko00520//Amino sugar and nucleotide sugar metabolism	K00698;K00698	GO:0005886//plasma membrane;GO:0016021//integral component of membrane;GO:0030428//cell septum;GO:0071944//cell periphery	GO:0004100//chitin synthase activity	GO:0006031//chitin biosynthetic process;GO:0007275//multicellular organism development;GO:0061063//positive regulation of nematode larval development
MSTRG.2861.1	Sfur008604	-0.979779449	0.000609172	chs-2	Chitin synthase chs-2	Metabolism;Metabolism	Global and overview maps;Carbohydrate metabolism	ko01100//Metabolic pathways;ko00520//Amino sugar and nucleotide sugar metabolism	K00698;K00698	GO:0005886//plasma membrane;GO:0016021//integral component of membrane;GO:0030428//cell septum;GO:0071944//cell periphery	GO:0004100//chitin synthase activity	GO:0006031//chitin biosynthetic process;GO:0007275//multicellular organism development;GO:0061063//positive regulation of nematode larval development
MSTRG.27823.1	Sfur008604	-0.979349557	0.000635258	chs-2	Chitin synthase chs-2	Metabolism;Metabolism	Global and overview maps;Carbohydrate metabolism	ko01100//Metabolic pathways;ko00520//Amino sugar and nucleotide sugar metabolism	K00698;K00698	GO:0005886//plasma membrane;GO:0016021//integral component of membrane;GO:0030428//cell septum;GO:0071944//cell periphery	GO:0004100//chitin synthase activity	GO:0006031//chitin biosynthetic process;GO:0007275//multicellular organism development;GO:0061063//positive regulation of nematode larval development
MSTRG.36079.1	Sfur008604	-0.981306414	0.000520909	chs-2	Chitin synthase chs-2	Metabolism;Metabolism	Global and overview maps;Carbohydrate metabolism	ko01100//Metabolic pathways;ko00520//Amino sugar and nucleotide sugar metabolism	K00698;K00698	GO:0005886//plasma membrane;GO:0016021//integral component of membrane;GO:0030428//cell septum;GO:0071944//cell periphery	GO:0004100//chitin synthase activity	GO:0006031//chitin biosynthetic process;GO:0007275//multicellular organism development;GO:0061063//positive regulation of nematode larval development
MSTRG.25629.14	Sfur008604	-0.985251231	0.000324685	chs-2	Chitin synthase chs-2	Metabolism;Metabolism	Global and overview maps;Carbohydrate metabolism	ko01100//Metabolic pathways;ko00520//Amino sugar and nucleotide sugar metabolism	K00698;K00698	GO:0005886//plasma membrane;GO:0016021//integral component of membrane;GO:0030428//cell septum;GO:0071944//cell periphery	GO:0004100//chitin synthase activity	GO:0006031//chitin biosynthetic process;GO:0007275//multicellular organism development;GO:0061063//positive regulation of nematode larval development
MSTRG.14989.1	Sfur008604	0.964476846	0.001870428	chs-2	Chitin synthase chs-2	Metabolism;Metabolism	Global and overview maps;Carbohydrate metabolism	ko01100//Metabolic pathways;ko00520//Amino sugar and nucleotide sugar metabolism	K00698;K00698	GO:0005886//plasma membrane;GO:0016021//integral component of membrane;GO:0030428//cell septum;GO:0071944//cell periphery	GO:0004100//chitin synthase activity	GO:0006031//chitin biosynthetic process;GO:0007275//multicellular organism development;GO:0061063//positive regulation of nematode larval development
MSTRG.21282.2	Sfur008604	-0.951287635	0.003501547	chs-2	Chitin synthase chs-2	Metabolism;Metabolism	Global and overview maps;Carbohydrate metabolism	ko01100//Metabolic pathways;ko00520//Amino sugar and nucleotide sugar metabolism	K00698;K00698	GO:0005886//plasma membrane;GO:0016021//integral component of membrane;GO:0030428//cell septum;GO:0071944//cell periphery	GO:0004100//chitin synthase activity	GO:0006031//chitin biosynthetic process;GO:0007275//multicellular organism development;GO:0061063//positive regulation of nematode larval development
MSTRG.17390.1	Sfur008604	-0.994317934	4.83E-05	chs-2	Chitin synthase chs-2	Metabolism;Metabolism	Global and overview maps;Carbohydrate metabolism	ko01100//Metabolic pathways;ko00520//Amino sugar and nucleotide sugar metabolism	K00698;K00698	GO:0005886//plasma membrane;GO:0016021//integral component of membrane;GO:0030428//cell septum;GO:0071944//cell periphery	GO:0004100//chitin synthase activity	GO:0006031//chitin biosynthetic process;GO:0007275//multicellular organism development;GO:0061063//positive regulation of nematode larval development
MSTRG.27226.1	Sfur008604	-0.990895298	0.000123966	chs-2	Chitin synthase chs-2	Metabolism;Metabolism	Global and overview maps;Carbohydrate metabolism	ko01100//Metabolic pathways;ko00520//Amino sugar and nucleotide sugar metabolism	K00698;K00698	GO:0005886//plasma membrane;GO:0016021//integral component of membrane;GO:0030428//cell septum;GO:0071944//cell periphery	GO:0004100//chitin synthase activity	GO:0006031//chitin biosynthetic process;GO:0007275//multicellular organism development;GO:0061063//positive regulation of nematode larval development
MSTRG.1847.1	Sfur008604	0.988082326	0.0002122	chs-2	Chitin synthase chs-2	Metabolism;Metabolism	Global and overview maps;Carbohydrate metabolism	ko01100//Metabolic pathways;ko00520//Amino sugar and nucleotide sugar metabolism	K00698;K00698	GO:0005886//plasma membrane;GO:0016021//integral component of membrane;GO:0030428//cell septum;GO:0071944//cell periphery	GO:0004100//chitin synthase activity	GO:0006031//chitin biosynthetic process;GO:0007275//multicellular organism development;GO:0061063//positive regulation of nematode larval development
MSTRG.20196.1	Sfur008604	-0.962737283	0.002056895	chs-2	Chitin synthase chs-2	Metabolism;Metabolism	Global and overview maps;Carbohydrate metabolism	ko01100//Metabolic pathways;ko00520//Amino sugar and nucleotide sugar metabolism	K00698;K00698	GO:0005886//plasma membrane;GO:0016021//integral component of membrane;GO:0030428//cell septum;GO:0071944//cell periphery	GO:0004100//chitin synthase activity	GO:0006031//chitin biosynthetic process;GO:0007275//multicellular organism development;GO:0061063//positive regulation of nematode larval development
MSTRG.39026.1	Sfur008604	-0.95463948	0.003039699	chs-2	Chitin synthase chs-2	Metabolism;Metabolism	Global and overview maps;Carbohydrate metabolism	ko01100//Metabolic pathways;ko00520//Amino sugar and nucleotide sugar metabolism	K00698;K00698	GO:0005886//plasma membrane;GO:0016021//integral component of membrane;GO:0030428//cell septum;GO:0071944//cell periphery	GO:0004100//chitin synthase activity	GO:0006031//chitin biosynthetic process;GO:0007275//multicellular organism development;GO:0061063//positive regulation of nematode larval development
MSTRG.24931.1	Sfur008604	-0.962414155	0.002092495	chs-2	Chitin synthase chs-2	Metabolism;Metabolism	Global and overview maps;Carbohydrate metabolism	ko01100//Metabolic pathways;ko00520//Amino sugar and nucleotide sugar metabolism	K00698;K00698	GO:0005886//plasma membrane;GO:0016021//integral component of membrane;GO:0030428//cell septum;GO:0071944//cell periphery	GO:0004100//chitin synthase activity	GO:0006031//chitin biosynthetic process;GO:0007275//multicellular organism development;GO:0061063//positive regulation of nematode larval development
MSTRG.22908.1	Sfur008604	-0.985911161	0.000296345	chs-2	Chitin synthase chs-2	Metabolism;Metabolism	Global and overview maps;Carbohydrate metabolism	ko01100//Metabolic pathways;ko00520//Amino sugar and nucleotide sugar metabolism	K00698;K00698	GO:0005886//plasma membrane;GO:0016021//integral component of membrane;GO:0030428//cell septum;GO:0071944//cell periphery	GO:0004100//chitin synthase activity	GO:0006031//chitin biosynthetic process;GO:0007275//multicellular organism development;GO:0061063//positive regulation of nematode larval development
MSTRG.32816.1	Sfur008604	0.956335271	0.002818287	chs-2	Chitin synthase chs-2	Metabolism;Metabolism	Global and overview maps;Carbohydrate metabolism	ko01100//Metabolic pathways;ko00520//Amino sugar and nucleotide sugar metabolism	K00698;K00698	GO:0005886//plasma membrane;GO:0016021//integral component of membrane;GO:0030428//cell septum;GO:0071944//cell periphery	GO:0004100//chitin synthase activity	GO:0006031//chitin biosynthetic process;GO:0007275//multicellular organism development;GO:0061063//positive regulation of nematode larval development
MSTRG.38291.4	Sfur008604	-0.975773267	0.000873292	chs-2	Chitin synthase chs-2	Metabolism;Metabolism	Global and overview maps;Carbohydrate metabolism	ko01100//Metabolic pathways;ko00520//Amino sugar and nucleotide sugar metabolism	K00698;K00698	GO:0005886//plasma membrane;GO:0016021//integral component of membrane;GO:0030428//cell septum;GO:0071944//cell periphery	GO:0004100//chitin synthase activity	GO:0006031//chitin biosynthetic process;GO:0007275//multicellular organism development;GO:0061063//positive regulation of nematode larval development
MSTRG.14662.2	Sfur008604	-0.976960032	0.000790145	chs-2	Chitin synthase chs-2	Metabolism;Metabolism	Global and overview maps;Carbohydrate metabolism	ko01100//Metabolic pathways;ko00520//Amino sugar and nucleotide sugar metabolism	K00698;K00698	GO:0005886//plasma membrane;GO:0016021//integral component of membrane;GO:0030428//cell septum;GO:0071944//cell periphery	GO:0004100//chitin synthase activity	GO:0006031//chitin biosynthetic process;GO:0007275//multicellular organism development;GO:0061063//positive regulation of nematode larval development
MSTRG.21441.2	Sfur008604	-0.982549855	0.000454104	chs-2	Chitin synthase chs-2	Metabolism;Metabolism	Global and overview maps;Carbohydrate metabolism	ko01100//Metabolic pathways;ko00520//Amino sugar and nucleotide sugar metabolism	K00698;K00698	GO:0005886//plasma membrane;GO:0016021//integral component of membrane;GO:0030428//cell septum;GO:0071944//cell periphery	GO:0004100//chitin synthase activity	GO:0006031//chitin biosynthetic process;GO:0007275//multicellular organism development;GO:0061063//positive regulation of nematode larval development
MSTRG.32361.3	Sfur008604	0.97479923	0.000944616	chs-2	Chitin synthase chs-2	Metabolism;Metabolism	Global and overview maps;Carbohydrate metabolism	ko01100//Metabolic pathways;ko00520//Amino sugar and nucleotide sugar metabolism	K00698;K00698	GO:0005886//plasma membrane;GO:0016021//integral component of membrane;GO:0030428//cell septum;GO:0071944//cell periphery	GO:0004100//chitin synthase activity	GO:0006031//chitin biosynthetic process;GO:0007275//multicellular organism development;GO:0061063//positive regulation of nematode larval development
MSTRG.30687.1	Sfur008604	0.993441556	6.44E-05	chs-2	Chitin synthase chs-2	Metabolism;Metabolism	Global and overview maps;Carbohydrate metabolism	ko01100//Metabolic pathways;ko00520//Amino sugar and nucleotide sugar metabolism	K00698;K00698	GO:0005886//plasma membrane;GO:0016021//integral component of membrane;GO:0030428//cell septum;GO:0071944//cell periphery	GO:0004100//chitin synthase activity	GO:0006031//chitin biosynthetic process;GO:0007275//multicellular organism development;GO:0061063//positive regulation of nematode larval development
MSTRG.3975.1	Sfur008604	-0.970341836	0.001306366	chs-2	Chitin synthase chs-2	Metabolism;Metabolism	Global and overview maps;Carbohydrate metabolism	ko01100//Metabolic pathways;ko00520//Amino sugar and nucleotide sugar metabolism	K00698;K00698	GO:0005886//plasma membrane;GO:0016021//integral component of membrane;GO:0030428//cell septum;GO:0071944//cell periphery	GO:0004100//chitin synthase activity	GO:0006031//chitin biosynthetic process;GO:0007275//multicellular organism development;GO:0061063//positive regulation of nematode larval development
MSTRG.4704.1	Sfur008604	0.967003494	0.001615191	chs-2	Chitin synthase chs-2	Metabolism;Metabolism	Global and overview maps;Carbohydrate metabolism	ko01100//Metabolic pathways;ko00520//Amino sugar and nucleotide sugar metabolism	K00698;K00698	GO:0005886//plasma membrane;GO:0016021//integral component of membrane;GO:0030428//cell septum;GO:0071944//cell periphery	GO:0004100//chitin synthase activity	GO:0006031//chitin biosynthetic process;GO:0007275//multicellular organism development;GO:0061063//positive regulation of nematode larval development
MSTRG.11031.1	Sfur008604	0.973734239	0.001025775	chs-2	Chitin synthase chs-2	Metabolism;Metabolism	Global and overview maps;Carbohydrate metabolism	ko01100//Metabolic pathways;ko00520//Amino sugar and nucleotide sugar metabolism	K00698;K00698	GO:0005886//plasma membrane;GO:0016021//integral component of membrane;GO:0030428//cell septum;GO:0071944//cell periphery	GO:0004100//chitin synthase activity	GO:0006031//chitin biosynthetic process;GO:0007275//multicellular organism development;GO:0061063//positive regulation of nematode larval development
MSTRG.2137.1	Sfur008604	0.982714988	0.000445575	chs-2	Chitin synthase chs-2	Metabolism;Metabolism	Global and overview maps;Carbohydrate metabolism	ko01100//Metabolic pathways;ko00520//Amino sugar and nucleotide sugar metabolism	K00698;K00698	GO:0005886//plasma membrane;GO:0016021//integral component of membrane;GO:0030428//cell septum;GO:0071944//cell periphery	GO:0004100//chitin synthase activity	GO:0006031//chitin biosynthetic process;GO:0007275//multicellular organism development;GO:0061063//positive regulation of nematode larval development
MSTRG.32053.1	Sfur008604	-0.971235361	0.001229207	chs-2	Chitin synthase chs-2	Metabolism;Metabolism	Global and overview maps;Carbohydrate metabolism	ko01100//Metabolic pathways;ko00520//Amino sugar and nucleotide sugar metabolism	K00698;K00698	GO:0005886//plasma membrane;GO:0016021//integral component of membrane;GO:0030428//cell septum;GO:0071944//cell periphery	GO:0004100//chitin synthase activity	GO:0006031//chitin biosynthetic process;GO:0007275//multicellular organism development;GO:0061063//positive regulation of nematode larval development
MSTRG.24047.1	Sfur008604	-0.99342475	6.47E-05	chs-2	Chitin synthase chs-2	Metabolism;Metabolism	Global and overview maps;Carbohydrate metabolism	ko01100//Metabolic pathways;ko00520//Amino sugar and nucleotide sugar metabolism	K00698;K00698	GO:0005886//plasma membrane;GO:0016021//integral component of membrane;GO:0030428//cell septum;GO:0071944//cell periphery	GO:0004100//chitin synthase activity	GO:0006031//chitin biosynthetic process;GO:0007275//multicellular organism development;GO:0061063//positive regulation of nematode larval development
MSTRG.29422.2	Sfur008604	-0.954493496	0.003059144	chs-2	Chitin synthase chs-2	Metabolism;Metabolism	Global and overview maps;Carbohydrate metabolism	ko01100//Metabolic pathways;ko00520//Amino sugar and nucleotide sugar metabolism	K00698;K00698	GO:0005886//plasma membrane;GO:0016021//integral component of membrane;GO:0030428//cell septum;GO:0071944//cell periphery	GO:0004100//chitin synthase activity	GO:0006031//chitin biosynthetic process;GO:0007275//multicellular organism development;GO:0061063//positive regulation of nematode larval development
MSTRG.25435.2	Sfur008604	-0.955609541	0.002912033	chs-2	Chitin synthase chs-2	Metabolism;Metabolism	Global and overview maps;Carbohydrate metabolism	ko01100//Metabolic pathways;ko00520//Amino sugar and nucleotide sugar metabolism	K00698;K00698	GO:0005886//plasma membrane;GO:0016021//integral component of membrane;GO:0030428//cell septum;GO:0071944//cell periphery	GO:0004100//chitin synthase activity	GO:0006031//chitin biosynthetic process;GO:0007275//multicellular organism development;GO:0061063//positive regulation of nematode larval development
MSTRG.14616.1	Sfur008604	-0.96603576	0.001710764	chs-2	Chitin synthase chs-2	Metabolism;Metabolism	Global and overview maps;Carbohydrate metabolism	ko01100//Metabolic pathways;ko00520//Amino sugar and nucleotide sugar metabolism	K00698;K00698	GO:0005886//plasma membrane;GO:0016021//integral component of membrane;GO:0030428//cell septum;GO:0071944//cell periphery	GO:0004100//chitin synthase activity	GO:0006031//chitin biosynthetic process;GO:0007275//multicellular organism development;GO:0061063//positive regulation of nematode larval development
MSTRG.122.1	Sfur008604	-0.972512568	0.001122954	chs-2	Chitin synthase chs-2	Metabolism;Metabolism	Global and overview maps;Carbohydrate metabolism	ko01100//Metabolic pathways;ko00520//Amino sugar and nucleotide sugar metabolism	K00698;K00698	GO:0005886//plasma membrane;GO:0016021//integral component of membrane;GO:0030428//cell septum;GO:0071944//cell periphery	GO:0004100//chitin synthase activity	GO:0006031//chitin biosynthetic process;GO:0007275//multicellular organism development;GO:0061063//positive regulation of nematode larval development
MSTRG.39767.1	Sfur008604	0.971120377	0.001239006	chs-2	Chitin synthase chs-2	Metabolism;Metabolism	Global and overview maps;Carbohydrate metabolism	ko01100//Metabolic pathways;ko00520//Amino sugar and nucleotide sugar metabolism	K00698;K00698	GO:0005886//plasma membrane;GO:0016021//integral component of membrane;GO:0030428//cell septum;GO:0071944//cell periphery	GO:0004100//chitin synthase activity	GO:0006031//chitin biosynthetic process;GO:0007275//multicellular organism development;GO:0061063//positive regulation of nematode larval development
MSTRG.25578.1	Sfur008604	-0.962470954	0.002086215	chs-2	Chitin synthase chs-2	Metabolism;Metabolism	Global and overview maps;Carbohydrate metabolism	ko01100//Metabolic pathways;ko00520//Amino sugar and nucleotide sugar metabolism	K00698;K00698	GO:0005886//plasma membrane;GO:0016021//integral component of membrane;GO:0030428//cell septum;GO:0071944//cell periphery	GO:0004100//chitin synthase activity	GO:0006031//chitin biosynthetic process;GO:0007275//multicellular organism development;GO:0061063//positive regulation of nematode larval development
MSTRG.7214.1	Sfur008604	0.98518909	0.00032742	chs-2	Chitin synthase chs-2	Metabolism;Metabolism	Global and overview maps;Carbohydrate metabolism	ko01100//Metabolic pathways;ko00520//Amino sugar and nucleotide sugar metabolism	K00698;K00698	GO:0005886//plasma membrane;GO:0016021//integral component of membrane;GO:0030428//cell septum;GO:0071944//cell periphery	GO:0004100//chitin synthase activity	GO:0006031//chitin biosynthetic process;GO:0007275//multicellular organism development;GO:0061063//positive regulation of nematode larval development
MSTRG.1309.1	Sfur008604	0.951405814	0.003484717	chs-2	Chitin synthase chs-2	Metabolism;Metabolism	Global and overview maps;Carbohydrate metabolism	ko01100//Metabolic pathways;ko00520//Amino sugar and nucleotide sugar metabolism	K00698;K00698	GO:0005886//plasma membrane;GO:0016021//integral component of membrane;GO:0030428//cell septum;GO:0071944//cell periphery	GO:0004100//chitin synthase activity	GO:0006031//chitin biosynthetic process;GO:0007275//multicellular organism development;GO:0061063//positive regulation of nematode larval development
MSTRG.4310.1	Sfur008604	-0.966303199	0.001684081	chs-2	Chitin synthase chs-2	Metabolism;Metabolism	Global and overview maps;Carbohydrate metabolism	ko01100//Metabolic pathways;ko00520//Amino sugar and nucleotide sugar metabolism	K00698;K00698	GO:0005886//plasma membrane;GO:0016021//integral component of membrane;GO:0030428//cell septum;GO:0071944//cell periphery	GO:0004100//chitin synthase activity	GO:0006031//chitin biosynthetic process;GO:0007275//multicellular organism development;GO:0061063//positive regulation of nematode larval development
MSTRG.21030.1	Sfur008604	-0.979541532	0.000623542	chs-2	Chitin synthase chs-2	Metabolism;Metabolism	Global and overview maps;Carbohydrate metabolism	ko01100//Metabolic pathways;ko00520//Amino sugar and nucleotide sugar metabolism	K00698;K00698	GO:0005886//plasma membrane;GO:0016021//integral component of membrane;GO:0030428//cell septum;GO:0071944//cell periphery	GO:0004100//chitin synthase activity	GO:0006031//chitin biosynthetic process;GO:0007275//multicellular organism development;GO:0061063//positive regulation of nematode larval development
MSTRG.32768.1	Sfur008604	-0.9658657	0.00172784	chs-2	Chitin synthase chs-2	Metabolism;Metabolism	Global and overview maps;Carbohydrate metabolism	ko01100//Metabolic pathways;ko00520//Amino sugar and nucleotide sugar metabolism	K00698;K00698	GO:0005886//plasma membrane;GO:0016021//integral component of membrane;GO:0030428//cell septum;GO:0071944//cell periphery	GO:0004100//chitin synthase activity	GO:0006031//chitin biosynthetic process;GO:0007275//multicellular organism development;GO:0061063//positive regulation of nematode larval development
MSTRG.12968.2	Sfur008604	-0.993402283	6.52E-05	chs-2	Chitin synthase chs-2	Metabolism;Metabolism	Global and overview maps;Carbohydrate metabolism	ko01100//Metabolic pathways;ko00520//Amino sugar and nucleotide sugar metabolism	K00698;K00698	GO:0005886//plasma membrane;GO:0016021//integral component of membrane;GO:0030428//cell septum;GO:0071944//cell periphery	GO:0004100//chitin synthase activity	GO:0006031//chitin biosynthetic process;GO:0007275//multicellular organism development;GO:0061063//positive regulation of nematode larval development
MSTRG.6175.1	Sfur008604	-0.958767081	0.002515179	chs-2	Chitin synthase chs-2	Metabolism;Metabolism	Global and overview maps;Carbohydrate metabolism	ko01100//Metabolic pathways;ko00520//Amino sugar and nucleotide sugar metabolism	K00698;K00698	GO:0005886//plasma membrane;GO:0016021//integral component of membrane;GO:0030428//cell septum;GO:0071944//cell periphery	GO:0004100//chitin synthase activity	GO:0006031//chitin biosynthetic process;GO:0007275//multicellular organism development;GO:0061063//positive regulation of nematode larval development
MSTRG.22706.3	Sfur008604	-0.985322402	0.000321567	chs-2	Chitin synthase chs-2	Metabolism;Metabolism	Global and overview maps;Carbohydrate metabolism	ko01100//Metabolic pathways;ko00520//Amino sugar and nucleotide sugar metabolism	K00698;K00698	GO:0005886//plasma membrane;GO:0016021//integral component of membrane;GO:0030428//cell septum;GO:0071944//cell periphery	GO:0004100//chitin synthase activity	GO:0006031//chitin biosynthetic process;GO:0007275//multicellular organism development;GO:0061063//positive regulation of nematode larval development
MSTRG.3820.1	Sfur008604	-0.976870611	0.000796266	chs-2	Chitin synthase chs-2	Metabolism;Metabolism	Global and overview maps;Carbohydrate metabolism	ko01100//Metabolic pathways;ko00520//Amino sugar and nucleotide sugar metabolism	K00698;K00698	GO:0005886//plasma membrane;GO:0016021//integral component of membrane;GO:0030428//cell septum;GO:0071944//cell periphery	GO:0004100//chitin synthase activity	GO:0006031//chitin biosynthetic process;GO:0007275//multicellular organism development;GO:0061063//positive regulation of nematode larval development
MSTRG.24932.1	Sfur008604	-0.962722487	0.002058519	chs-2	Chitin synthase chs-2	Metabolism;Metabolism	Global and overview maps;Carbohydrate metabolism	ko01100//Metabolic pathways;ko00520//Amino sugar and nucleotide sugar metabolism	K00698;K00698	GO:0005886//plasma membrane;GO:0016021//integral component of membrane;GO:0030428//cell septum;GO:0071944//cell periphery	GO:0004100//chitin synthase activity	GO:0006031//chitin biosynthetic process;GO:0007275//multicellular organism development;GO:0061063//positive regulation of nematode larval development
MSTRG.18627.1	Sfur008604	0.961322763	0.002214964	chs-2	Chitin synthase chs-2	Metabolism;Metabolism	Global and overview maps;Carbohydrate metabolism	ko01100//Metabolic pathways;ko00520//Amino sugar and nucleotide sugar metabolism	K00698;K00698	GO:0005886//plasma membrane;GO:0016021//integral component of membrane;GO:0030428//cell septum;GO:0071944//cell periphery	GO:0004100//chitin synthase activity	GO:0006031//chitin biosynthetic process;GO:0007275//multicellular organism development;GO:0061063//positive regulation of nematode larval development
MSTRG.37501.1	Sfur008604	-0.964080439	0.00191215	chs-2	Chitin synthase chs-2	Metabolism;Metabolism	Global and overview maps;Carbohydrate metabolism	ko01100//Metabolic pathways;ko00520//Amino sugar and nucleotide sugar metabolism	K00698;K00698	GO:0005886//plasma membrane;GO:0016021//integral component of membrane;GO:0030428//cell septum;GO:0071944//cell periphery	GO:0004100//chitin synthase activity	GO:0006031//chitin biosynthetic process;GO:0007275//multicellular organism development;GO:0061063//positive regulation of nematode larval development
MSTRG.3765.1	Sfur008604	-0.984795038	0.000345029	chs-2	Chitin synthase chs-2	Metabolism;Metabolism	Global and overview maps;Carbohydrate metabolism	ko01100//Metabolic pathways;ko00520//Amino sugar and nucleotide sugar metabolism	K00698;K00698	GO:0005886//plasma membrane;GO:0016021//integral component of membrane;GO:0030428//cell septum;GO:0071944//cell periphery	GO:0004100//chitin synthase activity	GO:0006031//chitin biosynthetic process;GO:0007275//multicellular organism development;GO:0061063//positive regulation of nematode larval development
MSTRG.23081.2	Sfur008604	-0.980623584	0.000559531	chs-2	Chitin synthase chs-2	Metabolism;Metabolism	Global and overview maps;Carbohydrate metabolism	ko01100//Metabolic pathways;ko00520//Amino sugar and nucleotide sugar metabolism	K00698;K00698	GO:0005886//plasma membrane;GO:0016021//integral component of membrane;GO:0030428//cell septum;GO:0071944//cell periphery	GO:0004100//chitin synthase activity	GO:0006031//chitin biosynthetic process;GO:0007275//multicellular organism development;GO:0061063//positive regulation of nematode larval development
[truncated: 1,108 more rows]
